# Supplementary material for: Transcriptomic and Metabolomic Analysis of a Pseudomonas-Resistant versus a Susceptible Arabidopsis Accession
Source: Int J Mol Sci. 2022 Oct 11;23(20):12087. doi: 10.3390/ijms232012087 (PMC9603445; doi:10.3390/ijms232012087)
Supplement: Supplementary file 1 [file ijms-23-12087-s001.zip]

Archive with 14 entries (14 files):
- Orf&Tenenboim_IJMS2022_Pst_supplement_captions.pdf
- SupFig S1_PstTS_PCA.png
- SupFig S2_oplsda_gsl.png
- SupFig S3_early-late.png
- Supplemental Table S1.xlsx
- Supplemental Table S2.xlsx
- Supplemental Table S3.xlsx
- Supplemental Table S4.xlsx
- Supplemental Table S5.xlsx
- Supplemental Table S6.xlsx
- Supplemental Table S7.xlsx
- Supplemental Table S8.xlsx
- Supplementary Table S10 Metabolite documentation.xlsx
- Supplementary Table S9 Metabolite checklist.xlsx
