# Supplementary material for: Transcriptomic and Metabolomic Analysis of a Pseudomonas-Resistant versus a Susceptible Arabidopsis Accession
Source: Int J Mol Sci. 2022 Oct 11;23(20):12087. doi: 10.3390/ijms232012087 (PMC9603445; doi:10.3390/ijms232012087)
Supplement: Supplementary file 1 [file ijms-23-12087-s001.zip › Supplemental Table S1.xlsx]

## Sheet: Microarray_DEGs
Supplemental Table 1: Gene expression in Col-0 and C24 after Pst infection: Plants were either sprayed with Pst (Pst infection) or MgCl2 solution (mock treatment) and samples taken after 2h, 4h, 8h, 16, 24h, and 48h. Gene expression was assessed using the Affymetrix Gene Arabidopsis 1.0 ST microarray publicly available at NCBI, GEO accession GSE90852. Columns A and B contain probe names and gene …
Affymetrix ST 1.0 Probe	Gene identifier	2h Col-0 Mock	4h Col-0 Mock	8h Col-0 Mock	16h Col-0 Mock	24h Col-0 Mock	48h Col-0 Mock	2h Col-0 Pst	4h Col-0 Pst	8h Col-0 Pst	16h Col-0 Pst	24h Col-0 Pst	48h Col-0 Pst	2h C24 Mock	4h C24 Mock	8h C24 Mock	16h C24 Mock	24h C24 Mock	48h C24 Mock	2h C24 Pst	4h C24 Pst	8h C24 Pst	16h C24 Pst	24h C24 Pst	48h C24 Pst	2h C24 Mock - Col-0 Mock	4h C24 Mock - Col-0 Mock	8h C24 Mock - Col-0 Mock	16h C24 Mock - Col-0 Mock	24h C24 Mock - Col-0 Mock	48h C24 Mock - Col-0 Mock	2h Col-0 Pst - Mock	4h Col-0 Pst - Mock	8h Col-0 Pst - Mock	16h Col-0 Pst - Mock	24h Col-0 Pst - Mock	48h Col-0 Pst - Mock	2h C24 Pst - Mock	4h C24 Pst - Mock	8h C24 Pst - Mock	16h C24 Pst - Mock	24h C24 Pst - Mock	48h C24 Pst - Mock	2h C24 Pst - Col-0 Pst (each Mock subtracted)	4h C24 Pst - Col-0 Pst (each Mock subtracted)	8h C24 Pst - Col-0 Pst (each Mock subtracted)	16h C24 Pst - Col-0 Pst (each Mock subtracted)	24h C24 Pst - Col-0 Pst (each Mock subtracted)	48h C24 Pst - Col-0 Pst (each Mock subtracted)
13334158	AT1G01010	5.8407	5.662	5.97395	5.94164	5.43894	5.92212	6.09129	6.00116	6.7156	6.10156	6.49595	7.0426	7.39301	7.30856	7.7619	8.12088	7.84526	7.93193	8.04711	7.91422	7.94972	8.32385	8.19488	8.14125	1.5523	1.64655	1.78795	2.17924	2.40633	2.00981	0.250584	0.339157	0.741646	0.159917	1.05702	1.12048	0.654109	0.605659	0.187821	0.202964	0.349617	0.20932	0.403525	0.266502	-0.553825	0.043047	-0.707398	-0.911158
13334167	AT1G01040	8.49282	8.55728	8.5672	9.19568	8.74613	8.55413	8.49765	8.57668	8.33055	9.16838	8.65792	8.71242	8.7754	8.7837	8.70891	9.4411	9.05043	8.85467	8.62946	8.66932	8.50697	9.33763	8.95009	8.94497	0.282581	0.22642	0.141718	0.245414	0.304303	0.300537	0.004833	0.019401	-0.236651	-0.027309	-0.088212	0.158287	-0.145935	-0.114383	-0.201946	-0.103466	-0.100347	0.090302	-0.150768	-0.133784	0.034705	-0.076157	-0.012135	-0.067985
13334190	AT1G01040	4.63212	5.14391	5.74115	5.8832	5.84934	5.51039	5.26464	5.54144	5.42258	6.26739	5.25397	5.5553	5.60724	5.81548	5.2608	6.81692	5.9042	6.17967	5.4871	5.90493	4.95997	6.14991	6.42099	5.9146	0.975126	0.671571	-0.480344	0.933718	0.054856	0.669282	0.632527	0.39753	-0.318562	0.384187	-0.595366	0.044906	-0.120142	0.089445	-0.300829	-0.667008	0.516798	-0.265075	-0.752669	-0.308085	0.017733	-1.0512	1.11216	-0.309981
13334192	AT1G01073	3.04627	3.19208	2.88146	2.87515	3.1159	2.95087	3.12056	3.22796	2.7832	2.69022	2.92982	2.91698	3.11407	2.96916	2.76304	2.77728	2.86113	2.83689	3.13407	3.42034	2.92982	2.69567	3.03809	3.22906	0.067804	-0.222914	-0.118414	-0.097874	-0.254762	-0.113974	0.074296	0.035886	-0.09826	-0.184932	-0.186073	-0.03389	0.019998	0.451176	0.166778	-0.081612	0.176957	0.392168	-0.054298	0.41529	0.265038	0.10332	0.36303	0.426058
13334194	AT1G01110	6.86056	6.77318	6.69406	6.44379	6.84959	6.00119	7.03374	6.99719	6.32712	6.00671	6.6568	5.94196	6.66425	6.86771	7.14464	7.02381	7.1249	6.04183	6.35592	6.72574	6.89388	6.38171	6.51714	5.90019	-0.196307	0.094531	0.450576	0.580014	0.275305	0.040642	0.173187	0.224011	-0.366949	-0.437087	-0.192795	-0.05923	-0.308332	-0.141972	-0.250757	-0.642094	-0.607761	-0.141641	-0.481519	-0.365983	0.116192	-0.205007	-0.414966	-0.082411
13334202	AT1G01115	3.04206	3.58617	3.41363	3.44531	3.28721	3.32057	3.63987	3.65146	3.55212	3.76284	3.46132	3.42934	4.01831	3.61448	3.87403	3.86818	3.60175	3.7504	3.97629	3.83981	3.49605	3.83181	3.36542	3.63987	0.976248	0.02831	0.460392	0.422871	0.314538	0.429823	0.597815	0.065292	0.138481	0.317535	0.17411	0.108769	-0.04202	0.225332	-0.377977	-0.036368	-0.236334	-0.110521	-0.639835	0.16004	-0.516458	-0.353903	-0.410444	-0.21929
13334204	AT1G01160	10.1938	10.2322	10.3714	10.2716	10.1259	9.96084	10.1276	10.2764	10.3187	10.1822	10.0637	10.1601	10.1878	10.2524	10.2948	10.2928	10.1685	10.0204	10.0189	10.4	10.3549	10.1644	10.2632	10.1904	-0.00594	0.02023	-0.07658	0.02113	0.04266	0.059577	-0.0662	0.04416	-0.05271	-0.08947	-0.06218	0.199227	-0.1689	0.14751	0.06008	-0.12842	0.0947	0.16997	-0.1027	0.10335	0.11279	-0.03895	0.15688	-0.029257
13334213	AT1G01180	5.64204	5.18522	4.98329	5.57493	5.65393	5.1593	5.57326	5.3346	5.26426	5.67032	5.1473	4.97027	5.0638	4.8359	4.69423	4.89736	5.05509	4.69336	4.92897	4.86383	5.05882	5.4765	5.05798	4.56473	-0.578232	-0.349325	-0.289058	-0.677573	-0.598836	-0.465938	-0.06878	0.149371	0.280969	0.095392	-0.506624	-0.18903	-0.134835	0.027935	0.364589	0.579142	0.002893	-0.128633	-0.066055	-0.121436	0.08362	0.48375	0.509517	0.060397
13334217	AT1G01210	8.83009	8.65072	8.86218	8.86884	8.3634	8.84595	8.60332	8.39791	8.92562	8.57267	8.51693	8.54158	9.74327	9.83336	9.99071	9.87658	9.66109	9.6682	9.71794	9.77814	9.94601	9.73571	9.8524	9.66975	0.913182	1.18264	1.12853	1.00774	1.29769	0.822251	-0.226772	-0.252814	0.063439	-0.296172	0.153538	-0.304366	-0.02533	-0.055221	-0.044696	-0.140869	0.191314	0.001548	0.201442	0.197593	-0.108135	0.155303	0.037776	0.305914
13334223	AT1G01220	8.47133	8.48912	8.62981	8.7941	8.58782	8.51257	8.25144	8.38966	8.35139	8.71353	8.38765	8.18106	8.24444	8.38378	8.09822	8.54475	8.30711	8.20413	8.17845	8.10295	8.26078	8.2264	8.17389	7.93054	-0.226892	-0.105337	-0.531594	-0.249342	-0.280704	-0.30844	-0.219895	-0.099458	-0.278427	-0.080567	-0.200166	-0.331504	-0.065987	-0.280838	0.162557	-0.318356	-0.133228	-0.27359	0.153908	-0.18138	0.440984	-0.237789	0.066938	0.057914
13334233	AT1G01225	5.02124	4.76312	4.98257	4.85179	5.17699	4.72952	4.95619	4.72742	4.31367	4.71927	4.41816	4.36519	4.78148	4.43628	5.20678	4.94213	4.86332	4.84281	4.89181	4.70046	4.99907	4.572	4.78111	4.54398	-0.239762	-0.326846	0.224217	0.090338	-0.313671	0.113286	-0.065057	-0.035704	-0.6689	-0.132522	-0.758824	-0.364327	0.110331	0.264184	-0.207713	-0.370131	-0.082209	-0.298822	0.175388	0.299888	0.461187	-0.237609	0.676615	0.065505
13334238	AT1G01230	10.0853	10.155	9.78054	9.49396	9.9399	9.85418	10.0916	9.9453	10.0296	9.68931	9.90474	9.8895	9.98968	10.0865	9.93709	9.65633	9.68427	9.82837	10.1974	10.2163	9.99106	9.76226	9.80069	9.92822	-0.095634	-0.06846	0.156556	0.162371	-0.255638	-0.025809	0.00626	-0.209696	0.249071	0.19535	-0.035167	0.035313	0.207734	0.12977	0.053965	0.105929	0.116429	0.099843	0.201474	0.339466	-0.195106	-0.089421	0.151596	0.06453
13334244	AT1G01240	8.10786	7.79223	7.30921	6.91028	8.15527	7.9533	8.19867	7.86853	7.33492	6.75139	8.01988	7.91271	8.08775	8.16065	7.66997	6.97581	8.18438	7.94325	8.1396	8.2177	7.65572	7.35735	8.00848	7.72426	-0.020111	0.368425	0.360755	0.065534	0.02911	-0.010051	0.090811	0.076302	0.025713	-0.158891	-0.135386	-0.040592	0.051848	0.057049	-0.014248	0.381538	-0.175895	-0.218987	-0.038963	-0.019253	-0.039961	0.540429	-0.040509	-0.178395
13334251	AT1G01260	6.08366	6.35865	6.4113	6.05333	6.42395	6.18284	6.14043	6.54611	6.62357	6.43826	6.65256	6.22544	6.58824	7.33267	6.91456	6.75621	7.0704	6.70372	6.37476	7.29309	7.16188	6.67054	6.86748	6.89977	0.504572	0.974015	0.503259	0.702873	0.646443	0.520881	0.056765	0.187455	0.212267	0.384931	0.228604	0.042595	-0.213481	-0.039574	0.247315	-0.085668	-0.202914	0.196046	-0.270246	-0.227029	0.035048	-0.470599	-0.431518	0.153451
13334260	AT1G01280	3.86106	3.99301	3.88817	3.71511	3.81863	4.29089	3.68561	4.05016	3.9279	3.78619	3.85091	3.66694	3.91076	3.77614	4.00114	4.04155	3.96593	4.24628	3.83725	4.23115	4.03137	4.00707	3.96665	4.21819	0.049693	-0.216871	0.112977	0.326436	0.147307	-0.044612	-0.175456	0.057149	0.039735	0.07108	0.032283	-0.623955	-0.073503	0.455011	0.030225	-0.034476	0.000715	-0.028091	0.101953	0.397862	-0.00951	-0.105556	-0.031568	0.595864
13334264	AT1G01290	8.20009	8.21292	8.00601	7.66138	8.27358	8.10914	8.27896	8.15916	8.05667	7.91429	8.21658	8.03009	7.86125	7.71453	7.70913	7.77991	7.74712	7.92223	7.9582	7.84095	7.81252	7.63007	8.04406	7.95031	-0.338836	-0.498398	-0.296881	0.118533	-0.526459	-0.18691	0.078876	-0.053766	0.050661	0.252908	-0.057004	-0.079052	0.096949	0.126422	0.103391	-0.149837	0.296936	0.028072	0.018073	0.180188	0.05273	-0.402745	0.35394	0.107124
13334270	AT1G01300	8.79006	8.65725	8.49938	8.48318	8.13477	8.28014	8.54745	8.41529	8.46799	8.44421	8.33957	8.19808	8.59277	8.22739	8.219	8.40523	8.18729	8.24992	8.51739	8.27266	8.59161	8.58747	8.26182	8.20901	-0.197291	-0.429859	-0.280379	-0.077946	0.052519	-0.03022	-0.242617	-0.241958	-0.031387	-0.038969	0.204791	-0.082056	-0.075382	0.045269	0.372611	0.18224	0.074531	-0.040907	0.167235	0.287227	0.403998	0.221209	-0.13026	0.041149
13334274	AT1G01305	2.53265	2.31686	2.55139	2.56892	2.6116	2.43278	2.30695	2.51657	2.51657	2.54715	2.48871	2.49758	2.68841	2.81077	2.5533	2.56414	2.62292	2.51657	2.51657	2.60519	2.64096	2.51294	2.45676	2.43893	0.155753	0.493907	0.001913	-0.004775	0.01132	0.08379	-0.225698	0.199707	-0.034816	-0.021763	-0.122898	0.064803	-0.171836	-0.205585	0.087665	-0.051205	-0.166164	-0.077636	0.053862	-0.405292	0.122481	-0.029442	-0.043266	-0.142439
13334277	AT1G01310	2.94715	3.07185	3.23666	3.10423	3.11154	2.98423	3.09224	3.38547	3.09323	3.5044	3.45999	3.26753	3.77648	3.83606	3.90264	3.89471	3.83438	3.30139	3.70072	3.34197	3.53683	3.95162	3.61265	3.72107	0.829321	0.764212	0.66598	0.790483	0.722842	0.317164	0.145085	0.313626	-0.143429	0.400167	0.348445	0.283302	-0.075761	-0.494091	-0.365807	0.056907	-0.221728	0.419675	-0.220846	-0.807717	-0.222378	-0.34326	-0.570173	0.136373
13334281	AT1G01350	7.32282	7.00113	7.20263	7.07923	6.93543	7.16284	7.58352	7.04142	7.07821	7.27602	7.22119	6.96129	7.0742	7.05053	7.00371	7.03082	7.30784	6.84292	6.9209	7.08758	7.27376	7.06759	7.06127	7.07349	-0.248614	0.049401	-0.198919	-0.048404	0.37241	-0.319926	0.2607	0.040291	-0.124418	0.196791	0.285759	-0.201551	-0.153303	0.037049	0.270046	0.036767	-0.246571	0.230577	-0.414003	-0.003242	0.394464	-0.160024	-0.53233	0.432128
13334287	AT1G01355	4.31544	4.17487	3.99575	4.43072	4.15435	4.49884	4.0746	4.02654	4.14835	4.40888	4.03355	4.31105	4.64545	4.40957	4.06334	4.77824	4.55899	5.10228	4.12305	4.59479	4.87296	5.53233	4.46295	4.77888	0.330009	0.234699	0.067591	0.347517	0.404638	0.603442	-0.24084	-0.148329	0.152603	-0.021848	-0.120804	-0.187789	-0.522403	0.185217	0.809619	0.754086	-0.096034	-0.323401	-0.281563	0.333546	0.657016	0.775934	0.02477	-0.135612
13334292	AT1G01360	8.76843	8.54095	8.52421	8.62721	8.61231	8.58739	8.72968	8.41089	8.54431	8.56732	8.44502	8.21488	8.64945	8.50698	8.68797	8.77827	8.83738	8.8212	8.73747	8.51913	8.74402	8.91057	8.59233	8.54441	-0.118979	-0.033971	0.163762	0.151062	0.225073	0.23381	-0.038752	-0.130063	0.020095	-0.059896	-0.167288	-0.372508	0.08802	0.012146	0.056048	0.132299	-0.245047	-0.276786	0.126772	0.142209	0.035953	0.192195	-0.077759	0.095722
13334298	AT1G01370	6.65231	6.05692	5.78369	6.51086	6.23006	7.04604	5.83234	5.7375	5.78053	6.22224	6.4845	6.73627	6.29775	5.99711	6.21189	6.93783	6.99946	6.7919	6.51864	6.24727	6.46335	7.12054	7.10609	7.09717	-0.354555	-0.059816	0.428195	0.426975	0.769396	-0.254142	-0.81997	-0.319427	-0.003163	-0.288616	0.254441	-0.309768	0.220886	0.250158	0.251469	0.182713	0.106637	0.305271	1.04086	0.569585	0.254632	0.471329	-0.147804	0.615039
13334311	AT1G01380	6.23639	5.48766	5.65014	5.71782	6.22963	6.99026	4.83725	5.18982	5.08009	5.72649	6.72515	6.31134	4.71832	4.03233	4.5388	5.12751	5.61223	5.25462	4.13504	4.61547	4.79806	4.80261	5.17132	4.84088	-1.51807	-1.45533	-1.11134	-0.590319	-0.617402	-1.73564	-1.39914	-0.297842	-0.570049	0.008663	0.495515	-0.678919	-0.583283	0.58314	0.259261	-0.324896	-0.440906	-0.413743	0.815858	0.880982	0.82931	-0.333559	-0.936421	0.265176
13334317	AT1G01410	3.01083	2.88355	2.78804	3.3478	3.08621	2.97373	2.79029	3.05942	2.93028	2.51205	2.6387	2.85751	3.47717	3.04079	3.18445	3.23423	3.24708	2.85121	2.97373	3.03008	3.55979	3.30491	2.98021	2.82668	0.466335	0.15724	0.396412	-0.11357	0.160875	-0.12252	-0.22054	0.175866	0.14224	-0.835756	-0.447508	-0.116225	-0.503437	-0.01071	0.375336	0.070681	-0.266869	-0.024526	-0.282897	-0.186576	0.233096	0.906437	0.180639	0.091699
13334319	AT1G01450	8.69441	8.53937	8.5534	8.69029	8.70368	8.08567	8.81948	8.65589	8.78425	8.59074	8.38768	8.00627	8.11733	7.8348	7.94281	7.95132	7.77054	7.51355	7.65177	7.74603	8.24317	7.67315	7.62999	6.88952	-0.57708	-0.704567	-0.610583	-0.73897	-0.933141	-0.57212	0.125072	0.116522	0.230854	-0.099545	-0.315999	-0.0794	-0.465562	-0.088773	0.300353	-0.278166	-0.140549	-0.624022	-0.590634	-0.205295	0.069499	-0.178621	0.17545	-0.544622
13334327	AT1G01460	3.47169	3.41133	3.06004	3.45214	3.51687	3.49437	3.53123	3.66954	3.64907	3.22703	3.60095	3.50609	3.52613	3.52693	3.53732	3.62741	3.58557	3.48456	3.55905	3.36357	3.67892	3.52315	3.81279	3.49437	0.054441	0.115603	0.477279	0.175279	0.068705	-0.009812	0.059535	0.25821	0.589028	-0.225104	0.084077	0.011717	0.032915	-0.163357	0.141598	-0.104264	0.227219	0.009812	-0.02662	-0.421567	-0.44743	0.12084	0.143142	-0.001905
13334339	AT1G01471	3.58559	3.37074	3.72212	3.45296	3.38514	4.00963	3.66129	3.97724	4.31341	3.72705	3.1627	4.15976	3.51281	4.32071	3.77761	3.41792	3.23462	3.36748	3.54624	3.55267	3.84588	4.09267	3.62998	3.57231	-0.072779	0.949975	0.055493	-0.03504	-0.150518	-0.642152	0.075702	0.606501	0.591292	0.274083	-0.222437	0.150127	0.033425	-0.768049	0.068271	0.674747	0.395361	0.204824	-0.042277	-1.37455	-0.523021	0.400664	0.617798	0.054697
13334341	AT1G01480	3.26941	3.42363	3.19663	3.27618	3.45382	3.39455	3.82612	3.57832	3.43547	3.36911	4.38689	5.46568	3.64683	3.79507	3.47614	3.57993	3.7603	4.01013	4.81375	4.04744	3.63069	4.49894	3.85877	5.4166	0.377428	0.371431	0.279514	0.303745	0.30648	0.615576	0.556712	0.154685	0.238841	0.09293	0.933068	2.07112	1.16692	0.252379	0.154546	0.919015	0.098465	1.40647	0.610206	0.097694	-0.084295	0.826085	-0.834603	-0.664658
13334349	AT1G01500	7.97325	8.07789	7.79718	7.20618	7.56411	7.84639	7.95695	8.12117	7.9277	7.06072	7.71521	7.84223	7.65056	7.86109	7.55848	6.6561	7.16978	7.5112	7.74623	7.91684	7.63922	6.80402	7.20857	7.73596	-0.322691	-0.216797	-0.238693	-0.550073	-0.39433	-0.335192	-0.016304	0.043285	0.130524	-0.14546	0.151098	-0.004159	0.095674	0.055753	0.080736	0.147913	0.038786	0.22476	0.111978	0.012468	-0.049788	0.293373	-0.112312	0.228919
13334354	AT1G01510	8.96806	8.90397	8.85172	9.13926	8.91548	8.8914	8.88022	8.84799	8.71974	8.80791	8.73201	8.65515	8.72865	8.72893	8.79935	8.84918	8.73606	8.71925	8.66862	8.75761	8.97876	8.7719	8.69907	8.79124	-0.239416	-0.175041	-0.052376	-0.290084	-0.17942	-0.172149	-0.087842	-0.05598	-0.131985	-0.331356	-0.183467	-0.236253	-0.060024	0.028676	0.179411	-0.077276	-0.036988	0.071983	0.027818	0.084656	0.311396	0.25408	0.146479	0.308236
13334363	AT1G01520	4.62755	4.51065	4.90992	4.63175	7.02984	6.74502	4.20541	5.02448	4.20558	4.8103	6.45539	6.97447	3.9914	4.3482	3.90225	4.91181	7.42886	7.11864	4.76053	4.59127	3.90689	4.20215	7.06577	6.72223	-0.636149	-0.162455	-1.00767	0.280062	0.399019	0.373627	-0.422139	0.51383	-0.704344	0.17855	-0.574445	0.229458	0.769129	0.243074	0.004637	-0.709655	-0.363082	-0.396413	1.19127	-0.270756	0.708981	-0.888205	0.211363	-0.625871
13334371	AT1G01540	9.78411	9.89608	9.97662	10.2746	9.89737	9.6543	9.71059	9.74274	9.74429	10.2082	9.60975	9.54294	9.37337	9.56512	9.67063	9.94202	9.53266	9.30625	9.2312	9.35119	9.49717	9.91065	9.35338	9.08637	-0.410734	-0.330967	-0.30599	-0.332543	-0.364716	-0.348048	-0.073513	-0.15334	-0.232334	-0.06634	-0.287619	-0.111361	-0.142178	-0.213924	-0.173465	-0.031367	-0.179275	-0.219878	-0.068665	-0.060584	0.058869	0.034973	0.108344	-0.108517
13334383	AT1G01550	10.0138	9.93523	9.66419	9.95077	9.95126	9.90249	9.95171	9.794	9.88111	10.0355	9.94556	9.86518	10.0361	9.96085	9.88626	9.97555	10.0881	10.1364	10.1675	10.0132	9.53282	10.0579	10.1001	9.98295	0.02237	0.025625	0.222069	0.024782	0.136883	0.233927	-0.06206	-0.141229	0.216918	0.08471	-0.005699	-0.037312	0.13139	0.052397	-0.353438	0.082398	0.01193	-0.153468	0.19345	0.193626	-0.570356	-0.002312	0.017629	-0.116156
13334389	AT1G01560	5.43996	5.0474	5.1028	5.15482	5.14434	5.40413	5.55659	5.10255	5.53449	5.32522	5.37287	6.07571	6.60435	6.24977	6.71196	6.20556	6.35099	6.46267	7.20929	6.8313	6.33382	6.93459	6.56285	6.69072	1.16439	1.20237	1.60916	1.05075	1.20665	1.05854	0.116627	0.055148	0.431689	0.170405	0.228532	0.671575	0.604945	0.581533	-0.37814	0.729026	0.211859	0.228055	0.488318	0.526385	-0.809829	0.558621	-0.016673	-0.44352
13334401	AT1G01570	5.11932	5.32286	5.36533	5.45086	5.36478	5.74624	5.19578	5.28909	4.69667	5.0596	5.26185	5.73666	5.7168	5.32409	5.19355	5.00004	5.6334	5.45444	5.19195	5.26213	5.66091	5.71823	5.18391	5.08443	0.597487	0.001228	-0.171779	-0.450813	0.268614	-0.291795	0.076468	-0.033777	-0.668658	-0.39126	-0.102931	-0.009577	-0.524856	-0.061965	0.467365	0.71819	-0.449489	-0.370016	-0.601324	-0.028188	1.13602	1.10945	-0.346558	-0.360439
13334405	AT1G01580	4.854	4.48945	4.65113	4.67338	6.09487	5.97231	5.17572	5.0576	4.1412	4.64369	5.27217	5.91234	5.22816	4.64978	4.27786	4.40366	5.36242	5.71012	5.04451	5.02998	4.36038	4.04507	5.23792	5.38519	0.374161	0.160334	-0.373261	-0.269719	-0.732453	-0.262184	0.321714	0.568154	-0.509927	-0.02969	-0.8227	-0.059962	-0.18365	0.380197	0.082519	-0.358595	-0.124499	-0.324931	-0.505364	-0.187957	0.592446	-0.328905	0.698201	-0.264969
13334415	AT1G01590	4.87018	4.12915	4.82203	6.40946	6.12095	6.48163	4.92788	4.60982	4.50106	5.75735	5.76208	5.52285	4.21038	4.29184	3.65343	4.54543	4.6219	4.98072	4.44396	4.26004	3.78451	4.80112	5.57327	4.79229	-0.659805	0.162691	-1.16859	-1.86403	-1.49905	-1.50091	0.057697	0.480668	-0.320969	-0.652106	-0.358866	-0.958777	0.23358	-0.031809	0.131081	0.25569	0.951366	-0.188431	0.175883	-0.512477	0.45205	0.907796	1.31023	0.770346
13334424	AT1G01600	4.62614	4.39535	4.26661	4.45401	4.17626	4.49803	3.82942	4.84342	3.99497	4.74902	5.56527	4.7139	3.7107	4.03594	3.73029	4.03478	4.11671	3.69012	3.65643	3.63038	4.18274	4.05834	3.76656	3.7658	-0.915447	-0.359408	-0.536319	-0.419231	-0.059546	-0.807904	-0.796721	0.448069	-0.271641	0.295011	1.38901	0.215874	-0.054271	-0.40556	0.452449	0.023568	-0.350157	0.07568	0.74245	-0.853629	0.72409	-0.271443	-1.73917	-0.140194
13334429	AT1G01630	10.5576	10.3987	10.5591	10.5699	10.8288	10.7376	10.4501	10.3404	10.4683	10.5622	10.7627	10.7497	10.6486	10.8442	10.7098	10.7954	10.8016	10.7691	10.5223	10.668	10.6046	10.6649	10.7804	10.7549	0.09098	0.44552	0.15069	0.22549	-0.02723	0.03153	-0.10749	-0.05823	-0.09079	-0.00777	-0.06614	0.01209	-0.12625	-0.17617	-0.1052	-0.13054	-0.02119	-0.01417	-0.01876	-0.11794	-0.01441	-0.12277	0.04495	-0.02626
13334437	AT1G01690	6.9715	6.79462	7.01791	6.95906	7.1211	6.78711	6.82716	6.75058	6.60994	6.69808	6.92266	6.98065	7.30323	7.17183	7.40173	7.97062	7.90536	7.74458	7.33911	7.10769	7.19522	7.89051	7.49994	7.66838	0.331732	0.377213	0.383817	1.01156	0.784258	0.957471	-0.144339	-0.04404	-0.407971	-0.260986	-0.198435	0.193543	0.035878	-0.064147	-0.206505	-0.080105	-0.40542	-0.076208	0.180217	-0.020107	0.201466	0.180881	-0.206985	-0.269751
13334454	AT1G01695	4.0472	4.21082	4.46736	4.69072	4.73151	4.58928	4.29859	4.38522	4.6348	4.36624	4.67785	4.57601	4.42995	4.5364	4.61027	4.75585	5.0595	4.88984	4.76525	4.707	4.76957	5.10247	4.53562	4.58126	0.382746	0.325581	0.142913	0.06513	0.327985	0.300558	0.25139	0.174403	0.167441	-0.324478	-0.053664	-0.013268	0.335303	0.1706	0.159298	0.346625	-0.52387	-0.308583	0.083913	-0.003803	-0.008143	0.671103	-0.470206	-0.295315
13334459	AT1G01710	9.45176	9.57418	9.63715	9.34244	9.72484	9.86014	9.61083	9.62421	9.74016	9.32162	9.89558	9.91351	10.2038	10.3722	10.4552	10.1269	10.4954	10.3304	10.1901	10.319	10.5499	10.255	10.4419	10.4967	0.752078	0.798001	0.818088	0.784498	0.770509	0.470259	0.159068	0.050035	0.103008	-0.02082	0.170735	0.053371	-0.01374	-0.05316	0.09468	0.12803	-0.05341	0.16633	-0.172808	-0.103195	-0.008328	0.14885	-0.224145	0.112959
13334478	AT1G01720	7.11597	6.05956	6.61228	7.05715	7.78152	7.96129	7.13274	6.65942	6.74567	7.53524	7.79871	8.13937	6.95046	6.53294	6.93349	7.22082	7.60887	7.76935	7.80852	7.18784	7.47685	7.78142	7.60649	8.19944	-0.165504	0.473387	0.321211	0.163669	-0.172654	-0.191944	0.016778	0.599861	0.133397	0.478091	0.017188	0.178081	0.858059	0.654896	0.54336	0.560604	-0.002383	0.430089	0.841281	0.055035	0.409963	0.082513	-0.019571	0.252008
13334484	AT1G01730	7.87591	7.52576	7.57504	7.94769	7.40104	7.57294	7.99751	7.72752	7.80196	7.89276	7.42266	7.66724	8.45333	8.0231	7.9428	8.34384	8.17139	8.19193	8.43411	8.36566	8.22385	8.51598	8.21227	8.42099	0.577419	0.497337	0.367757	0.396155	0.770346	0.618996	0.121592	0.201757	0.226913	-0.054932	0.021615	0.094306	-0.019228	0.342563	0.281045	0.172137	0.04088	0.229063	-0.14082	0.140806	0.054132	0.227069	0.019265	0.134757
13334490	AT1G01750	6.86271	6.43196	6.80754	7.10753	7.15444	6.36965	6.63185	6.82621	6.46632	6.87475	6.64726	6.37396	7.32608	7.62912	7.21906	7.63281	7.31851	7.29554	7.09446	7.08436	7.38706	7.24457	7.27173	7.33262	0.463366	1.19717	0.411525	0.525281	0.164074	0.925899	-0.230861	0.394256	-0.341215	-0.232774	-0.50718	0.004313	-0.231616	-0.544767	0.168002	-0.388236	-0.046783	0.03708	-0.000755	-0.939023	0.509217	-0.155462	0.460397	0.032767
13334495	AT1G01770	8.8643	8.95602	8.80722	8.74016	8.88792	8.59565	8.81115	8.95924	8.71826	8.61308	8.78309	8.61205	9.05096	9.10335	8.82484	8.70661	8.9773	8.28505	9.05213	9.02438	8.98263	8.66185	8.41923	8.3891	0.186655	0.147324	0.017615	-0.033546	0.089385	-0.310593	-0.053154	0.003222	-0.088961	-0.127075	-0.104825	0.016409	0.001166	-0.078964	0.157793	-0.044766	-0.558068	0.104048	0.05432	-0.082186	0.246754	0.082309	-0.453243	0.087639
13334511	AT1G01780	7.34874	7.60873	7.52129	7.08487	7.31013	7.12723	7.44651	7.44573	7.48279	7.24526	7.12633	6.97141	6.80204	7.21589	7.18201	7.24669	7.01823	7.10755	7.50826	7.54089	7.58269	7.34498	7.06463	6.98197	-0.5467	-0.392844	-0.339274	0.161821	-0.291893	-0.019688	0.097771	-0.163002	-0.038498	0.16039	-0.183795	-0.155827	0.706218	0.324998	0.400678	0.098289	0.046394	-0.125571	0.608447	0.488	0.439176	-0.062101	0.230189	0.030256
13334518	AT1G01790	8.61448	8.03333	8.56103	8.88249	9.11565	9.08946	8.56124	8.07789	8.30571	8.8063	8.81939	8.62298	8.71422	7.9194	8.28993	8.97448	9.01275	8.85702	8.35827	7.5918	8.45776	8.89095	8.70205	8.36671	0.099741	-0.113922	-0.271096	0.091998	-0.102901	-0.232443	-0.053237	0.044564	-0.255312	-0.07619	-0.296263	-0.466482	-0.355943	-0.327609	0.167832	-0.083531	-0.310703	-0.490307	-0.302706	-0.372173	0.423144	-0.007341	-0.01444	-0.023825
13334537	AT1G01800	10.5108	10.3216	10.4316	10.6325	10.6618	10.5391	10.5668	10.4594	10.5613	10.4612	10.5391	10.5391	10.6795	10.3228	10.5241	10.604	10.6845	10.6731	10.6205	10.5912	10.5448	10.8118	10.6131	10.6892	0.16861	0.00123	0.09244	-0.02848	0.02269	0.13393	0.05599	0.13784	0.12967	-0.17125	-0.12264	0	-0.059	0.26839	0.02075	0.2078	-0.07138	0.0161	-0.11499	0.13055	-0.10892	0.37905	0.05126	0.0161
13334545	AT1G01810	4.21933	4.3083	4.68012	4.41638	4.33164	4.44518	4.65771	4.28702	5.19732	4.15669	4.37673	4.27801	4.29695	5.25922	4.66278	5.0518	4.5421	4.30361	4.81354	5.27731	5.19522	4.39611	4.60301	5.17049	0.077617	0.950923	-0.017337	0.635422	0.210466	-0.14157	0.438384	-0.021278	0.517208	-0.259693	0.045091	-0.167173	0.516591	0.018092	0.532445	-0.655686	0.060913	0.866884	0.078207	0.03937	0.015237	-0.395993	0.015822	1.03406
13334548	AT1G01840	6.26324	6.64347	6.34627	6.52915	6.93824	6.88727	6.12548	6.43303	6.31869	6.45808	6.64524	6.25861	6.11381	5.77612	6.08592	6.12049	6.35333	6.96964	6.12116	6.30309	5.69762	6.48252	6.30309	6.22219	-0.149427	-0.867354	-0.26035	-0.408661	-0.584911	0.082369	-0.137756	-0.210449	-0.027578	-0.07107	-0.293	-0.628668	0.00735	0.526964	-0.388298	0.362022	-0.050241	-0.747453	0.145106	0.737413	-0.36072	0.433092	0.242759	-0.118785
13334552	AT3G50840	6.05403	7.05934	6.81838	6.43728	7.07378	6.75958	6.68326	6.8723	5.85088	6.41953	6.78615	6.81047	6.60494	5.86453	6.40697	6.15657	6.27647	6.00258	6.00079	6.10011	6.58063	5.82997	6.49336	6.00886	0.55091	-1.19481	-0.411405	-0.280711	-0.797311	-0.757003	0.629236	-0.187033	-0.967498	-0.017749	-0.287637	0.05089	-0.604148	0.235575	0.173656	-0.326603	0.216888	0.006283	-1.23338	0.422608	1.14115	-0.308854	0.504525	-0.044607
13334554	AT1G01900	6.72786	6.48867	6.68509	7.42886	7.08276	7.50173	6.60266	6.63111	6.66141	7.09922	7.2833	7.27229	6.76664	6.73436	6.75844	7.12365	7.3789	7.30834	6.38958	6.57837	6.73038	6.95398	6.69029	6.9896	0.038785	0.245696	0.073352	-0.305205	0.29614	-0.19339	-0.125195	0.142446	-0.023673	-0.329632	0.200535	-0.229439	-0.377064	-0.155994	-0.028062	-0.169669	-0.68861	-0.318737	-0.251869	-0.29844	-0.004389	0.159963	-0.889145	-0.089298
13334558	AT1G01920	8.47341	8.66348	8.62515	8.62774	8.00956	7.99474	8.46489	8.52468	8.69954	8.48123	8.03836	7.71044	8.51135	8.80554	8.60504	8.22187	8.05199	8.01364	8.68616	8.61104	8.69778	8.29837	8.20871	7.84955	0.037937	0.142059	-0.020118	-0.40587	0.042426	0.018895	-0.008523	-0.138805	0.074391	-0.146503	0.028792	-0.284296	0.174811	-0.1945	0.092741	0.076505	0.156722	-0.164084	0.183334	-0.055695	0.01835	0.223008	0.12793	0.120212
13334578	AT1G01940	9.18598	9.06564	9.12073	9.21299	9.02474	8.87884	8.99464	9.27092	9.23015	8.89851	8.98511	8.74587	9.1133	9.18837	9.20385	9.13011	9.25167	9.16856	9.11456	9.37704	9.54474	9.24173	9.15557	9.09806	-0.072684	0.122732	0.083119	-0.08288	0.226926	0.28972	-0.191348	0.205284	0.109425	-0.314488	-0.039628	-0.132971	0.001257	0.188671	0.340891	0.111615	-0.096095	-0.070504	0.192605	-0.016613	0.231466	0.426103	-0.056467	0.062467
13334585	AT1G01950	7.56947	7.69551	7.83769	7.93585	7.84874	7.68346	7.39705	7.68301	7.71727	7.9007	7.65957	7.42223	7.76434	8.00338	7.90718	7.95809	8.01535	7.90674	7.50644	7.79008	7.8215	7.97282	7.73691	7.92162	0.194869	0.307867	0.06949	0.022239	0.166611	0.223285	-0.172412	-0.012501	-0.120415	-0.035158	-0.189167	-0.26123	-0.2579	-0.213299	-0.085678	0.014723	-0.278442	0.014882	-0.085488	-0.200798	0.034737	0.049881	-0.089275	0.276112
13334609	AT1G01970	8.6814	8.73115	8.83874	8.97686	8.71157	8.92271	8.63392	8.55296	8.62471	8.89922	8.5929	8.19426	8.66372	8.71218	8.94189	8.99833	8.75472	8.92567	8.70968	8.80386	8.71414	9.12552	8.69979	8.9755	-0.017681	-0.01897	0.103147	0.021463	0.043153	0.002962	-0.04748	-0.178188	-0.214031	-0.077648	-0.118669	-0.728446	0.04596	0.091686	-0.227752	0.127188	-0.054937	0.049832	0.09344	0.269874	-0.013721	0.204836	0.063732	0.778278
13334614	AT1G02000	6.82683	6.79755	6.72809	7.02409	6.91392	6.9167	6.68016	6.67047	6.73583	6.86925	6.70184	6.65914	7.48327	7.26353	7.19475	7.54411	7.19825	7.28523	7.40459	7.13876	7.30769	7.46045	6.93299	7.01498	0.656443	0.465982	0.466661	0.520016	0.284327	0.368526	-0.146666	-0.127081	0.007737	-0.154846	-0.21208	-0.25756	-0.078675	-0.12477	0.112935	-0.083653	-0.265255	-0.270251	0.067991	0.002311	0.105198	0.071193	-0.053175	-0.012691
13334618	AT1G02010	6.93598	7.29011	7.19222	7.64246	7.44787	7.17719	6.97626	7.22556	7.01968	7.49408	7.46594	7.03872	7.70276	7.74387	7.86867	8.15005	7.86479	7.76971	7.50736	7.61864	8.05498	7.8794	7.70047	7.46933	0.766787	0.453759	0.676452	0.507588	0.416924	0.592521	0.040287	-0.064551	-0.172535	-0.148378	0.018075	-0.13847	-0.195399	-0.125223	0.186312	-0.270647	-0.164323	-0.300375	-0.235686	-0.060672	0.358847	-0.122269	-0.182398	-0.161905
13334642	AT1G02065	5.956	5.10041	4.73151	4.97557	4.65537	4.48195	5.46464	4.82471	4.61741	4.7862	5.03252	4.86529	5.40609	5.73945	5.4914	5.44381	5.90983	4.88781	5.37872	5.58813	5.29337	5.07431	4.9411	4.61365	-0.549904	0.639039	0.759885	0.468235	1.25446	0.405858	-0.491352	-0.275699	-0.114104	-0.189375	0.377157	0.383337	-0.02737	-0.151322	-0.198028	-0.369503	-0.968733	-0.274153	0.463982	0.124377	-0.083924	-0.180128	-1.34589	-0.65749
13334650	AT1G02074	4.73574	5.98734	6.2991	4.74298	5.12454	5.74415	5.50747	6.03425	4.30363	4.83154	5.07277	6.43961	5.18156	4.94078	4.67166	4.68971	4.51329	5.10576	5.17665	4.66341	4.76227	3.61839	5.01795	4.20824	0.445813	-1.04656	-1.62743	-0.053274	-0.611256	-0.638388	0.771727	0.046918	-1.99547	0.08856	-0.051769	0.695463	-0.004906	-0.277369	0.090608	-1.07132	0.504661	-0.897521	-0.776633	-0.324287	2.08607	-1.15988	0.55643	-1.59298
13334652	AT1G02080	9.91577	10.0573	9.96843	9.91926	9.90739	9.87368	9.95829	10.0407	9.97638	9.96031	9.84034	9.92252	10.1826	10.2798	10.2678	10.1652	10.093	10.0097	10.116	10.2037	10.247	10.0435	9.94928	10.056	0.266829	0.22245	0.299366	0.245946	0.185596	0.136038	0.042518	-0.01659	0.00795	0.041048	-0.067058	0.048837	-0.06656	-0.07605	-0.02076	-0.12167	-0.143712	0.0463	-0.109078	-0.05946	-0.02871	-0.162718	-0.076654	-0.002537
13334703	AT1G02100	10.1737	10.2729	10.2644	10.3605	10.2529	10.0753	10.2916	10.2903	10.4268	10.3064	10.1432	10.1161	10.0942	10.1717	10.4092	10.3813	10.2844	10.1969	10.2481	10.3092	10.3863	10.3846	10.4404	10.2562	-0.0795	-0.10114	0.14481	0.02081	0.03147	0.12164	0.11798	0.01748	0.16243	-0.05415	-0.10969	0.04076	0.1539	0.13752	-0.02289	0.00333	0.15603	0.05931	0.03592	0.12004	-0.18532	0.05748	0.26572	0.01855
13334720	AT1G02110	6.90675	6.92048	7.17008	7.69288	7.17286	6.74278	6.96887	6.92762	6.95957	7.65357	6.86566	6.43229	7.05279	7.02377	7.31968	7.63022	7.25225	6.75759	6.88752	6.93833	7.04228	7.46529	7.00179	6.6895	0.146048	0.103286	0.149601	-0.062653	0.079385	0.014813	0.06212	0.007134	-0.21051	-0.039312	-0.307199	-0.310492	-0.165272	-0.085441	-0.277401	-0.164931	-0.250454	-0.06809	-0.227392	-0.092575	-0.066891	-0.125619	0.056745	0.242402
13334726	AT1G02120	9.75592	9.4522	9.37373	9.72137	9.59232	9.60382	9.75001	9.55895	9.5374	9.91779	9.78071	9.96143	10.0769	9.67672	9.9185	10.2327	10.1716	9.92141	9.99629	9.86765	9.79047	10.1075	10.2414	10.096	0.320929	0.224525	0.544773	0.511362	0.579269	0.317593	-0.005911	0.106753	0.163679	0.196422	0.188387	0.357617	-0.080558	0.190927	-0.128033	-0.1252	0.06976	0.174561	-0.074647	0.084174	-0.291712	-0.321622	-0.118627	-0.183056
13334745	AT1G02145	8.44618	8.67924	8.70469	8.73039	8.59368	8.51008	8.52821	8.61986	8.81656	8.57934	8.65277	8.52825	9.08957	9.22365	9.36621	9.1548	9.35202	9.12723	9.23775	9.43202	9.45928	9.3224	9.36888	9.1417	0.643389	0.544408	0.661516	0.42441	0.758346	0.617156	0.082033	-0.059387	0.111865	-0.151054	0.059091	0.018173	0.148181	0.208369	0.093071	0.167597	0.016857	0.014472	0.066148	0.267756	-0.018794	0.318651	-0.042234	-0.003701
13334767	AT1G02150	8.09728	8.30699	7.97865	8.13107	8.05686	8.15884	8.04876	8.1533	8.00448	8.06358	7.91695	7.64257	8.16486	8.17912	8.15676	8.1627	8.13611	8.35441	8.17931	8.37379	8.24096	8.36637	8.23643	8.22887	0.067575	-0.127869	0.178112	0.031629	0.079249	0.195566	-0.048523	-0.153687	0.025832	-0.067492	-0.139913	-0.516278	0.014451	0.194667	0.084195	0.203668	0.100318	-0.125545	0.062974	0.348354	0.058363	0.27116	0.240231	0.390733
13334772	AT1G02160	10.0918	10.0416	10.0604	9.85434	9.78157	9.62313	10.1098	10.0624	10.097	9.83407	9.66831	9.35052	10.0024	10.3006	10.0151	9.70815	9.6575	9.82897	10.0921	10.1953	10.2696	9.77418	9.93574	9.73766	-0.08945	0.25901	-0.04528	-0.146189	-0.124074	0.20584	0.01799	0.02081	0.03663	-0.020269	-0.113261	-0.272608	0.08977	-0.10528	0.25449	0.066031	0.278243	-0.091312	0.07178	-0.12609	0.21786	0.0863	0.391504	0.181296
13334779	AT1G02170	10.5544	10.3051	10.0966	10.3216	10.2688	10.0745	10.5197	10.4028	10.2412	10.4299	10.3033	10.3437	10.7035	10.4212	10.4654	10.4425	10.4908	10.3963	10.9383	10.5666	10.6032	10.596	10.6121	10.5954	0.14907	0.11607	0.36882	0.12093	0.22201	0.32174	-0.03467	0.09767	0.14465	0.10829	0.03446	0.26913	0.23479	0.14544	0.13781	0.15342	0.12133	0.19911	0.26946	0.04777	-0.00684	0.04513	0.08687	-0.07002
13334787	AT1G02190	4.97808	5.04403	5.02821	4.96577	4.94435	5.33939	4.50728	4.84466	4.75438	4.93299	4.84802	5.15656	4.83064	4.58962	4.85385	5.18715	5.19731	5.18333	5.10669	4.84802	4.8772	4.80161	5.3655	5.05413	-0.147438	-0.45441	-0.174357	0.221373	0.25296	-0.156067	-0.470801	-0.199373	-0.273832	-0.03278	-0.096326	-0.18283	0.276051	0.258399	0.02335	-0.385532	0.168192	-0.129195	0.746852	0.457772	0.297182	-0.352752	0.264518	0.053635
13334797	AT1G02205	9.33429	8.71753	9.12335	8.78775	9.27964	10.597	8.49337	8.27386	8.34251	8.06278	9.46362	9.95793	8.20757	8.45857	8.78039	8.02144	9.07498	9.53197	7.60757	7.78753	8.34653	7.65155	8.345	9.21083	-1.12672	-0.258961	-0.342952	-0.76631	-0.204664	-1.06506	-0.840923	-0.443677	-0.780836	-0.72497	0.183973	-0.6391	-0.599998	-0.671043	-0.433861	-0.369894	-0.729981	-0.321136	0.240925	-0.227366	0.346975	0.355076	-0.913954	0.317964
13334812	AT1G02300	9.69048	10.1112	9.79693	8.85482	9.28621	9.17945	9.46668	9.73535	9.99349	9.05009	9.24861	8.99006	9.89581	10.1592	10.2822	9.61968	9.46668	9.39337	9.94217	10.352	9.8696	9.81136	9.39539	9.29296	0.20533	0.04795	0.485238	0.764857	0.180468	0.21392	-0.223803	-0.375871	0.196557	0.195268	-0.037596	-0.189391	0.04636	0.19284	-0.41257	0.191681	-0.071285	-0.10041	0.270163	0.568711	-0.609127	-0.003587	-0.033689	0.088981
13334821	AT1G02305	8.45628	8.72866	8.73726	8.74752	8.66294	8.75081	8.58828	8.74526	8.71649	8.73498	8.67133	8.67136	8.38746	8.59754	8.80819	8.77019	8.64612	8.48674	8.50484	8.55804	8.5967	8.86746	8.63765	8.77258	-0.068816	-0.13112	0.070932	0.022667	-0.016819	-0.264072	0.132005	0.016599	-0.020769	-0.012538	0.008388	-0.079449	0.117382	-0.039501	-0.211492	0.097272	-0.008471	0.285841	-0.014623	-0.0561	-0.190723	0.10981	-0.016859	0.36529
13334831	AT1G02320	4.36445	4.30439	3.89701	4.64371	4.77474	3.80362	3.96529	4.25856	4.75494	4.92268	4.95898	4.40877	4.34672	4.64371	4.9077	5.03041	4.15368	4.4797	4.67602	5.27285	5.67699	4.74817	5.24469	4.64371	-0.017732	0.339321	1.0107	0.386697	-0.621062	0.676079	-0.399163	-0.045829	0.85793	0.278963	0.184237	0.605156	0.329297	0.629133	0.769285	-0.282245	1.09101	0.164019	0.72846	0.674962	-0.088645	-0.561208	0.906774	-0.441137
13334833	AT1G02350	5.57111	5.36838	5.0339	4.78	6.1198	4.99616	5.50514	4.9894	4.76528	4.40954	4.79342	4.33822	5.81078	5.56508	5.08808	5.08487	5.71602	4.96969	5.14773	5.55356	4.79668	4.57369	5.33254	4.72517	0.239668	0.196704	0.054183	0.304869	-0.403783	-0.026468	-0.065969	-0.378973	-0.268621	-0.370458	-1.32638	-0.657935	-0.663048	-0.011521	-0.2914	-0.511187	-0.38348	-0.244521	-0.597079	0.367452	-0.022779	-0.140729	0.942905	0.413414
13334838	AT1G02370	8.54485	8.56278	8.57944	8.37932	7.95751	7.86481	8.47085	8.75942	8.62092	8.3092	8.10731	8.09243	8.49718	8.54376	8.30309	7.94484	7.82681	8.37867	8.28497	8.5387	8.46475	7.7538	7.95974	8.17783	-0.047666	-0.01902	-0.276351	-0.434479	-0.130705	0.513862	-0.073998	0.196643	0.04148	-0.070115	0.1498	0.227622	-0.212211	-0.005055	0.161664	-0.191034	0.132934	-0.200839	-0.138213	-0.201698	0.120184	-0.120919	-0.016866	-0.428461
13334842	AT1G02380	7.04494	6.5881	6.42638	5.81766	6.21667	5.8293	7.29427	7.03507	5.6334	6.30545	5.94609	5.21323	6.8609	6.28173	5.53871	6.01273	6.19807	6.11073	6.1199	5.9403	5.4285	5.46641	5.81389	5.57147	-0.184038	-0.306363	-0.887668	0.195064	-0.018599	0.281428	0.249335	0.446976	-0.792986	0.487782	-0.270583	-0.616069	-0.740999	-0.341432	-0.110212	-0.546322	-0.384181	-0.539258	-0.990334	-0.788408	0.682774	-1.0341	-0.113598	0.076811
13334849	AT1G02390	7.56943	7.60865	8.01492	7.74714	8.71276	9.80141	8.05066	7.73361	8.06865	8.06297	8.98927	9.77631	8.7959	8.35784	8.97254	8.72191	9.12382	9.74122	9.4429	8.8676	8.5796	8.76159	9.21406	10.2234	1.22647	0.749194	0.957617	0.974767	0.411068	-0.06019	0.48123	0.124962	0.053727	0.315823	0.276519	-0.025096	0.647007	0.509761	-0.392941	0.039684	0.090236	0.482235	0.165777	0.384799	-0.446668	-0.276139	-0.186283	0.507331
13334854	AT1G02400	6.91321	6.07481	5.48069	5.69412	5.13872	5.28106	6.87616	6.16922	5.98481	5.92391	5.3174	5.3055	7.59208	6.50422	5.9019	5.77028	5.50923	5.3828	8.06973	6.918	6.06292	6.07615	5.2611	6.04154	0.67887	0.429409	0.42121	0.076168	0.370508	0.101733	-0.037044	0.094404	0.504126	0.229791	0.178682	0.024438	0.477649	0.413776	0.161023	0.305871	-0.248125	0.658745	0.514693	0.319372	-0.343103	0.07608	-0.426807	0.634307
13334860	AT1G02410	9.43534	9.26903	9.39441	9.40384	9.61039	9.616	9.43988	9.37686	9.30255	9.51839	9.61282	9.69695	9.32816	9.08217	9.086	9.14346	9.58674	9.58667	9.57325	9.34335	9.31075	9.4731	9.52983	9.59889	-0.107182	-0.186861	-0.308408	-0.260383	-0.023642	-0.029326	0.004536	0.107827	-0.091861	0.114555	0.002435	0.080945	0.245088	0.261177	0.224751	0.329648	-0.056914	0.012213	0.240552	0.15335	0.316612	0.215093	-0.059349	-0.068732
13334871	AT1G02420	7.06725	7.28633	7.3592	7.40332	7.33051	7.31851	7.44941	7.41731	7.38024	7.48317	7.23743	7.37514	7.13021	7.12247	7.47437	7.58791	7.32168	7.37139	7.34208	7.12414	7.40111	7.56306	7.29886	7.22006	0.062961	-0.163858	0.115167	0.184599	-0.008825	0.052875	0.382156	0.130979	0.021035	0.079856	-0.093075	0.056629	0.211862	0.001671	-0.073262	-0.024854	-0.022822	-0.151324	-0.170294	-0.129308	-0.094297	-0.10471	0.070253	-0.207953
13334873	AT1G68970	5.85211	6.39773	6.21503	5.98034	6.1319	6.40098	6.15064	6.70344	6.18629	5.99104	5.87191	6.26085	6.19186	5.7767	5.98034	5.97147	5.83574	5.89566	6.03155	5.8652	5.45686	5.57572	5.83052	5.34391	0.339742	-0.621034	-0.234684	-0.00888	-0.29616	-0.505321	0.298525	0.305706	-0.028742	0.010694	-0.259989	-0.140126	-0.160308	0.088507	-0.523488	-0.395747	-0.005226	-0.551754	-0.458833	-0.217199	-0.494746	-0.406441	0.254763	-0.411628
13334875	AT1G02490	3.37189	3.87664	3.53797	4.04301	4.18017	3.97679	4.441	5.42523	4.13847	3.89516	3.8661	4.03789	4.53347	3.73189	4.58049	4.55324	4.60748	4.26123	4.12429	4.35939	4.09984	4.9474	4.47968	4.75711	1.16158	-0.144751	1.04252	0.51023	0.42731	0.284441	1.06911	1.54859	0.600502	-0.147845	-0.314065	0.061094	-0.409186	0.627502	-0.480655	0.394158	-0.127802	0.495872	-1.47829	-0.921088	-1.08116	0.542003	0.186263	0.434778
13334877	AT1G02500	11.2148	11.278	11.3883	11.3979	11.3463	11.2153	11.2939	11.2434	11.4859	11.4918	11.3987	11.4914	11.4364	11.5638	11.6867	11.598	11.6784	11.6489	11.6014	11.7208	11.5237	11.7081	11.7733	11.7363	0.22161	0.28585	0.29837	0.20006	0.33207	0.43354	0.07905	-0.03454	0.09764	0.09388	0.05238	0.27611	0.16496	0.15695	-0.16294	0.11017	0.09493	0.08741	0.08591	0.19149	-0.26058	0.01629	0.04255	-0.1887
13334881	AT1G02520	2.62563	2.9619	2.55388	3.21033	2.43489	3.71329	3.20659	2.49308	2.9516	3.30324	3.27299	3.52854	3.33272	4.50907	3.0611	3.98067	4.01151	3.18846	4.18649	3.76467	3.07811	4.14665	3.68754	3.64706	0.707096	1.54717	0.507227	0.770344	1.57662	-0.52483	0.58096	-0.468813	0.397728	0.092911	0.838101	-0.184749	0.85377	-0.744393	0.01701	0.165975	-0.323966	0.458599	0.27281	-0.27558	-0.380718	0.073064	-1.16207	0.643348
13334891	AT1G02530	3.13094	3.28104	3.59139	3.47444	3.12164	3.99426	3.08008	3.99382	3.03382	3.59716	3.20955	3.44966	3.29816	3.00765	3.73369	3.30586	3.12385	3.12812	3.40835	3.70173	3.12921	3.77266	4.0049	2.9021	0.167225	-0.273392	0.142299	-0.168576	0.002203	-0.866134	-0.050853	0.712781	-0.557573	0.12272	0.087908	-0.544593	0.110192	0.694076	-0.604485	0.466796	0.881052	-0.226027	0.161045	-0.018705	-0.046912	0.344076	0.793144	0.318566
13334902	AT1G02550	4.16482	4.6221	4.29654	4.42568	4.28714	4.52424	4.44179	4.19961	4.49221	4.47278	3.91364	4.15367	4.23866	4.71374	4.48732	4.48778	4.46324	4.70163	4.71624	4.81485	4.23922	4.82619	4.46037	4.43448	0.073839	0.091646	0.190778	0.062108	0.176106	0.177387	0.276967	-0.422492	0.195667	0.047108	-0.373493	-0.370566	0.477585	0.101103	-0.248099	0.338406	-0.002875	-0.267144	0.200618	0.523595	-0.443766	0.291298	0.370618	0.103422
13334904	AT1G02560	10.5106	10.6552	10.5148	10.2247	10.4389	10.7005	10.4581	10.5499	10.6687	10.3061	10.522	10.5956	10.556	10.6398	10.5895	10.3561	10.5515	10.6784	10.5126	10.6815	10.626	10.4316	10.5873	10.678	0.04543	-0.01545	0.07472	0.13137	0.1126	-0.02215	-0.05245	-0.10534	0.15388	0.08141	0.08305	-0.10492	-0.04343	0.04175	0.03648	0.07556	0.03579	-0.0004	0.00902	0.14709	-0.1174	-0.00585	-0.04726	0.10452
13334916	AT1G02570	3.60373	4.38235	4.91698	4.27989	4.07701	4.17499	4.13538	4.2218	4.1361	4.0679	4.57294	4.29336	4.19749	3.89201	4.25497	4.36095	4.16177	4.10195	4.73671	4.23357	4.08124	4.08744	4.18352	4.42543	0.593769	-0.490335	-0.662008	0.081058	0.08476	-0.073041	0.531658	-0.160545	-0.780878	-0.211995	0.495923	0.118375	0.539211	0.341562	-0.173736	-0.273508	0.021746	0.323477	0.007553	0.502107	0.607142	-0.061513	-0.474177	0.205102
13334919	AT1G02575	2.56498	3.15361	2.85205	2.50337	2.46102	2.44378	2.30231	3.0681	2.5356	2.65393	2.6387	2.58294	3.32198	2.69773	2.76822	3.1977	2.69773	2.46004	2.81996	2.4846	2.69773	2.58355	2.5667	2.45953	0.756993	-0.455874	-0.083829	0.694327	0.236707	0.016254	-0.262672	-0.085509	-0.316447	0.150558	0.177672	0.139159	-0.502016	-0.21313	-0.070487	-0.614149	-0.131034	-0.000507	-0.239344	-0.127621	0.24596	-0.764707	-0.308706	-0.139666
13334922	AT1G02580	4.51244	4.75612	4.30031	3.8672	4.6037	4.00539	4.02351	5.45192	4.58477	4.08535	4.46053	4.71831	4.81826	4.83589	5.12175	5.42248	5.06155	4.77561	4.46515	5.16357	5.26741	4.99615	4.56628	6.03096	0.305825	0.079771	0.821442	1.55528	0.457845	0.770222	-0.488932	0.6958	0.284458	0.21815	-0.143171	0.712918	-0.353115	0.327675	0.145656	-0.426332	-0.495266	1.25535	0.135817	-0.368125	-0.138802	-0.644482	-0.352095	0.542434
13334940	AT1G07760	5.22857	4.82089	5.54826	5.24875	5.24021	5.37484	4.89471	5.14734	4.38366	4.8772	5.34757	5.34358	4.85412	4.78083	5.17383	4.61843	5.27405	5.16273	4.73787	4.89471	4.46256	4.46227	5.02888	4.80123	-0.374454	-0.040064	-0.374426	-0.630316	0.033837	-0.212114	-0.333864	0.326447	-1.1646	-0.371546	0.107365	-0.031259	-0.116251	0.113884	-0.711277	-0.156159	-0.245163	-0.361495	0.217613	-0.212563	0.453319	0.215387	-0.352528	-0.330236
13334942	AT1G02620	8.18742	7.26847	5.87648	4.93857	6.84873	4.79889	8.26916	7.71029	5.7883	5.35363	5.2639	4.91886	7.97724	7.25795	6.44759	6.69472	6.65795	4.81919	7.38694	7.37478	6.40974	5.29207	6.04689	4.1317	-0.210183	-0.01052	0.571116	1.75615	-0.190772	0.020307	0.081737	0.441821	-0.088176	0.415065	-1.58482	0.119968	-0.590294	0.116831	-0.03785	-1.40265	-0.61106	-0.687494	-0.672031	-0.32499	0.050326	-1.81771	0.973764	-0.807462
13334945	AT1G02640	9.62759	8.28167	7.69803	8.23554	8.0609	6.99674	9.44037	8.02948	7.75882	7.86646	7.22915	6.07368	9.16462	8.24499	7.71014	7.85069	7.96228	6.88493	8.91457	8.14904	7.21182	7.76649	7.01065	6.36046	-0.462963	-0.036676	0.012117	-0.384844	-0.09862	-0.111809	-0.187213	-0.252185	0.060795	-0.369082	-0.83175	-0.923059	-0.250053	-0.095949	-0.498326	-0.0842	-0.951631	-0.524469	-0.06284	0.156236	-0.559121	0.284882	-0.119881	0.39859
13334953	AT1G02650	6.17412	5.35032	5.03901	5.21691	5.0811	4.61479	5.17855	5.11216	5.22758	5.21242	4.83551	4.20537	5.65886	4.7554	4.95763	4.92829	4.83421	4.85046	6.01817	5.73627	5.23929	5.00724	4.99139	4.66449	-0.515252	-0.594926	-0.081374	-0.288614	-0.246887	0.235679	-0.995567	-0.238163	0.188571	-0.004488	-0.245589	-0.409414	0.359304	0.980867	0.281658	0.078948	0.157183	-0.185974	1.35487	1.21903	0.093087	0.083436	0.402772	0.22344
13334957	AT1G02670	4.18242	4.4295	3.85079	3.95169	3.88834	3.90035	4.37962	3.88329	4.00946	3.76402	4.4824	4.36668	4.85457	4.59393	4.49792	4.09884	4.55711	4.72713	4.41292	4.14516	4.5328	4.38903	5.01176	4.71498	0.672145	0.164425	0.647129	0.147144	0.668771	0.826775	0.197196	-0.546219	0.158674	-0.187677	0.594061	0.466327	-0.441642	-0.448767	0.03488	0.290191	0.454653	-0.012151	-0.638838	0.097452	-0.123794	0.477868	-0.139408	-0.478478
13334973	AT1G02680	10.3279	10.1164	10.0632	9.90069	9.98499	10.0727	10.3341	10.1832	10.0263	9.83069	9.96825	10.0075	9.76439	9.72918	9.6956	9.52051	9.63587	9.8129	9.957	9.9103	9.6623	9.74798	9.75964	9.81805	-0.563525	-0.387213	-0.36764	-0.380173	-0.34912	-0.259757	0.00619	0.06685	-0.03695	-0.069999	-0.016737	-0.06512	0.192618	0.18112	-0.033295	0.227469	0.123778	0.005144	0.186428	0.11427	0.003655	0.297468	0.140515	0.070264
13334981	AT1G02690	6.77952	6.35916	6.64649	6.51388	6.60405	6.55597	6.73249	6.51208	6.13299	6.18713	6.19911	5.61529	6.88137	6.41782	6.1882	6.46484	6.34042	6.56886	6.48248	6.31323	6.35549	6.54906	6.44123	6.57376	0.101845	0.058662	-0.45828	-0.049037	-0.263628	0.012889	-0.047029	0.152921	-0.513497	-0.326749	-0.404939	-0.94068	-0.39889	-0.104584	0.167283	0.084223	0.100805	0.004905	-0.351861	-0.257505	0.68078	0.410972	0.505744	0.945585
13334994	AT1G02700	4.71661	4.75949	4.70405	5.02364	4.96191	4.51617	4.91364	4.97195	4.89935	4.94168	4.82382	4.81684	4.7525	5.31515	5.55043	5.09212	5.23398	4.86165	4.76506	5.43964	5.6993	4.99283	4.69359	4.79688	0.035891	0.555656	0.846379	0.068481	0.272071	0.345477	0.197028	0.212457	0.195296	-0.081965	-0.138098	0.300675	0.012561	0.124492	0.148867	-0.099292	-0.540399	-0.064772	-0.184467	-0.087965	-0.046429	-0.017327	-0.402301	-0.365447
13334999	AT1G02720	7.14745	7.19752	7.21421	7.41812	7.05303	6.9354	6.97153	7.00073	7.44764	7.01502	6.97479	6.93835	6.92671	6.88569	7.04852	6.89357	6.74776	6.61777	6.97879	6.83961	6.99317	6.94583	7.13586	6.23502	-0.220745	-0.311823	-0.165689	-0.524548	-0.305275	-0.317636	-0.175918	-0.196781	0.233432	-0.403096	-0.078244	0.002945	0.052079	-0.046085	-0.055348	0.052257	0.388101	-0.382748	0.227997	0.150696	-0.28878	0.455353	0.466345	-0.385693
13335005	AT1G02750	8.23319	8.05401	8.23422	8.31757	8.27242	7.98912	8.11449	8.20812	8.28863	8.41788	8.00168	8.09656	7.98545	8.25476	8.36087	8.40395	8.35208	8.28434	8.35773	8.36016	8.29074	8.73284	8.27512	8.23319	-0.247732	0.200754	0.126648	0.086385	0.079661	0.295224	-0.118698	0.154111	0.054416	0.100311	-0.270738	0.107442	0.372271	0.105398	-0.070123	0.328887	-0.076958	-0.051158	0.490969	-0.048713	-0.124539	0.228576	0.19378	-0.1586
13335014	AT1G02810	4.33481	3.99243	4.41962	4.7373	4.38848	4.45934	4.20346	4.38381	4.14588	4.29602	4.08367	3.70073	3.88286	4.03683	4.1562	4.46136	4.28185	4.37848	4.17199	4.05693	4.12127	4.13212	4.04319	4.46784	-0.451952	0.044403	-0.263417	-0.275943	-0.10663	-0.08086	-0.131354	0.391383	-0.273735	-0.44128	-0.304811	-0.75861	0.289132	0.020098	-0.034931	-0.329239	-0.238659	0.089359	0.420486	-0.371285	0.238804	0.112041	0.066152	0.847969
13335018	AT1G02813	2.63818	2.88897	2.71818	2.49251	2.6315	2.5048	2.6872	2.74467	2.51657	2.6315	2.5591	2.37267	2.78148	2.69383	2.76809	2.6315	2.85358	2.65002	2.84316	2.70587	2.76107	2.48934	2.60182	2.44595	0.143296	-0.195146	0.049912	0.138995	0.222082	0.145224	0.049018	-0.144304	-0.201605	0.138995	-0.0724	-0.132126	0.061682	0.012045	-0.007021	-0.142163	-0.25176	-0.204077	0.012664	0.156349	0.194584	-0.281158	-0.17936	-0.071951
13335022	AT1G02816	5.82956	5.46773	5.49974	5.74752	5.7021	5.43251	5.51973	5.80025	5.55994	5.67553	5.94606	5.42769	5.89285	5.78238	5.66609	5.48922	6.03589	5.83655	6.18828	6.15382	6.04428	6.03142	6.0834	6.01471	0.063289	0.314648	0.166349	-0.258298	0.333789	0.404036	-0.309827	0.332516	0.060205	-0.071988	0.243961	-0.004818	0.295436	0.371442	0.378187	0.542206	0.047514	0.178164	0.605263	0.038926	0.317982	0.614194	-0.196447	0.182982
13335026	AT1G02840	10.5712	10.4686	10.6877	10.7065	10.5302	10.3107	10.5769	10.6436	10.5302	10.7307	10.3598	10.2432	10.5499	10.5354	10.7007	10.7913	10.4658	10.4065	10.5659	10.5004	10.5538	10.7906	10.5533	10.2017	-0.02127	0.06678	0.01297	0.08486	-0.06442	0.09583	0.00573	0.17504	-0.15747	0.02428	-0.17048	-0.0675	0.01596	-0.03497	-0.14692	-0.0007	0.0875	-0.20476	0.01023	-0.21001	0.01055	-0.02498	0.25798	-0.13726
13335042	AT1G02850	6.5271	6.92601	6.97104	7.84839	7.17473	8.19267	7.09061	7.92885	8.30208	8.49054	8.49196	9.22344	6.56513	7.45427	7.5061	7.82398	7.35846	8.50137	8.036	8.21263	8.15833	8.93455	8.54541	9.26798	0.038028	0.528258	0.535059	-0.024411	0.183728	0.308702	0.563509	1.00284	1.33104	0.642147	1.31723	1.03077	1.47087	0.758361	0.652228	1.11057	1.18694	0.766612	0.907363	-0.244477	-0.678816	0.468421	-0.130285	-0.264154
13335058	AT1G02860	9.9768	9.50349	9.25987	9.78663	9.13206	8.6347	9.87738	9.52852	9.16356	9.61482	8.67931	8.17282	9.51425	9.26288	8.81863	9.16876	8.51452	8.47688	9.37822	9.19309	8.79889	9.17735	8.4093	7.83113	-0.462558	-0.240606	-0.441237	-0.617874	-0.617534	-0.157822	-0.099423	0.025029	-0.096304	-0.17181	-0.452748	-0.46188	-0.136021	-0.069792	-0.019739	0.008596	-0.105225	-0.645752	-0.036598	-0.094821	0.076565	0.180406	0.347523	-0.183872
13335067	AT1G02950	6.06519	5.93759	6.00069	6.15706	6.38543	5.80668	5.91781	5.89902	5.3047	5.84838	5.87887	5.27043	5.79659	5.67942	5.73984	5.5541	6.42383	6.09287	6.19339	5.85794	5.87959	5.84838	5.73493	5.85642	-0.268604	-0.258176	-0.260842	-0.60296	0.038406	0.286192	-0.147381	-0.038569	-0.695988	-0.30868	-0.506556	-0.536251	0.396801	0.178524	0.13975	0.29428	-0.688905	-0.236451	0.544182	0.217093	0.835738	0.60296	-0.182349	0.2998
13335071	AT1G02970	5.38944	5.68989	5.45056	5.65465	5.54591	5.60162	5.20226	5.26524	4.9915	5.21481	5.59847	5.54233	5.27796	5.34395	5.40157	5.39513	5.91437	5.81685	4.91833	4.76769	5.35121	5.10156	5.48925	5.451	-0.111482	-0.345934	-0.048989	-0.25953	0.368461	0.215231	-0.187189	-0.424646	-0.459064	-0.439842	0.05257	-0.059292	-0.359634	-0.576256	-0.050366	-0.293561	-0.425118	-0.365853	-0.172445	-0.15161	0.408698	0.146281	-0.477688	-0.306561
13335084	AT1G02980	3.07256	3.32097	2.81795	3.36386	3.66172	3.12992	3.11302	3.81137	3.31249	2.764	2.79649	2.98953	3.47649	2.51963	3.23616	3.63462	2.99214	3.13473	3.89322	2.57245	3.61317	3.73074	3.0028	3.46203	0.403934	-0.801343	0.418212	0.270761	-0.669581	0.004815	0.040465	0.490401	0.494544	-0.59986	-0.865231	-0.140385	0.416727	0.05282	0.377013	0.09612	0.010667	0.327291	0.376262	-0.437581	-0.117531	0.69598	0.875898	0.467676
13335100	AT1G03010	7.0238	6.34265	7.13812	6.95364	5.98058	5.52892	7.00318	6.67237	6.77471	6.70802	5.50461	4.80468	6.68141	5.9804	6.30035	6.83011	6.04563	5.48239	6.30733	6.15083	6.42132	6.30733	4.95017	5.23397	-0.342395	-0.362251	-0.837769	-0.123533	0.065046	-0.04653	-0.020628	0.329712	-0.363407	-0.245618	-0.475971	-0.724239	-0.374076	0.170426	0.12097	-0.522774	-1.09545	-0.248414	-0.353448	-0.159286	0.484377	-0.277156	-0.619483	0.475825
13335107	AT1G03022	3.52153	3.81804	3.34414	3.7326	3.54503	3.82184	3.81223	3.76736	3.64016	3.85601	4.02489	3.82047	4.03517	4.09966	3.96848	3.97852	3.98907	3.97146	3.71163	3.69016	3.83454	4.0961	3.70029	3.83454	0.513642	0.281623	0.624336	0.245912	0.444033	0.149619	0.290701	-0.050682	0.296019	0.123409	0.479859	-0.001367	-0.323539	-0.409502	-0.133933	0.117582	-0.288774	-0.136911	-0.61424	-0.35882	-0.429952	-0.005827	-0.768633	-0.135544
13335109	AT1G03030	8.65337	8.55977	8.67847	8.71794	8.87437	8.80993	8.55564	8.69309	8.80815	8.82521	8.93405	9.01593	8.65539	8.62316	8.84214	8.7866	8.97754	9.0173	8.79475	8.837	8.69343	8.92009	8.8847	8.94937	0.002013	0.063394	0.163666	0.068667	0.103174	0.207368	-0.097735	0.133327	0.129679	0.107273	0.059677	0.205993	0.139367	0.213839	-0.1487	0.133485	-0.092848	-0.067937	0.237102	0.080512	-0.278379	0.026212	-0.152525	-0.27393
13335122	AT1G03050	3.89301	4.63415	3.7995	4.7751	4.26495	4.31195	4.37288	4.07097	4.28583	4.10813	4.21788	4.6411	4.65543	4.11159	4.75978	4.54963	4.38154	4.70876	4.30727	4.42895	4.21131	4.56412	4.56058	5.16559	0.762418	-0.522553	0.960283	-0.225475	0.116585	0.396814	0.479869	-0.563176	0.486326	-0.666975	-0.047072	0.329152	-0.348164	0.317355	-0.548473	0.014489	0.179047	0.456831	-0.828033	0.880531	-1.0348	0.681464	0.226119	0.127679
13335128	AT1G03070	3.75322	3.96673	4.51718	4.25983	5.02266	4.87408	4.06768	4.29983	3.71911	4.19338	4.65268	4.36855	4.26426	4.62048	4.9748	4.74765	4.90651	4.43656	4.2737	4.42522	4.62578	4.43656	4.31242	4.60817	0.511033	0.653748	0.457616	0.487822	-0.116154	-0.437529	0.314457	0.333094	-0.798065	-0.066451	-0.369981	-0.505537	0.009445	-0.195264	-0.349014	-0.311094	-0.594091	0.171613	-0.305012	-0.528358	0.449051	-0.244643	-0.22411	0.67715
13335137	AT1G03090	9.73541	9.8621	9.23673	9.04733	9.6496	8.55394	10.2182	10.0982	9.11072	8.86227	8.93224	8.33888	9.5967	9.22045	9.02319	8.98012	8.96838	8.00064	9.71327	9.39354	9.04751	8.72625	8.00946	7.91087	-0.138715	-0.641641	-0.213541	-0.067204	-0.681213	-0.553298	0.482749	0.236144	-0.126018	-0.185063	-0.717363	-0.215053	0.116572	0.173088	0.02432	-0.253871	-0.958922	-0.089772	-0.366177	-0.063056	0.150338	-0.068808	-0.241559	0.125281
13335155	AT1G03103	3.52473	3.28277	3.55027	3.42059	3.55104	3.72698	3.93661	3.86999	3.55692	3.37822	3.61219	3.65709	3.65715	3.63084	3.6986	3.40832	3.70095	3.46018	4.00289	3.66972	3.57854	3.62807	3.92118	3.68283	0.132413	0.348069	0.14833	-0.012271	0.149914	-0.266799	0.411873	0.587216	0.006653	-0.042371	0.061148	-0.06989	0.345746	0.038883	-0.120057	0.219756	0.220224	0.222651	-0.066127	-0.548333	-0.12671	0.262127	0.159076	0.292541
13335160	AT1G03110	8.54193	7.92758	7.99125	7.95028	8.00469	8.32282	8.16746	7.81182	7.97831	7.63077	8.11117	7.90754	8.32283	8.24726	7.61123	7.99736	8.39513	8.36134	8.05117	7.68093	7.57325	7.53832	7.77451	8.33159	-0.219094	0.319678	-0.38002	0.04708	0.390437	0.038516	-0.37447	-0.11576	-0.012946	-0.319512	0.106483	-0.415288	-0.271665	-0.566332	-0.037987	-0.459047	-0.620617	-0.029748	0.102805	-0.450572	-0.025041	-0.139535	-0.7271	0.38554
13335173	AT1G03120	7.22283	7.23875	7.13147	6.46755	7.51714	7.11714	7.54671	7.21821	6.63155	6.65026	7.36591	6.77663	7.81244	7.67067	7.69187	6.46744	7.56492	6.88207	7.29276	7.19596	7.31884	6.19791	7.44272	6.50238	0.58961	0.431922	0.5604	-0.000109	0.047787	-0.235068	0.32388	-0.020538	-0.499923	0.182714	-0.151225	-0.340513	-0.519677	-0.47471	-0.373028	-0.26953	-0.122206	-0.379694	-0.843557	-0.454172	0.126895	-0.452244	0.029019	-0.039181
13335176	AT1G03150	9.06083	9.39507	8.7332	8.1331	9.73064	9.03258	9.09712	9.35566	8.6583	8.50197	9.39075	8.6954	9.06358	8.88093	8.81721	8.46412	9.20044	8.69721	8.94875	8.87506	8.77786	8.46577	8.90905	8.77027	0.002754	-0.514145	0.084009	0.331016	-0.530194	-0.335378	0.036294	-0.039418	-0.074902	0.368871	-0.339889	-0.33718	-0.114834	-0.005866	-0.039349	0.001657	-0.291393	0.073069	-0.151128	0.033552	0.035553	-0.367214	0.048496	0.410249
13335185	AT1G03160	9.45244	9.67922	9.63277	9.63277	9.63913	9.7865	9.52789	9.62189	9.66471	9.70183	9.59229	9.40181	9.64984	9.66212	9.96897	9.81739	9.73912	9.83454	9.64501	9.73336	9.68758	9.79236	9.61938	9.63543	0.197401	-0.017096	0.336205	0.184623	0.099985	0.04804	0.075453	-0.057323	0.031946	0.069061	-0.046844	-0.384687	-0.004824	0.071241	-0.28139	-0.025036	-0.119737	-0.199111	-0.080277	0.128564	-0.313336	-0.094097	-0.072893	0.185576
13335201	AT1G03170	3.61876	3.58227	4.00878	3.59083	3.16964	3.03214	3.49468	3.53073	3.54049	3.59216	3.23392	3.36429	3.56917	3.27048	3.26702	3.26212	3.05202	3.20072	2.72902	3.4869	3.13493	3.37768	3.1629	3.33262	-0.049593	-0.31178	-0.741766	-0.328709	-0.117625	0.168582	-0.124084	-0.051532	-0.468294	0.001329	0.064281	0.332157	-0.84015	0.216413	-0.132085	0.115556	0.110883	0.131904	-0.716066	0.267945	0.336209	0.114227	0.046602	-0.200253
13335205	AT1G03180	6.09373	5.33762	5.68575	5.97331	5.77995	6.03226	6.02434	5.62227	5.59805	5.58561	6.47433	6.15122	4.66504	5.65914	5.13859	5.58799	5.58232	5.56794	4.56683	4.67389	5.2858	5.35713	5.4439	5.34255	-1.42869	0.321521	-0.547158	-0.385324	-0.197627	-0.464312	-0.069386	0.284657	-0.0877	-0.387698	0.694373	0.118962	-0.098207	-0.985242	0.147209	-0.230858	-0.138429	-0.225391	-0.028821	-1.2699	0.234909	0.15684	-0.832802	-0.344353
13335217	AT1G03190	8.09223	7.92869	7.88088	7.95601	7.89692	7.91397	7.82058	8.2405	7.82776	7.96163	8.06872	7.93636	8.06856	8.0487	8.27984	8.21526	7.92557	7.96122	8.04304	7.98897	8.12685	7.86928	8.03952	7.97149	-0.023669	0.120007	0.398955	0.259253	0.028648	0.047251	-0.271648	0.311811	-0.053126	0.005619	0.171793	0.022391	-0.025525	-0.059729	-0.152991	-0.345983	0.113952	0.010278	0.246123	-0.37154	-0.099865	-0.351602	-0.057841	-0.012113
13335232	AT1G03200	5.90629	5.56661	5.42535	5.85087	4.89188	4.97448	5.92601	6.36628	4.74103	5.7447	5.80327	5.15279	4.43314	4.14104	3.80043	4.16972	3.60175	3.70036	3.97378	4.10813	4.0198	3.55058	3.7158	3.68816	-1.47315	-1.42557	-1.62492	-1.68115	-1.29014	-1.27412	0.019721	0.799676	-0.684323	-0.10617	0.911383	0.178313	-0.459359	-0.032912	0.219373	-0.619142	0.114052	-0.012197	-0.47908	-0.832588	0.903696	-0.512972	-0.797331	-0.19051
13335237	AT1G03210	8.65987	7.98727	7.66874	8.35202	8.10823	8.01002	8.49298	8.4219	7.89249	8.45484	8.53979	8.83275	8.2446	8.01138	8.38974	8.50159	8.54309	8.65697	8.56676	8.71213	8.49613	8.85185	8.8736	8.62391	-0.415268	0.024103	0.720993	0.149561	0.434864	0.646947	-0.166892	0.43463	0.223749	0.102814	0.431567	0.822725	0.322156	0.700752	0.106392	0.350263	0.330514	-0.033059	0.489048	0.266122	-0.117357	0.247449	-0.101053	-0.855784
13335243	AT1G03220	6.29266	5.31495	5.62572	5.30572	5.75328	5.47072	6.48655	5.94097	6.14496	5.40696	5.90807	5.75926	4.83051	4.75604	4.816	4.96104	4.93029	4.91261	5.11415	4.93629	5.30072	4.78912	4.59614	4.73301	-1.46215	-0.558908	-0.809721	-0.344678	-0.822982	-0.558108	0.193887	0.626022	0.519238	0.101238	0.154796	0.288539	0.283634	0.180249	0.484719	-0.171927	-0.334159	-0.179599	0.089747	-0.445773	-0.034519	-0.273165	-0.488955	-0.468138
13335246	AT1G03230	8.95921	8.07874	8.28622	8.37612	8.59103	8.04938	8.98095	8.16372	8.3581	8.43478	8.52148	7.79962	7.78327	7.76285	7.95854	7.68135	7.68737	7.78366	7.89292	8.02031	7.92893	7.93877	7.64746	7.45542	-1.17594	-0.315889	-0.327683	-0.694772	-0.90366	-0.265723	0.021742	0.084981	0.071876	0.058653	-0.069549	-0.249766	0.109643	0.25746	-0.029609	0.257418	-0.039912	-0.328233	0.087901	0.172479	-0.101485	0.198765	0.029637	-0.078467
13335249	AT1G03270	6.67895	6.65087	6.68978	6.43655	7.26665	6.94706	6.75403	6.31369	6.41758	5.99072	7.03198	6.20028	6.36183	6.57504	6.72905	6.25884	6.81526	6.89731	5.97641	6.02809	6.91002	5.94363	6.53138	6.49199	-0.317119	-0.075829	0.03927	-0.177716	-0.451393	-0.049753	0.075078	-0.33718	-0.272203	-0.445832	-0.234671	-0.746779	-0.38542	-0.546955	0.180968	-0.315203	-0.283877	-0.405322	-0.460498	-0.209775	0.453171	0.130629	-0.049206	0.341457
13335262	AT1G03280	6.89051	6.71098	6.62265	6.46215	6.89257	6.57001	6.85659	6.56125	6.7585	6.69264	6.84452	6.97399	7.14675	7.00366	6.97875	7.12018	7.2119	7.07331	6.9184	6.90658	6.85649	7.06855	7.04665	7.25237	0.256246	0.292682	0.356099	0.658032	0.31933	0.503298	-0.033915	-0.149732	0.135849	0.230496	-0.048047	0.403979	-0.228356	-0.097081	-0.122257	-0.051636	-0.165252	0.179061	-0.194441	0.052651	-0.258106	-0.282132	-0.117205	-0.224918
13335273	AT1G03290	8.17685	8.42033	7.89776	7.86512	8.25638	8.57996	8.41633	8.17917	8.26846	8.18421	8.67793	9.21482	8.21521	8.2931	8.62444	8.43742	8.72434	8.63643	8.46692	8.57056	8.55237	8.70543	8.89525	8.83339	0.038361	-0.127233	0.726678	0.572308	0.467963	0.056469	0.239484	-0.241164	0.3707	0.319091	0.421547	0.634853	0.251707	0.277464	-0.072072	0.268007	0.170904	0.196956	0.012223	0.518628	-0.442772	-0.051084	-0.250643	-0.437897
13335286	AT1G03310	6.80165	7.34994	7.35714	7.01816	7.68256	7.82451	7.10204	7.14309	7.16778	6.91099	7.76542	7.67	6.79062	7.20832	7.03223	6.75063	7.44828	7.64288	6.52411	6.89515	6.90155	6.65556	7.48058	7.63798	-0.011027	-0.141613	-0.324913	-0.267528	-0.234285	-0.181623	0.300392	-0.206843	-0.189357	-0.107173	0.082855	-0.154503	-0.26651	-0.313172	-0.13068	-0.095072	0.032297	-0.004898	-0.566902	-0.106329	0.058677	0.012101	-0.050558	0.149605
13335291	AT1G03320	2.79514	3.62971	3.72598	3.91725	3.58548	3.71448	3.44314	3.3609	3.39172	3.35355	4.20514	3.31338	3.63588	3.70698	4.02988	4.16322	4.6304	3.90955	3.90228	3.75474	3.93605	3.97795	3.53344	3.37565	0.840743	0.077264	0.303901	0.245961	1.04492	0.195068	0.648006	-0.26881	-0.334266	-0.563706	0.619657	-0.401101	0.266396	0.047757	-0.093828	-0.185264	-1.09696	-0.533901	-0.38161	0.316567	0.240438	0.378442	-1.71662	-0.1328
13335294	AT1G03340	6.95495	6.87609	6.72669	6.27144	6.64201	6.56982	7.09469	6.94548	7.13989	6.50619	6.7747	6.72804	6.16456	6.86088	7.18729	6.15398	6.72837	6.76405	6.3918	7.12234	6.82516	6.73553	6.71418	7.29484	-0.790388	-0.01521	0.460601	-0.117461	0.086363	0.194235	0.139735	0.069383	0.413202	0.234748	0.132692	0.158225	0.227241	0.261457	-0.362123	0.581554	-0.014189	0.530784	0.087506	0.192074	-0.775325	0.346806	-0.146881	0.372559
13335301	AT1G03360	8.24687	8.02109	8.16161	7.50184	7.68993	7.52152	8.21519	8.24733	8.24733	7.52435	7.62318	7.31663	8.16601	8.23907	8.11317	7.54343	7.50114	7.98546	8.28998	8.31262	8.24182	7.30663	7.7234	8.04507	-0.080861	0.21798	-0.04844	0.041588	-0.188792	0.463938	-0.03168	0.226241	0.085717	0.022503	-0.066752	-0.204897	0.123965	0.073548	0.128651	-0.236805	0.222257	0.059608	0.155645	-0.152693	0.042934	-0.259308	0.289009	0.264505
13335311	AT1G03365	7.68496	7.99175	7.87777	7.92924	7.79334	7.67527	7.86958	8.11029	7.8477	7.83273	7.99946	7.78098	8.07899	8.22742	8.21036	8.35894	8.15209	8.05972	8.10555	8.17162	8.26086	8.16407	8.11089	8.05931	0.394035	0.235668	0.3326	0.429696	0.358752	0.384449	0.18462	0.118547	-0.030061	-0.096518	0.206119	0.105704	0.02656	-0.055797	0.050499	-0.194872	-0.041197	-0.000407	-0.15806	-0.174344	0.08056	-0.098354	-0.247316	-0.106111
13335316	AT1G03370	8.9714	8.32643	8.31807	8.61977	8.29551	8.42901	9.11307	8.59612	8.6977	8.84031	8.76514	8.90877	9.30029	8.8626	9.05817	9.06266	8.99995	8.9763	9.43358	9.15205	9.08857	9.21708	9.19309	9.01687	0.328898	0.536165	0.740094	0.442889	0.704442	0.54729	0.141678	0.269684	0.379626	0.220537	0.469637	0.479761	0.133282	0.289454	0.030406	0.154416	0.193147	0.040571	-0.008396	0.01977	-0.34922	-0.066121	-0.27649	-0.43919
13335327	AT1G03380	9.61361	9.77528	9.57838	9.55326	9.91956	9.69456	9.7637	9.85801	9.63805	9.73635	9.75846	9.74605	9.78179	9.80404	9.80135	9.69213	10.0286	9.82414	9.74023	9.86373	9.67929	9.76783	9.89888	9.86967	0.168182	0.028759	0.222975	0.138868	0.109051	0.129581	0.150086	0.082725	0.059676	0.183091	-0.161099	0.051489	-0.04156	0.059694	-0.122058	0.075693	-0.129733	0.045533	-0.191646	-0.023031	-0.181734	-0.107398	0.031366	-0.005956
13335339	AT1G03430	9.63964	9.59177	9.56841	8.95821	9.70634	9.81587	9.82038	9.70827	9.51935	9.23764	10.0159	10.0134	8.55552	8.4737	8.51529	8.61398	8.50105	8.5891	8.86454	8.47035	8.39839	8.46704	8.90938	8.8724	-1.08411	-1.11807	-1.05311	-0.344234	-1.20529	-1.22677	0.180738	0.116506	-0.04906	0.279427	0.309529	0.197538	0.309015	-0.003349	-0.116901	-0.14694	0.408328	0.2833	0.128277	-0.119855	-0.067841	-0.426367	0.098799	0.085762
13335347	AT1G03440	7.71817	7.72379	7.62479	7.80246	8.16131	8.00317	7.8519	7.72379	7.66285	7.52439	8.09712	7.69435	7.73738	7.57965	7.70543	7.69134	8.00315	7.69171	7.56283	7.70272	7.59308	7.4416	7.8482	7.52488	0.019211	-0.144137	0.080646	-0.111119	-0.158161	-0.311464	0.133729	0	0.038063	-0.278074	-0.064192	-0.308819	-0.174553	0.12307	-0.112353	-0.249742	-0.154953	-0.16683	-0.308282	0.12307	-0.150416	0.028332	-0.090761	0.141989
13335351	AT1G03490	3.48221	3.74735	3.59152	3.41433	3.6512	3.41796	3.85672	3.79153	3.49469	3.68929	3.38497	3.8552	3.79643	3.49982	3.6829	3.7248	3.71485	3.69408	3.92786	3.6829	3.4931	3.5981	3.81461	3.71877	0.314219	-0.247532	0.091373	0.310471	0.063643	0.276112	0.374505	0.044171	-0.096836	0.274964	-0.266234	0.43724	0.131428	0.183075	-0.189798	-0.126698	0.099764	0.024695	-0.243077	0.138904	-0.092962	-0.401662	0.365998	-0.412545
13335356	AT1G03495	7.49139	7.97645	8.13015	6.72748	7.95791	8.6637	7.5217	7.91321	8.30827	7.48889	8.32276	10.593	5.41019	6.13675	6.34838	5.75596	6.15415	6.07878	6.42765	6.87319	7.28955	5.46712	6.83418	6.24436	-2.0812	-1.83971	-1.78177	-0.971519	-1.80376	-2.58492	0.030303	-0.063244	0.178113	0.761411	0.364847	1.92933	1.01746	0.736443	0.941164	-0.288841	0.680034	0.165574	0.987155	0.799687	0.763051	-1.05025	0.315187	-1.76376
13335360	AT1G49020	4.68178	3.46023	3.91998	4.29346	4.29346	2.93413	4.20541	2.93721	3.32342	4.69456	4.22716	3.85248	4.19137	2.68586	3.81279	3.05222	4.12167	2.20173	3.91998	4.27341	2.50599	3.90601	4.12167	3.77129	-0.490405	-0.774365	-0.107194	-1.24124	-0.171787	-0.732405	-0.476364	-0.523023	-0.596558	0.401107	-0.066298	0.918348	-0.271391	1.58755	-1.30679	0.853786	0	1.56956	0.204973	2.11057	-0.710234	0.452679	0.066298	0.651216
13335362	AT1G03540	6.89115	7.68626	7.62268	7.46564	6.89492	7.19607	7.08664	7.6621	7.31833	7.53883	6.89282	7.17725	6.93075	7.14012	7.45598	7.53245	6.89732	6.92057	7.04834	6.76514	7.05671	6.98231	7.16547	7.06915	0.039601	-0.546142	-0.166693	0.066809	0.002396	-0.275496	0.195495	-0.024157	-0.304345	0.073188	-0.002097	-0.018819	0.117589	-0.374978	-0.399273	-0.550139	0.268158	0.14858	-0.077906	-0.350821	-0.094928	-0.623327	0.270255	0.167399
13335364	AT1G03550	8.64343	8.63691	8.64685	8.44289	8.14943	8.0697	8.63443	8.70527	8.5567	8.52924	8.43676	8.49934	7.29154	8.23359	7.85303	6.7922	6.62672	6.65921	7.18395	8.46445	7.92139	6.65263	6.33795	6.88827	-1.35189	-0.403314	-0.793827	-1.65069	-1.52271	-1.41049	-0.009	0.068356	-0.090154	0.086348	0.287328	0.429639	-0.107591	0.230854	0.068364	-0.139573	-0.288775	0.229057	-0.098591	0.162498	0.158518	-0.225921	-0.576103	-0.200582
13335368	AT4G03410	5.96167	6.17713	6.20775	5.87342	5.66365	6.51275	5.6271	7.05702	5.92213	5.82962	5.98457	6.15322	5.97845	6.25646	6.1621	5.98457	5.47839	5.95136	5.79361	6.4755	5.59727	5.20327	5.97777	6.13647	0.016783	0.079328	-0.04565	0.111149	-0.185253	-0.561397	-0.334566	0.879888	-0.285618	-0.043798	0.320925	-0.359535	-0.184845	0.219041	-0.564825	-0.781302	0.499376	0.185113	0.149721	-0.660847	-0.279207	-0.737504	0.178451	0.544648
13335370	AT1G03600	10.5163	10.6844	10.668	10.2073	10.9501	10.8797	10.6106	10.4993	10.6157	10.1731	10.8178	10.4952	10.5237	10.4515	10.4996	10.0458	10.8186	10.7915	10.5264	10.4614	10.255	10.1398	10.8501	10.6312	0.00747	-0.23291	-0.1684	-0.16147	-0.13141	-0.08821	0.09436	-0.18509	-0.05224	-0.03414	-0.13229	-0.38451	0.00263	0.00989	-0.24462	0.09404	0.03146	-0.16029	-0.09173	0.19498	-0.19238	0.12818	0.16375	0.22422
13335374	AT1G03610	9.15022	8.72906	8.63641	8.42835	9.19663	8.45085	9.18108	8.83959	8.34146	8.55922	8.62054	8.4254	8.82432	8.65651	8.41977	8.50362	8.82728	8.2993	9.10852	8.85425	8.45871	8.34686	8.56206	8.26217	-0.325895	-0.072545	-0.216642	0.07527	-0.369354	-0.151551	0.030864	0.110533	-0.29495	0.130871	-0.57609	-0.025445	0.284194	0.197738	0.038944	-0.156765	-0.26522	-0.037129	0.25333	0.087205	0.333894	-0.287636	0.31087	-0.011684
13335382	AT1G03630	9.11355	9.48354	9.76575	9.31882	10.0331	10.0611	9.02581	9.21023	9.7119	9.37325	10.0116	9.78612	9.1909	9.37734	9.40371	9.22347	9.8046	9.97086	8.80001	8.97797	9.28422	9.01257	9.73562	9.64002	0.077354	-0.106204	-0.362039	-0.095346	-0.228496	-0.090224	-0.087734	-0.273306	-0.053851	0.054431	-0.0215	-0.274957	-0.390891	-0.399366	-0.11949	-0.2109	-0.068984	-0.330839	-0.303157	-0.12606	-0.065639	-0.265331	-0.047484	-0.055882
13335390	AT1G03687	7.89522	8.1739	8.31546	8.32742	7.99467	7.90528	8.04219	8.07694	8.02203	8.28688	8.07105	7.8254	7.80451	7.97201	8.03579	8.11512	7.80719	7.85613	7.74594	7.79878	8.00915	8.05192	7.77436	7.88493	-0.090706	-0.20189	-0.279678	-0.212306	-0.187474	-0.049144	0.146973	-0.096959	-0.293432	-0.040544	0.076381	-0.079871	-0.058576	-0.173232	-0.026638	-0.063196	-0.032835	0.028803	-0.205549	-0.076273	0.266794	-0.022652	-0.109216	0.108674
13335401	AT1G03700	2.72891	3.00874	2.77455	2.98432	2.85186	2.64935	2.63171	2.78413	2.78294	2.87322	2.62452	2.84267	3.16771	2.71505	3.10039	2.72514	2.80843	2.73473	2.85186	3.1598	2.77402	2.87189	2.91212	2.84117	0.438798	-0.293688	0.325844	-0.259176	-0.043436	0.085375	-0.097201	-0.224609	0.00839	-0.111105	-0.227347	0.193319	-0.315848	0.444745	-0.326373	0.146749	0.103693	0.106441	-0.218647	0.669354	-0.334763	0.257854	0.33104	-0.086878
13335407	AT1G03710	4.49605	4.17162	4.8859	4.64848	4.5201	4.59878	4.57942	4.48288	4.60787	3.87912	4.56358	4.50293	5.01014	5.90191	5.81475	5.03188	5.90043	5.91622	6.21872	6.13691	6.32594	4.64179	5.9952	5.22825	0.514086	1.73029	0.92885	0.383395	1.38033	1.31744	0.083373	0.31126	-0.278028	-0.769357	0.043478	-0.095846	1.20858	0.235006	0.51119	-0.390087	0.094773	-0.687966	1.12521	-0.076254	0.789218	0.37927	0.051295	-0.59212
13335414	AT1G03740	11.4515	10.9411	10.5983	10.5741	10.8209	10.525	11.4208	11.1295	10.9518	10.9402	10.8746	10.5519	11.4291	11.1917	11.1353	11.0006	11.1049	10.8975	11.5207	11.3945	11.0851	11.1744	11.0339	10.7515	-0.02235	0.25058	0.53703	0.42645	0.28395	0.37253	-0.03066	0.18842	0.35359	0.36611	0.05365	0.02696	0.0916	0.2028	-0.05016	0.17378	-0.07097	-0.14594	0.12226	0.01438	-0.40375	-0.19233	-0.12462	-0.1729
13335425	AT1G03750	7.70739	7.26359	7.13518	7.19725	7.41248	7.57565	7.68087	7.72748	7.23394	7.58369	7.5725	7.60201	7.60414	7.68426	7.14506	7.61984	7.74992	7.59145	7.43173	7.64382	7.51588	7.50256	7.53153	7.59666	-0.103247	0.420664	0.009883	0.422589	0.337444	0.015792	-0.026522	0.46389	0.098754	0.386444	0.160024	0.026356	-0.172415	-0.040438	0.370815	-0.117273	-0.218393	0.005219	-0.145893	-0.504328	0.272061	-0.503717	-0.378417	-0.021137
13335434	AT1G03770	9.35873	8.68907	9.06789	8.91016	8.91894	8.49991	9.1431	9.03326	9.0146	8.96848	8.73249	8.78426	9.03366	9.07807	8.8719	9.13015	9.08042	8.51557	8.80197	8.80425	8.93261	9.02455	8.81907	8.95818	-0.325071	0.388998	-0.195984	0.219985	0.16148	0.015668	-0.215627	0.344189	-0.053287	0.058317	-0.186453	0.284354	-0.231683	-0.273818	0.060712	-0.105596	-0.261352	0.442606	-0.016056	-0.618007	0.113999	-0.163913	-0.074899	0.158252
13335446	AT1G03790	3.56153	3.66151	3.53849	3.71381	3.63332	3.80862	3.62146	3.74207	3.69879	3.65168	3.75661	3.87983	4.14559	4.04642	4.21735	4.01542	3.50425	4.10326	4.40871	3.92149	3.85762	3.90986	3.70355	4.27069	0.584055	0.384914	0.678861	0.301613	-0.129073	0.294639	0.059929	0.080566	0.160306	-0.062129	0.123291	0.071208	0.263117	-0.124926	-0.359727	-0.105563	0.199301	0.167426	0.203188	-0.205492	-0.520033	-0.043434	0.07601	0.096218
13335449	AT1G03810	3.63232	4.56992	4.5884	4.29964	3.84837	4.55216	3.27339	4.29533	3.59806	3.5326	4.40739	4.05006	3.53867	4.26523	3.97693	3.87597	3.60144	3.67859	4.05467	3.99573	4.04344	4.71267	3.69777	3.89713	-0.093649	-0.304692	-0.611471	-0.423676	-0.246928	-0.873574	-0.358929	-0.274586	-0.990336	-0.767044	0.559018	-0.502096	0.515994	-0.269502	0.066513	0.836702	0.09633	0.218545	0.874923	0.005084	1.05685	1.60375	-0.462688	0.720641
13335452	AT1G03880	4.05648	3.72962	3.5089	4.02878	3.66136	3.51331	3.92855	3.7033	3.75423	3.75846	3.80588	3.69321	4.43609	4.07918	4.19531	4.1323	4.07956	4.07655	4.48734	4.02284	4.38797	4.1407	3.87462	3.88337	0.379607	0.34956	0.686404	0.103518	0.418204	0.563239	-0.127932	-0.026319	0.245322	-0.27032	0.144525	0.179898	0.051255	-0.056342	0.192658	0.008407	-0.204945	-0.193176	0.179187	-0.030023	-0.052664	0.278727	-0.34947	-0.373074
13335458	AT1G03890	3.63096	3.72149	3.54991	4.02504	3.84468	4.06188	3.70156	3.61585	3.84557	3.69071	4.08996	3.58547	4.38665	3.9382	3.96606	4.17621	4.06789	3.96537	3.99699	4.50809	4.27471	3.9713	4.11254	3.79288	0.755689	0.216714	0.416148	0.151175	0.223211	-0.096503	0.070598	-0.105642	0.29566	-0.33433	0.245282	-0.476407	-0.389657	0.569883	0.308649	-0.204909	0.044654	-0.172498	-0.460255	0.675525	0.012989	0.129421	-0.200628	0.303909
13335465	AT1G03900	9.95159	9.81587	9.72958	9.96384	9.63332	9.62775	9.91021	9.89068	9.87144	9.8665	9.77079	9.82199	9.87097	9.89597	9.92504	10.0808	9.84524	9.69568	10.0043	9.97886	9.80874	10.037	9.90842	9.91425	-0.080616	0.080107	0.195461	0.117008	0.211915	0.067924	-0.041382	0.074812	0.141854	-0.097342	0.137466	0.194241	0.133298	0.082885	-0.116301	-0.04389	0.063185	0.21857	0.17468	0.008073	-0.258155	0.053452	-0.074281	0.024329
13335471	AT1G03905	4.6818	4.56067	4.6262	5.29626	4.74742	4.63136	5.3793	4.79149	4.86989	4.95411	4.93839	4.82344	6.50708	6.15417	6.33804	6.35913	6.08756	6.11855	6.73262	6.2715	6.55099	6.99211	6.22489	6.3544	1.82528	1.59351	1.71184	1.06287	1.34014	1.48719	0.697498	0.230828	0.243691	-0.34215	0.190974	0.192083	0.225538	0.117331	0.212955	0.63298	0.137327	0.235856	-0.47196	-0.113497	-0.030736	0.97513	-0.053647	0.043773
13335480	AT1G03910	9.89469	9.82042	9.71306	9.81741	9.78328	9.85891	9.954	9.84319	9.87242	9.71727	9.60841	9.83927	9.97088	9.93587	9.90919	9.85369	9.75705	9.85601	9.96329	9.91383	9.82855	9.68375	9.84943	9.94133	0.076198	0.115451	0.196129	0.036278	-0.02623	-0.002903	0.059313	0.022772	0.159361	-0.10014	-0.174869	-0.019637	-0.007596	-0.022041	-0.080646	-0.169937	0.092381	0.085324	-0.066909	-0.044813	-0.240007	-0.069797	0.26725	0.104961
13335496	AT1G03920	5.81922	5.49951	5.62876	5.5394	5.65743	5.68263	5.70028	5.8953	5.33986	5.14864	5.70747	5.18291	5.64209	5.16926	5.27097	5.23263	5.32483	5.44922	4.81504	5.25032	5.58458	5.08218	5.34429	5.26011	-0.177131	-0.330243	-0.357787	-0.306772	-0.332603	-0.233412	-0.118941	0.395795	-0.288898	-0.390755	0.050037	-0.499722	-0.827053	0.081058	0.313609	-0.150449	0.019463	-0.189108	-0.708112	-0.314737	0.602507	0.240306	-0.030574	0.310614
13335511	AT1G03930	9.6402	9.39278	9.36993	9.70324	9.65797	9.78343	9.5553	9.43347	9.18898	9.71208	9.48405	9.45719	9.28244	9.36709	9.03628	9.38933	9.453	9.34774	9.26544	9.02138	8.9856	9.38649	9.12565	9.28717	-0.357753	-0.025687	-0.333652	-0.313911	-0.204976	-0.435692	-0.084897	0.040686	-0.180949	0.008836	-0.173919	-0.326237	-0.017008	-0.345711	-0.050679	-0.002846	-0.327342	-0.060565	0.067889	-0.386397	0.13027	-0.011682	-0.153423	0.265672
13335524	DQ108711	7.85906	7.71471	8.06385	7.09812	6.87139	6.99797	7.58772	7.15829	7.75457	7.26691	6.38312	6.4701	7.15286	7.93352	7.77737	7.485	7.29414	7.65848	7.97177	7.10848	6.58097	7.10402	7.42313	7.52341	-0.706199	0.218803	-0.286473	0.38688	0.422751	0.660504	-0.271335	-0.556427	-0.309281	0.168789	-0.488273	-0.527871	0.818911	-0.825039	-1.1964	-0.380981	0.128991	-0.135062	1.09025	-0.268612	-0.887122	-0.54977	0.617264	0.392809
13335526	AT1G03960	6.9594	7.42475	7.15598	6.79602	6.72858	6.87035	6.90079	7.1077	7.08749	6.84539	6.47303	6.64026	7.19988	7.65257	7.51164	7.02762	7.25058	7.27975	7.29736	7.56955	7.36532	6.84939	7.03938	6.8423	0.240484	0.227823	0.355666	0.2316	0.521999	0.409396	-0.058605	-0.317049	-0.068484	0.049365	-0.255547	-0.230093	0.097476	-0.083021	-0.146329	-0.178232	-0.211202	-0.437442	0.156081	0.234028	-0.077845	-0.227597	0.044345	-0.207349
13335542	AT1G03970	6.91525	6.82469	7.06603	6.74837	6.92815	6.86052	6.61008	6.63346	6.90615	6.902	6.67642	7.0818	6.91521	7.09647	6.89615	6.89315	6.90615	6.75641	6.93521	7.07036	6.85009	7.07539	6.83269	6.96183	-4.3e-05	0.27178	-0.169878	0.144772	-0.022005	-0.104113	-0.305166	-0.191225	-0.159882	0.153622	-0.251733	0.221282	0.020004	-0.026108	-0.046056	0.182243	-0.073452	0.205423	0.32517	0.165117	0.113826	0.028621	0.178281	-0.015859
13335546	AT1G03990	5.86769	6.23098	6.08843	6.95135	6.80721	6.13002	6.30979	6.29642	6.04593	6.61028	6.61359	5.94111	7.14805	6.98272	7.08617	8.1731	7.81269	7.20293	7.25852	7.27035	7.09377	7.89508	7.72913	6.93559	1.28037	0.751736	0.997737	1.22175	1.00548	1.07291	0.442101	0.065443	-0.042497	-0.34107	-0.193619	-0.188909	0.110466	0.287633	0.007606	-0.278025	-0.08356	-0.267336	-0.331635	0.22219	0.050103	0.063045	0.110059	-0.078427
13335550	AT1G04020	6.33493	6.0049	5.95964	6.76949	6.31923	6.74959	6.1998	5.84944	5.86504	6.29349	6.65159	6.59545	6.0543	5.96864	6.15069	6.78824	6.4728	6.8078	5.96879	5.75504	6.15728	6.38944	6.49649	6.76582	-0.280629	-0.036264	0.191045	0.018744	0.153574	0.058212	-0.13512	-0.155465	-0.094599	-0.476006	0.332366	-0.154141	-0.085505	-0.213606	0.006598	-0.398797	0.023688	-0.041983	0.049615	-0.058141	0.101197	0.077209	-0.308678	0.112158
13335566	AT1G04030	7.59041	7.77101	7.52281	7.68241	7.53723	7.53723	7.48761	7.53605	7.47606	7.49844	7.31475	7.52492	7.63516	7.4849	7.48618	7.73572	7.52669	7.06559	7.18476	6.93344	7.41216	7.70094	7.25188	7.28356	0.044753	-0.286107	-0.036632	0.053313	-0.010545	-0.471648	-0.102792	-0.234964	-0.046748	-0.183964	-0.222484	-0.01231	-0.450395	-0.551459	-0.074017	-0.034782	-0.274815	0.21797	-0.347603	-0.316495	-0.027269	0.149182	-0.052331	0.23028
13335573	AT1G04080	8.09455	8.0815	8.0006	8.26606	8.07235	8.0424	8.00675	8.00553	8.1072	8.16565	8.03111	8.04241	8.49669	8.39444	8.43871	8.63437	8.36004	8.35044	8.1575	8.22035	8.42054	8.6427	8.42288	8.45621	0.402141	0.312937	0.438102	0.368312	0.287685	0.308041	-0.087801	-0.07597	0.1066	-0.100411	-0.04124	1e-05	-0.33919	-0.17409	-0.018166	0.00833	0.062842	0.105766	-0.251389	-0.09812	-0.124766	0.108741	0.104082	0.105756
13335592	AT1G04090	4.64345	4.49792	4.62899	4.55058	4.22443	4.20543	4.2208	4.55159	4.36952	4.55626	4.30063	4.14649	5.30884	5.49162	5.28812	5.61988	5.40071	4.78089	5.0523	4.7359	5.28727	5.30999	5.08308	4.69725	0.66539	0.993703	0.659128	1.06931	1.17628	0.575462	-0.422646	0.053669	-0.259465	0.005681	0.076203	-0.058942	-0.25654	-0.755725	-0.000848	-0.309892	-0.317638	-0.083641	0.166106	-0.809394	0.258617	-0.315573	-0.393841	-0.024699
13335597	AT1G04100	7.7382	7.16891	6.74641	7.32214	7.12562	7.07946	7.67365	7.43801	7.17549	7.01327	6.78069	6.85888	7.91843	7.34744	7.29128	6.92608	7.41028	7.42014	7.98177	7.63304	7.22811	7.23251	7.15943	7.43605	0.180233	0.178529	0.544865	-0.396061	0.284658	0.340682	-0.064552	0.269098	0.429071	-0.30887	-0.344931	-0.220578	0.063337	0.285599	-0.063169	0.306428	-0.250845	0.015906	0.127889	0.016501	-0.49224	0.615298	0.094086	0.236484
13335604	AT1G04130	8.51665	8.4571	8.7716	7.94204	8.6678	8.82524	8.53284	8.68674	8.71938	7.51848	8.90325	8.87225	8.4125	8.78821	8.59954	7.97453	8.97723	8.71608	8.45589	8.63413	8.91419	7.96359	8.9097	8.60534	-0.104151	0.331112	-0.172063	0.032489	0.309434	-0.109163	0.016192	0.229642	-0.052218	-0.423555	0.235446	0.04701	0.04339	-0.154078	0.314654	-0.01094	-0.067535	-0.110731	0.027198	-0.38372	0.366872	0.412615	-0.302981	-0.157741
13335615	AT1G04160	8.10135	7.8125	7.68428	8.23408	7.97898	8.56328	7.69287	7.26647	7.43323	7.65497	7.96708	7.60757	8.42923	8.16377	7.8641	7.94384	8.20997	7.8125	7.83125	7.66721	7.93645	7.5902	7.75525	7.38607	0.327878	0.351267	0.17982	-0.290238	0.230988	-0.75078	-0.40848	-0.546027	-0.251048	-0.579114	-0.0119	-0.955708	-0.597985	-0.496556	0.07235	-0.353639	-0.454713	-0.426427	-0.189505	0.049471	0.323398	0.225475	-0.442813	0.529281
13335639	AT1G04170	10.1159	10.1731	10.232	10.156	9.93443	10.2238	10.0489	10.1536	10.1543	10.0975	10.1212	10.0015	9.8675	9.91733	9.97169	9.94115	9.76433	9.97516	9.82917	9.88829	9.85428	9.80926	9.73741	9.822	-0.248413	-0.25574	-0.260304	-0.214826	-0.170107	-0.248625	-0.06701	-0.01946	-0.07767	-0.05848	0.186726	-0.22227	-0.038327	-0.029042	-0.117405	-0.131896	-0.026917	-0.153154	0.028683	-0.009582	-0.039735	-0.073416	-0.213643	0.069116
13335650	AT1G04180	5.43933	5.51649	5.09183	5.18371	5.04178	5.53787	5.77743	5.4962	4.07474	5.11168	4.97424	4.48597	5.57858	6.45557	5.92242	5.34596	6.623	4.99116	5.12637	6.10215	5.52514	5.25134	5.67779	4.86198	0.139249	0.939082	0.830589	0.162243	1.58121	-0.546703	0.338098	-0.020293	-1.01709	-0.072035	-0.067544	-1.0519	-0.452208	-0.353418	-0.397278	-0.094613	-0.94521	-0.129184	-0.790306	-0.333125	0.619812	-0.022578	-0.877666	0.922713
13335653	AT1G04200	9.35514	8.88492	8.8761	9.19379	9.14358	9.2608	9.32751	9.0168	8.89421	9.15954	9.20717	9.45682	9.70247	9.29927	9.17232	9.45596	9.43499	9.45503	9.58412	9.10533	9.13136	9.48334	9.46302	9.56526	0.347337	0.414345	0.29622	0.262161	0.291412	0.194231	-0.027631	0.13188	0.018114	-0.034257	0.063594	0.196025	-0.118359	-0.193939	-0.040958	0.027383	0.028027	0.11023	-0.090728	-0.325819	-0.059072	0.06164	-0.035567	-0.085795
13335674	AT1G04210	9.3503	9.38615	9.29233	9.35821	9.36071	9.39532	9.25993	9.32455	9.43907	9.32326	9.25692	9.08667	9.45194	9.31516	9.16656	9.25014	9.33322	9.24078	9.33809	9.18661	9.29085	9.15785	9.26282	9.22579	0.101641	-0.070983	-0.125774	-0.108064	-0.027495	-0.154537	-0.090374	-0.061595	0.146734	-0.034949	-0.103796	-0.308649	-0.113853	-0.128551	0.124287	-0.092294	-0.070393	-0.014988	-0.023479	-0.066956	-0.022447	-0.057345	0.033403	0.293661
13335688	AT1G04230	8.88061	8.89028	8.64767	8.9003	8.72366	8.5995	8.73769	8.77205	8.78844	8.80037	8.86607	8.72675	8.79377	8.9195	8.93317	9.06051	9.05317	9.09268	8.89718	9.06069	8.85978	8.96948	9.05072	8.93179	-0.086844	0.029219	0.285491	0.160216	0.329509	0.493186	-0.142916	-0.118227	0.140765	-0.099926	0.142408	0.127249	0.103413	0.14119	-0.073387	-0.091029	-0.002454	-0.160889	0.246329	0.259417	-0.214152	0.008897	-0.144862	-0.288138
13335698	AT1G04250	7.19925	7.92174	6.66717	7.48655	8.72363	8.80046	7.44176	7.50303	6.88555	7.13379	8.7825	8.79935	8.29557	8.65915	7.72689	8.1749	9.24081	9.43804	8.00668	8.04662	7.59816	8.03135	9.28331	9.18242	1.09632	0.737412	1.05972	0.688346	0.517175	0.637586	0.242507	-0.418713	0.218375	-0.352763	0.05887	-0.001104	-0.288888	-0.612529	-0.128727	-0.143547	0.042497	-0.255625	-0.531395	-0.193816	-0.347102	0.209216	-0.016373	-0.254521
13335706	AY074838	8.10692	8.30816	8.4429	8.41415	8.51367	8.65141	8.23426	8.44832	8.1892	8.08958	8.5723	8.30804	8.18085	8.44789	8.28213	8.56932	8.67295	9.001	8.45718	8.27959	8.70621	8.70958	8.77395	9.09691	0.073933	0.139729	-0.160777	0.155173	0.159281	0.349598	0.127346	0.14016	-0.253697	-0.324569	0.058624	-0.343362	0.276335	-0.168296	0.424083	0.140263	0.100999	0.095908	0.148989	-0.308456	0.67778	0.464832	0.042375	0.43927
13335709	AT1G04320	3.93885	3.94976	4.4137	4.31363	4.01831	4.31007	4.01106	4.81492	4.1025	3.91784	4.23407	4.3522	3.78339	4.2957	4.26005	4.44707	4.13732	4.0279	3.87757	3.94921	4.32906	4.02635	4.18927	4.12063	-0.155457	0.345937	-0.153647	0.133441	0.119012	-0.282169	0.072211	0.865165	-0.311195	-0.395785	0.215761	0.04213	0.094178	-0.346488	0.069011	-0.42072	0.051951	0.092733	0.021967	-1.21165	0.380206	-0.024935	-0.16381	0.050603
13335711	AT1G04350	7.66123	7.78485	7.85472	8.34491	9.03148	8.88751	8.01902	7.70595	7.91676	8.45001	8.91782	8.63865	7.90185	7.97508	8.0701	8.26456	8.75249	8.833	7.87028	7.85386	7.94848	8.49214	8.77473	8.90809	0.240618	0.190224	0.215383	-0.080353	-0.278995	-0.054511	0.357785	-0.078903	0.062039	0.105103	-0.113667	-0.248861	-0.031575	-0.12122	-0.121619	0.227579	0.022244	0.075092	-0.38936	-0.042317	-0.183658	0.122476	0.135911	0.323953
13335717	AT1G04370	4.50952	4.64262	4.07294	4.40843	4.19616	4.45281	4.75534	4.97356	4.74897	4.36768	4.94918	4.6055	5.05597	4.47793	4.71392	4.60808	5.16534	5.33674	5.6317	4.69587	4.8695	4.80106	4.62379	4.99281	0.54645	-0.164689	0.640985	0.199655	0.969178	0.883932	0.245826	0.330942	0.676038	-0.040754	0.753018	0.152692	0.575731	0.21794	0.155582	0.192978	-0.541555	-0.343924	0.329905	-0.113002	-0.520456	0.233732	-1.29457	-0.496616
13335719	AT1G04420	10.0938	9.99618	10.1592	9.96949	10.119	10.2185	10.0689	9.87976	10.2016	9.97931	9.9977	9.58609	10.0793	9.88796	9.99457	9.79995	9.87659	9.93848	9.84773	9.83319	10.0864	9.61747	9.79251	9.68984	-0.01451	-0.108224	-0.164621	-0.169542	-0.242381	-0.279978	-0.02491	-0.116426	0.04242	0.009814	-0.121267	-0.632373	-0.231576	-0.054769	0.091801	-0.182476	-0.084084	-0.248639	-0.206666	0.061657	0.049381	-0.19229	0.037183	0.383734
13335729	AT1G04425	7.992	7.42089	7.88281	7.22353	6.65162	7.10852	7.51623	7.06876	7.64532	6.60697	6.23806	6.06843	9.6647	9.50241	9.36336	10.0495	9.69498	9.79911	9.63572	9.40941	9.38489	9.80091	9.68688	9.46593	1.6727	2.08153	1.48055	2.82597	3.04336	2.6906	-0.475772	-0.352131	-0.237481	-0.616562	-0.413559	-1.04009	-0.028982	-0.093003	0.021529	-0.24859	-0.008104	-0.33318	0.44679	0.259128	0.25901	0.367972	0.405455	0.70691
13335733	AT1G04430	10.3359	10.2051	10.1707	10.5559	9.88734	10.1337	10.1291	10.044	10.144	10.4906	9.96155	9.95412	10.6047	10.3127	10.2447	10.4514	9.99612	10.1048	10.2276	10.1048	10.096	10.4789	9.75804	9.89597	0.26877	0.10752	0.07402	-0.10453	0.108787	-0.02888	-0.20684	-0.16114	-0.02673	-0.06526	0.074216	-0.179597	-0.37713	-0.20782	-0.14872	0.0275	-0.238084	-0.208875	-0.17029	-0.04668	-0.12199	0.09276	-0.3123	-0.029278
13335746	AT1G04440	10.6024	10.6734	10.5216	10.3455	10.6582	10.5098	10.5743	10.615	10.5522	10.3375	10.677	10.6706	10.7194	10.7224	10.6867	10.3138	10.7335	10.7471	10.8226	10.7651	10.608	10.4514	10.7898	10.7256	0.11694	0.04901	0.16516	-0.03174	0.07533	0.23724	-0.02809	-0.05845	0.03063	-0.00803	0.01879	0.16075	0.10319	0.04262	-0.07868	0.13759	0.05629	-0.02151	0.13128	0.10107	-0.10931	0.14562	0.0375	-0.18226
13335761	AT1G04445	4.33817	4.47438	4.19232	4.54435	4.20673	4.63618	4.45381	4.48356	4.34163	4.37609	4.10496	4.43662	4.77	4.62152	4.7134	4.74982	4.40955	4.77772	5.00683	4.47564	4.81079	4.64775	4.29755	5.02117	0.431824	0.147141	0.521075	0.20547	0.202823	0.141542	0.115636	0.009181	0.149304	-0.168263	-0.101764	-0.199561	0.236837	-0.145872	0.097397	-0.102073	-0.111997	0.243447	0.121201	-0.155053	-0.051907	0.06619	-0.010233	0.443008
13335763	AT1G04450	4.5109	4.4133	3.9552	4.45955	4.0302	4.27882	4.36078	4.37868	4.01954	4.09138	4.00853	4.06006	4.86916	4.44644	4.28451	4.90989	4.53589	4.4438	4.82521	4.38591	4.3643	4.3427	4.38443	4.38028	0.358261	0.033144	0.329318	0.450339	0.505685	0.164978	-0.150127	-0.034616	0.064342	-0.368177	-0.021677	-0.218755	-0.043954	-0.060536	0.079791	-0.567194	-0.151464	-0.063514	0.106173	-0.02592	0.015449	-0.199017	-0.129787	0.155241
13335769	AT1G04480	6.98304	7.10326	6.66582	6.63305	6.59805	7.00541	6.80448	6.58084	7.34712	7.29478	6.66431	6.8014	6.83085	6.93826	7.06599	7.25579	6.73229	7.35419	7.36242	7.30496	6.82027	7.46493	7.11263	7.24744	-0.152198	-0.164998	0.400174	0.622737	0.134246	0.348787	-0.178566	-0.522415	0.6813	0.66173	0.066263	-0.204008	0.531573	0.366705	-0.245718	0.209134	0.380338	-0.106751	0.710139	0.88912	-0.927018	-0.452596	0.314075	0.097257
13335773	AT1G04501	4.464	4.47455	4.3048	4.21648	4.05649	4.12352	4.26233	4.17874	4.24099	4.30317	4.47455	4.20989	5.06795	4.46035	4.92023	4.74127	4.47455	5.21867	4.76767	5.13966	5.32651	4.75441	4.69391	5.0823	0.603955	-0.014202	0.61542	0.524791	0.418062	1.09515	-0.20167	-0.295811	-0.063811	0.086692	0.418062	0.086367	-0.300285	0.67931	0.406283	0.013137	0.219356	-0.13637	-0.098615	0.975121	0.470094	-0.073555	-0.198706	-0.222737
13335775	AT1G04510	9.80007	9.81521	9.78044	10.1156	9.72951	9.86498	9.76679	9.89531	9.94176	9.9654	9.805	9.99568	9.89094	9.98112	9.94299	10.1285	9.86062	10.0132	9.77197	9.95134	9.87801	9.98856	9.82191	10.0107	0.09087	0.165916	0.162548	0.01292	0.131104	0.14827	-0.033287	0.080098	0.16132	-0.150176	0.07549	0.130702	-0.118976	-0.029785	-0.064977	-0.139942	-0.038711	-0.00252	-0.085689	-0.109883	-0.226297	0.010234	-0.114201	-0.133222
13335789	AT1G04520	6.60752	7.1637	7.13941	7.29993	7.63776	7.76148	6.55826	6.32727	6.9794	7.14395	7.52404	6.45294	6.86545	7.01753	6.54768	7.18999	7.48812	7.60197	6.25764	6.57634	6.97736	6.82044	7.33003	6.90097	0.257933	-0.146163	-0.591723	-0.109936	-0.14964	-0.159512	-0.04926	-0.836427	-0.160007	-0.155978	-0.11372	-1.30854	-0.60781	-0.44119	0.429674	-0.369547	-0.158094	-0.700999	-0.55855	0.395237	0.589681	-0.213569	-0.044374	0.607536
13335795	AT1G04540	5.54272	4.67656	4.87035	5.40242	5.85082	6.05538	5.26512	4.70738	4.63738	5.24509	6.03683	6.2552	5.93375	5.33075	5.26886	6.06264	5.95854	6.01856	5.4005	5.09308	5.54319	5.93046	6.15102	6.06376	0.391038	0.654182	0.398518	0.660215	0.107717	-0.036817	-0.2776	0.030813	-0.23297	-0.157329	0.186011	0.199821	-0.533257	-0.237667	0.274321	-0.132171	0.192478	0.045199	-0.255657	-0.26848	0.507291	0.025158	0.006467	-0.154622
13335797	AT1G04550	9.25621	9.10729	9.52659	9.7589	9.86308	9.98634	9.18387	9.10485	9.30329	9.80687	9.71486	9.67762	9.17369	9.63834	9.51329	9.94609	10.3053	10.2626	9.41028	9.40768	9.40488	10.2126	10.1991	10.1097	-0.082521	0.531046	-0.013301	0.187193	0.442229	0.276233	-0.072345	-0.002445	-0.223302	0.047979	-0.148216	-0.308717	0.236593	-0.230657	-0.10841	0.266461	-0.10616	-0.15284	0.308938	-0.228212	0.114892	0.218482	0.042056	0.155877
13335808	AT1G04555	7.93763	7.7521	7.54408	7.5806	7.79189	7.54615	7.58013	7.7842	7.64164	7.75177	7.83996	8.04059	7.93985	8.09805	7.94794	8.16409	8.14294	8.06382	8.24196	8.14197	8.24639	8.07739	7.90214	8.06326	0.002223	0.345951	0.403862	0.583495	0.35105	0.517675	-0.357497	0.032092	0.097558	0.171177	0.048064	0.49444	0.302104	0.043912	0.29845	-0.086704	-0.240802	-0.000558	0.659601	0.01182	0.200892	-0.257881	-0.288866	-0.494998
13335815	AT1G04560	4.16231	3.79025	3.79831	3.80147	3.957	3.78736	4.04343	4.06681	3.80737	3.95285	3.67857	3.6759	3.86982	3.81219	3.7593	3.93359	3.84396	3.67654	3.65959	3.79831	3.72328	3.99066	3.8954	4.02657	-0.292489	0.021947	-0.039004	0.132121	-0.113044	-0.110824	-0.118879	0.276565	0.009068	0.15138	-0.278434	-0.111465	-0.210229	-0.013887	-0.036028	0.057068	0.051446	0.35003	-0.09135	-0.290452	-0.045096	-0.094312	0.32988	0.461495
13335821	AT1G04600	4.80692	4.58818	3.87415	4.5202	4.0906	5.51303	4.29273	4.32453	4.9093	4.62777	5.77265	7.3333	5.83821	4.73606	5.48699	5.90833	5.96554	6.58932	5.39744	4.99639	5.6288	5.77373	6.16991	6.6063	1.03129	0.147884	1.61284	1.38813	1.87494	1.07629	-0.514194	-0.263642	1.03514	0.107573	1.68205	1.82028	-0.440771	0.260334	0.141813	-0.134598	0.204375	0.01698	0.073423	0.523976	-0.893331	-0.242171	-1.47768	-1.8033
13335846	AT1G04610	4.58516	4.54566	4.61703	5.25663	4.8434	4.8084	4.94876	4.76925	4.95869	4.90485	4.9443	4.70725	5.02495	5.24181	5.08547	5.44042	4.74563	5.02632	5.33108	5.28237	4.92044	4.72656	5.10346	5.06651	0.439792	0.696151	0.468433	0.183794	-0.097769	0.217924	0.363601	0.223592	0.341661	-0.351782	0.100895	-0.101149	0.306125	0.040562	-0.16503	-0.713864	0.357831	0.040191	-0.057476	-0.18303	-0.506691	-0.362082	0.256936	0.14134
13335852	AT1G04635	5.51306	4.54837	5.29538	4.57585	4.32346	4.03216	4.83726	4.29214	4.72322	4.23912	4.87079	4.32602	4.48657	4.85151	4.54837	4.58902	3.9344	4.34411	4.5659	4.03793	4.98014	4.16838	3.68035	4.43731	-1.02649	0.303137	-0.747006	0.013164	-0.389054	0.311943	-0.6758	-0.256232	-0.572156	-0.336734	0.547334	0.293853	0.079327	-0.81358	0.431769	-0.420639	-0.254057	0.093199	0.755127	-0.557348	1.00392	-0.083905	-0.801391	-0.200654
13335856	AT1G04640	9.27303	9.5132	9.66385	10.3297	9.68926	9.64972	9.13456	9.17628	9.5797	10.301	9.77562	9.40309	9.45585	9.40751	9.73089	10.24	9.78249	9.93987	9.49349	9.47157	9.82488	10.3816	9.79393	9.79484	0.182822	-0.105684	0.067038	-0.08966	0.09323	0.290148	-0.138469	-0.336915	-0.084145	-0.02865	0.086361	-0.24663	0.037639	0.064061	0.093996	0.14157	0.01144	-0.145032	0.176108	0.400976	0.178141	0.17022	-0.074921	0.101598
13335862	AT1G04670	2.79386	2.65232	2.75777	2.7183	2.72278	2.4757	2.71053	2.61438	2.77668	2.69648	2.71383	2.6598	2.8721	2.84421	2.89277	2.87167	2.688	2.77973	2.56957	2.75132	3.30058	2.75108	2.94798	2.67158	0.07824	0.191894	0.134996	0.153368	-0.034784	0.304033	-0.083332	-0.037931	0.018913	-0.021817	-0.008954	0.184102	-0.302531	-0.092887	0.407815	-0.120582	0.259984	-0.108149	-0.219199	-0.054956	0.388902	-0.098765	0.268938	-0.292251
13335868	AT1G04690	10.5571	10.7031	10.6119	10.2772	10.4675	10.7517	10.5632	10.6895	10.6929	10.3195	10.6764	10.8489	10.6703	10.7786	10.7478	10.4009	10.5752	10.6862	10.6637	10.8303	10.7398	10.3533	10.6664	10.9065	0.11321	0.07551	0.13596	0.12372	0.10767	-0.06553	0.00608	-0.01363	0.08103	0.04233	0.20885	0.09715	-0.00662	0.05166	-0.00807	-0.04761	0.09121	0.2203	-0.0127	0.06529	-0.0891	-0.08994	-0.11764	0.12315
13335876	AT1G04700	5.72025	4.9747	5.61559	5.79204	4.95201	5.66528	5.17731	5.70991	5.23492	5.36688	5.51391	5.63805	5.80504	5.77249	5.79464	6.64541	5.93938	6.13384	5.52122	5.285	5.87939	5.67338	5.8077	5.70978	0.084787	0.797796	0.179048	0.85337	0.987373	0.468558	-0.542936	0.735216	-0.380676	-0.425159	0.561895	-0.027231	-0.283812	-0.487495	0.084744	-0.972033	-0.131682	-0.424059	0.259124	-1.22271	0.46542	-0.546874	-0.693577	-0.396828
13335887	AT1G04710	7.19236	7.27661	8.04165	7.75213	7.85281	7.79865	7.20724	7.26571	7.6333	7.46668	7.8193	7.42389	6.82297	7.26799	7.22302	7.04692	7.15963	7.32768	6.74766	6.87686	7.37353	6.90092	6.91322	7.19485	-0.369387	-0.008624	-0.818629	-0.705208	-0.693179	-0.470966	0.014878	-0.010903	-0.408349	-0.285447	-0.033506	-0.374764	-0.07531	-0.391133	0.150515	-0.145998	-0.246409	-0.132834	-0.090188	-0.38023	0.558864	0.139449	-0.212903	0.24193
13335903	AT1G32620	7.23904	7.61597	7.65361	7.61795	7.64776	8.21388	6.4257	8.52865	6.78868	6.75766	7.27012	7.18639	7.0439	7.47996	7.13978	7.55618	6.79303	7.39092	7.83327	6.51674	6.85088	7.32085	7.52856	6.30463	-0.195131	-0.136011	-0.513821	-0.061764	-0.854723	-0.822958	-0.813331	0.912684	-0.864923	-0.860284	-0.377636	-1.02749	0.789365	-0.963215	-0.288907	-0.235331	0.73553	-1.08629	1.6027	-1.8759	0.576016	0.624953	1.11317	-0.058795
13335905	AT1G04760	6.31316	6.27742	5.93433	6.33166	6.09422	6.55053	6.63152	6.73778	5.94685	5.64024	6.27884	5.19878	7.0505	5.91163	6.43161	6.51039	6.16293	6.72564	6.73478	6.16153	6.37968	6.75197	6.53203	6.27567	0.737348	-0.365785	0.497277	0.178727	0.068711	0.175109	0.31836	0.460364	0.012517	-0.691422	0.184622	-1.35175	-0.315727	0.249902	-0.05193	0.241579	0.369096	-0.449969	-0.634087	-0.210462	-0.064447	0.933001	0.184474	0.901785
13335910	AT1G04778	3.50453	3.37993	3.03216	3.90576	3.14813	3.39359	3.22092	3.03178	3.36268	3.19579	3.21986	3.18801	3.26538	3.44288	3.19437	3.82489	3.3816	3.14163	3.40859	3.30157	3.3836	3.37911	3.22789	3.42597	-0.23915	0.062955	0.162209	-0.080866	0.233464	-0.251955	-0.283615	-0.348151	0.330513	-0.709974	0.07173	-0.20558	0.14321	-0.141308	0.18923	-0.445788	-0.153703	0.284337	0.426825	0.206843	-0.141283	0.264186	-0.225433	0.489917
13335914	AT1G04790	9.05292	8.70724	9.00386	9.10065	9.05287	8.99584	9.02666	9.00106	8.8323	8.99209	9.00491	9.06736	9.01439	9.05082	8.94737	9.26907	9.01297	9.00743	9.00547	8.90236	9.00178	9.00491	8.82157	8.95306	-0.03853	0.343581	-0.056492	0.168421	-0.039902	0.011593	-0.026265	0.293827	-0.171557	-0.108565	-0.047966	0.071524	-0.008925	-0.148461	0.054415	-0.264166	-0.191404	-0.054374	0.01734	-0.442288	0.225972	-0.155601	-0.143438	-0.125898
13335925	AT1G04810	8.29964	8.41938	8.12586	8.70607	8.02792	8.41927	8.26549	8.33781	8.30893	8.64403	8.4513	8.49572	8.63463	8.6672	8.51347	9.14852	8.5214	8.56748	8.38203	8.56719	8.65279	8.9736	8.5621	8.80508	0.334991	0.247822	0.387608	0.44246	0.493477	0.148209	-0.034151	-0.081572	0.183069	-0.062037	0.423376	0.076443	-0.252607	-0.100013	0.139318	-0.174926	0.0407	0.237598	-0.218456	-0.018441	-0.043751	-0.112889	-0.382676	0.161155
13335940	AT1G04900	7.271	7.50283	7.60296	7.41498	6.93124	6.88119	7.08256	7.5686	7.6987	7.23151	7.12105	7.0157	7.46704	7.84539	7.73658	7.46847	6.88992	7.19399	7.08615	7.41091	7.62063	7.10371	6.85093	7.26538	0.196039	0.342568	0.133619	0.053492	-0.041327	0.312797	-0.188443	0.065775	0.095743	-0.183471	0.189805	0.134508	-0.380887	-0.434485	-0.115952	-0.364763	-0.038988	0.071392	-0.192444	-0.50026	-0.211695	-0.181292	-0.228793	-0.063116
13335956	AT1G04945	8.57292	8.55436	8.43001	8.22815	8.45081	8.2712	8.47691	8.496	8.6064	8.32817	8.31205	8.18784	8.5381	8.5306	8.3666	8.16073	8.42049	8.55133	8.33929	8.54206	8.62567	8.15926	8.43587	8.43587	-0.034826	-0.02376	-0.063408	-0.067414	-0.030315	0.280129	-0.096009	-0.058361	0.17639	0.100025	-0.138757	-0.083367	-0.198805	0.01146	0.259065	-0.001471	0.015381	-0.11546	-0.102796	0.069821	0.082675	-0.101496	0.154138	-0.032093
13335972	AT1G04970	9.47127	9.93613	9.74995	9.29664	9.87339	9.46673	9.74217	10.0269	9.96581	9.46424	9.84774	9.78795	9.8054	10.1443	10.0843	9.5838	9.97221	9.84547	9.9381	10.3787	10.0852	9.79436	9.96512	10.1267	0.334133	0.208213	0.334383	0.287162	0.098821	0.378739	0.270898	0.090743	0.21586	0.167608	-0.025644	0.32122	0.132695	0.23438	0.00087	0.210558	-0.007093	0.281263	-0.138203	0.143637	-0.21499	0.04295	0.018551	-0.039957
13335980	AT1G05000	4.74477	4.25373	4.22448	5.45857	3.8955	3.73479	4.74106	4.35382	4.8318	5.79163	4.18612	5.17818	5.03945	4.19071	5.27637	6.24713	4.641	5.24246	5.24674	5.5721	5.32763	6.80072	5.16644	6.52444	0.294677	-0.063026	1.05188	0.788559	0.745499	1.50767	-0.003708	0.100086	0.607318	0.33306	0.290613	1.44339	0.207292	1.3814	0.051268	0.553582	0.525433	1.28198	0.211	1.28131	-0.55605	0.220522	0.23482	-0.16141
13335989	AT1G05080	2.63705	2.5081	2.65298	2.99019	2.86778	2.52488	2.46076	2.78015	3.04891	2.65753	2.33514	2.56593	2.37596	2.63705	2.46877	3.16015	2.5268	2.43279	2.44906	2.80561	2.57561	2.88649	2.64113	2.92992	-0.261086	0.128951	-0.184213	0.16996	-0.340977	-0.09209	-0.176289	0.272048	0.395932	-0.332658	-0.532634	0.041057	0.073099	0.168556	0.106846	-0.273661	0.114335	0.497137	0.249388	-0.103492	-0.289086	0.058997	0.646969	0.45608
13335993	AT1G05085	3.09468	3.308	3.15008	3.55323	3.39747	3.51265	3.62227	3.1569	3.02555	3.09866	3.44631	3.41859	3.52344	3.42372	3.69227	3.59382	3.52221	3.68402	3.65326	3.42031	3.64242	3.55074	3.27159	3.63931	0.428755	0.115718	0.542189	0.040591	0.124739	0.17137	0.527585	-0.151094	-0.124529	-0.454571	0.048838	-0.094056	0.129819	-0.003405	-0.049853	-0.04308	-0.25062	-0.044712	-0.397766	0.147689	0.074676	0.411491	-0.299458	0.049344
13335997	AT1G05090	6.96584	6.86484	7.10941	7.22205	7.19777	6.93916	7.18182	6.82958	7.08664	7.25081	6.871	7.24477	7.59745	7.58503	7.47985	7.63941	7.481	7.5303	7.30243	7.70108	7.42611	7.57057	7.52777	7.28484	0.63161	0.720188	0.370442	0.417363	0.283231	0.591143	0.215981	-0.035261	-0.022767	0.028755	-0.326767	0.305618	-0.295022	0.116052	-0.053741	-0.068849	0.046768	-0.24546	-0.511003	0.151313	-0.030974	-0.097604	0.373535	-0.551078
13336002	AT1G05100	5.68543	5.06476	5.14575	5.3151	5.77028	6.29765	4.61638	4.79376	5.19585	5.85495	5.92462	8.06752	6.00541	6.0887	5.19813	6.39429	6.23342	6.31127	5.65557	5.68092	5.56116	6.92507	7.08342	8.79824	0.319981	1.02394	0.052386	1.07919	0.463139	0.013618	-1.06905	-0.271002	0.050109	0.539847	0.154344	1.76987	-0.349843	-0.407778	0.363027	0.530774	0.849999	2.48697	0.719209	-0.136776	0.312918	-0.009073	0.695655	0.717098
13336006	AT1G05136	3.07213	2.97045	2.59638	2.91352	2.89327	2.74846	3.12098	3.02823	3.2826	2.83509	3.0152	2.7553	3.18212	3.0441	3.17453	3.53098	2.80414	3.17283	3.28739	3.20261	3.52127	3.1074	3.03985	2.87134	0.109989	0.073644	0.578152	0.617458	-0.089132	0.424364	0.048846	0.057777	0.686219	-0.078427	0.121933	0.00684	0.105272	0.158513	0.34674	-0.423574	0.23571	-0.301487	0.056426	0.100736	-0.339479	-0.345147	0.113777	-0.308327
13336008	AT1G05140	6.79525	6.99158	7.30443	6.97207	7.31913	7.30915	7.03481	7.22037	7.31006	7.21558	7.36992	7.05614	7.13789	7.24118	7.3784	7.33079	7.2766	7.28575	6.82162	7.15501	7.11669	7.20681	7.16017	7.19201	0.342639	0.249593	0.073964	0.358721	-0.042522	-0.023408	0.239555	0.228784	0.005625	0.24351	0.050791	-0.25301	-0.316268	-0.086163	-0.2617	-0.123983	-0.116437	-0.093738	-0.555823	-0.314947	-0.267325	-0.367493	-0.167228	0.159272
13336011	AT1G05200	7.66187	7.68016	7.46509	7.05926	7.53085	7.13575	7.76373	7.40107	7.39754	7.33322	7.39019	7.20888	5.30477	5.64767	5.9591	5.93121	6.27592	6.1368	6.11709	6.01998	5.86313	5.88641	6.03026	5.78513	-2.3571	-2.03248	-1.50599	-1.12805	-1.25493	-0.998944	0.101861	-0.279089	-0.067549	0.273964	-0.140655	0.073129	0.812322	0.372305	-0.095979	-0.044793	-0.245655	-0.351675	0.710461	0.651394	-0.02843	-0.318757	-0.105	-0.424804
13336021	AT1G05210	4.5157	4.29018	4.04308	3.9647	4.00023	4.34509	4.29018	3.97743	4.39295	3.61631	4.52767	3.99892	4.95681	4.37472	5.01473	4.04182	4.50711	4.80205	4.97086	4.88378	5.38207	4.50711	5.00865	4.50711	0.441113	0.084532	0.971651	0.07712	0.506871	0.45696	-0.225515	-0.312759	0.349872	-0.34839	0.527432	-0.346164	0.014044	0.509062	0.367341	0.465282	0.501543	-0.294943	0.239559	0.821821	0.017469	0.813672	-0.025889	0.051221
13336026	AT1G05220	5.28324	5.60035	5.48368	6.09408	5.82077	5.67384	5.85078	5.78372	5.79863	5.84838	6.03321	5.83034	6.24915	6.42502	6.28424	6.73223	6.62191	6.18926	6.22024	6.11731	6.81864	6.83186	6.64953	6.40587	0.965914	0.824667	0.800565	0.638152	0.80114	0.515423	0.567542	0.183371	0.31495	-0.245691	0.212437	0.156505	-0.028907	-0.307701	0.534398	0.099634	0.027622	0.216612	-0.596449	-0.491072	0.219448	0.345325	-0.184815	0.060107
13336032	AT1G05240	4.68073	4.58883	4.88317	5.08164	4.89375	5.40487	4.5404	4.95256	4.27919	4.48097	4.78849	5.04133	4.69161	4.43283	4.65371	4.40331	4.37632	4.0679	4.21672	4.29593	4.32094	4.05349	4.35179	4.29454	0.010885	-0.156004	-0.229464	-0.678333	-0.517431	-1.33696	-0.140323	0.363732	-0.603978	-0.600672	-0.105255	-0.363537	-0.474893	-0.136899	-0.332765	-0.349821	-0.024524	0.226636	-0.33457	-0.500631	0.271213	0.250851	0.080731	0.590173
13336039	AT1G05260	4.10675	4.17081	4.49055	4.53451	4.63375	4.26781	4.04704	4.258	4.29804	3.82665	4.26543	4.07785	4.29102	4.66829	4.41854	4.45229	4.3287	4.41854	4.90944	4.41854	4.03388	4.1876	4.27343	4.37803	0.184271	0.497479	-0.072002	-0.082217	-0.30505	0.150733	-0.059709	0.087192	-0.192509	-0.707861	-0.368321	-0.189965	0.618419	-0.24974	-0.384665	-0.264698	-0.055273	-0.040515	0.678128	-0.336932	-0.192156	0.443163	0.313048	0.14945
13336046	AT1G05320	7.47236	7.29318	7.42751	7.74197	7.73402	7.82408	7.33043	7.22085	7.38305	7.68499	7.58778	7.58211	6.80083	6.99198	6.97844	7.36211	7.34915	7.22633	6.7445	6.83439	7.14342	7.48977	7.42374	7.12595	-0.671531	-0.301203	-0.449065	-0.379855	-0.384875	-0.597746	-0.141932	-0.07233	-0.044453	-0.05698	-0.146248	-0.241964	-0.056327	-0.157591	0.164981	0.127655	0.074594	-0.100383	0.085605	-0.085261	0.209434	0.184635	0.220842	0.141581
13336057	AT1G05330	4.41343	4.3513	4.49552	4.22732	4.47224	4.92201	4.45342	4.42467	4.17085	4.50277	4.29219	4.59623	4.59803	4.05257	4.53148	4.28817	4.15003	5.15694	4.54124	4.43145	4.45887	3.94253	4.47589	4.33149	0.184599	-0.298727	0.035962	0.060844	-0.322216	0.234935	0.039986	0.073374	-0.324662	0.275447	-0.180056	-0.325776	-0.056787	0.378881	-0.072602	-0.345634	0.325863	-0.825453	-0.096773	0.305507	0.25206	-0.621081	0.505919	-0.499677
13336059	AT1G05360	7.59247	7.5623	7.85949	8.37436	8.25662	7.76279	7.52642	7.6746	7.73647	8.42748	8.08015	7.77553	7.48126	7.64529	7.73438	7.61097	7.69982	7.53299	7.18335	7.53574	7.25375	7.73513	7.537	7.54374	-0.111213	0.082995	-0.1251	-0.763392	-0.556802	-0.229803	-0.066048	0.112305	-0.123019	0.053123	-0.17647	0.012743	-0.29791	-0.109551	-0.480637	0.124162	-0.162823	0.010747	-0.231862	-0.221856	-0.357618	0.071039	0.013647	-0.001996
13336070	AT1G05380	8.98627	9.0061	8.95652	9.24715	9.04274	8.81131	8.99862	9.1466	8.82521	9.18798	8.94718	8.93185	8.92342	8.95566	8.9616	9.08004	8.95375	8.71661	8.85441	8.97069	8.98614	9.04278	8.73036	8.65201	-0.062852	-0.050433	0.005072	-0.167112	-0.08898	-0.094695	0.012351	0.140508	-0.131319	-0.059172	-0.095551	0.120547	-0.06901	0.015025	0.024541	-0.037256	-0.223398	-0.064598	-0.081361	-0.125483	0.15586	0.021916	-0.127847	-0.185145
13336080	AT1G05400	5.98768	6.07704	5.4757	6.05283	5.59235	5.941	5.62978	6.02758	5.7926	5.57514	5.96794	4.97147	6.09407	6.22734	6.3472	6.32099	6.41075	6.0819	6.52523	6.47481	6.71579	6.34074	6.31047	6.17394	0.106394	0.1503	0.871499	0.268167	0.818398	0.140899	-0.357898	-0.049458	0.316903	-0.477689	0.375589	-0.969531	0.431158	0.247476	0.368594	0.019744	-0.100272	0.092035	0.789056	0.296934	0.051691	0.497433	-0.475861	1.06157
13336087	AT1G05420	7.55658	6.99576	6.91311	6.80891	7.0442	6.95421	7.47938	7.41347	6.03514	6.08401	6.98588	5.95238	6.20704	4.51782	5.54831	5.8577	6.20278	6.10062	5.53393	4.93356	4.7381	5.84633	5.92684	5.33618	-1.34954	-2.47794	-1.36481	-0.951214	-0.841423	-0.853598	-0.077198	0.41771	-0.877968	-0.724899	-0.058323	-1.00184	-0.673104	0.415735	-0.810204	-0.011375	-0.275941	-0.764431	-0.595906	-0.001975	0.067764	0.713524	-0.217618	0.237406
13336089	AT1G05450	5.62624	6.19602	5.90109	5.76138	5.9234	6.11499	5.38852	6.61841	5.46752	5.64024	5.99939	6.43768	5.86837	5.8994	5.63783	5.61181	5.52323	5.80317	5.6373	5.56683	5.11549	5.32781	6.24088	5.73156	0.242125	-0.296626	-0.263266	-0.149569	-0.400177	-0.311825	-0.237719	0.42238	-0.433577	-0.121145	0.07599	0.322688	-0.231067	-0.332565	-0.522338	-0.284002	0.717649	-0.071604	0.006652	-0.754945	-0.088761	-0.162857	0.641659	-0.394292
13336097	AT1G05500	9.03193	9.08621	8.88526	8.87014	9.01911	9.23015	9.01981	8.95063	8.86818	8.80748	9.22539	9.24286	9.25879	9.32443	8.89663	8.79153	9.10648	9.26048	9.16897	9.1792	9.12477	8.82121	9.089	9.26196	0.226854	0.23822	0.011366	-0.078617	0.087366	0.030327	-0.012124	-0.135578	-0.017084	-0.062659	0.206275	0.012706	-0.089814	-0.145223	0.228144	0.029684	-0.017477	0.001483	-0.07769	-0.009645	0.245228	0.092343	-0.223752	-0.011223
13336113	AT1G05510	4.15515	4.67666	4.64422	4.50477	4.41735	4.61827	4.53442	4.49985	4.3263	4.1468	4.29486	4.64605	4.86831	4.62841	4.65486	4.97426	4.35126	4.53974	4.95299	4.90956	4.98576	4.3394	4.5739	4.86886	0.713161	-0.048255	0.010639	0.469484	-0.066083	-0.07854	0.379278	-0.176813	-0.317922	-0.35797	-0.122486	0.027778	0.084681	0.281152	0.330905	-0.63486	0.222639	0.329128	-0.294597	0.457965	0.648827	-0.27689	0.345125	0.30135
13336119	AT1G05540	5.3941	6.69767	7.25901	7.14457	7.60397	7.5804	5.79476	5.88051	6.73015	7.27474	7.03831	5.78595	6.49469	6.64056	7.45441	6.92659	7.9692	7.02248	6.24173	6.63191	6.89686	6.92021	7.40094	6.62958	1.10059	-0.057113	0.1954	-0.217977	0.36523	-0.557918	0.400658	-0.817165	-0.52886	0.130168	-0.565664	-1.79444	-0.252957	-0.008652	-0.557544	-0.00638	-0.568256	-0.392893	-0.653615	0.808513	-0.028684	-0.136548	-0.002592	1.40155
13336125	AT1G05560	8.96959	9.12922	9.85835	9.89058	9.66483	9.7904	9.53024	9.43735	10.0984	10.3442	9.76279	9.38245	8.52642	8.80692	9.57859	9.81771	9.54552	9.14341	9.78544	9.44486	9.88994	10.2062	9.34664	8.95887	-0.44317	-0.322293	-0.279764	-0.072867	-0.119307	-0.646989	0.560645	0.308131	0.240088	0.453613	0.097968	-0.407954	1.25901	0.637934	0.311356	0.38847	-0.198878	-0.184542	0.698369	0.329803	0.071268	-0.065143	-0.296846	0.223412
13336127	AT1G05590	9.18985	9.14443	9.15274	9.16288	9.25369	9.43957	9.05136	8.97407	9.06903	9.17929	9.39338	9.45839	9.33648	9.3806	9.32215	9.31722	9.59615	9.51247	9.17384	9.157	9.24304	9.20594	9.64056	9.38399	0.146631	0.236166	0.169402	0.154345	0.342464	0.072897	-0.138489	-0.170367	-0.083713	0.016411	0.139696	0.018814	-0.16264	-0.2236	-0.079109	-0.111282	0.044407	-0.128484	-0.024151	-0.053233	0.004604	-0.127693	-0.095289	-0.147298
13336132	AT1G05600	6.48538	6.80182	6.82411	6.98147	6.55096	6.78388	6.54898	6.76562	7.00127	6.86993	6.6252	6.2796	6.56174	6.62292	6.6984	6.62292	6.54439	6.75634	6.54708	6.54452	6.36782	7.0058	6.75873	6.46481	0.076363	-0.178904	-0.125704	-0.358549	-0.006563	-0.027536	0.063606	-0.036205	0.177161	-0.111534	0.074245	-0.504278	-0.014661	-0.078398	-0.33058	0.382882	0.214332	-0.291532	-0.078267	-0.042193	-0.507741	0.494416	0.140087	0.212746
13336138	AT1G05620	8.71911	8.98009	8.99219	9.20886	9.1104	9.09136	8.5627	8.75018	9.09083	9.10634	9.32044	9.57314	8.33548	8.78576	9.06521	8.88055	8.92297	9.21345	8.6038	8.79886	8.96025	9.37785	9.4111	10.1871	-0.383628	-0.194332	0.073023	-0.328304	-0.187429	0.122082	-0.156406	-0.229912	0.098641	-0.10252	0.210037	0.481774	0.268325	0.013105	-0.104959	0.497296	0.488127	0.973663	0.424731	0.243017	-0.2036	0.599816	0.27809	0.491889
13336150	AT1G05630	8.35539	8.10781	8.20314	8.47778	8.48565	8.39728	8.25721	7.95501	8.47611	8.75797	8.86155	9.03892	9.28911	8.94637	9.37337	9.36096	9.61561	9.35124	9.12417	8.95909	9.1615	9.43222	9.52051	9.41741	0.933719	0.838555	1.17024	0.883188	1.12996	0.953959	-0.098183	-0.1528	0.272972	0.280193	0.375898	0.641642	-0.164938	0.012721	-0.211878	0.071256	-0.095094	0.066171	-0.066755	0.165521	-0.48485	-0.208937	-0.470992	-0.575471
13336165	AT1G05690	6.69623	6.50773	6.47859	7.79919	7.63881	7.46319	6.36399	6.385	6.87654	7.57885	7.35556	7.5183	7.16467	7.33087	7.80093	8.55552	8.75099	8.62754	7.03866	7.31082	7.36457	8.73126	8.50512	8.54233	0.468431	0.823143	1.32234	0.756323	1.11218	1.16434	-0.332247	-0.122725	0.397953	-0.220339	-0.283251	0.055101	-0.126005	-0.020053	-0.436361	0.175746	-0.245871	-0.085211	0.206242	0.102672	-0.834314	0.396085	0.03738	-0.140312
13336173	AT1G05700	3.7604	3.91329	3.71955	4.55869	3.74693	3.82261	3.93766	3.9836	3.9477	3.86237	3.79707	3.89028	4.20975	4.20945	3.96534	4.12282	3.98548	3.84943	4.15853	3.78851	3.50041	3.95972	3.63145	3.80983	0.44935	0.296158	0.245786	-0.435863	0.238549	0.026822	0.177265	0.070314	0.228147	-0.696322	0.050142	0.067667	-0.051214	-0.420937	-0.464923	-0.163102	-0.354032	-0.039606	-0.228479	-0.491251	-0.69307	0.53322	-0.404174	-0.107273
13336185	AT1G05710	6.05618	5.63764	6.40024	7.17718	5.5855	5.18269	5.59976	5.06102	6.30157	7.21439	5.68692	5.97984	5.44789	5.3075	6.03301	6.6962	5.41081	5.53463	4.85651	5.24047	6.04141	6.5442	5.50183	5.89889	-0.608293	-0.330139	-0.367222	-0.480971	-0.174689	0.351938	-0.456422	-0.57661	-0.098664	0.037215	0.101426	0.797156	-0.59138	-0.067031	0.008395	-0.152001	0.091025	0.364264	-0.134958	0.509579	0.107059	-0.189216	-0.010401	-0.432892
13336198	AT1G05730	4.73373	4.42932	4.93518	3.95212	3.85622	3.70979	4.00774	4.72588	4.58621	4.39752	4.07589	4.0281	4.19733	4.70233	4.58966	4.48229	4.32686	4.80566	4.52917	4.78569	4.64965	4.4112	4.57515	4.16219	-0.536403	0.273009	-0.345518	0.530177	0.470635	1.09587	-0.725992	0.296553	-0.348963	0.445399	0.219667	0.318314	0.331842	0.083355	0.059995	-0.071099	0.248296	-0.643463	1.05783	-0.213198	0.408958	-0.516498	0.028629	-0.961777
13336204	AT1G05740	4.2713	5.0232	5.06261	4.63047	4.87578	4.82983	4.52776	5.14733	4.91652	5.14313	4.82899	4.56326	5.2058	6.18615	5.75949	5.08312	5.09454	5.38321	5.54145	4.98053	5.48082	4.9841	4.9927	5.52048	0.934499	1.16295	0.696879	0.452641	0.218761	0.553371	0.25646	0.124136	-0.146089	0.512658	-0.046786	-0.266577	0.335655	-1.20562	-0.278671	-0.099015	-0.101841	0.137278	0.079195	-1.32975	-0.132582	-0.611673	-0.055055	0.403855
13336208	AT1G05750	6.78351	6.97855	7.37142	7.31362	6.77999	6.54735	6.88673	7.00875	6.90751	7.0174	6.59535	6.73241	6.8072	7.04802	6.56851	7.21361	6.61488	6.42161	6.73828	6.84422	6.80797	6.94145	6.46503	6.50292	0.023686	0.069469	-0.80291	-0.100013	-0.16511	-0.125734	0.10322	0.0302	-0.463906	-0.296215	-0.184636	0.185061	-0.068913	-0.203798	0.239459	-0.272152	-0.149846	0.081309	-0.172133	-0.233998	0.703365	0.024063	0.03479	-0.103752
13336211	AT1G05780	8.53638	8.4326	8.40038	8.72624	8.61734	8.52258	8.59901	8.39169	8.14682	8.63442	8.67125	8.44553	8.35773	8.25309	8.02185	8.53904	8.21525	8.25417	8.27618	8.13656	8.49869	8.40587	8.51176	8.09925	-0.178645	-0.179512	-0.378532	-0.187195	-0.402086	-0.268405	0.062626	-0.040912	-0.253566	-0.091819	0.053909	-0.077048	-0.081551	-0.116536	0.47684	-0.133174	0.29651	-0.154921	-0.144177	-0.075624	0.730406	-0.041355	0.242601	-0.077873
13336216	AT1G05785	8.24852	8.17225	8.4144	8.46391	8.45395	8.28325	8.33243	8.36511	8.29681	8.71483	8.73137	8.65278	8.53504	8.60416	8.57807	8.75861	8.80415	8.7941	8.48123	8.77023	8.77963	9.08028	8.82864	9.09567	0.286518	0.431919	0.163675	0.294697	0.350203	0.510849	0.08391	0.192862	-0.117589	0.250919	0.277419	0.369532	-0.053803	0.166062	0.201555	0.321673	0.024491	0.301567	-0.137713	-0.0268	0.319144	0.070754	-0.252928	-0.067965
13336226	AT1G05790	9.15769	9.03844	9.0897	9.37079	9.0695	8.85941	9.16503	9.1083	9.182	9.43483	9.10517	9.16946	9.15011	9.35706	9.46425	9.48265	9.37341	9.07343	9.24579	9.2603	9.39805	9.53535	9.19881	9.22941	-0.007581	0.318617	0.374546	0.111861	0.303912	0.214019	0.007348	0.069861	0.0923	0.064041	0.035669	0.310052	0.095688	-0.096755	-0.066199	0.052694	-0.174602	0.155987	0.08834	-0.166616	-0.158499	-0.011347	-0.210271	-0.154065
13336244	AT1G05800	3.64351	3.82469	3.48991	4.04287	3.64351	4.04398	3.8047	3.85439	3.55483	4.09768	4.47455	3.6633	4.45845	4.05093	4.25116	4.38902	3.70901	3.8926	4.17229	4.47375	4.39164	4.48282	4.02007	4.14539	0.814941	0.226249	0.761249	0.346157	0.065495	-0.151373	0.16119	0.0297	0.064911	0.054814	0.831043	-0.380672	-0.286166	0.422818	0.140479	0.093798	0.311065	0.252792	-0.447356	0.393118	0.075568	0.038984	-0.519978	0.633464
13336246	AT1G05805	10.9653	10.9859	10.7939	10.379	10.4344	10.2361	11.0185	10.8779	10.8013	10.4685	10.4636	10.4527	11.2812	11.1326	11.1529	10.8828	10.6377	10.4406	11.2164	11.1812	11.0353	10.8775	10.5776	10.4296	0.31588	0.14672	0.35904	0.50383	0.20325	0.2046	0.05318	-0.10796	0.00736	0.08949	0.02922	0.21668	-0.0648	0.04863	-0.11768	-0.00529	-0.06007	-0.01107	-0.11798	0.15659	-0.12504	-0.09478	-0.08929	-0.22775
13336254	AT1G05810	6.92766	6.52301	6.90227	6.74132	6.37929	5.64485	6.7841	6.22479	6.32204	7.01422	5.91709	5.71912	6.80148	6.93398	6.31312	6.81091	6.28064	5.5144	6.90933	6.38139	6.3847	7.21181	5.97376	5.17501	-0.126182	0.410974	-0.589143	0.069592	-0.098653	-0.130451	-0.143562	-0.298215	-0.580225	0.272902	-0.462207	0.07427	0.107859	-0.552592	0.071577	0.400901	-0.306877	-0.339392	0.251421	-0.254377	0.651802	0.127999	0.15533	-0.413662
13336258	AT1G05820	6.82861	6.96524	7.03911	6.36195	6.14726	5.69404	6.98306	6.98002	7.11527	6.47324	6.07851	5.4482	7.3344	7.01576	7.11704	6.77583	7.00818	6.35236	7.2582	7.13613	7.4332	6.76632	6.82327	6.5481	0.505792	0.050524	0.077932	0.413872	0.860912	0.658326	0.154457	0.014781	0.076162	0.111289	-0.068756	-0.245837	-0.076196	0.120367	0.316164	-0.009502	-0.184908	0.19574	-0.230653	0.105586	0.240002	-0.120791	-0.116152	0.441577
13336275	AT1G05830	9.76151	9.80611	9.84063	10.1379	9.9328	9.88182	9.69802	9.7287	9.95071	10.0101	9.88865	9.68953	9.76729	9.50149	9.66232	9.89646	9.63076	9.44325	9.4205	9.47917	9.57952	9.97063	9.60649	9.49488	0.005781	-0.30462	-0.178307	-0.241467	-0.30204	-0.438572	-0.063491	-0.077407	0.110086	-0.1278	-0.044141	-0.192291	-0.346792	-0.022317	-0.082806	0.074169	-0.024263	0.051633	-0.283301	0.05509	-0.192892	0.201969	0.019878	0.243924
13336299	AT1G05835	8.97349	8.34877	8.62238	8.72989	8.82573	8.40428	8.90909	8.16253	7.66917	8.32485	8.62369	7.83811	8.16674	8.1148	8.02208	8.12949	8.53895	8.07104	8.14591	8.04513	8.34667	8.26267	8.18467	7.87257	-0.806757	-0.233971	-0.600301	-0.600404	-0.286782	-0.333244	-0.064403	-0.186239	-0.953218	-0.405036	-0.202044	-0.566166	-0.020826	-0.069671	0.324587	0.133186	-0.354277	-0.198468	0.043577	0.116568	1.27781	0.538222	-0.152233	0.367698
13336303	AT1G05860	7.92547	7.97477	8.14332	7.82258	8.12462	7.57774	7.94399	7.91901	7.72778	7.93086	7.65877	7.63196	7.88798	8.21748	7.96868	7.9431	8.03998	8.06626	7.81052	7.90976	7.97988	8.0793	7.94407	7.73864	-0.037495	0.242713	-0.174644	0.120516	-0.084642	0.488521	0.018518	-0.055765	-0.415542	0.108281	-0.46585	0.054217	-0.07746	-0.307724	0.011202	0.136198	-0.095908	-0.327626	-0.095978	-0.251959	0.426744	0.027917	0.369942	-0.381843
13336309	AT1G05880	4.19315	4.42239	4.47819	4.0469	4.20413	4.41686	4.01779	4.46157	3.85586	4.40126	4.53929	5.4708	7.55626	6.35276	5.63388	6.13816	5.84123	7.28702	8.26211	7.20991	5.53282	6.66444	6.79191	7.69834	3.36311	1.93037	1.15569	2.09126	1.6371	2.87017	-0.175361	0.039187	-0.622328	0.35436	0.335153	1.05395	0.705846	0.857152	-0.101069	0.526284	0.950678	0.411317	0.881207	0.817965	0.521259	0.171924	0.615525	-0.642629
13336325	AT1G05890	9.44904	9.52107	9.46396	9.83235	9.31699	9.12488	9.43944	9.58596	9.49769	9.77573	9.30067	9.3978	9.5156	9.64189	9.75711	9.95556	9.61576	9.3537	9.69714	9.78285	9.62732	9.99677	9.57675	9.57631	0.066553	0.120816	0.293141	0.123219	0.298764	0.228818	-0.009608	0.064886	0.033728	-0.056613	-0.016324	0.272915	0.181543	0.140967	-0.129782	0.041204	-0.03901	0.222604	0.191151	0.076081	-0.16351	0.097817	-0.022686	-0.050311
13336342	AT1G05894	3.62332	3.13375	4.26523	3.72452	3.09866	3.45985	3.35695	3.26296	3.21039	3.57062	2.91511	3.11573	3.33611	3.13645	3.46816	4.23087	3.21527	3.75272	3.36383	3.53725	3.14964	4.03194	3.2564	3.13586	-0.287209	0.002706	-0.797073	0.506342	0.116609	0.292875	-0.266366	0.129213	-1.05484	-0.153908	-0.183551	-0.344119	0.027723	0.400799	-0.318519	-0.198926	0.04113	-0.616859	0.294089	0.271586	0.736325	-0.045018	0.224681	-0.27274
13336346	AT1G05900	7.84109	7.84037	7.99177	8.10778	8.51883	8.51608	7.97555	7.94278	7.91863	8.08653	8.41889	8.33379	7.85621	7.90578	7.90357	8.25254	8.54715	8.48206	7.87377	8.0949	8.11485	8.18536	8.54919	8.43108	0.015124	0.0654	-0.088201	0.144752	0.028316	-0.034026	0.134458	0.102403	-0.073146	-0.021253	-0.099943	-0.182293	0.017559	0.189121	0.211282	-0.067181	0.00205	-0.050972	-0.116899	0.086718	0.284428	-0.045928	0.101993	0.131321
13336361	AT1G05910	7.58354	7.54026	7.63911	8.01831	7.69798	7.80463	7.57668	7.83136	7.84952	7.86176	7.72392	7.94289	7.93886	7.80978	8.22861	8.29799	8.18214	8.1669	8.02072	8.02359	8.12439	8.09746	8.11862	8.354	0.355314	0.269524	0.589508	0.279682	0.484158	0.362273	-0.006866	0.291106	0.210415	-0.156552	0.025942	0.138264	0.081861	0.213809	-0.104229	-0.200536	-0.063517	0.187097	0.088727	-0.077297	-0.314644	-0.043984	-0.089459	0.048833
13336375	AT1G05920	3.08305	3.2982	3.38624	3.01491	2.84725	3.3792	2.83696	3.89327	3.36439	3.01426	3.29033	3.56428	3.24742	2.6996	3.51124	3.44604	3.12983	3.21515	3.83766	3.51275	3.40897	3.51015	3.47468	3.84026	0.164368	-0.598599	0.125001	0.431134	0.282575	-0.164048	-0.246095	0.595069	-0.021854	-0.000649	0.44308	0.185081	0.590243	0.813146	-0.102274	0.064106	0.344851	0.625115	0.836338	0.218077	-0.08042	0.064755	-0.098229	0.440034
13336379	AT1G05930	3.0836	3.4221	3.19877	3.81413	3.24709	3.9926	3.18926	3.18642	3.00634	3.2033	3.218	3.3332	3.23243	3.35715	3.17482	3.5303	3.34012	3.7448	3.59494	3.32455	3.89508	3.24306	3.84537	3.41271	0.148826	-0.064947	-0.02395	-0.283837	0.093027	-0.247803	0.105657	-0.235678	-0.192431	-0.610832	-0.029096	-0.659397	0.36251	-0.0326	0.720256	-0.287235	0.505253	-0.332087	0.256853	0.203078	0.912687	0.323597	0.534349	0.32731
13336382	AT1G05980	5.6322	6.44213	5.81814	5.7683	5.86207	6.53318	5.80734	6.70977	5.6642	5.54022	5.38518	6.53198	5.29061	5.77612	6.13618	6.34699	5.48916	6.04395	5.8078	5.76176	5.83356	5.29344	5.92068	5.75968	-0.341585	-0.666012	0.318033	0.57869	-0.372914	-0.489233	0.175146	0.267641	-0.153944	-0.22808	-0.476894	-0.001204	0.517192	-0.014365	-0.302617	-1.05355	0.431519	-0.284265	0.342046	-0.282006	-0.148673	-0.825472	0.908413	-0.283061
13336384	AT1G05990	3.34094	3.45865	2.94785	3.18949	3.06971	3.61143	3.46508	3.48869	3.61394	3.54623	3.70445	3.11557	3.87426	3.48576	3.72926	3.89117	3.51134	3.8123	3.67035	3.93388	3.39788	3.51645	3.34768	3.53042	0.533316	0.027106	0.781414	0.701683	0.441627	0.200875	0.124137	0.030036	0.666099	0.356745	0.634737	-0.49586	-0.203908	0.448119	-0.331377	-0.37472	-0.163658	-0.281881	-0.328045	0.418083	-0.997476	-0.731465	-0.798395	0.213979
13336387	AT1G06000	7.1139	7.37049	8.36189	8.31245	8.10757	8.43136	7.50347	7.97861	8.42207	8.53136	9.00924	9.96983	7.6459	8.0314	8.61927	8.49712	8.38534	9.11877	8.26584	8.27418	8.741	9.06696	9.21481	9.60898	0.532002	0.660908	0.257377	0.184668	0.277768	0.68741	0.389572	0.608124	0.060176	0.218913	0.901666	1.53848	0.619937	0.242782	0.121732	0.569844	0.829467	0.490206	0.230365	-0.365342	0.061556	0.350931	-0.072199	-1.04827
13336389	AT1G06010	9.13269	9.11156	9.30638	9.03616	8.99587	9.19597	9.15352	9.12292	9.09917	9.0012	9.01462	9.07733	7.87548	8.04574	7.78109	7.77975	7.87094	8.12232	8.37722	8.10346	8.20319	7.95125	8.19733	8.11617	-1.25721	-1.06582	-1.52529	-1.2564	-1.12492	-1.07365	0.020831	0.011362	-0.207213	-0.034952	0.018749	-0.118638	0.50174	0.057727	0.422094	0.171499	0.326387	-0.006152	0.480909	0.046365	0.629307	0.206451	0.307638	0.112486
13336394	AT1G06020	4.17369	4.34783	4.1459	4.43802	3.77193	4.2062	3.94421	4.84289	4.18526	4.37105	4.4936	4.19836	4.52743	4.18504	4.34585	4.05503	4.31833	4.1015	4.17256	4.27332	4.22248	4.21773	3.76957	4.14507	0.353738	-0.162796	0.199944	-0.38299	0.546406	-0.104701	-0.229481	0.495055	0.039351	-0.066965	0.721675	-0.007837	-0.354862	0.088278	-0.123374	0.162701	-0.548765	0.043575	-0.125381	-0.406777	-0.162725	0.229666	-1.27044	0.051412
13336399	AT1G06030	3.07042	3.08024	3.27723	3.29888	3.035	2.84148	3.53577	3.2144	3.35582	3.06408	3.09407	3.20187	4.02539	3.56072	3.36716	3.27039	2.62081	3.10055	3.62326	3.58371	3.68538	3.53841	3.7906	3.35467	0.95497	0.480481	0.089928	-0.028489	-0.414185	0.259073	0.465345	0.134156	0.078588	-0.234803	0.059069	0.360394	-0.402136	0.02299	0.318219	0.268019	1.16978	0.254122	-0.867481	-0.111166	0.239631	0.502822	1.11071	-0.106272
13336404	AT1G06060	8.72065	8.48308	8.50066	8.29987	8.66429	8.54055	8.72843	8.61958	8.41493	7.97995	8.51544	8.54106	8.74802	8.73113	8.63369	8.37587	8.75028	8.6398	8.79613	8.76286	8.6234	8.268	8.59619	8.59599	0.027369	0.248048	0.133029	0.076007	0.085984	0.099246	0.00778	0.136496	-0.085732	-0.319913	-0.148851	0.000512	0.048111	0.031731	-0.010285	-0.107869	-0.15409	-0.043809	0.040331	-0.104765	0.075447	0.212044	-0.005239	-0.044321
13336414	AT1G06080	6.17388	8.51971	8.72407	6.88471	7.98248	7.42892	6.66573	8.26845	7.72949	6.16157	6.93562	4.84736	4.38661	7.24416	7.67274	4.96948	7.14033	6.65907	4.73364	6.88911	7.24464	4.81602	5.91093	5.57784	-1.78727	-1.27555	-1.05133	-1.91523	-0.842147	-0.769858	0.491854	-0.251259	-0.994583	-0.723138	-1.04686	-2.58157	0.347035	-0.355054	-0.428102	-0.153457	-1.2294	-1.08123	-0.144819	-0.103795	0.566481	0.569681	-0.182541	1.50034
13336422	AT1G06090	4.06794	4.75679	4.75679	4.78751	4.45464	4.55631	4.46851	4.71556	4.70035	4.60761	5.26556	4.27672	4.85403	5.42902	4.61469	5.55424	5.05935	4.96344	4.71975	4.52844	4.3233	5.21839	5.14593	4.60817	0.786087	0.672231	-0.142101	0.766733	0.604703	0.407127	0.400564	-0.041234	-0.056436	-0.179899	0.810915	-0.279586	-0.13428	-0.900579	-0.291391	-0.335849	0.086585	-0.355269	-0.534844	-0.859345	-0.234955	-0.15595	-0.72433	-0.075683
13336428	AT1G06100	6.96077	6.13714	6.31444	6.71726	6.48262	6.50404	5.8622	6.8897	6.15921	6.30119	6.94432	7.61495	5.1834	5.60892	6.2637	6.17208	6.31225	6.13215	6.01515	5.98785	6.51447	5.67873	6.07434	5.7021	-1.77738	-0.528215	-0.050747	-0.545186	-0.170379	-0.371888	-1.09858	0.752559	-0.155232	-0.416069	0.461699	1.11091	0.83175	0.378926	0.250774	-0.493345	-0.237908	-0.430053	1.93033	-0.373633	0.406006	-0.077276	-0.699607	-1.54096
13336434	AT1G06120	2.7906	3.12285	3.43369	3.44337	3.33965	3.9452	4.66702	3.14174	3.68163	3.06276	3.15218	4.04399	3.14924	4.02406	3.85416	2.27484	2.94525	3.87786	3.3132	3.28445	2.77014	3.33822	4.02226	2.77066	0.358636	0.901213	0.420463	-1.16853	-0.394404	-0.067337	1.87642	0.018885	0.247936	-0.380604	-0.187474	0.098793	0.163964	-0.739611	-1.08402	1.06339	1.07701	-1.1072	-1.71246	-0.758496	-1.33196	1.44399	1.26449	-1.20599
13336439	AT1G06135	5.1493	4.44344	4.04276	4.81669	4.46574	3.95985	5.18722	5.10956	4.12481	4.45253	4.42322	4.80229	5.75486	5.32977	4.86386	4.87591	5.41945	4.86974	6.80648	5.23999	5.06206	6.35446	5.34763	5.45434	0.60556	0.88633	0.821102	0.059221	0.953706	0.909888	0.037912	0.666122	0.082052	-0.364156	-0.042517	0.842439	1.05161	-0.089777	0.198196	1.47855	-0.071813	0.58461	1.0137	-0.755899	0.116144	1.84271	-0.029296	-0.257829
13336443	AT1G06140	5.64135	6.16449	6.38506	6.06781	5.95495	6.15431	5.55036	6.93787	6.37821	6.57068	5.67815	6.09061	5.97488	6.49534	6.31409	6.14942	5.68432	6.32233	6.12675	6.23977	6.203	6.59034	6.26633	6.12987	0.333528	0.330855	-0.070971	0.081613	-0.270627	0.168018	-0.090994	0.77338	-0.006851	0.502869	-0.276796	-0.063693	0.151872	-0.255579	-0.111091	0.44092	0.582002	-0.192454	0.242866	-1.02896	-0.10424	-0.061949	0.858798	-0.128761
13336445	AT1G06160	7.9381	7.56186	6.82502	6.77582	6.69087	5.68054	7.95798	8.32661	7.92234	7.23011	6.742	5.0045	7.11352	6.42426	5.96445	5.61087	6.02674	4.86297	7.91029	7.71681	7.28886	7.3005	6.17658	5.29353	-0.824579	-1.13761	-0.860572	-1.16495	-0.664126	-0.817568	0.019884	0.764743	1.09733	0.45429	0.051129	-0.676033	0.796773	1.29256	1.32441	1.68963	0.149833	0.430561	0.776889	0.527815	0.227084	1.23534	0.098704	1.10659
13336448	AT1G06180	5.4522	4.94618	5.9241	5.56135	5.33001	5.58878	5.51119	5.50571	6.52373	5.88976	6.12693	7.01644	5.4522	5.66048	6.1639	6.02207	5.39808	6.18874	6.02152	6.53556	6.90661	6.40764	6.35655	7.12421	0	0.714297	0.239803	0.460714	0.068071	0.599966	0.058989	0.559529	0.599629	0.328403	0.796919	1.42766	0.569314	0.875085	0.742707	0.385576	0.958465	0.935467	0.510325	0.315556	0.143078	0.057173	0.161546	-0.492193
13336454	AT1G06210	7.04477	7.26517	7.11275	6.60118	7.33969	7.35693	7.14832	7.27813	7.151	6.57313	7.50001	7.51055	7.05662	7.53306	7.21493	6.444	7.55217	7.55535	7.27143	7.45269	7.68153	6.67654	7.3376	7.34728	0.011844	0.267893	0.102178	-0.157182	0.212489	0.198428	0.103547	0.012968	0.038255	-0.028046	0.160326	0.153623	0.214815	-0.080367	0.466601	0.23254	-0.214578	-0.208077	0.111268	-0.093335	0.428346	0.260586	-0.374904	-0.3617
13336462	AT1G06220	9.25385	9.49807	9.43857	9.25161	9.43188	9.60335	9.23867	9.50197	9.494	9.47084	9.52138	9.43634	9.47757	9.58447	9.50521	9.27134	9.4128	9.73897	9.35576	9.55469	9.47314	9.27002	9.35912	9.61815	0.22372	0.086399	0.066636	0.019729	-0.019077	0.135624	-0.015184	0.0039	0.055433	0.219225	0.089501	-0.167011	-0.121814	-0.029779	-0.032069	-0.001321	-0.053676	-0.120824	-0.10663	-0.033679	-0.087502	-0.220546	-0.143177	0.046187
13336474	AT1G06225	2.72374	3.09648	2.76346	2.67684	2.65176	2.94663	2.5046	2.84041	2.57437	2.82609	3.00709	2.75365	3.08161	3.06853	2.88165	3.38924	3.10635	2.86489	2.86489	3.21267	3.28677	2.65176	3.04756	3.06608	0.357864	-0.027946	0.118197	0.712397	0.45459	-0.081739	-0.219148	-0.256072	-0.189081	0.149252	0.355334	-0.192985	-0.216717	0.144135	0.405116	-0.73748	-0.05879	0.201191	0.002431	0.400207	0.594197	-0.886732	-0.414124	0.394176
13336476	AT1G06230	8.92419	8.93426	8.92452	9.1625	9.05815	8.84636	9.05815	8.83901	8.81124	9.05815	8.86165	8.95688	9.14039	9.13766	9.23935	9.33745	9.22169	9.05815	9.11582	9.26837	9.13218	9.33454	9.29954	9.1219	0.216192	0.203395	0.314823	0.174944	0.163533	0.211795	0.133959	-0.09526	-0.113282	-0.104347	-0.196506	0.11052	-0.024571	0.130713	-0.107163	-0.002906	0.07785	0.063747	-0.15853	0.225973	0.006119	0.101441	0.274356	-0.046773
13336488	AT1G06240	9.16273	9.60835	9.90418	9.88777	9.97377	9.87159	9.2883	9.60772	9.8269	9.93358	9.86862	9.70261	9.60878	9.58084	9.8779	9.92981	10.0231	9.90219	9.43792	9.65346	9.97511	9.88726	9.86378	9.77288	0.446053	-0.027511	-0.026287	0.042041	0.049296	0.030599	0.125571	-0.000633	-0.077279	0.045812	-0.105153	-0.168981	-0.170863	0.07262	0.097214	-0.04255	-0.159286	-0.129306	-0.296434	0.073253	0.174493	-0.088362	-0.054133	0.039675
13336498	AT1G06260	6.60132	7.13471	7.29899	7.26888	7.23058	6.64107	7.09608	7.09437	7.07543	7.14513	7.04165	6.50804	6.47661	6.46652	6.65819	7.09868	6.44414	6.4434	6.52634	6.50403	6.74116	6.52072	6.52373	6.25686	-0.124707	-0.66819	-0.640798	-0.170202	-0.786441	-0.197674	0.494764	-0.040344	-0.223552	-0.123754	-0.188931	-0.133032	0.049728	0.037506	0.082975	-0.577958	0.079591	-0.186543	-0.445036	0.07785	0.306527	-0.454204	0.268522	-0.053511
13336501	AT1G06290	9.78174	9.60848	9.54155	9.35611	9.76567	9.61626	9.70231	9.79877	9.55115	9.35075	9.74624	9.96262	10.0013	9.89267	9.94946	9.70346	9.91785	9.7629	9.98599	9.78506	9.61507	9.60519	10.0148	9.97634	0.219558	0.284196	0.40791	0.347346	0.152172	0.146644	-0.079436	0.19029	0.009603	-0.005365	-0.019435	0.346363	-0.015306	-0.10761	-0.334386	-0.098266	0.096954	0.213436	0.06413	-0.2979	-0.343989	-0.092901	0.116389	-0.132927
13336515	AT1G06310	3.36163	3.31171	3.36371	2.62427	2.95163	3.01686	3.02724	3.20006	2.94052	2.95953	3.41471	2.78114	2.97059	2.66719	3.51961	3.05392	2.97123	2.72774	3.18466	2.87339	3.14005	3.63843	3.20641	3.34998	-0.391044	-0.644516	0.155904	0.429645	0.019602	-0.289115	-0.334397	-0.111649	-0.423186	0.33526	0.463079	-0.235715	0.21407	0.206201	-0.379565	0.584511	0.235181	0.622239	0.548467	0.31785	0.043621	0.249251	-0.227898	0.857954
13336529	AT1G06320	3.12053	2.93974	3.09758	3.15775	2.95254	2.8817	2.85543	2.94724	2.66086	3.1163	3.16931	3.19079	3.36211	4.09448	3.11261	3.65056	3.05146	3.04539	3.1393	3.35999	3.62214	3.4014	2.99679	3.03776	0.241576	1.15474	0.015027	0.492803	0.09892	0.163689	-0.2651	0.007491	-0.436719	-0.041458	0.216775	0.309086	-0.222811	-0.734491	0.509526	-0.249154	-0.054668	-0.007631	0.042289	-0.741982	0.946245	-0.207696	-0.271443	-0.316717
13336534	AT1G06380	7.4778	7.46879	7.30838	7.45512	7.05415	7.15893	7.40931	7.48525	7.34994	7.00107	7.01775	6.99635	7.76877	7.42523	7.45749	7.02464	7.32088	7.61321	7.68946	7.57366	7.74316	7.12678	7.31877	7.44998	0.29097	-0.043564	0.149116	-0.430475	0.266723	0.454276	-0.068489	0.016463	0.041565	-0.454053	-0.036403	-0.162584	-0.079309	0.148433	0.285666	0.102137	-0.002101	-0.163233	-0.01082	0.13197	0.244101	0.55619	0.034302	-0.000649
13336537	AT1G06390	8.18785	8.19125	8.22527	8.47	8.12071	7.82218	8.26775	8.29961	8.10288	8.68414	7.75697	7.95814	8.41351	8.41616	8.50092	8.53228	8.49021	8.18813	8.57553	8.51452	8.46951	8.74717	8.31308	8.31853	0.225657	0.224909	0.275649	0.062281	0.369501	0.36595	0.079902	0.108366	-0.122388	0.214133	-0.363736	0.135965	0.162016	0.09836	-0.031403	0.214881	-0.177125	0.130402	0.082114	-0.010006	0.090985	0.000748	0.186611	-0.005563
13336555	AT1G06410	10.2145	10.2236	9.9407	10.1472	10.0606	10.0354	10.2236	10.1115	10.0443	10.213	9.93863	9.94057	10.5826	10.4798	10.2653	10.392	10.3677	10.4004	10.6119	10.5086	10.0999	10.5303	10.4125	10.4602	0.36808	0.25619	0.324637	0.24479	0.30709	0.36506	0.00909	-0.1121	0.103587	0.06577	-0.121957	-0.0948	0.02923	0.02874	-0.16546	0.13825	0.04479	0.05974	0.02014	0.14084	-0.269047	0.07248	0.166747	0.15454
13336562	AT1G06420	6.81978	6.52207	6.9824	6.93614	6.02558	6.51309	6.72066	6.96931	6.6105	5.81237	5.77679	6.28788	6.018	6.71098	6.21542	6.59711	6.46076	6.61286	6.14405	5.87851	6.82932	6.3541	6.41433	5.90847	-0.801783	0.188911	-0.766987	-0.339026	0.435184	0.099767	-0.09912	0.447244	-0.371903	-1.12377	-0.248793	-0.225216	0.126052	-0.832465	0.613905	-0.243013	-0.046434	-0.704396	0.225172	-1.27971	0.985808	0.880756	0.202359	-0.47918
13336567	AT1G06450	7.60616	8.268	7.57916	7.56007	7.58123	7.52747	7.6291	7.90315	8.10153	7.41624	7.53912	7.38238	8.28924	8.85339	8.50442	7.64318	7.4638	7.70147	8.08016	8.71496	8.4646	7.71968	7.42073	7.77524	0.683084	0.585393	0.925254	0.083104	-0.117434	0.174	0.022944	-0.364848	0.522367	-0.143837	-0.042115	-0.145097	-0.209078	-0.138431	-0.039816	0.076505	-0.043071	0.073763	-0.232022	0.226417	-0.562183	0.220342	-0.000956	0.21886
13336571	AT1G06470	9.61563	10.0101	9.90204	9.47209	9.44716	9.36781	9.62937	9.85404	9.98661	9.5038	9.48247	9.30167	9.57168	9.9488	9.78657	9.37223	9.25364	9.24597	9.56281	9.83276	9.72289	9.25689	9.34667	9.25412	-0.043944	-0.061311	-0.115477	-0.099859	-0.193518	-0.121835	0.013741	-0.156072	0.084567	0.03171	0.035314	-0.06614	-0.008877	-0.116041	-0.063679	-0.115342	0.093035	0.008144	-0.022618	0.040031	-0.148246	-0.147052	0.057721	0.074284
13336586	AT1G06480	3.33524	3.09723	4.32096	3.89791	4.90126	3.46694	4.02129	4.16561	3.15078	3.36823	3.33156	4.65867	3.67562	3.82429	4.21585	4.00814	4.28237	3.84665	4.20483	3.32793	3.56066	3.63762	4.17625	4.41249	0.340381	0.727059	-0.105113	0.110233	-0.618888	0.37971	0.686055	1.06838	-1.17018	-0.529685	-1.5697	1.19173	0.529213	-0.496368	-0.655184	-0.370523	-0.106123	0.565836	-0.156842	-1.56475	0.514992	0.159162	1.46358	-0.625899
13336588	AT1G06490	6.25758	6.0191	5.89504	6.21365	6.08626	6.08626	5.99164	6.0934	5.87796	6.15622	6.08626	5.55929	6.20279	6.07609	6.18978	6.33043	6.39338	6.04941	6.02395	6.29141	6.14709	5.84266	5.95228	5.83267	-0.054793	0.056991	0.294732	0.116783	0.307121	-0.036848	-0.265939	0.074295	-0.017082	-0.057429	0	-0.526971	-0.178835	0.215317	-0.042684	-0.487769	-0.441099	-0.216745	0.087104	0.141022	-0.025602	-0.43034	-0.441099	0.310226
13336626	AT1G06500	8.13537	8.01917	7.95251	7.88738	7.91389	7.68782	8.01685	7.88866	7.99616	7.89356	7.8795	7.58755	7.78378	7.97356	7.9543	7.94444	7.7126	7.88866	8.09255	7.99823	8.24326	7.99432	7.91651	7.79602	-0.351586	-0.045609	0.001789	0.057065	-0.20129	0.200838	-0.118515	-0.130514	0.04365	0.006182	-0.034395	-0.100268	0.30877	0.024669	0.288963	0.049876	0.203908	-0.092636	0.427285	0.155183	0.245313	0.043694	0.238303	0.007632
13336634	AT1G06510	6.96889	6.76	7.17285	6.88908	7.05234	6.93312	7.06758	6.76281	7.28326	6.79084	7.23325	7.0529	7.03252	7.12757	6.99251	7.18998	7.01377	7.19601	7.13858	7.33629	7.33313	7.03664	7.25846	7.20775	0.063632	0.367568	-0.180348	0.300901	-0.038566	0.262896	0.098692	0.002815	0.110408	-0.098238	0.18091	0.119779	0.10606	0.208722	0.340629	-0.153345	0.244689	0.011732	0.007368	0.205907	0.230221	-0.055107	0.063779	-0.108047
13336641	AT1G06530	10.2492	10.3036	10.3775	10.4434	10.2702	10.203	10.347	10.4106	10.3587	10.5334	10.2154	10.3437	10.5322	10.3974	10.2803	10.6225	10.3126	10.3745	10.491	10.3422	10.5685	10.5472	10.3522	10.3159	0.28307	0.09386	-0.09717	0.17912	0.04238	0.17144	0.09784	0.10702	-0.0188	0.09	-0.05484	0.14068	-0.04125	-0.05526	0.28823	-0.07535	0.0396	-0.05856	-0.13909	-0.16228	0.30703	-0.16535	0.09444	-0.19924
13336644	AT1G06560	8.79468	8.97302	8.94037	9.15376	8.55143	8.48745	8.65274	8.94047	9.04192	9.13451	8.49638	8.23191	8.69142	8.87385	8.87325	8.71941	8.55991	8.73131	8.45331	8.90485	8.91704	8.88724	8.46172	8.51757	-0.10326	-0.099169	-0.067114	-0.434357	0.008479	0.243861	-0.14194	-0.03255	0.101556	-0.019256	-0.05505	-0.25554	-0.23811	0.031001	0.043787	0.16783	-0.098188	-0.213738	-0.09617	0.063551	-0.057769	0.187086	-0.043138	0.041802
13336657	AT1G06620	5.88209	5.0126	5.68784	5.27649	5.33293	5.60389	6.47507	5.47049	6.33018	6.64029	7.83372	8.61519	6.68103	6.12808	6.41689	6.06802	6.74413	7.28069	7.15327	6.65774	7.13875	7.24524	8.15635	8.72324	0.798941	1.11548	0.729056	0.79153	1.4112	1.6768	0.592989	0.457884	0.642344	1.36381	2.50079	3.01131	0.472249	0.529662	0.721859	1.17723	1.41223	1.44255	-0.12074	0.071778	0.079515	-0.186582	-1.08856	-1.56876
13336662	AT1G06630	7.41364	7.13704	7.30838	7.30462	7.1879	6.91797	7.02657	7.10296	7.00763	7.4324	7.15374	6.72837	7.01895	6.64426	6.11229	6.57784	6.47035	6.89468	6.60363	6.68154	6.99073	6.84468	6.52906	6.28268	-0.39469	-0.49278	-1.19609	-0.72678	-0.717548	-0.023288	-0.387069	-0.034083	-0.300751	0.127779	-0.034161	-0.189595	-0.415323	0.037273	0.878433	0.266839	0.058709	-0.612003	-0.028254	0.071356	1.17918	0.13906	0.09287	-0.422408
13336673	AT1G06640	8.57199	8.33211	8.45472	7.92933	8.39379	8.13514	8.49135	8.38041	8.18896	8.09042	8.87667	9.00469	4.55941	4.57531	4.11857	4.67473	4.86091	5.11874	4.58898	4.2446	4.30247	4.55343	5.57623	4.83758	-4.01258	-3.7568	-4.33615	-3.2546	-3.53288	-3.0164	-0.080642	0.048297	-0.265754	0.161089	0.482876	0.86955	0.029568	-0.330706	0.183899	-0.121299	0.71532	-0.281161	0.11021	-0.379003	0.449653	-0.282388	0.232444	-1.15071
13336681	AT1G06645	7.93216	8.28974	8.36031	8.34914	8.33081	7.87493	8.30663	7.99191	8.51246	8.34003	8.11631	8.0653	8.33122	8.16717	8.67581	8.89233	8.34624	8.06282	8.22621	8.41567	8.64488	9.05893	8.35904	8.16023	0.39906	-0.122572	0.315501	0.543193	0.015429	0.187891	0.37447	-0.297835	0.152151	-0.009111	-0.214508	0.190373	-0.105011	0.248497	-0.030934	0.166606	0.012797	0.097411	-0.479481	0.546332	-0.183085	0.175717	0.227305	-0.092962
13336687	AT1G06650	9.80722	9.76103	9.78338	9.69938	10.0829	10.0345	9.96798	9.8251	9.80397	9.86406	10.0774	10.2297	9.12988	9.39681	9.24181	9.57857	9.76046	10.0016	9.49606	9.47723	9.21275	9.86592	9.97436	9.94901	-0.677348	-0.364214	-0.54157	-0.120816	-0.322405	-0.03284	0.160755	0.064079	0.020586	0.164671	-0.00544	0.19529	0.366182	0.080417	-0.029065	0.287351	0.213908	-0.052608	0.205427	0.016338	-0.049651	0.12268	0.219348	-0.247898
13336694	AT1G06670	9.15028	9.34195	9.40917	9.53889	9.17202	9.42454	9.35943	9.37079	9.54183	9.41466	9.3043	9.37258	9.03192	9.03843	9.13284	9.45066	8.88807	9.0321	8.99805	9.17303	9.14567	9.11703	8.92354	9.29674	-0.118358	-0.303515	-0.276322	-0.088228	-0.283945	-0.392437	0.209149	0.028845	0.132666	-0.124228	0.132281	-0.051963	-0.033872	0.134599	0.012826	-0.333629	0.035469	0.264634	-0.243021	0.105754	-0.11984	-0.209401	-0.096812	0.316597
13336710	AT1G06680	11.4896	11.6142	11.5284	10.9984	11.6712	11.7137	11.5576	11.502	11.502	10.9614	11.6184	11.4694	11.5592	11.5389	11.4761	11.0282	11.6395	11.6486	11.5378	11.506	11.3928	10.994	11.7199	11.4797	0.0696	-0.07529	-0.05229	0.02981	-0.03169	-0.06509	0.06797	-0.11223	-0.02643	-0.03707	-0.05275	-0.24424	-0.02145	-0.03296	-0.08331	-0.03424	0.08045	-0.16883	-0.08942	0.07927	-0.05688	0.00283	0.1332	0.07541
13336719	AT1G06730	7.52839	7.73833	7.75595	7.9494	7.37885	7.55132	7.52847	7.56542	7.4071	7.70118	7.51544	7.34096	7.46667	7.56721	7.52839	7.55187	7.46937	7.52949	7.16929	7.22133	7.48889	7.64428	7.27603	7.58774	-0.061722	-0.171114	-0.227565	-0.39753	0.090518	-0.021833	7.7e-05	-0.172908	-0.348857	-0.248222	0.136595	-0.210364	-0.297375	-0.345883	-0.039501	0.092409	-0.193337	0.05825	-0.297452	-0.172975	0.309356	0.340631	-0.329932	0.268614
13336727	AT1G06750	4.9872	5.28196	5.04262	4.90034	5.23321	5.03348	5.17359	5.61641	4.99113	4.72721	4.93124	4.60497	5.06105	5.05887	4.92142	5.44932	5.30744	5.21636	5.66003	5.04516	5.27304	4.77203	5.56855	4.77117	0.07385	-0.223094	-0.121197	0.548975	0.074231	0.182885	0.186389	0.334452	-0.05149	-0.173129	-0.301961	-0.42851	0.598978	-0.013711	0.351622	-0.677284	0.26111	-0.445189	0.412589	-0.348163	0.403112	-0.504155	0.563071	-0.016679
13336740	AT1G06780	8.14769	8.18996	8.13585	8.11627	8.14816	8.06863	8.1077	8.16028	8.38264	7.92059	8.10889	8.34256	8.10325	8.3518	8.22221	8.1821	7.93903	8.0244	8.17093	8.29291	8.2804	7.92248	7.8196	7.91024	-0.044444	0.161837	0.086359	0.06583	-0.209128	-0.044229	-0.039989	-0.029677	0.246789	-0.195675	-0.039275	0.273931	0.067678	-0.05889	0.058186	-0.259615	-0.119432	-0.114161	0.107667	-0.029213	-0.188603	-0.06394	-0.080157	-0.388092
13336755	AT1G06790	9.79865	9.8345	9.86506	9.49151	9.3823	9.63551	9.53626	9.83574	10.0884	9.51867	9.62386	9.64633	9.83182	9.88184	10.0137	9.58339	9.73841	10.0148	9.6169	10.0038	10.0404	9.6189	9.91043	9.98599	0.033175	0.047337	0.148645	0.091886	0.356113	0.379274	-0.262394	0.001243	0.223355	0.027164	0.24156	0.010824	-0.214927	0.121962	0.02671	0.035511	0.172022	-0.028789	0.047467	0.120719	-0.196645	0.008347	-0.069538	-0.039613
13336767	AT1G06830	7.13378	5.96406	5.21405	7.13036	7.34562	5.93503	6.23599	5.0579	5.97806	6.79916	6.82374	5.73916	6.32513	5.78777	5.49637	6.13783	6.67069	5.97769	6.56436	6.10327	5.50491	6.14034	6.65678	6.13485	-0.808651	-0.176288	0.282323	-0.992538	-0.674926	0.042656	-0.897796	-0.906167	0.764014	-0.331203	-0.521878	-0.195869	0.239227	0.315498	0.008541	0.002516	-0.013913	0.157158	1.13702	1.22167	-0.755473	0.333719	0.507965	0.353027
13336771	AT1G06850	7.05116	7.08558	7.22419	7.07859	6.59446	6.48256	6.96296	6.54685	7.30173	7.19287	6.81731	6.17201	6.82141	7.12055	6.9992	7.08149	6.56885	6.21476	6.75066	6.90391	6.93313	7.01769	6.13861	5.9998	-0.229752	0.034969	-0.224987	0.002906	-0.025606	-0.267798	-0.088201	-0.538734	0.077538	0.114287	0.222857	-0.310555	-0.070743	-0.216637	-0.066071	-0.063802	-0.430242	-0.214964	0.017458	0.322097	-0.143609	-0.178089	-0.653099	0.095591
13336779	AT1G06870	8.41703	8.32752	8.50269	8.32681	8.64297	8.46437	8.33583	8.38462	8.57057	8.584	8.44111	8.39167	8.78686	8.66827	8.77815	8.76189	8.78202	8.71395	8.58815	8.57623	8.93889	8.75965	8.73338	8.7438	0.369828	0.340744	0.275454	0.435082	0.139047	0.249579	-0.081205	0.057102	0.067874	0.257198	-0.201863	-0.072692	-0.198711	-0.09204	0.160746	-0.002239	-0.048643	0.029859	-0.117506	-0.149142	0.092872	-0.259437	0.15322	0.102551
13336787	AT1G06910	7.80891	7.86457	7.91376	8.15722	8.22649	8.09932	7.97728	7.91681	8.03386	8.05908	8.11956	7.99729	7.8994	8.06231	8.15643	8.35111	8.33936	8.17355	7.79404	8.10183	8.24238	8.04097	8.18079	8.16735	0.090484	0.197732	0.242677	0.193891	0.112875	0.074232	0.168366	0.052233	0.120104	-0.098139	-0.106928	-0.102028	-0.105351	0.039525	0.085944	-0.310145	-0.158572	-0.0062	-0.273717	-0.012708	-0.03416	-0.212006	-0.051644	0.095828
13336795	AT1G06923	3.76994	3.8877	3.96226	3.93516	4.22501	3.93516	3.91358	4.37848	3.59305	3.72302	3.58087	3.84333	4.23889	3.93516	4.04524	3.88879	3.59342	3.6134	4.11942	4.00391	4.22005	3.80189	3.9083	3.45587	0.468948	0.04746	0.082982	-0.046374	-0.631587	-0.321764	0.143635	0.490775	-0.369207	-0.212141	-0.644135	-0.091832	-0.119465	0.068748	0.174809	-0.086896	0.31488	-0.157531	-0.2631	-0.422027	0.544016	0.125245	0.959015	-0.065699
13336800	AT1G06930	3.23191	3.04544	3.07673	3.24788	3.04081	3.09413	3.30756	3.27493	3.26864	3.30692	3.0146	3.16068	3.35215	3.20316	3.39738	3.28397	3.08625	3.0564	3.51086	3.46834	3.22028	3.56722	3.23807	3.25739	0.120232	0.157717	0.320643	0.036083	0.045441	-0.037728	0.075649	0.22949	0.191911	0.059039	-0.026207	0.066549	0.158715	0.265184	-0.177094	0.283258	0.151816	0.200986	0.083066	0.035694	-0.369005	0.224219	0.178023	0.134437
13336804	AT1G06960	7.83522	7.15438	7.20626	8.009	8.07418	7.64369	7.79115	7.22749	7.21511	8.15366	7.71458	7.32503	7.70875	7.53555	7.42907	8.12481	7.85738	8.2513	7.84093	7.53712	7.74673	8.15394	7.93801	7.90415	-0.12647	0.381175	0.222813	0.115815	-0.216799	0.607605	-0.04407	0.073117	0.008859	0.144666	-0.359592	-0.318664	0.132181	0.001567	0.317658	0.029128	0.080629	-0.347152	0.176251	-0.07155	0.308799	-0.115538	0.440221	-0.028488
13336813	AT1G06970	4.67023	4.98438	4.57014	5.00782	4.44647	4.6769	4.12486	5.12369	4.68535	4.60674	4.85285	4.29909	5.25291	4.43964	4.69744	4.33711	5.0064	4.67626	5.21893	5.02586	4.77398	4.87996	5.01638	4.71512	0.582678	-0.544746	0.1273	-0.670713	0.559932	-0.000633	-0.545371	0.139308	0.115206	-0.401085	0.406375	-0.377809	-0.033981	0.586226	0.076536	0.542853	0.009974	0.038856	0.51139	0.446918	-0.03867	0.943938	-0.396401	0.416665
13336817	AT1G06990	3.07418	3.09156	2.86748	3.01636	3.11761	2.99767	3.04627	3.15797	2.88745	3.01961	3.19755	2.99505	3.30556	3.36969	3.0271	2.93761	3.35422	2.96245	2.90797	3.11416	3.22517	3.36931	3.08803	3.14494	0.231379	0.278131	0.15961	-0.078753	0.236615	-0.035218	-0.027919	0.066407	0.019965	0.003245	0.079943	-0.002623	-0.397591	-0.255533	0.198071	0.431701	-0.266189	0.182491	-0.369672	-0.32194	0.178106	0.428456	-0.346132	0.185114
13336822	AT1G07010	9.39962	9.40174	9.62026	10.2913	10.4776	10.5224	9.50339	9.18346	9.7305	10.3643	10.4671	10.4713	9.75797	9.26268	9.53607	10.4009	10.4527	10.4671	9.69084	9.26102	9.56204	10.4502	10.5107	10.5433	0.35835	-0.139064	-0.084192	0.10961	-0.02494	-0.05524	0.10377	-0.218278	0.110234	0.07297	-0.01049	-0.05104	-0.067132	-0.001657	0.025966	0.0493	0.058	0.07616	-0.170902	0.216621	-0.084268	-0.02367	0.06849	0.1272
13336838	ATH-MIR84	4.27159	3.98273	4.95387	3.95634	3.83469	3.74231	4.13771	4.19024	4.04431	3.8616	4.00251	3.97813	4.30021	4.44325	5.35692	5.00167	4.43835	4.23379	3.89487	4.75606	5.22394	4.86085	3.78447	4.14278	0.028622	0.460521	0.403052	1.04533	0.603664	0.491483	-0.133878	0.20751	-0.909558	-0.094746	0.167824	0.235824	-0.405338	0.312807	-0.132984	-0.140823	-0.653888	-0.091013	-0.27146	0.105297	0.776574	-0.046077	-0.821712	-0.326837
13336840	AT1G07070	6.49027	5.68186	6.31127	6.1465	5.95017	6.2845	5.96011	5.97838	6.38644	6.1245	5.8741	5.61942	6.78915	6.59001	6.56767	6.54604	6.51522	6.99347	6.40719	6.83615	7.15618	6.91535	6.10356	7.12469	0.298886	0.908155	0.256396	0.399541	0.56505	0.708971	-0.530153	0.296528	0.075167	-0.021999	-0.076076	-0.665082	-0.381958	0.246141	0.588515	0.369309	-0.411665	0.131215	0.148195	-0.050387	0.513348	0.391308	-0.335589	0.796297
13336846	AT1G07080	10.9981	11.0914	11.1597	11.0014	11.2839	11.2823	10.9644	11.1733	11.2646	10.982	11.3175	11.3353	11.4439	11.6868	11.6621	11.5089	11.7829	11.7454	11.5037	11.7018	11.6195	11.5973	11.6879	11.6922	0.44583	0.59545	0.50234	0.50752	0.49904	0.46314	-0.03373	0.08193	0.10487	-0.01937	0.03361	0.053	0.05976	0.015	-0.04256	0.08836	-0.09501	-0.05322	0.09349	-0.06693	-0.14743	0.10773	-0.12862	-0.10622
13336854	AT1G53220	3.91688	4.96755	4.67558	4.28688	4.42815	4.82753	4.58338	5.43914	3.73735	3.98141	3.89157	4.88578	5.61243	5.23031	5.06705	3.80476	4.49494	4.36303	4.3951	4.16972	3.65248	4.34651	5.84108	4.57197	1.69555	0.26275	0.391473	-0.48212	0.066783	-0.464496	0.666498	0.47158	-0.938228	-0.305464	-0.536586	0.058254	-1.21733	-1.06058	-1.41457	0.541754	1.34615	0.208941	-1.88383	-1.53216	-0.476338	0.847218	1.88273	0.150687
13336856	AT1G07120	5.89209	5.53296	5.85971	5.39269	5.97535	5.5979	5.69427	5.69502	5.83309	5.04751	5.49909	5.6733	6.36481	6.32676	6.45073	6.66875	6.46244	6.46099	5.98858	6.13735	6.10912	6.19128	6.19567	5.94914	0.472714	0.793796	0.591019	1.27607	0.487084	0.86309	-0.197827	0.162057	-0.026621	-0.345176	-0.476265	0.075391	-0.376223	-0.189411	-0.341606	-0.477475	-0.26677	-0.51185	-0.178396	-0.351468	-0.314985	-0.132299	0.209495	-0.587241
13336862	AT1G07130	7.42139	6.63334	6.52172	6.83618	5.94293	5.50809	7.68581	6.90324	6.85319	7.10847	5.71336	6.09422	7.70874	7.0131	6.82966	7.22052	6.43495	6.45311	7.82065	7.05867	6.78796	7.61088	6.57245	6.99945	0.287345	0.379764	0.307943	0.384345	0.492022	0.945021	0.264421	0.269902	0.331473	0.272292	-0.229574	0.586129	0.111909	0.045568	-0.041702	0.390361	0.137499	0.546343	-0.152512	-0.224334	-0.373175	0.118069	0.367073	-0.039786
13336866	AT1G07170	7.78055	7.57718	7.67795	7.38062	7.42262	7.1631	7.71031	7.51749	7.84666	7.64257	7.36892	7.24082	8.14082	8.37277	8.12091	7.79227	7.84454	7.67484	8.2194	8.02022	8.02861	7.9209	7.97538	7.59469	0.360271	0.795587	0.442963	0.411651	0.421926	0.511741	-0.07024	-0.059694	0.168707	0.261954	-0.053697	0.07772	0.07858	-0.352552	-0.092301	0.12863	0.130833	-0.080151	0.14882	-0.292858	-0.261008	-0.133324	0.18453	-0.157871
13336876	AT1G07175	5.91325	5.53047	5.06883	5.65307	5.15101	5.47989	5.01595	5.20693	4.8407	5.02105	5.46394	4.99812	5.77355	5.27221	5.71113	5.55001	5.09218	5.15101	5.68719	5.40757	5.18461	5.28913	5.3156	5.36368	-0.139697	-0.258263	0.642301	-0.103059	-0.058828	-0.328882	-0.897306	-0.323545	-0.228125	-0.632021	0.312926	-0.481774	-0.086361	0.135362	-0.526523	-0.260884	0.223418	0.212667	0.810945	0.458907	-0.298398	0.371137	-0.089508	0.694441
13336879	AT1G07180	7.92686	6.63174	5.70244	7.12312	9.48346	9.40438	8.04849	6.44995	5.75302	7.27626	9.26574	9.05531	8.45738	7.08083	5.1491	6.98257	9.30991	9.41498	8.33629	7.44165	5.86369	7.31219	9.29206	9.22526	0.530521	0.44909	-0.55334	-0.14055	-0.173555	0.010598	0.121628	-0.181791	0.050582	0.153147	-0.217724	-0.349072	-0.121089	0.360821	0.714594	0.329622	-0.017841	-0.189719	-0.242717	0.542612	0.664012	0.176475	0.199883	0.159353
13336890	AT1G07190	3.58611	3.50211	3.29716	3.64907	3.45382	3.85203	3.47155	3.71696	3.58611	3.66762	3.76132	3.53568	3.55429	3.47162	3.73228	3.64832	3.44443	3.45705	3.51149	3.61515	3.92334	3.51826	3.41915	3.82985	-0.031828	-0.030486	0.435123	-0.000754	-0.009395	-0.394976	-0.114561	0.214852	0.288954	0.018545	0.307496	-0.31635	-0.042799	0.143529	0.19106	-0.130057	-0.025275	0.372793	0.071762	-0.071323	-0.097894	-0.148602	-0.332771	0.689143
13336892	AT1G07210	9.31155	9.2938	9.16995	9.29922	8.96592	9.12894	9.11494	9.10982	9.23363	9.28308	9.18268	9.07196	9.27053	9.18516	9.00985	9.19542	8.8708	9.22194	9.16297	9.06806	9.1712	9.20561	9.01328	9.25624	-0.041017	-0.108633	-0.160093	-0.103803	-0.095118	0.092996	-0.196605	-0.18398	0.063684	-0.016141	0.216761	-0.056978	-0.107559	-0.117101	0.161346	0.010195	0.142474	0.034305	0.089046	0.066879	0.097662	0.026336	-0.074287	0.091283
13336900	AT1G07240	8.04914	7.44247	7.1175	7.90384	7.65473	7.01355	7.86314	7.65387	7.36698	7.85302	7.38855	6.47269	7.82603	7.40977	6.94721	7.68506	7.394	6.82221	7.90716	7.52045	7.39799	7.76925	7.23426	6.62344	-0.223112	-0.032705	-0.170292	-0.218783	-0.260734	-0.191347	-0.185997	0.211396	0.249475	-0.050825	-0.266178	-0.540859	0.081128	0.11068	0.450787	0.084188	-0.159743	-0.198765	0.267125	-0.100716	0.201312	0.135013	0.106435	0.342094
13336904	AT1G07250	9.62345	9.61905	9.6501	9.73625	9.95552	9.77013	9.79698	9.74649	9.52	9.72632	9.80287	9.9117	9.69376	9.84887	9.6924	10.0006	9.99925	10.0758	9.92572	9.67776	9.66017	9.87888	10.0591	10.0412	0.070311	0.229816	0.042297	0.264357	0.04373	0.305696	0.173527	0.127434	-0.130099	-0.009931	-0.152658	0.141569	0.231961	-0.171111	-0.032225	-0.121733	0.059815	-0.03467	0.058434	-0.298545	0.097874	-0.111802	0.212473	-0.176239
13336908	AT1G07280	8.7017	9.00599	9.06306	8.27956	8.72322	8.90342	8.84966	8.75222	9.15825	8.10141	8.63017	8.89385	9.02289	9.35328	9.35066	8.66775	9.25954	9.56427	9.28265	9.43159	9.3499	8.69865	9.21618	9.34438	0.321191	0.347298	0.287603	0.388196	0.536322	0.660844	0.14796	-0.253768	0.095189	-0.178151	-0.093055	-0.009569	0.259754	0.0783	-0.000758	0.030896	-0.043362	-0.219883	0.111794	0.332068	-0.095947	0.209047	0.049693	-0.210314
13336915	AT1G07320	10.8996	10.9695	11.1178	11.0284	11.0187	11.0273	10.756	10.8293	11.0315	11.1909	10.8227	10.5084	10.8748	10.91	10.9613	10.9259	10.9026	11.0064	10.8934	10.8089	10.8337	10.9597	10.8823	10.7296	-0.02482	-0.05957	-0.15648	-0.10253	-0.11617	-0.02098	-0.1436	-0.14025	-0.08631	0.16248	-0.196	-0.51892	0.0186	-0.10109	-0.12761	0.03386	-0.02022	-0.27676	0.1622	0.03916	-0.0413	-0.12862	0.17578	0.24216
13336921	AT1G07330	3.97906	4.52975	4.04977	4.4505	4.25122	4.07055	4.17789	4.00941	3.81295	4.61819	3.98517	4.14619	4.12579	4.05784	4.00208	4.3483	4.08408	4.07274	3.67666	4.0954	4.38052	3.81497	4.41875	3.99556	0.146729	-0.47191	-0.047689	-0.102198	-0.167142	0.002185	0.198822	-0.520341	-0.236822	0.167693	-0.266047	0.07563	-0.449138	0.037559	0.378439	-0.533331	0.334666	-0.077176	-0.64796	0.5579	0.615261	-0.701024	0.600713	-0.152806
13336926	AT1G07340	3.25799	3.69821	3.13693	3.49003	3.53294	3.621	3.42749	3.51796	3.38481	3.1474	3.48894	3.16326	3.79726	3.63588	3.73398	3.88039	3.82407	3.49869	3.77534	4.10448	3.69161	3.71247	3.65571	3.88051	0.539272	-0.062332	0.597052	0.390361	0.291127	-0.122313	0.169501	-0.180249	0.247882	-0.342623	-0.043997	-0.457739	-0.021924	0.468608	-0.042369	-0.167914	-0.168353	0.381822	-0.191425	0.648857	-0.290251	0.174709	-0.124356	0.839561
13336933	AT1G07370	7.62567	7.50043	7.71868	7.87909	7.71237	8.15091	7.18088	7.13599	7.49608	7.17291	7.99156	7.6674	7.48389	7.73508	7.70578	8.04758	8.10581	8.20013	7.42725	7.44388	7.71718	8.05459	8.11904	8.31466	-0.141776	0.234648	-0.012902	0.168487	0.393446	0.049215	-0.444784	-0.364438	-0.222603	-0.706185	0.279192	-0.483514	-0.056646	-0.291195	0.0114	0.007007	0.01323	0.114534	0.388138	0.073243	0.234003	0.713192	-0.265962	0.598048
13336940	AT1G07390	6.07806	5.61533	5.7335	5.68594	6.00058	5.77974	6.29867	6.22703	6.01383	5.80622	5.41325	5.74963	6.96348	6.3457	6.16442	6.16667	6.74875	6.50218	6.85193	6.74441	6.20273	5.82338	5.89002	6.53423	0.88542	0.730378	0.430917	0.480733	0.748169	0.722443	0.220613	0.611706	0.280329	0.120283	-0.587325	-0.030112	-0.111545	0.398703	0.038305	-0.343289	-0.858733	0.032042	-0.332158	-0.213003	-0.242024	-0.463572	-0.271408	0.062154
13336955	AT1G07400	6.02447	6.76504	6.74264	4.4401	5.72621	5.51706	6.84516	6.66803	7.08614	3.6983	5.88978	5.75346	6.78379	7.61658	7.00884	5.00166	6.30922	5.89086	7.95034	7.64029	7.68231	5.14488	6.60904	6.11998	0.759321	0.851536	0.266206	0.561558	0.58301	0.3738	0.820699	-0.097014	0.343504	-0.741807	0.163577	0.236401	1.16655	0.023713	0.673462	0.143214	0.299823	0.229128	0.345851	0.120727	0.329958	0.885021	0.136246	-0.007273
13336959	AT1G07410	6.15706	5.59497	5.7023	5.97469	5.74388	5.84275	5.83723	6.22021	5.86655	5.57336	6.08625	5.3567	6.69751	6.88746	6.894	6.15706	6.49429	6.23883	6.44958	6.88072	7.01031	6.24697	6.5359	6.34827	0.540449	1.29248	1.1917	0.182373	0.750412	0.396078	-0.31983	0.625239	0.164251	-0.401326	0.342372	-0.486044	-0.247922	-0.006734	0.116312	0.089916	0.04161	0.109445	0.071908	-0.631973	-0.047939	0.491242	-0.300762	0.595489
13336964	AT1G07420	10.414	10.6343	10.3815	10.1091	9.2356	9.35203	10.3809	10.3683	10.3086	9.97263	9.16499	9.24224	10.359	10.6899	10.4642	10.1411	9.31849	9.64069	10.3311	10.5238	10.4779	10.1351	9.2525	9.70278	-0.05493	0.05568	0.08268	0.03198	0.082882	0.288659	-0.03311	-0.26591	-0.07298	-0.136478	-0.070616	-0.109791	-0.02793	-0.16617	0.01371	-0.00603	-0.06599	0.062091	0.00518	0.09974	0.08669	0.130448	0.004626	0.171882
13336976	AT1G07460	3.63733	3.56959	3.41433	3.77791	3.83189	3.60535	3.43464	3.75944	4.1639	3.66071	3.71426	3.78272	3.78747	4.0545	3.98295	4.36006	4.12579	4.10068	3.82069	4.42964	4.22675	4.52455	3.47876	3.7871	0.150143	0.484904	0.568625	0.582154	0.293903	0.495325	-0.202687	0.189842	0.749578	-0.117196	-0.117629	0.17737	0.033215	0.375142	0.243797	0.164483	-0.647037	-0.313574	0.235902	0.1853	-0.505781	0.281679	-0.529408	-0.490944
13336978	AT1G07470	8.67353	8.39913	8.77569	9.38463	8.70003	8.97147	8.69745	8.49291	8.54272	9.28554	8.84298	9.16602	8.96091	8.57884	8.82572	9.50342	9.02623	9.22585	8.97934	8.83037	8.54945	9.59999	8.91352	9.51447	0.287377	0.17971	0.050032	0.118789	0.326203	0.254377	0.023919	0.093775	-0.232972	-0.099084	0.142956	0.194545	0.018435	0.251526	-0.276274	0.096571	-0.112708	0.288618	-0.005484	0.157751	-0.043302	0.195655	-0.255664	0.094073
13336987	AT1G07476	2.51795	2.28781	2.30698	2.38706	2.5663	2.32238	2.49267	2.48751	2.2648	2.55505	2.57219	2.57138	2.77989	2.51581	2.69638	2.71032	2.59452	2.27053	2.57841	2.66787	2.98162	2.4753	2.42952	2.37732	0.26194	0.228002	0.389397	0.323258	0.028223	-0.051846	-0.025283	0.199701	-0.042181	0.167985	0.005893	0.249006	-0.201484	0.152066	0.28524	-0.235018	-0.165002	0.10679	-0.176201	-0.047635	0.327421	-0.403003	-0.170895	-0.142216
13336991	AT1G07485	6.52166	7.12259	8.00013	8.54323	8.05542	7.32789	7.02641	6.48229	7.3819	8.30859	7.73791	5.72901	6.71659	7.32831	8.03864	8.63837	8.25036	7.29545	6.37898	7.08259	7.68027	8.32789	7.76018	6.79667	0.194937	0.20572	0.038514	0.095139	0.194946	-0.03244	0.504754	-0.640306	-0.618229	-0.234646	-0.317506	-1.59888	-0.337616	-0.245725	-0.358378	-0.310475	-0.490183	-0.498774	-0.84237	0.394581	0.259851	-0.075829	-0.172677	1.1001
13336996	AT1G07510	8.86291	8.76145	8.8915	8.58324	9.10299	9.02667	8.91727	8.84023	8.87631	8.44689	9.04931	9.3357	8.84794	9.07334	8.83447	8.61453	9.08648	9.14607	8.80964	8.78871	8.75199	8.66884	8.99224	9.23221	-0.014974	0.31188	-0.057026	0.031289	-0.016504	0.119409	0.054353	0.07878	-0.015184	-0.136347	-0.053684	0.309035	-0.038302	-0.284628	-0.082479	0.05431	-0.094242	0.086133	-0.092655	-0.363408	-0.067295	0.190657	-0.040558	-0.222902
13337007	AT1G07560	3.88178	3.42797	3.2394	3.00061	3.02515	3.00229	3.40452	3.37057	3.13781	2.68844	3.17959	3.11662	3.07004	3.51105	3.45874	3.49066	3.15744	3.3214	3.79835	3.64048	2.97928	3.40395	3.05049	3.27493	-0.811738	0.083083	0.219336	0.490053	0.13229	0.319108	-0.477256	-0.057402	-0.101598	-0.312172	0.154448	0.114327	0.728313	0.129428	-0.479463	-0.086706	-0.10695	-0.046464	1.20557	0.18683	-0.377865	0.225466	-0.261398	-0.160791
13337021	AT1G07610	8.33445	6.90282	5.89544	7.29348	8.43263	9.35024	7.72847	6.72369	6.64426	7.22732	8.82086	9.70628	8.02598	6.74925	6.66753	7.52956	8.79614	9.71974	7.86629	7.14819	6.99802	8.03312	8.70735	10.1233	-0.308466	-0.153572	0.772085	0.236079	0.363511	0.369494	-0.605983	-0.179128	0.748817	-0.066162	0.388229	0.356035	-0.159693	0.398948	0.330488	0.503555	-0.088796	0.403551	0.44629	0.578076	-0.418329	0.569717	-0.477025	0.047516
13337025	AT1G07630	6.64855	5.97776	5.95074	6.08507	6.2805	6.35977	6.60412	6.20751	6.22311	6.48139	6.56377	7.01254	6.87203	6.70342	6.43692	6.69659	6.82819	6.93855	7.11489	6.88635	6.56401	6.89947	7.0572	7.2121	0.223483	0.725659	0.486187	0.611522	0.547691	0.57878	-0.044434	0.229751	0.27237	0.396321	0.283275	0.652774	0.242851	0.182932	0.127084	0.202881	0.229016	0.273551	0.287285	-0.046819	-0.145286	-0.19344	-0.054259	-0.379223
13337032	AT1G07660	7.3767	6.95598	7.12674	7.10353	7.39426	7.13462	7.08763	6.80867	7.06276	7.02384	6.79021	6.83785	5.498	5.70485	5.48704	5.61307	6.13323	5.80631	6.00815	6.56177	5.89698	5.84728	5.90122	6.00402	-1.8787	-1.25113	-1.63969	-1.49046	-1.26104	-1.32832	-0.28907	-0.147311	-0.063982	-0.079692	-0.604056	-0.296775	0.510148	0.85692	0.409933	0.234209	-0.232008	0.197717	0.799218	1.00423	0.473915	0.313901	0.372048	0.494492
13337036	AT1G07680	2.9409	2.70049	2.71457	2.99696	2.89957	2.49601	2.82128	2.83101	2.82401	2.56142	2.58526	2.97387	2.87726	3.02809	2.65694	3.16688	2.61199	2.82917	2.93584	3.0335	2.99316	3.15782	2.96539	2.48248	-0.063643	0.327596	-0.057629	0.169919	-0.287573	0.333156	-0.11962	0.130518	0.109438	-0.435549	-0.314308	0.477857	0.058584	0.00541	0.336219	-0.009061	0.3534	-0.346688	0.178204	-0.125108	0.226781	0.426488	0.667708	-0.824545
13337042	AT1G07690	3.71194	3.43566	3.47876	3.57013	3.42837	3.6677	3.37344	3.57639	3.2091	3.47984	3.30873	3.25629	4.36398	4.3266	3.79723	3.28307	4.04511	4.46005	4.68344	3.57261	4.1664	4.8674	3.34165	3.70492	0.652047	0.890939	0.318465	-0.287058	0.616738	0.792345	-0.338496	0.140736	-0.269658	-0.09029	-0.119632	-0.411407	0.31946	-0.753982	0.369174	1.58433	-0.703457	-0.75513	0.657956	-0.894718	0.638832	1.67462	-0.583825	-0.343723
13337048	AT1G07700	8.64094	8.40167	8.50909	8.12851	9.2188	9.29434	8.59985	8.30161	8.46775	8.41246	9.24451	9.1716	8.99468	8.7805	8.71675	8.73084	9.5909	9.55184	9.10176	8.78097	8.7317	8.63656	9.44805	9.31446	0.353732	0.378828	0.207656	0.602327	0.372104	0.2575	-0.041093	-0.10007	-0.041348	0.283944	0.025717	-0.122737	0.107083	0.000465	0.014948	-0.09428	-0.14285	-0.237382	0.148176	0.100535	0.056296	-0.378224	-0.168567	-0.114645
13337060	AT1G07705	8.28675	8.30265	7.8781	7.95584	7.99749	8.18052	8.24458	8.01442	8.15755	7.81825	8.11315	8.31455	8.29356	8.13078	8.11594	7.93572	8.10864	8.17014	8.07888	8.03459	8.092	7.94841	8.03721	8.39939	0.006805	-0.171867	0.237837	-0.020118	0.111154	-0.01038	-0.042178	-0.288227	0.279446	-0.137591	0.115659	0.134028	-0.214682	-0.096195	-0.023941	0.012688	-0.071427	0.22924	-0.172504	0.192032	-0.303387	0.150279	-0.187086	0.095212
13337077	AT1G07725	7.21211	6.84572	6.97438	7.49141	7.22261	6.87756	7.37254	7.16268	6.83626	7.41115	7.14433	7.0023	7.14206	7.3348	7.32565	7.50664	7.3215	7.17912	7.26873	7.26111	7.51519	7.60474	7.26738	7.05191	-0.070049	0.489074	0.351274	0.015227	0.098883	0.301562	0.160434	0.316957	-0.138125	-0.080262	-0.078289	0.124738	0.126677	-0.073691	0.189534	0.098107	-0.054117	-0.127212	-0.033757	-0.390648	0.327659	0.178369	0.024172	-0.25195
13337081	AT1G07747	4.37515	4.91717	4.53361	4.57769	4.88803	4.86078	4.50141	5.74605	4.62139	5.30416	4.98559	5.39495	5.04716	5.46941	4.72669	4.81599	4.52193	5.09585	4.89183	4.84412	4.33284	5.37502	5.67386	5.35315	0.672008	0.552235	0.193078	0.238299	-0.3661	0.235062	0.126264	0.828873	0.087779	0.726468	0.097559	0.534166	-0.155325	-0.625292	-0.393849	0.559031	1.15192	0.257307	-0.281589	-1.45416	-0.481628	-0.167437	1.05436	-0.276859
13337083	AT1G07790	6.95509	6.96341	7.00261	7.09305	7.11199	6.96302	6.67724	6.47656	6.69895	6.79375	7.06614	6.59588	7.58212	7.53529	7.57135	7.6429	7.77093	8.04419	7.58716	7.50324	7.71952	7.78515	7.98591	8.01682	0.627025	0.57188	0.568741	0.549855	0.658944	1.08116	-0.277852	-0.48685	-0.303662	-0.2993	-0.045847	-0.367142	0.005039	-0.03205	0.148175	0.142248	0.214975	-0.027367	0.282891	0.4548	0.451837	0.441548	0.260822	0.339775
13337087	AT1G07795	4.77545	4.3874	4.12103	4.72143	4.43567	4.90348	4.38396	5.4586	4.75822	4.65289	4.25868	4.27671	4.75822	4.54064	4.8667	5.00117	5.0487	5.31558	5.18591	4.75822	4.40836	4.95074	5.82932	4.94586	-0.01723	0.153239	0.745672	0.27974	0.613023	0.412096	-0.391492	1.0712	0.637188	-0.068537	-0.176995	-0.626774	0.427688	0.217579	-0.45834	-0.050429	0.780627	-0.369716	0.81918	-0.853621	-1.09553	0.018108	0.957622	0.257058
13337091	AT1G07810	7.54623	7.58577	7.28203	7.73759	7.57281	7.46844	7.41511	7.67102	7.38701	7.7465	7.21855	7.43027	7.75248	7.71948	7.45927	7.6474	7.40458	7.56449	7.6799	7.73507	7.43775	7.82349	7.4463	7.53873	0.206245	0.133709	0.177238	-0.090188	-0.168235	0.096048	-0.131117	0.085257	0.104981	0.008917	-0.354261	-0.038169	-0.072572	0.015599	-0.021517	0.176092	0.041725	-0.02576	0.058545	-0.069658	-0.126498	0.167175	0.395986	0.012409
13337101	AT1G07830	9.93306	10.0317	10.1183	9.84696	9.23114	9.51353	9.90196	10.0684	9.90334	9.9181	9.51466	9.54237	9.86651	9.88774	9.81017	9.53352	9.24459	9.56612	10.0801	10.1075	10.1042	9.66489	9.56907	9.73873	-0.066545	-0.143918	-0.308089	-0.313446	0.013446	0.052589	-0.031094	0.0367	-0.214915	0.071132	0.283523	0.028841	0.213548	0.219798	0.294069	0.131371	0.324481	0.172608	0.244642	0.183098	0.508984	0.060239	0.040958	0.143767
13337108	AT1G07840	8.46532	8.45157	8.77921	8.73848	8.51632	8.46352	8.51357	8.7336	8.78358	8.72252	8.42623	8.45613	8.65988	8.75039	8.64257	8.58509	8.45447	8.52122	8.54341	8.74545	8.66344	8.65139	8.50994	8.47228	0.194557	0.298821	-0.136636	-0.153382	-0.061852	0.057701	0.048248	0.282025	0.004372	-0.015959	-0.090092	-0.007385	-0.116473	-0.004942	0.020871	0.0663	0.055473	-0.048934	-0.164721	-0.286967	0.016499	0.082259	0.145565	-0.041549
13337122	AT1G07850	4.23923	4.45752	4.20875	4.48933	4.26613	4.48563	4.8509	4.6597	4.37036	4.32104	4.17243	3.82535	4.74078	4.64782	4.77206	4.59418	4.85508	4.47492	4.65002	4.82811	4.81442	4.40033	4.61318	4.84506	0.501552	0.190298	0.563308	0.104853	0.588953	-0.010702	0.611675	0.202176	0.161613	-0.168295	-0.093699	-0.660279	-0.090756	0.180292	0.042366	-0.193852	-0.241898	0.370134	-0.702431	-0.021884	-0.119247	-0.025557	-0.148199	1.03041
13337127	AT1G07890	10.2285	10.35	10.5299	9.87279	10.2933	10.5477	10.313	10.3703	10.7028	10.002	10.4713	10.7353	10.3749	10.4178	10.6391	10.2573	10.5404	10.6324	10.3629	10.6012	10.7769	10.3294	10.657	10.7303	0.14648	0.06782	0.10924	0.384514	0.24713	0.08472	0.08452	0.02033	0.17295	0.129204	0.17808	0.18764	-0.01199	0.18342	0.13781	0.07213	0.11658	0.0979	-0.09651	0.16309	-0.03514	-0.057074	-0.0615	-0.08974
13337142	AT1G07900	5.9611	6.23225	6.29423	5.69352	6.27369	7.20322	4.21654	5.4589	5.85541	6.06902	6.80298	8.53241	5.5595	5.71901	5.79396	7.14554	6.59105	7.58846	5.40402	5.44084	5.17752	6.86055	7.2981	8.09578	-0.401594	-0.513241	-0.500272	1.45202	0.317361	0.385248	-1.74456	-0.773357	-0.438824	0.375506	0.529292	1.32919	-0.155479	-0.278175	-0.616435	-0.284992	0.707045	0.507314	1.58908	0.495182	-0.177611	-0.660498	0.177753	-0.821881
13337145	AT1G07910	8.34849	8.55223	8.37262	8.17819	8.44354	8.3083	8.23271	8.49489	8.18267	8.13482	8.33263	8.18469	8.47409	8.66238	8.49391	8.49109	8.37172	8.5671	8.25171	8.46822	8.53222	8.32887	8.27876	8.4786	0.125595	0.110145	0.121292	0.312897	-0.071813	0.258808	-0.115783	-0.057348	-0.189943	-0.043369	-0.110909	-0.123605	-0.222379	-0.194163	0.038307	-0.162219	-0.092969	-0.0885	-0.106596	-0.136815	0.22825	-0.11885	0.01794	0.035105
13337173	AT1G07920	9.81785	9.81748	9.79786	9.80862	9.66616	10.0079	9.79892	9.75945	9.96019	9.78599	9.8688	9.91789	9.95625	9.86393	9.9028	9.78291	9.86758	10.188	9.9734	9.97858	9.98609	9.96787	9.96744	10.302	0.138407	0.046459	0.10494	-0.025708	0.201419	0.18009	-0.018929	-0.058025	0.162326	-0.022631	0.202639	-0.089991	0.017152	0.114647	0.083289	0.184959	0.099861	0.11407	0.036081	0.172672	-0.079037	0.20759	-0.102778	0.204061
13337178	AT1G07930	10.1677	10.2096	10.2382	10.2653	9.94175	10.2541	10.1419	10.1665	10.2299	10.1631	10.0913	10.2337	10.1226	9.96521	9.91241	9.88891	9.7061	10.1914	10.1562	10.1053	10.1792	10.0245	9.90979	10.2632	-0.04504	-0.244423	-0.325827	-0.376376	-0.235643	-0.06263	-0.02574	-0.04314	-0.00837	-0.10216	0.149534	-0.02042	0.03361	0.140133	0.266747	0.135576	0.203688	0.07171	0.05935	0.183273	0.275117	0.237736	0.054154	0.09213
13337184	AT1G07960	7.94905	8.19198	8.4227	8.03558	7.88875	7.89624	8.10394	7.9837	8.31195	7.9029	8.15971	8.13157	7.77254	8.15503	8.21626	7.73426	7.9162	7.99845	8.11435	8.42088	8.19937	7.85301	8.01402	8.19691	-0.176507	-0.036943	-0.206447	-0.30132	0.027454	0.102207	0.15489	-0.208272	-0.11075	-0.13268	0.270966	0.23533	0.341814	0.265849	-0.016881	0.118749	0.097819	0.198464	0.186924	0.474121	0.093869	0.251429	-0.173147	-0.036866
13337192	AT1G07985	3.12684	2.67848	2.66094	2.59094	2.99262	3.17671	3.26864	2.80807	3.28536	2.85734	3.12163	3.88708	3.49401	3.2849	2.92179	2.82988	3.25043	3.10373	3.65698	3.20377	3.0516	3.21989	3.35871	3.6408	0.367164	0.606421	0.260852	0.238935	0.257805	-0.072981	0.141793	0.129588	0.624418	0.2664	0.12901	0.710367	0.162973	-0.081139	0.12981	0.390009	0.108279	0.537074	0.02118	-0.210727	-0.494608	0.123609	-0.020731	-0.173293
13337196	AT1G07990	10.3264	10.3514	10.2328	10.2571	10.4744	10.4005	10.3008	10.3393	10.1952	10.3663	10.5765	10.4568	10.4406	10.4538	10.4469	10.4095	10.5399	10.5534	10.4564	10.4315	10.3806	10.4005	10.488	10.6063	0.11415	0.10242	0.21406	0.1524	0.06548	0.15294	-0.02558	-0.01212	-0.03764	0.10923	0.10201	0.05634	0.01587	-0.02231	-0.06634	-0.00898	-0.05194	0.05282	0.04145	-0.01019	-0.0287	-0.11821	-0.15395	-0.00352
13337213	AT1G08005	4.36123	4.563	4.069	4.66236	4.40228	4.60003	4.52141	4.36498	4.38239	4.40957	4.20282	3.85565	4.75024	4.38401	5.47063	5.26242	4.21868	4.50794	4.87956	4.64609	4.46072	4.5402	5.1231	4.50288	0.38901	-0.17899	1.40162	0.600055	-0.183602	-0.092089	0.160182	-0.198024	0.31339	-0.252787	-0.199464	-0.744379	0.129319	0.262086	-1.0099	-0.722212	0.904425	-0.005062	-0.030863	0.46011	-1.32329	-0.469425	1.10389	0.739317
13337215	AT1G08032	1.95294	1.88409	1.88716	2.05198	1.94029	1.87498	1.95294	1.95294	1.9465	1.87207	2.18717	1.87593	1.93575	2.15772	1.95294	2.06413	1.98681	2.03067	1.95294	2.17242	2.34429	1.84085	1.99513	1.8223	-0.017189	0.273625	0.065771	0.012158	0.04652	0.155684	0	0.068842	0.059337	-0.179905	0.246882	0.000941	0.017189	0.014698	0.391353	-0.223289	0.008325	-0.208365	0.017189	-0.054144	0.332016	-0.043384	-0.238557	-0.209306
13337217	AT1G08035	3.05442	3.11617	2.78949	2.90133	3.10937	2.93569	3.2992	3.18064	3.3083	3.00143	3.11617	2.761	3.37581	3.07841	3.33005	3.19053	3.17947	2.90319	3.11617	3.40219	3.50084	3.138	3.00062	3.16759	0.321395	-0.037762	0.540563	0.289198	0.070102	-0.032506	0.244782	0.064467	0.518805	0.1001	0.006806	-0.17469	-0.259643	0.323785	0.170792	-0.052538	-0.178843	0.264397	-0.504425	0.259318	-0.348013	-0.152638	-0.185649	0.439087
13337220	AT1G08090	4.08979	4.0165	3.90717	4.24417	3.66976	3.51326	3.70882	3.97385	3.64907	4.03134	3.76763	3.74418	4.69648	3.9921	4.21786	4.2982	3.69396	3.99001	3.97871	4.05114	4.19349	4.64617	3.90853	3.88413	0.606692	-0.024397	0.310691	0.054028	0.024206	0.476744	-0.380964	-0.042652	-0.258102	-0.212828	0.097869	0.230916	-0.71777	0.059039	-0.024377	0.347976	0.214567	-0.105881	-0.336806	0.101691	0.233725	0.560804	0.116698	-0.336797
13337226	AT1G08110	10.7122	10.8837	10.9553	10.9062	10.9287	10.783	10.6813	10.871	10.8818	11.009	10.7759	10.6407	10.551	10.6669	10.907	10.7902	10.8425	10.7438	10.5659	10.7743	10.5663	10.9569	10.7872	10.645	-0.16116	-0.21688	-0.04823	-0.11604	-0.08625	-0.03919	-0.0309	-0.01275	-0.07352	0.1027	-0.15284	-0.14227	0.01489	0.10745	-0.34069	0.16668	-0.05526	-0.09874	0.04579	0.1202	-0.26717	0.06398	0.09758	0.04353
13337238	AT1G08120	3.01268	3.22147	2.27585	2.90662	2.65962	3.58416	3.29149	2.7367	2.93889	3.24193	3.05125	2.64307	3.61292	3.28316	2.9585	2.85873	2.82594	2.90861	3.16434	3.01268	2.97021	3.01268	2.82442	2.99034	0.600241	0.061691	0.682655	-0.047895	0.166326	-0.675547	0.278807	-0.484764	0.663043	0.335311	0.391631	-0.941087	-0.448583	-0.27048	0.011704	0.153953	-0.001524	0.081725	-0.72739	0.214284	-0.651339	-0.181358	-0.393155	1.02281
13337242	AT1G08190	8.53061	8.75535	8.75171	8.63495	8.90103	9.0997	8.52887	8.64689	8.67536	8.7838	8.88669	9.04738	8.64416	8.78241	8.87096	8.82272	9.0783	9.05089	8.53468	8.6813	8.88306	8.74552	9.03321	8.89611	0.113553	0.027057	0.119255	0.187772	0.177278	-0.048812	-0.001736	-0.108464	-0.076347	0.148849	-0.014339	-0.052329	-0.109478	-0.101112	0.012095	-0.077204	-0.045096	-0.154777	-0.107742	0.007352	0.088442	-0.226053	-0.030757	-0.102448
13337264	AT1G08240	4.84855	5.05528	5.47452	4.97004	5.56755	5.56439	4.82193	4.97847	4.60231	4.83544	5.04172	5.49077	5.36231	5.40007	4.4988	4.57879	5.48181	4.45674	5.08187	4.90606	4.1479	4.74351	5.29573	4.81504	0.513761	0.344781	-0.975726	-0.391251	-0.08574	-1.10766	-0.026617	-0.076818	-0.872213	-0.134602	-0.525836	-0.073628	-0.280439	-0.49401	-0.350894	0.164718	-0.186077	0.358301	-0.253822	-0.417192	0.521319	0.29932	0.339759	0.431929
13337266	AT1G08260	6.70486	6.585	6.90196	7.07164	6.90481	7.08045	6.77171	6.33472	6.73633	6.78546	7.10816	7.28043	6.87154	7.02704	7.02617	7.37062	7.43377	7.3926	6.78445	6.62836	7.30666	7.11456	7.32616	7.44967	0.16668	0.44204	0.124214	0.298988	0.528956	0.312159	0.066851	-0.250278	-0.165627	-0.286177	0.20335	0.199983	-0.087085	-0.398681	0.280489	-0.256063	-0.107608	0.057061	-0.153936	-0.148403	0.446116	0.030114	-0.310958	-0.142922
13337295	AT1G08280	8.31405	8.57728	8.65473	8.67017	8.52048	8.44407	8.2394	8.32642	8.6165	8.66382	8.35937	8.23982	8.44407	8.4526	8.47603	8.66762	8.38307	8.28236	8.17059	8.13825	8.37322	8.30864	8.0392	8.07645	0.13002	-0.124685	-0.178705	-0.002558	-0.137408	-0.161714	-0.074656	-0.250857	-0.038234	-0.006353	-0.161104	-0.204256	-0.273488	-0.314344	-0.102802	-0.358975	-0.34387	-0.205912	-0.198832	-0.063487	-0.064568	-0.352622	-0.182766	-0.001656
13337298	AT1G08300	7.9597	7.51442	7.8675	6.85905	7.10004	6.9746	8.05359	8.23693	7.96458	6.93431	7.02836	6.59416	7.69435	7.91944	7.86652	6.42159	6.96216	7.03327	7.86433	7.83372	7.58723	6.51617	6.74256	6.86504	-0.265357	0.405024	-0.000979	-0.437464	-0.137886	0.05867	0.093886	0.72251	0.097081	0.075262	-0.071678	-0.380434	0.16998	-0.085724	-0.279291	0.094585	-0.219597	-0.168228	0.076094	-0.808234	-0.376372	0.019323	-0.147919	0.212206
13337305	AT1G08310	4.75154	5.17458	4.94447	4.9895	4.5928	4.24042	4.55715	4.80555	5.48693	5.07462	4.63225	4.91635	5.30229	5.18245	5.39308	6.11602	5.66554	5.63113	5.23193	5.52166	5.94479	5.54729	5.5825	5.5177	0.550753	0.007864	0.448614	1.12652	1.07273	1.39071	-0.194392	-0.369032	0.542461	0.085121	0.039448	0.67593	-0.070366	0.339217	0.551706	-0.568732	-0.083038	-0.113436	0.124026	0.708249	0.009245	-0.653853	-0.122486	-0.789366
13337313	AT1G08340	5.78231	6.1256	5.80281	6.08402	5.96689	5.71335	5.80281	5.80281	5.4292	5.89051	5.50911	5.2803	5.90592	5.82517	5.85087	5.72078	5.91283	5.88366	5.89848	6.01226	5.66048	5.58273	5.96979	5.83528	0.123609	-0.300435	0.04806	-0.363239	-0.054055	0.170316	0.020499	-0.322792	-0.373613	-0.193505	-0.457781	-0.433047	-0.007434	0.187095	-0.190386	-0.138049	0.056954	-0.048387	-0.027933	0.509887	0.183227	0.055456	0.514735	0.38466
13337320	AT1G08360	9.26454	9.13684	9.18694	8.97638	9.16559	9.37372	9.0875	8.96594	9.2896	9.39479	9.13134	9.11825	9.07727	9.05986	8.98432	8.97029	8.94411	9.45173	9.12847	9.16359	8.97152	9.24161	9.02848	9.29694	-0.187268	-0.076987	-0.202612	-0.006096	-0.221485	0.078008	-0.177036	-0.170899	0.102664	0.418412	-0.034255	-0.255472	0.051199	0.10373	-0.012804	0.271329	0.084368	-0.15479	0.228235	0.274629	-0.115468	-0.147083	0.118623	0.100682
13337327	AT1G08370	9.87085	9.96542	9.7824	9.58659	9.97847	9.77914	9.8812	9.95291	9.95125	9.65264	9.86978	9.85831	10.1466	10.2206	10.1747	9.69758	10.1511	9.95291	10.0817	10.1758	10.1202	9.71814	10.0221	10.0013	0.275733	0.255214	0.392346	0.11099	0.172612	0.173771	0.01035	-0.012507	0.168849	0.066044	-0.108688	0.07917	-0.06489	-0.04481	-0.05454	0.020558	-0.12902	0.048401	-0.07524	-0.032303	-0.223389	-0.045486	-0.020332	-0.030769
13337337	AT1G08390	8.40608	8.1979	7.77244	7.3038	8.67257	8.56977	8.25653	7.88575	7.59667	6.97658	8.50353	8.07084	8.597	8.37888	7.95959	7.42622	8.77181	8.79429	8.49162	8.09606	8.02548	7.16297	8.72181	8.49897	0.19092	0.18098	0.18715	0.122426	0.099245	0.224518	-0.149553	-0.312143	-0.175769	-0.327222	-0.169038	-0.498928	-0.105377	-0.282818	0.065886	-0.263255	-0.050001	-0.295311	0.044176	0.029325	0.241655	0.063967	0.119037	0.203617
13337342	AT1G08410	7.65309	7.28146	7.38865	7.26738	7.04124	7.0511	7.59145	7.68464	7.64649	7.58012	7.13767	7.27132	7.84401	7.71007	7.62229	7.49536	7.39649	7.58946	7.62781	7.82685	7.76936	7.43502	7.4487	7.67632	0.190918	0.428608	0.233643	0.227987	0.355247	0.538356	-0.061641	0.40318	0.257841	0.312742	0.09642	0.220215	-0.216197	0.116782	0.147071	-0.060342	0.052204	0.086866	-0.154556	-0.286398	-0.11077	-0.373084	-0.044216	-0.133349
13337351	AT1G08420	7.92641	8.3131	8.19318	7.93529	8.57393	8.11368	8.59658	8.59566	8.19216	8.2377	8.28793	7.928	9.34192	8.81967	9.04116	9.12384	9.26666	8.83165	8.98782	8.65337	8.90359	8.83382	8.64213	9.08021	1.41551	0.506566	0.847974	1.18855	0.692739	0.71797	0.670175	0.282554	-0.001018	0.302412	-0.285998	-0.185689	-0.354107	-0.166302	-0.137562	-0.290027	-0.624538	0.248554	-1.02428	-0.448856	-0.136544	-0.592439	-0.33854	0.434243
13337375	AT1G08430	3.34599	4.11244	4.15428	3.99061	4.4091	3.94093	2.55881	4.13379	2.79736	3.20151	3.4989	3.49317	3.21052	3.05962	2.94188	3.33386	3.16206	3.43926	3.38502	2.867	2.5134	3.54531	3.15455	3.27174	-0.13547	-1.05282	-1.2124	-0.656748	-1.24704	-0.501663	-0.787182	0.021351	-1.35692	-0.7891	-0.910201	-0.447755	0.174495	-0.192618	-0.428483	0.211446	-0.00751	-0.167522	0.961677	-0.213969	0.928435	1.00055	0.902691	0.280233
13337383	AT1G08440	4.73463	3.22534	2.95809	2.97609	2.9593	3.02328	3.08679	4.09075	2.80054	2.81726	3.3897	3.26396	2.76022	3.06381	3.10287	2.57064	3.21747	4.26364	2.50458	2.9258	3.03481	2.60467	3.47301	2.86514	-1.97442	-0.161534	0.14478	-0.40545	0.258178	1.24036	-1.64784	0.86541	-0.157552	-0.158823	0.430401	0.240675	-0.255638	-0.138009	-0.068058	0.034028	0.255535	-1.3985	1.3922	-1.00342	0.089494	0.192851	-0.174866	-1.63918
13337390	AT1G08460	8.23566	8.43502	8.5433	8.28958	8.32675	8.20755	8.46665	8.4886	8.49161	8.34893	8.37934	8.43575	8.0556	8.1349	8.2065	8.36515	8.18196	7.68184	7.91641	8.08031	8.38313	8.34952	8.02014	7.8395	-0.180058	-0.300122	-0.336804	0.075568	-0.14479	-0.525705	0.230991	0.053586	-0.051693	0.059349	0.052583	0.228203	-0.139187	-0.054588	0.176636	-0.015621	-0.161824	0.157652	-0.370178	-0.108174	0.228329	-0.07497	-0.214407	-0.070551
13337396	AT1G08465	8.15125	7.80033	7.67975	7.92816	7.85235	7.91789	7.90751	7.5514	7.60479	7.47221	7.74278	7.53801	8.1499	8.08152	7.93287	8.1915	8.2938	8.10375	8.17642	8.03793	7.92269	8.14768	7.8856	7.95149	-0.001347	0.281196	0.253115	0.26334	0.441448	0.185853	-0.243736	-0.248928	-0.074961	-0.45595	-0.109569	-0.37989	0.026514	-0.043592	-0.010176	-0.043822	-0.408199	-0.152259	0.27025	0.205336	0.064785	0.412128	-0.29863	0.227631
13337405	AT1G08480	10.4388	10.5058	10.435	10.4985	10.454	10.5788	10.3429	10.4492	10.5409	10.447	10.5099	10.6485	10.5001	10.4961	10.3867	10.4736	10.534	10.7046	10.5001	10.6618	10.6101	10.5946	10.6609	10.876	0.06135	-0.00968	-0.04829	-0.02486	0.08001	0.1258	-0.09582	-0.05653	0.10588	-0.05145	0.05597	0.06974	5e-05	0.16573	0.22338	0.12097	0.12694	0.17139	0.09587	0.22226	0.1175	0.17242	0.07097	0.10165
13337411	AT1G08500	4.88682	4.73905	5.64903	4.59171	3.78751	4.3539	4.85816	4.83776	5.71154	4.66348	4.05858	3.9853	4.88682	5.80959	6.1081	5.32314	4.91994	4.5358	4.88682	5.76764	6.07759	5.11648	4.62745	4.67271	0	1.07054	0.459067	0.731424	1.13243	0.1819	-0.028666	0.098706	0.062512	0.071762	0.27107	-0.368591	0	-0.04195	-0.030506	-0.206656	-0.292491	0.136913	0.028666	-0.140656	-0.093018	-0.278418	-0.563561	0.505504
13337416	AT1G08520	11.3816	11.4685	11.4018	11.4695	11.4136	11.5765	11.3806	11.3767	11.399	11.4678	11.4383	11.2659	11.4811	11.3235	11.309	11.3119	11.3344	11.3472	11.2982	11.2656	11.2241	11.2124	11.287	11.1742	0.09949	-0.14502	-0.09281	-0.15753	-0.07921	-0.22931	-0.00102	-0.09187	-0.00277	-0.00169	0.02466	-0.31061	-0.18293	-0.05795	-0.0849	-0.09954	-0.04742	-0.17295	-0.18191	0.03392	-0.08213	-0.09785	-0.07208	0.13766
13337434	AT1G08530	8.57454	8.55416	8.49469	8.24767	8.58869	8.64108	8.43647	8.56243	8.58109	8.3464	8.56518	8.67529	8.64333	8.76071	8.53307	8.1743	8.48411	8.57796	8.52712	8.89158	8.69152	8.16517	8.59578	8.45631	0.068795	0.206542	0.038375	-0.073368	-0.104579	-0.063122	-0.138065	0.008264	0.0864	0.098732	-0.023513	0.034208	-0.116219	0.130871	0.15845	-0.009127	0.111668	-0.121647	0.021846	0.122607	0.07205	-0.107859	0.135181	-0.155855
13337442	AT1G08540	10.6017	10.7545	10.6845	10.5609	10.786	10.8085	10.6106	10.7167	10.7027	10.6459	10.6236	10.3598	10.7766	10.7237	10.7653	10.6104	10.7729	10.8848	10.6555	10.7288	10.6843	10.6791	10.678	10.6881	0.17488	-0.03075	0.08082	0.0495	-0.01309	0.07636	0.0089	-0.03772	0.0183	0.08505	-0.16241	-0.44862	-0.12114	0.0051	-0.08097	0.0687	-0.09498	-0.1967	-0.13004	0.04282	-0.09927	-0.01635	0.06743	0.25192
13337452	AT1G08550	9.13797	9.32671	9.28366	9.38485	9.08002	8.92268	9.32658	9.22352	9.07151	9.23121	8.67992	8.60453	8.91439	9.09126	9.06909	9.12797	8.44413	8.70619	8.84623	8.89702	9.09498	9.12743	8.34043	8.35484	-0.223586	-0.235455	-0.214569	-0.25688	-0.635887	-0.216483	0.188601	-0.103188	-0.212152	-0.153632	-0.400099	-0.318149	-0.068156	-0.19423	0.025883	-0.000538	-0.103699	-0.351348	-0.256757	-0.091042	0.238035	0.153094	0.2964	-0.033199
13337461	AT1G08570	9.33596	9.3353	9.52232	9.45486	9.26309	9.38946	9.49654	9.2339	9.50043	9.48806	9.0915	9.22423	8.71193	9.25595	9.37171	9.22003	8.93008	9.04613	9.04398	9.10487	9.10509	9.29454	8.79279	8.83136	-0.624033	-0.079351	-0.150608	-0.234823	-0.333009	-0.343333	0.160578	-0.101405	-0.021891	0.033205	-0.171593	-0.165232	0.332048	-0.151086	-0.26662	0.074506	-0.137287	-0.214765	0.17147	-0.049681	-0.244729	0.041301	0.034306	-0.049533
13337474	AT1G08590	6.17883	5.97991	5.82562	6.04458	5.90669	5.84049	6.19912	5.94235	5.9682	6.04047	5.90911	5.33635	5.97152	6.16123	6.02361	6.08752	5.83347	5.67766	5.71637	6.08373	6.4233	5.88513	6.08909	5.59974	-0.207311	0.181323	0.197988	0.042937	-0.073215	-0.162823	0.020291	-0.037559	0.14258	-0.004111	0.002425	-0.504138	-0.255148	-0.077505	0.399691	-0.202384	0.255618	-0.077927	-0.275439	-0.039946	0.257111	-0.198273	0.253193	0.426211
13337478	AT1G08600	9.54738	9.77097	9.73053	9.51453	9.79399	9.74345	9.68681	9.79818	9.85797	9.56584	9.8286	9.83326	9.70313	9.81727	9.85431	9.6344	9.85322	9.8978	9.6727	9.87713	9.84907	9.47855	9.79145	9.90108	0.155757	0.046303	0.123788	0.119876	0.05923	0.154346	0.139432	0.027211	0.127441	0.051309	0.034613	0.089814	-0.030438	0.059858	-0.005238	-0.155853	-0.061769	0.003283	-0.16987	0.032647	-0.132679	-0.207162	-0.096382	-0.086531
13337507	AT1G08620	8.42837	8.6502	8.74024	8.69049	8.62152	8.39225	8.56174	8.68478	8.57911	8.62398	8.61289	8.77307	8.81282	8.90492	9.02266	8.83812	8.87629	8.76474	8.81473	8.7952	8.78679	8.67971	8.81846	8.7604	0.384451	0.254716	0.282413	0.147635	0.254764	0.372482	0.133373	0.034573	-0.161127	-0.066508	-0.008629	0.380812	0.001907	-0.109713	-0.235865	-0.158419	-0.057825	-0.00434	-0.131466	-0.144286	-0.074738	-0.091911	-0.049196	-0.385152
13337524	AT1G08650	8.40032	8.21841	7.83397	7.22718	8.02281	8.21765	8.22028	8.12381	8.51991	7.15573	8.25689	8.818	7.44626	7.99866	7.64604	6.87755	7.58882	8.34521	7.91962	8.38953	7.7447	6.87539	7.99288	8.25295	-0.954053	-0.219748	-0.187933	-0.34963	-0.433986	0.127564	-0.180033	-0.094601	0.685939	-0.071444	0.234076	0.600357	0.473357	0.390862	0.098662	-0.002163	0.404057	-0.092263	0.65339	0.485463	-0.587277	0.069281	0.169981	-0.69262
13337531	AT1G08680	9.72565	9.78789	9.83732	9.76588	9.8328	9.57705	9.81191	9.88791	9.77537	9.81158	9.82974	9.65507	9.75356	9.82744	9.81085	9.78757	9.88325	9.69276	9.72913	9.84529	9.85693	9.72983	9.77537	9.68289	0.027912	0.039553	-0.026477	0.021681	0.05045	0.115714	0.086265	0.10002	-0.061951	0.0457	-0.003065	0.078022	-0.024431	0.017847	0.046081	-0.057732	-0.10788	-0.009869	-0.110696	-0.082173	0.108032	-0.103432	-0.104815	-0.087891
13337549	AT1G08710	8.8523	8.95664	9.00637	8.91977	8.84918	8.77926	8.88386	8.9976	8.84924	8.74242	8.76613	8.55288	8.7566	8.90345	8.99693	8.98312	8.85204	8.70247	8.97676	8.90199	8.86794	8.76298	8.80416	8.76723	-0.0957	-0.053186	-0.009437	0.063358	0.002857	-0.07679	0.031556	0.040961	-0.157126	-0.177346	-0.083053	-0.226378	0.220159	-0.001467	-0.128988	-0.220144	-0.047879	0.064757	0.188603	-0.042428	0.028138	-0.042798	0.035174	0.291135
13337559	AT1G08720	8.82209	8.70355	8.78813	8.57316	8.72437	8.36915	8.8956	8.97701	8.57481	8.53573	8.73154	8.64621	8.78858	8.87687	8.8943	8.67493	8.76244	8.56986	8.91891	8.79901	9.02918	8.56894	8.77928	8.69245	-0.033505	0.173326	0.106168	0.101767	0.038072	0.200713	0.073506	0.27347	-0.213325	-0.037432	0.007173	0.277067	0.130329	-0.077865	0.134879	-0.105991	0.016834	0.122591	0.056823	-0.351335	0.348204	-0.068559	0.009661	-0.154476
13337574	AT1G08730	4.235	4.23687	4.27347	4.72265	4.15273	4.8125	4.64861	4.50392	4.54143	5.00221	4.54373	4.33298	4.66202	4.56674	4.81403	5.55442	4.61373	4.82869	5.04471	4.81419	4.91433	5.06758	4.9519	4.75949	0.427021	0.329872	0.540555	0.831776	0.461	0.016192	0.413611	0.267056	0.267954	0.279567	0.390998	-0.479511	0.382691	0.247452	0.100302	-0.486843	0.338167	-0.069195	-0.03092	-0.019604	-0.167652	-0.76641	-0.052831	0.410316
13337601	AT1G08750	8.86973	8.93361	8.74229	9.00534	8.77737	8.83835	8.64988	8.85844	8.81726	8.98099	8.92136	8.85543	8.93157	8.6793	8.80571	8.94893	8.67641	8.82325	8.68262	8.58798	8.82378	8.92666	8.83142	8.83635	0.061841	-0.254316	0.063418	-0.056409	-0.100961	-0.015097	-0.219851	-0.075175	0.074967	-0.024347	0.143983	0.017076	-0.248955	-0.091317	0.018068	-0.022274	0.155005	0.013099	-0.029104	-0.016142	-0.056899	0.002073	0.011022	-0.003977
13337615	AT1G08760	8.07372	7.98284	8.00173	7.83634	8.17353	8.02992	8.15171	8.07938	8.05141	8.094	8.12297	8.02214	8.45007	8.42245	8.30363	8.26779	8.46784	8.20942	8.25652	8.50846	8.51119	8.26464	8.24535	8.35191	0.376354	0.439614	0.301895	0.431446	0.294315	0.179509	0.077993	0.096536	0.049677	0.257658	-0.050561	-0.007779	-0.193552	0.086003	0.207565	-0.003149	-0.222491	0.142487	-0.271545	-0.010533	0.157888	-0.260807	-0.17193	0.150266
13337622	AT1G08770	6.00045	5.55404	5.62505	5.66993	5.66993	5.64068	5.6345	5.54749	5.5368	5.51586	5.72794	5.47686	5.75164	5.49358	5.64309	5.58355	5.73081	5.66855	5.53	5.92313	5.76923	5.75922	5.6145	5.60091	-0.248813	-0.060458	0.018045	-0.086379	0.060884	0.027866	-0.365945	-0.006545	-0.08825	-0.154071	0.058011	-0.163822	-0.221637	0.429551	0.126136	0.175669	-0.116313	-0.06764	0.144308	0.436096	0.214386	0.32974	-0.174324	0.096182
13337626	AT1G08790	4.65858	5.29147	4.96997	4.34206	4.86826	5.10374	4.4155	4.8697	4.8317	4.81159	4.62822	5.29069	4.8317	4.86261	5.03626	4.5733	4.92114	5.56133	5.1845	4.84364	4.8317	4.91434	4.9945	4.8317	0.173118	-0.428857	0.066294	0.231242	0.052883	0.457595	-0.243081	-0.421773	-0.13827	0.469536	-0.240034	0.186953	0.352805	-0.018971	-0.204564	0.341039	0.073358	-0.729633	0.595886	0.402802	-0.066294	-0.128497	0.313392	-0.916586
13337629	AT1G08830	11.019	10.8571	10.9008	10.9794	10.9394	10.9549	10.9873	10.9824	11.0852	11.0712	11.1372	11.29	10.9631	10.8785	10.9784	10.9456	10.872	11.1164	11.1934	11.1597	11.1046	11.0987	11.0711	11.2985	-0.05589	0.02134	0.07765	-0.03386	-0.06735	0.16151	-0.03166	0.12531	0.18443	0.09177	0.19777	0.33505	0.23027	0.28123	0.12622	0.15309	0.19908	0.18208	0.26193	0.15592	-0.05821	0.06132	0.00131	-0.15297
13337639	AT1G08845	8.05759	8.35891	7.77616	8.02843	7.90059	7.83137	8.2211	8.28871	8.04118	7.57512	7.87989	7.74536	8.31086	8.3643	8.04313	8.04131	7.75476	8.0204	8.38396	8.25061	8.15315	7.53563	7.94919	7.83688	0.253273	0.005394	0.266976	0.012884	-0.145829	0.189026	0.163504	-0.070195	0.265026	-0.453311	-0.0207	-0.086014	0.073098	-0.113692	0.110019	-0.50568	0.194428	-0.183524	-0.090406	-0.043497	-0.155007	-0.052369	0.215128	-0.09751
13337645	AT1G08860	3.96238	4.10083	3.82822	3.80777	3.80785	3.74959	3.26393	3.92739	3.20145	3.8216	3.31532	4.42949	5.92144	3.88179	4.0743	4.27453	3.11443	4.26471	6.57491	4.3806	3.64898	4.16021	4.18927	4.68307	1.95907	-0.219039	0.246076	0.46676	-0.693411	0.515113	-0.698441	-0.173439	-0.62677	0.013827	-0.492523	0.679896	0.653464	0.498808	-0.425319	-0.114323	1.07484	0.418365	1.3519	0.672247	0.201451	-0.12815	1.56736	-0.261531
13337662	AT1G08890	8.52789	9.49764	9.0016	8.43085	7.89567	8.42181	8.91112	8.99384	9.00555	8.37002	7.55058	8.3305	8.45244	9.02816	9.10206	8.3275	8.3375	8.38394	8.51709	8.922	8.36487	8.24653	8.14887	7.97521	-0.075453	-0.469473	0.10046	-0.103357	0.441835	-0.037868	0.383229	-0.503796	0.003948	-0.060831	-0.345087	-0.091311	0.064648	-0.106163	-0.737194	-0.080969	-0.188635	-0.40873	-0.318581	0.397633	-0.741142	-0.020138	0.156452	-0.317419
13337678	AT1G08900	9.61027	9.53069	9.29203	9.19791	9.51846	9.23494	9.76138	9.37696	9.46506	9.30241	9.41829	9.16498	9.76705	9.5496	9.4723	9.34269	9.7911	9.43384	10.0048	9.7509	9.39894	9.40376	9.56814	9.27442	0.156777	0.018911	0.180271	0.144787	0.272638	0.1989	0.151107	-0.153728	0.173029	0.104508	-0.100175	-0.069965	0.23775	0.201303	-0.073366	0.061067	-0.222962	-0.159416	0.086643	0.355031	-0.246395	-0.043441	-0.122787	-0.089451
13337695	AT1G08910	10.1952	10.2501	10.3242	10.3693	10.3585	10.2958	10.1744	10.2265	10.3461	10.2229	10.3356	10.141	10.4264	10.3521	10.3659	10.4104	10.3981	10.2509	10.2769	10.2248	10.0833	10.1806	10.2863	10.1351	0.23121	0.10205	0.04163	0.04114	0.03965	-0.04494	-0.02079	-0.02353	0.02187	-0.14635	-0.02292	-0.15479	-0.14948	-0.12731	-0.28259	-0.22983	-0.11182	-0.11577	-0.12869	-0.10378	-0.30446	-0.08348	-0.0889	0.03902
13337711	AT1G08920	8.53336	8.7124	8.38684	8.58497	8.36146	8.35258	8.55197	8.66299	8.41276	8.79873	8.78757	9.10492	8.58015	8.64471	8.49424	8.4421	8.33417	8.34306	8.42169	8.60975	8.63057	8.88631	8.43981	9.12892	0.046793	-0.067691	0.107399	-0.142871	-0.027293	-0.009521	0.018608	-0.049409	0.02592	0.213763	0.426108	0.752336	-0.158458	-0.034965	0.136333	0.444218	0.105643	0.78586	-0.177066	0.014444	0.110413	0.230455	-0.320465	0.033524
13337731	AT1G08930	11.5455	11.1661	11.0995	11.1779	10.4426	9.44098	11.5586	11.2755	11.3198	11.3924	10.2903	9.89679	11.7374	11.3741	11.5015	11.4918	10.9631	10.7885	11.8761	11.6584	11.4374	11.7125	10.9004	10.9167	0.19186	0.20804	0.40192	0.3139	0.52054	1.34749	0.01304	0.10942	0.22026	0.21453	-0.15222	0.455814	0.13871	0.28428	-0.06403	0.22075	-0.06265	0.12827	0.12567	0.17486	-0.28429	0.00622	0.08957	-0.327544
13337751	AT1G08940	8.00702	7.22236	7.55372	7.71517	6.93738	7.06304	8.20622	7.83936	7.27777	7.86332	7.16193	7.5003	7.44405	7.18601	6.92984	7.29662	7.22419	6.83956	8.03053	7.93037	7.55372	7.58086	7.21257	7.73634	-0.56297	-0.036356	-0.623884	-0.418543	0.286818	-0.223475	0.199199	0.616996	-0.275953	0.148154	0.224555	0.437261	0.586471	0.744361	0.623884	0.284236	-0.011624	0.896779	0.387272	0.127365	0.899837	0.136082	-0.236179	0.459518
13337755	AT1G68760	6.14635	6.21401	6.39082	5.98494	7.02094	6.56076	6.30011	6.26551	6.36486	6.17033	6.43137	6.22527	6.28343	6.72225	6.78782	6.12416	6.49348	6.55621	5.62868	6.31055	5.88673	5.59605	6.65562	6.34401	0.13708	0.508242	0.396998	0.139226	-0.52746	-0.004546	0.153754	0.0515	-0.025969	0.185397	-0.589571	-0.335491	-0.654749	-0.4117	-0.901094	-0.528114	0.162136	-0.212204	-0.808503	-0.4632	-0.875125	-0.713511	0.751707	0.123287
13337757	AT1G08960	7.98246	8.26214	7.92669	8.16152	8.06757	8.1453	7.7575	8.03677	8.25032	7.93103	7.97509	7.78595	8.07406	8.21624	8.09961	8.10759	7.97449	8.24395	8.01544	8.07891	8.33486	7.87752	8.06428	8.2106	0.091604	-0.045903	0.172916	-0.05393	-0.093079	0.098642	-0.224958	-0.225375	0.323631	-0.230487	-0.092484	-0.35935	-0.058618	-0.137329	0.235255	-0.230064	0.089793	-0.033342	0.16634	0.088046	-0.088376	0.000423	0.182277	0.326008
13337762	AT1G08970	6.2238	6.05986	5.891	5.84738	5.91871	6.09891	6.02835	5.96998	6.24847	5.81477	6.04081	5.77102	6.15052	6.07492	5.92893	6.10577	6.14927	6.14814	6.21861	6.23494	6.18063	6.18086	6.39952	6.27389	-0.07328	0.015055	0.037923	0.258393	0.230551	0.049221	-0.195445	-0.089885	0.357471	-0.032604	0.122094	-0.327891	0.068089	0.160025	0.251708	0.075092	0.25025	0.125756	0.263534	0.24991	-0.105763	0.107696	0.128156	0.453647
13337770	AT1G08980	9.95869	10.1874	10.0997	10.3267	9.21536	8.64845	10.2085	10.1637	9.87334	10.165	8.82978	8.32158	9.66176	10.0077	9.92225	9.97365	8.73097	8.56284	9.69531	9.94924	9.91592	9.97384	8.6281	8.23006	-0.296928	-0.1797	-0.177467	-0.353048	-0.484394	-0.085606	0.249802	-0.02368	-0.226381	-0.1617	-0.385581	-0.326868	0.033547	-0.058476	-0.006336	0.000189	-0.102873	-0.332776	-0.216255	-0.034796	0.220045	0.161889	0.282708	-0.005908
13337782	AT1G08985	2.90662	2.70402	2.94135	2.90662	2.77229	2.71946	2.68585	3.05828	2.90173	2.83865	2.76444	2.78402	3.13758	3.12419	3.10895	3.19722	3.05523	3.1115	3.13043	3.08212	3.03183	2.85752	2.89537	2.99803	0.230956	0.420172	0.167602	0.290595	0.282943	0.392034	-0.220775	0.35426	-0.039619	-0.067973	-0.007846	0.064561	-0.007142	-0.042069	-0.07712	-0.339691	-0.159862	-0.11347	0.213633	-0.396329	-0.037501	-0.271718	-0.152016	-0.178031
13337786	AT1G08990	2.98169	3.61835	3.38353	3.63394	3.18386	3.32102	3.24988	3.33449	2.96424	3.18747	3.18946	3.18118	3.68861	3.43088	3.43261	3.37538	3.42554	3.41022	3.24013	3.38899	3.73201	3.44497	3.12312	3.32916	0.706922	-0.187474	0.049073	-0.258559	0.241674	0.0892	0.268191	-0.283859	-0.419293	-0.44647	0.005593	-0.139841	-0.448474	-0.041888	0.299409	0.069593	-0.302415	-0.08106	-0.716665	0.241971	0.718702	0.516063	-0.308008	0.058781
13337791	AT1G09000	5.13001	5.4233	5.57589	5.45646	5.34317	5.91784	5.39374	5.56104	5.46488	5.01199	5.183	5.00848	5.84903	6.1424	5.98674	5.89509	5.8804	5.62481	5.82143	5.69775	6.06392	5.59245	5.92761	5.81075	0.719022	0.7191	0.410843	0.438637	0.537235	-0.293027	0.263731	0.13774	-0.111014	-0.444468	-0.160171	-0.909363	-0.027601	-0.444652	0.077184	-0.302645	0.047204	0.185933	-0.291332	-0.582392	0.188198	0.141823	0.207375	1.0953
13337808	AT1G09026	3.40706	3.52366	4.51856	3.70283	3.74017	3.54043	3.76064	4.14638	3.97857	3.61958	3.67725	3.99459	4.56733	3.90167	3.83518	4.02358	3.98883	4.68012	4.38563	4.0614	4.14766	4.04077	4.16003	4.50103	1.16028	0.378005	-0.683382	0.320758	0.248655	1.13968	0.353579	0.622719	-0.539985	-0.083252	-0.062921	0.454159	-0.181704	0.159733	0.312479	0.017185	0.171196	-0.179086	-0.535283	-0.462986	0.852464	0.100437	0.234117	-0.633245
13337810	AT1G09040	6.41658	6.36168	6.30591	5.9737	6.26025	5.98223	6.3226	6.44677	6.47611	6.32562	6.18494	6.44961	6.70787	6.86611	6.91846	6.60583	6.59036	6.54015	6.9103	6.67694	7.25168	6.36751	6.26898	6.37735	0.291285	0.50443	0.612554	0.632132	0.330104	0.557923	-0.093979	0.085089	0.1702	0.351922	-0.075313	0.467376	0.202428	-0.189175	0.333222	-0.238322	-0.321381	-0.162808	0.296407	-0.274264	0.163022	-0.590244	-0.246068	-0.630184
13337815	AT1G09050	6.15946	5.91654	6.08433	6.02505	6.20083	6.25796	6.39464	6.08433	6.70185	5.68302	6.05742	5.55321	5.15495	6.55178	6.29681	5.50962	5.91022	5.9616	5.79692	6.4279	6.10965	5.70313	6.08433	6.19097	-1.00451	0.635234	0.212483	-0.515437	-0.290607	-0.296352	0.235178	0.167787	0.617521	-0.342031	-0.143412	-0.704749	0.641972	-0.123878	-0.187158	0.193511	0.174104	0.229364	0.406794	-0.291665	-0.804679	0.535542	0.317516	0.934113
13337819	AT1G09070	10.1042	9.81766	9.94428	9.55442	9.79817	9.50221	9.9859	9.69272	9.85946	9.92415	9.73179	9.89405	9.95658	9.69767	9.82601	9.4984	10.0292	10.0518	10.2447	9.9764	9.62204	9.90948	9.94997	10.2569	-0.147626	-0.119992	-0.118272	-0.056019	0.231082	0.549617	-0.118314	-0.124935	-0.084829	0.369723	-0.066377	0.39184	0.288066	0.278737	-0.203968	0.411077	-0.07928	0.20511	0.40638	0.403672	-0.119139	0.041354	-0.012903	-0.18673
13337823	AT1G09090	3.91605	3.58591	4.09214	4.02022	4.07994	3.65516	4.14667	3.68443	3.54095	3.8457	3.88049	3.7132	3.97377	3.51799	4.04553	4.32233	3.70445	4.26886	4.11459	3.834	3.81222	4.02596	4.01153	4.18773	0.057719	-0.067918	-0.046612	0.302114	-0.375499	0.613699	0.23062	0.098519	-0.551197	-0.174523	-0.199459	0.058033	0.140825	0.316012	-0.233308	-0.29637	0.307081	-0.081137	-0.089795	0.217493	0.317889	-0.121847	0.50654	-0.13917
13337838	AT5G45720	6.79758	7.2115	7.05251	6.47852	7.11136	6.69415	6.54209	7.68302	6.96952	6.89066	6.3881	6.95481	7.06685	7.58404	6.92443	7.15024	7.32017	7.41235	7.13495	7.04526	6.46564	7.03991	7.79247	7.74834	0.269274	0.372548	-0.128082	0.671713	0.208801	0.718203	-0.255489	0.471527	-0.08299	0.412139	-0.723266	0.260667	0.068103	-0.538781	-0.458787	-0.110322	0.472301	0.335994	0.323592	-1.01031	-0.375797	-0.522461	1.19557	0.075327
13337840	AT1G09150	10.0181	9.92104	10.0504	9.98598	9.95985	9.94053	9.94299	10.0058	10.0264	10.0825	9.78648	9.83195	9.98598	10.1232	9.9816	10.0578	9.93242	10.0848	9.96694	10.0788	9.97317	10.1014	9.92448	10.0633	-0.0321	0.202183	-0.068771	0.07182	-0.027431	0.144228	-0.075087	0.084753	-0.02397	0.09655	-0.173375	-0.10858	-0.019039	-0.04441	-0.008433	0.04363	-0.007945	-0.02141	0.056048	-0.129163	0.015537	-0.05292	0.16543	0.08717
13337850	AT1G09176	5.07827	4.94829	4.7837	5.05314	5.39823	5.04779	4.91862	4.78282	5.02446	4.89619	5.18622	5.47208	5.37416	5.26253	5.21978	5.20338	5.06923	5.20604	5.3059	4.86464	5.27714	5.07329	5.11479	6.25342	0.29589	0.314236	0.436076	0.150239	-0.328998	0.158242	-0.159655	-0.165477	0.240753	-0.156953	-0.212007	0.424285	-0.068264	-0.397888	0.057363	-0.130086	0.045557	1.04738	0.091391	-0.232411	-0.18339	0.026867	0.257564	0.623099
13337852	AT1G09180	3.64336	3.5636	3.48328	3.92259	5.58115	5.10581	3.68333	4.14067	3.36935	4.33763	5.84746	6.23139	4.3134	4.11363	3.46779	4.29861	5.62418	4.32537	3.56054	3.93384	4.08648	3.63516	5.72269	4.98421	0.670048	0.550032	-0.015497	0.376013	0.043031	-0.780446	0.039979	0.577069	-0.113933	0.415034	0.26631	1.12558	-0.752863	-0.179788	0.618695	-0.663448	0.098507	0.658841	-0.792842	-0.756857	0.732628	-1.07848	-0.167803	-0.466741
13337858	AT1G09240	7.27956	6.51944	4.48773	5.80787	7.35415	8.02537	7.15587	6.67033	5.93128	5.94633	6.96918	8.11552	7.93537	7.9462	6.40373	6.36684	7.96972	7.9362	7.99027	7.9598	7.00927	6.17852	7.59965	8.3197	0.655817	1.42676	1.916	0.558968	0.615564	-0.089166	-0.123689	0.150891	1.44355	0.138464	-0.38497	0.090151	0.054903	0.013602	0.605546	-0.188314	-0.370064	0.383493	0.178592	-0.137289	-0.838003	-0.326778	0.014906	0.293342
13337862	AT1G09250	7.79081	7.98195	7.94173	7.17497	7.77958	7.03042	7.91569	7.77733	7.3195	6.95713	7.39729	6.81806	7.59826	7.68596	7.55595	7.43859	7.48684	7.38709	7.86982	7.79117	7.62839	7.3062	7.20272	7.17798	-0.192555	-0.295986	-0.385781	0.263623	-0.292745	0.356668	0.124873	-0.204616	-0.622238	-0.217841	-0.382291	-0.212364	0.271561	0.10521	0.072441	-0.132391	-0.284114	-0.209107	0.146688	0.309826	0.694679	0.08545	0.098177	0.003257
13337866	AT1G09260	2.7908	2.6557	2.7908	2.63348	3.05509	2.68851	2.73735	2.75041	2.62975	3.00507	2.19527	3.04154	2.54072	3.21834	3.32957	2.6934	2.42708	3.04118	2.52403	3.06122	2.94891	3.28611	3.17486	2.34697	-0.250078	0.562636	0.538763	0.059921	-0.628011	0.352667	-0.053448	0.094714	-0.161052	0.371588	-0.859825	0.353026	-0.016693	-0.157114	-0.380651	0.592706	0.747776	-0.694205	0.036755	-0.251828	-0.219599	0.221118	1.6076	-1.04723
13337868	AT1G09270	8.91818	8.98581	8.81769	8.7216	8.82841	8.79097	8.80617	8.94639	8.84044	8.82142	8.85865	8.81848	9.1827	9.11514	9.00361	9.02048	9.14041	9.24653	9.25353	9.10707	9.04078	9.05053	9.08887	9.23803	0.264524	0.129337	0.185925	0.298882	0.311997	0.455562	-0.112002	-0.039419	0.022754	0.09982	0.03024	0.027511	0.070829	-0.008077	0.037166	0.030049	-0.051542	-0.008497	0.182831	0.031342	0.014412	-0.069771	-0.081782	-0.036008
13337883	AT1G09300	8.30223	8.46412	8.42731	8.20261	7.91554	8.15876	8.23621	8.44128	8.34438	8.35553	8.32754	8.44783	8.45106	8.61547	8.54994	8.52771	8.26686	8.31961	8.36562	8.50856	8.6299	8.45759	8.47045	8.55884	0.14883	0.15135	0.122631	0.3251	0.351322	0.160856	-0.066019	-0.022845	-0.082932	0.152915	0.411998	0.289072	-0.085438	-0.106919	0.079962	-0.07012	0.203591	0.239229	-0.019419	-0.084074	0.162894	-0.223035	-0.208407	-0.049843
13337901	AT1G09310	11.214	11.298	11.5012	11.3305	11.5407	11.6091	11.2009	11.1883	11.5261	11.5414	11.5327	11.541	11.2741	11.3533	11.4663	11.2945	11.6179	11.5206	11.2432	11.2903	11.268	11.3074	11.6102	11.2478	0.0601	0.05533	-0.0349	-0.03599	0.0772	-0.08844	-0.01304	-0.1097	0.02498	0.21089	-0.00796	-0.06805	-0.03085	-0.06299	-0.19829	0.01289	-0.00764	-0.2728	-0.01781	0.04671	-0.22327	-0.198	0.00032	-0.20475
13337905	AT1G09340	11.129	10.7816	11.095	11.2951	11.5714	11.5691	11.069	10.527	11.0548	11.3603	11.3444	11.0757	11.2332	10.7598	11.1991	11.3189	11.4015	11.4696	11.0787	10.7284	11.0968	11.3245	11.3271	11.2243	0.10411	-0.02174	0.10411	0.02379	-0.16983	-0.09949	-0.06004	-0.25457	-0.0402	0.06513	-0.22691	-0.49342	-0.15447	-0.03149	-0.10223	0.00555	-0.07439	-0.24534	-0.09443	0.22308	-0.06203	-0.05958	0.15252	0.24808
13337918	AT1G09350	3.67495	3.78384	3.55267	3.38205	4.66657	4.34853	4.41422	3.45931	3.6936	3.25228	4.67486	3.44442	3.92161	3.8993	3.40524	3.60535	3.14703	3.60509	3.36569	3.42748	3.61375	3.50533	3.44708	3.41988	0.246664	0.115461	-0.147425	0.223294	-1.51954	-0.743437	0.739271	-0.324525	0.140934	-0.129778	0.008292	-0.904106	-0.555924	-0.471819	0.208509	-0.100014	0.300055	-0.185217	-1.2952	-0.147294	0.067575	0.029764	0.291763	0.718889
13337925	AT1G09360	2.25727	2.47286	2.41724	2.5661	2.50241	2.22126	2.47737	2.57433	2.65844	2.28473	2.64081	2.24225	2.25977	2.65939	2.3508	2.63071	2.39888	2.50241	2.66577	2.64081	2.64877	2.5596	2.23262	2.56881	0.002497	0.186534	-0.066447	0.064604	-0.103524	0.281144	0.220104	0.101476	0.241194	-0.281374	0.138406	0.020985	0.406005	-0.018578	0.297975	-0.071105	-0.166262	0.066407	0.185901	-0.120054	0.056781	0.210269	-0.304668	0.045422
13337927	AT1G09370	3.27335	3.05974	2.92502	3.27744	2.96369	3.3161	2.98112	3.1482	3.22576	3.26628	3.25922	2.77117	3.19385	2.95556	3.19385	3.52565	3.10846	2.80802	3.197	3.19385	3.99671	3.21311	3.26579	2.96553	-0.079507	-0.104182	0.268822	0.248214	0.144772	-0.508088	-0.29223	0.088463	0.300734	-0.011157	0.295529	-0.544932	0.003152	0.238286	0.802868	-0.312542	0.157335	0.157516	0.295382	0.149823	0.502134	-0.301385	-0.138194	0.702448
13337929	AT1G09390	9.3744	9.26484	8.79582	8.72007	9.41688	9.29384	9.38434	8.90148	8.25861	8.38399	9.25913	8.66579	8.34992	7.98811	7.4923	7.50264	8.79413	8.46553	8.37643	7.93448	7.6012	7.18524	8.20214	8.13289	-1.02448	-1.27673	-1.30352	-1.21742	-0.622749	-0.828308	0.009937	-0.363364	-0.537203	-0.336079	-0.157748	-0.628044	0.026517	-0.053629	0.1089	-0.317401	-0.591989	-0.332633	0.01658	0.309735	0.646103	0.018678	-0.434241	0.295411
13337937	AT1G09410	6.14867	7.17724	7.24846	6.57283	6.67401	6.39435	6.477	7.17376	7.15818	6.9944	6.38626	6.26591	6.29258	6.65732	6.85827	6.5929	5.87271	5.93018	5.95477	6.63267	6.81858	6.81815	6.68921	6.34976	0.143913	-0.519922	-0.390191	0.020073	-0.801304	-0.464172	0.328336	-0.003476	-0.090277	0.421574	-0.287747	-0.12844	-0.337812	-0.024649	-0.039687	0.225248	0.816498	0.419586	-0.666148	-0.021173	0.05059	-0.196326	1.10424	0.548026
13337939	AT1G09421	8.01379	8.30666	7.85203	8.13835	8.05106	7.57583	8.09543	8.74402	9.01629	8.20254	8.09396	7.87087	10.5323	10.6643	10.6873	10.5138	10.7106	10.4306	10.6656	10.8603	10.829	10.649	10.7302	10.2019	2.51852	2.35767	2.83527	2.37545	2.65959	2.85481	0.081638	0.437367	1.16427	0.064183	0.042899	0.295036	0.13326	0.19593	0.14167	0.13521	0.01959	-0.22875	0.051622	-0.241437	-1.02259	0.071027	-0.023309	-0.523786
13337943	AT1G09430	11.0645	10.9185	10.5272	10.7038	10.6671	10.4438	11.0463	10.9869	10.6618	10.6779	10.7459	10.7524	10.8633	10.6122	10.6202	10.6369	10.7524	10.4119	11.0206	10.8959	10.5127	10.7745	10.8182	10.6438	-0.20121	-0.30626	0.09297	-0.06689	0.08526	-0.03188	-0.01821	0.06847	0.13462	-0.02589	0.07879	0.30857	0.15726	0.28374	-0.10743	0.13764	0.0658	0.23187	0.17547	0.21527	-0.24205	0.16353	-0.01299	-0.0767
13337958	AT1G09450	6.03356	5.73051	5.35997	5.56322	5.58996	5.73511	5.54034	5.37363	5.09438	5.31865	5.5627	5.09164	5.5698	5.49627	5.74239	6.16986	6.2828	6.17771	5.80323	5.37018	5.61082	6.1329	5.9723	5.68632	-0.463766	-0.234247	0.38242	0.606639	0.692842	0.442597	-0.49322	-0.356883	-0.265581	-0.244575	-0.027265	-0.643468	0.233436	-0.126087	-0.131566	-0.036963	-0.310504	-0.491386	0.726656	0.230796	0.134015	0.207612	-0.283239	0.152082
13337975	AT1G09460	7.32609	6.2509	6.44696	5.85489	6.20912	5.56845	7.42248	6.35725	6.24743	5.79914	5.23711	4.86843	7.57117	6.79313	6.87784	6.16652	6.37821	5.65328	7.18766	6.86837	6.92443	6.17034	5.71032	5.71611	0.245081	0.542233	0.430881	0.311635	0.169086	0.08483	0.096394	0.106357	-0.19953	-0.055745	-0.97201	-0.700018	-0.383509	0.075238	0.046584	0.003815	-0.667885	0.062833	-0.479903	-0.031119	0.246114	0.05956	0.304125	0.762851
13337980	AT1G09480	5.58186	5.25885	6.03395	5.94663	5.99379	5.33234	5.60534	5.92218	6.19242	5.88862	5.79074	5.66528	6.60478	7.04781	6.44989	6.69747	7.1191	6.89238	7.0465	7.14336	7.57826	7.12009	7.21777	7.14896	1.02291	1.78896	0.415945	0.750843	1.12531	1.56004	0.023478	0.66333	0.158473	-0.058006	-0.203052	0.332941	0.441722	0.095549	1.12837	0.422617	0.098678	0.256587	0.418244	-0.567781	0.969894	0.480623	0.30173	-0.076354
13337987	AT1G09490	6.65005	6.73507	7.10429	6.64678	7.3115	7.20064	6.42427	6.63568	6.95017	6.49063	7.10404	7.11848	6.55736	6.86931	7.46823	6.66016	7.65956	7.5112	6.94106	7.28308	7.12051	6.84399	7.60649	7.40392	-0.092686	0.134246	0.363938	0.013378	0.348061	0.310558	-0.225783	-0.09939	-0.154114	-0.156152	-0.207453	-0.082166	0.383692	0.41377	-0.347712	0.183829	-0.05307	-0.107284	0.609475	0.51316	-0.193598	0.339981	0.154383	-0.025118
13337996	AT1G09500	4.24327	4.39392	4.30622	4.419	5.19007	5.6931	4.38714	4.67543	5.12878	4.47447	5.85067	7.71343	4.88196	4.93241	5.06504	4.99381	6.18839	6.39615	4.86137	5.99504	5.64511	6.19803	6.21523	8.14764	0.638695	0.538492	0.758822	0.57481	0.998325	0.703049	0.143873	0.281511	0.822559	0.05547	0.660598	2.02033	-0.020593	1.06263	0.580067	1.20422	0.026831	1.75149	-0.164466	0.781115	-0.242492	1.14875	-0.633767	-0.268835
13338006	AT1G09510	3.75042	4.07508	3.99457	4.25604	3.94103	3.82598	4.17474	3.92483	4.04242	4.16	4.34446	4.20604	4.68637	4.60232	4.06343	3.91855	4.14682	4.50192	4.04347	4.48118	4.6362	4.06835	4.23831	4.54284	0.935951	0.527239	0.068862	-0.337491	0.205797	0.675938	0.424327	-0.150257	0.04785	-0.09604	0.403435	0.38006	-0.642895	-0.121143	0.572768	0.149801	0.091481	0.040924	-1.06722	0.029114	0.524918	0.245841	-0.311954	-0.339136
13338013	AT1G09530	8.49084	8.47032	8.33682	7.61285	8.24297	8.48109	8.67582	8.78659	8.4321	7.54317	8.35813	8.62991	8.70309	8.66463	8.53584	7.58472	8.34824	8.28214	8.7105	8.6594	8.6998	7.443	8.04557	8.25049	0.21225	0.194312	0.199015	-0.028132	0.105264	-0.198951	0.184977	0.316267	0.095272	-0.069678	0.115159	0.148815	0.007406	-0.005231	0.163966	-0.141719	-0.302663	-0.031648	-0.177571	-0.321498	0.068694	-0.072041	-0.417822	-0.180463
13338024	AT1G09540	3.33627	2.88845	3.37538	3.29665	2.79487	2.87382	3.09184	3.14371	3.00415	3.2868	2.90774	2.87363	3.21962	3.22057	3.84064	3.80456	3.56465	3.17252	3.165	2.83422	3.36535	3.44436	2.93908	2.80813	-0.116657	0.332116	0.465256	0.507911	0.769774	0.2987	-0.244428	0.255257	-0.37123	-0.009854	0.112865	-0.000184	-0.054619	-0.386353	-0.475292	-0.360201	-0.625561	-0.364389	0.189809	-0.64161	-0.104062	-0.350347	-0.738426	-0.364205
13338030	AT1G09560	9.45103	8.81377	8.2897	9.13135	8.93153	8.96354	9.41207	8.98406	9.24403	9.08342	9.1502	9.72252	9.6721	9.25647	9.34132	9.46738	9.30076	9.30067	9.88759	9.75349	9.71003	9.69247	9.43967	9.67495	0.221072	0.442695	1.05162	0.336031	0.369233	0.337132	-0.038957	0.170289	0.954329	-0.047933	0.21867	0.758986	0.215485	0.497028	0.368705	0.225088	0.13891	0.374285	0.254442	0.326739	-0.585624	0.273021	-0.07976	-0.384701
13338035	AT1G09580	7.39762	7.21724	7.09899	6.95289	6.94781	7.22386	6.95221	7.20762	7.01199	6.65937	6.98012	6.76147	7.45576	7.71368	7.41346	7.12998	7.30295	7.42992	7.53894	7.48753	7.62738	6.79171	7.29933	7.41931	0.058141	0.496434	0.314473	0.177084	0.35514	0.206058	-0.445415	-0.009618	-0.086998	-0.293522	0.032313	-0.462392	0.083176	-0.226149	0.213918	-0.338264	-0.003619	-0.010611	0.528591	-0.216531	0.300916	-0.044742	-0.035932	0.451781
13338042	AT1G09590	7.22743	7.20282	7.304	7.41864	6.85556	7.71838	7.56252	7.35389	7.7689	7.45033	7.2986	7.39713	7.15775	7.41242	6.99931	6.80556	6.58436	7.14619	7.29524	7.05815	6.80523	7.24614	7.29526	7.01503	-0.069672	0.209599	-0.304691	-0.613084	-0.2712	-0.572191	0.335096	0.151071	0.4649	0.031689	0.443046	-0.321248	0.137485	-0.354268	-0.194082	0.440583	0.710899	-0.131162	-0.197611	-0.505339	-0.658982	0.408894	0.267853	0.190086
13338047	AT1G09600	5.0881	4.93088	5.28195	5.43054	5.27471	5.5767	4.68946	4.9599	4.97659	5.01024	5.08826	5.21493	5.4233	5.1657	5.39746	5.17028	5.94429	5.56715	5.52588	5.44409	5.35396	5.41917	5.52234	5.41465	0.3352	0.23482	0.115512	-0.260258	0.669579	-0.009552	-0.398638	0.02901	-0.305356	-0.420299	-0.186452	-0.361766	0.102584	0.27838	-0.043498	0.248893	-0.421953	-0.152491	0.501222	0.24937	0.261858	0.669192	-0.235501	0.209275
13338055	AT1G09610	6.57712	6.53828	6.36445	6.69235	6.30249	6.40408	6.31534	6.26456	6.14007	6.32353	6.30249	6.40574	6.35609	6.5148	6.43504	6.0564	6.266	6.30249	6.34308	6.32693	6.35945	5.91887	6.44158	6.24891	-0.221033	-0.023476	0.070589	-0.635952	-0.036494	-0.101595	-0.261777	-0.273716	-0.224381	-0.368814	0	0.001655	-0.013013	-0.187871	-0.075592	-0.137529	0.175585	-0.053576	0.248764	0.085845	0.148789	0.231285	0.175585	-0.055231
13338059	AT1G09640	10.8747	10.9935	10.8407	10.9231	10.674	10.9265	10.7988	10.9208	11.0351	11.0528	10.757	10.7896	10.9481	10.7984	11.003	10.9019	10.7275	10.8959	10.8895	10.9629	10.8962	11.0026	10.8806	10.8398	0.07343	-0.19505	0.16232	-0.02123	0.05345	-0.03061	-0.07592	-0.07272	0.19445	0.12971	0.08297	-0.13691	-0.05866	0.16444	-0.10682	0.1007	0.15309	-0.05607	0.01726	0.23716	-0.30127	-0.02901	0.07012	0.08084
13338072	AT1G09645	9.65594	9.398	9.22783	9.23265	9.39263	9.07627	9.68616	9.37277	9.23653	9.38305	9.21995	9.12108	9.73708	9.50491	9.499	9.54831	9.43616	9.49806	9.95161	9.84334	9.47547	9.81849	9.55001	9.56632	0.081141	0.106913	0.271167	0.315654	0.043536	0.421795	0.030222	-0.025232	0.0087	0.1504	-0.172671	0.044813	0.214526	0.338429	-0.023522	0.270188	0.113847	0.068255	0.184304	0.363661	-0.032222	0.119788	0.286518	0.023442
13338077	AT1G09650	3.23217	3.65749	3.23575	3.29431	3.1718	3.26791	2.87299	3.17928	3.33611	3.38383	3.15717	3.13036	3.33611	3.45372	3.70864	3.17806	3.60257	3.49674	3.60735	3.52991	3.3677	3.61858	3.44098	3.1144	0.103933	-0.203775	0.472897	-0.116249	0.430761	0.228824	-0.359187	-0.478212	0.100361	0.089525	-0.014632	-0.13755	0.271241	0.076195	-0.34094	0.440527	-0.161586	-0.382336	0.630428	0.554407	-0.441301	0.351002	-0.146954	-0.244786
13338081	AT1G09665	4.84734	5.23749	5.07018	4.37154	4.70207	5.40832	4.16589	5.4314	3.98626	4.19864	4.76818	5.17433	3.54818	4.43569	3.8368	4.12116	4.16849	4.24549	3.71257	4.27486	3.58986	3.76235	4.868	3.63113	-1.29916	-0.801798	-1.23338	-0.250376	-0.533577	-1.16283	-0.681445	0.193912	-1.08392	-0.172898	0.066118	-0.233986	0.164396	-0.160828	-0.246946	-0.358807	0.699508	-0.614359	0.845841	-0.35474	0.836977	-0.185909	0.63339	-0.380373
13338084	AT1G09710	7.04361	7.61819	7.68403	7.58469	7.40481	6.89737	7.16047	7.40139	7.53703	7.5882	7.28333	6.74208	6.7102	7.31238	7.57452	7.73347	6.94032	6.74087	6.21422	7.11664	7.49186	7.3538	6.97578	6.25051	-0.33341	-0.305809	-0.109509	0.148771	-0.464495	-0.156498	0.116853	-0.2168	-0.147005	0.003508	-0.121485	-0.155287	-0.495979	-0.195746	-0.08266	-0.379665	0.035462	-0.490363	-0.612832	0.021054	0.064345	-0.383173	0.156947	-0.335076
13338096	AT1G09740	7.30208	7.14284	7.07836	7.60231	7.37747	7.85881	7.39812	7.75227	7.4226	7.68599	7.7394	8.14223	7.18582	7.30504	7.57219	7.99218	7.6207	7.68643	7.5507	7.77214	7.69423	7.80782	7.84922	7.92805	-0.116264	0.162198	0.493828	0.389872	0.243235	-0.172384	0.096037	0.609429	0.344237	0.083686	0.361934	0.283414	0.364881	0.467104	0.122043	-0.184357	0.228513	0.241625	0.268844	-0.142325	-0.222194	-0.268043	-0.133421	-0.041789
13338103	AT1G09750	10.9174	11.2566	11.366	11.2356	10.9873	10.8918	10.9372	10.9375	11.2553	11.1272	10.7845	9.4225	10.7886	11.259	11.3827	11.2177	10.8963	11.0213	10.6122	11.0189	11.2466	11.1848	10.8844	10.7119	-0.12873	0.00239	0.01669	-0.01788	-0.09097	0.1295	0.01986	-0.31903	-0.11065	-0.10844	-0.20277	-1.46929	-0.17639	-0.24011	-0.13612	-0.03291	-0.01188	-0.30943	-0.19625	0.07892	-0.02547	0.07553	0.19089	1.15986
13338108	AT1G09770	10.9955	11.0691	11.0972	11.1572	10.8492	10.7439	11.0274	11.1074	11.0576	11.1921	10.7949	10.8606	10.9763	11.1045	11.2006	11.3072	10.9984	10.8478	11.0545	11.0432	11.0894	11.2151	10.9481	10.8671	-0.01929	0.03538	0.10345	0.14995	0.14918	0.10393	0.03187	0.03825	-0.0396	0.03483	-0.05434	0.11669	0.07822	-0.06133	-0.11126	-0.09207	-0.05035	0.01929	0.04635	-0.09958	-0.07166	-0.1269	0.00399	-0.0974
13338115	AT1G09794	6.9891	6.55811	6.12842	6.45414	5.99745	6.59009	6.82149	6.39774	6.90529	6.42392	6.15792	6.94874	7.18092	7.19859	6.91012	7.09571	6.65337	7.21148	7.55007	7.06514	7.08975	7.06869	7.14436	7.23942	0.191818	0.640475	0.781697	0.641563	0.655929	0.621392	-0.167613	-0.160373	0.776871	-0.030229	0.160479	0.358651	0.36915	-0.133447	0.179633	-0.027019	0.490982	0.027937	0.536763	0.026926	-0.597238	0.00321	0.330503	-0.330714
13338120	AT1G09795	9.89737	10.1279	10.1448	9.73234	9.48741	9.93036	9.89697	10.136	10.0582	9.64366	9.45195	9.54411	9.89103	10.0173	9.95045	9.63113	9.24062	9.64378	9.78368	9.94617	10.1572	9.49035	9.26054	9.49212	-0.006343	-0.11066	-0.194353	-0.101204	-0.24679	-0.286576	-0.000404	0.00805	-0.08658	-0.088675	-0.03546	-0.386245	-0.107354	-0.071085	0.206713	-0.140787	0.019925	-0.151663	-0.10695	-0.079135	0.293293	-0.052112	0.055385	0.234582
13338134	AT1G09812	5.85819	5.57343	5.62761	5.99003	5.43398	5.58267	5.73949	5.1526	5.12959	6.16386	5.29082	5.18492	5.64152	5.85518	6.1432	6.75229	5.50595	6.17132	5.93137	5.72675	5.91315	6.45256	5.79471	5.79346	-0.216674	0.281751	0.515589	0.762259	0.071966	0.588649	-0.118704	-0.42083	-0.498025	0.173831	-0.143167	-0.397756	0.289853	-0.128425	-0.230048	-0.299726	0.288762	-0.377864	0.408557	0.292405	0.267977	-0.473557	0.431929	0.019892
13338137	AT1G09815	8.25482	7.97077	7.70819	7.7382	7.52804	7.72789	8.13502	8.00629	7.81191	7.71592	7.6209	7.77854	8.33308	7.9265	7.86876	8.1618	8.09229	8.44518	8.48847	8.37561	8.26719	8.36277	8.21743	8.31405	0.078261	-0.04427	0.160569	0.423605	0.564249	0.717288	-0.119803	0.035518	0.103728	-0.022278	0.09286	0.050657	0.155387	0.449103	0.398439	0.200969	0.125135	-0.131121	0.27519	0.413585	0.294711	0.223247	0.032275	-0.181778
13338142	AT1G09850	9.02074	9.59108	9.87467	9.68707	9.13049	9.46447	9.1466	9.58121	9.85181	9.76334	9.44944	9.67446	8.61536	9.48196	9.54529	9.35357	8.88861	9.18529	8.85786	9.44141	9.64787	9.45867	9.1508	9.45357	-0.405379	-0.109121	-0.329375	-0.333495	-0.241885	-0.279172	0.125865	-0.009872	-0.022857	0.076279	0.318949	0.209989	0.242498	-0.040549	0.10258	0.105104	0.262199	0.268274	0.116633	-0.030677	0.125437	0.028825	-0.05675	0.058285
13338150	AT1G09870	8.39111	8.78077	8.66989	8.78079	8.68297	8.64477	8.45614	8.67828	8.6635	8.82784	8.67639	8.87749	8.67408	8.87763	8.82949	8.70722	8.64914	8.81798	8.6113	8.85919	8.93908	8.81489	8.82869	9.01254	0.282973	0.09686	0.1596	-0.073565	-0.033823	0.173208	0.065025	-0.102491	-0.006382	0.047046	-0.006578	0.232715	-0.062779	-0.018441	0.109592	0.107663	0.17955	0.194562	-0.127804	0.08405	0.115974	0.060617	0.186128	-0.038153
13338164	AT1G09900	8.68107	8.87573	9.06802	9.11481	8.50928	8.76935	8.60175	9.0584	8.9187	8.91396	8.66924	8.48042	8.5409	8.5859	8.75404	8.90459	8.42093	8.6771	8.20959	8.45597	8.45982	8.62848	8.33133	8.5879	-0.14017	-0.289828	-0.313985	-0.210213	-0.088346	-0.092248	-0.079321	0.182671	-0.149327	-0.200842	0.159964	-0.288937	-0.331314	-0.12993	-0.294218	-0.276115	-0.089602	-0.089201	-0.251993	-0.312601	-0.144891	-0.075273	-0.249566	0.199736
13338166	AT1G09960	7.18041	7.18355	7.29245	7.7913	7.3138	7.38371	7.10344	7.20346	7.25709	7.79748	7.43787	7.2185	6.9382	7.115	7.05654	7.31981	6.97964	6.82779	7.19208	6.89731	7.06086	7.56578	7.11924	6.87629	-0.242212	-0.068551	-0.235902	-0.471488	-0.33416	-0.555928	-0.076977	0.019916	-0.035352	0.006183	0.124075	-0.165211	0.253879	-0.217685	0.004319	0.245968	0.1396	0.048501	0.330856	-0.237601	0.039671	0.239785	0.015525	0.213712
13338174	AT1G09970	9.50672	8.87775	8.98797	8.7421	8.62279	8.22011	9.44281	9.18606	9.47493	9.21197	8.80928	9.06787	9.83448	9.50913	9.48837	9.26903	8.99189	8.8407	10.1174	9.80972	9.63644	9.65528	9.24377	9.23007	0.327755	0.63138	0.500401	0.52693	0.369103	0.62059	-0.063913	0.308308	0.486964	0.46987	0.186488	0.847758	0.28291	0.300587	0.148073	0.386254	0.251875	0.389365	0.346823	-0.007721	-0.338891	-0.083616	0.065387	-0.458393
13338181	AT1G10010	3.84669	4.05661	3.9052	4.45	4.10229	3.70147	4.18395	4.23126	3.85624	4.00496	4.00573	4.42393	4.27713	4.3497	4.34349	4.10057	4.07894	4.74479	4.77217	4.18274	4.41255	4.43504	4.0326	4.47767	0.430445	0.293092	0.438284	-0.349426	-0.02335	1.04332	0.337265	0.174644	-0.048959	-0.445034	-0.096566	0.722456	0.495042	-0.166968	0.069061	0.334465	-0.04634	-0.267122	0.157777	-0.341612	0.11802	0.779499	0.050226	-0.989578
13338188	AT1G10030	8.19744	8.19185	8.07532	8.24905	8.04998	8.10281	8.15801	7.76609	7.86442	7.76159	8.07076	7.88149	8.27746	8.17488	8.30565	7.83737	8.0448	8.17857	8.15667	7.95463	8.07852	7.93941	8.25612	8.09298	0.08002	-0.016966	0.230338	-0.411676	-0.005184	0.075757	-0.039427	-0.425764	-0.210899	-0.487461	0.020776	-0.221322	-0.12079	-0.220252	-0.227131	0.102039	0.211322	-0.085593	-0.081363	0.205512	-0.016232	0.5895	0.190546	0.135729
13338194	AT1G10050	7.51942	7.6376	6.98679	6.72077	7.42752	7.70897	7.86899	7.79283	7.36289	7.01561	7.73332	8.03867	7.76286	7.57879	7.73285	7.31929	7.74036	7.55533	7.80714	7.61705	7.60164	7.37324	7.57004	7.74322	0.24344	-0.058807	0.746059	0.598523	0.312838	-0.153644	0.349565	0.155233	0.3761	0.294837	0.305799	0.329698	0.044276	0.038259	-0.131216	0.053942	-0.170325	0.187888	-0.305289	-0.116974	-0.507316	-0.240895	-0.476124	-0.14181
13338203	AT1G10060	9.86285	9.31264	8.94433	8.69301	8.72796	8.65926	9.69645	9.49306	8.63905	8.60134	8.33458	8.10364	9.68885	9.14729	9.01031	8.37981	8.3575	8.48818	9.54558	9.2686	8.8615	8.31505	8.0073	8.01289	-0.174003	-0.165354	0.06598	-0.3132	-0.370466	-0.171085	-0.166406	0.180424	-0.305284	-0.091671	-0.393382	-0.555624	-0.143275	0.121311	-0.148818	-0.064756	-0.350192	-0.475285	0.023131	-0.059113	0.156466	0.026915	0.04319	0.080339
13338220	AT1G10070	9.29399	8.99092	7.57261	7.63155	8.51244	7.42244	9.5708	9.66425	8.48574	8.20912	8.16697	8.82716	9.29859	8.81214	8.51461	8.9265	8.4272	7.64565	9.77641	9.60685	9.05361	9.16086	7.8437	8.66834	0.004594	-0.178781	0.941997	1.29495	-0.085247	0.223207	0.276811	0.673323	0.913128	0.577569	-0.345471	1.40472	0.477818	0.794711	0.539	0.234357	-0.583495	1.02269	0.201007	0.121388	-0.374128	-0.343212	-0.238024	-0.382036
13338235	AT1G10110	3.70582	3.51489	3.72816	4.24423	3.64559	3.82407	3.50671	3.70071	3.45673	3.7954	4.19736	4.21708	3.29949	4.12745	3.6284	3.99574	3.73365	3.35755	3.77521	4.00485	3.69418	3.71161	3.52107	4.23086	-0.406335	0.612559	-0.099764	-0.248488	0.08806	-0.466523	-0.19911	0.185825	-0.271431	-0.448833	0.551769	0.393009	0.475722	-0.122602	0.065782	-0.284135	-0.212575	0.873306	0.674832	-0.308427	0.337213	0.164698	-0.764344	0.480297
13338239	AT1G10130	9.41054	9.67066	9.65119	9.47894	9.5404	9.42521	9.52756	9.59943	9.688	9.51425	9.60751	9.64903	9.75756	9.79416	9.94897	9.81185	9.86284	9.73363	9.68582	9.78095	9.94969	9.68148	9.91787	9.86358	0.347024	0.123503	0.297777	0.332907	0.322438	0.308417	0.11702	-0.071232	0.036808	0.035308	0.067107	0.223822	-0.071738	-0.01321	0.000719	-0.130368	0.055031	0.129947	-0.188758	0.058022	-0.036089	-0.165676	-0.012076	-0.093875
13338269	AT1G10150	9.16486	8.92182	8.7581	8.88511	9.08798	8.77243	9.07451	8.79711	8.71445	8.7784	8.90258	8.41549	9.04257	8.84829	8.95915	8.86787	9.20596	8.77906	9.10154	9.00688	8.65326	9.01565	8.85586	8.63619	-0.122293	-0.073525	0.20105	-0.017246	0.117977	0.006633	-0.090354	-0.124707	-0.043652	-0.106714	-0.185405	-0.356932	0.058971	0.158586	-0.305887	0.147784	-0.350094	-0.142868	0.149325	0.283293	-0.262235	0.254498	-0.164689	0.214064
13338273	AT1G10210	7.96002	7.94332	7.92698	7.62113	7.56425	7.47481	7.89761	8.02051	7.94452	7.58162	7.8412	7.94026	8.38512	8.45336	8.37944	8.13886	8.44035	7.91639	8.52403	8.42643	8.60149	7.79475	8.26307	7.94874	0.425097	0.510039	0.45246	0.517725	0.876095	0.441574	-0.062415	0.077187	0.01754	-0.039517	0.276951	0.465445	0.138915	-0.026932	0.222044	-0.344112	-0.177272	0.032357	0.20133	-0.104119	0.204504	-0.304595	-0.454223	-0.433088
13338279	AT1G10220	4.84284	5.40801	5.08616	5.23766	4.63226	4.64049	4.75653	5.47007	4.87917	4.76318	4.32772	4.69925	4.63226	4.49094	4.6504	4.38055	4.46639	4.4702	4.9147	4.54911	4.51875	4.3985	4.53311	4.52007	-0.210578	-0.917074	-0.435753	-0.857115	-0.165873	-0.170285	-0.086309	0.062057	-0.206992	-0.474489	-0.304544	0.058761	0.282432	0.058169	-0.131653	0.017948	0.066723	0.049868	0.368741	-0.003888	0.075339	0.492437	0.371267	-0.008893
13338284	AT1G10230	6.80565	6.8115	6.74157	6.07993	6.14648	6.53695	6.23632	6.59291	7.05173	6.01544	6.1965	6.11169	7.4882	7.62083	7.48349	6.39589	6.9999	7.47814	7.83917	7.61037	7.99436	6.8189	7.22687	7.45237	0.682551	0.809332	0.741923	0.315959	0.853415	0.941189	-0.569323	-0.218595	0.310163	-0.064487	0.050016	-0.42526	0.350972	-0.010461	0.510868	0.423011	0.226978	-0.025767	0.920295	0.208134	0.200705	0.487498	0.176962	0.399493
13338288	AT1G10270	7.05746	7.34318	7.21305	7.03168	6.61518	6.57619	7.12952	7.31423	7.21266	6.85583	6.86533	6.62827	7.45414	7.4999	7.29485	7.1642	6.98356	7.23628	7.29925	7.44312	7.24698	7.076	7.13788	7.54613	0.396677	0.156713	0.081803	0.132523	0.368385	0.660087	0.072054	-0.028952	-0.000394	-0.175849	0.250149	0.052081	-0.154894	-0.056777	-0.04787	-0.088207	0.154323	0.309857	-0.226948	-0.027825	-0.047476	0.087642	-0.095826	0.257776
13338291	AT1G10290	9.22028	9.19745	9.26982	9.26339	9.28531	9.07592	9.1895	9.18722	9.29768	9.22474	9.18196	9.42125	9.5862	9.48885	9.29641	9.40061	9.40812	9.41155	9.60963	9.36907	9.43019	9.2601	9.4941	9.46927	0.365929	0.291401	0.02659	0.137215	0.122802	0.33563	-0.030775	-0.010232	0.027853	-0.038652	-0.103357	0.345333	0.023424	-0.11979	0.133779	-0.140501	0.08599	0.057716	0.054199	-0.109558	0.105926	-0.101849	0.189347	-0.287617
13338311	AT1G10300	3.16699	3.13689	3.10379	3.34029	3.01593	3.32605	3.34246	4.50236	3.16956	3.78519	3.3464	3.60217	3.42811	3.25675	3.33728	3.64745	3.08584	3.23338	3.45202	2.9628	3.36463	3.15266	3.47214	2.70044	0.261118	0.119867	0.233486	0.30716	0.069915	-0.092676	0.175475	1.36547	0.065771	0.444899	0.330466	0.276124	0.023918	-0.293953	0.027346	-0.494791	0.386292	-0.532937	-0.151557	-1.65943	-0.038425	-0.93969	0.055826	-0.809061
13338314	AT1G10330	6.14509	6.14986	5.80053	6.85492	6.42031	6.5054	6.21122	6.54044	5.93058	6.56043	6.64437	6.40202	6.21229	6.28269	5.90188	6.41218	6.66517	6.27807	6.03644	6.33129	6.46184	6.36821	6.61865	6.93421	0.0672	0.132827	0.101354	-0.442743	0.244869	-0.227327	0.066126	0.39058	0.130047	-0.294495	0.224064	-0.10338	-0.175854	0.048596	0.559956	-0.043972	-0.046524	0.65614	-0.24198	-0.341984	0.429909	0.250523	-0.270588	0.75952
13338316	AT1G10380	6.64825	7.21982	7.41753	7.11044	7.19194	6.68579	6.7122	7.11791	7.13518	7.09241	6.86343	5.65339	6.74677	6.94072	7.04077	6.5881	6.93658	6.29166	6.89074	7.26804	6.9403	6.33437	6.60675	5.80518	0.098516	-0.2791	-0.376766	-0.522338	-0.25536	-0.394131	0.063949	-0.101911	-0.282348	-0.018026	-0.32851	-1.0324	0.143978	0.327321	-0.100462	-0.253727	-0.329827	-0.486477	0.080029	0.429232	0.181886	-0.235701	-0.001317	0.545919
13338322	AT1G10385	4.16311	4.18314	4.17703	4.51745	4.16972	4.27935	4.20996	3.98712	3.84607	3.90088	3.90275	4.16972	5.01983	4.33273	4.92029	4.16972	4.10909	4.13565	4.19012	3.9895	4.02896	4.13535	4.67814	4.087	0.856719	0.149593	0.743261	-0.347721	-0.060639	-0.143702	0.046853	-0.196023	-0.330959	-0.616563	-0.266969	-0.109629	-0.829705	-0.343234	-0.891324	-0.034371	0.569053	-0.048653	-0.876558	-0.147211	-0.560365	0.582192	0.836022	0.060976
13338328	AT1G10450	8.60051	8.73518	8.56274	8.93644	8.4377	8.40278	8.56707	8.65441	8.65979	8.79187	8.40404	8.45555	8.53742	8.55879	8.43376	8.80753	8.46703	8.55633	8.53566	8.34094	8.5742	8.78217	8.30832	8.45436	-0.063091	-0.176395	-0.128976	-0.128913	0.029329	0.153551	-0.033441	-0.080773	0.097056	-0.144569	-0.033668	0.052778	-0.001758	-0.217843	0.140438	-0.025361	-0.158714	-0.101962	0.031683	-0.13707	0.043382	0.119208	-0.125046	-0.15474
13338346	AT1G10455	2.78754	2.79482	2.40445	3.24962	2.9181	3.29789	2.95708	2.58401	2.78698	2.83619	3.29745	3.17978	3.1067	2.80227	2.77649	2.78475	2.31334	3.04065	2.77982	3.61084	2.8221	2.62433	2.64471	2.7722	0.319166	0.007455	0.372036	-0.46487	-0.604763	-0.257241	0.169542	-0.210804	0.382526	-0.413436	0.379352	-0.118112	-0.326882	0.808564	0.045613	-0.160417	0.331371	-0.268448	-0.496424	1.01937	-0.336913	0.253019	-0.047981	-0.150336
13338348	AT1G10480	3.78286	3.65965	3.61876	3.76033	3.06119	4.00818	3.70921	3.53611	3.4448	3.5004	3.41128	3.36461	3.9475	3.81574	3.82309	3.58042	3.79459	3.97313	3.78704	3.65876	3.74623	3.71976	3.93001	3.70498	0.164641	0.156083	0.204329	-0.179915	0.733408	-0.035045	-0.073655	-0.123545	-0.173954	-0.259929	0.350094	-0.643564	-0.160464	-0.156976	-0.076857	0.139345	0.135414	-0.268148	-0.086809	-0.033431	0.097097	0.399274	-0.21468	0.375416
13338352	AT1G10490	7.73629	7.63396	7.84167	7.78119	6.82894	7.61363	7.68109	7.84594	7.83155	7.70459	7.70592	8.02496	7.61182	7.73335	7.86109	7.55838	7.32523	7.92433	7.61974	7.58989	7.92528	7.60814	7.47898	8.01157	-0.124464	0.099394	0.01942	-0.222811	0.496286	0.310708	-0.055197	0.211983	-0.010121	-0.076594	0.876976	0.411332	0.007918	-0.143464	0.064187	0.049761	0.153753	0.087234	0.063115	-0.355447	0.074308	0.126355	-0.723223	-0.324098
13338378	AT1G10510	8.89414	9.16009	9.32661	9.25196	9.21361	9.29533	8.9537	9.20538	9.36281	9.31913	9.21622	8.93399	9.2544	9.22166	9.38827	9.26662	9.36341	9.53587	9.09345	9.26242	9.41789	9.37292	9.2391	9.4346	0.360257	0.061573	0.061658	0.014662	0.149807	0.240533	0.059561	0.045291	0.0362	0.067165	0.002615	-0.361347	-0.160945	0.040752	0.029621	0.106298	-0.124313	-0.101271	-0.220506	-0.004539	-0.006579	0.039133	-0.126928	0.260076
13338398	AT1G10520	5.31485	4.65403	4.58347	4.66901	4.94619	5.00062	5.05146	5.03759	4.73073	5.24557	5.17673	4.55879	4.77963	4.83693	4.46556	4.85591	5.01841	4.94137	5.0048	4.86945	5.00716	4.51286	4.8297	4.97015	-0.535226	0.182898	-0.117917	0.186893	0.07222	-0.059248	-0.263391	0.38356	0.147252	0.576558	0.230535	-0.441832	0.225179	0.032523	0.541606	-0.343049	-0.188714	0.028779	0.48857	-0.351037	0.394354	-0.919607	-0.419249	0.470611
13338413	AT1G10522	6.78171	6.9983	7.21201	6.96409	6.7735	6.9924	6.57636	6.70294	7.29723	6.78561	6.73243	6.33433	6.70724	6.86732	6.70883	6.66831	6.19205	7.06762	6.52986	6.81857	7.08632	6.48028	6.84954	7.11231	-0.074462	-0.130977	-0.503177	-0.295776	-0.581455	0.075214	-0.205342	-0.295355	0.085215	-0.178473	-0.041072	-0.658074	-0.177388	-0.048749	0.377486	-0.188034	0.657486	0.044686	0.027954	0.246606	0.292271	-0.009561	0.698558	0.70276
13338422	AT1G10560	4.18048	4.39112	4.37258	3.90489	4.02726	3.97289	4.35056	3.8206	3.93567	4.55546	4.14165	4.07054	4.65993	4.85445	4.74018	4.59329	4.69336	4.35359	4.62899	4.79949	4.11669	4.32326	4.22415	4.56976	0.479451	0.46334	0.3676	0.688407	0.666095	0.380698	0.170077	-0.570518	-0.43691	0.650573	0.114388	0.097644	-0.030941	-0.054962	-0.623491	-0.270032	-0.4692	0.216166	-0.201018	0.515556	-0.186581	-0.920605	-0.583588	0.118522
13338426	AT1G10570	8.01583	7.83364	8.06266	8.61863	7.96993	7.93544	7.66708	7.92931	8.00998	8.67482	7.87213	7.93118	7.61348	7.78829	7.65387	8.55342	7.86919	7.68682	7.66026	7.84059	7.67526	8.34477	7.97151	7.55206	-0.402359	-0.045351	-0.408791	-0.065212	-0.100734	-0.248623	-0.348757	0.095665	-0.052679	0.056185	-0.097801	-0.004255	0.046781	0.0523	0.021386	-0.208652	0.102315	-0.13475	0.395538	-0.043365	0.074065	-0.264837	0.200116	-0.130495
13338442	AT1G10588	2.20255	2.16235	2.3977	2.08996	2.18395	2.30425	2.27469	2.22365	2.05963	2.11085	2.13635	2.18515	2.47557	2.38872	2.46604	2.43459	2.34061	2.22388	2.24883	2.29509	2.54952	2.2466	2.13452	2.16598	0.273027	0.226376	0.068337	0.344631	0.156665	-0.080373	0.072146	0.061307	-0.338076	0.020887	-0.047601	-0.119102	-0.226745	-0.093627	0.083476	-0.187988	-0.206096	-0.057899	-0.298891	-0.154934	0.421552	-0.208875	-0.158495	0.061203
13338448	AT1G10600	7.3491	7.55025	7.44742	7.35281	7.7661	7.39839	7.60752	7.56007	7.39188	7.53177	7.58778	7.32583	7.46506	7.71434	7.68451	7.46315	7.83697	7.39489	7.45791	7.7596	7.75158	7.35702	7.65342	7.4697	0.115957	0.164087	0.237094	0.110341	0.070863	-0.003503	0.258418	0.009817	-0.055542	0.178958	-0.178321	-0.072568	-0.007151	0.045262	0.067065	-0.106133	-0.183544	0.074811	-0.265569	0.035445	0.122607	-0.285091	-0.005223	0.147379
13338459	AT1G10610	8.52633	8.93215	9.06231	8.72016	8.42804	8.32419	8.70633	8.90194	8.84776	8.81212	8.3442	7.95884	8.80118	9.12477	9.15234	9.16648	8.91155	8.64641	8.63528	9.18481	9.27394	9.23848	8.65006	8.38813	0.274844	0.192618	0.090036	0.446316	0.483505	0.322228	0.180004	-0.030214	-0.214549	0.091962	-0.083843	-0.365343	-0.1659	0.060035	0.121596	0.072007	-0.261487	-0.258289	-0.345904	0.090249	0.336145	-0.019955	-0.177644	0.107054
13338470	AT1G10652	4.15309	4.62073	4.73318	3.92951	3.87049	4.32024	4.6221	4.84111	4.52448	4.45394	5.04873	5.26245	5.05771	4.85058	4.73017	4.6048	4.82642	4.53817	5.43382	4.65048	4.75669	4.46411	4.27708	4.75659	0.904626	0.229855	-0.003016	0.675284	0.955929	0.217928	0.469012	0.22038	-0.208704	0.524424	1.17824	0.942213	0.376111	-0.200104	0.026517	-0.140686	-0.549341	0.218419	-0.092901	-0.420484	0.235221	-0.66511	-1.72759	-0.723794
13338472	AT1G10657	7.68159	7.35462	7.30003	7.70019	8.315	8.12697	7.83219	6.8617	7.20339	7.60714	8.09487	7.45362	7.61639	7.03904	7.05531	7.46595	7.7762	7.12282	7.39594	7.362	7.40511	7.34567	7.34024	7.02407	-0.065197	-0.315573	-0.244716	-0.234235	-0.538804	-1.00416	0.150595	-0.492919	-0.096635	-0.093048	-0.220127	-0.673353	-0.220453	0.322955	0.349804	-0.120283	-0.435954	-0.09874	-0.371048	0.815874	0.446439	-0.027235	-0.215827	0.574613
13338483	AT1G10660	9.74763	10.0538	10.2261	10.5776	10.1447	9.93026	9.8644	9.99415	10.2765	10.6598	10.0018	9.84761	9.87567	10.0586	10.3883	10.6041	10.2157	9.91563	9.85104	10.1187	10.3564	10.7474	10.2146	9.96105	0.128042	0.00479	0.16216	0.02648	0.07103	-0.014637	0.116775	-0.05969	0.05041	0.08222	-0.14282	-0.082649	-0.024632	0.06002	-0.03194	0.14331	-0.00113	0.045426	-0.141407	0.11971	-0.08235	0.06109	0.14169	0.128075
13338495	AT1G10670	9.70787	9.68625	9.56205	9.721	9.79809	9.71191	9.60912	9.60981	9.69762	9.84131	9.69783	9.51477	9.86419	9.75538	9.76804	9.74907	9.74029	9.70075	9.88705	9.73489	9.68626	9.81948	9.54508	9.54654	0.156314	0.069132	0.205992	0.028067	-0.057799	-0.01116	-0.098755	-0.076437	0.135565	0.120306	-0.100264	-0.197141	0.02286	-0.020493	-0.081786	0.070408	-0.195213	-0.154208	0.121615	0.055944	-0.217351	-0.049898	-0.094949	0.042933
13338511	AT1G10700	8.36761	8.03073	7.77966	7.89116	8.21545	8.10804	8.43487	8.38877	8.11246	7.90043	8.58496	8.7475	8.51243	8.37195	7.88662	8.0078	8.17624	8.53085	9.05876	8.69881	8.37954	8.3768	8.52201	8.95273	0.144822	0.341213	0.106957	0.116643	-0.039212	0.42281	0.067261	0.35804	0.332791	0.009275	0.369513	0.63946	0.546335	0.326866	0.492918	0.368993	0.345774	0.421881	0.479074	-0.031174	0.160127	0.359718	-0.023739	-0.217579
13338521	AT1G10710	3.6468	3.65387	3.73769	3.66579	3.78389	3.85635	3.62006	3.60932	3.3353	3.35591	3.6515	3.61269	3.47051	3.46438	3.336	3.54131	3.50143	3.58209	3.88284	3.39025	3.38336	3.61104	3.43057	3.83891	-0.176285	-0.189494	-0.401694	-0.124478	-0.28246	-0.274261	-0.026733	-0.044556	-0.402391	-0.309876	-0.132392	-0.243668	0.412331	-0.074133	0.047355	0.069734	-0.070859	0.256815	0.439064	-0.029577	0.449746	0.37961	0.061533	0.500483
13338534	AT1G10717	3.16123	3.26228	2.88462	3.25008	3.32859	3.14937	3.09525	3.19417	3.45188	3.32986	3.30019	3.05714	3.73661	3.63039	3.49656	3.45024	3.3948	3.94801	3.18128	3.56654	3.52775	3.94807	3.49942	3.24328	0.575379	0.368113	0.611944	0.200163	0.066207	0.798636	-0.06598	-0.068109	0.567258	0.079776	-0.028396	-0.092232	-0.555328	-0.063854	0.031193	0.497829	0.104623	-0.704733	-0.489348	0.004255	-0.536065	0.418053	0.133019	-0.612501
13338537	AT1G10720	8.44673	8.30839	8.18761	8.25993	8.31078	8.15422	8.30248	8.29766	8.19574	8.0503	8.43063	8.26802	8.52468	8.62416	8.49559	8.42855	8.69372	8.40743	8.5127	8.61196	8.541	8.5234	8.54879	8.4672	0.077949	0.31577	0.307978	0.168617	0.382938	0.253213	-0.144258	-0.010739	0.008131	-0.209631	0.119845	0.113807	-0.011983	-0.012199	0.045413	0.094845	-0.144933	0.059775	0.132275	-0.00146	0.037282	0.304476	-0.264778	-0.054032
13338542	AT1G10730	9.05804	9.10314	9.48309	9.10047	9.09307	9.19284	9.19828	9.41101	9.56946	9.24318	9.39448	9.66351	9.52	9.6756	9.94405	9.81789	9.79418	9.6864	9.59895	9.72265	9.89295	9.71111	9.83274	9.82187	0.461957	0.572465	0.460961	0.717421	0.701118	0.493562	0.140241	0.307869	0.086371	0.142709	0.301418	0.470669	0.078948	0.047051	-0.051107	-0.106779	0.038554	0.135474	-0.061293	-0.260818	-0.137478	-0.249488	-0.262864	-0.335195
13338554	AT1G10745	3.49884	3.39212	3.58364	3.60413	3.16861	3.46926	3.92981	3.49292	3.42607	3.58364	4.19144	3.54942	3.58364	3.73203	3.64685	3.64906	3.52138	3.55177	4.34799	4.13996	3.59191	3.66096	3.40785	3.76588	0.084798	0.339905	0.063218	0.044928	0.352766	0.082509	0.430974	0.100795	-0.157561	-0.0205	1.02283	0.080156	0.764359	0.407936	-0.054947	0.011899	-0.113524	0.214108	0.333385	0.307141	0.102614	0.032399	-1.13635	0.133952
13338557	AT1G10747	4.24052	3.44405	3.55352	4.32694	3.62667	3.76024	3.80946	4.3693	3.95815	3.62234	4.45831	3.82482	4.054	3.56287	3.55556	3.74944	3.91522	3.76024	3.75566	4.41286	3.82928	3.70625	3.65571	3.76024	-0.186521	0.118822	0.002038	-0.577497	0.288554	0	-0.431059	0.925257	0.404625	-0.704594	0.831644	0.06458	-0.29834	0.849988	0.273714	-0.04319	-0.259509	0	0.132719	-0.075269	-0.130911	0.661404	-1.09115	-0.06458
13338561	AT1G10790	3.4081	3.81757	3.144	4.11907	3.17128	3.2794	3.73489	3.3936	3.6983	3.50057	3.34506	3.07381	4.00132	3.89695	3.54249	4.05201	3.60175	3.36151	4.02288	3.44318	3.74692	3.8798	3.53938	3.60721	0.593222	0.079374	0.398487	-0.067066	0.430474	0.082107	0.326796	-0.423973	0.554299	-0.618501	0.173785	-0.205596	0.021561	-0.453771	0.204435	-0.172206	-0.062374	0.245705	-0.305235	-0.029798	-0.349864	0.446295	-0.236159	0.451301
13338565	AT1G10810	5.40985	5.13509	4.88398	5.48538	5.08318	4.98401	5.32749	5.0186	5.12477	5.41781	5.37242	5.35893	5.60615	5.50313	5.60691	5.06729	5.64708	5.6506	5.35269	5.51357	5.60748	5.03294	5.39778	5.50606	0.196301	0.368045	0.722939	-0.418091	0.563896	0.666597	-0.082364	-0.116487	0.240792	-0.067572	0.289237	0.374925	-0.253467	0.010437	0.000565	-0.034342	-0.249299	-0.14454	-0.171103	0.126924	-0.240227	0.03323	-0.538536	-0.519465
13338573	AT1G10850	6.97995	7.52904	7.58277	8.05581	7.63187	7.88208	6.82506	7.48438	7.59194	7.97189	7.62884	6.71394	7.35719	7.9825	7.95556	8.13251	8.14693	8.00037	7.31156	7.52794	7.89829	7.90127	7.95707	7.90487	0.377239	0.453466	0.372797	0.076697	0.515061	0.118284	-0.154896	-0.044658	0.009174	-0.083923	-0.003031	-1.16814	-0.045634	-0.454561	-0.057278	-0.231234	-0.189859	-0.095493	0.109262	-0.409903	-0.066452	-0.147311	-0.186828	1.07264
13338578	AT1G10890	9.60759	9.79114	10.0128	9.98735	9.90167	9.51962	9.5355	9.81002	9.79659	9.97119	9.76026	9.68266	9.78823	9.94367	10.1751	10.2133	10.0084	9.83602	9.82157	9.87647	10.0487	10.1892	9.99575	9.84499	0.180642	0.152527	0.16228	0.225932	0.10677	0.316404	-0.072083	0.018879	-0.216243	-0.016157	-0.141412	0.163037	0.033342	-0.0672	-0.12638	-0.02405	-0.012694	0.008966	0.105425	-0.086079	0.089863	-0.007893	0.128718	-0.154071
13338586	AT1G10910	8.82015	9.0737	9.2175	8.95502	8.76937	8.65991	8.75001	9.02529	9.14453	8.97255	8.5989	7.98909	8.9236	9.13393	9.23216	9.09679	8.68601	8.69959	8.7638	9.19243	9.23948	9.06736	8.72158	8.50637	0.103453	0.060229	0.014659	0.141774	-0.08336	0.039677	-0.070137	-0.048406	-0.072969	0.017535	-0.170475	-0.67082	-0.159799	0.058502	0.007314	-0.029434	0.03557	-0.193218	-0.089662	0.106908	0.080283	-0.046969	0.206045	0.477602
13338598	AT1G10950	10.7321	10.6823	10.7726	10.8543	10.5386	10.5702	10.7281	10.6813	10.7933	10.9347	10.5763	10.6919	10.7619	10.7246	10.7699	10.7984	10.6177	10.6635	10.7469	10.7197	10.6538	10.8674	10.5684	10.6179	0.02982	0.04224	-0.00266	-0.05591	0.07906	0.09329	-0.00395	-0.00103	0.0207	0.0804	0.03769	0.12177	-0.01502	-0.00487	-0.1161	0.06905	-0.04924	-0.04553	-0.01107	-0.00384	-0.1368	-0.01135	-0.08693	-0.1673
13338612	AT1G10960	11.3614	11.5682	11.8245	11.3248	11.8375	11.626	11.4279	11.4888	11.7751	11.3797	11.7803	11.6825	11.5219	11.6273	11.6716	11.2835	11.8609	11.8157	11.5819	11.5564	11.6751	11.3292	11.8917	11.7	0.16042	0.05913	-0.15285	-0.04135	0.02341	0.1897	0.06648	-0.07937	-0.04941	0.05486	-0.05724	0.05655	0.06007	-0.07085	0.00345	0.04575	0.03082	-0.1157	-0.00641	0.00852	0.05286	-0.00911	0.08806	-0.17225
13338616	AT1G32620	7.23904	7.61597	7.65361	7.61795	7.64776	8.21388	6.4257	8.52865	6.78868	6.75766	7.27012	7.18639	7.0439	7.47996	7.13978	7.55618	6.79303	7.39092	7.83327	6.51674	6.85088	7.32085	7.52856	6.30463	-0.195131	-0.136011	-0.513821	-0.061764	-0.854723	-0.822958	-0.813331	0.912684	-0.864923	-0.860284	-0.377636	-1.02749	0.789365	-0.963215	-0.288907	-0.235331	0.73553	-1.08629	1.6027	-1.8759	0.576016	0.624953	1.11317	-0.058795
13338618	AT1G11020	8.73427	8.90191	8.65605	8.76786	8.65313	8.76921	8.83576	8.80691	8.62514	8.8271	8.7944	8.74977	9.05693	9.12263	8.94942	9.03021	8.98561	8.92001	8.9735	9.10302	8.95721	9.05789	9.11374	9.09042	0.322668	0.220719	0.293373	0.262354	0.332481	0.150802	0.101494	-0.094996	-0.030912	0.059241	0.141274	-0.019439	-0.083435	-0.019608	0.00779	0.027676	0.128134	0.170409	-0.184929	0.075388	0.038702	-0.031565	-0.01314	0.189848
13338624	AT1G11050	8.07135	7.7637	7.73821	7.87001	7.91145	7.72799	8.09397	7.90781	7.84758	8.36891	7.76053	7.87491	8.16329	7.95304	7.82636	7.55233	7.61318	7.62753	8.39834	8.10908	7.9046	8.4243	7.54976	7.91542	0.091939	0.189342	0.088145	-0.317687	-0.29827	-0.100453	0.022619	0.144113	0.109374	0.498895	-0.150919	0.146921	0.235049	0.156042	0.078247	0.871972	-0.063418	0.287891	0.21243	0.011929	-0.031127	0.373077	0.087501	0.14097
13338627	AT1G11060	8.13023	8.08896	8.17257	8.18098	8.08384	8.24245	8.16554	8.27209	8.2139	8.29926	8.2022	8.21663	8.23364	8.23448	8.17014	8.48635	8.17273	8.23929	8.22947	8.33653	8.11691	8.30887	8.26169	8.13899	0.10341	0.14552	-0.002428	0.305373	0.088897	-0.003161	0.035307	0.183131	0.041322	0.118281	0.11836	-0.025823	-0.004171	0.102045	-0.053235	-0.177482	0.088961	-0.100296	-0.039478	-0.081086	-0.094557	-0.295763	-0.029399	-0.074473
13338640	AT1G11090	8.62203	8.63066	8.34204	9.01778	8.66477	9.02155	8.63842	8.45223	8.43111	8.70007	8.71157	8.76273	8.02926	8.06614	7.78845	8.21638	8.44606	8.50194	8.04689	8.29144	8.45781	8.34309	8.37795	8.82599	-0.592767	-0.564526	-0.553585	-0.801401	-0.21871	-0.519607	0.016393	-0.178428	0.089077	-0.317708	0.046802	-0.258821	0.017632	0.225309	0.669356	0.126708	-0.068106	0.324049	0.001239	0.403737	0.580279	0.444416	-0.114908	0.58287
13338644	AT1G11110	2.80872	2.99394	3.01693	3.26088	3.43148	3.11588	3.12848	3.22098	3.10982	3.30274	2.99329	3.40748	3.17773	3.30161	3.42962	3.78737	3.57684	3.2414	3.37956	3.16031	3.56375	3.56949	3.41045	3.48473	0.369003	0.307672	0.412683	0.526485	0.145356	0.125518	0.319758	0.22704	0.092886	0.041854	-0.438186	0.291604	0.201838	-0.141303	0.13413	-0.217875	-0.166391	0.243336	-0.11792	-0.368343	0.041244	-0.259729	0.271795	-0.048268
13338652	AT1G11120	7.5757	7.91333	7.16881	7.91396	8.0088	6.98689	7.80781	7.21731	7.18224	8.03042	7.09994	5.90596	7.38937	7.47837	7.31379	7.7411	7.66512	7.18788	7.01958	6.95932	7.25549	7.5708	7.2279	7.15792	-0.186329	-0.434954	0.144978	-0.172861	-0.343684	0.200991	0.232107	-0.696021	0.013435	0.116459	-0.908868	-1.08094	-0.369789	-0.519058	-0.058293	-0.1703	-0.43722	-0.029962	-0.601896	0.176963	-0.071728	-0.286759	0.471648	1.05097
13338657	AT1G11125	4.48356	4.46102	4.13171	4.67978	4.55966	3.98122	4.37741	4.22811	4.13584	4.09262	4.36576	4.62325	4.9227	4.86085	4.32378	4.4649	5.01831	4.5746	5.1586	4.67879	4.82905	4.49314	4.78064	4.89666	0.439136	0.399826	0.192072	-0.214878	0.458656	0.593378	-0.106151	-0.232916	0.004134	-0.587159	-0.1939	0.642031	0.235894	-0.18206	0.505273	0.028241	-0.237672	0.322067	0.342045	0.050856	0.501139	0.6154	-0.043772	-0.319964
13338661	AT1G11130	7.40197	8.30372	8.63633	8.27844	8.30547	8.51417	7.73059	8.0395	8.47935	8.07898	8.04078	7.68776	7.36886	8.04706	8.32028	8.13611	8.07362	8.23564	7.17305	7.78985	8.21733	7.82778	7.92032	7.94505	-0.033104	-0.256655	-0.31605	-0.142332	-0.231851	-0.278532	0.32862	-0.264224	-0.156979	-0.199468	-0.264698	-0.826414	-0.195818	-0.257215	-0.102953	-0.308332	-0.153307	-0.290584	-0.524438	0.007009	0.054026	-0.108864	0.111391	0.53583
13338680	AT1G11160	4.5459	5.20555	5.93906	5.28787	5.42918	5.81854	5.1827	4.79669	5.41195	4.8721	4.90342	4.69664	5.3477	5.54993	5.53074	5.60788	5.37491	5.77362	4.90059	5.42196	5.97633	5.37537	5.4912	4.97494	0.801799	0.344384	-0.408315	0.320001	-0.054268	-0.044924	0.636797	-0.40886	-0.527108	-0.415773	-0.52576	-1.1219	-0.447113	-0.127974	0.445592	-0.232505	0.116294	-0.798677	-1.08391	0.280886	0.9727	0.183268	0.642054	0.323227
13338697	AT1G11170	6.44177	7.38577	6.97777	6.59479	5.60965	5.37543	6.93451	7.14948	7.08519	6.28185	5.52458	5.72205	6.44466	7.97084	7.59151	6.78806	5.94901	5.6435	6.63226	7.23065	7.26735	6.70225	5.71762	5.94707	0.00289	0.585062	0.613739	0.193263	0.339357	0.268076	0.492743	-0.236293	0.107413	-0.31294	-0.08507	0.346623	0.187608	-0.740188	-0.324165	-0.08581	-0.231384	0.303569	-0.305135	-0.503895	-0.431578	0.22713	-0.146314	-0.043054
13338716	AT1G11175	9.07613	8.86303	9.29112	9.91777	9.16518	9.10041	9.05975	9.31127	9.10306	9.58412	8.81417	9.10984	9.27206	9.34492	9.34483	10.1211	9.43061	9.01343	9.44834	9.42255	9.14305	10.2066	9.45259	9.14044	0.195928	0.481893	0.053707	0.203322	0.265432	-0.086981	-0.016383	0.448237	-0.188069	-0.333651	-0.35101	0.009426	0.176283	0.077629	-0.201782	0.08548	0.02198	0.12701	0.192666	-0.370608	-0.013713	0.419131	0.37299	0.117584
13338718	AT1G11180	8.64407	9.10413	8.87313	8.77556	8.84472	8.41499	8.73441	8.77602	8.77306	8.69621	8.66737	8.06967	8.89948	9.12602	8.94059	8.64073	8.91268	8.79265	9.01361	9.01894	8.82107	8.64271	8.89898	8.71306	0.255411	0.021886	0.067455	-0.134826	0.06796	0.377661	0.090334	-0.328114	-0.100075	-0.079345	-0.177348	-0.345321	0.114122	-0.107076	-0.119524	0.00198	-0.013701	-0.079592	0.023788	0.221038	-0.019449	0.081325	0.163647	0.265729
13338733	AT1G11185	4.62755	4.47679	4.18285	4.15256	4.64393	4.15193	4.5707	4.2463	4.59758	4.50414	4.31756	4.60702	5.88943	4.99079	4.73229	4.90574	4.46322	4.19116	5.77998	5.23878	4.12508	4.42783	5.67133	4.5056	1.26188	0.514002	0.549442	0.753183	-0.180705	0.039226	-0.05685	-0.230487	0.414729	0.351579	-0.326372	0.455088	-0.109448	0.247982	-0.607206	-0.477914	1.20811	0.314447	-0.052598	0.478469	-1.02194	-0.829493	1.53448	-0.140641
13338735	AT1G11200	8.26509	7.94228	8.02844	8.00294	7.84366	7.97658	8.32249	8.21624	7.9825	8.08177	7.97903	7.95644	7.75794	7.13543	7.51312	7.46258	7.31265	7.5504	8.03678	7.87979	7.52118	7.76027	7.33142	7.65347	-0.507152	-0.80685	-0.515318	-0.540352	-0.531015	-0.426177	0.057399	0.273957	-0.045939	0.078835	0.135369	-0.02014	0.278843	0.744355	0.008056	0.297685	0.018772	0.103069	0.221444	0.470398	0.053995	0.21885	-0.116597	0.123209
13338741	AT1G11250	3.45013	3.02056	3.33957	3.43118	3.08403	3.43716	3.22616	3.95043	2.98408	3.25303	3.25477	3.49351	3.29516	3.24362	3.37417	3.76235	3.52276	3.87695	3.92183	3.09141	2.89608	3.59592	3.28223	3.2542	-0.154967	0.223061	0.034595	0.331171	0.438729	0.439787	-0.223971	0.929865	-0.355494	-0.178147	0.170748	0.056351	0.626663	-0.152213	-0.478095	-0.166437	-0.240526	-0.622745	0.850634	-1.08208	-0.122601	0.01171	-0.411274	-0.679096
13338744	AT1G11260	10.5056	10.4271	10.1377	9.82275	9.98227	8.4122	10.7157	10.5958	10.091	9.82989	9.1679	8.48978	10.293	10.3716	10.4327	9.91765	9.70925	8.70712	10.335	10.4878	10.1738	10.0543	9.00349	8.08034	-0.21264	-0.05555	0.29491	0.094904	-0.273015	0.294923	0.2101	0.16872	-0.04676	0.007134	-0.814366	0.077581	0.04196	0.11627	-0.25887	0.136695	-0.705761	-0.626783	-0.16814	-0.05245	-0.21211	0.129561	0.108605	-0.704364
13338751	AT1G11300	5.66747	5.46178	5.26142	5.63158	6.0255	6.09441	5.80847	5.48486	5.98189	5.85775	5.94438	6.49548	6.95759	7.14357	7.52931	7.19373	7.59045	7.53459	7.24244	7.23691	7.54293	7.20272	7.77591	7.73246	1.29012	1.68179	2.2679	1.56215	1.56496	1.44018	0.141	0.023083	0.720475	0.226171	-0.081119	0.401071	0.284849	0.093345	0.013616	0.008995	0.185462	0.197868	0.143849	0.070262	-0.706859	-0.217176	0.266581	-0.203203
13338767	AT1G11320	6.11452	5.93736	5.7313	6.09529	5.83011	6.19216	6.16582	5.74823	6.15544	6.14544	6.18712	6.25389	6.25433	6.24832	6.39173	5.94972	6.52795	6.64084	6.40551	6.64661	6.23831	5.99202	6.6619	6.89533	0.139812	0.310953	0.660436	-0.145563	0.697837	0.448684	0.051303	-0.189133	0.424145	0.050154	0.357004	0.061732	0.151179	0.398295	-0.153423	0.042294	0.133949	0.254484	0.099876	0.587428	-0.577568	-0.00786	-0.223055	0.192752
13338773	AT1G11330	8.41455	7.92763	8.07558	8.5737	8.55152	8.49543	8.42547	8.26087	8.33049	8.54111	8.95138	9.15118	8.53583	8.47139	8.6444	8.87477	9.004	8.87632	8.69014	8.52069	8.66211	8.8477	8.91323	8.8465	0.121278	0.54376	0.568815	0.301069	0.452476	0.380886	0.010917	0.333247	0.25491	-0.032591	0.399861	0.655744	0.154309	0.049306	0.017708	-0.027075	-0.090769	-0.029818	0.143392	-0.283941	-0.237202	0.005516	-0.49063	-0.685562
13338784	AT1G11380	9.63436	9.48631	9.40605	9.71946	9.01071	8.26543	9.92746	9.40504	9.32615	9.5137	8.36475	7.45967	9.98537	9.8106	9.63412	10.0755	9.29947	8.3837	9.52697	9.71705	9.55719	9.87074	8.55389	8.21561	0.351012	0.324286	0.228069	0.35602	0.288756	0.118266	0.293102	-0.08127	-0.079903	-0.20576	-0.645965	-0.805757	-0.458405	-0.093542	-0.076934	-0.204741	-0.745575	-0.168085	-0.751507	-0.012272	0.002969	0.001019	-0.09961	0.637672
13338792	AT1G11400	8.91355	8.74084	8.60939	8.8577	8.77437	8.39689	8.97941	8.65531	8.69802	9.04954	8.61646	8.49073	9.03815	8.82446	8.69611	9.18061	8.77014	8.30256	9.05746	8.89457	8.78438	9.15784	8.75925	8.46964	0.124597	0.083622	0.086712	0.322915	-0.004231	-0.094326	0.065859	-0.085522	0.088623	0.191839	-0.157911	0.093842	0.019309	0.07011	0.088273	-0.02277	-0.010893	0.167078	-0.04655	0.155632	-0.00035	-0.214609	0.147018	0.073236
13338801	AT1G11410	8.49163	8.93394	9.23859	8.75543	9.82507	9.55861	8.48292	8.99151	8.82984	8.54669	9.5443	9.28152	8.11193	8.99131	9.21994	9.04154	9.50137	9.31032	8.37126	8.8055	8.94237	8.63557	9.18539	9.06268	-0.379691	0.05737	-0.018647	0.286114	-0.323706	-0.248282	-0.008702	0.057577	-0.408747	-0.20874	-0.280773	-0.277087	0.25933	-0.185812	-0.277573	-0.405973	-0.315977	-0.247649	0.268032	-0.243389	0.131174	-0.197233	-0.035204	0.029438
13338809	AT1G11430	10.8277	10.9347	10.9285	10.8011	10.8626	10.9898	10.7273	10.8959	11.0226	10.896	10.8436	10.6872	10.6677	10.8647	10.8428	10.7524	10.7074	10.8515	10.6301	10.817	10.9134	10.8022	10.7709	10.7722	-0.15994	-0.07005	-0.08569	-0.04873	-0.15522	-0.13832	-0.10038	-0.03887	0.09407	0.0949	-0.019	-0.30264	-0.03764	-0.04768	0.07056	0.04978	0.06354	-0.07927	0.06274	-0.00881	-0.02351	-0.04512	0.08254	0.22337
13338816	AT1G11440	8.43235	8.83717	9.03189	8.87261	9.39067	8.94089	8.39467	8.79096	9.01386	9.20725	9.48398	9.2193	9.09928	9.26324	9.31358	9.43746	9.36297	9.14393	8.86955	9.07879	9.07955	9.24522	9.06047	9.01886	0.666931	0.426068	0.281689	0.564854	-0.0277	0.203038	-0.03768	-0.046215	-0.018033	0.334637	0.093313	0.278407	-0.229737	-0.184449	-0.23403	-0.192241	-0.302499	-0.125067	-0.192057	-0.138234	-0.215997	-0.526878	-0.395812	-0.403474
13338820	AT1G11450	3.52934	3.48936	4.26965	4.07362	4.31967	3.84569	3.7961	3.68273	4.13517	3.87097	4.1564	3.72513	4.07688	4.43244	4.39771	4.37722	4.82488	4.22013	3.98033	4.24486	5.00057	5.11102	4.6262	4.5985	0.547538	0.943082	0.128054	0.303595	0.505214	0.374447	0.26676	0.193366	-0.134488	-0.202655	-0.163264	-0.12056	-0.096547	-0.187585	0.602864	0.733804	-0.198685	0.378369	-0.363307	-0.380951	0.737352	0.936459	-0.035421	0.498929
13338828	AT1G11460	3.00853	3.36474	3.67876	2.8003	3.53465	3.11659	2.4	3.65571	3.71976	3.12274	3.21958	2.95688	3.20925	3.08842	3.86841	4.13178	3.61715	2.83621	3.35059	3.64597	3.79809	3.64315	4.64083	3.4486	0.200721	-0.276313	0.18965	1.33148	0.082498	-0.280383	-0.608531	0.290978	0.041006	0.322432	-0.315073	-0.159709	0.141336	0.557545	-0.070317	-0.488638	1.02367	0.612389	0.749867	0.266567	-0.111323	-0.81107	1.33875	0.772098
13338835	AT1G11475	8.89955	9.21699	9.15999	8.69385	8.73142	8.9575	8.84851	9.00467	9.33393	8.71063	8.76331	8.88847	9.31411	9.37239	9.34444	9.13313	9.17479	9.60085	9.44133	9.72588	9.62713	9.30949	9.54311	9.83302	0.41456	0.155392	0.18445	0.439288	0.443376	0.643354	-0.051044	-0.212324	0.173943	0.016788	0.031899	-0.069022	0.127214	0.35349	0.282694	0.176358	0.368316	0.232175	0.178258	0.565814	0.108751	0.15957	0.336417	0.301197
13338841	AT1G11500	4.60975	4.16088	4.2079	4.30915	4.66877	4.1366	4.08485	4.44613	4.24642	3.95246	4.01544	3.48817	5.31913	4.73324	5.34822	5.03771	5.18627	4.9228	5.4674	5.55074	4.71735	4.9624	4.63358	4.70681	0.709375	0.572356	1.14032	0.728569	0.517495	0.786193	-0.524905	0.285247	0.038521	-0.356689	-0.653328	-0.648435	0.148273	0.817499	-0.630867	-0.075315	-0.552687	-0.215987	0.673178	0.532252	-0.669388	0.281374	0.100641	0.432448
13338845	AT1G11520	4.05299	3.5436	3.63635	3.64523	3.4987	3.29627	3.57137	3.82259	3.45509	3.3242	3.58357	3.82363	4.64588	4.07884	3.9461	3.6424	3.76542	3.84324	3.94843	4.0104	3.66734	3.95614	3.51574	4.34043	0.592891	0.535236	0.309747	-0.002829	0.266719	0.546977	-0.481627	0.278988	-0.181267	-0.321026	0.084872	0.527361	-0.697456	-0.068433	-0.278765	0.313744	-0.249675	0.49719	-0.215829	-0.347421	-0.097498	0.63477	-0.334547	-0.030171
13338847	AT1G11530	8.99448	9.10929	9.03242	8.88856	8.0652	7.85507	9.02792	9.08721	9.01499	8.92761	7.52662	7.34248	8.88304	8.92027	9.12406	8.87281	8.65487	8.58267	9.0701	9.23559	8.92613	9.03197	8.43721	8.52392	-0.111435	-0.189026	0.091638	-0.015746	0.589665	0.727597	0.03344	-0.022084	-0.017437	0.03905	-0.538581	-0.512587	0.187055	0.315319	-0.197931	0.159158	-0.217656	-0.058749	0.153615	0.337403	-0.180494	0.120108	0.320925	0.453838
13338853	AT1G50070	4.59265	4.61479	4.73686	4.31339	4.88589	4.56648	4.01872	4.95707	4.39369	4.1579	4.56313	4.22236	4.47247	4.76703	4.39829	4.85704	4.39071	4.85985	4.72354	4.52253	4.73496	4.15594	4.74998	4.41005	-0.120185	0.152239	-0.338563	0.543648	-0.495178	0.293375	-0.573932	0.342276	-0.343169	-0.155488	-0.322756	-0.344119	0.251069	-0.244498	0.336666	-0.701097	0.359268	-0.449805	0.825001	-0.586774	0.679835	-0.545609	0.682024	-0.105686
13338855	AT1G11560	4.43856	4.63866	4.97111	4.54629	4.9977	5.21672	4.47388	5.16231	4.42898	4.58395	4.48485	4.57016	4.50602	4.54525	4.86387	4.58322	4.65538	4.9715	5.02695	4.54525	4.69004	4.53494	4.81675	4.59767	0.067462	-0.093408	-0.107238	0.036929	-0.342319	-0.24522	0.035322	0.52365	-0.542131	0.037655	-0.512847	-0.646558	0.520926	0	-0.173832	-0.048283	0.161371	-0.373831	0.485604	-0.52365	0.368299	-0.085938	0.674218	0.272727
13338857	AT1G11570	3.49544	3.37245	3.46226	3.928	3.83055	3.38184	3.99989	3.81924	3.98001	3.57237	3.67392	3.23671	3.85714	3.43274	3.57405	3.83317	3.96685	3.77009	4.45162	3.71062	3.52121	3.38505	3.82162	4.11849	0.361701	0.060294	0.11179	-0.09483	0.136301	0.388251	0.504448	0.446795	0.517752	-0.355622	-0.15663	-0.145126	0.594476	0.277879	-0.052845	-0.448113	-0.145237	0.348402	0.090028	-0.168916	-0.570597	-0.092491	0.011393	0.493528
13338862	AT1G11572	3.47695	4.12091	4.01729	4.47603	4.26577	3.98154	3.75194	4.33923	3.91227	4.10187	3.98192	4.29807	3.82929	3.96425	3.89776	4.95332	4.02647	4.17401	4.40709	4.08659	3.61531	4.69963	4.34337	5.32612	0.352342	-0.156667	-0.119532	0.477286	-0.239293	0.192464	0.274989	0.218319	-0.105019	-0.374157	-0.283845	0.316523	0.577799	0.122345	-0.282446	-0.253682	0.316898	1.15212	0.30281	-0.095974	-0.177427	0.120475	0.600743	0.835593
13338866	AT1G11580	8.34867	7.47125	7.40202	8.21039	8.68686	8.8378	8.05116	7.453	7.54519	8.86986	9.22397	9.3548	8.23309	7.67828	7.43155	8.01306	9.06596	9.05466	8.14386	7.4908	7.53896	8.63563	8.89686	9.42172	-0.115577	0.207029	0.029534	-0.197332	0.379099	0.216861	-0.297513	-0.018244	0.143171	0.659464	0.53711	0.517002	-0.089232	-0.187477	0.107406	0.622572	-0.169102	0.367057	0.208281	-0.169233	-0.035765	-0.036892	-0.706212	-0.149945
13338872	AT1G11590	3.01494	3.0987	3.22417	2.89768	2.78551	2.59604	3.22828	3.60509	3.30669	3.19578	3.04282	2.94339	3.97904	4.60597	5.1849	5.04918	4.27993	4.30277	4.94825	4.92688	4.69164	4.09609	5.31822	4.41499	0.964095	1.50727	1.96072	2.15151	1.49442	1.70673	0.213334	0.50639	0.082515	0.298102	0.257312	0.347354	0.969213	0.320908	-0.493254	-0.953096	1.0383	0.112225	0.755879	-0.185482	-0.575769	-1.2512	0.780988	-0.235129
13338877	AT1G11593	3.09363	2.25827	2.45905	2.28253	2.50206	2.29497	2.5086	2.84041	2.64999	2.2483	2.50075	2.5086	2.2819	3.04588	2.07838	3.17134	2.72162	2.48627	2.95749	2.69184	2.57516	2.31609	2.93045	2.26587	-0.811737	0.787607	-0.380665	0.888815	0.219557	0.191303	-0.585034	0.582137	0.190942	-0.034229	-0.001311	0.213633	0.675593	-0.354031	0.496776	-0.855246	0.208831	-0.220402	1.26063	-0.936168	0.305834	-0.821017	0.210142	-0.434035
13338879	AT1G11600	3.41221	3.58646	3.80574	3.34535	3.43242	3.35489	3.0937	3.23517	3.34692	3.19324	3.21208	3.05999	3.78488	4.32744	3.76481	4.56391	4.22378	4.02415	3.81522	4.14579	4.49519	4.3196	4.28602	4.05641	0.372672	0.740976	-0.04093	1.21856	0.791353	0.669257	-0.318506	-0.35129	-0.458814	-0.152116	-0.220347	-0.294906	0.030348	-0.181648	0.730379	-0.244312	0.06224	0.032259	0.348854	0.169642	1.18919	-0.092196	0.282587	0.327165
13338883	AT1G11608	2.80745	2.81548	2.75355	2.98406	2.7695	2.92267	2.72609	3.2179	2.72615	3.12271	2.75633	3.31601	2.88445	2.62015	2.88445	2.86446	3.09067	3.14582	3.0797	2.73356	2.88445	2.91599	2.86816	2.88445	0.077003	-0.195325	0.130904	-0.1196	0.321168	0.223149	-0.081361	0.40242	-0.027402	0.138652	-0.013172	0.393332	0.19524	0.113407	0	0.051534	-0.222509	-0.261369	0.276601	-0.289013	0.027402	-0.087118	-0.209337	-0.654701
13338887	AT1G11620	2.52999	2.76593	2.4403	2.99214	2.8848	2.70919	2.94044	3.22592	2.82063	2.75205	2.9439	2.70321	3.15966	2.52605	2.47969	2.68256	2.76265	2.68544	2.73467	2.92352	2.74808	2.56784	3.20552	3.04798	0.629669	-0.239879	0.03939	-0.309578	-0.122147	-0.023756	0.410449	0.459998	0.380335	-0.240088	0.059103	-0.005982	-0.424989	0.397475	0.268396	-0.114723	0.442871	0.362542	-0.835438	-0.062523	-0.111939	0.125365	0.383768	0.368524
13338889	AT1G11650	10.433	10.3767	10.4237	10.6577	10.4428	10.4017	10.4727	10.4543	10.487	10.726	10.5738	10.4359	10.615	10.5364	10.5617	10.769	10.5706	10.5819	10.6009	10.5739	10.5834	10.8248	10.5646	10.6309	0.18197	0.15971	0.13808	0.1113	0.12773	0.1802	0.03963	0.07768	0.06331	0.0683	0.13096	0.03415	-0.01413	0.03748	0.02166	0.05585	-0.00601	0.049	-0.05376	-0.0402	-0.04165	-0.01245	-0.13697	0.01485
13338898	AT1G11655	4.42373	4.5984	4.46709	4.77062	4.32171	4.0165	4.54415	4.36158	4.44922	4.54957	4.62052	3.95234	5.08881	4.94038	4.69499	4.72436	4.61836	4.80047	4.63761	4.72831	4.86048	4.57585	4.23258	4.93722	0.665076	0.341984	0.227909	-0.046259	0.296649	0.783972	0.120418	-0.236816	-0.017863	-0.221053	0.298815	-0.064163	-0.4512	-0.212071	0.165485	-0.148513	-0.385771	0.136749	-0.571618	0.024745	0.183348	0.07254	-0.684586	0.200912
13338902	AT1G11660	9.63304	9.62555	9.74524	9.78228	9.59806	9.70776	9.71223	9.63683	9.83231	9.89898	9.70373	9.75349	9.78514	9.80389	9.68455	9.76441	9.63566	9.80448	9.66171	9.75141	9.65987	9.74972	9.59554	9.70177	0.152108	0.178348	-0.06069	-0.017873	0.037592	0.096724	0.07919	0.011289	0.087069	0.116697	0.105662	0.045732	-0.123436	-0.052483	-0.024681	-0.014682	-0.040111	-0.102707	-0.202626	-0.063772	-0.11175	-0.131379	-0.145773	-0.148439
13338915	AT1G11680	9.52378	9.50424	9.53196	9.70707	9.70897	9.63765	9.51246	9.4239	9.38754	9.59322	9.6841	9.51389	9.34397	9.39325	9.26701	9.49682	9.44065	9.49597	9.13817	9.29243	8.98239	9.45916	9.31185	9.30398	-0.17981	-0.110984	-0.264946	-0.210251	-0.268324	-0.141672	-0.011316	-0.080335	-0.144417	-0.113847	-0.02487	-0.123758	-0.205794	-0.100821	-0.284618	-0.037652	-0.128791	-0.191997	-0.194478	-0.020486	-0.140201	0.076195	-0.103921	-0.068239
13338920	AT1G11690	3.50523	3.33358	3.73765	3.64598	3.63262	3.51828	3.15498	3.74185	3.35868	3.09544	3.5264	3.19662	3.62675	3.56321	3.73309	4.02991	3.27348	3.40527	3.75016	3.91159	3.49079	3.62889	3.77763	3.2035	0.12152	0.229632	-0.004557	0.383934	-0.359137	-0.113009	-0.350253	0.408266	-0.378965	-0.550538	-0.106224	-0.321665	0.123409	0.348378	-0.242294	-0.40102	0.504144	-0.201777	0.473662	-0.059888	0.136671	0.149518	0.610368	0.119888
13338922	AT1G11700	5.46657	5.41445	5.90808	6.74248	6.77344	7.16327	5.64151	5.14041	5.8411	6.63758	6.69514	6.80144	5.90259	6.84608	6.50131	7.37517	7.31755	7.40455	5.81567	6.43405	6.44591	6.95401	6.66479	6.38314	0.436018	1.43164	0.59324	0.632685	0.54411	0.241275	0.174932	-0.274031	-0.066975	-0.104905	-0.078296	-0.361838	-0.086924	-0.412029	-0.055406	-0.421164	-0.652759	-1.02141	-0.261856	-0.137998	0.011569	-0.316259	-0.574463	-0.659571
13338926	AT1G11710	5.58874	5.44762	5.33048	5.52657	5.2076	5.49957	5.52535	5.93267	5.33248	5.34565	5.54978	5.22223	4.97655	5.02502	5.05811	5.25513	4.88082	5.28445	4.97395	4.97574	5.31146	4.7209	4.6296	5.1262	-0.61219	-0.422606	-0.272375	-0.271437	-0.326787	-0.215125	-0.063392	0.485042	0.001994	-0.180916	0.342174	-0.277344	-0.002602	-0.049272	0.253349	-0.534226	-0.251212	-0.158248	0.06079	-0.534314	0.251355	-0.35331	-0.593386	0.119096
13338930	AT1G11720	8.78769	8.62302	8.81334	9.02067	9.81993	9.85668	8.78824	8.74129	8.49804	9.19776	9.89932	10.0811	8.95361	8.70733	8.55689	8.72006	9.66179	9.74768	8.56377	8.34031	8.29287	8.73957	9.55908	9.64293	0.165919	0.08431	-0.25645	-0.30061	-0.158141	-0.108997	0.000554	0.118268	-0.315303	0.177088	0.079386	0.224464	-0.389832	-0.367024	-0.264024	0.019513	-0.102714	-0.104745	-0.390386	-0.485292	0.051279	-0.157575	-0.1821	-0.329209
13338949	AT1G11730	5.5301	5.28016	5.46847	5.33737	5.56551	5.45211	5.42613	5.09783	5.297	5.18124	5.33629	5.35907	5.45913	5.45913	6.0644	6.12652	6.07722	5.74874	5.22289	5.34315	5.8566	6.0248	6.07079	5.60357	-0.070974	0.178974	0.595925	0.789154	0.511712	0.296629	-0.103976	-0.182323	-0.171474	-0.156129	-0.229219	-0.093034	-0.236241	-0.115983	-0.207802	-0.101724	-0.006433	-0.145167	-0.132265	0.06634	-0.036328	0.054405	0.222786	-0.052133
13338961	AT1G11750	10.5555	10.6911	10.4833	10.4549	10.5545	10.6949	10.5543	10.5737	10.6083	10.5195	10.5345	10.5056	10.6892	10.6559	10.5597	10.423	10.5837	10.757	10.7254	10.6324	10.6107	10.5574	10.6657	10.6426	0.13371	-0.03523	0.07638	-0.03191	0.0292	0.06215	-0.00119	-0.11744	0.12493	0.06462	-0.01997	-0.18922	0.03612	-0.02354	0.05097	0.13444	0.08202	-0.1144	0.03731	0.0939	-0.07396	0.06982	0.10199	0.07482
13338974	AT1G11765	2.16136	2.34762	2.22884	2.65234	2.28118	2.06231	2.34873	2.19566	2.43781	2.18328	2.14482	2.30468	2.43872	2.30468	2.36691	2.47394	2.47734	2.32384	2.3327	2.43591	2.56909	2.19326	2.67916	2.23598	0.277367	-0.042943	0.138062	-0.178402	0.196155	0.261531	0.187375	-0.151966	0.208966	-0.46906	-0.136364	0.242371	-0.106022	0.131225	0.202181	-0.280672	0.201821	-0.087858	-0.293397	0.283191	-0.006785	0.188388	0.338185	-0.330229
13338978	AT1G11770	3.03737	3.12962	3.28457	3.44482	3.47923	3.09887	3.50719	3.12677	3.04412	3.11184	3.02637	3.23823	3.45493	4.10824	3.21459	3.26791	3.10319	3.30855	3.42463	3.51645	3.66158	3.26502	3.23109	3.40322	0.417563	0.978619	-0.069974	-0.176907	-0.376036	0.209678	0.469815	-0.002847	-0.240443	-0.332977	-0.452858	0.139363	-0.030304	-0.591788	0.446991	-0.002896	0.127896	0.094675	-0.500119	-0.588941	0.687434	0.330081	0.580754	-0.044688
13338981	AT1G11790	8.89442	8.69558	8.98101	8.96684	8.97765	9.38077	8.84303	8.56683	9.03982	8.89765	9.27518	9.44896	9.1126	8.91346	9.13402	8.74569	8.61889	9.02525	8.88941	8.76966	9.22008	8.7805	8.79302	8.94288	0.218174	0.21788	0.153003	-0.221156	-0.358759	-0.355519	-0.051397	-0.128753	0.058801	-0.06919	0.297528	0.068193	-0.223193	-0.143799	0.086063	0.034813	0.174123	-0.082368	-0.171796	-0.015046	0.027262	0.104003	-0.123405	-0.150561
13338997	AT1G11810	3.41709	3.56147	3.6719	3.72463	3.56147	4.0186	3.28105	3.44631	3.49674	3.45139	3.34604	3.90069	3.38273	3.82388	3.89886	3.22374	3.60689	3.59254	3.69439	3.9871	3.56147	3.30274	3.82911	3.9836	-0.034361	0.262406	0.226959	-0.500887	0.045421	-0.426068	-0.136037	-0.115163	-0.175166	-0.273234	-0.215427	-0.117915	0.311662	0.163222	-0.33739	0.078997	0.222218	0.391066	0.447699	0.278385	-0.162224	0.352231	0.437645	0.508981
13339000	AT1G11840	10.7049	10.6086	10.6835	10.5865	10.9395	11.2718	10.6312	10.4423	10.6465	10.5424	11.261	11.3606	10.495	10.5604	10.4854	10.3628	10.9695	11.1493	10.4572	10.5631	10.5492	10.5335	11.1389	11.4313	-0.20988	-0.04826	-0.19809	-0.22371	0.03	-0.12253	-0.0737	-0.16629	-0.03699	-0.0441	0.32148	0.08879	-0.0378	0.00271	0.06387	0.17076	0.16935	0.28197	0.0359	0.169	0.10086	0.21486	-0.15213	0.19318
13339015	AT1G11850	8.06307	8.12126	7.90107	8.29742	8.42031	8.41674	7.94711	7.97864	7.64157	8.33308	8.02801	7.63729	6.37581	5.90922	6.70753	6.54857	6.06445	6.76254	6.13647	6.33706	5.63075	6.36582	6.72851	6.24153	-1.68726	-2.21204	-1.19354	-1.74884	-2.35586	-1.6542	-0.115959	-0.14262	-0.259497	0.035661	-0.392295	-0.779452	-0.239339	0.427836	-1.07678	-0.182753	0.66406	-0.521015	-0.12338	0.570456	-0.817284	-0.218414	1.05635	0.258437
13339019	AT1G11860	10.6369	10.5398	10.8112	10.7349	10.973	10.9133	10.6081	10.5424	11.0074	10.8303	10.9066	10.6953	10.6375	10.5524	10.8041	10.6969	10.824	10.6186	10.5354	10.4323	10.7252	10.6392	10.765	10.5404	0.00056	0.01252	-0.00708	-0.03804	-0.14903	-0.29468	-0.02878	0.00255	0.1962	0.09535	-0.06639	-0.21801	-0.10207	-0.12007	-0.07893	-0.05766	-0.05893	-0.07824	-0.07329	-0.12262	-0.27513	-0.15301	0.00746	0.13977
13339027	AT1G11870	8.66202	8.82107	8.83478	9.08355	8.70278	8.89781	8.70571	8.8188	8.93221	8.93965	8.78755	8.55749	8.72086	8.78391	8.63706	8.5282	8.75842	8.64861	8.68896	8.53208	8.85351	8.65668	8.56831	8.63398	0.058849	-0.037161	-0.197725	-0.555349	0.055646	-0.249202	0.043696	-0.002267	0.097433	-0.143903	0.084778	-0.340317	-0.031906	-0.251821	0.216451	0.128477	-0.190115	-0.014629	-0.075602	-0.249554	0.119018	0.27238	-0.274893	0.325688
13339041	AT1G11890	10.3131	10.3043	10.2124	10.2799	10.3573	10.5146	10.3043	10.1488	10.283	10.2023	10.4224	10.7142	10.7926	10.5758	10.6731	10.5667	10.6149	10.7902	10.7397	10.6289	10.4306	10.5172	10.7453	10.9102	0.47947	0.27144	0.46077	0.2868	0.25764	0.27551	-0.00882	-0.15553	0.07067	-0.07765	0.06509	0.19953	-0.05292	0.05314	-0.24255	-0.04956	0.13039	0.12005	-0.0441	0.20867	-0.31322	0.02809	0.0653	-0.07948
13339050	AT1G11905	8.07872	7.68269	7.74486	8.3267	7.57012	7.70282	8.21984	7.69705	8.00662	8.31205	8.0333	8.32256	8.34822	8.21358	8.10422	8.62466	8.14657	8.25297	8.66541	8.42311	8.19651	8.88463	8.35829	8.41233	0.269499	0.530887	0.359353	0.297958	0.576448	0.550152	0.141121	0.014354	0.261752	-0.014649	0.463176	0.619739	0.31719	0.209531	0.092293	0.259969	0.211716	0.159357	0.176069	0.195177	-0.169459	0.274618	-0.25146	-0.460382
13339057	AT1G11915	4.5044	4.25853	4.622	4.5229	4.2438	4.12347	4.44121	5.02842	4.73221	3.93116	4.42791	4.09297	4.21796	4.77994	4.42873	4.61416	4.67469	4.46328	4.43484	4.00176	4.99925	4.8743	4.50705	4.18155	-0.286438	0.521407	-0.193261	0.091253	0.430885	0.339813	-0.063185	0.769888	0.110211	-0.59174	0.184105	-0.030498	0.216882	-0.778177	0.570513	0.260147	-0.167636	-0.281729	0.280067	-1.54807	0.460302	0.851887	-0.351741	-0.251231
13339062	AT1G11930	10.5745	10.4159	10.5386	10.5189	10.6022	10.6282	10.5249	10.4755	10.4564	10.6948	10.6441	10.7551	10.2848	10.4927	10.3978	10.4923	10.4727	10.6035	10.3892	10.4132	10.3803	10.468	10.606	10.5567	-0.28964	0.07679	-0.14079	-0.02658	-0.12948	-0.02472	-0.04954	0.05955	-0.0822	0.17595	0.04189	0.12696	0.10434	-0.07954	-0.01754	-0.02432	0.13332	-0.04677	0.15388	-0.13909	0.06466	-0.20027	0.09143	-0.17373
13339073	AT1G11970	2.88648	2.87506	2.63529	3.18298	2.99194	3.15635	2.97952	2.75284	2.59912	2.74718	2.684	2.75699	3.37247	3.02365	2.82982	3.05252	3.01877	3.55273	3.11819	3.38633	2.99446	3.2066	2.97952	2.86056	0.485992	0.148593	0.194533	-0.13046	0.026834	0.396379	0.093037	-0.122215	-0.03616	-0.435801	-0.307936	-0.399356	-0.254281	0.362683	0.164641	0.154077	-0.039253	-0.69217	-0.347318	0.484898	0.200801	0.589878	0.268683	-0.292814
13339075	AT1G11980	4.66243	5.12531	4.92363	4.75768	4.88206	5.25192	4.34364	5.61229	4.53929	4.56397	3.75149	5.65356	3.89254	4.39671	4.80259	4.60026	5.10698	4.30166	5.24382	4.52746	4.51541	3.41356	4.44686	4.33915	-0.769891	-0.728602	-0.121034	-0.157419	0.224915	-0.950261	-0.318789	0.48698	-0.38434	-0.19371	-1.13057	0.401637	1.35128	0.130754	-0.28718	-1.1867	-0.660119	0.037495	1.67007	-0.356226	0.09716	-0.992992	0.470448	-0.364142
13339077	AT1G12010	7.23459	7.75873	7.94744	8.16277	7.63824	6.93842	7.48712	7.77873	7.06705	7.84293	6.93244	5.83033	4.284	3.87702	4.78593	3.9235	4.28411	3.9958	4.28905	4.05913	3.61783	4.4119	4.40916	3.38434	-2.9506	-3.88171	-3.16151	-4.23927	-3.35413	-2.94262	0.252529	0.020003	-0.880383	-0.319838	-0.705795	-1.10809	0.00505	0.182113	-1.1681	0.488407	0.125054	-0.611464	-0.247479	0.16211	-0.287715	0.808245	0.830849	0.496624
13339084	AJ505682	5.18425	4.76676	5.44167	5.99315	4.691	5.40239	5.22039	5.35127	5.22952	4.7555	4.61226	4.07165	6.86189	7.16722	7.00418	7.00983	6.81845	6.87092	6.59801	6.81839	6.80289	6.86843	6.84361	6.98535	1.67764	2.40047	1.56251	1.01667	2.12746	1.46853	0.036136	0.584517	-0.212153	-1.23766	-0.078735	-1.33075	-0.26388	-0.348839	-0.201296	-0.141391	0.02516	0.114435	-0.300016	-0.933356	0.010857	1.09627	0.103895	1.44518
13339086	AT1G12015	5.25024	4.31414	5.35044	4.84094	4.79919	5.05262	5.03406	4.70326	5.71303	5.07651	5.19934	4.60639	5.64466	6.29732	6.05748	5.84461	5.88038	5.55974	5.62141	5.93026	5.38673	5.78449	5.80397	5.94084	0.394426	1.98318	0.707049	1.00367	1.08119	0.507124	-0.216177	0.389114	0.362596	0.235569	0.400154	-0.446223	-0.023254	-0.367062	-0.67075	-0.060117	-0.076413	0.381098	0.192923	-0.756176	-1.03335	-0.295686	-0.476567	0.827321
13339088	AT1G12040	3.36092	3.74666	3.70227	3.80477	3.82287	4.6418	3.75175	4.47701	3.38635	3.45328	3.43308	3.51021	3.68073	4.28635	3.70631	3.72864	3.36531	3.70708	4.48683	3.28023	3.33013	3.9016	3.3253	3.79109	0.319807	0.539689	0.004036	-0.076128	-0.45756	-0.934727	0.390833	0.730358	-0.315921	-0.351486	-0.389787	-1.1316	0.806104	-1.00612	-0.376184	0.172956	-0.040007	0.084015	0.415271	-1.73648	-0.060263	0.524442	0.34978	1.21561
13339092	AT1G12050	9.64693	9.94645	9.74678	9.58034	9.91852	10.0505	9.88227	10.1	9.73906	9.61104	9.95311	10.0814	9.61291	10.0312	9.78201	9.52985	9.81118	9.86702	9.74098	10.1706	9.95703	9.67569	9.80614	10.0468	-0.034017	0.084754	0.035231	-0.050492	-0.107341	-0.183495	0.235346	0.153564	-0.007718	0.0307	0.034593	0.03089	0.128067	0.13939	0.175023	0.145845	-0.005042	0.179765	-0.107279	-0.014174	0.182741	0.115145	-0.039635	0.148875
13339109	AT1G12060	8.56508	8.55701	8.53959	7.92158	8.28	8.70991	8.84858	8.70846	8.45781	7.77784	8.23724	7.99895	8.44727	8.05126	7.86465	7.64855	7.70485	8.05664	8.17947	8.22208	8.20653	7.55815	7.49171	7.77481	-0.117806	-0.505749	-0.674939	-0.273025	-0.575149	-0.653272	0.283502	0.151455	-0.081781	-0.143738	-0.042759	-0.710963	-0.267799	0.170826	0.341883	-0.090409	-0.213144	-0.281833	-0.551301	0.019371	0.423664	0.053329	-0.170385	0.42913
13339111	AT1G12080	8.94069	8.63818	9.06922	9.03276	8.55837	7.88451	8.97444	8.21426	8.89718	8.53508	8.27596	6.90431	8.92848	9.29765	9.51841	9.14395	8.82821	7.58514	8.79402	8.85696	9.26503	9.24419	8.45699	7.0838	-0.012217	0.659464	0.449196	0.111183	0.269843	-0.299378	0.033752	-0.423922	-0.172033	-0.497683	-0.282404	-0.980206	-0.134458	-0.440687	-0.25338	0.100244	-0.371218	-0.501339	-0.16821	-0.016765	-0.081347	0.597927	-0.088814	0.478867
13339117	AT1G12100	6.815	6.16226	5.76585	5.2062	6.20414	5.03933	6.13866	5.22886	6.05152	5.40523	5.14456	3.72138	6.96474	7.26695	6.50769	6.75734	6.68511	6.30193	6.94794	6.57472	6.17182	6.16151	6.55646	5.96731	0.149737	1.10468	0.741839	1.55114	0.480971	1.2626	-0.67634	-0.933401	0.28567	0.199024	-1.05958	-1.31796	-0.016798	-0.692225	-0.33587	-0.59583	-0.128659	-0.334623	0.659542	0.241176	-0.62154	-0.794854	0.930925	0.983333
13339119	AT1G12110	10.1626	9.14762	9.66692	10.4965	9.74968	9.65963	9.77808	9.11819	9.67044	10.6599	9.75161	9.95706	10.1601	9.29429	9.36786	10.2701	9.50486	9.52075	9.66696	8.99066	9.27767	10.3222	9.69063	9.73575	-0.00246	0.146672	-0.299066	-0.22648	-0.244821	-0.138879	-0.384507	-0.029438	0.003517	0.16333	0.00193	0.297424	-0.493174	-0.303634	-0.090188	0.05209	0.185777	0.214999	-0.108667	-0.274196	-0.093705	-0.11124	0.183847	-0.082425
13339127	AT1G12130	3.07826	2.97272	3.33717	3.15542	3.1893	3.141	3.04502	3.11036	3.14412	3.62084	3.04911	3.29195	3.92533	2.93259	3.14192	3.92977	3.118	3.58198	3.37158	3.54527	3.86565	3.71794	3.45767	3.94476	0.84707	-0.040127	-0.195245	0.774354	-0.071303	0.440977	-0.033236	0.13764	-0.193046	0.465423	-0.140191	0.150952	-0.553752	0.612677	0.72373	-0.211828	0.339674	0.362781	-0.520516	0.475037	0.916776	-0.677251	0.479865	0.211829
13339133	AT1G12140	7.98286	7.97881	7.92775	8.07541	8.21359	8.18187	7.98713	7.91725	7.87111	7.932	8.20697	8.49267	8.19346	7.97655	8.22932	8.1316	8.32814	8.45167	8.3473	8.16232	8.13576	8.13958	8.49197	8.65214	0.210601	-0.002264	0.301568	0.056188	0.114548	0.269805	0.00427	-0.06157	-0.056638	-0.143411	-0.006616	0.310802	0.153841	0.185767	-0.093557	0.007978	0.163834	0.200472	0.149571	0.247337	-0.036919	0.151389	0.17045	-0.11033
13339141	AT1G12160	5.68392	5.35626	4.92681	5.49426	5.02097	4.93771	5.3997	4.96913	5.07671	5.29736	5.342	5.36	4.67421	4.51266	4.48314	4.56408	4.91832	4.42644	4.90983	4.54505	4.98929	4.86077	4.57484	4.72431	-1.00971	-0.843599	-0.443666	-0.930173	-0.102651	-0.511269	-0.28422	-0.387128	0.149897	-0.196893	0.32103	0.422297	0.235625	0.032386	0.506146	0.296689	-0.343479	0.297868	0.519845	0.419514	0.356249	0.493582	-0.664509	-0.124429
13339148	AT1G12180	3.32327	3.33032	3.38572	3.61203	3.78751	3.53587	3.39534	3.82402	3.48424	3.41677	3.54022	3.62681	3.55625	3.54638	3.48969	3.59492	3.52141	3.44671	3.51494	3.45323	3.75383	3.69195	3.51217	3.54022	0.232976	0.216058	0.103976	-0.017102	-0.266105	-0.08916	0.072071	0.493695	0.098523	-0.195261	-0.247291	0.090938	-0.041312	-0.093156	0.26414	0.097022	-0.009238	0.093508	-0.113383	-0.586851	0.165617	0.292283	0.238053	0.00257
13339153	AT1G12200	7.20872	6.89741	7.62731	8.54622	7.64083	8.27813	7.17674	7.34754	7.72642	8.4112	7.78092	8.38172	8.51227	8.03921	8.37309	8.8483	8.34991	8.54057	8.89927	8.40522	8.9773	9.04475	8.56522	8.52303	1.30355	1.1418	0.74578	0.302082	0.709082	0.262441	-0.031978	0.450133	0.099103	-0.135024	0.140095	0.103596	0.387002	0.366008	0.604209	0.196448	0.215307	-0.017542	0.41898	-0.084125	0.505106	0.331472	0.075212	-0.121138
13339163	AT1G12210	8.41335	8.47999	9.16138	8.72285	8.71135	9.03403	8.0725	8.83482	9.50355	9.11461	9.19483	9.35479	9.15034	9.47586	9.64235	9.53139	9.61746	9.66092	9.42305	9.66695	9.9583	9.70973	9.65447	9.6575	0.736986	0.995869	0.480977	0.808545	0.906102	0.626888	-0.340849	0.354824	0.342171	0.391763	0.483472	0.32076	0.27271	0.191092	0.315944	0.178337	0.037013	-0.003424	0.613559	-0.163732	-0.026227	-0.213426	-0.446459	-0.324184
13339165	AT1G12220	6.45418	6.3735	6.44745	6.41728	6.53917	6.24944	6.5825	6.09823	6.48248	6.39138	6.59048	6.01466	5.9415	6.16776	6.19678	6.12411	6.1662	5.8712	6.15571	6.30653	6.00508	6.18447	6.14082	5.92772	-0.512681	-0.20574	-0.250676	-0.293173	-0.37297	-0.378233	0.128318	-0.275264	0.035026	-0.025905	0.051309	-0.234779	0.214208	0.138772	-0.191695	0.060356	-0.02538	0.056518	0.08589	0.414036	-0.226721	0.086261	-0.076689	0.291297
13339171	AT1G12230	9.56723	9.98092	9.92876	9.80351	9.5854	9.32313	9.6866	9.94229	9.92385	9.62811	9.53663	9.1008	9.56782	9.76494	9.71866	9.44008	9.38676	9.18197	9.37897	9.64747	9.7795	9.3615	9.24825	8.96016	0.000593	-0.215981	-0.210099	-0.363427	-0.198642	-0.141158	0.119372	-0.038639	-0.004905	-0.175398	-0.048775	-0.22233	-0.188846	-0.117478	0.060841	-0.078588	-0.138508	-0.221817	-0.308218	-0.078839	0.065746	0.09681	-0.089733	0.000513
13339187	AT1G12240	9.2826	9.77215	10.1311	9.69397	10.3619	10.1062	9.52158	9.37177	9.98555	9.97091	10.7366	10.7824	9.58318	9.84152	9.71005	9.80932	10.1724	10.0566	9.61003	9.6562	9.73936	9.92198	10.1646	10.2271	0.300585	0.069374	-0.421049	0.115345	-0.18944	-0.04965	0.238986	-0.400376	-0.145553	0.276938	0.3747	0.67616	0.026846	-0.185318	0.029308	0.112657	-0.00777	0.17053	-0.21214	0.215058	0.174861	-0.164281	-0.38247	-0.50563
13339195	AT1G12244	8.03459	8.14958	8.53394	8.0302	8.52487	8.54664	7.93554	8.04253	8.19941	8.02288	8.31007	7.87945	8.08258	8.11249	8.25201	8.15148	8.4895	8.49418	7.88989	7.89893	8.10892	7.9269	8.3211	8.2875	0.047986	-0.037086	-0.281923	0.121284	-0.035365	-0.052456	-0.099051	-0.107053	-0.334527	-0.007315	-0.214797	-0.667186	-0.192686	-0.213566	-0.143089	-0.224578	-0.168408	-0.206684	-0.093635	-0.106513	0.191438	-0.217263	0.046389	0.460502
13339203	AT1G12250	9.89175	10.0038	10.1921	9.86357	10.209	9.94664	9.94832	9.96145	10.2667	9.67351	10.0124	9.50847	10.05	10.0167	10.2203	9.85349	10.3238	10.2744	10.0851	10.0943	10.1959	9.89142	10.1833	10.0154	0.158201	0.01296	0.02814	-0.010081	0.11478	0.32771	0.056567	-0.042312	0.0746	-0.190059	-0.19663	-0.438171	0.03516	0.07754	-0.0244	0.037933	-0.14048	-0.25891	-0.021407	0.119852	-0.099	0.227992	0.05615	0.179261
13339213	AT1G12270	9.93049	9.87624	9.90209	9.78669	9.68065	9.6493	9.90785	9.80189	9.78497	9.7967	9.72158	9.63179	9.82704	9.95575	9.83122	9.69274	9.66019	9.73787	9.74895	9.89874	9.92845	9.68672	9.77771	9.83924	-0.10345	0.079512	-0.070879	-0.093955	-0.02046	0.088572	-0.022649	-0.074349	-0.117125	0.010004	0.040923	-0.017513	-0.078096	-0.057009	0.09724	-0.006021	0.117516	0.101369	-0.055447	0.01734	0.214365	-0.016025	0.076593	0.118882
13339222	AT1G12320	5.72347	5.09436	4.78287	4.67146	5.18533	4.6664	5.67652	5.1656	5.04637	5.20453	4.94969	5.20462	5.12409	4.4515	4.57944	4.80715	4.56263	5.28395	5.7481	5.30289	5.11742	5.02567	5.68397	5.54431	-0.599385	-0.642858	-0.20344	0.135684	-0.622701	0.617546	-0.046956	0.071247	0.263499	0.533069	-0.235638	0.538219	0.624005	0.851388	0.537986	0.218526	1.12134	0.260364	0.670961	0.780141	0.274487	-0.314543	1.35698	-0.277855
13339227	AT1G12330	7.82138	7.89406	8.19989	8.24776	7.97984	8.23447	7.45182	7.74646	7.83502	8.19776	7.96142	7.18923	7.35356	7.55439	7.78195	8.19388	7.93408	7.93065	7.43743	7.67432	7.90046	8.20882	8.0233	7.4377	-0.467819	-0.339669	-0.417944	-0.053877	-0.04576	-0.303818	-0.369567	-0.147597	-0.364874	-0.050001	-0.018422	-1.04524	0.083866	0.119932	0.118504	0.014942	0.089222	-0.492958	0.453433	0.267529	0.483378	0.064943	0.107644	0.552286
13339232	AT1G12340	5.03303	4.64766	5.53698	3.81601	5.32291	5.09406	4.93607	5.35052	5.07295	5.48598	5.19728	4.77807	5.4909	5.88999	6.27689	6.3199	5.9059	5.80179	5.45441	5.91808	5.81969	5.52079	5.87171	5.47593	0.457876	1.24233	0.739918	2.5039	0.582999	0.707728	-0.096954	0.702866	-0.464031	1.66997	-0.12562	-0.315984	-0.03649	0.028094	-0.457205	-0.799112	-0.034195	-0.325854	0.060464	-0.674772	0.006826	-2.46909	0.091425	-0.00987
13339238	AT1G12350	9.04071	9.14502	8.97326	9.33009	9.23047	9.27704	9.11759	9.22665	8.91619	9.24263	9.09599	9.09953	9.26759	9.13719	9.22581	9.64802	9.44046	9.41226	9.28719	9.31956	9.2737	9.51503	9.27515	9.37929	0.226879	-0.007823	0.252554	0.317931	0.209987	0.135223	0.076884	0.08164	-0.057066	-0.087458	-0.134476	-0.177513	0.019599	0.182364	0.047886	-0.132992	-0.165307	-0.032973	-0.057285	0.100724	0.104952	-0.045534	-0.030831	0.14454
13339247	AT1G12360	9.35585	9.22254	9.13594	9.37155	9.2855	9.07293	9.3503	9.31006	9.13851	9.4862	9.31662	9.40736	9.58585	9.44848	9.45578	9.81501	9.56423	9.48495	9.7081	9.43438	9.40697	9.75942	9.56315	9.58119	0.230004	0.225941	0.319842	0.443458	0.278725	0.41202	-0.005548	0.087527	0.002575	0.114647	0.031116	0.334433	0.122248	-0.014095	-0.048809	-0.055591	-0.001078	0.096248	0.127796	-0.101622	-0.051384	-0.170238	-0.032194	-0.238185
13339270	AT1G12390	6.31235	5.93703	6.26601	6.61546	5.873	5.7347	6.18877	6.28805	5.86498	6.39505	6.07014	6.11384	6.58538	6.68889	6.31235	6.90092	6.63638	6.69535	6.78379	6.62539	6.72967	7.04096	6.56173	6.75766	0.273034	0.751858	0.046344	0.285458	0.763377	0.960652	-0.123576	0.351025	-0.401024	-0.22041	0.197135	0.379142	0.198403	-0.063499	0.417318	0.140042	-0.074646	0.062315	0.321979	-0.414524	0.818342	0.360452	-0.271781	-0.316827
13339276	AT1G12400	6.77361	6.54937	6.7286	6.89886	6.73769	6.94984	6.92571	6.40261	6.99799	6.55878	6.80211	6.83098	6.59515	6.53969	6.73356	6.50076	6.81242	7.08614	6.73907	6.90327	7.22717	6.88722	7.04666	7.24744	-0.178457	-0.009689	0.004966	-0.398095	0.074729	0.1363	0.152101	-0.146763	0.269394	-0.340074	0.064419	-0.118867	0.143925	0.363588	0.493601	0.38646	0.234237	0.161299	-0.008176	0.510351	0.224207	0.726534	0.169818	0.280166
13339281	AT1G12410	10.9675	11.032	10.9175	10.8458	10.9819	11.044	10.9604	10.9349	11.0017	10.921	10.9316	10.7952	11.0392	10.9226	10.9045	10.8958	10.9809	11.1363	11.0358	10.9976	10.9309	10.9343	11.0462	11.1629	0.07174	-0.10942	-0.01294	0.05005	-0.00096	0.09232	-0.00713	-0.09711	0.08421	0.07528	-0.05026	-0.24878	-0.00346	0.07494	0.02643	0.03849	0.06521	0.02656	0.00367	0.17205	-0.05778	-0.03679	0.11547	0.27534
13339293	AT1G12450	8.76537	8.53343	8.52395	8.94426	8.23437	7.9083	8.69796	8.43537	8.19289	8.62265	7.96304	7.72547	8.60333	8.83933	8.51617	8.8119	8.26685	7.82653	8.27918	8.37649	8.33178	8.60693	8.03574	7.72629	-0.162035	0.3059	-0.007782	-0.13236	0.032482	-0.081771	-0.067407	-0.098059	-0.331062	-0.321607	-0.27133	-0.182834	-0.324155	-0.462838	-0.184386	-0.204971	-0.231108	-0.100244	-0.256748	-0.364779	0.146676	0.116636	0.040222	0.08259
13339300	AT1G12460	6.36397	7.19488	7.19786	7.15794	6.9676	6.77219	6.40464	6.92305	7.11964	7.12454	6.87091	6.20913	6.42613	7.26761	7.27199	7.42317	7.20725	6.81136	6.60015	7.1414	7.07509	7.08582	6.93343	6.49078	0.062154	0.072726	0.074135	0.26523	0.23965	0.039167	0.040665	-0.271835	-0.078221	-0.033407	-0.096695	-0.563065	0.174027	-0.126214	-0.196906	-0.337357	-0.273822	-0.320582	0.133362	0.145621	-0.118685	-0.30395	-0.177127	0.242483
13339305	AT1G12470	9.64116	9.71313	9.51909	9.28643	9.54215	9.44502	9.75511	9.68642	9.53676	9.33466	9.61205	9.59258	10.0082	9.92972	9.68223	9.44218	9.69823	9.57343	9.83636	9.69293	9.67024	9.46735	9.69117	9.73495	0.366998	0.216592	0.163142	0.155746	0.156083	0.128409	0.113949	-0.026712	0.017674	0.048227	0.069907	0.147562	-0.171803	-0.236795	-0.011985	0.025175	-0.007057	0.161524	-0.285752	-0.210083	-0.029659	-0.023052	-0.076964	0.013962
13339329	AT1G12490	3.73452	3.88899	3.38975	3.54464	3.30748	3.36902	3.33422	3.62911	3.4148	3.78194	3.35866	3.38389	3.13133	3.68073	3.34769	2.94154	3.05539	3.16094	3.32203	3.07487	3.3147	3.2226	3.18074	3.44395	-0.603191	-0.208261	-0.042053	-0.603098	-0.252086	-0.208076	-0.400296	-0.259889	0.025057	0.237302	0.051182	0.014876	0.190698	-0.605866	-0.032997	0.281063	0.125349	0.283013	0.590994	-0.345977	-0.058054	0.043761	0.074167	0.268137
13339332	AT1G12540	2.93731	3.51774	2.63351	3.66391	3.24394	3.00636	2.97441	3.09652	2.94889	2.82038	2.76197	3.44523	2.8662	3.25543	3.11821	3.17177	2.98133	2.77791	3.14296	3.06565	3.13535	2.8923	3.12867	3.02411	-0.071113	-0.26231	0.4847	-0.492134	-0.26261	-0.22845	0.037097	-0.421224	0.315385	-0.843526	-0.481971	0.438876	0.276755	-0.189779	0.017146	-0.279477	0.147335	0.246199	0.239658	0.231445	-0.298239	0.564049	0.629306	-0.192677
13339337	AT1G12550	6.8634	6.639	6.54539	7.00084	7.00714	7.26319	6.53641	6.66087	7.02251	6.77813	7.08294	7.04018	7.26567	7.32105	7.32986	7.10151	7.57745	7.89458	7.58789	7.36696	7.51296	7.18107	7.68864	7.64062	0.40227	0.682051	0.784475	0.100667	0.570309	0.631395	-0.326988	0.021869	0.477117	-0.222713	0.075804	-0.223012	0.322227	0.045914	0.183095	0.079561	0.111192	-0.253961	0.649215	0.024045	-0.294022	0.302274	0.035388	-0.030949
13339342	AT1G12560	3.67531	3.64702	3.3642	3.74193	3.39579	3.49341	3.57986	3.78897	3.2576	3.57253	3.42858	3.37103	3.85887	3.86153	3.6854	3.8637	3.57501	3.45496	3.88705	3.56341	3.67442	3.80309	3.4516	3.6149	0.183561	0.214509	0.321198	0.121767	0.179218	-0.038449	-0.095447	0.141949	-0.106593	-0.169407	0.03279	-0.122379	0.028175	-0.298123	-0.010975	-0.060609	-0.12341	0.159942	0.123622	-0.440072	0.095618	0.108798	-0.1562	0.282321
13339347	AT1G12580	9.61474	9.32841	9.21535	9.93355	9.53114	9.48436	9.51476	9.2447	9.11074	9.96124	9.4293	9.34937	9.60059	9.3773	9.4533	9.9302	9.57532	9.51369	9.60582	9.3359	9.28517	9.96412	9.4796	9.49945	-0.014156	0.048895	0.237941	-0.003355	0.044177	0.029336	-0.099984	-0.083713	-0.10461	0.027692	-0.101843	-0.134988	0.005229	-0.041407	-0.168122	0.033923	-0.095718	-0.014243	0.105213	0.042306	-0.063512	0.006231	0.006125	0.120745
13339355	AT1G12630	3.34752	3.55693	3.36961	3.58933	3.21216	3.30709	4.1116	3.39248	3.12793	3.53275	3.33627	3.39917	4.66263	3.63871	3.87549	3.88105	4.00499	3.86697	3.53985	3.49145	3.51642	3.42056	3.28628	3.48561	1.31511	0.081774	0.50588	0.291724	0.792827	0.559877	0.764077	-0.164455	-0.241679	-0.05658	0.124111	0.09208	-1.12279	-0.147253	-0.359064	-0.460488	-0.718708	-0.381355	-1.88687	0.017202	-0.117385	-0.403908	-0.842819	-0.473435
13339357	AT1G12650	10.069	9.77693	9.797	9.95823	9.68863	9.78308	9.84319	9.86299	9.87274	10.0494	9.6882	9.78497	9.50812	9.36371	9.12588	9.28227	9.21667	9.40479	9.28672	9.26119	9.28025	9.47384	9.43202	9.36533	-0.560916	-0.413218	-0.671123	-0.675953	-0.471969	-0.378286	-0.22585	0.086057	0.075745	0.091154	-0.000429	0.001887	-0.221408	-0.102522	0.15437	0.191567	0.215359	-0.039467	0.004442	-0.188579	0.078625	0.100413	0.215788	-0.041354
13339372	AT1G12660	3.38422	3.81838	3.60077	4.05806	3.66506	3.78092	3.73466	4.10348	3.66073	3.63022	4.19824	3.89828	3.97388	3.74116	3.84637	3.8894	3.91104	3.5839	3.74651	3.62012	4.21805	3.77447	3.51556	3.77218	0.589652	-0.077217	0.245599	-0.168658	0.245975	-0.197024	0.350433	0.285099	0.059952	-0.427835	0.533173	0.117355	-0.22737	-0.121041	0.371676	-0.114928	-0.39548	0.188283	-0.577803	-0.40614	0.311724	0.312907	-0.928653	0.070928
13339375	AT1G12663	2.8858	3.36502	3.02487	3.65992	3.58084	3.33082	2.81673	2.68784	2.69304	2.86571	3.15592	2.74031	3.74254	3.37257	2.72491	3.11444	3.30907	2.91444	3.06257	3.40219	3.12508	3.36842	2.98782	2.94996	0.856737	0.007552	-0.299959	-0.545479	-0.271769	-0.416381	-0.069072	-0.677184	-0.331834	-0.794213	-0.424922	-0.590511	-0.679968	0.029618	0.400171	0.253972	-0.321252	0.035519	-0.610896	0.706802	0.732005	1.04818	0.10367	0.62603
13339378	AT1G12665	3.46988	3.82198	3.72329	3.55009	3.61883	4.42087	3.29056	3.41768	3.328	3.58972	3.47319	3.39094	3.81282	3.13029	3.90719	4.27745	3.8647	3.45385	3.55816	3.68065	4.07375	3.25881	3.80608	3.62421	0.342939	-0.691694	0.183903	0.727364	0.245866	-0.967018	-0.179316	-0.404304	-0.39529	0.039637	-0.145642	-1.02993	-0.254655	0.550361	0.166562	-1.01864	-0.058616	0.170357	-0.075339	0.954665	0.561852	-1.05828	0.087026	1.20029
13339381	AT1G12672	3.38922	3.79407	3.3741	3.57195	3.73817	3.8206	3.82636	3.31764	3.32545	3.237	3.77028	3.62	3.62452	4.09538	3.39489	3.46697	3.7935	4.10466	3.26548	3.42245	4.23081	3.51722	3.69196	4.03484	0.235297	0.301318	0.020795	-0.10498	0.055325	0.284058	0.437143	-0.476431	-0.048649	-0.334951	0.032105	-0.200599	-0.359035	-0.672934	0.835912	0.050248	-0.101537	-0.069819	-0.796178	-0.196503	0.884561	0.385199	-0.133642	0.13078
13339390	AT1G12730	7.8202	8.64865	8.4955	7.65408	7.37993	7.04964	8.21878	8.7573	8.23709	7.39751	6.95045	6.76382	6.73939	7.13782	7.2934	6.89832	6.60289	6.06355	6.34278	7.02618	7.38348	6.93237	6.29441	6.5407	-1.08081	-1.51083	-1.2021	-0.755763	-0.777046	-0.986095	0.398575	0.108653	-0.258418	-0.256571	-0.429485	-0.285821	-0.396616	-0.111642	0.090081	0.034053	-0.308482	0.477147	-0.795191	-0.220295	0.348499	0.290624	0.121003	0.762968
13339407	AT1G12740	2.7696	3.19182	3.00465	2.83885	2.79671	2.99924	2.78855	2.75358	3.02131	2.68292	2.78518	3.07004	3.01916	3.21113	2.92309	3.05222	3.03508	2.9285	3.06309	3.12836	3.02738	3.0505	3.03736	2.83182	0.249557	0.019302	-0.081562	0.213368	0.238362	-0.070739	0.018943	-0.438241	0.01666	-0.155935	-0.011529	0.070801	0.043933	-0.082761	0.104297	-0.00172	0.002281	-0.096683	0.02499	0.35548	0.087637	0.154215	0.01381	-0.167484
13339419	AT1G12760	9.54551	9.47641	9.36548	9.09436	9.43013	9.3523	9.50333	9.50917	9.43332	9.10979	9.38237	9.39037	9.9279	10.0006	9.86093	9.55823	9.69786	9.61611	10.1069	10.0109	9.8683	9.56892	9.62532	9.59023	0.382392	0.524194	0.495452	0.463873	0.26773	0.263817	-0.042183	0.032766	0.067843	0.015436	-0.04776	0.038069	0.179029	0.0103	0.00737	0.010687	-0.072536	-0.02588	0.221212	-0.022466	-0.060473	-0.004749	-0.024776	-0.063949
13339429	AT1G12770	5.60644	6.02079	6.33674	6.12425	6.03189	5.98626	5.81446	6.13051	6.32786	6.12798	5.77615	5.65074	5.28634	6.19654	6.12448	6.00443	5.7735	6.0615	5.82308	6.39472	6.02871	5.87308	5.76629	5.84375	-0.320096	0.175749	-0.212254	-0.11982	-0.258387	0.075243	0.208025	0.109714	-0.008876	0.00373	-0.255739	-0.33552	0.536734	0.198179	-0.09577	-0.131346	-0.007213	-0.217753	0.328709	0.088465	-0.086894	-0.135076	0.248526	0.117767
13339434	AT1G12775	7.11822	7.40139	7.21099	6.6717	7.20195	7.23481	7.45785	7.26493	7.34592	7.26299	6.71366	6.58374	7.46348	6.79637	7.17726	6.84569	7.36145	7.00233	6.93498	7.4956	7.49207	7.05197	7.15404	7.37869	0.345253	-0.60502	-0.03373	0.173985	0.159501	-0.232481	0.339628	-0.136463	0.134929	0.591285	-0.488288	-0.651067	-0.528496	0.699226	0.314804	0.20628	-0.207411	0.37636	-0.868124	0.835689	0.179875	-0.385005	0.280877	1.02743
13339437	AT1G12805	3.59739	3.59847	4.17917	3.89119	3.63078	4.26358	3.82355	4.1534	3.52971	3.90477	3.81065	3.65343	4.10671	3.94592	3.29197	3.8198	3.92005	3.47723	3.48595	3.9927	3.7167	3.51805	3.65726	3.81595	0.509324	0.347455	-0.887191	-0.071389	0.28927	-0.786357	0.226162	0.554936	-0.649458	0.01358	0.17987	-0.610154	-0.620763	0.046779	0.424726	-0.301748	-0.262785	0.338727	-0.846925	-0.508157	1.07418	-0.315328	-0.442655	0.948881
13339441	AT1G12810	7.30539	7.2246	7.3173	7.35218	7.0503	6.81578	7.31747	7.39292	7.28177	7.35108	7.02394	7.02732	7.17023	7.36533	7.49649	7.47231	7.35188	7.40407	7.55357	7.49219	7.53881	7.66748	7.31006	7.3564	-0.13516	0.140731	0.17919	0.12013	0.301581	0.588282	0.012077	0.168313	-0.035529	-0.001105	-0.026356	0.211536	0.383346	0.126859	0.042315	0.195165	-0.041816	-0.04767	0.371269	-0.041454	0.077844	0.19627	-0.01546	-0.259206
13339447	AT1G12840	10.3321	10.3978	10.297	10.3272	10.3101	10.5734	10.2078	10.3064	10.347	10.3059	10.4268	10.5731	10.6284	10.5308	10.5878	10.5708	10.6528	10.8801	10.7108	10.7397	10.6194	10.7645	10.7107	10.9594	0.29632	0.13296	0.29081	0.24358	0.34272	0.30665	-0.1243	-0.09139	0.04997	-0.02128	0.11672	-0.00032	0.08233	0.20891	0.03152	0.19376	0.05792	0.07935	0.20663	0.3003	-0.01845	0.21504	-0.0588	0.07967
13339461	AT1G12855	3.78797	3.79849	3.61292	3.44631	3.83762	3.11779	3.324	3.43597	3.33611	3.45427	3.45088	3.29319	3.54693	4.02198	3.26551	3.46156	3.46023	3.70475	3.11115	3.56036	3.75447	3.31371	3.76593	3.4461	-0.241038	0.223481	-0.347414	0.015249	-0.377388	0.586959	-0.46397	-0.362522	-0.276812	0.00796	-0.386738	0.175407	-0.435783	-0.461615	0.48896	-0.147852	0.305705	-0.258643	0.028187	-0.099093	0.765772	-0.155812	0.692443	-0.43405
13339463	AT1G12860	8.7693	8.71292	8.85744	8.73113	8.83535	8.90293	8.65048	8.73258	8.48274	8.66253	8.54374	7.7132	8.10149	8.37181	8.25684	8.30916	7.92863	8.18996	7.99259	8.0132	8.28033	7.83843	7.86494	7.64911	-0.667814	-0.341109	-0.600599	-0.421971	-0.906728	-0.712973	-0.118821	0.019655	-0.374701	-0.068608	-0.291611	-1.18973	-0.108901	-0.35861	0.023491	-0.470734	-0.063686	-0.540848	0.00992	-0.378265	0.398192	-0.402126	0.227925	0.648887
13339470	AT1G12880	8.08386	7.13398	7.02051	7.01281	8.20246	8.46677	7.94492	7.28027	6.66743	6.78247	8.17231	8.28499	6.96052	6.66703	6.04766	6.29485	7.55656	7.71345	7.00591	6.94438	6.51083	5.59481	7.61801	7.48621	-1.12335	-0.466947	-0.972849	-0.717962	-0.645902	-0.753329	-0.138947	0.146298	-0.353082	-0.230347	-0.030148	-0.181786	0.045395	0.277352	0.463171	-0.700041	0.061455	-0.227234	0.184342	0.131054	0.816253	-0.469694	0.091603	-0.045448
13339477	AT1G12890	4.36081	3.38503	2.93475	3.03169	3.33345	3.42972	3.35196	3.78184	3.16732	3.7088	3.52449	3.68613	3.63317	3.15125	3.49693	3.40725	3.59803	3.86379	3.49204	3.06468	3.32368	3.42717	3.37527	3.50788	-0.727648	-0.233781	0.562185	0.375563	0.264578	0.434063	-1.00885	0.396808	0.232574	0.677118	0.191031	0.256405	-0.141129	-0.08657	-0.173255	0.019924	-0.222768	-0.355902	0.867723	-0.483378	-0.405829	-0.657194	-0.413799	-0.612307
13339479	AT1G12938	3.01636	3.08307	2.89246	3.01603	3.06989	2.74161	3.01636	2.96826	2.79135	3.11296	2.97155	2.60225	3.04176	3.31853	3.02371	3.13697	3.12533	3.24576	2.82503	3.15361	3.15626	2.83898	2.8257	3.12891	0.025394	0.23546	0.131247	0.120939	0.055444	0.504142	0	-0.114807	-0.10111	0.096936	-0.098335	-0.139365	-0.216722	-0.16492	0.132554	-0.29799	-0.299627	-0.116843	-0.216722	-0.050113	0.233664	-0.394926	-0.201292	0.022522
13339481	AT1G12940	4.75683	4.46164	3.76031	4.9694	4.58073	4.1019	4.9863	4.25262	4.92447	5.26967	4.85849	4.18198	5.77819	6.10798	4.87371	6.23254	5.89617	5.31806	5.94374	6.17034	5.81836	6.49706	5.89007	5.59313	1.02136	1.64634	1.11339	1.26315	1.31544	1.21616	0.229465	-0.209018	1.16415	0.30027	0.277754	0.080084	0.165549	0.06236	0.944651	0.264515	-0.006101	0.275075	-0.063916	0.271378	-0.219501	-0.035755	-0.283855	0.194991
13339486	AT1G12950	4.59738	4.52792	4.44806	4.47234	4.56674	4.22062	3.97936	4.27025	3.86497	4.44806	4.64077	4.05819	4.62608	4.52258	3.60524	4.18813	4.51469	4.50552	4.44806	4.70067	4.12531	3.75017	4.34703	4.00871	0.028703	-0.005342	-0.842822	-0.284212	-0.052049	0.284905	-0.618015	-0.257667	-0.583091	-0.024276	0.074036	-0.162426	-0.178017	0.178091	0.520065	-0.437962	-0.167655	-0.496809	0.439998	0.435758	1.10316	-0.413686	-0.241691	-0.334383
13339496	AT1G12970	7.08765	7.28679	7.0488	6.98252	7.05708	6.75762	7.35623	7.45015	7.35989	6.92832	7.05797	7.29589	7.11603	7.50394	7.13771	7.1856	6.96264	7.12322	7.2524	7.27901	7.4551	6.93547	7.16493	7.07063	0.02838	0.217152	0.088912	0.20308	-0.094445	0.365601	0.268578	0.163362	0.311086	-0.054201	0.000881	0.538268	0.136369	-0.224924	0.317385	-0.250133	0.202287	-0.052594	-0.132209	-0.388286	0.006299	-0.195932	0.201406	-0.590862
13339502	AT1G12980	3.60103	3.63915	3.34683	3.44042	3.43961	3.20845	3.60533	3.61144	3.41985	3.25522	3.54955	3.3512	3.90003	3.80387	3.50111	3.55284	3.50111	3.64233	3.57011	3.54835	3.53886	3.73157	3.65154	3.43819	0.299	0.164724	0.154286	0.112423	0.061508	0.433886	0.004306	-0.027704	0.073024	-0.1852	0.109939	0.142749	-0.329914	-0.255519	0.037746	0.178733	0.150427	-0.204137	-0.33422	-0.227815	-0.035278	0.363933	0.040488	-0.346886
13339506	AT1G12990	10.7532	11.0781	10.9068	10.9153	10.834	10.9917	10.8528	10.8625	10.9387	10.8809	11.02	11.3558	10.9494	11.1414	11.2975	11.0648	11.1854	11.2726	11.02	11.1957	11.1159	11.2097	11.3167	11.4538	0.19615	0.06329	0.39065	0.14948	0.35135	0.28084	0.09958	-0.21554	0.03187	-0.03447	0.186	0.36407	0.07063	0.05428	-0.18155	0.14494	0.1313	0.18123	-0.02895	0.26982	-0.21342	0.17941	-0.0547	-0.18284
13339511	AT2G24390	5.04701	5.32702	5.51336	5.33796	5.40819	6.01177	5.10425	5.55116	4.92825	5.59915	6.03515	6.15626	3.95925	4.6487	4.43175	4.61347	4.487	4.60943	4.12538	4.29241	3.9081	4.23274	4.82624	4.62516	-1.08777	-0.678316	-1.08161	-0.724496	-0.921187	-1.40234	0.057237	0.224137	-0.585108	0.261186	0.626958	0.144497	0.166136	-0.356293	-0.523647	-0.380725	0.33924	0.015739	0.108899	-0.58043	0.061461	-0.641911	-0.287718	-0.128758
13339513	AT1G13040	7.9495	8.42553	8.40906	7.87993	7.34661	7.45309	8.04657	8.55547	8.45085	7.83504	7.93436	7.50097	7.79247	8.34404	8.42605	7.63736	7.45845	7.40576	7.76321	8.14302	8.06421	7.51786	7.53453	7.33092	-0.157029	-0.081491	0.016984	-0.24257	0.111839	-0.047335	0.09707	0.129938	0.041784	-0.044882	0.587751	0.047873	-0.029254	-0.201022	-0.361837	-0.119491	0.076074	-0.074836	-0.126324	-0.33096	-0.403621	-0.074609	-0.511677	-0.122709
13339515	AT1G13050	5.8904	6.61561	6.71854	6.21849	6.32293	5.39408	6.16728	6.98137	6.73884	6.19944	6.10792	5.83896	6.09182	6.43872	6.58675	6.3497	6.02235	5.75581	5.9484	6.49974	6.76825	5.99885	6.29266	5.99763	0.201419	-0.176896	-0.131789	0.131204	-0.300581	0.361726	0.276875	0.365757	0.020296	-0.019053	-0.215017	0.444873	-0.143425	0.061024	0.1815	-0.350851	0.270311	0.241819	-0.4203	-0.304733	0.161204	-0.331798	0.485328	-0.203054
13339521	AT1G13060	8.84645	8.74617	8.63665	8.75636	8.35558	8.75176	8.66835	8.70906	8.68758	8.51909	8.56115	8.74573	8.80498	8.8655	8.87798	8.74957	8.81719	9.11425	9.05728	9.03164	8.87013	8.93923	9.06656	9.15065	-0.041479	0.119323	0.241333	-0.006785	0.461604	0.362492	-0.178103	-0.037115	0.050935	-0.237268	0.205567	-0.00603	0.252305	0.166147	-0.00785	0.189658	0.249369	0.036403	0.430408	0.203262	-0.058785	0.426926	0.043802	0.042433
13339532	AT1G13080	8.17216	7.62111	7.05802	7.40428	9.42194	9.2268	8.30568	7.64396	7.43489	7.19823	9.51092	9.05	8.45622	8.41685	8.14413	8.1496	9.78078	9.45325	9.02424	8.50543	8.05237	8.03009	9.66772	9.03818	0.284057	0.795742	1.08611	0.745321	0.35884	0.226452	0.133522	0.022853	0.376877	-0.206049	0.088977	-0.176797	0.568025	0.088574	-0.091751	-0.119507	-0.113062	-0.415069	0.434503	0.065721	-0.468628	0.086542	-0.202039	-0.238272
13339539	AT1G13090	7.60796	8.14007	8.25992	7.71054	8.18008	8.48671	7.67857	7.67821	8.50211	7.79956	8.2776	8.48527	7.3929	8.03988	8.18407	7.91046	8.17042	8.21004	7.77173	8.11918	8.25532	8.07036	8.25685	8.53092	-0.215061	-0.100199	-0.07585	0.199911	-0.009658	-0.276675	0.070607	-0.461859	0.242182	0.089013	0.097528	-0.001444	0.378833	0.079307	0.071248	0.1599	0.086433	0.320878	0.308226	0.541166	-0.170934	0.070887	-0.011095	0.322322
13339543	AT1G13100	7.82914	7.10178	7.39494	7.6392	7.78579	7.22106	7.87401	7.37963	7.09363	7.68265	7.52144	6.98456	7.90838	7.49156	7.28379	7.57938	7.73012	7.37285	7.82988	7.25745	7.20963	7.61357	7.55726	7.33798	0.079243	0.389782	-0.111143	-0.059826	-0.055676	0.151793	0.04487	0.277855	-0.301312	0.04345	-0.26435	-0.236493	-0.078495	-0.234112	-0.074164	0.034189	-0.172859	-0.034873	-0.123365	-0.511967	0.227148	-0.009261	0.091491	0.20162
13339546	AT1G13110	11.2867	10.9395	10.8091	11.11	11.087	10.7623	11.3483	11.1584	11.1153	11.3748	11.0017	10.5733	11.4313	11.0233	11.0202	11.2656	11.0315	10.7399	11.4771	11.2664	10.9823	11.386	10.988	10.5868	0.14458	0.08384	0.21117	0.15562	-0.05551	-0.02244	0.06157	0.21893	0.3062	0.26476	-0.0853	-0.18905	0.0458	0.24308	-0.03798	0.12035	-0.04349	-0.15312	-0.01577	0.02415	-0.34418	-0.14441	0.04181	0.03593
13339550	AT1G13130	4.30882	4.12578	4.20904	4.5304	5.06277	4.79245	4.19832	4.21002	4.21208	4.51621	5.22026	4.43944	4.26848	4.04239	4.28113	4.50634	5.08056	4.69933	4.61238	4.25133	4.17375	4.36933	4.31089	4.88755	-0.040337	-0.083391	0.07209	-0.02406	0.017784	-0.093122	-0.110496	0.084238	0.003035	-0.014193	0.157491	-0.353006	0.343894	0.20894	-0.107385	-0.137011	-0.769665	0.188221	0.45439	0.124702	-0.11042	-0.122818	-0.927156	0.541227
13339556	AT1G13160	9.67512	9.72963	9.77929	9.55646	9.45115	9.58102	9.59305	9.78688	9.78099	9.63882	9.4705	9.41477	9.73973	9.71919	9.70974	9.45021	9.37812	9.61618	9.56804	9.6287	9.68523	9.21234	9.29916	9.6745	0.064601	-0.010438	-0.069552	-0.106252	-0.073035	0.035162	-0.082079	0.05725	0.001695	0.082365	0.019343	-0.166247	-0.171685	-0.090488	-0.024515	-0.23787	-0.078956	0.058325	-0.089606	-0.147738	-0.02621	-0.320235	-0.098299	0.224572
13339573	AT1G13180	9.07145	8.80065	8.77934	8.72038	8.38968	8.45982	8.91884	8.79053	8.60455	8.64035	8.6407	8.73432	9.05576	8.91366	8.82365	8.93431	8.57455	8.76324	9.20834	8.84148	8.91665	8.9455	8.72669	8.91552	-0.015689	0.113009	0.044313	0.213934	0.184865	0.303424	-0.152612	-0.01012	-0.174793	-0.080023	0.251017	0.274506	0.152576	-0.072172	0.092992	0.011189	0.152142	0.152274	0.305188	-0.062052	0.267785	0.091212	-0.098875	-0.122232
13339585	AT1G13190	10.055	9.94121	9.93959	10.08	10.0365	9.84899	10.0657	9.95347	10.039	10.1588	10.0631	10.0896	10.0205	10.0797	9.99888	10.1051	10.0334	9.97173	10.1125	10.0641	9.86816	10.1652	10.1077	9.99347	-0.03453	0.138513	0.059295	0.02504	-0.0031	0.122745	0.0107	0.012263	0.099431	0.0788	0.0266	0.240621	0.09201	-0.01566	-0.130724	0.06012	0.07432	0.021737	0.08131	-0.027923	-0.230155	-0.01868	0.04772	-0.218884
13339589	AT1G13220	8.54963	8.5006	8.52534	8.02639	8.61858	8.34948	8.58493	8.44795	8.46797	7.87474	8.28619	8.09239	8.67689	8.5846	8.42879	8.27783	8.4792	8.4925	8.53568	8.45661	8.3778	8.01358	8.47345	8.24483	0.127266	0.084001	-0.096546	0.251446	-0.139382	0.14302	0.035301	-0.052657	-0.05737	-0.151645	-0.332391	-0.25709	-0.141213	-0.127989	-0.050991	-0.264255	-0.005753	-0.247668	-0.176514	-0.075332	0.006379	-0.11261	0.326638	0.009422
13339602	AT1G13230	2.91483	3.20315	2.72541	3.50914	3.8398	3.49066	3.17868	3.2365	3.01636	3.35333	3.05432	3.10178	3.25786	3.10061	3.41058	3.2365	3.2232	3.39785	3.26062	4.01205	2.95925	3.60266	3.17544	3.76758	0.343031	-0.102534	0.685175	-0.272634	-0.616593	-0.09281	0.263852	0.033355	0.290956	-0.155803	-0.785479	-0.388876	0.002759	0.911441	-0.45133	0.366158	-0.047762	0.36973	-0.261093	0.878086	-0.742286	0.521961	0.737717	0.758606
13339607	AT1G13260	6.90872	6.81524	6.85466	6.28298	6.60523	6.07657	6.78144	6.4546	6.56404	6.58202	6.40825	6.46923	6.73388	6.69482	6.76464	6.66836	6.24819	6.33468	6.74645	6.6789	6.446	6.91006	6.42746	6.47586	-0.174835	-0.120424	-0.090023	0.385387	-0.357048	0.258112	-0.127272	-0.360644	-0.290622	0.299044	-0.196979	0.392663	0.01257	-0.015924	-0.31864	0.241693	0.179278	0.141177	0.139842	0.34472	-0.028018	-0.057351	0.376257	-0.251486
13339611	AT1G13270	9.49268	10.1182	9.95787	9.5161	8.11803	8.86535	9.42635	9.94451	10.0672	9.62144	8.19245	8.47842	9.46628	9.44386	9.31569	9.07749	8.87331	9.45889	9.49641	9.622	9.38239	9.23293	9.19857	9.38565	-0.026405	-0.674356	-0.642177	-0.438604	0.755273	0.593543	-0.066334	-0.173713	0.109372	0.105344	0.074414	-0.386929	0.030134	0.178141	0.066702	0.155441	0.325263	-0.073244	0.096468	0.351854	-0.04267	0.050097	0.250849	0.313685
13339626	AT1G13280	7.62212	7.77256	7.6246	7.36715	7.81421	7.97059	7.58619	7.75993	7.44201	7.62657	8.34481	8.64154	7.03025	7.09912	7.25302	6.98145	7.51326	7.54619	7.141	7.33086	7.32782	7.29228	7.64307	7.52245	-0.591874	-0.673444	-0.371575	-0.3857	-0.300954	-0.424404	-0.03593	-0.012629	-0.182587	0.259426	0.530599	0.670949	0.110754	0.231746	0.074792	0.31083	0.129816	-0.02374	0.146684	0.244375	0.257379	0.051404	-0.400783	-0.694689
13339631	AT1G13300	4.50371	5.28939	4.50784	5.8735	4.57959	5.26199	5.02907	5.37506	5.1679	5.55842	4.21239	4.01386	5.72356	4.76948	5.20377	6.2985	5.01003	5.21925	5.80675	5.28581	5.27941	6.64101	5.01968	4.8317	1.21985	-0.519919	0.695922	0.424997	0.430445	-0.042743	0.52536	0.085669	0.660058	-0.315087	-0.367193	-1.24813	0.0832	0.51633	0.075645	0.342505	0.00965	-0.387547	-0.44216	0.430661	-0.584413	0.657592	0.376843	0.860579
13339639	AT1G13330	3.89555	3.83986	3.17564	3.35851	3.29541	3.79019	3.50021	4.0189	3.62528	3.56358	3.62392	3.69457	4.63107	4.33788	4.58981	4.75897	3.51263	4.26332	3.4259	3.85203	4.22174	5.08011	3.77419	4.2297	0.735516	0.498017	1.41417	1.40046	0.217229	0.473125	-0.395341	0.179037	0.449644	0.205067	0.328514	-0.095622	-1.20517	-0.485853	-0.368069	0.321147	0.261558	-0.033616	-0.809831	-0.66489	-0.817713	0.11608	-0.066956	0.062006
13339648	AT1G13400	3.6112	3.7035	3.84423	3.92401	3.96027	3.91969	3.81504	4.22242	3.75041	3.71003	3.62134	4.06873	4.09478	3.82832	4.20723	4.17894	4.16513	4.20588	4.35782	3.93861	3.5079	3.66603	3.9184	4.23227	0.483577	0.124828	0.362997	0.254936	0.204864	0.286186	0.203831	0.518925	-0.093824	-0.213979	-0.338928	0.149039	0.263039	0.110283	-0.699332	-0.512907	-0.246729	0.026393	0.059208	-0.408642	-0.605508	-0.298928	0.092199	-0.122646
13339654	AT1G13410	5.88425	6.0727	6.32416	6.00457	5.25171	5.86329	5.51037	6.32819	6.13178	5.70035	5.51543	5.96625	5.5101	5.9869	6.30215	5.48496	5.04724	5.51037	5.39494	5.91996	5.63041	6.0089	5.09793	5.57585	-0.374155	-0.085803	-0.022012	-0.51961	-0.204469	-0.352916	-0.373878	0.255491	-0.192376	-0.304225	0.263721	0.10296	-0.115151	-0.066939	-0.671742	0.523935	0.050687	0.065472	0.258727	-0.32243	-0.479366	0.82816	-0.213034	-0.037488
13339659	AT1G13420	2.45663	2.91045	2.28796	3.03003	2.68001	2.63347	2.40802	3.1105	2.41464	2.49799	3.10267	2.6872	2.50919	2.40454	2.48058	2.39424	2.49909	2.63347	2.35309	2.58894	2.35057	2.71905	2.58123	2.4557	0.052557	-0.505912	0.192618	-0.635797	-0.180921	0	-0.048613	0.200045	0.126679	-0.532045	0.422655	0.053731	-0.156099	0.184401	-0.130016	0.324811	0.082141	-0.177768	-0.107486	-0.015644	-0.256695	0.856856	-0.340514	-0.231499
13339663	AT1G13430	2.75044	2.39527	3.95938	3.68696	3.05956	2.76197	2.31917	2.46161	2.55803	2.4158	3.49696	2.82953	2.47901	2.15435	2.31809	2.78234	2.24589	2.27837	2.21322	2.41693	2.25371	2.56486	2.6116	2.42154	-0.271433	-0.24092	-1.64129	-0.904621	-0.813669	-0.483601	-0.431268	0.066343	-1.40135	-1.27116	0.437401	0.067555	-0.265782	0.262579	-0.064381	-0.21748	0.365715	0.143167	0.165486	0.196236	1.33697	1.05367	-0.071686	0.075612
13339666	AT1G13450	7.34427	7.44757	7.3147	7.68166	8.07755	7.888	7.10639	7.14324	7.14383	7.41295	8.11839	7.17442	7.16051	7.68366	7.46863	8.01188	8.35714	7.69876	7.37395	7.28818	7.38162	7.79586	7.90954	6.99159	-0.183757	0.236092	0.15393	0.330217	0.279599	-0.18924	-0.237882	-0.304332	-0.170866	-0.268715	0.040845	-0.713579	0.213434	-0.395483	-0.087006	-0.216023	-0.4476	-0.70717	0.451316	-0.091151	0.08386	0.052692	-0.488445	0.006409
13339669	AT1G13460	6.89456	6.26741	6.59389	6.50077	6.46405	6.52001	6.55331	6.63866	6.50079	6.26541	6.59841	6.82142	6.40702	6.34349	6.511	6.5427	6.26091	6.25927	6.23398	6.21337	6.43285	6.78844	6.29179	6.43839	-0.487536	0.076076	-0.082886	0.041926	-0.203136	-0.260741	-0.341251	0.371248	-0.093092	-0.235358	0.134358	0.301418	-0.173042	-0.130116	-0.078153	0.245748	0.030875	0.179119	0.168209	-0.501364	0.014939	0.481106	-0.103483	-0.122299
13339676	AT1G13590	3.45607	3.74938	3.82634	4.07671	4.25346	4.00391	4.01346	3.71226	3.51154	3.91827	4.14994	3.83721	3.79248	4.67312	3.90385	3.91827	4.06713	3.99436	4.05105	3.82331	3.62296	3.79583	3.88492	4.10742	0.336406	0.923738	0.077501	-0.158443	-0.186326	-0.009555	0.557394	-0.037117	-0.314802	-0.158443	-0.103521	-0.166699	0.258578	-0.849806	-0.280883	-0.122439	-0.182217	0.113062	-0.298816	-0.812689	0.033919	0.036004	-0.078696	0.279761
13339680	AT1G13605	2.43507	2.44809	2.17001	2.31963	2.22059	2.15356	2.66124	2.50814	2.22827	2.26205	2.54822	2.07266	2.27698	2.32882	2.76962	2.68424	2.27618	2.51991	2.45421	2.43499	2.41901	2.2378	2.61492	2.41505	-0.15809	-0.119277	0.599608	0.36461	0.05559	0.36635	0.22617	0.060044	0.058253	-0.057578	0.327633	-0.080896	0.17723	0.106173	-0.350612	-0.446442	0.338738	-0.104861	-0.04894	0.046129	-0.408865	-0.388864	0.011105	-0.023965
13339685	AT1G13607	3.19771	3.70444	3.46446	3.99392	3.51067	3.80111	3.0337	3.6839	3.45437	3.61074	3.47574	3.69304	4.23081	3.58162	3.77047	3.61081	3.80749	3.576	3.6172	3.4453	3.89935	3.6172	4.09597	3.94592	1.03309	-0.12282	0.306017	-0.383111	0.296817	-0.225106	-0.164014	-0.020538	-0.010088	-0.383175	-0.03493	-0.108067	-0.613607	-0.136323	0.128881	0.006393	0.288487	0.369925	-0.449593	-0.115785	0.138969	0.389568	0.323417	0.477992
13339689	AT1G13608	2.95575	3.47219	3.55752	5.14726	4.91633	3.07074	2.76826	3.99318	3.34794	3.6394	2.98882	3.07202	4.3313	2.78636	3.36762	3.26791	2.98099	3.33611	3.62924	3.07147	3.68527	3.3888	3.17586	3.33611	1.37556	-0.68583	-0.189903	-1.87935	-1.93534	0.265364	-0.187491	0.520987	-0.209584	-1.50787	-1.92752	0.001275	-0.70206	0.285108	0.317651	0.120886	0.194862	0	-0.514569	-0.235879	0.527235	1.62875	2.12238	-0.001275
13339692	AT1G13609	6.11226	7.07429	7.32805	7.93559	8.28233	4.74989	5.39152	5.40902	5.96704	6.9591	7.24433	6.35816	4.51414	5.12896	5.63315	6.28315	6.245	5.76142	5.9047	4.13455	5.05288	4.39591	5.54177	6.3427	-1.59812	-1.94533	-1.6949	-1.65244	-2.03733	1.01153	-0.72074	-1.66527	-1.36101	-0.976491	-1.038	1.60827	1.39056	-0.994419	-0.58027	-1.88724	-0.703234	0.581281	2.1113	0.670855	0.780736	-0.910749	0.334767	-1.02699
13339698	AT1G13620	2.93421	3.19452	3.19452	2.76209	3.28892	3.09252	3.0211	3.18181	3.19452	2.91127	2.99787	3.19452	3.55267	3.36682	3.0935	3.27964	3.02985	3.00197	2.96907	3.22265	3.18193	3.12282	3.05959	3.19452	0.61846	0.172307	-0.101013	0.517545	-0.259072	-0.090553	0.086883	-0.012713	0	0.149177	-0.291053	0.101998	-0.583608	-0.144176	0.088423	-0.156812	0.029741	0.192551	-0.670491	-0.131463	0.088423	-0.305989	0.320794	0.090553
13339704	AT1G13635	3.69032	3.91231	4.03714	3.54383	4.00784	4.39952	3.76156	3.69395	3.26701	3.69274	4.07575	3.7395	4.2844	4.14899	3.87674	3.94441	4.42917	4.27585	3.85747	3.99734	3.7839	3.77636	4.16359	4.67234	0.594083	0.236677	-0.160399	0.400579	0.421325	-0.123676	0.071244	-0.218364	-0.77013	0.148908	0.067904	-0.660027	-0.426933	-0.151653	-0.092839	-0.168052	-0.26558	0.39649	-0.498177	0.066711	0.677291	-0.31696	-0.333484	1.05652
13339713	AT1G13670	7.36139	6.71882	5.98261	7.00142	6.46639	5.19137	7.46399	6.73362	5.62987	6.49642	5.34582	4.89496	7.38997	6.97231	6.76544	6.6914	6.59768	6.14575	7.58748	6.99666	6.42791	7.00724	5.73583	5.35595	0.028583	0.253492	0.782829	-0.310018	0.131286	0.954374	0.102601	0.014799	-0.352736	-0.505001	-1.12057	-0.296408	0.197509	0.024348	-0.337528	0.315831	-0.861855	-0.789797	0.094908	0.009549	0.015208	0.820832	0.258715	-0.493389
13339717	AT1G13680	3.14323	2.92603	3.10457	3.03075	3.09408	3.24174	3.34819	2.8998	3.12179	3.2685	3.06372	3.15486	3.71527	4.25059	3.54327	4.23058	3.74116	3.83324	3.88361	4.21584	3.22517	4.67818	3.51435	3.85042	0.572041	1.32456	0.438701	1.19983	0.64708	0.591503	0.204959	-0.026229	0.017225	0.237755	-0.030358	-0.086883	0.168336	-0.034755	-0.318104	0.447599	-0.22681	0.017182	-0.036623	-0.008526	-0.335329	0.209844	-0.196452	0.104065
13339726	AT1G13690	8.65315	8.5722	8.50012	8.44941	8.50686	8.32891	8.6511	8.44028	8.46409	8.31866	8.1834	7.983	8.53999	8.72171	8.63015	8.5785	8.74203	8.71964	8.60404	8.85885	8.53478	8.50839	8.70831	8.57516	-0.113165	0.149512	0.130031	0.129087	0.235171	0.390732	-0.002054	-0.131918	-0.036034	-0.13075	-0.32346	-0.345905	0.064052	0.137144	-0.095367	-0.070107	-0.033722	-0.14448	0.066106	0.269062	-0.059333	0.060643	0.289738	0.201425
13339731	AT1G75740	3.3713	3.29628	3.5194	3.33611	3.40451	3.44419	3.06304	3.22238	3.16599	3.80998	3.67432	3.48088	3.82073	3.71388	3.96356	3.37537	3.81191	3.89047	3.7216	3.8396	3.77974	3.51751	3.68427	3.8953	0.44943	0.417605	0.444161	0.03926	0.407395	0.446276	-0.308257	-0.073894	-0.353407	0.47387	0.26981	0.036692	-0.099129	0.125719	-0.183824	0.142147	-0.127638	0.004832	0.209128	0.199613	0.169583	-0.331723	-0.397448	-0.03186
13339733	AT1G13730	8.62901	8.73662	8.8825	9.20259	8.93627	9.2676	8.79468	8.75772	8.81742	9.01356	9.05335	8.81324	9.01831	9.0127	9.01356	9.33929	9.19469	9.69493	8.83339	8.77563	8.78003	9.16859	9.22496	9.5248	0.389295	0.276088	0.131064	0.136697	0.258421	0.427324	0.165668	0.021104	-0.065078	-0.189028	0.117077	-0.454369	-0.184916	-0.237076	-0.233537	-0.170699	0.030276	-0.170127	-0.350584	-0.25818	-0.168459	0.018329	-0.086801	0.284242
13339743	AT1G13740	7.20248	7.16551	7.59924	7.30823	6.67613	7.00117	7.19157	6.94382	7.38345	7.09213	6.56826	7.33243	6.59297	7.33359	7.30735	7.06088	6.7504	7.20752	6.55136	6.87428	7.27944	7.16423	6.87679	7.33387	-0.609503	0.168084	-0.291891	-0.247355	0.074269	0.206344	-0.01091	-0.221687	-0.215785	-0.216102	-0.107869	0.331262	-0.04161	-0.459306	-0.027909	0.103348	0.126394	0.126352	-0.0307	-0.237619	0.187876	0.31945	0.234263	-0.20491
13339748	AT1G13770	7.808	7.68563	7.94006	7.95702	7.64972	7.84933	7.70373	7.83701	7.85562	8.04906	7.87372	7.72865	8.0097	7.92593	8.14141	8.23696	7.95593	7.97757	8.01861	7.91401	7.98206	8.24718	7.97352	7.8942	0.201697	0.240295	0.201352	0.279943	0.306211	0.12824	-0.104277	0.151378	-0.084443	0.092042	0.223998	-0.120681	0.008907	-0.011917	-0.15935	0.010216	0.017593	-0.083377	0.113184	-0.163295	-0.074907	-0.081826	-0.206405	0.037304
13339765	AT1G13780	7.32028	7.66284	7.35546	7.93396	7.51032	7.56551	7.54512	7.537	7.53377	7.89338	7.17798	7.25087	7.59429	7.57747	7.69106	7.76656	7.62628	7.66586	7.64281	7.69564	7.55959	8.07496	7.66711	7.90483	0.274012	-0.085376	0.335603	-0.167399	0.115959	0.100344	0.22484	-0.125845	0.178307	-0.040572	-0.332344	-0.314642	0.048522	0.11817	-0.131471	0.308401	0.040832	0.238969	-0.176318	0.244015	-0.309778	0.348973	0.373176	0.553611
13339771	AT1G13790	8.13256	8.4513	8.74803	7.96231	8.10612	7.77018	8.0101	8.10547	8.65003	7.57759	7.77866	7.54928	8.4728	8.89115	8.83137	8.12408	8.38871	8.10102	8.10227	8.36945	8.41298	7.75657	8.21684	7.97152	0.340238	0.439852	0.083338	0.161767	0.28259	0.330845	-0.122461	-0.345829	-0.098007	-0.384717	-0.327457	-0.220901	-0.370533	-0.52171	-0.418392	-0.367507	-0.171866	-0.129505	-0.248072	-0.175881	-0.320385	0.01721	0.155591	0.091396
13339779	AT1G13810	6.93792	7.00286	6.92829	6.79244	6.71672	6.87307	7.09595	7.12645	7.07859	6.68758	6.78174	6.63558	7.31577	6.93594	7.0877	6.97402	6.82948	7.249	7.56951	7.47742	7.37163	7.08352	7.1234	7.31876	0.377849	-0.066918	0.159417	0.181581	0.112756	0.375931	0.158031	0.123595	0.150306	-0.104866	0.065018	-0.23749	0.253745	0.541479	0.283923	0.1095	0.29392	0.06976	0.095714	0.417884	0.133617	0.214366	0.228902	0.30725
13339784	AT1G13820	9.40612	9.24362	9.02323	9.12742	10.0096	9.99582	9.27928	9.04061	8.89577	9.04102	9.84089	9.61682	9.82208	9.47999	9.14069	9.3851	10.1418	10.0062	9.67137	9.33883	9.23869	9.31798	10.0986	9.87457	0.415964	0.236371	0.117464	0.257675	0.13228	0.010396	-0.126833	-0.203013	-0.12746	-0.086407	-0.168683	-0.379007	-0.150715	-0.141157	0.097999	-0.067117	-0.04328	-0.13165	-0.023882	0.061856	0.225459	0.01929	0.125403	0.247357
13339797	AT1G13880	8.3935	8.33641	8.3388	8.09952	8.35455	7.96314	8.35302	8.30446	8.33695	8.1243	8.26498	8.08434	8.71429	8.4778	8.55106	8.29365	8.5102	8.37424	8.57977	8.59268	8.56019	8.31742	8.42424	8.30457	0.32078	0.141392	0.212264	0.194133	0.15565	0.411108	-0.040487	-0.031947	-0.001843	0.024786	-0.089574	0.121209	-0.134511	0.114874	0.009131	0.023767	-0.085963	-0.069671	-0.094024	0.146821	0.010974	-0.001019	0.003611	-0.19088
13339802	AT1G13890	2.98491	3.57775	3.23443	3.16332	3.31596	3.83764	3.3927	3.85477	3.50327	3.76076	3.27099	4.15897	3.87221	3.81083	3.58643	3.55309	3.31489	3.56869	3.86436	3.56757	3.87221	3.65852	3.70699	3.35778	0.887291	0.233074	0.352006	0.389773	-0.001067	-0.268949	0.407787	0.277019	0.268841	0.597439	-0.044969	0.321332	-0.007846	-0.24326	0.285772	0.105432	0.392106	-0.210913	-0.415633	-0.520279	0.016931	-0.492007	0.437075	-0.532245
13339808	AT1G13910	7.457	7.44001	7.30838	7.0499	7.23003	7.10557	7.1433	7.23485	6.86971	7.23756	7.31838	6.82144	7.17581	7.46799	7.34663	6.84709	7.63805	7.54598	7.19671	7.16624	6.95578	7.26985	7.23756	7.1026	-0.281188	0.027978	0.038248	-0.202806	0.408018	0.440412	-0.313697	-0.205162	-0.438667	0.187666	0.088351	-0.284128	0.020898	-0.301745	-0.390846	0.422755	-0.400484	-0.443379	0.334595	-0.096583	0.047821	0.235089	-0.488835	-0.159251
13339822	AT1G13920	6.35683	6.46936	5.75077	5.6027	5.97665	5.99964	6.56989	6.57456	5.78481	5.66786	5.85738	5.56423	6.24522	6.38547	6.27524	5.63348	5.90209	5.81629	5.78004	6.3615	5.88408	5.6878	5.81375	5.5544	-0.111616	-0.083896	0.524462	0.030776	-0.074558	-0.183352	0.213056	0.105195	0.034032	0.065158	-0.119271	-0.435414	-0.465173	-0.023966	-0.391154	0.054323	-0.088343	-0.261885	-0.678229	-0.129161	-0.425186	-0.010835	0.030928	0.173529
13339830	AT1G13930	6.47815	7.00911	6.72369	5.73373	6.4249	6.89776	6.75172	6.52244	6.8352	6.05895	6.37887	6.77664	6.06275	6.67875	6.08968	4.81815	5.81087	6.29297	6.25289	6.72947	6.11197	5.62552	6.32134	6.35037	-0.415405	-0.330357	-0.634005	-0.915573	-0.614027	-0.604784	0.273573	-0.486669	0.111512	0.325218	-0.046035	-0.12112	0.190142	0.050724	0.022284	0.807367	0.510461	0.057396	-0.083431	0.537393	-0.089228	0.482149	0.556496	0.178516
13339835	AT1G13950	7.24502	7.67974	7.71598	7.64845	7.27121	7.47326	7.32163	7.48656	7.97032	7.92585	7.60481	8.2249	6.24168	7.14066	7.32242	7.84693	6.95224	7.41276	6.77684	7.28788	7.81037	7.91483	7.31997	7.37768	-1.00334	-0.539088	-0.393557	0.198487	-0.318968	-0.0605	0.076614	-0.193179	0.254346	0.277408	0.333597	0.75164	0.535158	0.147223	0.487953	0.067897	0.367724	-0.035079	0.458544	0.340402	0.233607	-0.209511	0.034127	-0.786719
13339843	AT1G13960	7.63543	7.52439	7.41134	7.61526	7.12284	7.04246	7.75249	7.66391	7.42336	7.57768	7.0524	7.663	7.854	7.63273	7.75295	8.21649	7.7022	7.68619	8.05641	8.01136	8.0351	8.04081	7.52745	7.62786	0.218578	0.108337	0.341613	0.601231	0.579367	0.643727	0.117062	0.139515	0.012019	-0.037585	-0.070434	0.620541	0.202402	0.378634	0.282152	-0.175689	-0.17475	-0.058326	0.08534	0.239119	0.270133	-0.138104	-0.104316	-0.678867
13339852	AT1G13980	6.58638	6.44165	6.62881	6.95121	6.53083	6.43376	6.63653	6.66957	6.45811	6.79662	6.61232	6.52347	6.57009	6.60629	6.74378	7.11748	6.56497	6.49971	6.59417	6.35119	6.49917	6.93412	6.61056	6.4881	-0.01629	0.164638	0.114974	0.166267	0.034139	0.065951	0.050155	0.227923	-0.170697	-0.154588	0.081486	0.089708	0.024088	-0.2551	-0.244617	-0.183358	0.045591	-0.011615	-0.026067	-0.483023	-0.07392	-0.02877	-0.035895	-0.101323
13339861	AT1G13990	8.32029	8.72524	8.21677	7.14723	8.10486	7.96857	8.43827	8.85705	8.88378	7.53264	8.69556	9.10675	8.62884	9.10328	9.09612	8.39942	8.89288	8.78509	9.14801	9.39027	9.24625	8.50178	9.09932	9.09884	0.308554	0.378047	0.879356	1.25219	0.78802	0.816523	0.117983	0.131814	0.667015	0.385413	0.590705	1.13818	0.519167	0.286983	0.150124	0.102361	0.206441	0.313748	0.401184	0.155169	-0.516891	-0.283052	-0.384264	-0.824432
13339873	AT1G14000	10.2085	9.99038	9.88788	9.97383	10.2791	10.283	10.2841	10.0648	10.355	10.0572	10.4235	10.4821	10.4992	10.4978	10.4858	10.4602	10.7346	10.5858	10.5238	10.4913	10.4799	10.5183	10.67	10.5636	0.29071	0.507409	0.597919	0.486321	0.45551	0.30274	0.0756	0.074449	0.467079	0.083391	0.14439	0.19905	0.02459	-0.00651	-0.00589	0.05812	-0.06463	-0.0222	-0.05101	-0.080959	-0.472969	-0.025271	-0.20902	-0.22125
13339886	AT1G14020	8.6167	8.56237	8.59378	8.78459	8.72187	8.62881	8.43777	8.55863	8.39274	8.67191	8.58183	8.64939	8.46278	8.754	8.53321	8.72495	8.60238	8.65737	8.38156	8.29359	8.79389	8.56688	8.64173	8.61559	-0.153925	0.191631	-0.060578	-0.059638	-0.119485	0.02856	-0.178932	-0.003734	-0.201039	-0.112675	-0.140036	0.020576	-0.081221	-0.460404	0.260682	-0.15807	0.039349	-0.041781	0.097711	-0.45667	0.461721	-0.045395	0.179385	-0.062357
13339897	AT1G14040	4.77566	5.61123	5.54822	5.93309	4.68278	4.90364	4.62969	5.51325	5.87867	5.32602	5.21781	5.25168	4.23081	5.20572	5.93964	5.12405	4.52759	5.17974	4.89836	5.18759	4.74813	5.42176	4.70493	4.87273	-0.544856	-0.405511	0.391421	-0.80904	-0.155193	0.276106	-0.145976	-0.097986	0.330445	-0.607071	0.535024	0.348045	0.667557	-0.018127	-1.19151	0.29771	0.177338	-0.307013	0.813533	0.079859	-1.52196	0.904781	-0.357686	-0.655058
13339910	AT1G14070	6.20283	6.02131	6.40479	6.74667	6.37364	6.20701	6.50685	6.57116	6.67653	6.76565	6.36672	5.93789	7.10106	7.85218	7.93153	7.76487	7.85605	7.81448	7.12262	7.84155	7.99241	7.76002	7.9011	7.94245	0.898236	1.83087	1.52674	1.0182	1.4824	1.60747	0.304021	0.549851	0.271734	0.018976	-0.006927	-0.269125	0.021554	-0.010626	0.060884	-0.004852	0.045054	0.127967	-0.282467	-0.560477	-0.21085	-0.023828	0.051981	0.397092
13339913	AT1G14080	2.8283	3.01367	2.61034	2.79081	2.65103	2.51123	2.62645	2.72608	2.74138	2.67556	2.66941	2.91323	3.66766	3.34281	4.41481	3.57423	3.92031	3.83237	3.32759	4.04733	4.2151	3.81219	3.6132	3.87727	0.839358	0.329145	1.80447	0.783422	1.26928	1.32114	-0.201849	-0.287582	0.131041	-0.115248	0.018389	0.401999	-0.340069	0.704519	-0.199705	0.237965	-0.307108	0.044902	-0.13822	0.992101	-0.330746	0.353213	-0.325497	-0.357097
13339918	AT1G14100	2.911	3.54061	3.36579	3.29245	3.33674	3.49838	3.24447	3.19654	3.46478	3.02794	3.17467	3.47787	5.01509	5.34477	5.98309	6.85986	6.6755	6.3546	4.58166	4.27172	5.84618	6.85134	6.06659	5.59778	2.10409	1.80416	2.6173	3.56742	3.33877	2.85622	0.333467	-0.344067	0.098983	-0.264502	-0.162063	-0.02051	-0.433434	-1.07305	-0.13691	-0.008522	-0.608917	-0.756821	-0.766901	-0.728982	-0.235893	0.25598	-0.446854	-0.736311
13339921	AT1G14110	3.08617	3.383	3.07282	3.3789	2.64049	2.7838	3.04585	2.64274	2.92814	2.91353	3.4047	3.21727	3.33928	3.22814	2.82456	2.94031	3.06628	3.47157	2.77886	3.12039	3.77563	3.05244	3.18065	3.30838	0.253101	-0.154859	-0.248263	-0.438596	0.425789	0.687765	-0.040326	-0.74026	-0.144675	-0.465368	0.764208	0.433466	-0.560415	-0.107754	0.951078	0.112128	0.114371	-0.163186	-0.520089	0.632506	1.09575	0.577496	-0.649837	-0.596652
13339925	AT1G14150	10.0112	10.2129	10.8857	10.8752	10.852	10.7593	10.0072	10.0403	10.7993	10.8069	10.442	9.96367	10.0118	10.2099	10.7416	10.8953	10.5833	10.5084	9.84475	10.1551	10.7483	10.8176	10.4005	10.1356	0.00056	-0.00302	-0.14404	0.02012	-0.26874	-0.25087	-0.00398	-0.17264	-0.08635	-0.06831	-0.41006	-0.795586	-0.167024	-0.05474	0.00663	-0.0777	-0.18278	-0.37277	-0.163044	0.1179	0.09298	-0.00939	0.22728	0.422816
13339930	AT1G14180	7.4981	7.44543	7.59763	7.74815	7.49801	7.33183	7.40074	7.56102	7.64082	7.58457	7.3757	7.147	7.82711	7.96629	7.95083	7.88049	7.84608	7.65911	7.57345	7.67059	7.56506	7.52722	7.51676	7.63009	0.329012	0.52087	0.353202	0.132345	0.348068	0.327287	-0.097356	0.115597	0.043196	-0.163576	-0.122311	-0.184828	-0.253657	-0.295702	-0.385764	-0.353269	-0.329319	-0.029024	-0.156301	-0.411299	-0.42896	-0.189693	-0.207008	0.155804
13339937	AT1G14185	3.71496	3.44845	3.8184	3.52439	3.52172	3.53428	3.56002	3.42888	3.47219	3.28715	3.6129	3.74226	3.32076	3.87604	3.14815	3.39576	4.04055	3.42026	3.19494	3.75974	3.89651	3.51186	4.23212	3.20858	-0.394208	0.427592	-0.670247	-0.12863	0.518828	-0.114023	-0.154941	-0.019569	-0.346208	-0.237242	0.091181	0.207982	-0.125812	-0.116303	0.748362	0.116102	0.191576	-0.21168	0.029129	-0.096734	1.09457	0.353344	0.100395	-0.419662
13339941	AT1G14190	6.32917	6.04051	6.42433	6.68772	6.78995	6.34829	6.49599	6.56217	6.16662	6.00984	6.50364	5.12072	5.94986	6.14495	5.99623	6.04352	6.31604	5.43013	5.7533	5.32203	5.90214	6.00426	6.07247	5.78604	-0.37931	0.104438	-0.428097	-0.644201	-0.473905	-0.918162	0.166821	0.521659	-0.257706	-0.677878	-0.286307	-1.22757	-0.196561	-0.822915	-0.094092	-0.039259	-0.243571	0.355909	-0.363382	-1.34457	0.163614	0.638619	0.042736	1.58347
13339943	AT1G14205	8.81297	8.86325	8.70776	8.03579	8.47175	7.775	8.89052	8.87124	8.71408	7.73581	8.14503	7.02428	8.18692	8.62771	8.36018	7.93735	8.24579	7.74658	8.42094	8.50283	8.17703	7.59391	8.04968	7.44985	-0.626046	-0.235545	-0.347578	-0.098446	-0.22595	-0.02842	0.07755	0.00799	0.006316	-0.299988	-0.326717	-0.750718	0.234022	-0.124872	-0.183153	-0.343436	-0.196118	-0.296724	0.156472	-0.132862	-0.189469	-0.043448	0.130599	0.453994
13339949	AT1G14230	7.49652	7.30838	6.86881	7.39563	7.25659	7.45863	7.40263	7.05281	7.02686	7.2744	7.16331	7.80552	7.67544	7.28728	7.20211	7.3322	7.34831	7.33019	7.63476	7.5763	7.31108	7.45354	7.41719	7.78837	0.178921	-0.021096	0.333297	-0.063429	0.091717	-0.128434	-0.093895	-0.255566	0.158042	-0.121231	-0.093282	0.346896	-0.040681	0.289021	0.10897	0.121335	0.068882	0.458176	0.053214	0.544587	-0.049072	0.242566	0.162164	0.11128
13339960	AT1G14240	3.7628	4.06184	4.03579	4.00715	3.62406	3.78104	3.56169	3.98936	4.11886	4.23064	3.63882	4.02399	4.07444	3.63247	4.44577	3.7969	3.97009	4.5638	4.42081	3.83732	3.99937	3.76219	4.45374	4.13671	0.311641	-0.429363	0.409977	-0.210251	0.346023	0.782764	-0.201114	-0.072477	0.083064	0.223492	0.014762	0.242951	0.346366	0.204841	-0.446399	-0.034713	0.483658	-0.427093	0.54748	0.277318	-0.529463	-0.258205	0.468896	-0.670044
13339973	AT1G14250	6.27838	4.68903	5.25865	4.72669	7.75534	7.14112	5.17513	5.27422	6.87767	6.44575	10.1853	10.942	7.60091	6.10914	6.20623	5.30102	7.57435	8.25416	7.96945	5.95047	6.77474	6.59316	9.95895	10.5165	1.32253	1.42011	0.947581	0.574338	-0.180987	1.11304	-1.10325	0.585192	1.61902	1.71907	2.43	3.80088	0.368542	-0.158667	0.568507	1.29214	2.38459	2.26233	1.47179	-0.743859	-1.05051	-0.426931	-0.045406	-1.53855
13339984	AT1G14260	2.96971	2.85802	2.6541	3.11034	2.68244	2.6242	3.20968	2.66928	2.62702	2.74188	3.00574	3.04268	2.78364	2.78227	2.90662	3.48026	2.78282	3.08264	3.25433	2.8419	3.27249	3.32236	3.09477	3.19142	-0.186073	-0.075748	0.252521	0.369919	0.100386	0.458433	0.23997	-0.188737	-0.027084	-0.368467	0.323305	0.418476	0.470696	0.059625	0.365869	-0.157904	0.311945	0.108783	0.230726	0.248362	0.392953	0.210563	-0.01136	-0.309693
13339995	AT1G14280	10.2684	10.2575	9.93533	9.64964	10.2797	9.93356	10.3243	10.1283	9.76375	9.51429	9.99454	9.23533	10.1182	10.1103	9.63386	9.24058	10.1117	9.841	9.95501	10.0928	9.24502	9.0486	9.75753	9.23288	-0.1502	-0.14712	-0.301471	-0.40906	-0.16799	-0.092566	0.05588	-0.12919	-0.171572	-0.135355	-0.285127	-0.698237	-0.163212	-0.01753	-0.388837	-0.191979	-0.354153	-0.608116	-0.219092	0.11166	-0.217265	-0.056624	-0.069026	0.090121
13339998	AT1G14310	9.3592	9.70476	9.35999	9.12229	9.57703	9.56132	9.38834	9.51754	9.51562	8.94473	9.33773	9.23436	9.26779	9.65475	9.36468	8.86617	9.35775	9.29299	9.21838	9.5098	9.32757	8.32587	9.42505	9.3085	-0.091417	-0.05001	0.004687	-0.256114	-0.219278	-0.268334	0.029132	-0.187222	0.155628	-0.177562	-0.239293	-0.326957	-0.049406	-0.144947	-0.037108	-0.540306	0.067299	0.01551	-0.078538	0.042275	-0.192736	-0.362744	0.306592	0.342467
13340009	AT1G14320	10.8286	10.7901	10.6696	10.9274	10.6709	11.0786	10.7487	10.7477	10.7802	10.7535	10.6715	10.6956	10.8517	10.6738	10.6082	10.7003	10.6441	11.1144	10.9099	10.825	10.6779	10.8506	10.8118	11.0873	0.02318	-0.11626	-0.06138	-0.22705	-0.02685	0.03579	-0.07987	-0.04234	0.11061	-0.1739	0.00058	-0.38297	0.05818	0.15114	0.06966	0.15035	0.16771	-0.02708	0.13805	0.19348	-0.04095	0.32425	0.16713	0.35589
13340017	AT1G14340	8.83582	9.08346	8.90044	9.34303	9.40898	9.42087	8.87314	8.98317	8.89126	9.38306	9.40446	9.3757	8.35198	8.5978	8.55389	9.03093	8.99858	8.91791	8.12337	8.29441	8.48632	8.76454	8.71015	9.01891	-0.483847	-0.485662	-0.346543	-0.31209	-0.410401	-0.502959	0.037314	-0.100289	-0.009176	0.040037	-0.00452	-0.045165	-0.228606	-0.303386	-0.067576	-0.266393	-0.288426	0.101001	-0.26592	-0.203097	-0.0584	-0.30643	-0.283906	0.146166
13340024	AT1G14345	9.67018	9.95302	10.3229	10.0031	10.4612	10.4022	9.70201	9.53124	10.2283	10.0322	10.2988	9.77262	9.94173	9.95608	10.0652	9.85587	10.3446	10.3076	9.95176	10.0066	10.1723	9.93957	10.2744	10.1145	0.271558	0.003066	-0.25775	-0.147284	-0.11658	-0.09458	0.031837	-0.421775	-0.09465	0.02905	-0.16237	-0.629564	0.010023	0.050536	0.10714	0.083709	-0.0702	-0.19306	-0.021814	0.472311	0.20179	0.054659	0.09217	0.436504
13340027	AT1G14350	6.51719	6.35097	6.70535	7.17999	6.99926	6.82497	6.19973	6.1258	6.40821	7.37809	6.82835	6.46619	6.67519	6.99696	6.88855	7.77799	7.35412	7.22187	6.46215	6.74599	6.97191	7.65968	7.009	6.75232	0.157996	0.645991	0.183197	0.598001	0.354865	0.396896	-0.317465	-0.225168	-0.297145	0.198097	-0.17091	-0.358782	-0.213039	-0.250965	0.083364	-0.118308	-0.345121	-0.469554	0.104426	-0.025797	0.380509	-0.316405	-0.174211	-0.110772
13340042	AT1G14370	9.27783	8.81324	8.7466	8.4754	8.66574	8.33514	9.36239	8.88898	8.95915	8.93677	8.79267	9.38017	9.5387	9.43214	9.42619	9.14024	9.24427	9.25523	9.65372	9.65369	9.29472	9.27786	9.38317	9.55793	0.260875	0.6189	0.679595	0.664844	0.578527	0.920092	0.084559	0.075746	0.212552	0.461371	0.126928	1.04503	0.115017	0.221549	-0.131468	0.137622	0.138903	0.302702	0.030458	0.145803	-0.34402	-0.323749	0.011975	-0.742329
13340051	AT1G14390	5.61989	6.17202	6.14506	6.74123	6.39111	5.68173	5.52262	6.03645	5.92086	6.14845	6.06291	5.95879	6.64119	6.90884	6.61195	6.63562	6.49295	6.02425	5.78506	6.15245	6.26951	6.3603	6.47427	6.20561	1.0213	0.73682	0.466884	-0.105609	0.101839	0.342522	-0.097275	-0.135571	-0.224206	-0.592778	-0.328194	0.277056	-0.85613	-0.756385	-0.342439	-0.275324	-0.018676	0.181352	-0.758855	-0.620814	-0.118233	0.317454	0.309518	-0.095704
13340057	AT1G14430	5.35741	5.14143	5.20447	5.04855	5.8343	4.93323	5.16586	4.99353	5.0091	4.79747	5.48236	4.53355	5.90572	5.06544	5.17847	5.99707	6.10346	4.94412	5.61013	5.22763	5.7131	5.45106	5.41351	5.10071	0.548309	-0.075982	-0.026002	0.948513	0.269161	0.010894	-0.191551	-0.147897	-0.195368	-0.251083	-0.35194	-0.399674	-0.295591	0.162182	0.534638	-0.546004	-0.689949	0.156595	-0.10404	0.310079	0.730006	-0.294921	-0.338009	0.556269
13340061	AT1G14470	6.73157	7.20028	7.80378	7.31028	6.26512	5.91955	5.80547	7.57099	7.61188	7.39056	6.22095	6.19761	6.22153	7.22639	7.37086	6.71793	6.02997	6.40707	6.40834	7.17269	7.99502	6.80434	6.26153	6.50325	-0.510043	0.026109	-0.43292	-0.592356	-0.235144	0.487516	-0.926097	0.370703	-0.191907	0.080276	-0.044164	0.278058	0.18681	-0.053702	0.624159	0.08641	0.231554	0.096182	1.11291	-0.424405	0.816066	0.006134	0.275718	-0.181876
13340063	AT1G14480	4.47576	4.92267	5.64832	5.23858	4.52284	4.38862	5.12852	5.3477	5.3858	5.25021	4.57289	4.51201	4.65258	5.03805	5.54532	5.08851	4.35221	4.93872	4.56529	5.08019	5.27189	5.32122	4.73948	5.00551	0.176818	0.115379	-0.103006	-0.150075	-0.170636	0.550101	0.652758	0.425027	-0.262521	0.011631	0.050053	0.123396	-0.087289	0.042141	-0.273429	0.232708	0.387271	0.066794	-0.740047	-0.382886	-0.010908	0.221077	0.337218	-0.056602
13340070	AT1G14500	3.53277	3.5165	3.18375	3.39524	3.60752	3.95099	3.24824	3.67257	3.4451	3.29186	3.05609	3.35043	3.59423	3.46389	3.50933	3.5042	3.4681	3.5123	3.95841	3.39127	3.78673	3.63924	3.22534	3.93917	0.061461	-0.05261	0.325578	0.108956	-0.139417	-0.438694	-0.284525	0.156067	0.261351	-0.103381	-0.551422	-0.600567	0.364183	-0.07262	0.277395	0.135048	-0.242761	0.426872	0.648708	-0.228687	0.016044	0.238429	0.308661	1.02744
13340073	AT1G14550	3.99982	3.98946	3.38262	4.0269	4.18243	3.81744	4.14343	4.15145	3.95862	4.22974	3.78495	3.99642	4.4361	3.99642	4.19665	4.14405	3.78324	3.85238	4.24472	4.08911	4.92046	4.17831	3.7296	4.12866	0.436279	0.006957	0.814028	0.117155	-0.39919	0.03494	0.143615	0.161988	0.576002	0.202845	-0.397489	0.178974	-0.191381	0.092695	0.723816	0.034254	-0.053647	0.276274	-0.334996	-0.069293	0.147814	-0.168591	0.343842	0.0973
13340078	AT1G14560	9.40524	9.47047	9.34183	9.39222	9.44349	9.17263	9.26292	9.43812	9.53803	9.45791	9.38743	9.49933	9.6344	9.64039	9.74762	9.49275	9.70844	9.38714	9.47927	9.53395	9.88335	9.53433	9.56603	9.56838	0.229162	0.169927	0.405795	0.100531	0.264949	0.214508	-0.142319	-0.032349	0.196207	0.065688	-0.056065	0.326699	-0.155135	-0.10644	0.135732	0.041574	-0.142406	0.181242	-0.012816	-0.074091	-0.060475	-0.024114	-0.086341	-0.145457
13340088	AT1G14570	8.98298	9.05202	9.01293	9.14451	9.04758	9.04349	9.07841	9.1468	8.95683	8.9688	9.08198	8.96332	9.16571	9.18517	9.06073	9.27959	9.18266	9.02246	9.10013	9.09141	9.1199	9.17162	9.02236	9.17826	0.182728	0.133154	0.047801	0.135083	0.135076	-0.021033	0.095424	0.094782	-0.056098	-0.175706	0.034405	-0.080171	-0.065575	-0.093761	0.059166	-0.10797	-0.160293	0.155803	-0.160999	-0.188543	0.115264	0.067736	-0.194698	0.235974
13340102	AT1G14580	7.55905	6.56128	7.01342	8.04128	7.98461	8.27759	7.48226	6.70071	7.1689	8.34552	8.06799	8.52774	7.33824	6.96891	7.45399	8.57138	7.7422	8.20139	7.32053	6.49487	7.00012	8.36111	7.9881	8.20594	-0.220819	0.407621	0.440572	0.530104	-0.242407	-0.076195	-0.076794	0.13943	0.155477	0.304239	0.083381	0.250157	-0.017703	-0.474038	-0.453878	-0.210274	0.245899	0.004549	0.059091	-0.613468	-0.609355	-0.514513	0.162518	-0.245608
13340110	AT1G14630	6.90969	6.84497	6.90266	6.43218	6.93477	6.86538	6.93515	6.67024	6.29786	6.31966	6.83591	6.17022	7.00792	7.01665	6.75867	6.71485	6.99516	6.68163	6.8	6.74576	6.77965	6.33166	6.75925	6.5983	0.09823	0.17168	-0.143986	0.282665	0.060396	-0.183758	0.025457	-0.17473	-0.604794	-0.112521	-0.098857	-0.695163	-0.207926	-0.270882	0.020985	-0.383188	-0.235909	-0.083323	-0.233383	-0.096152	0.625779	-0.270667	-0.137052	0.61184
13340118	AT1G14640	5.82578	6.00062	5.94178	6.10887	5.59189	5.80373	6.00136	6.35548	5.79386	5.60078	6.03703	5.4861	7.02184	6.61967	6.68986	6.65964	6.42316	6.14698	6.67016	6.25569	6.55441	6.36379	5.87517	6.08223	1.19606	0.619051	0.748078	0.550771	0.831262	0.34325	0.175577	0.354861	-0.147917	-0.508096	0.445132	-0.317633	-0.351683	-0.363982	-0.135451	-0.295852	-0.547983	-0.064748	-0.52726	-0.718843	0.012466	0.212244	-0.993115	0.252885
13340121	AT1G14642	7.93178	8.60027	8.29744	8.82582	8.44115	8.3617	8.57271	8.35814	8.27182	8.39532	8.54494	8.17084	8.97965	8.47957	8.53472	8.54494	8.67352	8.39066	8.78006	8.78944	8.87435	8.90582	8.68249	8.55226	1.04787	-0.120707	0.237275	-0.280875	0.232364	0.028956	0.640932	-0.242132	-0.025628	-0.4305	0.10379	-0.190865	-0.199594	0.309878	0.339634	0.360873	0.008968	0.1616	-0.840526	0.55201	0.365262	0.791373	-0.094822	0.352465
13340124	AT1G14650	9.0118	9.19542	8.93316	9.38115	9.03897	8.8643	9.04934	9.13631	9.07368	9.22403	8.98619	8.60188	9.13786	8.97987	9.13412	9.29809	9.14798	9.16854	9.09574	9.0339	9.22043	9.41841	9.1058	9.05049	0.126057	-0.215559	0.200964	-0.083059	0.109013	0.304234	0.037543	-0.059117	0.140526	-0.157121	-0.052777	-0.262421	-0.042119	0.054038	0.086313	0.120318	-0.042179	-0.118044	-0.079662	0.113155	-0.054213	0.277439	0.010598	0.144377
13340132	AT1G14670	10.9782	10.9268	10.836	10.9855	10.8238	10.785	10.9753	10.8357	10.8778	10.9598	10.9151	10.9232	11.1209	11.0355	11.0999	11.0787	10.9787	10.9305	11.1406	11.0696	11.0915	11.0993	10.9744	10.9636	0.14273	0.10863	0.2639	0.0932	0.15498	0.14551	-0.00288	-0.09117	0.0418	-0.02577	0.09131	0.13823	0.01968	0.03417	-0.00845	0.02053	-0.00433	0.0331	0.02256	0.12534	-0.05025	0.0463	-0.09564	-0.10513
13340142	AT1G14680	6.27713	6.35889	6.45684	7.16465	5.80246	6.3562	6.64012	7.13632	6.48925	6.95372	5.86956	5.83878	6.79041	6.86436	6.97296	7.1257	6.07215	6.13812	5.94765	6.56308	6.72013	6.9257	6.43613	6.33664	0.513277	0.505474	0.516123	-0.038955	0.269687	-0.218079	0.362986	0.77743	0.032412	-0.210935	0.067094	-0.517424	-0.842762	-0.301287	-0.252832	-0.200002	0.363974	0.19852	-1.20575	-1.07872	-0.285244	0.010933	0.29688	0.715944
13340144	AT1G14685	8.50987	8.67364	8.57847	8.70035	7.69625	7.74338	8.34646	8.4771	8.70121	8.5546	7.57009	7.50626	8.38613	8.54506	8.70409	8.3731	7.74155	7.67877	8.318	8.66301	8.69419	8.61126	7.81855	7.71859	-0.123743	-0.128578	0.125625	-0.327244	0.0453	-0.064608	-0.163408	-0.196533	0.122748	-0.145747	-0.126157	-0.237121	-0.068126	0.117951	-0.009904	0.23816	0.077	0.039815	0.095282	0.314484	-0.132652	0.383907	0.203157	0.276936
13340150	AT1G14687	4.66121	4.86104	4.82113	5.1953	4.61074	4.92979	4.87466	4.49182	5.09961	5.33272	4.38884	4.57717	5.40829	4.67696	4.97877	5.87371	5.01532	4.90978	4.7864	4.73617	4.65053	5.64487	4.66318	4.62892	0.747073	-0.184083	0.157639	0.678408	0.40458	-0.020008	0.213447	-0.369226	0.278482	0.137418	-0.221904	-0.352624	-0.621883	0.059214	-0.328237	-0.228842	-0.352143	-0.28086	-0.83533	0.42844	-0.606719	-0.36626	-0.130239	0.071764
13340153	AT1G14700	8.13282	8.76158	8.7944	8.17561	8.88723	8.55405	8.30479	8.26575	8.75433	8.06323	8.49247	6.97405	7.68987	8.36752	8.44443	7.80529	8.5093	8.02213	7.88591	8.0753	8.27478	7.90315	8.09159	7.1257	-0.442952	-0.394059	-0.349962	-0.370322	-0.377937	-0.531925	0.17197	-0.495827	-0.040069	-0.112384	-0.394762	-1.58	0.196037	-0.292213	-0.169654	0.09786	-0.417706	-0.89643	0.024067	0.203614	-0.129585	0.210244	-0.022944	0.683572
13340161	AT1G14730	7.12573	7.14063	6.68818	7.29954	6.59561	6.83856	7.04193	7.30013	6.87945	7.08852	6.62259	6.09828	7.6742	7.56058	7.20534	7.18066	7.41052	6.9037	7.59176	7.47402	7.76144	7.42911	7.24354	6.71131	0.548474	0.419952	0.517167	-0.118887	0.814902	0.065134	-0.083794	0.159498	0.191275	-0.211019	0.026982	-0.740284	-0.082434	-0.086556	0.556097	0.248456	-0.166977	-0.192389	0.00136	-0.246054	0.364822	0.459475	-0.193959	0.547895
13340168	AT1G14755	2.4431	2.28936	2.33993	2.52104	2.55798	2.32734	2.30327	2.40821	2.45017	2.34409	2.59577	2.14229	2.15835	2.41192	2.47485	2.60847	2.79179	2.41192	2.41192	2.26511	2.4587	2.25338	2.40285	2.56627	-0.284756	0.12256	0.134918	0.087429	0.233807	0.084579	-0.139832	0.118849	0.110238	-0.17695	0.03779	-0.185051	0.25357	-0.146808	-0.01615	-0.355089	-0.388942	0.154357	0.393402	-0.265657	-0.126388	-0.178139	-0.426732	0.339408
13340172	AT1G14780	7.27648	6.11861	5.72967	6.41382	6.04459	5.35763	7.4773	6.50591	6.00036	5.99032	5.92138	6.2561	7.66948	6.49987	6.46928	6.8554	6.85794	6.37733	7.56253	6.58137	6.77374	6.87718	6.87283	6.86935	0.393009	0.381261	0.739608	0.441579	0.813348	1.0197	0.200824	0.387298	0.270692	-0.423495	-0.123208	0.898473	-0.106954	0.081505	0.304463	0.021786	0.014893	0.49202	-0.307778	-0.305793	0.033771	0.445281	0.138101	-0.406453
13340182	AT1G14800	5.18858	4.93194	5.14919	5.2032	5.35686	4.86405	5.16538	4.82134	5.18611	4.71101	4.83977	5.38726	4.76057	4.74698	4.85059	4.88332	5.07757	5.10773	4.98419	4.70518	4.48829	4.84894	5.6952	4.66183	-0.428009	-0.18496	-0.298595	-0.319881	-0.279295	0.243682	-0.023198	-0.110607	0.036926	-0.492194	-0.517089	0.523213	0.223621	-0.041804	-0.362301	-0.034381	0.617627	-0.445903	0.246819	0.068803	-0.399227	0.457813	1.13472	-0.969116
13340190	AT1G14860	6.00967	5.49763	4.73131	5.30202	5.21792	5.11076	6.20001	5.69198	4.92867	5.79925	5.40807	4.47605	6.84766	6.06859	6.27099	6.11359	6.03945	5.99548	6.61154	6.35273	6.53112	6.54406	6.4013	5.48443	0.837991	0.570961	1.53968	0.811567	0.821526	0.884722	0.190341	0.194347	0.197363	0.497225	0.190149	-0.634709	-0.236115	0.284139	0.260127	0.430475	0.361848	-0.51105	-0.426456	0.089792	0.062764	-0.06675	0.171699	0.123659
13340196	AT1G14890	8.93559	8.5471	8.38714	8.4414	8.23708	7.80826	9.04562	8.60924	8.1765	8.23019	8.02978	7.43136	8.05516	8.07766	8.09944	8.15454	8.27829	7.88342	8.54661	8.40074	8.4011	8.3958	8.20035	7.58837	-0.880427	-0.469431	-0.287692	-0.286866	0.041208	0.075153	0.110033	0.062144	-0.210634	-0.21121	-0.207304	-0.376907	0.491446	0.323073	0.301658	0.241268	-0.077939	-0.295049	0.381413	0.260929	0.512292	0.452478	0.129365	0.081858
13340200	AT1G14920	8.35757	8.54891	8.54949	8.08814	8.20974	7.64072	8.30808	8.33202	8.34376	8.10229	7.70827	7.51991	8.20228	8.67221	8.77101	8.26269	8.3078	8.0901	8.12846	8.40127	8.39297	8.30501	8.12246	8.0291	-0.15529	0.123301	0.221518	0.174557	0.098051	0.449381	-0.049489	-0.21689	-0.205724	0.014158	-0.501475	-0.120812	-0.073823	-0.270942	-0.378037	0.042317	-0.185341	-0.061002	-0.024334	-0.054052	-0.172313	0.028159	0.316134	0.05981
13340204	AT1G15000	7.85527	7.48734	8.12514	8.33086	7.89805	7.69957	7.28904	7.101	7.755	8.39534	7.69106	6.87706	6.95714	7.30079	7.64694	8.01452	7.82087	7.96912	7.25127	7.34293	7.61742	8.13234	7.81441	7.69106	-0.898128	-0.186551	-0.478199	-0.31634	-0.07718	0.269548	-0.566236	-0.386345	-0.370139	0.064478	-0.206991	-0.82251	0.294132	0.042138	-0.02952	0.117818	-0.006461	-0.278055	0.860368	0.428483	0.340619	0.05334	0.20053	0.544455
13340207	AT1G15010	7.59598	6.98839	6.76227	6.48779	5.96013	4.66525	7.85788	7.37057	5.76541	6.20621	5.30672	5.37262	7.17106	6.84796	6.17614	5.95469	5.58514	5.80917	8.02749	7.0636	5.89335	6.89096	5.91667	5.42184	-0.424914	-0.140436	-0.586123	-0.533096	-0.37499	1.14392	0.261899	0.382179	-0.996855	-0.281583	-0.653403	0.707371	0.856421	0.215638	-0.282796	0.93627	0.331533	-0.387328	0.594522	-0.166541	0.714059	1.21785	0.984936	-1.0947
13340210	AT1G15015	2.01343	2.10641	2.12359	2.12202	2.49743	2.19069	2.11579	2.02373	2.13969	2.4951	2.30688	2.04928	2.47633	2.28391	2.31126	2.64534	2.39039	2.6518	2.37409	2.13335	2.21076	2.71583	2.28315	2.11552	0.462901	0.177498	0.187664	0.523316	-0.107042	0.461112	0.102358	-0.082683	0.016093	0.373081	-0.190546	-0.141415	-0.102246	-0.150563	-0.100495	0.070496	-0.107234	-0.536283	-0.204604	-0.06788	-0.116588	-0.302585	0.083312	-0.394868
13340214	AT1G15030	10.6616	10.4174	10.4887	10.7783	10.5445	10.5012	10.7411	10.4127	10.1416	10.7775	10.5482	10.4305	10.0163	9.53655	9.52926	10.0398	9.9169	9.96309	10.0853	9.84643	9.63299	10.1959	9.88637	9.95089	-0.64525	-0.880829	-0.959449	-0.73841	-0.627577	-0.53809	0.07953	-0.00467	-0.3471	-0.00074	0.00375	-0.07065	0.06896	0.309877	0.103734	0.156	-0.030529	-0.012199	-0.01057	0.314547	0.450834	0.15674	-0.034279	0.058451
13340222	AT1G15045	2.81633	3.11802	3.06591	2.90124	2.78187	3.7018	2.92605	2.81633	3.13529	3.10992	3.17329	3.18175	3.04718	2.64993	3.3648	2.89932	3.62697	3.13529	3.90525	3.25282	3.05362	3.35846	3.53481	3.39188	0.230843	-0.468089	0.298881	-0.001926	0.845102	-0.566513	0.109714	-0.30169	0.069372	0.208682	0.391419	-0.520045	0.858079	0.602882	-0.311174	0.459148	-0.092162	0.256591	0.748365	0.904572	-0.380546	0.250466	-0.483581	0.776636
13340224	AT1G15080	6.46803	6.02112	6.24154	7.65366	6.35036	6.61501	6.22114	6.19745	5.64875	7.06313	6.19566	5.60072	5.30028	5.40844	5.95542	6.2088	5.8425	5.95247	6.31708	4.68238	5.64056	5.81109	6.203	6.09376	-1.16775	-0.612685	-0.286125	-1.44486	-0.507859	-0.662538	-0.246894	0.176328	-0.592798	-0.59053	-0.154707	-1.01429	1.0168	-0.726062	-0.314857	-0.39771	0.360499	0.141294	1.2637	-0.90239	0.277941	0.19282	0.515206	1.15558
13340234	AT1G15110	8.34525	8.12316	7.96969	7.87152	8.0577	7.93963	8.45239	8.29236	8.09964	8.12338	8.04382	8.10087	8.18651	8.05785	7.97228	7.68138	7.95512	7.7538	8.74521	8.25314	8.15557	7.89981	7.87751	8.31174	-0.158738	-0.065311	0.002581	-0.190141	-0.102587	-0.185831	0.10714	0.169205	0.129945	0.251863	-0.013882	0.161233	0.55869	0.195291	0.183291	0.218431	-0.077606	0.557938	0.45155	0.026086	0.053346	-0.033432	-0.063724	0.396705
13340251	AT1G15120	10.5811	10.4967	10.2407	10.3427	10.0738	10.446	10.5135	10.3992	10.5426	10.4481	10.2372	10.4966	10.5568	10.459	10.5085	10.3183	10.3485	10.5506	10.7334	10.6491	10.5992	10.6577	10.5479	10.7333	-0.02427	-0.0377	0.26774	-0.02436	0.2748	0.10457	-0.06758	-0.09752	0.30185	0.10535	0.16342	0.05062	0.17657	0.19012	0.0907	0.33934	0.19936	0.18275	0.24415	0.28764	-0.21115	0.23399	0.03594	0.13213
13340261	AT1G15125	11.7413	11.4416	10.8043	10.861	10.4055	8.33304	11.7306	11.9138	11.595	11.3744	10.1045	9.05313	11.5504	11.35	10.9003	10.7261	9.73969	8.32811	11.683	11.7637	11.2379	11.3014	9.40444	8.75356	-0.19097	-0.09161	0.09594	-0.13486	-0.665838	-0.004933	-0.01074	0.47213	0.79062	0.5135	-0.30101	0.720093	0.13266	0.41366	0.33767	0.57534	-0.335248	0.425453	0.1434	-0.05847	-0.45295	0.06184	-0.034238	-0.29464
13340266	AT1G15150	4.2841	4.75676	4.84731	4.96033	5.39439	4.74721	4.70326	4.91174	4.81825	4.64546	5.5873	5.03224	5.5134	5.18977	4.5119	4.17726	6.03855	5.65625	5.22095	5.27751	5.38836	5.20659	5.34242	6.43002	1.2293	0.433009	-0.335406	-0.783068	0.644155	0.909041	0.419154	0.154975	-0.029064	-0.314873	0.192908	0.285033	-0.292448	0.087734	0.876458	1.02933	-0.696127	0.77377	-0.711602	-0.067241	0.905522	1.34421	-0.889035	0.488737
13340274	AT1G15160	5.03843	5.64507	5.97985	5.39645	5.38889	5.06507	5.20523	4.60789	5.74929	5.45828	5.31063	5.29223	5.86606	5.68852	5.55846	5.15018	5.62189	5.06801	5.43595	5.67765	6.08186	5.13231	4.81116	5.4175	0.827631	0.043449	-0.421389	-0.246276	0.233003	0.002938	0.166802	-1.03718	-0.230568	0.061827	-0.078255	0.22716	-0.430115	-0.010866	0.5234	-0.017871	-0.810725	0.349489	-0.596917	1.02631	0.753968	-0.079698	-0.73247	0.122329
13340280	AT1G15170	6.93808	6.19881	6.19388	7.13424	6.8937	6.3708	7.02355	6.65556	6.75947	7.33492	6.56672	6.18795	7.30109	6.6423	6.61131	7.85814	7.14124	7.0202	6.94525	6.78873	6.80625	7.70393	7.0625	7.20014	0.363007	0.443482	0.417432	0.723897	0.24754	0.649405	0.085473	0.456749	0.565593	0.200678	-0.326978	-0.182848	-0.355832	0.146435	0.194942	-0.154205	-0.078746	0.179936	-0.441305	-0.310314	-0.370651	-0.354883	0.248232	0.362784
13340288	AT1G15180	6.86577	6.79635	6.91509	6.85669	7.18438	6.76153	6.61672	6.70003	6.49467	6.88487	6.84463	6.20469	6.75174	6.78618	6.66818	6.83962	6.62072	6.60286	6.62618	6.75262	6.67581	6.80597	6.77857	6.25983	-0.114035	-0.010165	-0.246913	-0.017078	-0.563663	-0.158666	-0.249057	-0.096321	-0.420423	0.028173	-0.339749	-0.556838	-0.125557	-0.03356	0.007631	-0.033641	0.15785	-0.343029	0.1235	0.062761	0.428054	-0.061814	0.497599	0.213809
13340300	AT1G15190	5.98762	6.44937	6.0112	5.9812	6.03009	6.41107	6.22711	6.2386	5.9572	5.92511	6.10325	6.32621	6.63624	6.09386	6.53888	5.83292	6.31604	6.07232	7.13039	6.45889	6.46846	5.73493	6.59785	6.56856	0.648619	-0.355506	0.52768	-0.148278	0.285946	-0.338743	0.239492	-0.210764	-0.054003	-0.056086	0.073158	-0.084856	0.494147	0.36503	-0.070422	-0.097994	0.281808	0.496241	0.254655	0.575794	-0.016419	-0.041908	0.20865	0.581097
13340304	AT1G15215	7.27923	8.0287	7.9389	7.63986	7.95295	7.80429	7.52506	8.01563	8.19649	7.36556	7.98598	7.81898	7.6693	8.13105	7.93558	7.50056	7.63674	7.41246	7.39733	7.78137	8.06624	7.20596	7.4709	7.5868	0.390063	0.102357	-0.003322	-0.139296	-0.316209	-0.391823	0.245823	-0.01306	0.257589	-0.274293	0.033033	0.01469	-0.271962	-0.349678	0.130662	-0.294597	-0.165841	0.174333	-0.517785	-0.336618	-0.126927	-0.020304	-0.198874	0.159643
13340315	AT1G15240	9.71618	9.81902	9.76811	9.78876	9.86544	9.56759	9.75275	9.80045	9.77982	9.65863	9.81038	9.65854	9.81873	9.97646	9.89961	9.80274	9.97415	9.72044	9.91696	9.85525	9.89789	9.74579	9.8996	9.79577	0.102546	0.157444	0.131501	0.013983	0.108714	0.15285	0.03656	-0.018568	0.011706	-0.130133	-0.055059	0.090947	0.098234	-0.121209	-0.001719	-0.056955	-0.074551	0.075323	0.061674	-0.102641	-0.013425	0.073178	-0.019492	-0.015624
13340335	AT1G15260	8.93097	8.91831	9.11142	9.6123	9.47699	9.38659	8.73711	8.84694	9.07207	9.5396	9.17752	9.00502	8.93532	8.06052	9.26031	9.27842	9.45892	8.69842	8.22201	8.81997	9.28576	9.32399	9.03883	8.61749	0.004348	-0.857789	0.148888	-0.333884	-0.018074	-0.688172	-0.19386	-0.071371	-0.039351	-0.072701	-0.299473	-0.381572	-0.713313	0.759456	0.025445	0.045578	-0.420086	-0.080938	-0.519453	0.830827	0.064796	0.118279	-0.120613	0.300634
13340339	AT1G15280	10.6211	10.6581	10.684	10.7527	10.6371	10.6663	10.6565	10.663	10.6013	10.7365	10.7171	10.5947	10.6011	10.5902	10.6306	10.5738	10.6133	10.5724	10.6025	10.5873	10.5389	10.5964	10.6426	10.5586	-0.01994	-0.06784	-0.05347	-0.17885	-0.02384	-0.0939	0.03547	0.00495	-0.08275	-0.01612	0.07996	-0.07153	0.00133	-0.00295	-0.09164	0.02256	0.02934	-0.01381	-0.03414	-0.0079	-0.00889	0.03868	-0.05062	0.05772
13340351	AT1G15330	3.32225	3.19941	3.17411	3.21693	3.1692	3.1187	3.54757	3.67646	2.96396	3.18304	2.94419	3.14522	3.41707	2.9578	3.52086	3.1064	2.84691	3.26444	3.99983	3.06679	3.45791	3.39534	3.1086	2.99217	0.094822	-0.241613	0.346751	-0.110534	-0.322287	0.145736	0.225317	0.477047	-0.21015	-0.033898	-0.22501	0.026523	0.582763	0.108997	-0.062946	0.288941	0.261695	-0.272268	0.357446	-0.36805	0.147204	0.322839	0.486705	-0.298791
13340355	AT1G15360	2.78617	2.48144	2.83486	2.61818	3.11961	2.80722	2.9154	2.71306	2.89576	2.9504	2.56927	2.77408	2.82742	2.83584	2.89059	2.71594	3.25625	2.7066	3.01978	2.68874	2.80332	2.89822	2.61141	3.21197	0.041246	0.354402	0.055733	0.097754	0.13664	-0.100615	0.129229	0.231627	0.060894	0.332218	-0.550344	-0.033138	0.192361	-0.147098	-0.087278	0.182285	-0.644845	0.505372	0.063132	-0.378725	-0.148172	-0.149933	-0.094501	0.53851
13340360	AT1G15370	9.91191	9.76237	9.43959	9.53751	9.88352	9.78763	9.93478	9.67408	9.94994	9.63741	9.77827	9.89279	10.7069	10.668	10.5056	10.4915	10.5737	10.5044	10.8113	10.7783	10.6197	10.6977	10.6539	10.6825	0.795011	0.905617	1.06601	0.953978	0.690176	0.716759	0.022869	-0.088298	0.510351	0.099902	-0.105257	0.105155	0.10434	0.11029	0.11408	0.20618	0.08019	0.1781	0.081471	0.198588	-0.396271	0.106278	0.185447	0.072945
13340367	AT1G15380	6.12436	6.34318	5.85725	5.17796	6.89197	4.95729	6.42273	6.83523	6.42892	5.56583	5.87954	6.92314	5.57008	5.79159	6.1577	5.18794	6.87787	5.62819	6.37553	6.49467	6.30079	5.84707	5.43505	6.33928	-0.554276	-0.551596	0.300447	0.009976	-0.014095	0.670899	0.298375	0.492054	0.571669	0.387863	-1.01242	1.96585	0.805451	0.703086	0.143092	0.659128	-1.44282	0.711089	0.507076	0.211032	-0.428577	0.271265	-0.430398	-1.25476
13340374	AT1G15390	8.22417	7.91343	8.02696	8.10598	7.94121	8.02764	8.03556	8.01268	8.26987	8.08164	7.96661	7.66223	8.20887	8.19552	8.10986	8.10035	8.11934	8.46691	8.16623	8.20524	8.37596	8.14775	8.28623	8.20783	-0.015294	0.282092	0.082899	-0.005629	0.178124	0.439274	-0.18861	0.099249	0.242911	-0.024343	0.025397	-0.365407	-0.042648	0.009724	0.266098	0.047403	0.166896	-0.259082	0.145962	-0.089525	0.023187	0.071746	0.141499	0.106325
13340379	AT1G15410	9.53176	8.91399	8.91245	8.97414	9.30175	8.99364	9.49554	8.95035	8.90485	8.80068	8.96586	8.11493	9.44591	9.07494	8.89471	8.91007	9.23359	8.50133	9.18684	8.97157	8.90476	8.84015	8.86724	8.2142	-0.085851	0.160958	-0.017738	-0.064068	-0.068165	-0.492315	-0.036215	0.036364	-0.0076	-0.173455	-0.335892	-0.878709	-0.259068	-0.10337	0.010047	-0.069921	-0.366352	-0.287126	-0.222853	-0.139734	0.017647	0.103534	-0.03046	0.591583
13340385	AT1G15430	8.27803	8.06019	7.95561	8.04684	8.14943	7.82435	8.35781	8.08804	7.96483	8.26748	8.06581	8.36378	8.59047	8.24475	8.47733	8.63541	8.16906	8.20782	9.03135	8.55226	8.35492	8.65893	8.14326	8.65341	0.312437	0.184566	0.521714	0.58857	0.019633	0.383474	0.079785	0.027858	0.009217	0.220644	-0.083613	0.539433	0.440884	0.307506	-0.122406	0.023525	-0.025796	0.445587	0.361099	0.279648	-0.131623	-0.197119	0.057817	-0.093846
13340390	AT1G15470	7.8607	7.84741	7.85898	8.10457	7.89255	8.34944	7.82069	7.88084	7.70958	8.09034	7.99523	8.06613	7.89006	8.10173	8.18873	8.25882	7.80733	8.28745	8.08708	7.93308	8.06958	8.22323	7.92518	8.30363	0.02936	0.254324	0.329753	0.154258	-0.085217	-0.061997	-0.040007	0.033432	-0.149399	-0.014228	0.10268	-0.283313	0.197027	-0.168646	-0.119153	-0.035592	0.117848	0.016186	0.237034	-0.202078	0.030246	-0.021364	0.015168	0.299499
13340400	AT1G15480	8.05012	7.89406	8.14603	7.71204	6.98825	7.22949	7.80005	8.26784	8.02701	7.8019	7.44154	6.82501	8.42955	8.13683	7.90823	7.32403	6.92373	7.6986	7.95499	7.90078	7.9056	7.45664	7.21597	7.51512	0.379434	0.242777	-0.237804	-0.388012	-0.064518	0.469111	-0.250067	0.373785	-0.119021	0.089864	0.453292	-0.404481	-0.474561	-0.236054	-0.002628	0.132617	0.292241	-0.183479	-0.224494	-0.609839	0.116393	0.042753	-0.161051	0.221002
13340406	AT1G15500	9.7234	10.0282	10.0937	10.1295	9.83948	9.70628	9.7541	10.003	10.4773	10.1866	9.78589	9.4125	9.765	9.95796	10.0837	10.163	10.0509	9.98242	9.91344	10.1079	10.2078	10.3163	10.0401	9.8698	0.041602	-0.070286	-0.01003	0.03346	0.211392	0.276139	0.030705	-0.02523	0.38357	0.05708	-0.053593	-0.29378	0.148442	0.149926	0.12405	0.1534	-0.01073	-0.112615	0.117737	0.175156	-0.25952	0.09632	0.042863	0.181165
13340414	AT1G15510	8.883	9.39646	9.69449	9.4967	8.81251	8.88922	9.15095	9.71828	9.67056	9.38684	8.85687	8.49276	9.38427	9.43493	9.49686	9.36072	8.97874	9.3102	9.03222	9.01623	9.29959	9.14191	9.07565	9.17449	0.501268	0.038473	-0.197636	-0.135979	0.166233	0.420988	0.267951	0.32182	-0.023932	-0.109858	0.044363	-0.396454	-0.352045	-0.418699	-0.197268	-0.218816	0.09691	-0.13571	-0.619996	-0.740519	-0.173336	-0.108958	0.052547	0.260744
13340416	AT1G15540	4.41938	3.83393	3.51297	3.8768	3.67949	4.23402	3.89874	4.3193	3.61618	3.73636	3.51869	3.95927	4.05815	3.58799	3.76012	3.85331	3.67667	3.96828	4.54044	3.95357	3.8814	3.8479	3.59292	4.07504	-0.361234	-0.245941	0.247152	-0.023484	-0.002816	-0.265741	-0.520644	0.485368	0.103204	-0.140433	-0.160796	-0.274745	0.482294	0.365573	0.121272	-0.005408	-0.083753	0.106763	1.00294	-0.119795	0.018068	0.135025	0.077043	0.381508
13340420	AT1G15570	6.91269	6.85205	6.66586	6.8973	7.12061	7.01126	6.98051	6.62202	6.55628	6.43239	6.99227	6.68267	7.33244	7.05191	7.41876	7.22432	7.63332	7.243	7.21347	7.02218	7.22909	7.19651	7.50242	7.39119	0.419745	0.199856	0.752906	0.327018	0.512705	0.231735	0.067823	-0.230038	-0.109578	-0.464916	-0.128349	-0.328596	-0.118971	-0.029733	-0.189674	-0.027811	-0.130897	0.148194	-0.186794	0.200305	-0.080096	0.437105	-0.002548	0.47679
13340433	AT1G15590	3.66062	3.90308	3.89829	4.06626	4.2616	4.51492	3.76236	4.30982	4.00775	3.93751	3.94913	3.98889	3.80501	4.28934	4.15673	4.07819	3.74117	3.88472	3.99718	3.56314	3.7409	3.46414	4.43295	3.93147	0.144394	0.386264	0.258437	0.011931	-0.520431	-0.630199	0.101745	0.406741	0.109461	-0.128751	-0.312469	-0.526022	0.192166	-0.726205	-0.415831	-0.614055	0.691778	0.04675	0.090421	-1.13295	-0.525292	-0.485304	1.00425	0.572772
13340440	AT1G15600	3.48726	3.51414	3.72052	3.42767	3.1462	4.16828	3.36964	3.96568	3.01706	3.15953	3.41418	3.93267	3.58072	3.6862	3.38822	3.3137	3.23861	4.04254	3.18878	3.38822	3.25272	3.53065	3.47173	3.23437	0.093456	0.172064	-0.332307	-0.113968	0.09241	-0.125739	-0.117618	0.451538	-0.703467	-0.268138	0.267981	-0.235612	-0.391938	-0.297988	-0.135491	0.216952	0.233121	-0.808171	-0.27432	-0.749526	0.567976	0.48509	-0.03486	-0.572559
13340445	AT1G15610	2.6624	3.22443	3.98246	3.12328	2.62365	3.33611	3.24195	3.57831	3.34293	2.84041	2.93003	4.28671	2.92605	3.32761	2.67687	2.92605	2.67672	2.87949	2.94417	2.67419	2.6616	2.79709	2.68249	2.5627	0.263651	0.103175	-1.30559	-0.197237	0.05307	-0.456613	0.57956	0.353876	-0.639527	-0.282878	0.306384	0.950598	0.018123	-0.653424	-0.015273	-0.12896	0.005777	-0.31679	-0.561437	-1.0073	0.624254	0.153918	-0.300607	-1.26739
13340452	AT1G15620	3.29382	3.3003	3.52123	3.1998	4.07599	3.43486	3.31112	3.04093	3.18732	3.68155	3.12754	3.35534	3.57389	3.89941	3.32829	3.4114	2.68378	3.29382	3.1266	3.43024	3.14508	3.24247	3.18065	3.00926	0.280076	0.599107	-0.192943	0.211608	-1.39221	-0.141046	0.017297	-0.259378	-0.333913	0.481754	-0.948455	-0.079528	-0.447297	-0.469176	-0.183207	-0.16893	0.496868	-0.284559	-0.464594	-0.209798	0.150706	-0.650684	1.44532	-0.205031
13340457	AT1G15630	2.83062	3.67452	3.37341	3.21303	3.06521	3.18513	3.06315	3.20474	3.19385	3.07039	3.18777	3.97477	3.19385	2.65896	3.65002	3.05659	3.06555	3.79022	3.04455	2.93189	2.83014	3.69951	3.19833	3.61898	0.363221	-1.01556	0.276606	-0.156445	0.000333	0.605096	0.232528	-0.469779	-0.179567	-0.142641	0.122561	0.789641	-0.149296	0.27293	-0.819877	0.642921	0.132783	-0.171238	-0.381824	0.742709	-0.64031	0.785562	0.010222	-0.960879
13340463	AT1G15640	3.28936	2.75697	3.07643	2.98801	2.77927	2.78737	2.96544	2.7254	3.05222	2.85346	3.1318	2.93527	3.24587	3.11174	2.7082	3.05222	2.98317	3.07643	3.54506	2.86777	3.00355	3.07124	3.42873	2.89408	-0.043488	0.354773	-0.368229	0.064213	0.203899	0.289058	-0.323913	-0.031564	-0.024206	-0.134549	0.352527	0.1479	0.299191	-0.243968	0.295354	0.019014	0.445561	-0.182347	0.623104	-0.212404	0.31956	0.153563	0.093034	-0.330247
13340469	AT1G15660	8.47668	7.70509	7.98222	8.4137	8.14986	8.3269	8.17401	7.93388	7.60903	8.31826	8.26415	8.07261	8.09143	7.80425	7.88158	8.56366	8.18368	8.21727	8.01628	7.68989	8.06775	8.34294	8.18365	8.13515	-0.385249	0.099154	-0.100646	0.149961	0.033819	-0.109637	-0.302675	0.228787	-0.373188	-0.095435	0.114289	-0.254296	-0.075154	-0.114361	0.18617	-0.220715	-2.7e-05	-0.082119	0.227521	-0.343148	0.559358	-0.12528	-0.114316	0.172177
13340483	AT1G15670	9.74418	8.92325	8.73565	8.51623	7.88699	7.13975	9.79203	9.47898	9.32191	8.2808	8.05576	8.3825	8.80497	8.98823	8.99387	8.24243	8.27828	7.73596	8.90055	9.1548	9.33655	8.19562	7.8546	7.82983	-0.939217	0.064979	0.258217	-0.273795	0.391294	0.596211	0.047842	0.555732	0.586253	-0.235429	0.168774	1.24275	0.095583	0.166572	0.342676	-0.046814	-0.423686	0.09387	0.047741	-0.38916	-0.243577	0.188615	-0.59246	-1.14888
13340487	AT1G15680	3.51237	3.8096	3.56494	3.85537	3.43727	3.73841	3.70506	3.55174	3.58256	3.76961	3.37492	3.32878	3.49675	3.48028	3.64538	3.29596	3.56061	3.47886	3.59826	3.50271	3.70556	3.88253	3.43111	3.3775	-0.015628	-0.329319	0.080434	-0.559404	0.123338	-0.259548	0.192691	-0.257857	0.017621	-0.085753	-0.062356	-0.409624	0.101511	0.022429	0.060184	0.586564	-0.129495	-0.101356	-0.09118	0.280286	0.042563	0.672317	-0.067139	0.308268
13340489	AT1G15690	11.6109	11.5974	11.6723	11.7224	11.4374	11.4763	11.5295	11.4933	11.6555	11.7432	11.4231	11.4345	11.6421	11.5217	11.7113	11.6619	11.4604	11.6209	11.6205	11.5282	11.4254	11.635	11.488	11.5743	0.03121	-0.07573	0.03905	-0.06049	0.02304	0.14453	-0.08142	-0.10408	-0.01675	0.02081	-0.01424	-0.04186	-0.02155	0.00657	-0.28593	-0.02685	0.02757	-0.04661	0.05987	0.11065	-0.26918	-0.04766	0.04181	-0.00475
13340503	AT1G15710	7.18639	7.22839	7.43749	7.34213	7.60561	7.97404	7.39956	7.45703	7.48377	7.16154	7.49002	7.92285	6.90761	7.11489	7.34038	6.80286	7.28757	7.40151	7.27155	6.94139	7.24904	6.9275	7.30503	7.48157	-0.278776	-0.113501	-0.09711	-0.539279	-0.318033	-0.572532	0.213174	0.228641	0.046273	-0.180597	-0.115589	-0.051195	0.363943	-0.173505	-0.09134	0.12464	0.01746	0.080063	0.150769	-0.402146	-0.137613	0.305237	0.133049	0.131258
13340507	AT1G15720	6.07888	5.98283	6.05843	5.96071	5.66566	6.0087	5.90811	5.99759	5.807	5.90798	5.92533	5.75704	5.73684	5.24506	5.40809	5.23025	5.63216	5.49072	5.98048	5.39266	5.23822	5.18222	5.4452	5.37003	-0.342033	-0.737769	-0.650342	-0.730465	-0.033505	-0.517981	-0.170763	0.014766	-0.251429	-0.052727	0.259662	-0.251658	0.243638	0.147606	-0.169861	-0.048025	-0.186962	-0.120683	0.414401	0.13284	0.081568	0.004702	-0.446624	0.130975
13340511	AT1G15740	10.8388	10.6554	10.4495	10.4054	10.8882	10.6511	10.9244	10.7203	10.4578	10.3408	10.7355	10.6423	10.849	10.8826	10.695	10.7052	11.094	10.7965	10.9053	10.8292	10.4969	10.695	10.9157	10.6875	0.01018	0.22713	0.24549	0.29976	0.20583	0.14541	0.08565	0.06492	0.00834	-0.0646	-0.15263	-0.00888	0.05628	-0.05339	-0.19802	-0.01014	-0.17832	-0.10902	-0.02937	-0.11831	-0.20636	0.05446	-0.02569	-0.10014
13340529	AT1G15760	4.81254	5.50815	5.81408	5.86229	6.17839	6.73407	5.20142	5.13521	5.2995	5.4804	5.81719	5.82841	5.58337	5.5749	6.13683	5.88932	6.65579	6.31011	5.42569	5.29196	5.84334	6.01615	6.30165	6.04676	0.770824	0.066755	0.32275	0.027028	0.4774	-0.423959	0.388874	-0.372935	-0.514583	-0.381894	-0.361204	-0.905658	-0.157674	-0.282948	-0.29349	0.126833	-0.354142	-0.263346	-0.546548	0.089987	0.221093	0.508727	0.007062	0.642312
13340531	AT1G15810	8.7212	8.48684	8.75816	8.49952	8.45789	8.24394	8.53429	8.66571	8.61335	8.32858	8.41474	8.5481	8.66192	8.74111	8.7322	8.64498	8.60521	8.61713	8.49578	8.85864	8.93775	8.51627	8.59833	8.62168	-0.059283	0.254272	-0.025968	0.145464	0.14732	0.373187	-0.186916	0.178874	-0.144819	-0.170938	-0.043152	0.30416	-0.166144	0.117534	0.205557	-0.128712	-0.006883	0.004551	0.020772	-0.06134	0.350376	0.042226	0.036269	-0.299609
13340539	AT1G15830	8.18983	8.3056	7.23685	5.37326	8.95064	8.22518	8.44742	7.75873	6.92518	5.7288	8.57359	7.25197	8.84813	8.5038	8.04615	5.46103	8.94873	8.08595	8.4969	8.33221	7.66999	5.25598	8.73551	7.2567	0.658308	0.198204	0.809299	0.087766	-0.001911	-0.139234	0.257593	-0.546863	-0.311677	0.355537	-0.377049	-0.973208	-0.35124	-0.17159	-0.376164	-0.205043	-0.213223	-0.829252	-0.608833	0.375273	-0.064487	-0.56058	0.163826	0.143956
13340541	AT1G15840	4.47947	3.81265	3.64576	4.16641	3.93279	3.93556	4.16059	4.0677	3.8711	3.86386	3.69976	3.79805	4.6376	4.37123	4.55955	4.63702	3.96208	4.3485	4.5644	3.85027	4.43514	4.29973	4.69278	3.93316	0.158135	0.55858	0.913783	0.470603	0.029288	0.412937	-0.318877	0.255045	0.225338	-0.302556	-0.233031	-0.137515	-0.073196	-0.520964	-0.124404	-0.337283	0.730707	-0.415339	0.245681	-0.776009	-0.349742	-0.034727	0.963738	-0.277824
13340546	AT1G15860	8.52341	8.59163	8.74347	8.59894	8.8191	8.97113	8.69737	8.42345	8.74217	8.75616	8.84305	9.20253	8.95558	9.10218	8.89496	9.1393	9.15428	9.1341	8.99957	9.13404	8.67487	9.0923	9.159	9.08612	0.432168	0.510548	0.151498	0.540357	0.335185	0.162978	0.173956	-0.168184	-0.001293	0.157224	0.023951	0.231404	0.043992	0.031862	-0.220093	-0.046997	0.004714	-0.047986	-0.129964	0.200046	-0.2188	-0.204221	-0.019237	-0.27939
13340560	AT1G15870	6.52254	6.36266	6.4503	6.181	5.3259	5.2738	6.21948	6.17127	6.79132	6.14256	6.09363	5.35416	8.613	8.4628	8.41726	8.3574	7.97006	8.24275	8.20027	8.69572	8.69765	8.49423	7.9701	8.49751	2.09047	2.10013	1.96696	2.1764	2.64416	2.96895	-0.303055	-0.19139	0.341019	-0.038436	0.76773	0.080363	-0.412737	0.232923	0.280389	0.136826	3.5e-05	0.254761	-0.109682	0.424313	-0.06063	0.175262	-0.767695	0.174398
13340566	AT1G15885	6.66569	6.97961	6.88692	7.07026	6.62775	6.84063	6.38086	6.66576	6.60885	6.8388	6.62331	5.77737	3.91767	3.95334	3.52763	3.29348	3.66594	3.38758	3.5012	3.42408	3.24884	3.73611	3.43922	3.54417	-2.74802	-3.02627	-3.35929	-3.77678	-2.96181	-3.45305	-0.284836	-0.313842	-0.278071	-0.231455	-0.004435	-1.06326	-0.416474	-0.52925	-0.278798	0.442638	-0.22672	0.156593	-0.131638	-0.215408	-0.000727	0.674093	-0.222285	1.21986
13340571	AT1G15890	6.13283	5.73863	6.12538	5.95695	5.74928	5.95277	5.97183	6.04441	5.80778	6.38851	5.79398	5.78664	3.63525	3.06453	3.06035	3.4097	2.78512	2.69411	2.9752	3.4728	3.30226	3.12743	2.76244	2.96769	-2.49758	-2.6741	-3.06504	-2.54725	-2.96415	-3.25866	-0.161004	0.305782	-0.317602	0.431566	0.0447	-0.166132	-0.660051	0.408269	0.241914	-0.282272	-0.02268	0.273581	-0.499047	0.102487	0.559516	-0.713838	-0.06738	0.439713
13340575	AT1G15900	5.63791	5.6358	5.17102	5.61908	5.65187	5.35644	5.67846	6.26295	5.59881	5.53084	5.66681	5.57979	6.76267	6.50384	6.53975	6.04366	5.65985	5.85663	6.62228	6.05803	6.30373	6.39171	5.76371	5.44082	1.12476	0.868033	1.36872	0.424584	0.007982	0.500185	0.04055	0.627142	0.427788	-0.088245	0.014945	0.223345	-0.140395	-0.445808	-0.236018	0.348049	0.103866	-0.415809	-0.180945	-1.07295	-0.663806	0.436294	0.088921	-0.639154
13340577	AT1G15910	8.45254	8.29033	8.53306	8.53364	8.48929	8.00113	8.31736	8.17129	8.0902	8.91638	7.77266	7.69754	8.07974	6.90149	8.09528	8.39036	8.15024	7.45758	7.54156	7.85866	7.98677	8.16067	8.30764	7.97794	-0.372797	-1.38883	-0.437774	-0.143286	-0.339047	-0.543547	-0.135174	-0.119041	-0.442857	0.382734	-0.716622	-0.303593	-0.538175	0.957161	-0.108509	-0.229688	0.157405	0.520357	-0.403001	1.0762	0.334348	-0.612422	0.874027	0.82395
13340583	AT1G15920	7.13476	6.90267	6.96985	7.29972	7.00976	6.79899	7.21267	6.98468	7.2621	7.32614	6.99233	6.70649	7.4162	7.47442	7.38291	7.76053	7.41044	7.03472	7.54189	7.42903	7.29627	7.69581	7.44566	7.22715	0.281438	0.571751	0.41306	0.46081	0.400683	0.235723	0.077906	0.082004	0.292252	0.026421	-0.017424	-0.092504	0.125687	-0.045393	-0.08663	-0.064716	0.035221	0.192433	0.047781	-0.127397	-0.378882	-0.091137	0.052645	0.284937
13340590	AT1G15930	10.4302	10.6344	10.5684	10.5842	10.345	10.5862	10.5026	10.4852	10.674	10.57	10.49	10.4505	10.5286	10.473	10.5304	10.5123	10.4568	10.6141	10.5384	10.4883	10.5144	10.5232	10.4384	10.6085	0.09835	-0.16144	-0.03803	-0.07196	0.11181	0.0279	0.07235	-0.14919	0.10558	-0.0142	0.14494	-0.1357	0.00987	0.01534	-0.01592	0.01092	-0.01844	-0.00558	-0.06248	0.16453	-0.1215	0.02512	-0.16338	0.13012
13340598	AT1G15940	9.56846	9.45514	9.61561	9.47492	9.51227	9.2861	9.5832	9.44985	9.49423	9.45817	9.42064	9.16185	9.77932	9.79848	9.73571	9.79655	9.8369	9.75273	9.68916	9.73796	9.71857	9.8414	9.66173	9.7438	0.210866	0.343348	0.120101	0.321638	0.324625	0.466627	0.014743	-0.005285	-0.121381	-0.016747	-0.091628	-0.124256	-0.090158	-0.060525	-0.017136	0.044842	-0.175165	-0.008934	-0.104901	-0.05524	0.104245	0.061589	-0.083537	0.115322
13340615	AT1G15950	9.95376	9.70135	9.33871	9.80331	10.4885	10.5438	10.0279	9.73396	9.56666	9.84115	10.4174	10.5727	9.80195	9.7493	9.57358	9.84852	10.337	10.4628	10.0152	9.96825	9.69075	10.2117	10.4026	10.5829	-0.151808	0.047948	0.234867	0.045213	-0.15143	-0.08098	0.074091	0.032611	0.227943	0.037842	-0.07108	0.0289	0.213279	0.218952	0.117171	0.36319	0.06553	0.12006	0.139188	0.186341	-0.110772	0.325348	0.13661	0.09116
13340626	AT1G15980	10.5776	10.4843	10.767	10.537	11.1831	11.1301	10.5357	10.3041	10.7568	10.5212	11.0179	10.603	10.5258	10.4384	10.6297	10.4972	10.9639	10.9967	10.3252	10.2836	10.6985	10.4725	10.8644	10.731	-0.05175	-0.04583	-0.13731	-0.03986	-0.21917	-0.13343	-0.04182	-0.18015	-0.01021	-0.01581	-0.16517	-0.52712	-0.2006	-0.15484	0.06879	-0.02465	-0.09958	-0.2657	-0.15878	0.02531	0.079	-0.00884	0.06559	0.26142
13340635	AT1G16000	9.75646	9.87974	9.91202	9.59927	9.37258	9.5166	9.57457	9.88226	9.96777	9.35409	9.63769	9.58471	9.64252	9.80662	9.77739	9.24214	9.06727	9.57286	9.78882	9.91718	9.72445	9.08311	9.33033	9.86639	-0.113933	-0.073119	-0.134635	-0.357137	-0.305304	0.056262	-0.181889	0.00252	0.055741	-0.245179	0.265113	0.068117	0.146295	0.110568	-0.052936	-0.159023	0.263057	0.293533	0.328184	0.108048	-0.108677	0.086156	-0.002056	0.225416
13340640	AT1G16020	6.87272	6.86627	7.29691	7.22071	7.47794	7.6095	6.86306	7.04757	7.23522	7.42776	7.43583	7.11431	6.62219	7.18875	7.23522	7.40681	7.54817	7.56014	6.87861	6.75634	7.33168	7.33422	7.50526	7.43544	-0.250533	0.322482	-0.061683	0.1861	0.07023	-0.049354	-0.009664	0.181294	-0.061683	0.207048	-0.042109	-0.495183	0.256423	-0.432414	0.096454	-0.072592	-0.042915	-0.124705	0.266087	-0.613708	0.158137	-0.27964	-0.000806	0.370478
13340652	AT1G16025	5.7159	5.94482	5.54911	6.23851	6.10018	5.84523	5.62089	5.67604	5.10634	6.12953	5.39669	5.62758	5.44859	5.60626	5.7409	5.81831	5.7054	5.64173	6.26279	5.49639	5.7194	5.82971	5.74828	5.38819	-0.267313	-0.33856	0.191789	-0.420196	-0.394782	-0.203496	-0.095016	-0.268772	-0.442768	-0.10898	-0.703498	-0.217652	0.814204	-0.109864	-0.021502	0.011399	0.04288	-0.253543	0.90922	0.158908	0.421266	0.120379	0.746378	-0.035891
13340655	AT1G16040	9.45189	9.37043	9.43324	9.34475	9.23746	9.48527	9.50918	9.54138	9.49405	9.28968	9.48673	9.65529	9.2138	9.27065	9.14372	9.10011	9.25639	9.27784	9.40242	9.52805	9.56907	9.28963	9.42425	9.42093	-0.238085	-0.099781	-0.289523	-0.24464	0.01893	-0.207423	0.057296	0.17095	0.060805	-0.055071	0.249275	0.170026	0.188621	0.257404	0.425348	0.189519	0.16786	0.14309	0.131325	0.086454	0.364543	0.24459	-0.081415	-0.026936
13340665	AT1G16060	4.33251	4.74499	4.11253	4.41936	4.816	5.74021	4.34957	4.40536	4.66523	4.53162	5.68583	5.85552	5.0705	5.13361	4.57376	5.27011	5.90636	5.96642	4.56006	5.14473	5.15586	5.81681	5.72732	6.17059	0.737992	0.388614	0.461227	0.850749	1.09036	0.226208	0.017065	-0.339635	0.552695	0.112264	0.869832	0.115315	-0.51044	0.011125	0.582105	0.546702	-0.179039	0.204176	-0.527505	0.35076	0.02941	0.434438	-1.04887	0.088861
13340676	AT1G16080	9.74537	9.79846	10.1842	9.76088	10.2857	10.2633	9.67456	9.60186	10.0663	9.56564	10.0991	9.86318	9.20847	9.03416	9.43776	9.10126	9.67401	9.6877	9.1686	8.98084	9.56564	9.11303	9.56564	9.54878	-0.536904	-0.764301	-0.746456	-0.659624	-0.611724	-0.575589	-0.07081	-0.196604	-0.11787	-0.195238	-0.18665	-0.400112	-0.039866	-0.053322	0.12788	0.011767	-0.108362	-0.138925	0.030944	0.143282	0.24575	0.207005	0.078288	0.261187
13340684	AT1G16090	7.95896	7.22938	7.5003	8.38296	7.88902	7.65656	8.45583	7.73248	8.00211	8.78307	7.62678	7.90111	8.59938	7.65624	7.77885	8.73363	7.96007	8.42705	9.23217	8.6122	8.38969	9.01804	8.17781	8.41052	0.640416	0.426857	0.278553	0.350676	0.071049	0.770486	0.496871	0.503103	0.501811	0.400108	-0.262244	0.244548	0.632788	0.95596	0.610841	0.284407	0.21774	-0.016531	0.135917	0.452857	0.10903	-0.115701	0.479984	-0.261079
13340690	AT1G16110	10.0434	9.72947	9.38028	8.81636	9.41073	9.1298	10.0545	9.80709	9.47724	9.0262	9.76246	9.83053	9.71077	9.61133	9.66286	9.0343	9.36674	9.24689	9.60828	9.8966	9.80897	8.87414	9.40685	8.92403	-0.332666	-0.118143	0.282577	0.217947	-0.043987	0.117087	0.01105	0.077624	0.096959	0.20984	0.351735	0.700728	-0.102495	0.285273	0.146109	-0.160162	0.040108	-0.32286	-0.113545	0.207649	0.04915	-0.370002	-0.311627	-1.02359
13340695	AT1G16120	4.33847	4.40892	3.36866	3.44631	3.74259	3.54165	3.76525	4.04378	3.45471	3.79428	3.47807	3.8106	3.64232	3.64232	3.83676	4.32027	3.82659	3.55925	3.86301	4.00348	3.54484	3.36866	3.35279	3.58132	-0.696148	-0.766596	0.468094	0.873959	0.083995	0.017604	-0.573215	-0.365143	0.086044	0.347964	-0.26452	0.268953	0.220691	0.361155	-0.291914	-0.95161	-0.473802	0.022069	0.793906	0.726298	-0.377958	-1.29957	-0.209282	-0.246884
13340699	AT1G16130	7.37167	6.59435	5.83198	6.26183	5.88417	5.58559	7.65694	6.35442	6.1149	6.83573	6.05521	5.85631	3.85407	3.73787	4.01029	3.88174	3.29848	4.3354	3.96713	4.07109	3.95901	3.92995	3.58015	3.40959	-3.51761	-2.85648	-1.82169	-2.3801	-2.58568	-1.25019	0.285266	-0.239926	0.282914	0.573896	0.171042	0.27072	0.113064	0.333224	-0.051278	0.048211	0.281665	-0.925807	-0.172202	0.57315	-0.334192	-0.525685	0.110623	-1.19653
13340705	AT1G16150	4.56997	4.90451	4.41432	5.08688	4.77656	4.96373	4.88013	5.53997	5.62957	4.5081	4.90358	4.04573	6.36919	7.22088	7.80828	7.28974	8.02813	7.2915	7.84872	7.68074	7.6065	7.54971	7.93095	7.58184	1.79922	2.31637	3.39396	2.20286	3.25157	2.32777	0.310161	0.635466	1.21525	-0.57878	0.127025	-0.917995	1.47953	0.459864	-0.201781	0.259971	-0.097184	0.290343	1.16936	-0.175602	-1.41703	0.838751	-0.224209	1.20834
13340709	AT1G16160	4.10778	5.23159	4.62561	5.23159	4.42559	5.0911	5.23159	6.30177	4.31724	4.97083	4.40389	5.55483	5.36358	5.25593	5.5664	5.87171	5.76339	5.21191	5.26609	5.20932	5.66979	5.53709	5.50566	5.23159	1.2558	0.02434	0.940795	0.640123	1.3378	0.120805	1.12381	1.07018	-0.308368	-0.26076	-0.021705	0.46372	-0.097493	-0.046609	0.103393	-0.334627	-0.25773	0.01968	-1.22131	-1.11679	0.411761	-0.073867	-0.236025	-0.44404
13340713	AT1G16180	10.6712	10.7914	10.6038	10.6231	10.5945	10.5423	10.7139	10.8552	10.7654	10.5948	10.7454	10.856	10.8793	10.8287	10.8515	10.7129	10.8274	10.8889	11.0691	10.998	10.9284	10.9095	10.7658	11.0113	0.20812	0.03735	0.24777	0.08988	0.23289	0.3466	0.04271	0.06379	0.1616	-0.02827	0.15087	0.3137	0.18973	0.16927	0.07685	0.19656	-0.06164	0.12244	0.14702	0.10548	-0.08475	0.22483	-0.21251	-0.19126
13340723	AT1G16190	8.22048	8.17316	8.32781	8.40649	8.29375	8.47894	8.27459	8.16628	8.13891	8.27428	8.1425	8.17699	8.28154	8.19761	8.07225	8.35238	8.29484	8.47524	7.83806	7.99074	8.37005	8.03755	8.21318	8.46532	0.061062	0.024454	-0.25556	-0.054111	0.00109	-0.003699	0.054109	-0.006881	-0.188898	-0.132213	-0.151245	-0.301949	-0.44348	-0.206874	0.297796	-0.314832	-0.081654	-0.009922	-0.497589	-0.199993	0.486694	-0.182619	0.069591	0.292027
13340737	AT1G16220	6.3488	5.84096	6.03168	6.10657	5.83312	6.29431	5.9893	5.52297	6.21687	6.39799	6.3488	5.47062	6.71774	5.86681	6.87692	6.83567	6.6939	6.34572	6.71255	6.0278	7.01873	7.27549	6.29603	6.41712	0.368933	0.025857	0.845237	0.729101	0.860774	0.051412	-0.359503	-0.31799	0.185191	0.291414	0.515683	-0.823689	-0.005187	0.160984	0.141808	0.439818	-0.397864	0.071395	0.354316	0.478974	-0.043383	0.148404	-0.913547	0.895084
13340743	AT1G16250	8.678	8.64695	8.47414	8.81499	8.52475	8.48282	8.60388	8.54889	8.29422	8.81034	8.48265	8.40846	8.72922	8.33334	8.57525	8.79678	8.65872	8.50622	8.54796	8.50313	8.19092	8.92611	8.47514	8.49889	0.051222	-0.313607	0.101116	-0.018211	0.133974	0.023406	-0.074121	-0.098056	-0.179915	-0.004646	-0.042093	-0.074362	-0.181259	0.169785	-0.384338	0.129329	-0.183582	-0.007336	-0.107138	0.267841	-0.204423	0.133975	-0.141489	0.067026
13340748	AT1G16270	8.1003	7.57684	7.68212	7.45976	7.83626	7.72062	7.82116	7.83424	7.64215	7.52177	8.00896	7.96117	7.85192	7.69576	7.62702	7.47994	7.60762	7.8208	7.77377	7.73949	7.78974	7.37428	7.96915	7.88752	-0.248371	0.118919	-0.055099	0.020174	-0.228641	0.10018	-0.279135	0.257399	-0.039973	0.06201	0.172706	0.240557	-0.078157	0.043724	0.162712	-0.105657	0.361534	0.066723	0.200978	-0.213675	0.202685	-0.167667	0.188828	-0.173834
13340759	AT1G16300	6.37744	5.49766	5.45521	5.50101	6.07545	6.46753	6.03596	5.63113	5.23046	5.6172	6.23393	6.57269	6.82042	5.70758	5.87557	5.90833	6.31931	6.27859	6.79868	6.08081	6.11537	6.54837	6.4204	7.11102	0.442976	0.209922	0.420361	0.407317	0.243861	-0.188937	-0.341481	0.133477	-0.224751	0.116185	0.158474	0.105161	-0.021743	0.373232	0.239806	0.640041	0.101082	0.83243	0.319738	0.239755	0.464557	0.523856	-0.057392	0.727269
13340775	AT1G16310	5.62105	5.90618	6.03794	6.59332	6.15113	6.07212	6.15422	6.07369	5.36094	6.10416	6.34238	5.63121	5.7835	6.16553	6.09533	6.19037	6.127	6.3729	5.54535	6.27628	6.04635	6.56764	5.83507	6.57102	0.162449	0.259345	0.057386	-0.402945	-0.024132	0.300781	0.533171	0.167505	-0.677002	-0.489162	0.191246	-0.440906	-0.238145	0.110751	-0.048983	0.377263	-0.291925	0.198127	-0.771316	-0.056754	0.628019	0.866425	-0.483171	0.639033
13340783	AT1G16320	8.86918	9.02818	9.3846	9.33651	9.25556	9.33733	8.91104	9.12839	9.36851	9.50285	9.24091	9.3142	8.87551	9.2015	9.32273	9.60853	9.51513	9.4541	9.07501	9.24915	9.40616	9.65356	9.39284	9.38759	0.006329	0.173322	-0.061871	0.272026	0.259566	0.116769	0.041867	0.100212	-0.01609	0.166342	-0.01465	-0.023135	0.1995	0.047644	0.083428	0.045025	-0.12229	-0.066513	0.157633	-0.052568	0.099518	-0.121317	-0.10764	-0.043378
13340788	AT1G16350	9.53832	9.69362	9.73539	9.14549	9.41288	9.55515	9.49569	9.62059	9.68417	9.12255	9.506	9.38194	9.43787	9.64234	9.58335	9.10428	9.34933	9.57848	9.48785	9.61495	9.77846	8.96935	9.45591	9.67909	-0.100447	-0.051284	-0.15204	-0.041205	-0.063552	0.023332	-0.042632	-0.073026	-0.051218	-0.022938	0.093111	-0.173214	0.049981	-0.027383	0.195115	-0.134927	0.106577	0.100605	0.092613	0.045643	0.246333	-0.111989	0.013466	0.273819
13340795	AT1G16370	5.07983	5.53078	5.0619	5.28176	5.00238	4.53681	5.05231	5.13837	5.15571	4.68533	5.05419	5.40702	5.13836	5.08979	5.34015	5.44204	5.48196	5.29745	5.3479	4.694	5.32349	5.49021	5.7382	5.43457	0.058531	-0.440994	0.278246	0.160278	0.479582	0.760638	-0.027526	-0.392409	0.093806	-0.596429	0.051817	0.870216	0.209535	-0.395787	-0.016656	0.048171	0.256244	0.137126	0.237061	-0.003378	-0.110462	0.6446	0.204427	-0.73309
13340799	AT1G16390	7.83557	7.75267	7.95562	7.99828	8.31375	8.14689	8.11599	7.33655	7.25552	7.8387	7.97263	6.76959	6.80617	7.00842	7.14733	7.19844	7.82955	7.18798	6.99849	6.39768	6.83001	7.03747	7.73498	7.06844	-1.02939	-0.744252	-0.808291	-0.799839	-0.484195	-0.958912	0.280425	-0.416114	-0.700097	-0.159578	-0.341116	-1.37731	0.192318	-0.61074	-0.317317	-0.160977	-0.094576	-0.119539	-0.088107	-0.194626	0.38278	-0.001399	0.24654	1.25777
13340802	AT1G16400	4.83151	4.85754	5.2078	5.7533	6.37698	6.4656	4.57871	5.32573	5.95356	5.92365	6.77035	6.65704	5.45594	6.5894	6.33312	6.57192	7.49487	7.09178	6.12745	6.73061	6.70787	6.93538	7.39444	7.18118	0.624436	1.73186	1.12532	0.818618	1.11789	0.62618	-0.252801	0.468193	0.745764	0.170348	0.393366	0.191437	0.671502	0.14121	0.37475	0.363462	-0.100434	0.089401	0.924303	-0.326983	-0.371014	0.193114	-0.4938	-0.102036
13340808	AT1G16410	4.14492	3.76046	4.83804	5.19672	6.4904	6.88507	3.40365	4.31176	5.06607	5.32833	6.83532	7.01852	4.46661	5.1756	5.00428	5.49633	7.03624	6.98602	4.42635	4.61078	5.19102	6.33118	6.81652	6.93849	0.321691	1.41514	0.166243	0.299616	0.545842	0.100951	-0.741273	0.551298	0.228026	0.131613	0.344924	0.13345	-0.040265	-0.56482	0.186735	0.834851	-0.219724	-0.047537	0.701008	-1.11612	-0.041291	0.703238	-0.564648	-0.180987
13340815	AT1G16430	4.85659	4.60378	4.19968	4.70376	4.22065	4.92259	4.99448	4.62445	5.21981	4.64083	4.54641	4.60509	4.60817	4.65063	5.01874	3.97778	4.1567	4.48042	3.98693	4.32248	4.09647	4.11961	4.08103	4.30441	-0.248421	0.046842	0.819065	-0.725981	-0.063953	-0.442167	0.137893	0.020669	1.02013	-0.062925	0.325761	-0.317499	-0.621238	-0.328142	-0.922268	0.141829	-0.075674	-0.176016	-0.759131	-0.348811	-1.9424	0.204754	-0.401435	0.141483
13340820	AT1G16440	4.11894	3.83011	3.79428	3.94661	4.25216	3.95433	4.34939	4.20437	4.06975	4.31763	4.20389	4.14336	4.04785	4.49223	4.26907	4.46392	3.97922	4.02921	4.11916	4.05544	4.16004	4.24007	4.16189	4.02262	-0.071092	0.662125	0.474796	0.517304	-0.272948	0.074885	0.230454	0.374256	0.275471	0.371013	-0.048273	0.18903	0.071312	-0.436796	-0.109034	-0.223852	0.182673	-0.006587	-0.159142	-0.811052	-0.384505	-0.594865	0.230946	-0.195617
13340826	AT1G16445	9.27541	8.44667	8.28471	8.66407	8.25752	8.17951	9.0607	8.33377	8.44612	8.45551	7.64238	7.36983	9.64983	8.58722	8.31229	8.82658	8.28324	8.69199	9.39777	8.97151	8.83698	8.94914	8.22899	8.52555	0.374426	0.140549	0.027578	0.162505	0.025724	0.512481	-0.21471	-0.112899	0.161405	-0.20856	-0.615136	-0.809686	-0.252068	0.384291	0.524688	0.122558	-0.054248	-0.166441	-0.037358	0.49719	0.363283	0.331118	0.560888	0.643245
13340834	AT1G16470	9.69732	9.59465	9.60035	9.28004	9.50809	9.37898	9.62281	9.6461	9.6117	9.26001	9.36895	9.71545	9.86446	9.71248	9.6105	9.28762	9.42848	9.76578	9.92697	10.0204	9.7984	9.55536	9.64753	9.90683	0.16714	0.117823	0.010144	0.00758	-0.079606	0.386797	-0.074511	0.051442	0.011351	-0.020035	-0.139136	0.336472	0.062515	0.307883	0.187906	0.267737	0.219046	0.141054	0.137026	0.256441	0.176555	0.287772	0.358182	-0.195418
13340849	AT1G16490	6.93809	6.87929	7.2421	6.91864	7.1907	6.83313	7.1042	7.24556	7.01189	6.89837	7.00526	7.19992	6.67134	7.00557	6.7112	6.63946	7.27518	6.89837	6.45313	6.59036	7.06758	6.84908	6.61336	6.66319	-0.266748	0.126287	-0.5309	-0.279174	0.084483	0.065247	0.16611	0.366276	-0.230203	-0.02026	-0.185441	0.366794	-0.218209	-0.415215	0.356383	0.209622	-0.661823	-0.235183	-0.384319	-0.781491	0.586586	0.229882	-0.476382	-0.601977
13340854	AT1G16500	7.50337	6.79111	7.05913	7.81748	7.7033	7.73629	7.26501	6.80423	7.06663	7.92534	7.95401	8.455	7.33472	7.33547	7.38152	8.20651	7.77502	8.03352	7.20286	7.33019	7.83146	8.33955	8.06811	8.27456	-0.168648	0.544362	0.322389	0.389029	0.071719	0.29723	-0.238356	0.013117	0.007501	0.107855	0.250705	0.718714	-0.131862	-0.005285	0.44994	0.133035	0.293088	0.241041	0.106494	-0.018402	0.442439	0.02518	0.042383	-0.477673
13340858	AT1G16520	8.6936	8.18981	8.69907	9.27266	8.70782	8.83182	8.29329	7.99499	8.49386	9.07591	8.75777	8.62466	8.66338	8.65507	9.00798	9.70111	9.05379	8.9586	8.75764	8.25802	9.13206	9.44517	8.75837	8.93787	-0.030225	0.465262	0.308913	0.428459	0.345973	0.126781	-0.400314	-0.194819	-0.205204	-0.196745	0.049945	-0.207161	0.094262	-0.397054	0.124077	-0.255943	-0.295429	-0.020736	0.494576	-0.202235	0.329281	-0.059198	-0.345374	0.186425
13340870	AT1G16540	7.54111	7.37126	7.2966	7.62643	7.36608	7.29399	7.72421	7.85307	7.38324	7.39921	7.77549	8.09045	7.85398	7.66582	7.65523	7.75694	7.49199	7.7876	8.3124	7.94655	7.95408	7.5855	7.45742	7.88454	0.31286	0.294562	0.358629	0.130509	0.125912	0.493614	0.183095	0.481814	0.086635	-0.22722	0.409413	0.79646	0.458424	0.280731	0.298848	-0.171434	-0.034576	0.096938	0.275329	-0.201083	0.212213	0.055786	-0.443989	-0.699522
13340894	AT1G16560	10.1578	10.2564	10.1964	10.305	10.1693	10.1193	10.2394	10.1822	10.3394	10.337	10.2924	10.4752	10.2995	10.4017	10.4826	10.6076	10.3359	10.448	10.4497	10.4612	10.5272	10.6223	10.5503	10.6494	0.14166	0.14532	0.28627	0.30258	0.16661	0.32871	0.08165	-0.07416	0.14307	0.03193	0.12307	0.35592	0.15029	0.05954	0.04452	0.01467	0.21439	0.20137	0.06864	0.1337	-0.09855	-0.01726	0.09132	-0.15455
13340904	AT1G16590	8.50033	8.16823	8.21491	8.53412	8.30635	8.32891	8.3119	8.48087	8.71563	8.41777	8.39127	8.46874	8.66028	8.6026	8.66103	8.58511	8.48225	8.29348	8.47372	8.47956	8.70192	8.23095	8.41208	8.44937	0.159944	0.434363	0.446122	0.050991	0.175898	-0.035427	-0.188433	0.312636	0.500715	-0.116349	0.084921	0.139837	-0.186556	-0.123039	0.040892	-0.354163	-0.070165	0.155896	0.001877	-0.435675	-0.459823	-0.237814	-0.155086	0.016059
13340912	AT1G16640	7.0929	5.05301	5.4188	6.76886	6.31478	5.43471	6.50464	5.30835	5.80821	6.971	5.15444	4.53061	6.88581	5.51443	5.71807	7.2102	6.64642	6.3339	6.95618	5.48035	6.18823	7.35475	6.15198	6.04646	-0.207094	0.461426	0.299272	0.441341	0.331646	0.899196	-0.588256	0.255346	0.389409	0.202144	-1.16033	-0.904097	0.070378	-0.03408	0.470163	0.144547	-0.494444	-0.287445	0.658634	-0.289426	0.080754	-0.057597	0.665891	0.616652
13340917	AT1G16650	7.84525	7.35449	7.21055	7.2176	7.04336	6.98585	7.83159	7.95158	7.33091	7.30466	6.94403	6.90365	7.96924	7.36183	7.25085	7.01555	6.96402	7.0428	7.74687	7.66969	7.5356	7.36947	6.85971	6.85186	0.123984	0.00734	0.040301	-0.202047	-0.079341	0.056945	-0.013665	0.597089	0.120361	0.087065	-0.099337	-0.082203	-0.222365	0.307854	0.284749	0.353922	-0.104315	-0.190933	-0.2087	-0.289235	0.164388	0.266857	-0.004978	-0.10873
13340931	AT1G16670	8.61561	8.12423	8.25177	8.109	8.46757	8.32899	8.82123	8.39848	8.62587	8.52842	9.02485	9.20218	9.32488	9.10993	9.29425	9.14889	9.33144	9.21737	9.47486	9.3624	9.27866	9.47823	9.61696	9.44225	0.709266	0.985693	1.04248	1.03989	0.863871	0.888377	0.205616	0.274248	0.374101	0.419421	0.557285	0.873192	0.149978	0.252472	-0.015589	0.329342	0.285519	0.224889	-0.055638	-0.021776	-0.38969	-0.090079	-0.271766	-0.648303
13340941	AT1G16680	9.98285	9.90218	10.0846	10.0161	10.0282	9.8316	9.97046	9.95875	9.89905	10.086	9.81452	9.65589	9.88119	9.95471	10.0738	10.0434	10.1621	9.83971	9.70105	9.96554	9.95161	9.89036	9.67725	9.76511	-0.101656	0.05252	-0.01076	0.02729	0.13384	0.008103	-0.012389	0.056563	-0.185504	0.06983	-0.213701	-0.175709	-0.180145	0.010833	-0.122183	-0.153058	-0.484811	-0.074598	-0.167756	-0.04573	0.063321	-0.222888	-0.27111	0.101111
13340952	AT1G16690	7.0242	6.93502	7.11491	7.24744	7.11302	7.14718	7.07943	7.06537	7.1113	7.09936	6.68682	7.04742	7.2646	7.01662	7.36837	7.50924	7.15931	7.06282	7.17474	7.11302	7.28815	7.31345	7.29038	7.15486	0.240401	0.081597	0.253456	0.261801	0.046292	-0.084366	0.055227	0.130345	-0.003618	-0.148085	-0.426195	-0.09976	-0.089861	0.096397	-0.080221	-0.195794	0.131077	0.092044	-0.145088	-0.033948	-0.076603	-0.047709	0.557272	0.191804
13340966	AT1G16700	9.44441	9.1651	9.09932	9.28393	9.50728	9.82587	9.40876	9.3093	9.28926	9.28059	9.60915	9.7205	9.09992	9.11979	9.06618	9.3128	9.51497	9.76131	9.3826	9.38169	9.25792	9.38053	9.52397	9.7744	-0.344491	-0.045311	-0.033144	0.028867	0.007692	-0.064563	-0.035651	0.144193	0.18994	-0.003345	0.101872	-0.105369	0.282677	0.261897	0.191743	0.067736	0.009	0.01309	0.318328	0.117704	0.001803	0.071081	-0.092872	0.118459
13340976	AT1G16705	6.16312	6.31654	6.63527	6.73401	6.03267	6.68613	6.28733	6.36829	6.21709	5.85648	6.70397	6.10337	6.12871	6.41436	6.09785	5.9103	6.15399	6.55438	6.11065	5.96529	6.2528	6.05638	6.22356	6.31758	-0.034405	0.097812	-0.537417	-0.823709	0.121325	-0.13175	0.124211	0.051742	-0.418178	-0.877531	0.671302	-0.58276	-0.01806	-0.449069	0.154946	0.146078	0.069569	-0.2368	-0.142271	-0.500811	0.573124	1.02361	-0.601733	0.34596
13340983	AT1G16710	8.38155	8.52105	8.21855	8.45276	8.37926	8.45731	8.39084	8.45995	8.26507	8.32945	8.39978	8.3368	8.53472	8.52346	8.52368	8.46905	8.51827	8.37004	8.57828	8.48592	8.50427	8.405	8.49798	8.53683	0.153164	0.002411	0.305132	0.016291	0.139012	-0.087266	0.00929	-0.061098	0.046519	-0.12331	0.020525	-0.120516	0.043565	-0.037542	-0.019409	-0.064044	-0.020287	0.166784	0.034275	0.023556	-0.065928	0.059266	-0.040812	0.2873
13341008	AT1G16720	10.8565	11.0472	10.9131	11.039	11.2888	11.2078	10.9371	10.9768	10.7657	11.0377	11.1418	10.8712	10.9391	10.9461	10.7966	11.0258	11.3427	11.2233	10.8872	10.8617	10.7007	11.0602	11.1304	11.0406	0.08265	-0.10111	-0.1165	-0.01322	0.05385	0.0155	0.08064	-0.07034	-0.14744	-0.00132	-0.14696	-0.33663	-0.05193	-0.08436	-0.09596	0.03442	-0.21223	-0.1827	-0.13257	-0.01402	0.05148	0.03574	-0.06527	0.15393
13341023	AT1G16740	7.63614	7.31152	7.62601	7.22072	7.85233	7.72364	7.56832	7.61375	7.52177	7.51493	7.47912	7.67491	7.62017	7.37078	7.52603	7.285	7.5778	7.67009	7.46785	7.57415	7.6586	7.26563	7.48562	7.59043	-0.015974	0.059256	-0.099977	0.064288	-0.274539	-0.053558	-0.067825	0.302227	-0.104239	0.294212	-0.373209	-0.048733	-0.152324	0.203372	0.132564	-0.019376	-0.092178	-0.079654	-0.084499	-0.098855	0.236803	-0.313588	0.281031	-0.030921
13341028	AT1G16760	4.82709	5.59869	5.00035	5.39659	4.39276	5.4372	5.06114	5.05971	5.20817	5.07698	5.041	5.22161	5.0149	5.01162	5.17155	5.0396	5.18149	5.22418	5.06584	4.84599	4.84107	5.11728	5.09641	4.96724	0.187812	-0.587066	0.171202	-0.356992	0.788738	-0.213012	0.234051	-0.538979	0.207816	-0.319616	0.648247	-0.215585	0.050939	-0.16563	-0.33048	0.077678	-0.085083	-0.256946	-0.183112	0.373349	-0.538296	0.397294	-0.73333	-0.041361
13341038	AT1G16770	4.47483	5.69792	5.9057	5.14863	5.61202	6.24778	4.82935	6.09499	5.24096	5.44179	5.46943	5.45536	5.73453	5.48437	5.41601	5.36886	5.44546	5.65002	5.41571	4.77567	4.73753	5.42352	5.35987	5.31844	1.2597	-0.213556	-0.489691	0.220231	-0.166562	-0.597754	0.354523	0.397073	-0.664748	0.293159	-0.142586	-0.792412	-0.318821	-0.708696	-0.678481	0.054664	-0.085588	-0.331582	-0.673344	-1.10577	-0.013733	-0.238495	0.056998	0.46083
13341046	AT1G16790	6.16304	5.98109	5.99478	6.28791	6.06975	6.21144	5.90052	6.18537	5.95917	6.03821	5.91293	5.37955	5.42366	5.84124	5.34832	5.67784	5.53689	5.64442	5.31856	5.81702	5.45711	5.47364	5.52777	5.5449	-0.739377	-0.139846	-0.646452	-0.610071	-0.532857	-0.567019	-0.26252	0.204288	-0.035608	-0.249701	-0.156814	-0.83189	-0.105101	-0.024224	0.108786	-0.204201	-0.009117	-0.099524	0.157419	-0.228512	0.144394	0.0455	0.147697	0.732366
13341050	AT1G16810	10.1742	10.1557	10.1406	10.0251	10.1584	9.93398	10.1469	10.0282	10.0376	10.1175	10.0215	9.99208	10.1967	10.2219	10.2289	10.1978	10.3152	10.2169	10.3245	10.4337	10.0841	10.2632	10.2158	10.2484	0.02246	0.06622	0.08831	0.17272	0.15673	0.282958	-0.02735	-0.12754	-0.10306	0.09245	-0.1369	0.0581	0.12783	0.21181	-0.14489	0.06546	-0.09938	0.03148	0.15518	0.33935	-0.04183	-0.02699	0.03752	-0.02662
13341055	AT1G16825	7.37565	7.14782	7.42995	7.73333	7.34154	7.36222	7.38806	7.55857	7.46786	7.58374	7.46335	7.40205	7.35743	7.52844	7.35962	7.76014	7.48384	7.34658	7.35683	7.42995	7.65124	7.64142	7.39726	7.25708	-0.018221	0.380623	-0.070326	0.026808	0.142293	-0.015642	0.01241	0.41075	0.03792	-0.149591	0.121803	0.039823	-0.000595	-0.098498	0.291623	-0.118716	-0.086576	-0.089507	-0.013005	-0.509248	0.253703	0.030875	-0.208379	-0.12933
13341061	AT1G16830	6.25882	6.21097	6.21395	5.84892	5.80473	5.52031	5.95378	6.80636	6.01726	5.69324	5.78171	5.62208	5.96986	5.98449	6.19632	5.60584	5.67379	6.35848	6.23449	6.00928	6.39555	5.76894	6.59141	6.01335	-0.28896	-0.226485	-0.01763	-0.243086	-0.130936	0.838174	-0.305047	0.595392	-0.196687	-0.15568	-0.023019	0.101769	0.264627	0.024799	0.199234	0.163106	0.917621	-0.34514	0.569674	-0.570593	0.395921	0.318786	0.94064	-0.446909
13341063	AT1G16860	8.5456	8.8428	8.6674	8.8577	8.4885	8.47059	8.44667	8.61294	8.4188	8.62102	8.35003	8.45803	8.58	8.8915	8.8302	8.67705	8.6955	8.64543	8.47988	8.62102	8.60598	8.60735	8.38761	8.49536	0.034395	0.048701	0.162796	-0.180653	0.206999	0.174844	-0.098934	-0.229861	-0.248598	-0.236679	-0.138471	-0.012557	-0.10012	-0.270477	-0.224218	-0.069704	-0.307892	-0.150072	-0.001186	-0.040616	0.02438	0.166975	-0.169421	-0.137515
13341073	AT1G16880	11.3013	11.4187	11.7406	11.7269	11.634	11.5977	11.2976	11.3522	11.7808	11.8082	11.5424	11.4542	11.4476	11.553	11.7958	11.8089	11.7725	11.6653	11.3862	11.5012	11.6075	11.8002	11.6085	11.536	0.14628	0.13429	0.05523	0.08193	0.13848	0.06754	-0.00371	-0.06652	0.04027	0.08125	-0.09157	-0.1435	-0.06139	-0.05185	-0.18831	-0.00863	-0.16396	-0.12926	-0.05768	0.01467	-0.22858	-0.08988	-0.07239	0.01424
13341089	AT1G16910	4.02497	3.16024	3.13644	3.04892	3.16124	3.08336	3.16615	2.80127	3.06383	2.90849	3.17738	2.98892	3.79491	3.66459	3.65249	3.21806	3.43998	2.97432	3.95446	3.27628	3.38417	3.11156	3.31533	2.93829	-0.230058	0.504355	0.516042	0.16914	0.27874	-0.109039	-0.858817	-0.358965	-0.072614	-0.140427	0.016138	-0.094435	0.159554	-0.38831	-0.26832	-0.106505	-0.124655	-0.036029	1.01837	-0.029345	-0.195706	0.033922	-0.140793	0.058406
13341093	AT1G16930	6.85084	6.89949	6.75912	7.11751	7.30832	6.82358	6.83842	7.0329	7.01958	7.35337	7.2561	6.72132	6.6972	7.13167	7.09108	7.15673	7.49548	6.9024	6.8852	7.15214	7.06205	7.28162	7.10697	6.31077	-0.153638	0.232179	0.331968	0.039218	0.187157	0.078821	-0.012422	0.133415	0.260469	0.235859	-0.052218	-0.102261	0.187992	0.020472	-0.029034	0.124886	-0.388511	-0.591634	0.200414	-0.112943	-0.289503	-0.110973	-0.336293	-0.489373
13341097	AT1G16940	2.97413	3.70623	4.12669	3.11998	3.22811	3.9835	3.00207	3.87273	2.88653	3.62029	3.42896	4.08181	3.21433	3.08354	3.372	2.83678	3.69257	3.21027	3.2232	2.99824	2.7935	3.17983	3.00857	3.05227	0.240199	-0.62269	-0.754695	-0.2832	0.464467	-0.773237	0.027943	0.166495	-1.24016	0.500308	0.200857	0.098306	0.008872	-0.085298	-0.578498	0.343043	-0.684001	-0.157999	-0.019071	-0.251793	0.661667	-0.157265	-0.884858	-0.256305
13341101	AT1G16950	2.69888	2.52175	2.98081	2.87511	2.72334	2.67183	2.94335	2.71445	2.88152	2.78203	2.90871	2.95433	3.04203	3.33436	2.7006	2.91147	2.85146	2.54448	2.53126	2.7529	2.99235	2.77731	2.71322	2.81909	0.343146	0.812609	-0.280213	0.036362	0.12812	-0.127345	0.244462	0.192702	-0.099287	-0.093075	0.185379	0.2825	-0.510765	-0.581455	0.291749	-0.134161	-0.138238	0.274603	-0.755227	-0.774157	0.391036	-0.041086	-0.323617	-0.007897
13341105	AT1G16960	9.41342	9.32266	9.16094	8.86893	9.29279	9.57599	9.03081	9.12285	9.03858	9.24509	9.35369	9.59946	8.52267	8.71493	8.90571	8.86535	9.09029	8.78629	8.38282	8.89043	8.52047	8.77915	9.01059	8.45377	-0.890747	-0.607727	-0.25523	-0.003581	-0.202494	-0.789707	-0.382609	-0.199801	-0.122362	0.376157	0.060901	0.02347	-0.139845	0.175497	-0.38524	-0.086203	-0.0797	-0.332517	0.242764	0.375298	-0.262878	-0.46236	-0.140601	-0.355987
13341112	AT1G16980	3.07773	3.48263	3.52587	2.92269	2.82065	3.07603	3.20577	3.10902	2.90937	3.17651	3.0443	3.30534	3.15635	2.97146	2.91652	3.35915	3.59352	3.17924	3.41388	3.25216	3.66534	3.43895	3.00183	3.04274	0.078619	-0.511174	-0.609356	0.436467	0.772871	0.103208	0.128038	-0.373616	-0.616505	0.25382	0.223647	0.229317	0.257525	0.2807	0.74882	0.079797	-0.591697	-0.136496	0.129487	0.654316	1.36532	-0.174023	-0.815344	-0.365813
13341128	AT1G17000	3.35748	2.37056	2.5086	2.88313	2.27647	2.7545	2.44406	2.55944	2.33228	2.67464	2.53526	2.06666	2.44864	2.72173	2.39891	3.05222	2.5086	2.38844	2.86223	2.5086	2.84566	2.55632	2.38571	2.33647	-0.908843	0.351172	-0.109686	0.169088	0.232127	-0.36606	-0.913427	0.188885	-0.176316	-0.208496	0.258788	-0.687836	0.413588	-0.21313	0.446743	-0.495905	-0.122894	-0.051973	1.32702	-0.402015	0.623059	-0.287409	-0.381682	0.635863
13341144	AT1G17010	2.76468	2.44578	2.50788	2.51189	2.83144	2.73979	2.95163	2.83101	2.55297	2.83101	3.22177	2.70234	3.14183	2.88392	3.0728	2.74736	2.74736	2.99363	3.22753	2.88394	2.71056	3.08044	3.19777	2.95163	0.377147	0.438142	0.564918	0.235471	-0.084078	0.253835	0.186947	0.385228	0.045084	0.319116	0.390335	-0.037455	0.085698	2.1e-05	-0.362236	0.333084	0.450408	-0.041998	-0.101249	-0.385207	-0.40732	0.013968	0.060073	-0.004543
13341151	AT1G17020	5.66334	5.96008	5.86979	5.55364	6.70061	6.85638	5.83137	5.7775	6.59582	5.70791	7.06836	8.29525	4.96621	5.54381	5.76339	5.02731	4.99299	5.29624	5.08641	5.82006	5.16148	5.03608	5.42416	5.98256	-0.697129	-0.416269	-0.106396	-0.526334	-1.70761	-1.56014	0.168025	-0.18258	0.726032	0.154268	0.367754	1.43887	0.120195	0.276247	-0.601909	0.008768	0.43117	0.686317	-0.04783	0.458827	-1.32794	-0.1455	0.063416	-0.752553
13341158	AT1G17030	3.82726	3.64555	3.65357	3.93598	3.66421	3.84187	3.68021	3.48873	3.04055	3.57296	4.06224	3.01597	4.11001	3.7819	3.47925	3.56477	3.89298	3.86112	3.70793	3.85268	4.09455	3.50153	3.58923	3.78884	0.282756	0.136348	-0.174324	-0.371207	0.228778	0.01925	-0.147045	-0.156818	-0.613023	-0.363016	0.398039	-0.8259	-0.402079	0.070778	0.615305	-0.063237	-0.303752	-0.072277	-0.255034	0.227596	1.22833	0.299779	-0.701791	0.753623
13341165	AT1G17040	7.16327	6.93858	7.2802	7.16767	7.21345	7.06787	7.1843	7.15181	7.44809	7.052	7.33847	7.0152	6.93693	7.0702	7.3576	7.2529	7.46626	7.40047	7.36733	7.23059	7.27395	7.35587	7.24983	7.14972	-0.226337	0.131622	0.077396	0.085232	0.252813	0.332602	0.02103	0.213231	0.167886	-0.115671	0.12503	-0.052666	0.430397	0.160387	-0.08365	0.102969	-0.216427	-0.250756	0.409367	-0.052844	-0.251536	0.21864	-0.341457	-0.19809
13341178	AT1G17050	9.35576	9.22737	9.45147	9.76291	10.6815	10.7785	9.6504	9.08206	9.29071	9.79829	10.5509	10.5899	9.61226	9.21213	9.331	9.86734	10.6906	10.7524	9.64637	9.09221	9.1002	9.63569	10.4171	10.7741	0.2565	-0.015237	-0.120469	0.104428	0.00903	-0.02615	0.294639	-0.145313	-0.160759	0.035381	-0.13065	-0.18868	0.034116	-0.119916	-0.230801	-0.231651	-0.27345	0.02176	-0.260523	0.025397	-0.070042	-0.267032	-0.1428	0.21044
13341187	AT1G17070	6.21419	6.61183	6.27679	6.34969	6.1463	6.02852	6.32221	6.47178	6.14053	6.20297	6.25497	5.95555	6.83299	6.53873	6.65271	6.28296	6.28935	6.63768	6.97132	6.79804	6.54601	6.08425	6.46299	6.57138	0.6188	-0.073098	0.375923	-0.066728	0.143057	0.609161	0.108016	-0.140047	-0.136256	-0.146717	0.108674	-0.072966	0.138331	0.259307	-0.106699	-0.198707	0.173635	-0.066301	0.030315	0.399354	0.029557	-0.05199	0.064961	0.006665
13341191	AT1G17100	7.74047	8.41448	9.4156	9.18693	8.89801	9.38358	7.95771	8.25084	9.24039	9.01962	8.81645	9.17665	8.08582	8.49289	9.20779	9.22024	8.96996	9.30813	8.14936	8.51287	9.28625	9.38821	8.97844	9.41973	0.345344	0.078416	-0.207806	0.033308	0.071947	-0.075452	0.217238	-0.163632	-0.175207	-0.167318	-0.081558	-0.206926	0.063546	0.019981	0.078461	0.167964	0.008477	0.111603	-0.153692	0.183613	0.253668	0.335282	0.090035	0.318529
13341196	AT1G17120	6.46245	6.41551	6.60424	6.86562	6.39656	6.09659	6.43778	6.13129	6.33845	6.97626	6.40994	6.08304	5.79577	5.81185	5.73137	5.82292	5.68115	5.55779	6.15784	5.67328	5.78758	6.18026	5.52666	5.42355	-0.666685	-0.603665	-0.872863	-1.04271	-0.71541	-0.538801	-0.024671	-0.284223	-0.265782	0.110642	0.013387	-0.013555	0.362077	-0.138572	0.056211	0.35734	-0.154483	-0.134243	0.386748	0.145651	0.321993	0.246698	-0.16787	-0.120688
13341199	AT1G17130	9.8801	9.82425	9.84466	9.89169	9.9007	9.92343	9.91532	9.7566	9.87182	9.86531	9.85882	10.0561	9.50484	9.50147	9.5198	9.61135	9.46911	9.53249	9.4779	9.48092	9.65776	9.40055	9.58149	9.51025	-0.375261	-0.322778	-0.324862	-0.280337	-0.431586	-0.390934	0.035217	-0.067646	0.02716	-0.026378	-0.041879	0.132674	-0.02694	-0.020556	0.137961	-0.2108	0.11238	-0.022238	-0.062157	0.04709	0.110801	-0.184422	0.154259	-0.154912
13341210	AT1G17150	3.23028	3.19071	3.37889	3.44078	3.08198	3.2185	3.35155	3.38331	3.26912	3.34793	3.3367	3.18328	3.76736	3.25536	3.60736	3.54079	3.4058	3.35449	3.37178	3.40505	3.93076	3.22722	3.57048	3.4141	0.53708	0.064648	0.228472	0.100008	0.323814	0.135993	0.121273	0.192605	-0.109777	-0.092851	0.254716	-0.03522	-0.395577	0.149691	0.323397	-0.313568	0.164682	0.059609	-0.51685	-0.042914	0.433174	-0.220717	-0.090034	0.094829
13341215	AT1G17160	8.4845	8.43219	8.65789	9.18784	8.49859	8.0395	8.6365	8.66695	8.53883	9.18971	8.18652	8.32388	7.55846	7.58961	7.8365	8.47394	7.60666	7.37989	7.41706	7.61261	7.63037	8.29948	7.28195	7.14508	-0.926045	-0.842579	-0.821383	-0.713896	-0.891929	-0.659615	0.152	0.234769	-0.119058	0.001874	-0.312072	0.284376	-0.141395	0.023008	-0.206136	-0.174459	-0.32471	-0.234807	-0.293395	-0.211761	-0.087078	-0.176333	-0.012638	-0.519183
13341223	AT1G17170	4.97131	3.84007	3.60897	5.4471	4.55334	6.03222	4.6573	4.5819	3.87194	6.23149	5.60334	6.6132	3.56097	3.21571	3.2196	4.34958	2.94053	4.19327	4.07156	3.50047	2.65512	6.48818	3.46708	5.95885	-1.41034	-0.624366	-0.389372	-1.09752	-1.61281	-1.83895	-0.314019	0.741831	0.262967	0.784385	1.05	0.580985	0.51059	0.284762	-0.564483	2.13859	0.526548	1.76558	0.824609	-0.457069	-0.82745	1.35421	-0.523456	1.1846
13341228	AT1G17180	2.73448	2.62127	2.50762	3.01775	2.44553	2.52325	2.61935	2.4842	2.33635	2.81913	2.99487	2.98059	3.02124	3.23478	2.56091	3.31871	2.4813	2.36115	3.05281	2.80231	2.77805	3.0852	2.77239	3.17919	0.286763	0.61351	0.053291	0.30096	0.035766	-0.162098	-0.11513	-0.137076	-0.171266	-0.198624	0.549333	0.457335	0.031573	-0.43247	0.217137	-0.233514	0.291089	0.818034	0.146703	-0.295394	0.388403	-0.03489	-0.258244	0.360699
13341233	AT1G17190	5.85012	5.24039	6.05297	6.35169	5.97977	7.02075	5.18331	4.98337	5.65626	5.88154	6.42443	6.34957	5.35692	5.5185	5.11089	5.50809	6.61415	6.84453	5.40794	5.06325	5.57688	5.76196	5.78204	6.44448	-0.493206	0.27811	-0.942072	-0.843601	0.634384	-0.176215	-0.666811	-0.257023	-0.396703	-0.470145	0.444662	-0.671184	0.05102	-0.455253	0.465988	0.253871	-0.832114	-0.400056	0.717831	-0.19823	0.862691	0.724016	-1.27678	0.271128
13341238	AT1G17200	9.89966	9.7497	9.82498	10.0953	9.82861	9.67631	9.61755	9.5546	9.49188	9.80078	9.59921	9.07002	9.71734	9.50104	9.58273	9.7408	9.80439	9.5396	9.62126	9.60234	9.68592	9.83057	9.69526	9.38627	-0.182322	-0.248658	-0.242251	-0.35445	-0.024223	-0.136708	-0.282108	-0.195098	-0.333097	-0.294469	-0.229402	-0.606289	-0.096072	0.101295	0.103196	0.089774	-0.109128	-0.153333	0.186036	0.296393	0.436293	0.384243	0.120274	0.452956
13341245	AT1G17220	10.4085	10.4443	10.7111	10.7526	10.8911	10.7607	10.3253	10.3709	10.6728	10.8153	10.712	10.5783	10.4905	10.5081	10.5959	10.7922	10.7079	10.8341	10.3047	10.3152	10.4523	10.8003	10.7185	10.6903	0.08196	0.06385	-0.11517	0.0396	-0.18327	0.07334	-0.08321	-0.07333	-0.03827	0.06266	-0.17914	-0.18248	-0.18581	-0.19289	-0.1436	0.00808	0.01058	-0.14378	-0.1026	-0.11956	-0.10533	-0.05458	0.18972	0.0387
13341260	AT1G17230	9.01356	8.44572	8.26403	8.05503	8.20076	7.90281	8.8167	8.60096	8.23089	8.07001	8.12282	8.1092	8.78482	8.11588	8.06804	7.675	7.99468	7.76832	8.63209	8.12357	8.32746	7.74528	7.89241	7.94898	-0.228738	-0.329839	-0.19599	-0.380032	-0.206078	-0.134487	-0.19686	0.155237	-0.033145	0.014972	-0.077938	0.206389	-0.152736	0.007684	0.259422	0.070282	-0.102271	0.180653	0.044124	-0.147553	0.292567	0.05531	-0.024333	-0.025736
13341265	AT1G17235	4.4075	4.20754	3.78777	4.22704	4.43713	4.00034	4.22677	4.20697	4.11151	4.21605	3.84362	4.03916	5.16843	4.31489	4.24646	3.95803	4.09333	4.14789	4.40778	4.55743	4.32992	3.96252	3.9543	4.24773	0.760923	0.107352	0.458691	-0.269015	-0.343802	0.147557	-0.18074	-0.000562	0.323738	-0.01099	-0.59351	0.038829	-0.760649	0.242541	0.083457	0.004496	-0.139029	0.099842	-0.579909	0.243103	-0.240281	0.015486	0.454481	0.061013
13341267	AT1G17250	6.51531	6.86475	6.37452	6.62568	6.09986	6.50329	6.21131	6.63685	6.4006	6.24282	6.46523	5.93962	5.76131	4.86147	5.40475	5.13802	5.55093	5.10928	5.80352	5.28395	5.18526	5.56088	4.94297	5.41121	-0.754001	-2.00328	-0.969773	-1.48766	-0.548924	-1.39401	-0.304002	-0.227895	0.026075	-0.38286	0.365372	-0.563673	0.042214	0.422489	-0.21949	0.422852	-0.607958	0.301929	0.346216	0.650384	-0.245565	0.805712	-0.97333	0.865602
13341273	AT1G17260	5.10087	5.63161	5.65102	5.37391	5.51847	5.58879	5.33828	5.20333	5.0993	5.07095	5.36115	5.82858	4.84948	4.99612	4.97886	4.82618	5.03537	4.97305	4.79431	4.74373	5.00001	4.39879	4.93798	4.83203	-0.251389	-0.635488	-0.672167	-0.547727	-0.483102	-0.615738	0.237406	-0.428282	-0.551723	-0.302955	-0.157328	0.239798	-0.05517	-0.252387	0.021151	-0.427393	-0.097396	-0.141015	-0.292576	0.175895	0.572874	-0.124438	0.059932	-0.380813
13341293	AT1G17285	2.30225	2.69324	2.40966	2.48042	2.30993	2.91671	2.70452	2.96273	2.58336	2.47131	2.64406	2.57302	2.93479	2.58516	2.76809	3.16523	3.0755	2.57494	2.55276	2.43967	3.12506	2.726	2.76476	2.75683	0.632539	-0.108077	0.358427	0.684804	0.765573	-0.341772	0.402273	0.269489	0.173692	-0.009118	0.334132	-0.343689	-0.382027	-0.145492	0.356967	-0.439225	-0.310746	0.18189	-0.7843	-0.414981	0.183275	-0.430107	-0.644878	0.525579
13341298	AT1G17290	10.0995	9.91718	9.70032	9.29396	9.47613	9.62605	10.1859	10.1279	9.8485	9.55323	9.81549	10.2108	10.0796	9.85683	9.60246	9.21152	9.50771	9.91698	10.2926	10.1019	9.78306	9.41562	9.66217	10.0674	-0.01986	-0.06035	-0.097863	-0.08244	0.03158	0.290926	0.08642	0.210757	0.148181	0.259266	0.339354	0.584776	0.213	0.245097	0.1806	0.204098	0.154462	0.15044	0.12658	0.03434	0.032419	-0.055168	-0.184892	-0.434336
13341313	AT1G17300	4.10479	4.73725	4.37664	4.31187	4.44352	5.07941	4.37426	4.73375	4.16995	4.48935	4.52122	4.32871	4.13857	3.66649	3.56638	3.80473	3.69341	3.62982	3.84731	4.02731	3.80426	3.37119	3.50572	3.80109	0.033775	-1.07076	-0.81026	-0.50714	-0.75011	-1.44959	0.269465	-0.003498	-0.206694	0.177477	0.077704	-0.750698	-0.291256	0.360818	0.237878	-0.43354	-0.187681	0.171268	-0.560721	0.364316	0.444572	-0.611017	-0.265385	0.921966
13341317	AT1G17330	8.56815	7.84265	7.76152	8.12028	7.92885	7.95844	8.58075	7.9032	7.95704	8.16839	8.02228	8.3098	7.80973	7.02189	7.11719	7.53251	7.41981	7.26136	7.54311	6.78044	7.06589	7.81662	7.34602	7.22018	-0.758419	-0.820763	-0.644325	-0.587775	-0.509037	-0.697082	0.012594	0.060552	0.195525	0.048105	0.093423	0.351356	-0.26662	-0.241448	-0.051305	0.284118	-0.073793	-0.041175	-0.279214	-0.302	-0.24683	0.236013	-0.167216	-0.392531
13341326	AT1G17340	8.98053	9.00528	8.9157	9.01063	9.215	9.03174	9.18904	8.96477	8.78006	9.15045	9.41968	9.64195	9.49938	9.29318	9.11989	9.37315	9.30184	9.32629	9.46105	9.21894	9.27936	9.48018	9.35034	9.48842	0.518855	0.287902	0.204189	0.362526	0.086836	0.294546	0.208507	-0.040506	-0.135644	0.139827	0.204671	0.610213	-0.03833	-0.074236	0.159469	0.107026	0.0485	0.162134	-0.246837	-0.03373	0.295113	-0.032801	-0.156171	-0.448079
13341345	AT1G17345	3.36859	2.65526	3.14266	2.63417	2.35428	2.55188	2.70827	2.70119	2.76986	2.63291	2.49084	2.45388	2.69264	2.67855	2.32184	2.69642	2.55537	2.39317	2.75154	2.36535	2.61829	2.57633	2.46454	2.34053	-0.675945	0.02329	-0.820823	0.062252	0.201082	-0.158705	-0.66032	0.045929	-0.372806	-0.001255	0.136553	-0.098	0.058899	-0.313206	0.296455	-0.120085	-0.090829	-0.052647	0.719219	-0.359135	0.669261	-0.11883	-0.227382	0.045353
13341349	AT1G17350	9.92041	9.60394	9.42669	9.57561	9.47613	9.51259	9.90544	9.60552	9.47038	9.32587	9.53481	9.11985	8.49656	8.73734	9.22946	9.13437	8.96779	8.85071	8.89017	8.75963	9.21435	9.10916	9.11529	8.60577	-1.42385	-0.866605	-0.19723	-0.441241	-0.508343	-0.661877	-0.01497	0.001579	0.043692	-0.249739	0.058676	-0.392738	0.393615	0.022296	-0.015108	-0.025207	0.147505	-0.244946	0.408585	0.020717	-0.0588	0.224532	0.088829	0.147792
13341359	AT1G17360	10.3344	10.3797	10.7411	11.0071	11.23	11.2526	10.3108	10.0901	10.7639	11.0839	11.1575	11.1649	10.5335	10.5493	10.7449	10.9385	11.0928	11.1536	10.5845	10.3908	10.5478	10.8162	11.1486	11.1265	0.19915	0.16966	0.0038	-0.06864	-0.13725	-0.09906	-0.02363	-0.28959	0.02278	0.07676	-0.07255	-0.08776	0.05096	-0.15851	-0.19709	-0.12225	0.05583	-0.02709	0.07459	0.13108	-0.21987	-0.19901	0.12838	0.06067
13341372	AT1G17420	7.74695	7.57355	8.04392	8.04674	8.25442	8.57729	8.01153	7.96083	8.21745	8.73668	9.09796	9.54938	8.23921	7.92596	8.32141	8.39556	8.72442	9.01883	8.37464	8.10823	8.59915	8.83102	8.92562	9.40204	0.492256	0.352408	0.277494	0.34882	0.470001	0.441533	0.264577	0.387274	0.173533	0.689936	0.843541	0.972087	0.135431	0.18227	0.27774	0.435458	0.2012	0.383209	-0.129146	-0.205004	0.104207	-0.254478	-0.642341	-0.588878
13341382	AT1G17430	8.67367	8.09981	7.30043	8.13586	8.26859	8.17831	8.78553	8.03935	8.20103	8.44412	8.76231	8.72891	8.99325	8.35494	8.79581	8.86457	8.98233	8.79183	8.66193	8.75771	8.63423	9.09242	9.32829	8.81797	0.31958	0.255132	1.49537	0.728711	0.713739	0.613516	0.111861	-0.060466	0.900603	0.308262	0.493722	0.550599	-0.33132	0.402768	-0.161578	0.22785	0.345964	0.026144	-0.443181	0.463234	-1.06218	-0.080412	-0.147758	-0.524455
13341389	AT1G17455	6.25363	6.58939	6.26526	5.92761	5.18686	5.14375	6.16312	6.15666	6.41828	6.15051	5.29087	5.35579	6.3995	6.9753	7.01539	6.6476	5.28173	5.92448	6.86001	7.10631	6.85276	7.04578	5.86298	5.76062	0.145875	0.385905	0.75013	0.719993	0.094877	0.780731	-0.090508	-0.432729	0.153022	0.222902	0.104009	0.212043	0.460509	0.13101	-0.162635	0.398177	0.581246	-0.163866	0.551017	0.563739	-0.315657	0.175275	0.477237	-0.375909
13341394	AT1G17460	6.23841	7.38496	7.6184	5.37005	5.21405	5.9012	6.21823	7.6214	7.49316	5.45671	5.99964	6.00191	6.3873	7.49417	7.51748	6.38591	6.70039	6.74145	6.35388	7.45339	7.69856	5.89349	6.97321	6.90896	0.148887	0.109216	-0.100921	1.01586	1.48634	0.840258	-0.020179	0.236444	-0.125235	0.086653	0.785591	0.100713	-0.033422	-0.040783	0.181078	-0.492421	0.272815	0.167504	-0.013243	-0.277227	0.306313	-0.579074	-0.512776	0.066791
13341406	AT1G17470	9.32477	9.46953	9.70287	9.53012	9.1932	9.02084	9.35494	9.40412	9.5772	9.4381	9.36411	9.21592	9.19943	9.73417	9.64591	9.57746	9.19788	9.34864	9.35161	9.48016	9.61537	9.51688	9.23472	9.3279	-0.125337	0.264647	-0.056958	0.047338	0.004684	0.327804	0.030173	-0.065402	-0.125661	-0.092024	0.170915	0.195085	0.152176	-0.254007	-0.030542	-0.06058	0.036836	-0.020738	0.122003	-0.188605	0.095119	0.031444	-0.134079	-0.215823
13341419	AT1G17490	9.04644	8.99318	9.34312	8.7585	9.00678	8.96785	8.96265	8.98365	9.70241	9.12027	9.04491	9.38747	9.83915	9.81171	10.1936	9.5233	9.4693	9.52361	9.91049	10.2489	10.079	9.73524	9.93904	9.7861	0.792705	0.818524	0.850486	0.764807	0.462514	0.555759	-0.083792	-0.009534	0.359284	0.361777	0.038133	0.419617	0.071346	0.437233	-0.11466	0.211935	0.469746	0.262485	0.155138	0.446767	-0.473944	-0.149842	0.431613	-0.157132
13341424	AT1G17500	9.48409	9.19076	9.12027	9.26021	8.94473	9.09638	9.25348	9.31995	9.40346	9.43185	9.28632	9.71822	9.97959	9.56254	9.811	9.49256	9.35593	9.40415	10.081	9.84698	9.68029	9.94054	9.61851	9.5656	0.495502	0.371772	0.690732	0.23235	0.411207	0.30777	-0.230603	0.129184	0.28319	0.171643	0.341592	0.621847	0.101432	0.284441	-0.130711	0.447976	0.262577	0.161453	0.332035	0.155257	-0.413901	0.276333	-0.079015	-0.460394
13341436	AT1G17530	8.55185	8.59666	8.46407	8.54624	8.40594	8.31667	8.34709	8.68392	8.57566	8.82466	8.38537	8.51164	8.45739	8.52515	8.61871	8.70666	8.4321	8.51659	8.58424	8.74471	8.72247	8.71101	8.52724	8.56865	-0.094457	-0.07151	0.154635	0.160416	0.02616	0.199925	-0.204757	0.08726	0.11159	0.278413	-0.020566	0.194972	0.126846	0.219562	0.103765	0.004353	0.095146	0.052055	0.331603	0.132302	-0.007825	-0.27406	0.115712	-0.142917
13341440	AT1G17545	5.9357	5.90691	6.27723	5.84088	5.60747	6.26915	6.4803	6.17354	5.19534	5.47506	5.28133	6.35861	5.1292	5.92682	5.71208	5.92948	5.41041	5.44338	5.74769	5.3432	4.40597	4.89598	6.55411	5.4021	-0.806502	0.019911	-0.565156	0.088606	-0.197057	-0.825772	0.544599	0.266622	-1.0819	-0.365814	-0.326135	0.089457	0.618494	-0.583627	-1.30611	-1.03351	1.1437	-0.041273	0.073895	-0.850249	-0.224209	-0.667693	1.46984	-0.13073
13341443	AT1G17550	9.18769	9.53114	9.50868	9.64493	9.73132	10.2159	9.16316	9.38132	9.50792	9.63414	9.96793	10.359	9.23826	9.45145	9.62653	9.68849	10.0201	10.0953	9.35649	9.54048	9.61827	9.91665	10.0114	10.3671	0.050564	-0.079695	0.117845	0.043562	0.288819	-0.12067	-0.024533	-0.14982	-0.000764	-0.010788	0.236606	0.14312	0.11823	0.089032	-0.008256	0.228164	-0.00876	0.27188	0.142763	0.238852	-0.007492	0.238952	-0.245366	0.12876
13341450	AT1G17580	9.26658	9.23646	9.19066	9.2671	9.23652	9.12479	9.23035	9.20719	9.1255	9.35168	9.14754	8.99785	9.38077	9.2584	9.34794	9.29038	9.35685	9.23646	9.25587	9.26785	9.02534	9.36865	9.19675	9.0443	0.11418	0.021944	0.157283	0.023282	0.120332	0.11167	-0.036238	-0.029264	-0.065156	0.084579	-0.088972	-0.126938	-0.124898	0.009448	-0.322598	0.07827	-0.1601	-0.192158	-0.08866	0.038712	-0.257442	-0.006309	-0.071128	-0.06522
13341481	AT1G17610	7.45317	6.4313	7.24306	7.0283	6.64189	6.58146	7.17029	6.73746	7.24931	7.28791	7.43027	7.69701	7.75223	7.55286	7.94201	8.11744	7.70334	7.70736	7.937	7.97271	8.12157	8.21822	8.22126	8.28281	0.299057	1.12156	0.69895	1.08915	1.06146	1.1259	-0.282879	0.306161	0.006248	0.259613	0.788382	1.11555	0.184767	0.419847	0.17956	0.100779	0.517917	0.575449	0.467646	0.113686	0.173312	-0.158834	-0.270465	-0.540101
[truncated: 27,572 more rows]
[truncated: 26 more columns]

## Sheet: Defense_related
Supplemental Table 1: Gene expression in Col-0 and C24 after Pst infection: Plants were either sprayed with Pst (Pst infection) or MgCl2 solution (mock treatment) and samples taken after 2h, 4h, 8h, 16, 24h, and 48h. Gene expression was assessed using the Affymetrix Gene Arabidopsis 1.0 ST microarray publicly available at NCBI, GEO accession GSE90852. Columns A and B contain probe names and gene …
[truncated: 2,040 more rows]
[truncated: 26 more columns]

[truncated: 1 more sheets: JA_related]
