# Supplementary material for: Transcriptomic and Metabolomic Analysis of a Pseudomonas-Resistant versus a Susceptible Arabidopsis Accession
Source: Int J Mol Sci. 2022 Oct 11;23(20):12087. doi: 10.3390/ijms232012087 (PMC9603445; doi:10.3390/ijms232012087)
Supplement: Supplementary file 1 [file ijms-23-12087-s001.zip › Supplemental Table S2.xlsx]

## Sheet: Sheet 1
Supplemental Table 2: Primary metabolite profiles in Col-0 and C24 after Pst infection: Plants were either sprayed with Pst (Pst infection) or MgCl2 solution (mock treatment) and samples taken after 2h, 4h, 8h, 16, 24h, and 48h. Primary metabolite profiles were measured using GC-MS and analyzed using TargetSearch 1.28.1. Metabolites were annotated using the Golm Metabolome Database (GMD). Columns…
		Averages						Standard error						Averages						Standard error						Averages						Standard error						Averages						Standard error
Metabolite	Analyte (GMD)	Col-0 mock 2h	Col-0 mock 4h	Col-0 mock 8h	Col-0 mock 16h	Col-0 mock 24h	Col-0 mock 48h	Col-0 mock 2h	Col-0 mock 4h	Col-0 mock 8h	Col-0 mock 16h	Col-0 mock 24h	Col-0 mock 48h	Col-0 Pst 2h	Col-0 Pst 4h	Col-0 Pst 8h	Col-0 Pst 16h	Col-0 Pst 24h	Col-0 Pst 48h	Col-0 Pst 2h	Col-0 Pst 4h	Col-0 Pst 8h	Col-0 Pst 16h	Col-0 Pst 24h	Col-0 Pst 48h	C24 mock 2h	C24 mock 4h	C24 mock 8h	C24 mock 16h	C24 mock 24h	C24 mock 48h	C24 mock 2h	C24 mock 4h	C24 mock 8h	C24 mock 16h	C24 mock 24h	C24 mock 48h	C24 Pst 2h	C24 Pst 4h	C24 Pst 8h	C24 Pst 16h	C24 Pst 24h	C24 Pst 48h	C24 Pst 2h	C24 Pst 4h	C24 Pst 8h	C24 Pst 16h	C24 Pst 24h	C24 Pst 48h
1,6-Anhydro-beta-D-glucose	1,6-Anhydro-beta-D-glucose (3TMS)	4.57424	4.52955	4.58387	4.51413	4.45428	4.50637	0.080348	0.0453868	0.0487429	0.0385204	0.0431661	0.0689773	4.62709	4.57323	4.54598	4.52244	4.58596	4.60146	0.0560266	0.0275189	0.0984111	0.0336321	0.0663153	0.0517228	4.89206	4.88295	4.74575	4.85462	4.86046	4.86532	0.0748775	0.0562655	0.0353164	0.0428655	0.0280393	0.045809	4.98531	4.97188	4.85503	4.90255	4.92004	4.94158	0.0481204	0.0551188	0.0497117	0.0311044	0.0462265	0.091496
2-amino-butanoic acid	Butanoic acid, 2-amino- (2TMS)	3.20006	3.25212	3.50389	3.28822	3.19674	3.21494	0.0297425	0.0524206	0.0156528	0.0188041	0.0320744	0.0491566	3.24548	3.39486	3.51602	3.3307	3.23426	3.314	0.0581252	0.0339605	0.0246076	0.0391288	0.028505	0.0528004	3.34165	3.38206	3.41519	3.48452	3.36837	3.32426	0.0292818	0.0226842	0.0306663	0.0293814	0.032405	0.03309	3.37458	3.47537	3.58719	3.51371	3.38283	3.41925	0.0303733	0.0285452	0.0372316	0.0363726	0.0356401	0.0616461
2-Oxoglutaric acid	2-Oxoglutaric acid	3.41995	3.43746	3.30067	2.88855	3.29001	3.37073	0.0543678	0.0652727	0.0399835	0.0898055	0.0672412	0.0786437	3.49251	3.37826	3.41082	3.01969	3.54948	3.38744	0.0365164	0.0668021	0.0987032	0.10011	0.0647286	0.0779101	3.71434	3.63885	3.4049	3.16868	3.63375	3.68032	0.0751048	0.0589654	0.0783335	0.118983	0.0591086	0.0832504	3.54629	3.45804	3.44103	3.01108	3.71289	3.72596	0.034042	0.0721309	0.0617451	0.0902424	0.0311586	0.0538343
3,6-anhydro-Galactose	Galactose, 3,6-anhydro- (1MEOX) (3TMS)	2.55069	2.6468	2.48873	2.34183	2.48231	2.55863	0.123024	0.0920674	0.0792121	0.0492208	0.0600192	0.0948572	2.63834	2.74713	2.50552	2.51495	2.44981	2.6872	0.113417	0.0936115	0.121789	0.0840562	0.15946	0.10816	2.85108	2.68659	2.5264	2.67782	2.61007	2.7844	0.045972	0.101515	0.123561	0.154549	0.104726	0.0745352	2.84394	2.70372	2.56435	2.5047	2.73859	2.86936	0.0907945	0.0811606	0.131963	0.0801666	0.0960139	0.119886
4-Aminobutyric acid	4-Aminobutyric acid (3TMS)	4.26651	4.31121	4.33183	4.19407	4.22827	4.24652	0.0696449	0.13535	0.0925188	0.0516373	0.045859	0.0227286	4.30386	4.3709	4.37721	4.27236	4.26759	4.17432	0.0526729	0.0245991	0.0339745	0.0431247	0.0365762	0.0516806	4.34443	4.39555	4.12141	4.40103	4.37175	4.26206	0.0199158	0.0502651	0.0591179	0.0798259	0.0706319	0.0526376	4.29933	4.34089	4.24886	4.34653	4.29187	4.28538	0.0550272	0.0609259	0.105196	0.059816	0.0474507	0.0665689
4-hydroxy-benzoic acid	4-hydroxy-benzoic acid (2TMS)	3.57105	3.51848	3.5371	3.54611	3.52791	3.51068	0.0517547	0.0629543	0.0561373	0.0574433	0.0556104	0.0554989	3.5627	3.54695	3.49379	3.54357	3.56535	3.53934	0.0670136	0.0429175	0.0761758	0.0469823	0.0442686	0.056622	3.5691	3.51653	3.45948	3.60405	3.55684	3.56021	0.0871722	0.0468814	0.0503567	0.0529317	0.0554854	0.0406511	3.54764	3.49786	3.48775	3.52825	3.54821	3.57349	0.0628034	0.042225	0.0602423	0.0481272	0.0540937	0.0319575
Adenine	Adenine (2TMS)	3.28332	3.31961	3.29829	3.11686	3.12726	3.19984	0.0489971	0.0653788	0.0638774	0.0532858	0.041153	0.0522896	3.30035	3.29694	3.25138	3.14638	3.31377	3.28521	0.0476189	0.0265836	0.0648918	0.0332223	0.0633344	0.0549296	3.41469	3.4672	3.24122	3.30423	3.37066	3.40544	0.0475273	0.0169986	0.0574821	0.0545157	0.0307137	0.0183064	3.4284	3.39067	3.40201	3.27369	3.38875	3.43625	0.042448	0.0326286	0.0708883	0.0386475	0.0246372	0.0797091
Alanine	Alanine (2TMS)	5.54831	5.50373	5.48977	5.34898	5.50247	5.65933	0.0250928	0.0631976	0.0299264	0.0693996	0.0446844	0.0207181	5.51757	5.53814	5.54959	5.51246	5.59893	5.69664	0.0506109	0.0169515	0.0358315	0.0308143	0.0426767	0.0341643	5.6849	5.67549	5.48083	5.72394	5.7155	5.76516	0.0226521	0.012859	0.0291653	0.0246862	0.0222723	0.0206801	5.70126	5.68377	5.61997	5.74092	5.77796	5.86509	0.015484	0.0165542	0.0313712	0.018095	0.0207304	0.0446983
alpha,alpha'-D-Trehalose,	Trehalose, alpha,alpha'-, D- (8TMS)	3.6643	3.51874	3.49325	3.39517	3.42046	3.50888	0.0382	0.0496422	0.020504	0.0930699	0.0409187	0.0534185	3.583	3.51588	3.48273	3.3849	3.64987	3.67577	0.0415946	0.0370559	0.0671957	0.0182267	0.161352	0.0556283	3.63686	3.65484	3.37349	3.48336	3.46002	3.45776	0.0226032	0.0373298	0.053019	0.0519956	0.0325641	0.0347482	3.55263	3.58273	3.46238	3.43405	3.48347	3.60856	0.0354744	0.0344692	0.0513135	0.038936	0.0213389	0.107385
Altrose	Altrose (1MEOX) (5TMS) MP	5.23899	5.14904	5.08668	5.01178	5.59165	5.715	0.0990383	0.0702545	0.0919685	0.0432108	0.0642565	0.0211034	5.15988	5.01993	5.08646	5.00622	5.6835	5.71917	0.12241	0.0457627	0.15602	0.0590737	0.0450799	0.00947133	5.49576	5.47341	5.11463	5.61974	5.7426	5.7265	0.0513842	0.070429	0.0595866	0.0384295	0.00489229	0.0105714	5.37782	5.38768	5.33383	5.48601	5.74239	5.73605	0.0723651	0.0657964	0.101736	0.0580469	0.00568692	0.00664068
Arabinose	Arabinose (1MEOX) (4TMS) MP	4.21055	4.2919	4.3921	4.20678	4.31713	4.28584	0.0677063	0.0569374	0.0615667	0.06108	0.03657	0.0727815	4.32654	4.3975	4.38633	4.26052	4.41141	4.20746	0.0551692	0.0372833	0.113968	0.0709703	0.0541857	0.0743527	4.32124	4.30947	4.16028	4.31433	4.33348	4.28516	0.0470015	0.0682815	0.0821599	0.0776655	0.0426667	0.0616468	4.33172	4.27701	4.16242	4.27533	4.30231	4.29095	0.0463215	0.0720875	0.0764329	0.0535776	0.0384559	0.0518587
Arabitol	Arabitol (5TMS)	2.65414	2.59558	2.71347	2.57064	2.55722	2.68604	0.0485047	0.0289582	0.028681	0.057934	0.036256	0.0342179	2.70053	2.69923	2.71961	2.60519	2.72263	2.69162	0.0308705	0.0175181	0.069578	0.0258028	0.0326751	0.0392507	2.69183	2.65272	2.59375	2.66924	2.64203	2.62958	0.0300458	0.0350247	0.0445288	0.0234532	0.0310758	0.0378437	2.69102	2.65828	2.61115	2.69268	2.63052	2.68911	0.0398772	0.037799	0.075629	0.0256884	0.0387888	0.0512949
Ascorbic acid	Ascorbic acid (4TMS)	3.27462	3.02255	3.30621	3.06762	3.07813	3.23191	0.0484781	0.0943661	0.0528541	0.079225	0.0575913	0.0544822	3.29489	3.25221	3.2675	3.15267	3.19815	3.25925	0.0758463	0.109277	0.0228054	0.056075	0.068002	0.0553878	3.40204	3.35256	2.95266	3.26583	3.29886	3.10021	0.053162	0.0310621	0.0887884	0.046478	0.039983	0.0311372	3.34235	3.33915	3.35183	3.31986	3.33545	3.43532	0.0777233	0.0551763	0.0630125	0.0968679	0.0748467	0.12596
Asparagine	Asparagine (3TMS)	4.00469	4.06778	4.21494	3.9109	4.07366	4.05768	0.11769	0.147761	0.113418	0.10172	0.0844641	0.0918655	4.10883	4.13664	4.09737	4.15871	4.12877	4.15455	0.12834	0.118675	0.171156	0.142444	0.141837	0.118317	4.25367	4.18023	4.10151	4.29631	4.33161	4.37756	0.0702197	0.154951	0.138373	0.194543	0.116816	0.0604595	4.17266	4.16737	4.1158	4.23203	4.26623	4.27567	0.0824548	0.100611	0.134235	0.130144	0.0924152	0.113556
Aspartic acid	Aspartic acid (3TMS)	4.90948	4.88155	4.93086	5.29796	4.75007	4.89411	0.042495	0.0755858	0.0472115	0.0508727	0.0278715	0.0421684	4.91076	4.79088	4.87766	5.33689	4.88559	4.93636	0.0422787	0.0190334	0.0585464	0.0534953	0.0339726	0.0396729	5.05627	5.01666	4.8975	5.51279	4.96906	5.09506	0.0308655	0.044603	0.0433487	0.0481502	0.0485507	0.0384834	5.00125	4.95869	4.95688	5.48964	5.01025	5.0142	0.0494954	0.0277427	0.0466596	0.0396608	0.0511578	0.0394959
Benzoic acid	Benzoic acid (2TMS)	3.9092	3.86994	3.96307	3.88978	3.93228	4.03389	0.0474832	0.0360267	0.0698384	0.0902761	0.0202934	0.0290889	3.89499	3.98506	3.9573	3.88691	3.97843	3.98196	0.0345717	0.0461853	0.0286367	0.0301967	0.0219871	0.0340427	3.87438	3.86699	3.9389	3.95219	3.96075	4.01652	0.051915	0.0282417	0.0356171	0.0269126	0.0283167	0.0292011	3.86055	4.08362	3.85174	3.91659	3.87782	3.93953	0.0432234	0.0454192	0.0770539	0.0428082	0.0625379	0.0160282
beta-alanine	beta-alanine (3TMS)	3.65484	3.77868	3.73094	3.48766	3.49039	3.50194	0.0564271	0.0690626	0.0694021	0.0297546	0.0216106	0.0292301	3.68852	3.92669	3.70667	3.61085	3.54329	3.69669	0.0261919	0.0367382	0.0410149	0.0556995	0.0488934	0.048986	3.47031	3.59511	3.43757	3.60262	3.36526	3.2571	0.024443	0.0386993	0.0476081	0.0671881	0.0617447	0.0366715	3.50084	3.66037	3.53669	3.6693	3.35141	3.63425	0.0455364	0.0437494	0.0463166	0.0506999	0.046359	0.082463
Citramalic acid	Citramalic acid (3TMS)	2.91785	2.86129	2.84973	2.78669	2.78039	2.85721	0.0554774	0.0316521	0.0454018	0.0644954	0.0629471	0.0648196	2.86611	2.88233	2.96799	2.69792	2.88828	2.88976	0.0526595	0.0713174	0.0424363	0.0854825	0.0388202	0.0390291	3.00292	2.93288	2.87482	2.8682	2.84973	2.86426	0.0538162	0.0418236	0.0529659	0.0863803	0.0667257	0.0471432	2.82818	2.90473	2.8728	2.80889	2.80239	3.01019	0.0425083	0.0723129	0.0564234	0.0560579	0.0545831	0.0359462
Citric acid	Citric acid (4TMS)	5.17559	5.12463	5.11785	5.11281	5.12934	5.17727	0.0599945	0.0812502	0.10607	0.0732672	0.0661609	0.084891	5.15053	4.91121	5.20028	5.1254	5.28391	5.17932	0.0892548	0.124144	0.123332	0.118988	0.0883971	0.0847182	5.30788	5.1641	5.09398	5.49354	5.45224	5.23306	0.0979626	0.0924874	0.0903567	0.0836706	0.0935177	0.0808775	5.09059	5.15414	5.20628	5.4073	5.30305	5.37132	0.107599	0.0570546	0.0751484	0.0845085	0.0720807	0.0763795
Citrulline or Arginine	Citrulline or Arginine	3.69552	3.68677	3.83019	3.44548	3.66298	3.80941	0.0743255	0.0540224	0.0951404	0.0399542	0.0772611	0.0811157	3.77419	3.8305	3.73031	3.64076	3.79722	3.81957	0.0484626	0.0608821	0.0797916	0.0732842	0.0816868	0.0698762	4.06085	4.04655	3.79121	3.94055	4.10616	4.09745	0.104771	0.0626369	0.0794639	0.0905113	0.0589893	0.0657121	4.18397	4.03991	4.09664	3.99766	4.15648	4.06318	0.0901244	0.0535697	0.0990134	0.100817	0.102307	0.110844
Cysteine	Cysteine (3TMS)	3.31036	3.48615	3.596	3.37546	3.42184	3.50861	0.104533	0.133668	0.0897739	0.0926987	0.0706287	0.0530015	3.46782	3.51775	3.60233	3.5311	3.57638	3.49558	0.130443	0.0875742	0.121025	0.114841	0.121674	0.108113	3.56874	3.58388	3.4763	3.67635	3.71294	3.72666	0.0634673	0.127963	0.0825572	0.160451	0.107638	0.0692141	3.56469	3.47097	3.454	3.65655	3.60598	3.68635	0.0732479	0.0883546	0.132304	0.114058	0.0829461	0.0919896
Dehydroascorbic acid dimer	Dehydroascorbic acid dimer (2MEOX) MP	5.2254	5.06533	5.28459	5.06655	5.0446	5.1339	0.0941927	0.0958496	0.0916332	0.0676988	0.0666469	0.0454236	5.29761	5.1921	5.18586	5.13658	5.22376	5.13949	0.0854785	0.0370919	0.0875563	0.0792146	0.107715	0.0763247	5.28641	5.33189	5.0802	5.20671	5.35155	5.1436	0.0762897	0.0794337	0.0545819	0.0394627	0.0686568	0.071928	5.31443	5.34904	5.31157	5.33373	5.36689	5.38589	0.0618603	0.0703587	0.0760492	0.0637818	0.0662384	0.0799245
Docosanoic acid	Docosanoic acid (1TMS)	3.36494	3.28893	3.35256	3.38675	3.28131	3.26909	0.124273	0.115602	0.103671	0.105355	0.0897003	0.108778	3.3408	3.18542	3.27258	3.31396	3.32631	3.37205	0.103138	0.0761063	0.126124	0.0907953	0.102505	0.129455	3.35518	3.40725	3.17154	3.43044	3.32818	3.38852	0.129668	0.113628	0.0717326	0.0928187	0.0679352	0.108298	3.32629	3.37104	3.34196	3.30757	3.37601	3.38495	0.0868474	0.094262	0.118537	0.101913	0.0833079	0.114577
Erythritol	Erythritol (4TMS)	3.29218	3.26667	3.3339	3.24373	3.24696	3.35294	0.0612397	0.0427651	0.0340238	0.0594784	0.0361136	0.0263974	3.34761	3.36986	3.42167	3.2923	3.33541	3.33612	0.0251036	0.0234984	0.020262	0.0379961	0.0506767	0.0379828	3.50486	3.42806	3.3708	3.44095	3.43465	3.42906	0.0221725	0.0430794	0.0437392	0.0215794	0.0288225	0.0367603	3.46528	3.45404	3.39583	3.46987	3.44403	3.49527	0.0255396	0.0384776	0.0520754	0.0210734	0.03759	0.0579593
Fructose	Fructose (1MEOX) (5TMS) MP	4.5612	4.51646	4.38812	4.37343	5.33668	5.55768	0.044687	0.0509887	0.0624548	0.0611329	0.0856686	0.113115	4.55512	4.48224	4.42462	4.4339	5.48706	5.38801	0.083638	0.0264487	0.112727	0.0449489	0.0935865	0.089922	4.91946	4.85965	4.5366	4.94253	5.64504	5.54468	0.080311	0.0930731	0.0458231	0.0609378	0.0223849	0.0669214	4.89423	4.83305	4.62632	4.80979	5.57635	5.64859	0.0522586	0.0607438	0.0954005	0.0573646	0.0499089	0.0474767
Fucose	Fucose (1MEOX) (4TMS) MP	4.13828	4.07555	4.0829	3.95472	4.03088	4.18374	0.0505334	0.0451409	0.057829	0.0774902	0.0339463	0.0653312	4.13613	4.19135	4.1002	4.03501	4.17494	4.17418	0.037193	0.0354651	0.0925252	0.0547402	0.0528169	0.0624707	4.15315	4.06005	3.87784	4.03959	4.06922	4.13121	0.027258	0.0696576	0.0784946	0.0657434	0.0587446	0.0484337	4.11114	4.05139	3.89311	4.00894	4.08627	4.20342	0.0412824	0.0526323	0.0887037	0.0531832	0.0666888	0.0557887
Fumaric acid	Fumaric acid (2TMS)	5.54563	5.53432	5.5104	5.4355	5.46235	5.57642	0.0293166	0.0282609	0.0372146	0.0751892	0.0569164	0.00549739	5.49893	5.50598	5.57511	5.34518	5.56298	5.57441	0.044994	0.0509383	0.0031959	0.105015	0.0113649	0.00898138	5.06234	5.1145	5.09715	4.93182	4.89145	5.15594	0.0855036	0.0431175	0.0659521	0.11022	0.0764084	0.0423118	4.91467	5.08643	5.01819	4.77269	4.84707	5.32446	0.0624148	0.0716541	0.0776106	0.078765	0.0518536	0.0572522
Galactinol	Galactinol (9TMS)	4.50301	4.16731	4.09024	3.65817	3.88371	4.42961	0.0752226	0.0818157	0.0510527	0.196913	0.083765	0.1087	4.46516	4.20406	4.04315	3.76752	4.41282	4.71552	0.0930725	0.0833773	0.0751535	0.0450626	0.113823	0.0636236	3.8205	3.57428	3.29331	3.18813	3.40726	4.01366	0.141707	0.10548	0.0997562	0.0800094	0.0643199	0.0403071	3.57426	3.69815	3.28756	3.13708	3.73589	4.07215	0.0851264	0.0827947	0.138125	0.0953817	0.0554684	0.0838432
Gluconic acid	Gluconic acid (6TMS)	3.50321	3.43998	3.52128	3.33971	3.39643	3.56649	0.0509761	0.0295401	0.0287479	0.0412014	0.0356689	0.0516616	3.48062	3.45806	3.50518	3.43897	3.53137	3.59932	0.0509441	0.0295149	0.0446058	0.035865	0.0560292	0.0388477	3.62517	3.59926	3.41052	3.55658	3.61489	3.61523	0.0537161	0.0451922	0.0511935	0.0286123	0.0349053	0.0370034	3.57209	3.58159	3.60765	3.55944	3.62187	3.70498	0.0370125	0.0243063	0.0554889	0.0348396	0.041206	0.072827
Glucose	Glucose (1MEOX) (5TMS) BP	4.45616	4.36232	4.33007	4.22755	4.75274	5.3171	0.0725978	0.0699592	0.0758211	0.0333192	0.0756605	0.140267	4.40599	4.30415	4.28831	4.22045	4.96702	5.05839	0.12351	0.0274998	0.109213	0.0241965	0.103657	0.0777331	4.69103	4.65377	4.29117	4.74717	5.2101	5.25913	0.0712909	0.0900118	0.0420243	0.0348297	0.0735448	0.114059	4.54667	4.54976	4.49157	4.60776	5.12709	5.3262	0.0519704	0.053206	0.106425	0.0531191	0.047005	0.0695672
Glucose-6-phosphate	Glucose-6-phosphate (1MEOX) (6TMS) MP	2.43464	2.34191	2.45329	2.3683	2.35675	2.51888	0.0767587	0.101809	0.0633926	0.0474696	0.0753343	0.141337	2.30537	2.35514	2.38541	2.3201	2.41067	2.44537	0.101803	0.0887872	0.141841	0.0988841	0.107079	0.125136	2.73133	2.60767	2.35029	2.7077	2.58166	2.67997	0.077948	0.0892681	0.109482	0.173578	0.0978872	0.0975948	2.6555	2.50067	2.42464	2.49987	2.54642	2.60644	0.0765088	0.0940914	0.113391	0.0968171	0.090263	0.123926
Glutamine	Glutamine (3TMS)	4.92943	4.8984	4.95096	4.63025	4.74455	4.97834	0.0837	0.114868	0.0528715	0.0482366	0.0918089	0.0699298	4.94969	4.9386	4.86598	4.80291	4.94736	5.07559	0.091175	0.0786764	0.105066	0.0507872	0.127564	0.0533021	5.12916	5.08926	4.83913	5.03724	5.09119	5.13898	0.0932074	0.10099	0.0926865	0.161545	0.0779577	0.0695448	5.13546	5.04683	5.00983	4.86029	5.15711	5.37018	0.074093	0.0483279	0.0781067	0.069164	0.0312032	0.109378
Glutamine	Glutamine [-H2O] (3TMS) MP	4.26905	4.30877	4.4502	4.29627	4.23491	4.44563	0.0867843	0.0783367	0.0994743	0.0449047	0.0633721	0.0836547	4.36065	4.35454	4.34586	4.29762	4.39462	4.53826	0.0789118	0.0298086	0.109493	0.0616013	0.0330865	0.117587	4.43967	4.43033	4.24883	4.47685	4.52241	4.5951	0.147693	0.0782556	0.0656957	0.0502035	0.0559043	0.0958143	4.51587	4.40417	4.47287	4.33831	4.54169	4.65886	0.0846445	0.0541953	0.0768708	0.0472407	0.0732252	0.0972828
Glutaric acid	Glutaric acid (2TMS)	2.83898	2.78085	2.64344	2.66282	2.73676	2.92547	0.0812797	0.0806047	0.0454943	0.0415838	0.0453394	0.0952806	2.76517	2.79397	2.92433	2.65104	2.84642	2.95902	0.0973483	0.0456267	0.0660609	0.0532965	0.0998965	0.0626067	2.91444	2.68091	2.65088	2.76156	2.67832	2.75521	0.0659903	0.0835393	0.0484265	0.0956887	0.0894265	0.0528483	2.76294	2.73799	2.66267	2.72139	2.75191	2.74046	0.0451734	0.087328	0.0763888	0.0367738	0.0611987	0.0663828
Glyceric acid	Glyceric acid (3TMS)	4.10637	4.10761	4.07711	3.71582	4.15939	4.40627	0.0276349	0.0455025	0.0634877	0.0801053	0.0254346	0.0693583	4.19617	4.15551	4.22065	3.75728	4.40282	4.32171	0.0357412	0.0213744	0.0557121	0.0400634	0.0576613	0.0194019	4.24504	4.13832	4.11444	3.9403	4.36471	4.49348	0.044459	0.0168028	0.031717	0.0620588	0.0150216	0.0675311	4.28799	4.15066	4.18427	3.94795	4.41517	4.42343	0.0180569	0.0271228	0.0708064	0.0354806	0.0518623	0.0344188
Glycerol	Glycerol (3TMS)	4.75782	4.72826	4.6901	4.68523	4.60856	4.631	0.0238301	0.0262539	0.0230114	0.0135501	0.0291667	0.016197	4.75139	4.77369	4.66522	4.68889	4.71956	4.72997	0.0339895	0.0205585	0.060207	0.035912	0.0633419	0.0197481	4.75577	4.73061	4.70435	4.67682	4.62238	4.71043	0.0387365	0.014598	0.0139065	0.0353526	0.0247742	0.0239304	4.78417	4.77503	4.6941	4.74636	4.72224	4.81871	0.0241206	0.0108008	0.032495	0.0415811	0.0535993	0.037632
Glycerol-3-phosphate	Glycerol-3-phosphate (4TMS)	3.08091	3.05792	3.13168	2.90611	2.89642	2.98107	0.0627317	0.0470578	0.0325865	0.0578529	0.038308	0.0467117	3.11517	3.08013	3.15516	2.97801	3.06247	3.15305	0.0493928	0.033487	0.0588769	0.036911	0.070797	0.0566998	3.14681	3.08318	3.04936	3.15676	3.02354	3.05776	0.0647727	0.0766422	0.0631444	0.120652	0.050072	0.0454876	3.08756	3.09513	3.16113	3.09842	3.08189	3.1729	0.0436897	0.0264222	0.077603	0.0530649	0.0519529	0.0704265
Glycine	Glycine (2TMS)	2.62219	2.61645	2.65802	2.68438	2.61131	2.64471	0.0172204	0.0272642	0.0254559	0.0126285	0.0462575	0.033507	2.64545	2.64433	2.65403	2.62479	2.65315	2.64645	0.0296799	0.0232057	0.0246912	0.0396005	0.0278741	0.0218047	2.67516	2.67325	2.63671	2.69247	2.66239	2.64575	0.027834	0.0199984	0.0284945	0.0200016	0.0177087	0.0205907	2.70083	2.68676	2.6858	2.63894	2.69509	2.69994	0.0170252	0.0178683	0.0223333	0.030197	0.0318463	0.033533
Glycine	Glycine (3TMS)	4.28692	4.53363	4.68502	4.04721	4.3808	4.55115	0.0235267	0.0569122	0.0452266	0.0252404	0.0378106	0.0456175	4.57123	4.69762	4.71762	4.08484	4.61592	4.55027	0.0515811	0.0737994	0.05849	0.0366748	0.0927825	0.0726959	4.57494	4.59791	4.44641	4.26896	4.64118	4.7892	0.0792628	0.0650887	0.0387394	0.0340066	0.0203561	0.0754565	4.83597	4.64045	4.63856	4.18104	4.67085	4.97094	0.0479357	0.0383687	0.0603833	0.0279124	0.0349137	0.0770114
Guanidine	Guanidine (3TMS)	3.19777	3.12142	3.22578	3.24146	3.29411	3.19635	0.126211	0.0215037	0.0459846	0.0756871	0.0682683	0.0570307	3.39572	3.29778	3.22324	3.27266	3.17741	3.45412	0.14364	0.119471	0.0412808	0.0943154	0.0338208	0.0424929	3.3708	3.08902	2.90621	2.97585	2.8251	2.81246	0.0672858	0.0438832	0.0614504	0.0407668	0.0566754	0.0558914	3.04855	3.05485	3.02162	3.03184	3.02541	3.23439	0.0476239	0.0449501	0.076449	0.0607462	0.0833776	0.0622403
Hexacosanoic acid	Hexacosanoic acid (1TMS)	3.45662	3.33603	3.38694	3.42642	3.3344	3.3193	0.126426	0.117628	0.0963656	0.108622	0.0928123	0.103796	3.39222	3.29375	3.28799	3.34162	3.39013	3.40873	0.116079	0.109613	0.1292	0.093879	0.0951872	0.11462	3.40283	3.46319	3.19171	3.48748	3.34817	3.41742	0.142917	0.113706	0.0571931	0.0787092	0.0668156	0.103603	3.35015	3.34351	3.38299	3.3357	3.4026	3.41932	0.106367	0.108796	0.109448	0.0967449	0.0869775	0.113045
Histidine	Histidine (3TMS)	2.58087	2.54017	2.58332	2.32791	2.43851	2.45732	0.129961	0.115733	0.117237	0.0926248	0.121588	0.164139	2.68048	2.59923	2.55887	2.52507	2.48559	2.4512	0.0846164	0.13707	0.156868	0.0987519	0.168921	0.160232	2.81025	2.8402	2.58646	2.72041	2.71845	2.67018	0.0915494	0.0901591	0.128649	0.211121	0.120016	0.110321	2.76401	2.73172	2.57238	2.66237	2.70207	2.76245	0.0950719	0.103076	0.137541	0.102416	0.107833	0.155621
Homoserine	Homoserine (3TMS)	2.43457	2.46409	2.28898	2.23933	2.52188	2.87906	0.0825468	0.0810207	0.0684393	0.103588	0.0807681	0.0628384	2.48685	2.50702	2.48287	2.33547	2.76285	2.83512	0.0431184	0.032193	0.0551356	0.0311902	0.109414	0.0751077	2.86271	2.46891	2.26583	2.51788	2.59284	2.90858	0.0255771	0.0674788	0.0810786	0.077365	0.0343955	0.0794333	2.72378	2.43486	2.39577	2.44721	2.70688	2.93034	0.0610343	0.0768935	0.052088	0.0444233	0.0523211	0.080337
Hydroxyproline	Hydroxyproline (3TMS)	3.33029	3.3192	3.37555	3.24722	3.23291	3.29994	0.0881032	0.0612579	0.0381783	0.0713223	0.0396319	0.025968	3.42371	3.42358	3.48326	3.29129	3.31954	3.27085	0.0759823	0.0282814	0.0282564	0.0463078	0.0726436	0.051271	3.44104	3.46453	3.31924	3.35956	3.3431	3.25547	0.0291381	0.0416084	0.0682395	0.032603	0.0459712	0.0333478	3.42786	3.44644	3.3574	3.36469	3.29395	3.23524	0.0477402	0.0610956	0.060033	0.0309095	0.0534804	0.0562165
Indole-3-acetonitrile	Indole-3-acetonitrile (1TMS)	3.52177	3.31003	3.42689	3.16798	3.23301	3.43309	0.0783907	0.0437574	0.0311177	0.0605764	0.0637973	0.061935	3.43606	3.32733	3.33145	3.41053	3.36699	3.70547	0.0782977	0.0475015	0.0657618	0.0787782	0.0801746	0.0525587	2.98817	3.02861	2.71161	3.04214	2.8858	2.82818	0.0542909	0.0353996	0.0853579	0.0934142	0.0230565	0.0355161	2.83994	2.79572	2.88596	2.8604	2.88526	3.15107	0.0738576	0.0457235	0.0684546	0.068455	0.0383548	0.114827
Isoleucine	Isoleucine (2TMS)	4.43625	4.65251	4.84035	4.53462	4.43367	4.25057	0.0250114	0.0503516	0.0200868	0.0353672	0.0927163	0.101447	4.57488	4.91106	4.83702	4.5332	4.40669	4.41253	0.0309323	0.0372989	0.0669183	0.0815236	0.0503748	0.0831624	4.4052	4.71704	4.67662	4.54252	4.4438	4.14009	0.0303691	0.0432729	0.0482748	0.110782	0.0836628	0.0684357	4.53633	4.86616	4.8103	4.62634	4.35483	4.44296	0.0361594	0.0563625	0.0867792	0.0542181	0.0497428	0.0925386
Isopropyl-beta-D-thiogalactoside	Isopropyl-beta-D-thiogalactoside (4TMS)	4.20674	4.26759	4.21175	4.11492	4.13828	4.196	0.0488689	0.0373118	0.047179	0.0439453	0.0220181	0.0643705	4.24175	4.26494	4.23088	4.27778	4.277	4.30502	0.0428126	0.0367433	0.0813241	0.0355513	0.0777095	0.0761695	4.35845	4.4209	4.29618	4.41922	4.2994	4.40442	0.0630768	0.0498037	0.0758014	0.0947525	0.0623502	0.0469528	4.35425	4.36582	4.32926	4.36909	4.37311	4.40999	0.0313545	0.0419005	0.0879668	0.0407311	0.0513238	0.0802998
Leucine	Leucine (2TMS)	4.49452	4.73914	4.92885	4.541	4.42308	4.26243	0.0282907	0.0518809	0.051633	0.0352206	0.0969309	0.0940862	4.60645	5.01255	4.8472	4.46788	4.34577	4.4197	0.0158552	0.0406328	0.0731224	0.0741745	0.0488848	0.0655367	4.49294	4.84015	4.72502	4.51967	4.43755	4.17869	0.0388893	0.0480041	0.0497543	0.0934801	0.0697239	0.0613124	4.61012	4.97231	4.85221	4.57952	4.33482	4.51977	0.0424353	0.0604502	0.0784093	0.0488582	0.0512485	0.0926659
Maleic acid	Maleic acid (2TMS)	6.04927	6.04921	6.03342	6.0421	6.0399	6.05018	0.00593196	0.00396667	0.00973941	0.00433025	0.00905097	0.00416409	6.0314	6.05674	6.05196	6.04583	6.05327	6.05152	0.015213	0.00203572	0.00169559	0.00139739	0.00316346	0.00464579	5.49385	NA	NA	4.96377	5.05082	NA	0.262724	NA	NA	0.0955728	0.0357647	NA	NA	5.04869	NA	4.92135	5.0839	NA	NA	0.0124453	NA	0.052567	0.024791	NA
Malic acid	Malic acid (3TMS)	5.09619	5.19496	5.25718	4.93485	4.94591	5.01658	0.0655407	0.0535617	0.076287	0.115983	0.0621974	0.0702421	5.12377	5.09489	5.29964	4.88155	5.08595	5.08606	0.082286	0.0888184	0.0618079	0.142327	0.0744674	0.0604342	5.03145	5.14786	5.1423	4.78605	4.97735	5.12396	0.0851736	0.0482949	0.0484878	0.10798	0.0826095	0.0411071	4.87615	5.08246	5.14036	4.57873	5.03797	5.31494	0.0778447	0.0537012	0.0626293	0.0978768	0.0528	0.0528254
Maltose	Maltose (1MEOX) (8TMS) BP	3.98598	3.86562	3.96281	3.82773	3.86152	3.96673	0.0397914	0.0459874	0.0533859	0.106712	0.0385542	0.0739675	3.95666	3.90542	3.98424	3.987	4.03568	4.10104	0.032786	0.0446885	0.0694346	0.0383956	0.0725953	0.0522315	4.07008	4.1073	3.86317	4.05172	4.03668	4.05636	0.0368013	0.0352141	0.0862384	0.0515867	0.0618293	0.0373002	4.02643	4.05231	3.98901	4.08074	4.10275	4.20376	0.0400703	0.0577367	0.074758	0.0489972	0.0663482	0.0726304
Mannose	Mannose (major)	3.57851	3.55341	3.51479	3.52046	3.48528	3.82437	0.0471669	0.0541792	0.0548004	0.0534303	0.0297072	0.0875779	3.5707	3.56411	3.51053	3.61707	3.675	3.79474	0.0468296	0.0201758	0.0855578	0.0344886	0.0796523	0.0717493	3.67127	3.66359	3.43851	3.7418	3.74505	3.92177	0.0388142	0.0769384	0.0587247	0.0893123	0.0520377	0.0600879	3.64117	3.6492	3.51658	3.71829	3.74306	4.0053	0.0352353	0.0461853	0.0816555	0.0475438	0.0475029	0.0580378
Methionine	Methionine (2TMS)	3.56273	3.52113	3.56793	3.35319	3.45979	3.83302	0.0619793	0.09131	0.0670934	0.0670857	0.0486869	0.0423291	3.5482	3.61084	3.54098	3.42962	3.54605	3.78014	0.04388	0.0293771	0.0441091	0.0534966	0.0786402	0.0458822	3.71093	3.65969	3.45164	3.62873	3.6077	3.81638	0.0357849	0.0490917	0.0424642	0.0869447	0.0623039	0.0480481	3.71975	3.57737	3.47901	3.55799	3.63494	3.84968	0.0396818	0.057572	0.0925884	0.0459456	0.0438516	0.0783274
myo-Inositol	myo-Inositol (6TMS)	5.15851	5.1236	5.09782	4.96198	4.88374	5.03956	0.0360618	0.0110325	0.0234463	0.0380572	0.0544787	0.0348511	5.17683	5.12729	5.13162	5.00253	5.09181	4.96112	0.0349512	0.0174634	0.0372417	0.0281149	0.0380882	0.0330866	5.06579	5.06348	4.91683	4.95955	4.94733	4.98148	0.0387585	0.0455195	0.0281369	0.0227147	0.021473	0.034101	5.03315	5.08294	4.9739	4.96974	4.95317	4.9496	0.0293098	0.0313577	0.0550704	0.0371371	0.0210608	0.0681277
Nicotinic acid	Nicotinic acid (1TMS)	3.40458	3.41782	3.51972	3.34231	3.43644	3.50736	0.0451958	0.0414145	0.0409765	0.0488759	0.0172536	0.0220425	3.42044	3.48394	3.48493	3.47027	3.52744	3.56983	0.0344859	0.0204176	0.0237605	0.0272792	0.0282842	0.0259122	3.20705	3.17968	3.27906	3.37557	3.30113	3.33593	0.030378	0.0503254	0.0329708	0.0644604	0.0340206	0.0254963	3.19681	3.24312	3.19906	3.31617	3.25807	3.4296	0.0344212	0.0254176	0.0748394	0.0231708	0.0402072	0.0393736
O-acetyl-serine	O-acetyl-serine (2TMS)	2.93653	3.09368	3.14711	2.95825	3.03985	3.23839	0.069347	0.0446334	0.0359224	0.117576	0.0606705	0.0468813	3.09204	3.08491	NA	3.02641	3.13056	3.31959	0.0445008	0.0117362	NA	0.0401269	0.088909	0.048916	3.23427	3.09101	3.01031	3.20276	3.22118	3.27745	0.0367048	0.0696257	0.0640286	0.0496906	0.0451959	0.0515753	3.2572	3.12684	NA	3.15113	3.22412	3.39803	0.0448434	0.0590892	NA	0.0389845	0.0591074	0.0741399
Octacosanoic acid	Octacosanoic acid (1TMS)	3.41369	3.26852	3.33152	3.48044	3.27825	3.25857	0.106462	0.09372	0.0784656	0.112413	0.0777623	0.0742408	3.2325	3.25113	3.2592	3.31163	3.32233	3.35502	0.0916394	0.0859401	0.0989973	0.07426	0.0916331	0.078541	3.40445	3.41674	3.13383	3.43061	3.28328	3.35499	0.11847	0.0851616	0.0560938	0.0657404	0.0608306	0.0668211	3.32609	3.32217	3.32663	3.27193	3.36168	3.3661	0.0824916	0.0856648	0.096097	0.0689108	0.0762658	0.0843609
Octadecanoic acid	Octadecanoic acid (1TMS)	4.61565	4.53409	4.52172	4.47205	4.50046	4.5373	0.0622048	0.0690852	0.0764282	0.0932456	0.0577633	0.0952079	4.57455	4.44158	4.47227	4.5657	4.56946	4.53503	0.0672046	0.0419316	0.10727	0.0671301	0.0797762	0.0973965	4.52963	4.63754	4.38036	4.55905	4.53233	4.59521	0.0851094	0.0669213	0.0558194	0.0992376	0.0666274	0.0781244	4.54901	4.52035	4.41794	4.5047	4.53708	4.55123	0.0615202	0.0570858	0.113652	0.0734201	0.0405104	0.0933374
Ornithine	Ornithine (4TMS)	3.46548	3.50246	3.59585	3.35155	3.3984	3.4124	0.0522183	0.0625895	0.0955488	0.0454203	0.0562394	0.0649084	3.54678	3.72272	3.58307	3.51789	3.52276	3.53392	0.0893591	0.117052	0.0898853	0.107676	0.0596606	0.0679896	3.87216	3.81888	3.5892	3.78366	3.76071	3.79327	0.0936804	0.0686264	0.0815572	0.11002	0.0634435	0.0276441	4.0078	3.86169	3.83645	3.84559	3.80565	3.76077	0.107779	0.0577047	0.109227	0.15508	0.0976556	0.0944548
Palmitic acid	Palmitic acid	4.06572	4.08994	4.10654	4.05575	4.0282	4.12148	0.0495991	0.0443958	0.0375555	0.0341798	0.0290509	0.048698	4.10824	4.08353	4.05825	4.08561	4.10048	4.11452	0.0558522	0.0294173	0.0475086	0.0375178	0.0508412	0.04455	4.08178	4.1297	4.02143	4.09672	4.08999	4.14468	0.0552656	0.0634366	0.02244	0.0376324	0.0282153	0.0506354	4.10551	4.09868	4.07713	4.08971	4.12166	4.13737	0.0330389	0.0332293	0.0531763	0.041009	0.0220237	0.0495357
Phenylalanine	Phenylalanine (2TMS)	4.15697	4.35144	4.55819	4.2206	4.1797	4.09104	0.0395452	0.0535192	0.077187	0.0366493	0.0859231	0.0709809	4.29358	4.51083	4.54744	4.28774	4.23863	4.26499	0.0274728	0.0237744	0.0745573	0.0826697	0.0612853	0.0766913	4.25575	4.42918	4.36395	4.33443	4.21826	4.14325	0.0453432	0.0638441	0.0614762	0.0740084	0.0797987	0.0556793	4.33507	4.51619	4.51028	4.38645	4.21315	4.34064	0.0406107	0.030333	0.0609595	0.0385533	0.0555169	0.080027
Phosphoric acid	Phosphoric acid (3TMS)	4.1449	4.14473	4.25588	4.13507	4.12878	4.1608	0.0812951	0.0893701	0.0637008	0.0584025	0.0570611	0.0412089	4.16529	4.10274	4.10873	4.11277	4.22997	4.14146	0.0605132	0.0551122	0.0734244	0.0489054	0.0734862	0.0309428	4.428	4.40356	4.31398	4.60733	4.49157	4.36161	0.101216	0.0526401	0.0665823	0.103874	0.0286011	0.0548001	4.42721	4.35859	4.41893	4.47488	4.40287	4.34221	0.0516677	0.0556692	0.0660675	0.0810601	0.0544641	0.0476361
Proline	Proline (2TMS)	5.46851	5.31637	5.37195	5.08071	5.08609	5.24521	0.0743881	0.0783669	0.0805123	0.0680181	0.0369455	0.0662498	5.51308	5.48785	5.4987	5.1419	5.09935	5.31239	0.089409	0.0291042	0.0738303	0.0902637	0.105611	0.105128	5.34107	5.27085	5.13534	4.92569	4.86871	4.83524	0.0618424	0.0417377	0.0355086	0.0358934	0.0200313	0.0368547	5.35836	5.33214	5.16561	4.94887	4.84581	4.84471	0.0496623	0.0538249	0.0496063	0.0516622	0.0296346	0.0581055
Putrescine	Putrescine (4TMS)	4.11961	4.28836	4.31001	4.26655	4.14514	4.16377	0.173703	0.0658976	0.0840219	0.0504163	0.0475916	0.0675169	4.41308	4.48236	4.26431	4.40366	4.38434	4.41074	0.0818207	0.0516469	0.125913	0.0491041	0.0758904	0.142427	4.34679	4.33091	4.06072	4.46267	4.37971	4.3919	0.0789421	0.040361	0.104155	0.0770014	0.0406391	0.0788489	4.51766	4.41852	4.29998	4.48185	4.46917	4.73593	0.0716094	0.0482073	0.0754903	0.0246272	0.0658482	0.109274
Pyroglutamic acid	Pyroglutamic acid (2TMS)	4.72789	4.84818	4.8855	4.55226	4.56335	4.6557	0.0418281	0.0569909	0.058482	0.0391484	0.0526154	0.0447488	4.89073	4.85189	4.89373	4.58478	4.6898	4.71106	0.0559292	0.0362113	0.0544102	0.0405084	0.0699066	0.0346738	4.82173	4.84906	4.79151	4.70989	4.732	4.70166	0.054285	0.0443048	0.0313748	0.0755614	0.046673	0.0367151	4.89922	4.92115	4.91625	4.71831	4.74499	4.73507	0.0301603	0.0289958	0.0265183	0.0234692	0.0411962	0.0468164
Pyruvic acid	Pyruvic acid (1MEOX) (1TMS)	3.99214	3.83281	3.83882	3.66265	3.94079	4.10501	0.0107521	0.0279801	0.0198605	0.0336546	0.0286677	0.029635	3.95119	3.90714	3.90948	3.72817	4.1669	4.07959	0.0269643	0.0152002	0.0285072	0.0304355	0.0300296	0.0154738	4.1674	4.05905	3.85372	3.77874	4.19932	4.29542	0.0276243	0.0203197	0.0304375	0.00941466	0.0305513	0.0313989	4.1232	4.01815	3.97288	3.80516	4.32356	4.33487	0.0257045	0.010911	0.0184968	0.0163595	0.0296651	0.0555491
Raffinose	Raffinose	4.54788	4.17521	3.95565	3.31254	3.48124	4.33562	0.0926217	0.0997459	0.0800038	0.266506	0.132989	0.140604	4.41222	4.23553	3.8116	3.41289	3.77318	4.39528	0.153748	0.0836421	0.109785	0.109898	0.188111	0.0642817	4.07352	3.93143	3.44115	3.08327	3.13464	3.8419	0.120983	0.134904	0.127293	0.137332	0.120089	0.0833748	3.75448	3.90914	3.28946	3.0677	3.40374	3.86787	0.0806376	0.0977806	0.0972567	0.167173	0.0644893	0.105236
Ribonic acid	Ribonic acid (5TMS)	2.43766	2.3875	2.50712	2.37564	2.38457	2.49925	0.0221936	0.0409943	0.0401037	0.0833314	0.0415591	0.0561854	2.43127	2.46759	2.50386	2.45005	2.55478	2.51788	0.0601229	0.0335104	0.0657354	0.0443762	0.0192467	0.0293878	2.32691	2.26562	2.27336	2.26386	2.34344	2.3163	0.046624	0.0344863	0.0513965	0.0459568	0.0490256	0.0412772	2.25607	2.32224	2.37263	2.30369	2.26996	2.51818	0.0562295	0.0392831	0.0583986	0.0307876	0.0583109	0.0659874
Ribose	Ribose (1MEOX) (4TMS) MP	3.63047	3.67788	3.69568	3.59586	3.62578	3.71828	0.0660136	0.0323279	0.0582579	0.0952149	0.0416627	0.0421158	3.74965	3.74131	3.74527	3.64275	3.73689	3.72292	0.0351204	0.0343287	0.0998223	0.0502016	0.0535522	0.0532684	3.76059	3.70718	3.60901	3.65519	3.64771	3.674	0.0305774	0.0427155	0.0548343	0.0464764	0.0552083	0.0390729	3.7544	3.65911	3.55257	3.69922	3.64028	3.70996	0.0440612	0.0565846	0.102464	0.0409127	0.0551935	0.0497692
Serine	Serine (3TMS)	5.14259	5.27144	5.40423	4.97746	5.11048	5.34208	0.0390186	0.048797	0.0385862	0.0231333	0.0255341	0.0338369	5.35998	5.44604	5.40413	5.0447	5.23574	5.38862	0.0506561	0.0505164	0.0515876	0.0315656	0.0442058	0.0542254	5.3735	5.40719	5.29791	5.2253	5.37178	5.48768	0.0618804	0.0346708	0.0354608	0.0525278	0.0412612	0.0229519	5.55262	5.49688	5.45524	5.26319	5.37056	5.43979	0.0358196	0.0336702	0.0344639	0.0719243	0.0624171	0.0635475
Serine	Serine (4TMS)	3.48544	3.52854	3.72541	3.46995	3.48224	3.71592	0.140271	0.108762	0.0990228	0.0910171	0.101608	0.0659683	3.52307	3.72239	3.79438	3.52358	3.57719	3.65463	0.0859217	0.0967418	0.11987	0.0873955	0.120025	0.112941	3.6166	3.63957	3.41687	3.54869	3.62106	3.644	0.126771	0.109333	0.113923	0.0954865	0.0871234	0.0418451	3.77592	3.6152	3.6378	3.56631	3.6087	3.63775	0.0821756	0.105112	0.111472	0.0842735	0.0879365	0.109668
Shikimic acid	Shikimic acid (4TMS)	4.26186	4.1752	4.05144	3.88168	4.1492	4.443	0.0425743	0.0252631	0.0360384	0.0701221	0.0565804	0.0625282	4.26941	4.17521	4.09026	3.90536	4.31923	4.40902	0.0478795	0.029446	0.0895529	0.0282338	0.0763291	0.0423446	4.28137	4.19434	3.95562	3.99869	4.33757	4.39114	0.0435637	0.0349457	0.0531302	0.0346881	0.0388414	0.0581852	4.24239	4.11972	4.00408	3.94878	4.33935	4.48713	0.0240208	0.0384633	0.0684236	0.0516815	0.0430197	0.059618
Similar to cellobiose	Similar to cellobiose (1MEOX) (8TMS) MP	2.73344	2.54043	2.59306	2.44292	2.52847	2.67767	0.0245071	0.0604884	0.0486685	0.155826	0.0340819	0.0789642	2.64609	2.57617	2.62709	2.5646	2.62348	2.70447	0.0351546	0.0561044	0.0831317	0.0284655	0.079995	0.0495989	2.86964	2.82277	2.49474	2.736	2.66822	2.71583	0.0260672	0.0195076	0.0782336	0.0745991	0.0627905	0.0361454	2.71374	2.74181	2.65719	2.59571	2.66584	2.75447	0.0316796	0.0592865	0.0593506	0.0428755	0.0629657	0.114611
Similar to L-Glutamine	Similar to L-Glutamine	3.00335	2.9954	3.02796	2.79996	2.86582	3.03134	0.0739164	0.104075	0.0582301	0.0334842	0.0505366	0.0742583	3.05037	3.03367	2.98001	2.93014	3.05933	3.14049	0.0774731	0.0727591	0.117479	0.0480589	0.0910866	0.0854687	3.22254	3.14316	2.93164	3.13753	3.13774	3.23279	0.0397448	0.1023	0.110942	0.144639	0.0534978	0.0590719	3.21542	3.1169	3.07527	2.96764	3.17878	3.33775	0.0579625	0.0646726	0.112737	0.0505915	0.0558507	0.0917924
Similar to Uric acid	Similar to Uric acid (4TMS)	3.45682	3.42787	3.57045	3.43014	3.39415	3.419	0.0615645	0.0386831	0.0381515	0.0347185	0.0214967	0.0328595	3.50222	3.54618	3.56577	3.4981	3.47348	3.56994	0.0570964	0.023836	0.0519433	0.0345869	0.0486497	0.0464301	3.47279	3.59527	3.47883	3.52785	3.54956	3.41933	0.0335394	0.0174204	0.0330361	0.0158988	0.0481364	0.0421731	3.47264	3.53514	3.65691	3.55281	3.59575	3.58781	0.04212	0.0321422	0.0181086	0.0234541	0.0181413	0.0920102
Similar to Uridine-5-diphosphoglucose disodium salt	Similar to Uridine-5-diphosphoglucose disodium salt	5.14135	5.08943	5.17491	5.06441	5.03253	5.04938	0.0949586	0.0450574	0.0694231	0.0374853	0.0397158	0.0662405	5.22245	5.11267	5.11704	5.04101	5.17855	5.2141	0.0874774	0.0342574	0.102964	0.0339259	0.0990893	0.0659106	5.52943	5.54799	5.45973	5.55933	5.52678	5.53437	0.0775817	0.0335097	0.0380472	0.0428711	0.0407107	0.0379741	5.61709	5.64256	5.53029	5.5967	5.58365	5.61415	0.0407157	0.0328248	0.0408698	0.0270375	0.0301932	0.0985928
Sinapic acid (cis)	Sinapic acid (cis)	4.2733	4.17857	4.26441	4.14541	4.12596	4.22987	0.0460765	0.0406753	0.0334004	0.0579828	0.0361584	0.0444571	4.23755	4.20224	4.27959	4.22278	4.27498	4.24384	0.045208	0.0155591	0.0502813	0.0416031	0.0574439	0.0326991	4.31049	4.29937	4.16494	4.23296	4.22919	4.19507	0.0446123	0.0437429	0.0415882	0.0390264	0.0408364	0.0326431	4.26264	4.28713	4.27464	4.24198	4.26808	4.24168	0.0318957	0.0410162	0.0472562	0.0242793	0.0301702	0.0576969
Sinapic acid (trans)	Sinapic acid (trans)	4.02324	4.00862	4.06101	3.94361	3.90347	4.03031	0.060542	0.0449798	0.0524176	0.0570906	0.0552199	0.0482513	4.03575	4.08801	3.99333	4.00065	4.02203	4.03398	0.0508641	0.0496608	0.0877582	0.0445321	0.0938793	0.0644011	4.01347	4.13837	3.96021	3.97096	3.98358	4.0287	0.0493788	0.0315609	0.0724169	0.0570193	0.0570833	0.028839	4.06098	4.08594	4.0323	4.05183	4.02678	4.042	0.0372914	0.0278055	0.0879115	0.0446821	0.0338586	0.0751654
Sorbose	Sorbose (1MEOX) (5TMS) BP	4.37145	4.33694	4.13483	4.1568	5.13076	5.40509	0.0435215	0.0627671	0.0573538	0.0593376	0.0913179	0.135596	4.3733	4.28487	4.1776	4.22139	5.29043	5.14982	0.091851	0.0303496	0.121201	0.0482695	0.108276	0.0890612	4.7328	4.6719	4.35751	4.75472	5.49153	5.35872	0.0775821	0.0943631	0.0554361	0.0617619	0.0518751	0.0921582	4.70124	4.63175	4.4245	4.61251	5.39789	5.51525	0.0488509	0.0526901	0.106258	0.0633986	0.0780729	0.0700508
Spermidine	Spermidine (5TMS)	3.97545	4.16053	4.17865	3.87038	3.84663	4.17614	0.281975	0.0487405	0.0898333	0.0667349	0.131253	0.0942094	4.18901	4.22264	3.82587	3.93841	4.2268	3.67808	0.049329	0.049547	0.337947	0.0786567	0.0686405	0.241895	4.19698	4.2458	3.69978	4.04433	4.19346	4.16091	0.144615	0.0766682	0.299828	0.0574485	0.0709108	0.0846082	4.15961	4.15617	4.08642	4.05928	4.13212	4.12047	0.13625	0.0690083	0.0944598	0.0461316	0.101848	0.186359
Succinic acid	Succinic acid (2TMS)	3.87232	3.79752	3.76933	3.68092	3.66354	3.82899	0.0174961	0.0227584	0.039722	0.0769303	0.0458093	0.0312819	3.83152	3.79341	3.8366	3.68839	3.71192	3.89377	0.0227614	0.0575222	0.0282603	0.0460611	0.0374067	0.0395863	3.93196	3.87492	3.78415	3.70343	3.66922	3.87905	0.0385791	0.0302983	0.0540245	0.0597406	0.0374095	0.0396512	3.85792	3.82868	3.7165	3.58427	3.68395	4.15072	0.0257022	0.0379291	0.0621385	0.0559634	0.0306558	0.0495769
Sucrose	Sucrose (8TMS)	4.27154	4.33536	4.34819	4.28825	4.30734	4.50403	0.042362	0.0416795	0.043102	0.0748417	0.0450734	0.018888	4.20409	4.37672	4.34169	4.27617	4.49278	4.52602	0.0605485	0.0229916	0.046752	0.0328269	0.0223707	0.00665442	4.29724	4.38358	4.11604	4.3614	4.4091	4.48221	0.0360959	0.0252531	0.0604963	0.0478555	0.0260243	0.0199404	4.14801	4.31134	4.28199	4.28623	4.47608	4.50385	0.0192164	0.0267865	0.0343325	0.0457401	0.00809004	0.0331652
Tetracosanoic acid	Tetracosanoic acid (1TMS)	3.59187	3.49317	3.53675	3.56307	3.46264	3.46142	0.121569	0.118091	0.102449	0.107243	0.0942341	0.106437	3.52912	3.37837	3.44235	3.51318	3.51831	3.5584	0.107727	0.0770194	0.141775	0.0920941	0.103054	0.120585	3.56803	3.62794	3.36807	3.62859	3.50711	3.58985	0.122364	0.107203	0.0569735	0.0924811	0.0615668	0.100247	3.53058	3.52695	3.53221	3.50862	3.62283	3.58335	0.0857481	0.0908346	0.11435	0.0962721	0.0874197	0.117039
Tetradecanoic acid	Tetradecanoic acid (1TMS)	2.69618	2.70788	2.73986	2.72336	2.70385	2.7427	0.044726	0.0278504	0.0538114	0.0530868	0.0308414	0.063086	2.7444	2.73975	2.69864	2.73448	2.74422	2.73856	0.0435531	0.0143291	0.0526487	0.0389113	0.0486755	0.0610893	2.76496	2.76469	2.66531	2.78152	2.76199	2.91057	0.0521636	0.0223582	0.0365211	0.038868	0.0505954	0.111847	2.73059	2.74309	2.74036	2.75391	2.76289	2.76853	0.0370824	0.0480454	0.0505563	0.0464439	0.054504	0.0460484
Threonic acid	Threonic acid (4TMS)	3.42053	3.51299	3.4307	3.63643	3.35562	3.36683	0.0429148	0.0360942	0.0272533	0.0311026	0.0261619	0.0381501	3.43397	3.39677	3.45322	3.59434	3.36262	3.47143	0.0387634	0.019352	0.0377667	0.040443	0.0368931	0.0388528	3.39837	3.37484	3.35587	3.71403	3.32247	3.48465	0.0272113	0.0293255	0.0362126	0.0595813	0.0372741	0.0362495	3.42395	3.40296	3.32907	3.70587	3.43508	3.53875	0.0220756	0.027134	0.0448729	0.0402315	0.0404191	0.0477741
Threonine	Threonine (3TMS)	4.89447	4.85856	4.96651	4.7636	4.71992	4.8211	0.044457	0.0602103	0.0269738	0.043231	0.0150075	0.0170864	4.97811	5.00469	4.98873	4.8472	4.85727	4.9057	0.0423578	0.0305466	0.0218213	0.0356712	0.0417046	0.0399091	5.00328	5.04051	4.9678	5.02266	4.9683	4.92682	0.0345972	0.0230303	0.0275797	0.0419535	0.0282866	0.0218655	5.11303	5.13277	5.1278	5.05671	4.96805	4.97038	0.0223737	0.0219346	0.0342973	0.0496716	0.044829	0.0601222
Tryptophan	Tryptophan (3TMS)	3.30661	3.45122	3.67439	3.42837	3.3756	3.2416	0.0759515	0.0939064	0.0812687	0.0578403	0.125809	0.119593	3.42977	3.57162	3.56028	3.40957	3.40373	3.56661	0.0714838	0.0831542	0.0695693	0.0518749	0.106298	0.0995752	3.33781	3.69822	3.52838	3.67487	3.47206	3.42645	0.0710983	0.0534771	0.0998086	0.0980065	0.0539141	0.0785975	3.46198	3.70164	3.68014	3.55348	3.38913	3.6013	0.0460424	0.0836852	0.106317	0.0519579	0.0491908	0.0921291
Tyramine	Tyramine (3TMS)	3.27796	3.26057	3.29895	3.21577	3.12441	3.17749	0.0547784	0.0533447	0.0444598	0.0640933	0.0146412	0.0549913	3.36478	3.29686	3.25014	3.23407	3.25963	3.21819	0.0589481	0.0410218	0.078574	0.0399552	0.0821432	0.0683672	3.34638	3.36288	3.1428	3.31494	3.26916	3.21349	0.0470084	0.0458902	0.0789063	0.0989914	0.0245883	0.0288258	3.37394	3.33299	3.25403	3.25563	3.26236	3.2935	0.0398753	0.0545683	0.0690042	0.0449936	0.0369156	0.0902399
Tyrosine	Tyrosine (3TMS)	4.00587	4.21276	4.42087	4.08715	4.01993	3.77831	0.0563289	0.0628674	0.0802101	0.0349692	0.108999	0.0962396	4.12263	4.39489	4.40321	4.09399	3.99131	3.85246	0.0348406	0.0207787	0.096283	0.0812356	0.0729941	0.102584	4.02243	4.36503	4.17625	4.23719	4.05584	3.79448	0.0504995	0.0503654	0.0710963	0.0868885	0.100606	0.0803339	4.07898	4.37481	4.35151	4.21791	3.9022	3.90179	0.0518808	0.0505745	0.0929086	0.0292607	0.0499766	0.0966425
Unknown (sugar) 20	Unknown (sugar) 20	4.45118	3.8432	4.24	3.65913	3.91018	4.4049	0.0720126	0.0692055	0.0398806	0.111116	0.144862	0.101926	4.1299	3.99689	4.21231	4.04541	3.98539	4.50241	0.100009	0.0643976	0.0786962	0.0906179	0.173572	0.0531751	4.32996	4.20337	3.61467	4.04662	4.0763	3.97961	0.0268256	0.0495522	0.131496	0.110547	0.089756	0.0695777	4.02541	3.9837	4.14439	3.80571	3.99839	3.93015	0.054596	0.0718053	0.04216	0.0883527	0.101216	0.116578
Unknown 01	Unknown 01	4.41373	4.38873	4.48811	4.59902	4.50916	4.49233	0.135064	0.111922	0.0917736	0.0109363	0.0808652	0.0803428	4.40042	4.43605	4.46892	4.5009	4.49339	4.52125	0.127366	0.0993513	0.106463	0.0983644	0.0802194	0.078054	4.35665	4.42085	4.47884	4.58968	4.50841	4.49737	0.155056	0.109474	0.0914103	0.082787	0.0720142	0.0761073	4.43782	4.46054	4.57665	4.50984	4.50948	4.54289	0.113195	0.0946073	0.0567636	0.0988891	0.0890699	0.0652453
Unknown 02	Unknown 02	3.87167	3.88274	3.82948	3.78353	3.80827	3.82008	0.0773381	0.0243316	0.0402603	0.0920574	0.0611428	0.0290045	3.88584	3.82851	3.87477	3.67039	3.84329	3.88377	0.0515642	0.0290928	0.0454205	0.0423416	0.0468955	0.0299506	3.8835	3.72906	3.73626	3.7103	3.73083	3.81584	0.0184223	0.0492617	0.0751273	0.0459856	0.048012	0.0500889	3.74447	3.78296	3.66206	3.76905	3.73781	3.898	0.0348426	0.0538906	0.0642856	0.0351206	0.0423054	0.0358115
Unknown 03	Unknown 03	2.76149	2.79965	2.70097	2.82483	2.7594	2.66276	0.0628932	0.050856	0.0249705	0.0690223	0.0655285	0.0340146	2.76537	2.75965	2.7874	2.68932	2.72468	2.71487	0.054887	0.0216041	0.0648199	0.0476105	0.0310032	0.0400062	2.68894	2.63545	2.71426	2.616	2.598	2.76024	0.0384791	0.0232073	0.0533479	0.0303371	0.0320667	0.0407274	2.71422	2.73076	2.58695	2.7682	2.73913	2.94552	0.0356648	0.0401778	0.0684452	0.0386344	0.0408058	0.0343781
Unknown 04	Unknown 04	3.71416	3.63154	3.63091	3.53369	3.55138	3.62477	0.105459	0.0992549	0.0464483	0.0788922	0.0916425	0.077368	3.70942	3.72814	3.83555	3.64294	3.73545	3.72533	0.0539544	0.0532719	0.0721375	0.0619922	0.0797912	0.0607019	3.32099	3.34972	3.11004	3.30134	3.256	3.25202	0.0445648	0.0513379	0.0837364	0.0454085	0.0698344	0.0705746	3.19978	3.32436	3.14054	3.23856	3.21341	3.28751	0.0694096	0.0639338	0.0804791	0.0408185	0.0895868	0.138345
Unknown 06	Unknown 06	2.92524	3.21128	2.94907	3.18881	3.02469	2.94296	0.0508669	0.161874	0.0725715	0.173759	0.0777788	0.0678268	3.06628	3.0238	3.1094	3.45775	2.91749	3.02009	0.0350279	0.0311615	0.0329486	0.234454	0.0391105	0.101791	3.09293	2.96017	3.00317	3.24538	3.0669	3.19398	0.081249	0.0764314	0.050872	0.179572	0.0460884	0.0600167	3.12873	3.04303	2.97078	3.49247	3.05361	3.06109	0.0641451	0.0464449	0.0666897	0.234436	0.072714	0.0412934
Unknown 08	Unknown 08	2.99798	3.0803	3.02633	2.95322	2.98418	3.06445	0.0501662	0.0567765	0.0469957	0.0334526	0.0264245	0.0549815	3.04801	3.05002	3.03839	3.04894	3.21847	3.10466	0.076861	0.0257115	0.0815622	0.0379421	0.0679671	0.0624854	2.97383	3.04435	2.96983	3.09274	2.99396	3.10139	0.0537163	0.0525686	0.0501215	0.0574591	0.0458742	0.0388296	3.03116	2.98934	2.96876	3.01216	3.03748	3.06765	0.0360168	0.0277367	0.0630484	0.0346282	0.0283136	0.0367919
Unknown 11 (RI 712900)	Unknown 11 (RI 712900)	4.06644	3.9718	4.03536	3.93269	3.88025	4.04857	0.0497677	0.0163299	0.0410566	0.0813045	0.0444397	0.0617527	4.08105	4.06965	4.07327	3.96451	4.06128	4.07425	0.027407	0.0360835	0.0701826	0.040879	0.0604199	0.0429334	4.0698	4.11634	3.87025	3.94138	3.97989	4.01304	0.0700429	0.0244479	0.0756416	0.0381331	0.0403701	0.0360414	4.0477	4.00886	3.96578	4.00489	3.99308	4.036	0.0319728	0.0420535	0.0911017	0.0419543	0.0400861	0.0766094
Unknown 12	Unknown 12	3.79125	3.71316	3.73117	3.61187	3.60743	3.77287	0.0496214	0.0297193	0.0458595	0.0691164	0.0310055	0.0713524	3.75862	3.76504	3.78182	3.69973	3.80354	3.81113	0.0388775	0.042225	0.0772497	0.0441159	0.0646466	0.0560161	3.74045	3.83652	3.56713	3.69811	3.74124	3.75277	0.0519369	0.0332067	0.0693209	0.0455674	0.0514654	0.0490998	3.7391	3.76304	3.70114	3.73651	3.77112	3.7959	0.0335592	0.0456786	0.086494	0.0421858	0.0416451	0.0816243
Unknown 13	Unknown 13	4.29079	4.0711	4.08169	3.86127	3.82052	3.88179	0.0517783	0.0748748	0.0417761	0.0503716	0.0451244	0.0454091	4.16952	4.09006	4.08036	3.90674	4.05701	4.54963	0.0311926	0.0767785	0.0593165	0.026056	0.0877666	0.0752544	4.25561	4.21772	3.88068	3.91486	3.86406	3.9422	0.0489479	0.0548247	0.0706554	0.0651926	0.0589537	0.0665272	4.21198	4.14661	4.02558	3.93899	4.06701	4.35749	0.0377285	0.039446	0.0660973	0.0625349	0.0602591	0.142341
Unknown 16	Unknown 16	3.76891	3.62507	3.71692	3.63005	3.61755	3.71069	0.0266669	0.0446504	0.041679	0.107659	0.0259855	0.0634096	3.72983	3.67186	3.74095	3.69694	3.76246	3.76724	0.0302581	0.0425403	0.0617381	0.038785	0.0615206	0.0471389	3.7021	3.65811	3.44036	3.60695	3.59754	3.6195	0.0289935	0.0545994	0.0715175	0.0319918	0.0474431	0.044359	3.63709	3.65572	3.60638	3.63236	3.60958	3.64962	0.0386768	0.0498105	0.0865701	0.0381219	0.0489091	0.0731718
Unknown 17	Unknown 17	3.85086	3.6617	3.70909	3.59573	3.65241	3.61967	0.0501414	0.060119	0.0333436	0.108316	0.0289328	0.0662797	3.83287	3.69055	3.79298	3.70668	3.789	3.77566	0.038214	0.0449284	0.0829895	0.0345848	0.0673968	0.0671082	3.80065	3.77694	3.47423	3.6465	3.67542	3.59234	0.0298448	0.0576863	0.0600979	0.0781468	0.0775744	0.0547783	3.71311	3.75915	3.6762	3.62998	3.65514	3.68623	0.0513352	0.0484031	0.0566682	0.0373953	0.0490442	0.092975
Unknown 18	Unknown 18	3.72312	3.60048	3.60919	3.3238	3.48241	3.58937	0.0639212	0.11537	0.106043	0.168248	0.0913577	0.144184	3.71469	3.57682	3.62756	3.54033	3.66678	3.69862	0.0821227	0.115925	0.136436	0.1157	0.118295	0.115489	3.86103	3.84319	3.62541	3.70449	3.70091	3.81631	0.033004	0.0946906	0.125378	0.155102	0.116353	0.0771125	3.7603	3.83279	3.63786	3.66404	3.79183	3.81097	0.0775248	0.0782395	0.0772131	0.109135	0.116006	0.0994485
Unknown 284200	Unknown 284200	5.09825	5.08264	5.08835	5.08317	5.11105	5.0956	0.0244237	0.0271253	0.0137289	0.0356419	0.026477	0.0290714	5.05236	5.06949	5.12261	5.05871	5.09969	5.07344	0.026326	0.0277265	0.00196416	0.0409622	0.0189702	0.0281123	5.06254	5.05775	5.1191	5.1116	5.10394	5.08573	0.0314085	0.025036	0.0097668	0.0452953	0.0195431	0.0198596	5.03858	5.06714	5.05855	5.07363	5.05949	5.09764	0.0236286	0.0246517	0.0321517	0.0466799	0.0413764	0.022116
Unknown 521800	Unknown 521800	2.99198	3.054	2.98009	2.90118	2.96324	3.04032	0.081039	0.076062	0.071567	0.0330639	0.0594959	0.0751517	3.08051	3.15404	2.97148	3.00522	3.00881	3.1379	0.0789026	0.0721035	0.103068	0.0370771	0.0857064	0.0854213	3.16572	3.12123	2.97417	3.05397	3.1114	3.26939	0.0723694	0.0476421	0.075165	0.127208	0.0491861	0.042958	3.30303	3.13771	3.0525	2.99978	3.20619	3.35682	0.0498383	0.0507613	0.0871615	0.0380755	0.0638206	0.0912677
Unknown 640400	Unknown 640400	2.86314	2.99541	3.28204	2.98455	2.93953	2.92385	0.103462	0.105862	0.0816144	0.0638832	0.0783084	0.060886	3.04683	3.13322	3.24486	3.18351	3.01678	2.94306	0.105143	0.0987667	0.105603	0.114476	0.123845	0.104507	2.94619	3.10196	3.11392	3.25429	3.16995	3.07118	0.0471883	0.0828648	0.0987624	0.163357	0.113426	0.0839401	3.02263	3.09502	3.20424	3.28892	3.08617	3.03927	0.0815773	0.0755471	0.0917582	0.0859619	0.0899484	0.114991
Uracil	Uracil (2TMS)	3.34217	3.29979	3.2399	3.17798	3.33578	3.27539	0.0540863	0.0846636	0.0536323	0.0577519	0.0434168	0.0512311	3.37149	3.45601	3.23671	3.24816	3.33232	3.29357	0.038387	0.0315907	0.0543898	0.044307	0.038672	0.0415752	3.33045	3.48487	3.38328	3.4106	3.35079	3.18037	0.0598133	0.0677782	0.0449648	0.0253853	0.0243733	0.042691	3.34352	3.49379	3.31558	3.39834	3.22061	3.27847	0.0627046	0.0619067	0.0395243	0.0362836	0.0317236	0.0204344
Valine	Valine (2TMS)	4.83541	4.9401	5.14126	4.8848	4.80694	4.74121	0.0235601	0.046549	0.0435178	0.0386611	0.0691446	0.0700365	4.92806	5.19742	5.13414	4.8912	4.78499	4.89375	0.0222486	0.0427569	0.0446797	0.0625949	0.0342317	0.0558768	4.84214	5.01975	4.959	4.97386	4.81193	4.74126	0.0263635	0.0382076	0.0417949	0.0651301	0.0585987	0.0416146	4.94609	5.15178	5.14383	4.9945	4.77999	4.94652	0.0266152	0.0507994	0.0513998	0.0495626	0.0388529	0.0768624
[truncated: 12 more columns]
