# Supplementary material for: Transcriptomic and Metabolomic Analysis of a Pseudomonas-Resistant versus a Susceptible Arabidopsis Accession
Source: Int J Mol Sci. 2022 Oct 11;23(20):12087. doi: 10.3390/ijms232012087 (PMC9603445; doi:10.3390/ijms232012087)
Supplement: Supplementary file 1 [file ijms-23-12087-s001.zip › Supplemental Table S3.xlsx]

## Sheet: All analytes
Supplemental Table 3: Secondary metabolite profiles in Col-0 and C24 after Pst infection: Plants were either sprayed with Pst (Pst infection) or MgCl2 solution (mock treatment) and samples taken after 2h, 4h, 8h, 16, 24h, and 48h. Secondary metabolite profiles were measured using LC‒MS and analyzed using REFINER MSH 5.3 (GeneData, http://www.genedata.com). Metabolites were annotated using an in-h…
	Averages						Standard error						Averages						Standard error						Averages						Standard error						Averages						Standard error						C24-Col
Peak identifier	Col-0 mock 2h	Col-0 mock 4h	Col-0 mock 8h	Col-0 mock 16h	Col-0 mock 24h	Col-0 mock 48h	Col-0 mock 2h	Col-0 mock 4h	Col-0 mock 8h	Col-0 mock 16h	Col-0 mock 24h	Col-0 mock 48h	Col-0 Pst 2h	Col-0 Pst 4h	Col-0 Pst 8h	Col-0 Pst 16h	Col-0 Pst 24h	Col-0 Pst 48h	Col-0 Pst 2h	Col-0 Pst 4h	Col-0 Pst 8h	Col-0 Pst 16h	Col-0 Pst 24h	Col-0 Pst 48h	C24 mock 2h	C24 mock 4h	C24 mock 8h	C24 mock 16h	C24 mock 24h	C24 mock 48h	C24 mock 2h	C24 mock 4h	C24 mock 8h	C24 mock 16h	C24 mock 24h	C24 mock 48h	C24 Pst 2h	C24 Pst 4h	C24 Pst 8h	C24 Pst 16h	C24 Pst 24h	C24 Pst 48h	C24 Pst 2h	C24 Pst 4h	C24 Pst 8h	C24 Pst 16h	C24 Pst 24h	C24 Pst 48h	2
pol_neg_1003	5.47824	5.46337	5.43552	5.91042	5.53903	5.50197	0.0354559	0.0430165	0.0618665	0.0343669	0.0223624	0.0326063	5.4707	5.39389	5.27507	5.90061	5.51546	5.63764	0.0605806	0.0442385	0.0677598	0.0252069	0.0651725	0.0162958	5.61719	5.67908	5.49921	6.00261	5.62438	5.51988	0.0392087	0.0351489	0.0496631	0.0200788	0.0213812	0.0268536	5.49362	5.5743	5.54522	5.90813	5.53681	5.53137	0.048273	0.0461264	0.0323373	0.0236303	0.0348645	0.044794
pol_neg_10291	5.98948	6.09236	6.06634	6.14392	5.96275	6.00961	0.0326905	0.0392053	0.0303816	0.0549696	0.0579247	0.0287567	6.1141	6.13468	6.17228	6.02487	6.15526	6.11923	0.0648443	0.0518697	0.0650448	0.0825666	0.0573432	0.037657	7.37333	7.34248	7.40412	7.39413	7.34833	7.41798	0.0449347	0.0332818	0.0295601	0.0393224	0.0268138	0.0312403	7.41753	7.40057	7.4264	7.41302	7.41113	7.44623	0.0375252	0.0470293	0.0331269	0.0259324	0.0342053	0.0395541	1.38385
pol_neg_10334	6.32098	6.43795	6.45569	6.57256	6.52428	6.52421	0.0281081	0.0301653	0.032744	0.0189281	0.0820006	0.0443196	6.46516	6.45291	6.64095	6.63521	6.79821	6.63401	0.0780451	0.0524713	0.0527059	0.06004	0.0570185	0.0540758	6.6048	6.64357	6.77946	6.82856	6.78987	6.9163	0.0583856	0.0245077	0.0388369	0.0534188	0.0275073	0.0345932	6.61592	6.71504	6.80275	6.91079	6.90733	6.93621	0.0535251	0.0550287	0.0500903	0.0258176	0.0436974	0.0415953	0.283814
pol_neg_10335	6.24063	6.2557	6.21142	6.07243	6.11755	5.98699	0.148198	0.116712	0.0868224	0.0855023	0.123333	0.0899117	6.31142	5.95168	6.19111	6.24656	6.24606	6.21423	0.207394	0.0688286	0.11344	0.133281	0.0550458	0.059976	5.58306	5.47585	5.78459	5.73632	5.45582	5.8106	0.055596	0.0584586	0.0990856	0.112348	0.0760779	0.080698	5.70045	5.58805	5.58375	5.53415	5.61761	5.83212	0.131782	0.0683897	0.0681971	0.0638626	0.0946667	0.0762581	-0.657568
pol_neg_10369	5.78972	5.879	5.81178	5.87188	5.77056	5.76732	0.0332795	0.0288621	0.0603722	0.0420716	0.0851579	0.0359636	5.90964	5.8481	5.92091	5.82968	6.02374	5.94816	0.0834622	0.0533681	0.0800876	0.0655439	0.0637108	0.0575171	6.84859	6.82567	6.94158	6.95488	6.85693	6.99016	0.0591574	0.0493027	0.0473781	0.0442823	0.0287764	0.0454734	6.87248	6.94611	6.95951	6.95292	6.9283	6.98173	0.0571871	0.0560856	0.0544692	0.0446877	0.0449235	0.0594804	1.05887
pol_neg_10387	4.35075	4.25354	4.38678	4.36505	4.36972	4.12197	0.0433496	0.0757835	0.0753996	0.0680825	0.0604876	0.0770527	4.24326	4.25136	3.78495	4.38997	4.16158	4.13164	0.0826379	0.0650279	0.233099	0.0546194	0.0935572	0.0934058	3.96027	4.03684	4.13139	3.82	4.00476	4.10126	0.0682477	0.0483131	0.00723482	0.230303	0.0213279	0.0259993	4.07252	3.92797	4.04935	3.73113	3.95267	3.88403	0.0346841	0.056768	0.0399115	0.214163	0.0548544	0.0645428
pol_neg_10444	2.97885	3.31579	3.26354	3.50135	3.25706	3.13773	0.179143	0.136062	0.100794	0.108059	0.0684135	0.109702	3.19886	3.40548	3.54068	3.32116	3.49021	3.4294	0.314637	0.159818	0.135767	0.139377	0.11832	0.0992027	5.07588	5.04838	5.10701	5.09114	5.04374	5.11723	0.0505406	0.0369622	0.0313987	0.0407556	0.0312581	0.0321238	5.11677	5.10826	5.12198	5.10634	5.11959	5.16071	0.0375709	0.0488976	0.0361325	0.0302559	0.0385402	0.0387641	2.09703
pol_neg_10483	NA	NA	NA	NA	NA	NA	NA	NA	NA	NA	NA	NA	NA	NA	NA	NA	NA	NA	NA	NA	NA	NA	NA	NA	4.43097	4.42997	4.51773	4.54014	4.48708	4.52098	0.0728529	0.0613392	0.0642928	0.0586806	0.0560993	0.0764765	4.46891	4.47318	4.53351	4.52904	4.51205	4.47808	0.0760722	0.0668154	0.0675893	0.0751558	0.0608578	0.0730247
pol_neg_10736	NA	NA	NA	NA	NA	NA	NA	NA	NA	NA	NA	NA	NA	NA	NA	NA	NA	NA	NA	NA	NA	NA	NA	NA	4.52509	4.47188	4.51486	4.44993	4.41153	4.49156	0.0215963	0.0179157	0.0228874	0.0285887	0.0354795	0.026876	4.60206	4.52334	4.51298	4.51371	4.51584	4.6049	0.0327214	0.0310525	0.0286688	0.0261056	0.0173343	0.0543796	#VALUE!
pol_neg_10772	6.6652	6.7447	6.70351	6.75863	6.61945	6.6138	0.036958	0.0340533	0.0598561	0.040687	0.0964083	0.0418113	6.79573	6.75617	6.8072	6.69951	6.86141	6.76455	0.0797092	0.0586282	0.0854961	0.0648151	0.0650488	0.051197	7.55472	7.52182	7.60587	7.63624	7.53918	7.6262	0.0533124	0.0414102	0.0383472	0.0328039	0.0279619	0.0437055	7.58114	7.59907	7.62196	7.62536	7.5865	7.63246	0.0464028	0.0560534	0.0423594	0.0353274	0.0431161	0.0547172	0.889524
pol_neg_11163	5.86491	5.66335	5.31413	4.84607	4.98315	5.75355	0.0404093	0.0599908	0.0612589	0.11877	0.0604179	0.0409142	5.80631	5.60252	5.12889	4.82066	5.17528	5.77746	0.136711	0.0426253	0.0487504	0.089647	0.0654083	0.0275583	5.3299	5.20665	4.9475	4.50585	4.57916	5.24833	0.0926145	0.0680252	0.0575213	0.135433	0.106217	0.0526058	5.14835	5.29083	4.76387	4.51227	4.7507	5.22397	0.0628113	0.0592259	0.0708881	0.126149	0.0507574	0.029737
pol_neg_11278	3.98117	4.0968	4.01146	4.07802	3.83281	3.85456	0.0453186	0.0514222	0.0621074	0.0471019	0.141906	0.0570173	4.13446	4.06149	4.15775	4.02842	4.18724	3.99921	0.0786726	0.0589335	0.0933097	0.0691135	0.0609934	0.060047	5.05232	5.01538	5.10981	5.10356	5.00214	5.10947	0.0443501	0.037242	0.0391383	0.0448209	0.0204205	0.0315155	5.10204	5.12206	5.11803	5.13272	5.06199	5.09724	0.0375092	0.0450114	0.0385705	0.0281571	0.0297215	0.0543039	1.07115
pol_neg_11504	4.19751	4.19837	4.22803	4.22551	4.11714	4.17289	0.0325497	0.041816	0.0419091	0.0493133	0.0652623	0.0382228	4.21358	4.17262	4.2784	4.22609	4.294	4.11835	0.0501685	0.0506668	0.0726286	0.0519427	0.0379073	0.0549919	3.90344	3.85033	4.01403	3.97775	3.94187	4.05603	0.0585919	0.0335978	0.0346613	0.0456981	0.0461081	0.0378899	4.006	3.97669	4.00459	4.05603	3.99496	3.99544	0.0392732	0.0557761	0.0401979	0.038907	0.0467169	0.0582569
pol_neg_11895	NA	NA	NA	NA	NA	NA	NA	NA	NA	NA	NA	NA	NA	NA	NA	NA	NA	NA	NA	NA	NA	NA	NA	NA	4.37118	4.39736	4.44799	4.45517	4.41726	4.42943	0.0431	0.0449624	0.0425108	0.0455031	0.03648	0.0453816	4.40943	4.42641	4.43765	4.46474	4.43592	4.39933	0.0408295	0.0452219	0.0408401	0.0411842	0.0420802	0.0443469
pol_neg_12009	3.89581	4.03436	4.02656	4.04968	3.9967	3.84271	0.0529426	0.0525007	0.090846	0.0772308	0.10426	0.0929036	4.04212	4.10249	4.11419	3.98509	4.13869	3.92314	0.0879987	0.0716013	0.0646172	0.0648691	0.0587988	0.0503228	4.06523	4.13838	4.13725	4.24392	4.21192	4.08615	0.0502145	0.0649509	0.0649571	0.0385083	0.0477977	0.0484727	4.10249	4.12968	4.29607	4.1556	4.19309	4.09925	0.0640605	0.0823613	0.0510654	0.0479514	0.0625855	0.0624901
pol_neg_12137	5.24989	5.26553	5.21864	5.32208	5.14849	5.26041	0.0514651	0.0408462	0.0332725	0.0299257	0.0676984	0.022422	5.31046	5.31658	5.34867	5.13609	5.32717	5.13271	0.0366244	0.0365067	0.0514695	0.154831	0.0194126	0.0399652	5.40359	5.34064	5.41849	5.43966	5.36953	5.47648	0.032337	0.0244504	0.0283705	0.0258355	0.0384892	0.0270179	5.42659	5.42904	5.45725	5.51482	5.45998	5.4564	0.0364956	0.0331905	0.034677	0.0263164	0.0418783	0.0483855
pol_neg_12304	5.59148	5.39282	5.03253	4.52438	4.68158	5.48769	0.0384423	0.0633391	0.0663032	0.153959	0.073655	0.034423	5.53023	5.33217	4.82982	4.48609	4.88462	5.50951	0.1502	0.0466576	0.0576917	0.119198	0.067987	0.0316198	5.04274	4.92367	4.65723	4.05077	4.19643	4.97263	0.0995819	0.0698686	0.0580683	0.184271	0.133832	0.0615096	4.84625	4.99883	4.45868	4.25994	4.40634	4.91625	0.0755095	0.0653188	0.0782788	0.0671194	0.07253	0.0341914
pol_neg_12521	4.02958	4.31188	4.19379	4.63535	4.55999	4.55683	0.201587	0.231358	0.190749	0.224178	0.240499	0.198245	3.95672	4.14729	4.48665	3.86683	4.4448	4.59387	0.213236	0.137727	0.193199	0.462955	0.152478	0.098301	4.28415	4.24719	4.60494	4.34083	4.4358	4.79532	0.107677	0.0900255	0.123332	0.154384	0.134351	0.130042	4.51371	4.27615	4.50071	4.46463	4.67751	4.7187	0.1172	0.195354	0.141011	0.131746	0.137016	0.144324
pol_neg_12681	5.1569	5.17464	5.16837	5.25399	5.13376	5.14687	0.0439821	0.0420185	0.0577789	0.0251175	0.0711582	0.0461583	5.196	5.16737	5.17244	5.19169	5.25831	5.163	0.0594477	0.0555644	0.0472759	0.0431958	0.0435253	0.0319938	5.22641	5.23703	5.26536	5.35079	5.2566	5.21022	0.0651974	0.0567422	0.0455172	0.0132201	0.0459056	0.0456892	5.25903	5.22801	5.33097	5.30127	5.25062	5.22013	0.0527589	0.0629994	0.0499077	0.0431519	0.0499359	0.043231
pol_neg_13132	4.3381	4.24695	3.75655	3.76175	4.13778	4.16942	0.0680571	0.0954681	0.281501	0.163933	0.123666	0.136942	3.93695	3.90012	4.30635	4.09174	4.24866	4.33257	0.150233	0.155991	0.0842584	0.109882	0.142831	0.0841728	4.01629	3.94029	4.25919	3.82468	3.96159	4.45448	0.248206	0.161714	0.109434	0.331047	0.100827	0.0832039	4.02687	4.12313	4.17055	4.26011	4.23966	4.59794	0.15089	0.124054	0.0943789	0.065594	0.0485852	0.0437627
pol_neg_13157	4.21544	4.22338	4.25814	4.40459	4.21897	4.26286	0.087915	0.0884097	0.0819915	0.0355102	0.0955592	0.0814852	4.22543	4.19924	4.21541	4.25546	4.2774	4.2929	0.080148	0.0798365	0.0947594	0.0783554	0.0766657	0.0926062	4.12605	4.0976	4.18906	4.19448	4.12957	4.19083	0.0813951	0.074742	0.0763495	0.0602261	0.0741642	0.0801884	4.07044	4.08827	4.17043	4.15124	4.15103	4.26193	0.0884481	0.0813401	0.0713384	0.0744309	0.0795271	0.0952607
pol_neg_1324	4.91351	4.98256	4.98807	5.02216	5.18967	5.11832	0.0668747	0.0618768	0.111472	0.0964762	0.0674778	0.069369	5.06644	5.05928	4.77456	5.02422	5.10335	5.40407	0.13214	0.100867	0.161897	0.0696017	0.129271	0.0588312	5.24673	5.4434	5.00676	5.37208	5.43004	5.11642	0.0765148	0.0748757	0.099523	0.0488308	0.0425488	0.0734485	5.18458	5.24191	5.25902	5.02714	5.2295	5.34638	0.0764431	0.0803553	0.08497	0.0773487	0.0689994	0.0817511
pol_neg_13433	5.27954	5.13941	4.89375	4.50731	4.49099	5.26658	0.0748463	0.132821	0.126485	0.137589	0.129801	0.0691338	5.21567	5.08523	4.71904	4.31459	4.80116	5.2514	0.12672	0.125428	0.178985	0.142572	0.104647	0.0987338	4.71199	4.61243	4.46321	4.02084	4.05345	4.7645	0.152536	0.109393	0.134467	0.222738	0.164716	0.124522	4.49615	4.72492	4.223	3.93876	4.15513	4.72151	0.1365	0.135817	0.188366	0.0688726	0.160454	0.1105
pol_neg_13474	4.14816	4.13492	4.09843	4.13009	4.09646	4.19791	0.0529049	0.0459968	0.0410804	0.027133	0.0779813	0.0626055	4.1785	4.18237	4.18774	4.10663	4.28943	4.12897	0.0609291	0.0762579	0.0921329	0.0499756	0.0634627	0.0448793	4.10074	4.03912	4.10772	4.12401	4.06802	4.17859	0.0456866	0.0425522	0.0387636	0.047742	0.0376614	0.0325754	4.16023	4.1188	4.15667	4.117	4.09927	4.08402	0.0322049	0.0473067	0.0363978	0.0450162	0.0205528	0.0743046
pol_neg_13557	4.62168	4.74762	4.57082	4.79525	4.69019	4.7655	0.0648278	0.0724815	0.06274	0.0269868	0.137777	0.078218	4.65509	4.59972	4.89881	4.71784	5.07171	5.098	0.122517	0.0507522	0.035292	0.0969166	0.0483995	0.0269121	4.53646	4.55027	4.67531	4.60413	4.60962	4.74874	0.0330281	0.0362431	0.0321001	0.0806383	0.0640377	0.0331418	4.33931	4.49534	4.6326	4.65908	4.64599	4.83918	0.102548	0.0343291	0.0438351	0.0298705	0.0576635	0.0978028
pol_neg_13669	4.35891	4.27235	4.22172	4.3562	4.27609	4.25223	0.0385137	0.0532289	0.0859771	0.0933788	0.0919579	0.0840381	4.36518	4.21644	4.19686	4.21315	4.28563	4.35512	0.0606659	0.0807947	0.0993592	0.0750373	0.0550008	0.0782134	3.6701	3.31866	3.32089	3.44873	3.51229	3.38231	0.033019	0.118442	0.203181	0.138958	0.120182	0.103746	3.63869	3.6552	3.48531	3.45892	3.38907	3.4853	0.0587666	0.0708641	0.113938	0.0599362	0.0897779	0.143413
pol_neg_1377	5.78144	5.78711	5.84731	5.69483	5.73979	5.82551	0.0364872	0.0314489	0.04381	0.0148467	0.0505767	0.0249448	5.79758	5.8493	5.85339	5.67913	5.81015	5.80178	0.0401841	0.048288	0.0546735	0.0474898	0.0655026	0.0388739	5.73812	5.75187	5.79965	5.68797	5.7343	5.77888	0.0477256	0.0265371	0.0397802	0.0369241	0.0381706	0.0372327	5.76434	5.83539	5.84579	5.69107	5.73583	5.76062	0.0349469	0.0507666	0.0411123	0.0354246	0.0399098	0.0432267
pol_neg_14295	4.23013	4.1878	4.2666	4.33269	4.22036	4.2775	0.0548926	0.0476554	0.051583	0.0183155	0.0712384	0.0584424	4.23356	4.19678	4.29577	4.29524	4.32969	4.24892	0.0451095	0.0548693	0.0652636	0.0597092	0.0569311	0.0452102	3.95805	3.96618	4.0849	4.1752	4.09999	4.19164	0.0927865	0.0796805	0.0587517	0.0404612	0.0556398	0.063947	4.03607	4.06588	4.18586	4.14646	4.11391	4.11594	0.0682139	0.0722188	0.0524088	0.0768074	0.0559057	0.0641334
pol_neg_14663	5.11752	5.16154	5.10588	5.23735	5.034	5.16079	0.057289	0.042986	0.0505262	0.0338656	0.0666027	0.0205778	5.19979	5.2161	5.23457	5.03454	5.22464	5.03062	0.0437851	0.0376858	0.0601728	0.159299	0.0224681	0.0440535	5.28405	5.22983	5.31071	5.34715	5.26122	5.37091	0.0433487	0.0289971	0.0319265	0.0225793	0.0445823	0.03271	5.31516	5.32319	5.35139	5.40357	5.34777	5.34673	0.0463607	0.0401115	0.0451488	0.0364905	0.0527366	0.0546264
pol_neg_14695	4.27637	4.3088	4.23649	3.67814	3.91561	4.33579	0.0306684	0.132893	0.060054	0.196571	0.0608783	0.0692106	4.18424	4.16005	4.46564	3.92984	4.34627	4.21218	0.0644879	0.0522278	0.034541	0.133263	0.0307544	0.0680515	4.19315	4.02459	4.19155	4.09871	3.93355	4.35941	0.0467566	0.0780563	0.0529511	0.168949	0.0844112	0.0775648	4.19203	4.24185	4.25872	4.07496	4.0275	4.2112	0.0447228	0.0341292	0.0358886	0.0773789	0.02416	0.137291
pol_neg_14936	NA	NA	NA	NA	NA	NA	NA	NA	NA	NA	NA	NA	NA	NA	NA	NA	NA	NA	NA	NA	NA	NA	NA	NA	4.16996	3.85341	4.07207	3.62834	3.69905	4.43614	0.146377	0.162709	0.182036	0.186065	0.334998	0.106524	4.37169	4.44251	4.43905	4.23567	4.18709	4.33318	0.171548	0.143445	0.061579	0.11251	0.0570996	0.109437
pol_neg_15057	4.14103	4.27898	4.26346	4.50722	4.17511	4.2187	0.0926491	0.106607	0.113506	0.0529631	0.187453	0.10628	4.29478	4.29095	4.33207	4.37085	4.46093	4.20655	0.110826	0.115689	0.140218	0.0991107	0.0939549	0.0915501	4.23742	4.21805	4.38919	4.35431	4.31578	4.30165	0.139866	0.0928286	0.111469	0.139139	0.103356	0.121288	4.30158	4.13641	4.45509	4.41857	4.36903	4.27747	0.131356	0.149446	0.104869	0.102262	0.112914	0.103214
pol_neg_15315	6.03308	6.00173	6.03971	6.12715	6.0183	6.08217	0.0567097	0.062244	0.0551681	0.0340866	0.0535275	0.057067	6.0097	6.01047	6.00043	6.03514	6.04015	6.0348	0.0618157	0.0564992	0.0713266	0.0575085	0.0568909	0.0609235	6.02527	5.99614	6.07695	6.05495	6.03548	6.08609	0.0605287	0.0475462	0.0550644	0.0625093	0.0509949	0.0589268	6.03359	6.01703	6.09895	6.06172	6.0568	6.07789	0.0672075	0.0616584	0.0577936	0.0542107	0.0529314	0.0551309
pol_neg_15424	4.8559	4.83953	4.78801	4.9372	4.8103	4.80002	0.0507794	0.0370795	0.0819355	0.0366439	0.0719361	0.0216786	4.81346	4.85417	4.93962	4.79729	4.90865	4.84005	0.0515111	0.0545457	0.076573	0.0715183	0.0466912	0.0458435	4.00549	4.03087	3.99929	4.0087	3.95959	4.02932	0.0617434	0.0662149	0.0700256	0.153678	0.0860147	0.054318	3.86148	4.11705	4.07254	4.02176	4.01695	4.08864	0.076467	0.100123	0.09748	0.0501611	0.0778121	0.0528862
pol_neg_1550	5.67251	5.79522	5.73954	5.83028	5.69943	5.7096	0.0181878	0.0273431	0.0348071	0.0323021	0.060233	0.0334571	5.7713	5.77918	5.80818	5.80819	5.83899	5.70431	0.0280295	0.0322893	0.0545736	0.0246966	0.0285955	0.0182609	5.75487	5.74099	5.81361	5.77859	5.75186	5.80113	0.0306904	0.0187646	0.0344122	0.0466393	0.0233795	0.0268546	5.77024	5.74986	5.82769	5.8322	5.8067	5.76203	0.0351667	0.0419751	0.0396194	0.0257995	0.0331788	0.0251169
pol_neg_15563	4.05546	4.10016	4.26328	4.21703	4.09927	4.21497	0.144597	0.109305	0.128068	0.139933	0.159364	0.0942326	4.26017	3.9045	4.27287	4.0863	4.27468	4.05129	0.111761	0.187641	0.196463	0.122687	0.116492	0.103725	4.19175	3.92663	4.27333	4.10933	4.20433	4.15876	0.0883764	0.155177	0.134007	0.150807	0.145681	0.077415	4.24964	4.13227	4.21918	4.08012	4.25722	3.96012	0.134437	0.122106	0.157602	0.127604	0.163512	0.179948
pol_neg_16012	4.59325	4.61152	4.66641	4.58539	4.50861	4.37096	0.0700231	0.0758825	0.119138	0.134723	0.121605	0.130971	4.6023	4.4623	4.75992	4.54263	4.6339	4.39302	0.0807032	0.099518	0.154462	0.0992227	0.0947122	0.133419	4.54034	4.49686	4.65139	4.50546	4.57964	4.38021	0.0568587	0.0771342	0.130675	0.149493	0.11332	0.123747	4.60372	4.45314	4.60557	4.50322	4.58054	4.50316	0.0970368	0.100476	0.176391	0.0810956	0.112299	0.056286
pol_neg_16476	4.11528	4.13765	4.15322	3.81351	4.11881	4.08405	0.213305	0.225043	0.162581	0.173635	0.106373	0.202759	4.24926	4.28838	4.22947	4.05643	4.21867	4.0182	0.19147	0.224302	0.301864	0.153824	0.158208	0.119076	4.37494	4.27473	4.13159	3.8414	4.12566	4.39497	0.162732	0.199125	0.281334	0.248081	0.264196	0.133263	4.45184	4.42147	4.08434	4.29692	4.3036	4.39237	0.156722	0.176194	0.225508	0.172848	0.142398	0.146127
pol_neg_16559	3.63074	3.85765	3.74518	4.08614	4.04454	3.85421	0.107895	0.118479	0.0727211	0.0467163	0.0816268	0.126299	3.79621	3.90721	4.04361	4.07455	4.18988	4.48432	0.2914	0.0598171	0.0550491	0.0870697	0.0723189	0.0652637	3.7199	3.85285	4.07249	3.90797	4.11329	4.27703	0.0958573	0.0903075	0.0550566	0.112778	0.0888686	0.0870797	3.82718	3.95508	4.05138	4.32868	4.34009	4.55693	0.114766	0.0615799	0.0841507	0.0514166	0.077647	0.0544962
pol_neg_1661	3.96471	4.27118	4.48113	4.40406	4.45561	3.96285	0.0722887	0.0771285	0.0967311	0.102615	0.0917837	0.129921	4.1966	4.41906	4.19341	4.42708	4.22131	4.39193	0.0907943	0.0947949	0.155577	0.0429948	0.121555	0.0770637	4.09627	4.44447	4.27157	4.58162	4.38571	3.74035	0.0812892	0.0639217	0.10841	0.0416315	0.0345699	0.126729	4.15186	4.3935	4.55932	4.38461	4.03754	4.13669	0.0964645	0.0744729	0.0651591	0.0880831	0.102661	0.104668
pol_neg_17060	NA	NA	NA	NA	NA	NA	NA	NA	NA	NA	NA	NA	NA	NA	NA	NA	NA	NA	NA	NA	NA	NA	NA	NA	5.16001	5.17043	5.18709	5.209	5.17866	5.21274	0.0541304	0.0536438	0.0754147	0.0875198	0.0586841	0.0407582	5.1278	5.22727	5.2933	5.21347	5.21185	5.25374	0.0716397	0.0888367	0.0689298	0.0546809	0.0505205	0.0670916
pol_neg_17337	4.71718	4.75362	4.58624	4.78706	4.74418	4.63336	0.0561654	0.0698791	0.0986163	0.0665542	0.0737764	0.113454	4.7537	4.60411	4.78478	4.71219	4.66242	4.72797	0.0257297	0.0738062	0.0415473	0.0434118	0.0939247	0.0518746	4.63754	4.66434	4.51382	4.74486	4.65365	4.56184	0.0697923	0.0994046	0.105239	0.054787	0.103518	0.0798643	4.69071	4.41265	4.71161	4.58889	4.65921	4.6567	0.0553231	0.140453	0.0563545	0.173636	0.0672828	0.0520861
pol_neg_17492	NA	NA	NA	NA	NA	NA	NA	NA	NA	NA	NA	NA	NA	NA	NA	NA	NA	NA	NA	NA	NA	NA	NA	NA	4.73489	4.76456	4.7441	4.76789	4.73735	4.746	0.0377677	0.0486496	0.0502923	0.0892478	0.0459014	0.0220288	4.69636	4.8093	4.83136	4.78047	4.76952	4.78906	0.0591642	0.0702261	0.0596977	0.0406571	0.0442455	0.0223454
pol_neg_17618	4.28449	4.28071	4.30423	4.40041	4.22191	4.39865	0.0498138	0.0690908	0.0669418	0.0457694	0.0879279	0.0686076	4.29278	4.20931	4.34366	4.26391	4.39959	4.37293	0.0789173	0.0821518	0.104997	0.0733725	0.0489962	0.0783855	3.92926	3.83835	4.06684	4.01336	3.90834	4.11229	0.0882051	0.101783	0.0822703	0.108666	0.132108	0.0936065	3.89805	4.04987	4.11119	4.06536	4.0182	4.19565	0.092851	0.101659	0.0847504	0.0785112	0.109617	0.0840999
pol_neg_17933	4.90914	4.81312	4.84169	4.98433	4.81549	4.76747	0.0668563	0.0777768	0.0958934	0.0185769	0.105631	0.0748561	4.86609	4.81244	4.91402	4.85671	4.89874	4.8134	0.0758599	0.0903571	0.0940282	0.0868507	0.0656312	0.0732663	4.17954	4.00704	4.16735	4.12104	4.04931	4.09481	0.0878562	0.122658	0.120042	0.156658	0.0996592	0.0860234	4.05261	4.17865	4.28659	4.16028	4.14593	4.21976	0.12857	0.119836	0.113982	0.108834	0.109567	0.0706488
pol_neg_1865	5.72483	5.6357	5.77273	5.71625	5.42929	5.71271	0.105144	0.144161	0.051083	0.0614507	0.17182	0.105101	5.51231	5.63997	5.87569	5.48401	5.71377	5.42769	0.184314	0.137982	0.233737	0.223038	0.132497	0.168508	5.08656	4.96983	5.4274	5.2388	5.03378	5.54967	0.142234	0.167375	0.0979597	0.0682939	0.18718	0.088464	5.23093	5.15862	5.28099	5.25711	5.20216	5.40497	0.155369	0.133393	0.186457	0.152605	0.199615	0.0847591
pol_neg_18829	NA	NA	NA	NA	NA	NA	NA	NA	NA	NA	NA	NA	NA	NA	NA	NA	NA	NA	NA	NA	NA	NA	NA	NA	4.55494	4.46579	4.58846	4.59963	4.52926	4.68732	0.0491514	0.0652496	0.0352726	0.0663111	0.0234287	0.0408137	4.62313	4.68438	4.62219	4.6164	4.64569	4.724	0.0720218	0.0566302	0.0435422	0.0310634	0.0415433	0.0606743
pol_neg_18906	3.04814	3.57744	3.13398	3.63402	NA	2.78239	0.0435658	0.0620725	0.150435	0.0172535	NA	0.133452	3.24341	3.55074	3.49508	3.5156	3.42527	3.17678	0.364234	0.0752513	0.179768	0.124016	0.213023	0.239966	5.6978	5.66578	5.73924	5.74571	5.68714	5.76145	0.0638566	0.043689	0.0454915	0.0459758	0.0418722	0.0472789	5.73066	5.72106	5.77127	5.74654	5.75087	5.78156	0.0577609	0.0581432	0.049818	0.0389287	0.0486884	0.0595863
pol_neg_19087	NA	NA	NA	NA	NA	NA	NA	NA	NA	NA	NA	NA	NA	NA	NA	NA	NA	NA	NA	NA	NA	NA	NA	NA	4.13596	4.08316	4.2944	4.31496	4.15737	4.4043	0.119604	0.0930595	0.0972003	0.0609205	0.058225	0.0918206	4.1684	4.28689	4.31341	4.31122	4.28203	4.36014	0.125118	0.106088	0.104286	0.0835346	0.0920426	0.122027
pol_neg_19470	NA	NA	NA	NA	NA	NA	NA	NA	NA	NA	NA	NA	NA	NA	NA	NA	NA	NA	NA	NA	NA	NA	NA	NA	5.09309	5.04619	5.11216	5.06754	5.03269	5.12105	0.0376093	0.037144	0.0270113	0.0477198	0.0292269	0.0303663	5.14531	5.12839	5.11475	5.12662	5.12572	5.14972	0.0395417	0.0452567	0.0302671	0.0235936	0.0324612	0.0402426
pol_neg_19778	NA	NA	NA	NA	NA	NA	NA	NA	NA	NA	NA	NA	NA	NA	NA	NA	NA	NA	NA	NA	NA	NA	NA	NA	4.39459	4.39323	4.45187	4.47738	4.43634	4.46404	0.0858588	0.0743809	0.0790795	0.0644006	0.0791417	0.0786344	4.36957	4.36358	4.49632	4.43597	4.46589	4.44143	0.0903357	0.081203	0.0964074	0.0773774	0.0781677	0.0825676
pol_neg_19853	4.17577	4.16452	4.23107	4.36498	4.25138	4.24426	0.0906307	0.0751529	0.0819681	0.02066	0.0744489	0.0731195	4.14911	4.15468	4.16347	4.22622	4.23524	4.22213	0.0705165	0.0738398	0.115276	0.0780432	0.0597134	0.0718216	4.16702	4.21939	4.26183	4.28323	4.20585	4.21255	0.0716893	0.071046	0.0825899	0.0899934	0.0683134	0.073893	4.14104	4.20089	4.29146	4.20493	4.23813	4.18428	0.0856369	0.0741782	0.061134	0.0908892	0.0682942	0.0880668
pol_neg_19887	4.11482	4.16669	4.21302	4.30785	4.26547	4.23352	0.104551	0.116662	0.102696	0.0258718	0.0799286	0.0823527	4.06151	4.12278	4.23824	4.21184	4.20897	4.15396	0.108296	0.104717	0.0915322	0.0610403	0.0685426	0.13638	4.123	4.16626	4.25471	4.18748	4.16833	4.13094	0.0745045	0.0862664	0.0800157	0.147725	0.0836633	0.0830294	4.03544	4.09862	4.19897	4.03718	4.17576	4.08073	0.112384	0.0801742	0.0639769	0.0817211	0.0768683	0.104661
pol_neg_20437	4.90061	4.79835	4.54134	4.49731	4.42307	4.24373	0.0852788	0.0682906	0.103124	0.0724559	0.127625	0.0997732	4.69626	4.5482	4.7062	4.51649	4.57151	4.87068	0.14834	0.101237	0.0612038	0.0896425	0.0985101	0.067335	NA	NA	NA	NA	NA	2.28139	NA	NA	NA	NA	NA	0.369211	NA	NA	NA	NA	NA	3.53163	NA	NA	NA	NA	NA	0.227842
pol_neg_20711	4.62556	4.64268	4.45867	4.67795	4.65755	4.67376	0.0727519	0.0681923	0.137356	0.051309	0.0366767	0.0517977	4.58226	4.60201	4.57262	4.58614	4.65584	4.70527	0.0872541	0.0711224	0.0581054	0.0297424	0.0509099	0.0448174	4.66643	4.60839	4.45413	4.49515	4.61943	4.62515	0.0705463	0.0757457	0.152171	0.0234765	0.0368425	0.04572	4.58743	4.62756	4.60229	4.60345	4.63945	4.50815	0.102103	0.0376259	0.0208213	0.0173901	0.05423	0.102055
pol_neg_2119	4.00943	4.10527	4.32503	4.18983	4.2795	3.83358	0.0663022	0.07298	0.119926	0.0814283	0.148007	0.130968	4.0282	4.28549	4.06718	4.26495	4.2965	4.15643	0.106959	0.100426	0.158769	0.103111	0.0752035	0.0637294	4.50216	4.66623	4.51026	4.65385	4.69873	4.46367	0.112763	0.101008	0.101815	0.0698469	0.0621976	0.104085	4.70111	4.61897	4.77436	4.59314	4.56169	4.33815	0.124872	0.0463832	0.0802954	0.175392	0.157562	0.064935
pol_neg_2270	NA	NA	NA	NA	NA	NA	NA	NA	NA	NA	NA	NA	NA	NA	NA	NA	NA	NA	NA	NA	NA	NA	NA	NA	4.3054	4.2447	4.3439	4.32844	4.27588	4.34078	0.0385484	0.0390126	0.024242	0.0242537	0.030517	0.0399649	4.33572	4.33382	4.37548	4.33023	4.3036	4.36052	0.0395775	0.0407463	0.0501801	0.0364008	0.0398449	0.0375822
pol_neg_2280	5.39389	5.51353	5.48193	5.53596	5.55384	5.63392	0.0312299	0.029013	0.0589412	0.0223621	0.0418067	0.0195505	5.32651	5.44761	5.45472	5.44304	5.60435	5.6218	0.0677762	0.0479844	0.061426	0.0479249	0.0309739	0.0373867	5.34529	5.39418	5.34909	5.47631	5.47989	5.62189	0.0288306	0.0353868	0.0376122	0.0288814	0.0334211	0.0342553	5.22491	5.37101	5.379	5.37282	5.5268	5.65447	0.0390201	0.0540325	0.0414052	0.0378427	0.0287097	0.0354865
pol_neg_2576	4.33925	4.22632	4.17861	4.13466	4.24671	4.38813	0.0503614	0.0618789	0.087925	0.0669015	0.111759	0.0409356	4.23437	4.23066	4.15402	4.11546	4.49219	4.49905	0.0893014	0.132277	0.0939346	0.169358	0.0665221	0.0637215	4.82082	4.67633	4.54416	4.64969	4.61937	4.79204	0.150745	0.0914969	0.0778916	0.0737923	0.0633386	0.081064	4.97454	4.71083	4.67473	4.70081	4.77843	4.84707	0.12047	0.0822016	0.0732861	0.134517	0.0917743	0.0844189
pol_neg_259	4.60069	4.71059	4.66996	4.69414	4.60321	4.57734	0.0517643	0.0283623	0.0550039	0.0198827	0.0842205	0.0340988	4.65692	4.64111	4.73138	4.68567	4.72775	4.89349	0.0783138	0.0592254	0.0548209	0.0721173	0.0627223	0.0450435	4.38845	4.34665	4.59134	4.45135	4.40166	4.62908	0.0752767	0.0721106	0.0655948	0.106126	0.108506	0.0758899	4.31723	4.51185	4.55003	4.58323	4.66403	4.86188	0.102661	0.0958739	0.0648875	0.041645	0.079365	0.0712819
pol_neg_2803	5.50445	5.46798	5.50969	5.49006	5.53955	5.571	0.0213806	0.023548	0.0233835	0.0105448	0.0203951	0.0247502	5.46486	5.46982	5.46615	5.50887	5.54317	5.6041	0.0202043	0.030775	0.0170015	0.019682	0.041686	0.0292753	5.5195	5.53242	5.54969	5.5838	5.65234	5.63065	0.017661	0.0108109	0.014901	0.0293117	0.0232023	0.0216014	5.49946	5.53446	5.55448	5.56944	5.61009	5.71895	0.020919	0.0307606	0.0195994	0.0210011	0.0121637	0.0321519
pol_neg_2814	4.10683	3.74926	4.19837	4.39116	4.25673	4.05867	0.179941	0.374343	0.161959	0.0450443	0.110284	0.240554	4.20337	3.90918	3.98602	4.00269	4.1226	4.09548	0.159576	0.265793	0.288728	0.256223	0.210507	0.24272	4.07054	3.90551	4.18258	4.14157	4.14898	4.07331	0.244192	0.297894	0.165572	0.241593	0.205357	0.238454	4.09121	3.9316	4.32367	4.17758	4.17499	4.08139	0.213975	0.245263	0.0626081	0.191355	0.16471	0.220295
pol_neg_3022	3.85401	4.26721	4.45206	4.42522	4.2338	3.94572	0.0602135	0.0702281	0.0731458	0.0493048	0.146779	0.1865	4.01985	4.39724	4.4922	4.23082	4.1412	4.28562	0.102335	0.0775085	0.0609419	0.0926785	0.0585004	0.0721127	3.81404	4.21121	4.38451	4.30101	4.06999	4.04822	0.103947	0.054517	0.0764357	0.0727153	0.0744609	0.0743852	3.98583	4.3449	4.42457	4.27769	4.03762	4.23523	0.0811731	0.0842399	0.0497812	0.0562676	0.0874561	0.0691173
pol_neg_3339	4.33151	4.53112	4.61353	4.99581	4.11023	4.3002	0.129563	0.072176	0.0766557	0.0924401	0.0846718	0.109326	4.59207	4.78723	4.55235	4.41349	4.02622	3.59199	0.10785	0.102802	0.106888	0.0940936	0.047161	0.07592	4.49763	4.65673	4.61111	4.7584	4.41435	4.21356	0.162723	0.060115	0.0798068	0.103741	0.082334	0.0806146	4.81165	4.91732	4.6021	4.76037	4.70078	4.28696	0.0320859	0.0705044	0.199401	0.0940162	0.0620694	0.0895251
pol_neg_3411	3.80229	4.01282	4.13606	4.3233	4.44061	3.89345	0.100832	0.115186	0.138805	0.0569706	0.0507818	0.11002	4.04578	4.09356	3.71818	4.247	3.97711	4.02693	0.14325	0.1212	0.274552	0.0821883	0.254771	0.130873	4.14993	4.45304	4.18104	4.54469	4.54839	3.8083	0.0640943	0.0658375	0.0805409	0.0165028	0.038981	0.122967	4.05129	4.24732	4.3861	4.29013	4.22188	3.91049	0.0666062	0.0866875	0.0568891	0.0467891	0.0519803	0.167175
pol_neg_3416	4.63868	4.66013	4.67598	4.76272	4.64451	4.72269	0.0352333	0.0299056	0.0315862	0.0214051	0.0521648	0.0269637	4.6167	4.64807	4.73561	4.71647	4.75038	4.7298	0.0553324	0.0372042	0.0572408	0.0749149	0.033823	0.0377775	4.5467	4.50676	4.66065	4.67849	4.62075	4.74135	0.0304304	0.0211217	0.0348372	0.0375145	0.0398712	0.0426645	4.54612	4.60424	4.65692	4.69702	4.65245	4.68116	0.0446565	0.0437383	0.0425726	0.0314736	0.0508107	0.0604503
pol_neg_3453	4.181	4.01882	4.04846	4.10254	4.10879	3.97886	0.0917274	0.0951717	0.0724341	0.107387	0.0990499	0.0500778	4.2332	3.98305	3.91671	4.0441	4.0142	4.14017	0.146038	0.0745596	0.0482656	0.0653934	0.101508	0.091182	3.96916	4.05135	4.11447	3.98186	4.13148	4.01024	0.0941266	0.133891	0.0372737	0.0485931	0.124432	0.0784482	3.95104	3.94008	3.98338	4.071	3.98483	4.02047	0.123938	0.0631612	0.0596213	0.100943	0.114041	0.086001
pol_neg_3527	4.51849	4.4655	4.50206	4.38995	4.38268	4.41329	0.0602641	0.0712823	0.0624539	0.0510979	0.071003	0.0507026	4.48732	4.41072	4.55674	4.44077	4.58429	4.56984	0.0520619	0.0373384	0.0521823	0.0659161	0.0512903	0.047258	3.4704	3.33703	3.61938	3.60309	3.37751	3.71877	0.148837	0.121744	0.104278	0.165515	0.104559	0.100094	3.4727	3.68675	3.64165	3.56288	3.57436	3.94055	0.144346	0.068523	0.125658	0.12994	0.121651	0.0829197
pol_neg_364	3.59438	3.78836	4.03934	4.01802	4.32281	3.79867	0.0867584	0.0719659	0.0682177	0.0636068	0.0692878	0.137475	3.64594	3.97019	3.63174	4.14106	3.94298	4.1436	0.173428	0.078486	0.221156	0.0773983	0.126614	0.0806435	3.95746	4.22852	3.90581	4.20247	4.47128	3.97043	0.0366215	0.0590232	0.108939	0.0769605	0.0534599	0.0871421	3.76341	3.95355	4.13645	3.92758	4.10552	4.00002	0.0954386	0.0786343	0.0911072	0.0613814	0.0886484	0.0780194
pol_neg_3643	3.94414	4.03725	4.07101	4.13593	4.04523	4.09106	0.0266923	0.0375317	0.0370504	0.0291901	0.0458004	0.0533069	3.94118	4.04272	4.15109	4.04531	4.13461	4.06296	0.0414123	0.0466778	0.041289	0.0934938	0.0343054	0.0477042	4.33033	4.37631	4.49954	4.4025	4.43206	4.54829	0.0413492	0.0334348	0.0230181	0.0432403	0.0218369	0.0347658	4.4478	4.41681	4.47904	4.50201	4.47546	4.43984	0.0288441	0.037967	0.0193893	0.0313613	0.0241213	0.0428667
pol_neg_3685	4.13542	4.02005	4.16783	4.25343	4.0791	4.2232	0.0698894	0.190064	0.102095	0.135058	0.110158	0.0936793	4.25928	4.27638	4.20064	4.19047	4.40773	4.2934	0.0756767	0.0668385	0.109458	0.0873535	0.103763	0.0521422	3.96489	4.20788	4.0793	4.21033	4.20757	3.99606	0.151399	0.113974	0.0998276	0.0691625	0.0564993	0.0920016	4.13344	4.17544	4.25687	4.16566	3.99979	3.85742	0.0611207	0.131341	0.10999	0.0819751	0.10324	0.116915
pol_neg_3819	3.79618	3.82456	3.9066	3.88129	3.88933	3.75635	0.0698217	0.110963	0.0538857	0.139108	0.11808	0.157409	3.93405	3.91348	3.46284	4.09891	3.99157	3.82521	0.141198	0.0533401	0.363689	0.0955775	0.102793	0.164358	3.98727	4.27695	3.80134	4.50302	4.30798	3.61262	0.0930259	0.134657	0.103211	0.103173	0.0804512	0.139115	3.82308	3.88128	3.89599	3.99984	3.83129	3.5745	0.105566	0.120093	0.0692365	0.119921	0.125967	0.159335
pol_neg_3940	4.26993	4.31957	4.37934	4.44051	4.41605	4.38302	0.0373461	0.0412034	0.0549945	0.0210399	0.0603739	0.0162828	4.28983	4.30979	4.32248	4.39263	4.41497	4.35667	0.05304	0.0503586	0.0590662	0.0395313	0.0602623	0.0665902	4.07813	4.16038	4.17029	4.30306	4.31622	4.22281	0.0653419	0.0446181	0.0441611	0.0610916	0.0561223	0.037488	4.06399	4.09751	4.19613	4.2119	4.23653	4.27817	0.0561009	0.0588716	0.0556474	0.0469456	0.0488611	0.0776629
pol_neg_4271	4.5427	4.57291	4.62446	4.55245	4.50987	4.62659	0.0573359	0.0807616	0.064265	0.0602639	0.103016	0.07535	4.7059	4.78063	4.65317	4.43822	4.63248	4.56386	0.0589596	0.0614346	0.0607786	0.106759	0.0443598	0.0368164	4.61666	4.62031	4.66072	4.60053	4.67272	4.70799	0.0512545	0.0321567	0.0579954	0.0587908	0.0463341	0.0358611	4.67196	4.70617	4.69438	4.62405	4.64204	4.63809	0.0380432	0.048302	0.0401319	0.0357889	0.0604427	0.029777
pol_neg_4309	3.50011	3.6257	3.60159	3.78838	3.58902	3.58695	0.0745243	0.0750153	0.0551135	0.0740329	0.100948	0.088731	3.6869	3.46127	4.32208	3.54227	3.5646	3.62811	0.125278	0.103886	0.241647	0.078209	0.275193	0.105658	4.24865	4.26256	4.20252	4.23414	4.29223	4.19378	0.0467922	0.0582374	0.0470629	0.0748892	0.0547833	0.0347358	4.15391	4.18274	4.24386	4.16789	4.24338	4.23026	0.070078	0.028638	0.068457	0.0460961	0.0365058	0.0609006
pol_neg_4372	4.27001	4.22444	4.33935	4.52058	4.39635	4.41176	0.0521203	0.0557461	0.0653853	0.0667169	0.0334959	0.0487969	4.25378	4.19657	4.04263	4.44355	4.31356	4.44526	0.0820705	0.0733647	0.099416	0.0579303	0.0880084	0.0433799	4.57158	4.62975	4.34152	4.80532	4.6746	4.39946	0.0365675	0.0811968	0.0566359	0.0807092	0.0563717	0.0365297	4.45318	4.40694	4.47458	4.54551	4.41551	4.43892	0.0430528	0.0578718	0.0432288	0.0393827	0.0717169	0.0492101
pol_neg_4425	4.06776	4.03112	4.08962	4.17088	3.98149	4.08638	0.0663868	0.0672191	0.0566947	0.0206605	0.109429	0.0745352	4.09966	4.00193	4.04876	4.1101	4.13084	4.12581	0.0681862	0.0974916	0.0874894	0.0584307	0.084893	0.0595827	4.52108	4.47312	4.61369	4.61351	4.56712	4.70529	0.0731104	0.046807	0.0580007	0.0459848	0.0612833	0.0666205	4.59728	4.57974	4.63386	4.66222	4.62239	4.6788	0.0730352	0.0782575	0.0571461	0.0385519	0.0657756	0.0701643
pol_neg_4760	4.03075	4.05817	4.15937	4.2652	4.12639	4.27967	0.0305746	0.0772447	0.0513557	0.0158166	0.0753667	0.0430378	4.0654	4.09718	4.27928	4.1369	4.28101	4.27584	0.0509272	0.0584522	0.0778062	0.0916628	0.0409058	0.0568175	3.04389	3.36991	3.69768	3.58021	3.68192	3.93496	0.300843	0.0945926	0.0784008	0.195536	0.0793386	0.077723	3.42613	3.5525	3.71951	3.83059	3.7814	3.8939	0.131411	0.134699	0.0890908	0.070022	0.0824463	0.0938588
pol_neg_4985	5.07237	5.03804	5.05956	5.10397	5.03494	5.12346	0.0653053	0.0683402	0.0585193	0.0547536	0.070183	0.0564896	5.09338	5.0343	4.94258	4.98983	5.02338	5.13288	0.0755125	0.0660837	0.0369787	0.0750572	0.050558	0.0663789	5.09264	5.08328	5.11542	5.03607	5.07649	5.16778	0.0735929	0.0522593	0.055776	0.0681846	0.0669177	0.0550182	5.08258	5.11233	5.14081	4.97052	5.10911	5.13012	0.0679636	0.0580964	0.0579648	0.0770297	0.0555592	0.0575352
pol_neg_5080	3.96006	4.03115	4.09448	4.17383	4.12181	4.27033	0.0410515	0.0320305	0.0188359	0.0179493	0.0504432	0.0359109	4.00076	4.03083	4.17984	4.19033	4.24839	4.25457	0.065722	0.0534948	0.0593562	0.0751111	0.038053	0.0442884	3.99296	4.03368	4.24097	4.28242	4.27807	4.49198	0.0670909	0.034177	0.0337957	0.0661705	0.0436512	0.0431424	4.09729	4.13634	4.24591	4.42421	4.39671	4.48865	0.0564931	0.0660169	0.0499719	0.0373834	0.0475407	0.0607772
pol_neg_5136	3.91454	3.96198	3.93449	4.08104	3.97101	NA	0.0264493	0.0547791	0.0345531	0.0501339	0.0828235	NA	3.91635	NA	NA	4.10846	NA	4.01564	0.119543	NA	NA	0.0180809	NA	0.102687	4.58763	4.47607	4.61553	4.66618	4.63495	4.64834	0.0598327	0.181717	0.0579919	0.0506524	0.0920814	0.0544511	4.60677	4.63231	4.70018	4.63315	4.71202	4.70164	0.0708031	0.0500321	0.0708248	0.0591896	0.0437996	0.0689648
pol_neg_5351	4.84013	4.80965	4.88573	4.82113	4.75436	4.96787	0.0768182	0.0747952	0.0519732	0.0798229	0.0452403	0.0548575	4.81303	4.93069	4.97759	4.91358	4.905	4.91919	0.0826077	0.0494962	0.069373	0.0571983	0.0425581	0.0596228	4.76253	4.61091	4.83186	4.64424	4.61862	4.90771	0.0590524	0.0895588	0.0479945	0.0534812	0.077472	0.0448206	4.81527	4.86855	4.88265	4.77091	4.68234	4.79078	0.0567464	0.0716619	0.0381302	0.0410319	0.061413	0.0925097
pol_neg_5886	4.00402	4.15355	4.12172	3.78988	4.03393	4.0067	0.0671945	0.0536888	0.0649331	0.0302108	0.0676065	0.0426759	4.07334	4.21943	4.252	3.76867	4.19786	3.81422	0.0640671	0.0747308	0.0782864	0.0660131	0.0456892	0.0508877	4.11514	4.19162	4.2443	4.0238	4.19474	4.17138	0.0621927	0.0665556	0.0689031	0.0390354	0.0699901	0.0277576	4.22502	4.24807	4.39298	3.96376	4.2403	4.04407	0.0738527	0.0590916	0.0648495	0.0894113	0.0502978	0.0591635
pol_neg_5893	4.53097	4.57806	4.59528	4.67754	4.68829	4.75882	0.0562852	0.0369541	0.030945	0.0664303	0.0583348	0.0229454	4.60742	4.57434	4.76545	4.76001	4.93366	5.31197	0.0786484	0.0356294	0.0378058	0.0570378	0.0470314	0.0483995	5.06566	5.09525	5.25621	5.30845	5.2816	5.50961	0.049445	0.0292599	0.0358898	0.0686869	0.0535323	0.0418871	5.22995	5.31602	5.43994	5.53993	5.58932	5.9082	0.0459146	0.0663934	0.0535566	0.0276544	0.0544839	0.0915765
pol_neg_5915	5.31745	5.03368	5.20144	5.03202	5.09379	5.27145	0.0641852	0.0352533	0.0988138	0.0499056	0.0570162	0.0721917	4.93058	4.97045	5.12112	4.89999	5.06316	5.0718	0.113957	0.0684072	0.112761	0.100196	0.0595651	0.079012	5.07821	4.97527	5.22233	5.01897	5.02549	5.33034	0.0435147	0.0625678	0.0336117	0.0597894	0.060182	0.0502652	5.05943	5.15477	5.1844	5.09733	5.17333	5.34714	0.0666158	0.0607455	0.0589647	0.0661781	0.0765926	0.0870607
pol_neg_6275	4.99071	5.04413	5.01102	4.95492	4.87683	5.0024	0.0170795	0.0894158	0.0564261	0.0303198	0.0524229	0.0317727	4.82478	4.79506	4.96933	4.99377	5.09018	5.00182	0.0622895	0.0526638	0.073901	0.0391437	0.0421533	0.0266616	4.93534	4.90913	4.92409	5.10806	4.85595	5.07917	0.0304141	0.0266597	0.028089	0.097125	0.0500553	0.0611928	4.83153	4.87705	4.91066	4.96044	4.92577	5.03468	0.0634091	0.0363401	0.0243564	0.0299271	0.0498461	0.0548655
pol_neg_6444	6.69369	6.80701	6.77184	6.81591	6.83181	6.92463	0.0313152	0.0298605	0.0566044	0.0193833	0.0433336	0.022907	6.63966	6.74135	6.73783	6.73879	6.87971	6.90669	0.0623167	0.0468064	0.0609284	0.0482685	0.0322307	0.0387656	6.65044	6.70739	6.66453	6.77954	6.78513	6.92101	0.0312215	0.0375364	0.0357759	0.020988	0.0379507	0.0360813	6.55412	6.68715	6.69077	6.68886	6.83141	6.95489	0.0416861	0.0524086	0.0460365	0.041108	0.0341493	0.0394999
pol_neg_6446	4.42557	4.40723	4.40239	4.47108	4.41943	4.47579	0.0333591	0.0470258	0.051146	0.0178092	0.0569165	0.0421832	4.40653	4.37009	4.49235	4.38056	4.50282	4.46379	0.0556282	0.0514222	0.0686643	0.0589048	0.0430393	0.0508825	4.17712	4.12711	4.28218	4.25984	4.21209	4.3121	0.0530206	0.0555875	0.0564259	0.050371	0.0452518	0.0373514	4.21463	4.22855	4.26141	4.30378	4.21295	4.32626	0.051851	0.0600693	0.0593819	0.0353139	0.0635496	0.0621941
pol_neg_6916	3.84236	3.87694	3.9373	4.04529	3.57769	3.75998	0.0767471	0.0594423	0.0661106	0.0108255	0.261506	0.112911	3.99097	3.73096	3.81366	3.7358	3.95707	3.93331	0.089847	0.152029	0.155511	0.154641	0.0806454	0.0598869	6.633	6.58279	6.72182	6.71854	6.65304	6.79861	0.0648563	0.0483425	0.0415548	0.0329042	0.0391685	0.0378217	6.69217	6.72723	6.7168	6.7584	6.70888	6.76485	0.0613705	0.0540448	0.0482941	0.0360897	0.0416981	0.0651994	2.79064
pol_neg_70	4.29818	4.56537	4.27123	4.5606	4.46217	4.52026	0.0876807	0.0533371	0.104775	0.0185785	0.103736	0.066981	4.14983	4.36658	4.45345	4.39044	4.63833	4.62746	0.16574	0.0930149	0.155322	0.105925	0.0682569	0.0601842	4.23193	4.2311	4.35884	4.37793	4.34792	4.67884	0.0857709	0.0935715	0.086741	0.0511874	0.08098	0.0598573	4.11269	4.25616	4.35056	4.3539	4.53634	4.63452	0.116001	0.0881218	0.0828205	0.0944067	0.0766888	0.0683756
pol_neg_7160	3.83381	3.78964	3.87666	3.79276	3.76486	4.08538	0.0550908	0.0661568	0.0396175	0.0839249	0.0905696	0.0407922	3.837	3.85923	3.8749	3.70459	4.04638	3.93054	0.119355	0.109666	0.107664	0.207271	0.0666794	0.071171	4.26226	4.22775	4.27519	4.34563	4.36559	4.61821	0.0933262	0.0556077	0.0484709	0.0572989	0.0613755	0.0681575	4.47911	4.35493	4.32514	4.43671	4.44329	4.40028	0.0581787	0.0512296	0.0276064	0.0900779	0.056986	0.0649993
pol_neg_7182	NA	NA	NA	NA	NA	NA	NA	NA	NA	NA	NA	NA	NA	NA	NA	NA	NA	NA	NA	NA	NA	NA	NA	NA	4.33503	4.3675	4.40552	4.39287	4.37068	4.39689	0.0275599	0.0284223	0.0337239	0.0329417	0.0366226	0.0373999	4.39258	4.35734	4.36812	4.38504	4.35614	4.43177	0.0369122	0.0179668	0.0463882	0.0254227	0.0260159	0.0286007
pol_neg_7235	4.5955	4.69145	4.74492	4.76212	4.73616	4.69657	0.150902	0.0576026	0.0431507	0.086854	0.0371607	0.0360744	4.69758	4.66649	4.73327	4.72147	4.74216	4.76354	0.0888541	0.0453724	0.0452599	0.0571088	0.0208827	0.030341	7.54458	7.51467	7.59979	7.60061	7.55334	7.62772	0.0458095	0.0404649	0.0331942	0.022364	0.0338085	0.0356444	7.58642	7.57997	7.60244	7.60392	7.57253	7.61876	0.0447006	0.0417044	0.040573	0.0304645	0.0351687	0.0377914	2.94909
pol_neg_7298	3.60821	3.86357	3.62066	3.76026	3.69585	3.49873	0.0926635	0.0526258	0.093178	0.0273635	0.0750761	0.0797149	3.82936	3.66642	3.85198	3.69249	3.93161	3.51107	0.110834	0.0548116	0.122421	0.0883123	0.0369021	0.185542	4.76248	4.73193	4.85992	4.81004	4.77678	4.89245	0.0378061	0.0401256	0.0293916	0.0249674	0.0276202	0.0296515	4.84475	4.84997	4.84113	4.88455	4.82413	4.83151	0.0375836	0.0398544	0.0433598	0.0236074	0.0217015	0.0495803	1.15426
pol_neg_7338	NA	NA	NA	NA	NA	NA	NA	NA	NA	NA	NA	NA	NA	NA	NA	NA	NA	NA	NA	NA	NA	NA	NA	NA	4.59222	4.58224	4.65601	4.6694	4.60467	4.69903	0.0676177	0.052083	0.0459194	0.0223237	0.0409708	0.0388352	4.63031	4.65576	4.6528	4.66679	4.62145	4.69317	0.0621197	0.0486236	0.0607641	0.0448306	0.0464164	0.0495766	#VALUE!
pol_neg_7537	4.00279	4.00453	3.97429	3.98032	4.29077	4.22106	0.0642027	0.0545561	0.0830386	0.0917301	0.0679345	0.0949624	3.93684	3.95611	3.82713	3.99767	4.12661	4.23003	0.0887735	0.0472818	0.077997	0.07878	0.0818955	0.0863693	4.267	4.29758	4.14753	4.33136	4.54149	4.28406	0.0444126	0.0320634	0.0252869	0.0846336	0.0352439	0.0588021	4.1723	4.13791	4.13918	4.24799	4.3863	4.33295	0.0474721	0.0477728	0.0176707	0.0465236	0.0660898	0.110346
pol_neg_7652	NA	NA	NA	NA	NA	NA	NA	NA	NA	NA	NA	NA	NA	NA	NA	NA	NA	NA	NA	NA	NA	NA	NA	NA	6.15947	6.11211	6.23588	6.23114	6.16429	6.29242	0.0521362	0.0532262	0.0364534	0.0245251	0.0299699	0.0362113	6.21288	6.24597	6.23458	6.2592	6.22222	6.28962	0.0642312	0.0473344	0.0401865	0.0322155	0.0481061	0.0612994	#VALUE!
pol_neg_7685	5.93982	6.1006	6.05136	6.09649	6.12661	6.25058	0.0377832	0.0368921	0.0686395	0.0244427	0.0532264	0.0253921	5.87159	6.01458	5.99889	6.00206	6.18362	6.22362	0.0773153	0.0557711	0.0742612	0.056973	0.0406158	0.0489381	5.89005	5.97021	5.91567	6.04844	6.08178	6.24694	0.040799	0.0432408	0.0399015	0.0217021	0.0503233	0.046751	5.77365	5.94907	5.94241	5.93787	6.13101	6.28894	0.0532296	0.0614759	0.0616274	0.0530213	0.0474392	0.0525825
pol_neg_7730	4.09411	4.24853	4.08927	4.11199	3.99364	4.04963	0.062062	0.0238813	0.0435313	0.0405611	0.0818002	0.0426632	4.2403	4.14608	4.30717	4.13087	4.29528	4.20621	0.058724	0.0363149	0.045585	0.0565705	0.041982	0.060479	5.42642	5.37115	5.56007	5.42826	5.38568	5.55437	0.0491407	0.0583398	0.0386105	0.0507096	0.0555733	0.0407822	5.53211	5.50369	5.52433	5.50446	5.47311	5.58084	0.0462919	0.0631622	0.0510754	0.0269644	0.0416498	0.0880543	1.3323
pol_neg_7735	4.50074	4.70076	4.68771	4.74621	4.62436	4.64077	0.0271611	0.0444452	0.0571636	0.0197419	0.0925007	0.0458595	4.67095	4.64074	4.86622	4.63986	4.86759	4.70524	0.077648	0.0403217	0.0793983	0.0988415	0.0483113	0.0763829	5.12402	5.09974	5.31866	5.2884	5.27539	5.37768	0.0416628	0.0338974	0.0306767	0.0211673	0.0236415	0.0274978	5.19161	5.23064	5.3295	5.34821	5.30863	5.35933	0.0476772	0.0376026	0.0317179	0.0161174	0.0412061	0.056766	0.623277
pol_neg_7851	4.14314	4.13684	4.1701	4.25252	4.09599	4.17157	0.0662386	0.0625656	0.0509279	0.0494755	0.0860096	0.0552937	4.147	4.12246	4.13531	4.17847	4.19302	4.11949	0.0599008	0.0731095	0.0912322	0.0758123	0.0509235	0.0738388	4.15135	4.10226	4.25696	4.21095	4.16937	4.28084	0.085122	0.0686504	0.0640233	0.0720855	0.0781142	0.0846678	4.22587	4.18882	4.26474	4.26758	4.21943	4.22414	0.0766415	0.0821647	0.0753971	0.0779271	0.0749923	0.0966569
pol_neg_8093	NA	NA	NA	NA	NA	NA	NA	NA	NA	NA	NA	NA	NA	NA	NA	NA	NA	NA	NA	NA	NA	NA	NA	NA	4.44871	4.39694	4.51497	4.53643	4.45586	4.56195	0.0385971	0.0573036	0.0508517	0.0438477	0.0209429	0.0320444	4.44018	4.56055	4.50202	4.54379	4.50527	4.57814	0.0593352	0.0385002	0.0518535	0.0263502	0.0377818	0.0646559	#VALUE!
pol_neg_8157	4.98505	5.14686	5.20498	5.21997	5.13958	5.13507	0.0245252	0.0402852	0.0491932	0.0202383	0.0745553	0.03915	5.13946	5.13192	5.33547	5.17504	5.34488	5.20424	0.0750321	0.0354752	0.0693938	0.0615544	0.0464508	0.063752	5.57342	5.53631	5.7625	5.74063	5.71431	5.82632	0.0396705	0.0279505	0.035591	0.0326401	0.0288378	0.0344444	5.61788	5.65658	5.7751	5.7969	5.78856	5.8229	0.0522449	0.037241	0.0345578	0.0228522	0.0522037	0.0568949	0.588364
pol_neg_8158	4.59209	4.73265	4.62216	4.7111	4.51567	4.56554	0.0451399	0.0406317	0.0565799	0.0190434	0.104931	0.0434543	4.71129	4.61822	4.76598	4.5779	4.78343	4.6319	0.0810183	0.0506148	0.0916973	0.0933731	0.0449381	0.05401	4.95048	4.91158	5.05035	5.0301	4.96489	5.12643	0.0464401	0.0382681	0.0358625	0.0260453	0.0375442	0.0386278	5.01102	5.01962	5.04528	5.07527	5.05145	5.07733	0.0521901	0.0479622	0.0437796	0.0221294	0.0381489	0.0570383	0.358384
pol_neg_8212	3.5678	3.80289	3.90703	3.97095	3.78949	3.8078	0.0585067	0.0912259	0.0710694	0.0369033	0.130128	0.0574741	3.81364	3.79629	4.08467	3.86075	4.08228	3.88436	0.116739	0.0602926	0.0927247	0.0881121	0.0661458	0.0950601	4.38685	4.34394	4.5983	4.56758	4.54095	4.66215	0.0447546	0.0326222	0.0418766	0.0358096	0.0332405	0.0361473	4.43138	4.47831	4.60955	4.62668	4.6166	4.65541	0.0593863	0.0436779	0.0389077	0.0276186	0.0581759	0.0606965
pol_neg_8261	3.71135	3.60592	3.8134	3.55383	3.39055	3.72399	0.0461085	0.0679286	0.0668113	0.0363023	0.0817059	0.0524018	3.55439	3.60788	3.58505	3.5698	3.7046	4.13803	0.0699086	0.0650655	0.0966808	0.0678322	0.0733813	0.0578715	6.39672	6.32688	6.41499	6.37883	6.32583	6.37843	0.0498264	0.0673551	0.0294262	0.0279883	0.0386134	0.0362758	6.47913	6.5017	6.44412	6.43181	6.32694	6.37745	0.0456654	0.0502351	0.0525652	0.0240449	0.0442633	0.0545792	2.68537
pol_neg_8369	4.57295	4.61836	4.64828	4.73815	4.66645	4.6859	0.0991182	0.0614451	0.0601121	0.0224418	0.0362127	0.0525794	4.5967	4.61835	4.62098	4.62679	4.66569	4.65501	0.0874547	0.0667709	0.0539302	0.0841272	0.0382922	0.0571024	4.57859	4.64375	4.62975	4.6069	4.67138	4.64448	0.0831122	0.057441	0.053008	0.0758747	0.0454516	0.040614	4.61091	4.62884	4.67659	4.68384	4.70064	4.64827	0.0670374	0.0687715	0.0491522	0.0562876	0.0541429	0.068386
pol_neg_8406	4.56373	4.62095	4.49626	4.48704	4.52907	4.54943	0.0408154	0.049338	0.0451671	0.0174833	0.061451	0.0472818	4.55413	4.52711	4.61073	4.53206	4.71677	4.48944	0.062834	0.0513096	0.090516	0.0876301	0.0586259	0.036615	4.46999	4.40656	4.46247	4.4724	4.48454	4.60445	0.043753	0.0410604	0.0667971	0.082636	0.0573775	0.0567553	4.52962	4.50514	4.5237	4.40044	4.62333	4.56427	0.0684731	0.0440752	0.0624342	0.0659963	0.0600362	0.0826204
pol_neg_8475	3.41349	3.59741	3.26914	3.53779	3.5537	3.26102	0.0821385	0.0665435	0.185902	0.10166	0.105375	0.101625	3.54365	3.54124	3.66759	3.40422	3.82059	3.72711	0.220988	0.107035	0.129304	0.141281	0.100077	0.105267	4.93206	4.8905	5.02131	5.02564	4.91723	5.06811	0.0501269	0.0476244	0.0429608	0.0600818	0.0221757	0.0409736	4.95378	5.02563	5.02667	5.03538	4.99306	5.06148	0.0563197	0.0505511	0.0539732	0.0368522	0.0392308	0.0528932	1.51857
pol_neg_8490	2.52529	2.52144	2.5341	2.19994	2.68875	2.90115	0.281928	0.105634	0.0645547	0.356362	0.198054	0.108233	2.83871	2.65924	2.81068	2.95251	2.91271	2.63511	0.337508	0.0651548	0.171398	0.0389429	0.194708	0.267505	5.28422	5.28236	5.43321	5.36047	5.31908	5.48556	0.0468799	0.0407134	0.0335551	0.0512227	0.0437504	0.0495097	5.36973	5.39119	5.39513	5.45722	5.42532	5.48891	0.0371752	0.051409	0.0401745	0.0454362	0.043333	0.0606987
pol_neg_8638	6.32054	6.38292	6.41314	6.35081	6.2311	6.33423	0.0189767	0.0512657	0.0617059	0.0330786	0.0598085	0.0276452	6.37934	6.37137	6.37092	6.31583	6.40298	6.39426	0.069324	0.0498042	0.0713174	0.0772625	0.0721161	0.0483191	5.26402	5.1951	5.17044	5.17422	5.08018	5.32835	0.0238427	0.0420653	0.0383423	0.0216902	0.0315208	0.0473114	5.27212	5.23899	5.1557	5.18265	5.19336	5.48022	0.0409653	0.0425953	0.0593871	0.0266624	0.0380633	0.0688381	-1.05652
pol_neg_8712	6.56371	6.64702	6.55114	6.61165	6.50219	6.5425	0.0511494	0.0281958	0.049882	0.024212	0.0830267	0.0437504	6.67698	6.60669	6.66874	6.51249	6.70617	6.64179	0.05271	0.0352361	0.0415848	0.0807494	0.036529	0.0431966	5.84922	5.75885	5.91743	5.55568	5.58857	5.89602	0.0320705	0.0369216	0.01832	0.033062	0.0192538	0.0167462	5.73614	5.73461	5.85389	5.88781	5.79886	5.85104	0.0270174	0.0317128	0.033966	0.042191	0.0316234	0.0658964	-0.714495
pol_neg_8723	5.08818	5.20274	5.13363	5.18341	5.08606	5.15793	0.0281052	0.0430373	0.0351929	0.00896224	0.0768017	0.0400581	5.21557	5.15716	5.26954	5.08974	5.32777	5.24335	0.0604052	0.0299482	0.0598702	0.0978009	0.0290533	0.0570767	5.36134	5.31681	5.47906	5.44566	5.41568	5.6034	0.0303774	0.0329525	0.0204267	0.0298647	0.0300976	0.03001	5.46269	5.4625	5.45387	5.50203	5.49321	5.57993	0.0383787	0.0249396	0.0282741	0.0171904	0.0301019	0.0608009	0.273158
pol_neg_8834	3.10958	NA	NA	NA	NA	NA	0.51231	NA	NA	NA	NA	NA	NA	NA	NA	NA	NA	NA	NA	NA	NA	NA	NA	NA	4.21774	4.186	4.33006	4.32877	4.2778	4.42032	0.140392	0.0864225	0.0830945	0.0728205	0.0859963	0.0911311	4.28385	4.27917	4.36171	4.28766	4.30116	4.37579	0.102692	0.0979672	0.0802591	0.0873198	0.0916509	0.0963138
pol_neg_8846	4.82292	4.81485	4.83902	4.91647	4.85508	4.84737	0.0535131	0.0497347	0.0435738	0.0076612	0.0428161	0.0413506	4.80318	4.82981	4.84124	4.8522	4.85409	4.85812	0.0513001	0.0484589	0.0590671	0.0494774	0.040367	0.0410793	4.71182	4.62751	4.78839	4.67338	4.7126	4.79667	0.0374182	0.0500054	0.032609	0.121088	0.04266	0.0382699	4.73741	4.76017	4.79779	4.75824	4.78572	4.79626	0.043227	0.0449077	0.0532311	0.0461992	0.0436859	0.0462477
pol_neg_8937	3.90009	4.04793	3.81292	3.89634	4.10222	4.45946	0.115102	0.0890725	0.162966	0.0648944	0.135305	0.078093	3.57543	3.82427	4.00807	3.52766	4.50452	4.3051	0.261625	0.160426	0.243318	0.222161	0.0901261	0.10521	3.88429	3.72408	3.88579	3.61675	4.17778	4.63784	0.0759401	0.122107	0.0761495	0.0829997	0.119338	0.077543	3.69904	3.78626	3.98975	3.48339	4.4209	4.65533	0.14319	0.166254	0.0520001	0.209699	0.103515	0.111645
pol_neg_8982	4.69405	4.59947	4.55718	4.66394	4.55594	4.49374	0.0449216	0.0250505	0.0573348	0.0113173	0.0721635	0.0277021	4.66486	4.58486	4.624	4.58289	4.63038	4.61261	0.0315297	0.0535524	0.0534951	0.0341706	0.02824	0.0317833	3.82163	3.70039	3.72506	3.71923	3.63659	3.63063	0.0674071	0.0779961	0.0876734	0.125019	0.0852163	0.0632694	3.55327	3.7346	3.76982	3.71635	3.62779	3.79764	0.104969	0.0764329	0.065927	0.0638409	0.128917	0.0781411
pol_neg_8983	4.40526	4.43644	4.40033	4.33562	4.45989	4.62501	0.0444135	0.0326501	0.0828665	0.0246934	0.0569157	0.0244606	4.13075	4.2653	4.35044	4.27402	4.4994	4.58329	0.105177	0.0576074	0.0925152	0.0768429	0.0487088	0.0582011	4.15087	4.20742	4.23477	4.26155	4.2964	4.59612	0.050069	0.0417557	0.0368753	0.0410318	0.051992	0.0484332	4.0108	4.23306	4.23047	4.18522	4.40558	4.63303	0.0513967	0.0641224	0.0632803	0.0696873	0.0425371	0.0748483
pol_neg_9081	5.24024	5.37855	5.30242	5.35078	5.19145	5.23629	0.0236033	0.0335967	0.0419169	0.0493134	0.0630228	0.0205488	5.37094	5.36197	5.43599	5.25244	5.41087	5.35658	0.0474759	0.0351345	0.0466146	0.0785837	0.0474935	0.0373078	5.41943	5.36506	5.42956	5.37968	5.36914	5.52133	0.0324902	0.0274686	0.0257075	0.0312251	0.0233672	0.0312356	5.47465	5.44793	5.41871	5.43703	5.45934	5.56247	0.0348525	0.0286255	0.0458132	0.0249601	0.0336891	0.0569566	0.179184
pol_neg_9149	7.31014	7.37136	7.30221	7.39036	7.26856	7.30401	0.0493	0.0276303	0.0616133	0.0101774	0.0891839	0.0507259	7.40281	7.33898	7.42092	7.32699	7.4566	7.38275	0.0598067	0.0434762	0.0709511	0.0582921	0.0407169	0.031811	5.28745	5.2304	5.33572	5.29739	5.27268	5.42257	0.0498422	0.0584929	0.032183	0.0663416	0.0470417	0.0552743	5.38353	5.29558	5.33031	5.27279	5.39467	5.48144	0.060018	0.0508219	0.0514469	0.029952	0.0394308	0.0598547	-2.02269
pol_neg_9377	NA	NA	NA	NA	NA	NA	NA	NA	NA	NA	NA	NA	NA	NA	NA	NA	NA	NA	NA	NA	NA	NA	NA	NA	4.3034	4.39887	4.28958	4.41039	4.38883	4.2207	0.052036	0.0546787	0.0828325	0.081361	0.0791164	0.0832335	4.18061	4.2282	4.3479	4.24972	4.33738	4.19373	0.0837277	0.0478297	0.0705078	0.0669706	0.0461258	0.107103
pol_neg_9417	NA	NA	NA	NA	NA	NA	NA	NA	NA	NA	NA	NA	NA	NA	NA	NA	NA	NA	NA	NA	NA	NA	NA	NA	4.4396	4.42315	4.58121	4.37427	4.45072	4.50839	0.0610731	0.0545686	0.0476297	0.0792773	0.0481189	0.0380131	4.63033	4.61711	4.60263	4.6117	4.50179	4.41871	0.0411037	0.0623078	0.0579112	0.0376657	0.0409347	0.0517724	#VALUE!
pol_neg_9500	6.91522	7.00264	6.9091	6.98735	6.84459	6.85145	0.0639531	0.0380251	0.062042	0.0107892	0.09427	0.0467104	6.99755	6.87679	6.95468	6.91098	7.06137	7.08542	0.0764371	0.0459708	0.0696331	0.0572753	0.0474696	0.0284136	6.6787	6.66074	6.73381	6.71006	6.62124	6.72406	0.0402054	0.0376001	0.0448353	0.0374852	0.0489562	0.041568	6.64183	6.64354	6.68305	6.67	6.69164	6.9782	0.062956	0.0389637	0.0501284	0.0427088	0.0436909	0.0707713	-0.236516
pol_neg_9530	4.57514	4.70444	4.63137	4.70975	4.54169	4.63126	0.0313332	0.0431857	0.038001	0.0700165	0.0664175	0.0155901	4.75269	4.72661	4.77112	4.60278	4.75874	4.73549	0.105387	0.0375529	0.0517391	0.0906453	0.0595634	0.0449652	6.03447	5.9952	6.09015	6.06378	6.04595	6.18321	0.0474307	0.0343446	0.0316894	0.0460515	0.0242188	0.0322636	6.10373	6.10487	6.0983	6.10332	6.11821	6.22179	0.0506032	0.0491757	0.0426586	0.022767	0.0421386	0.0505709	1.45933
pol_neg_9587	5.93242	6.02177	5.93458	6.01671	5.89523	5.86728	0.0572029	0.0362328	0.0607932	0.0191304	0.0951203	0.0548702	6.05528	5.94176	6.07202	5.96075	6.13939	6.02272	0.0809664	0.0470974	0.0758496	0.0622918	0.0552096	0.051437	5.39747	5.36255	5.45431	5.43629	5.37696	5.46309	0.0458508	0.0343595	0.031776	0.0160362	0.0268219	0.0384082	5.43293	5.43611	5.46695	5.45777	5.46648	5.49387	0.0412785	0.0388797	0.0415621	0.034608	0.038566	0.050701	-0.534956
pol_neg_9589	NA	NA	NA	NA	NA	NA	NA	NA	NA	NA	NA	NA	NA	NA	NA	NA	NA	NA	NA	NA	NA	NA	NA	NA	4.46787	4.41899	4.51195	4.49017	4.46819	4.57789	0.0419879	0.0220689	0.0283304	0.0416569	0.0288166	0.0247998	4.51545	4.54374	4.54977	4.54374	4.52869	4.59696	0.0474985	0.0353342	0.0314377	0.0153473	0.0352659	0.0566983	#VALUE!
pol_neg_9592	NA	NA	NA	NA	NA	NA	NA	NA	NA	NA	NA	NA	NA	NA	NA	NA	NA	3.20278	NA	NA	NA	NA	NA	0.0365552	4.69977	4.69171	4.90905	4.90266	4.86943	5.03952	0.0628426	0.0687842	0.0335728	0.0331667	0.0356005	0.042533	4.81948	4.8776	4.92454	4.98003	4.95437	5.00447	0.0665712	0.0591307	0.034938	0.0364374	0.0444733	0.0513961	#VALUE!
pol_neg_9618	4.17612	3.60404	3.34845	2.98362	3.46246	4.45058	0.0507167	0.183643	0.0830964	0.0483685	0.158403	0.0722418	4.04394	3.6734	3.16016	2.9464	3.42867	4.30096	0.219632	0.134186	0.193571	0.206385	0.249027	0.0705374	4.28265	4.11014	3.76799	3.34977	3.47183	4.32693	0.0911789	0.0972846	0.0538883	0.225994	0.142138	0.054123	4.29735	4.04994	3.71947	3.34835	3.77055	4.22188	0.060728	0.13457	0.080048	0.0631192	0.0726154	0.0656944
pol_neg_9887	5.51273	5.61957	5.56797	5.64045	5.48726	5.55003	0.0155181	0.0328106	0.0274052	0.059553	0.0516185	0.0172817	5.62154	5.64669	5.6735	5.53546	5.6999	5.6675	0.0486911	0.0396373	0.0461336	0.0729983	0.0555713	0.0398762	7.0605	7.01012	7.08882	7.10613	7.05948	7.15176	0.0518297	0.035302	0.0353983	0.0428246	0.0214903	0.0323843	7.09695	7.11961	7.12221	7.10884	7.12024	7.17373	0.0517544	0.0495071	0.0375384	0.0252609	0.0397751	0.0432466	1.54777
pol_neg_991	4.54235	4.73453	4.91289	4.94792	5.08011	4.75433	0.0597958	0.0402135	0.0567918	0.0541505	0.0556756	0.0829106	4.6872	4.80061	4.57691	5.00156	4.801	4.97005	0.0931124	0.0752442	0.125709	0.0523511	0.10356	0.0568025	4.79307	4.97804	4.78688	5.10823	5.18326	4.79339	0.0578313	0.055034	0.0727726	0.0365598	0.0349961	0.063674	4.74013	4.80997	4.98334	4.90139	4.92152	4.85919	0.0719816	0.0518027	0.0641375	0.0620882	0.062365	0.0594872
pol_neg_9914	5.24419	5.26659	5.29771	5.10121	5.1526	5.18957	0.0341689	0.105628	0.0564389	0.0354357	0.0498299	0.0214351	5.28157	5.13982	5.17364	5.1865	5.32491	5.25462	0.0822604	0.0212492	0.0579964	0.0484521	0.0386772	0.0495095	4.74657	4.72589	4.73713	4.82414	4.69602	4.80431	0.0340834	0.0236328	0.0557549	0.135299	0.0413029	0.0728667	4.81231	4.77735	4.69238	4.67176	4.74738	4.98733	0.0568049	0.022244	0.0370824	0.0211539	0.0369131	0.0521697	-0.497629
pol_neg_9916	4.79478	4.87231	4.83896	4.9886	4.7441	4.73973	0.101091	0.078086	0.105611	0.0276901	0.142773	0.0917713	4.9012	4.76778	4.87599	4.83684	4.96077	4.95207	0.113412	0.0902351	0.123076	0.0840629	0.0786088	0.0715831	4.58195	4.54593	4.67744	4.68382	4.54248	4.59522	0.0925344	0.0945071	0.0805942	0.0694318	0.0822226	0.0925871	4.55082	4.51423	4.643	4.59251	4.62975	4.85927	0.121088	0.0931874	0.0848494	0.0854041	0.0946689	0.0704577	-0.212832
pol_neg_9951	5.09609	5.18809	5.10674	5.17114	5.07702	5.08047	0.0326715	0.0255727	0.0565493	0.044851	0.0813342	0.0320655	5.21023	5.14704	5.23254	5.12645	5.32908	5.26524	0.0781338	0.044942	0.0698696	0.0607844	0.0525186	0.0592426	6.11156	6.0605	6.16975	6.18427	6.07194	6.20525	0.0561965	0.0506512	0.0418791	0.0375988	0.0282893	0.0429677	6.12617	6.18483	6.20607	6.19525	6.15295	6.21823	0.059307	0.0577186	0.051479	0.0383946	0.044979	0.0627923	1.01548
pol_pos_10043	3.89861	3.89046	3.90059	3.97267	3.90625	3.91951	0.055988	0.0642614	0.0409261	0.0610722	0.0652033	0.053387	3.91171	3.89709	4.02855	3.8883	4.07483	3.97636	0.110885	0.066502	0.0720971	0.0710281	0.0471147	0.0440173	4.21682	4.18714	4.35154	4.40123	4.3491	4.45013	0.0798034	0.0901717	0.0825385	0.0648792	0.0832292	0.0865053	4.10168	4.27743	4.35113	4.35589	4.37342	4.34912	0.146641	0.0927971	0.0703567	0.10097	0.0826639	0.123833
pol_pos_10108	3.59519	3.74809	3.6001	3.74297	3.52555	3.55583	0.00232647	0.0441816	0.0601986	0.0901016	0.0491295	0.00828551	3.68466	3.75903	3.8216	3.53096	3.72464	3.73492	0.101969	0.0520323	0.0543221	0.116535	0.0891383	0.0311317	5.17627	5.15446	5.21873	5.21916	5.16018	5.2159	0.0584213	0.0434964	0.0423221	0.0454358	0.0473752	0.0364112	5.22089	5.20358	5.24732	5.22837	5.21558	5.2453	0.0494406	0.056641	0.0386459	0.0347886	0.050813	0.0480115
pol_pos_10118	4.32599	4.4639	4.49018	4.59427	4.54046	4.55008	0.0383489	0.0294402	0.0448914	0.0261764	0.0849869	0.0489032	4.46287	4.4726	4.6687	4.63597	4.8017	4.62787	0.0687023	0.0533761	0.053637	0.0584108	0.0649875	0.0498801	4.5896	4.65099	4.77387	4.81642	4.79494	4.88284	0.0556491	0.021206	0.0403708	0.052951	0.0339692	0.0332331	4.59079	4.70735	4.82775	4.87894	4.90005	4.90248	0.0524398	0.0522638	0.0410186	0.0326417	0.0506336	0.0425277	0.263607
pol_pos_10120	4.3456	4.34737	4.36467	4.38117	4.37584	4.41065	0.0262893	0.0294381	0.019575	0.0337349	0.0386616	0.0161121	4.36955	4.35217	4.43821	4.36484	4.49742	4.44477	0.0560943	0.024414	0.0420399	0.0301513	0.02391	0.0322672	4.20971	4.23614	4.30251	4.33327	4.3357	4.39376	0.0852087	0.047596	0.065958	0.053686	0.0527111	0.0668752	4.2981	4.27699	4.36382	4.33973	4.34708	4.37797	0.0730771	0.0704136	0.0579202	0.0583001	0.0543123	0.0726019
pol_pos_10127	4.40944	4.45656	4.46501	4.57346	4.52376	4.52288	0.081436	0.075664	0.0775213	0.0170743	0.0683228	0.0556	4.4324	4.41329	4.46403	4.53974	4.47508	4.45039	0.0767615	0.0720622	0.0732348	0.0578667	0.0770767	0.093393	4.41001	4.46398	4.49856	4.51891	4.48195	4.4806	0.0752498	0.076866	0.0680261	0.077941	0.0657574	0.0658453	4.39379	4.42925	4.54675	4.48424	4.51293	4.47305	0.0818416	0.0818497	0.0596365	0.0968214	0.0680274	0.0589316
pol_pos_10136	NA	NA	NA	NA	NA	NA	NA	NA	NA	NA	NA	NA	NA	NA	NA	NA	NA	NA	NA	NA	NA	NA	NA	NA	4.55341	4.54173	4.66093	4.65345	4.59965	4.68824	0.061797	0.0545989	0.0454227	0.0425599	0.043598	0.04594	4.55281	4.65903	4.68265	4.65346	4.64921	4.66984	0.0679626	0.0725963	0.060417	0.0499568	0.0509809	0.066972
pol_pos_10224	5.6936	5.40029	5.56649	5.31883	5.33998	5.54371	0.0331589	0.0752987	0.0918416	0.0944961	0.0859807	0.0360005	5.38461	5.21896	5.74563	5.54017	5.8756	5.42385	0.176828	0.0964271	0.101699	0.161125	0.0951496	0.0466673	NA	NA	NA	NA	NA	NA	NA	NA	NA	NA	NA	NA	NA	NA	NA	NA	NA	NA	NA	NA	NA	NA	NA	NA
pol_pos_10267	4.70685	4.3511	4.5536	4.26085	4.28687	4.53795	0.0389398	0.0890108	0.103432	0.114905	0.103446	0.0416882	4.53722	4.13307	4.75767	4.51186	4.9016	4.39324	0.0931607	0.130743	0.111291	0.185278	0.107047	0.0591578	NA	NA	NA	NA	NA	NA	NA	NA	NA	NA	NA	NA	NA	NA	NA	NA	NA	NA	NA	NA	NA	NA	NA	NA
pol_pos_10351	4.54475	4.6629	4.65959	4.57756	4.5757	4.68637	0.063124	0.0698243	0.0852297	0.0178081	0.0773314	0.050977	4.49847	4.65141	4.65354	4.47873	4.64695	4.63583	0.0868972	0.0713384	0.114071	0.0692207	0.0600649	0.0644995	4.45687	4.48513	4.54959	4.49952	4.48679	4.66797	0.065602	0.0661704	0.0628228	0.0227946	0.081896	0.0741987	4.42085	4.57238	4.5907	4.45255	4.54566	4.61111	0.0683159	0.084867	0.0710402	0.076049	0.0732699	0.0683667
pol_pos_10423	4.25796	4.18433	4.07369	4.32849	4.21011	4.19225	0.0692893	0.0812407	0.0500279	0.0792765	0.0776101	0.114531	4.07426	4.18508	4.1135	3.91285	4.18104	3.99212	0.07391	0.0673529	0.153963	0.0832814	0.0699903	0.0881601	4.03009	4.14526	4.30659	4.20883	4.15262	4.17463	0.150168	0.0875561	0.130233	0.048049	0.13133	0.0878478	4.03948	4.19395	4.04263	4.28276	4.33492	4.16717	0.0541055	0.116137	0.10492	0.128263	0.133622	0.0991558
pol_pos_10668	4.47598	4.57952	4.52798	4.59004	4.50499	4.44609	0.0505411	0.0366656	0.041686	0.0638912	0.0662538	0.0171363	4.58906	4.56295	4.61034	4.55998	4.61442	4.51609	0.0475053	0.0379444	0.0399117	0.0425296	0.0389591	0.0440777	4.04682	4.08322	4.07951	4.11701	4.0426	4.04656	0.0462093	0.0529777	0.0408854	0.060493	0.0390134	0.0423936	4.07423	4.09781	4.12802	4.11768	4.10472	4.05551	0.0569335	0.0439414	0.0509769	0.060088	0.0298484	0.0283771
pol_pos_10693	NA	4.12457	4.20743	4.46775	4.43245	4.42312	NA	0.0364608	0.221733	0.125556	0.0562634	0.050074	NA	NA	4.38164	NA	4.52437	4.51792	NA	NA	0.0172115	NA	0.0649434	0.056451	4.41496	4.15766	4.38809	4.38653	4.31665	4.52314	0.0735761	0.124832	0.112201	0.157248	0.0622479	0.0764374	NA	NA	4.48871	NA	NA	NA	NA	NA	0.19313	NA	NA	NA
pol_pos_10814	4.07213	4.12141	4.14485	4.19281	4.06683	4.08482	0.0487745	0.051255	0.0473606	0.0443389	0.0657596	0.0497179	4.18876	4.17322	4.18909	4.05911	4.1898	4.13748	0.0535117	0.0672005	0.0659075	0.090271	0.0659587	0.0656017	4.56455	4.50861	4.59036	4.62847	4.58273	4.58579	0.0936784	0.0996242	0.0967184	0.0916839	0.0843319	0.105893	4.54801	4.49142	4.65487	4.57108	4.57789	4.58709	0.102221	0.0944778	0.0676656	0.0960406	0.0887129	0.0994217
pol_pos_1082	3.73815	4.03903	4.05472	4.22917	4.12776	4.19765	0.0852814	0.0624636	0.0432088	0.03522	0.0742858	0.0558139	3.70053	4.04324	4.23389	4.25091	4.27911	4.37476	0.121912	0.0773211	0.0814259	0.0484999	0.0625225	0.0605702	3.5403	3.79313	4.00101	4.0524	4.09807	4.29941	0.0974615	0.0775354	0.0768006	0.0422085	0.0733967	0.0557918	3.795	4.01001	4.17886	4.29639	4.31601	4.5109	0.0611811	0.0822128	0.0678413	0.0763255	0.0678776	0.0700584
pol_pos_10889	4.9238	4.49958	4.60782	4.25506	4.53779	4.7037	0.0778083	0.107045	0.206751	0.192476	0.124468	0.176151	4.60144	4.24242	4.6124	4.22735	4.11271	4.14192	0.0790131	0.176064	0.172987	0.244975	0.219307	0.239025	4.12954	3.99162	4.46385	3.89134	3.8014	4.60384	0.149425	0.124296	0.066878	0.178839	0.153448	0.0629425	4.19511	4.37297	4.32965	4.16713	4.32056	4.59614	0.136515	0.0665649	0.123929	0.181105	0.131191	0.146528
pol_pos_10947	4.16175	4.18316	4.211	4.23113	4.17044	4.17093	0.0575078	0.0655764	0.0465319	0.0621531	0.0520682	0.0527484	4.24663	4.24826	4.24386	4.15131	4.26026	4.23407	0.0438833	0.0539794	0.0556545	0.0915825	0.05754	0.0562711	4.39585	4.38977	4.43356	4.47453	4.45938	4.43843	0.0875929	0.0773724	0.0812866	0.0766502	0.0855178	0.0890686	4.36966	4.36792	4.47432	4.40947	4.44869	4.43581	0.0910644	0.0750851	0.0859846	0.0804982	0.0830823	0.0884558
pol_pos_11060	5.47291	5.32284	5.10743	4.64055	4.74719	5.50036	0.0452546	0.087757	0.0726172	0.135494	0.0877811	0.0333167	5.47551	5.31918	4.85415	4.52113	4.96856	5.49146	0.141584	0.0733985	0.0817786	0.13195	0.0735668	0.0648986	5.1769	5.03864	4.82226	4.30799	4.45826	5.11637	0.111591	0.0622938	0.0786441	0.1117	0.128066	0.0769223	5.02471	5.12965	4.59376	4.40496	4.59197	5.09845	0.0994658	0.0769578	0.11242	0.0796477	0.0802814	0.0561675
pol_pos_1114	6.25922	6.2774	6.32073	6.40677	6.33274	6.33817	0.0647806	0.0666363	0.0601841	0.00927962	0.0592606	0.0504619	6.25138	6.27851	6.29584	6.32956	6.33855	6.32074	0.0635049	0.0583194	0.072327	0.0464067	0.0649271	0.0597129	6.23707	6.26509	6.31871	6.3319	6.32185	6.31752	0.0676813	0.0536998	0.0620962	0.0622769	0.0586428	0.0597017	6.24436	6.2686	6.33508	6.30656	6.33271	6.3064	0.0663702	0.0586792	0.0574624	0.0580894	0.0564988	0.0529971
pol_pos_11177	5.63883	5.43552	5.72085	5.45001	5.48825	5.6482	0.11157	0.0915626	0.0581774	0.107552	0.0230292	0.0433185	5.2814	5.50937	5.33777	5.58321	5.43017	5.46875	0.0743508	0.0497804	0.0792372	0.0671818	0.0803979	0.0506017	5.22727	5.14445	5.29261	5.15313	5.12398	5.34661	0.0699099	0.0577975	0.0407277	0.0553858	0.0742254	0.0424508	5.17244	5.26618	5.24823	5.22585	5.15512	5.15769	0.0506331	0.0661125	0.0596179	0.066302	0.0586825	0.0662841
pol_pos_11278	4.29254	4.17206	4.12169	4.21809	4.15382	4.04746	0.0645269	0.104133	0.0458374	0.149882	0.0949025	0.13367	4.09088	4.13083	4.06548	3.96753	4.20191	3.96755	0.0738372	0.126481	0.198645	0.0666951	0.0579538	0.119247	4.14037	4.26392	4.32983	4.16491	4.21493	4.25056	0.122295	0.0703006	0.125176	0.119587	0.113309	0.0781179	4.18205	4.25833	4.1284	4.37323	4.50211	4.20127	0.0509715	0.0924093	0.0960114	0.125509	0.0970465	0.0931403
pol_pos_11305	4.03754	4.30045	4.23515	4.25489	4.32479	4.4961	0.0412584	0.0434692	0.0610135	0.0569251	0.0482194	0.0352886	4.03636	4.15845	4.1228	4.17985	4.38674	4.44569	0.0861457	0.0798683	0.0876383	0.0334297	0.0323717	0.0458681	3.95934	4.14418	4.01499	4.23637	4.3149	4.5365	0.0476726	0.0541518	0.0580713	0.0872287	0.0524676	0.0399333	3.98605	4.03712	4.05507	4.07862	4.35087	4.53284	0.0269011	0.0837644	0.0366413	0.0499555	0.0279969	0.0402111
pol_pos_1131	4.37974	4.74207	4.87022	4.8154	4.711	4.45922	0.0333012	0.0507407	0.0550724	0.047486	0.10408	0.116274	4.51738	4.86028	4.92594	4.6947	4.59678	4.71973	0.0797373	0.058003	0.042083	0.0668698	0.0448081	0.0664691	4.35558	4.68008	4.8075	4.71011	4.53915	4.48498	0.0491281	0.0503065	0.0551447	0.0697431	0.0674578	0.0579763	4.46487	4.77921	4.83529	4.71795	4.47781	4.67755	0.0452795	0.0588276	0.0302425	0.0380543	0.0556451	0.0572979
pol_pos_11341	5.22491	5.04059	4.74058	4.0995	4.2454	5.14016	0.0668907	0.0456318	0.0528374	0.0784673	0.0935018	0.0540675	5.18311	5.05382	4.60742	4.09933	4.62005	5.05729	0.140726	0.0462358	0.0512285	0.110801	0.0978092	0.0458775	4.61607	4.43818	4.24934	3.76357	3.89187	4.60064	0.1051	0.125623	0.0893955	0.111239	0.0931712	0.0605851	4.50751	4.64041	3.97857	3.87727	3.89495	4.51241	0.109786	0.0565394	0.0703329	0.140564	0.0836329	0.0798913
pol_pos_11386	3.98992	4.00165	4.13384	4.34642	4.20375	4.22855	0.180635	0.194766	0.149684	0.0322503	0.141611	0.118509	3.98968	4.04815	4.05146	4.16044	4.18142	4.22094	0.190755	0.159483	0.192862	0.119893	0.150617	0.122454	3.99583	4.12004	4.15555	4.23659	4.1829	4.23784	0.190106	0.128222	0.1281	0.124046	0.134226	0.109014	3.96383	4.1437	4.2527	4.16909	4.18537	4.18186	0.198917	0.134938	0.137793	0.11248	0.138181	0.132131
pol_pos_11658	4.7292	4.33947	4.41657	4.43142	4.1939	4.4142	0.12547	0.0842703	0.101909	0.0322845	0.18804	0.149874	4.4824	4.30982	4.54038	4.51783	4.71691	4.66854	0.179307	0.107691	0.169546	0.0641528	0.0768893	0.0996261	4.50952	3.95687	4.30023	4.25574	4.37929	4.40274	0.123622	0.115008	0.171763	0.193165	0.113613	0.12618	4.05995	4.23375	4.18762	4.36233	4.39649	4.44384	0.0730022	0.094886	0.275926	0.0983162	0.137293	0.0795052
pol_pos_11721	4.78098	4.80644	4.83227	5.08596	4.76293	4.7835	0.227785	0.261152	0.230844	0.0799982	0.271776	0.187967	4.83523	4.80736	4.75016	4.58093	4.8249	4.89623	0.183784	0.257658	0.276487	0.319881	0.284998	0.178973	4.87344	4.74854	4.87872	4.79965	4.84913	4.8364	0.184361	0.20987	0.235058	0.291975	0.223371	0.177959	4.7286	4.91032	5.05763	4.71888	4.80455	4.84887	0.26236	0.212332	0.155048	0.239918	0.248325	0.156523
pol_pos_11875	4.45316	4.43125	4.45626	4.41974	4.44163	4.52809	0.0195307	0.0294398	0.0166723	0.0426407	0.043517	0.0184274	4.44271	4.45131	4.51205	4.43995	4.58341	4.49576	0.0210993	0.0211562	0.0323858	0.036616	0.0294631	0.0324386	NA	3.46172	3.58749	NA	3.73116	3.84579	NA	0.0525081	0.0344202	NA	0.0439697	0.0574904	3.5617	3.62801	3.61566	3.67207	3.65516	3.85308	0.0426898	0.0761246	0.101051	0.0519777	0.0561173	0.0461457
pol_pos_11906	4.33286	4.20528	4.11792	4.3774	4.26024	4.20088	0.050131	0.0940974	0.0514123	0.06063	0.0801645	0.129153	4.13447	4.29499	4.09022	4.02591	4.22959	4.02675	0.0812765	0.0612638	0.176386	0.0585068	0.084181	0.107973	4.17278	4.2836	4.38072	4.31493	4.22006	4.22946	0.126787	0.0783914	0.12697	0.0459555	0.111964	0.0842919	4.1987	4.2527	4.17388	4.40902	4.51225	4.23038	0.0512279	0.0925532	0.0920999	0.119192	0.0942289	0.103814
pol_pos_11908	4.06086	3.95913	4.01901	4.07487	4.05798	4.09286	0.09244	0.0853103	0.0552192	0.031019	0.0517012	0.0325717	4.1919	4.32847	4.25598	4.29189	4.25627	4.21168	0.0710802	0.0548338	0.058088	0.0641324	0.0311349	0.0648113	4.08408	3.90218	4.05406	4.04532	4.13526	4.14945	0.0656917	0.062538	0.0345559	0.0704565	0.0733667	0.0683827	4.34502	4.29693	4.37562	4.473	4.29799	4.22228	0.0549686	0.0253879	0.0589755	0.0504583	0.0586831	0.09579
pol_pos_11951	3.82451	3.86619	3.8946	3.9503	4.05145	4.11108	0.135955	0.0656406	0.0502601	0.083304	0.0364428	0.033201	3.89451	3.9159	4.01552	4.12358	4.13929	4.16803	0.129764	0.0380857	0.0527493	0.0467481	0.0677077	0.0302048	4.24426	4.248	4.31299	4.49974	4.43399	4.65759	0.0594472	0.0714327	0.107111	0.0374659	0.105178	0.0923192	4.26256	4.32423	4.43718	4.53289	4.59712	4.81145	0.0933693	0.149567	0.0963019	0.0902301	0.0957134	0.0878522
pol_pos_11988	3.99459	4.01258	4.13903	4.31619	4.17868	4.19864	0.183363	0.170036	0.127721	0.0450144	0.143343	0.116547	4.1275	4.04806	4.06388	4.14955	4.18755	4.21133	0.119752	0.147717	0.149517	0.119133	0.142017	0.129308	3.97397	4.06789	4.15935	4.20931	4.20394	4.18576	0.191546	0.122882	0.119593	0.124717	0.121952	0.115071	3.96259	4.11805	4.23781	4.13529	4.16221	4.15414	0.177235	0.127385	0.1326	0.119692	0.131975	0.129118
pol_pos_1201	3.97422	4.10704	4.24237	4.24205	4.09354	4.09582	0.0996074	0.0893426	0.0745836	0.0587474	0.110826	0.107239	3.97077	4.03211	4.21682	4.12409	4.24868	4.13773	0.126614	0.130599	0.152674	0.107384	0.105072	0.101221	4.09956	4.18456	4.364	4.30872	4.28737	4.47049	0.0956633	0.0772963	0.0759843	0.0806798	0.0848484	0.0900412	4.10717	4.2154	4.39163	4.32193	4.39866	4.49352	0.0964039	0.0944098	0.0873038	0.0727565	0.0803955	0.0696197
pol_pos_12138	NA	NA	NA	NA	4.05802	NA	NA	NA	NA	NA	0.0238205	NA	NA	4.21975	NA	NA	4.22899	4.17347	NA	0.04381	NA	NA	0.0925071	0.00674536	4.53395	4.38772	4.24121	4.30007	4.375	4.38304	0.122464	0.0791025	0.090488	0.102732	0.0540669	0.0836451	4.45871	4.31791	4.2749	4.49356	4.37518	4.37538	0.116585	0.0605903	0.103778	0.0834247	0.105945	0.0746127
pol_pos_12172	5.22449	5.15338	5.18894	5.28375	5.2206	5.18259	0.0447977	0.0490428	0.060764	0.0392785	0.059198	0.0649438	5.24612	5.16856	5.15792	5.2184	5.2098	5.23618	0.0512217	0.0656635	0.0748493	0.0603442	0.0519898	0.0638188	4.79863	4.68964	4.67395	4.77346	4.70459	4.68304	0.0404136	0.0638519	0.0786381	0.0492859	0.064007	0.0681262	4.71744	4.75836	4.79271	4.71283	4.70743	4.74814	0.0557808	0.0612059	0.0376606	0.0848032	0.0664869	0.0699929
pol_pos_12176	3.69927	3.75962	3.88475	3.74013	3.90272	4.22147	0.0753365	0.112977	0.0409589	0.0703746	0.0613541	0.043156	4.03699	3.86104	3.9885	4.04234	4.24089	4.53205	0.0951835	0.0478047	0.0573314	0.0541167	0.0635482	0.0574836	3.63065	3.63306	3.74913	4.20069	4.14005	4.05715	0.0253407	0.0846233	0.0683796	0.13624	0.103057	0.0841105	3.84906	3.99324	3.98574	3.92673	4.06702	4.40307	0.0686399	0.0427489	0.070204	0.0858939	0.0576266	0.128036
pol_pos_12246	4.55417	4.60964	4.35077	4.37281	4.54794	4.47241	0.0904315	0.150547	0.142591	0.0543235	0.0982945	0.159613	4.58069	4.70971	4.54104	4.58249	4.51496	4.63748	0.0659648	0.108414	0.126513	0.0695427	0.160392	0.118775	4.56963	4.61319	4.77615	4.30036	4.5116	4.74833	0.0875063	0.22724	0.0859892	0.0886423	0.112638	0.101528	4.74996	4.8353	4.49864	4.53811	4.81173	4.83224	0.0770979	0.129067	0.135142	0.111117	0.0844989	0.117811
pol_pos_12341	5.16904	5.19205	5.12461	4.5841	4.734	5.23713	0.0223954	0.177678	0.0738921	0.119732	0.0722604	0.088114	5.01474	4.97531	5.39773	4.76867	5.26216	5.09393	0.0951242	0.0652849	0.0617289	0.103956	0.0594512	0.0845093	5.05534	4.8126	5.06326	4.95921	4.8079	5.30442	0.0648634	0.0763251	0.0669056	0.214055	0.0766905	0.0956753	5.0474	5.10165	5.15747	4.90767	4.84986	5.14041	0.0571774	0.070713	0.0568941	0.085974	0.0389628	0.143229
pol_pos_12381	4.18826	4.52311	4.47826	4.24262	4.2475	4.53572	0.0510867	0.0874013	0.0866103	0.118608	0.122518	0.117126	4.58555	4.74428	4.4949	4.36391	4.47631	4.29679	0.0957843	0.0945753	0.112562	0.106398	0.0667807	0.0883965	4.50676	4.51569	4.47149	4.4252	4.53904	4.60128	0.0913261	0.054503	0.0486414	0.0947692	0.0581909	0.0651821	4.55565	4.67695	4.63118	4.4614	4.40186	4.41642	0.0745674	0.0630147	0.0733658	0.0454081	0.0463396	0.0603256
pol_pos_1239	4.53113	4.51888	4.55045	4.52874	4.44204	4.47951	0.0914643	0.0473522	0.0575673	0.032289	0.109018	0.0494773	4.51901	4.43791	4.53973	4.54062	4.58571	4.56484	0.119324	0.0606877	0.0979501	0.0998924	0.0731877	0.0557597	4.17477	4.09803	4.28989	4.24993	4.19457	4.43866	0.100395	0.0608087	0.0758169	0.100123	0.0804782	0.0643613	4.30028	4.31227	4.36372	4.326	4.35349	4.55928	0.0823921	0.107847	0.068391	0.0367691	0.0858778	0.0876247
pol_pos_12439	4.14766	4.24057	4.25375	4.41886	4.28686	4.39447	0.103001	0.0973294	0.108475	0.10081	0.104249	0.0759512	4.23792	4.2656	4.16789	4.31665	4.28162	4.38756	0.120575	0.0847548	0.116869	0.0769592	0.113901	0.0774155	3.95156	3.9798	3.97253	4.01144	3.92076	4.12132	0.087388	0.106776	0.124849	0.0795508	0.123073	0.037745	3.87503	4.07655	4.09241	3.99772	3.95807	4.10715	0.121008	0.105274	0.088224	0.0792102	0.0968689	0.0628239
pol_pos_12446	4.92608	4.87624	5.1329	5.04115	5.15555	5.40781	0.0596897	0.0751962	0.0308611	0.036618	0.0464556	0.0351988	5.08872	5.05776	5.22382	5.22476	5.43257	5.67481	0.101407	0.0522115	0.0331197	0.0528416	0.0585747	0.0486002	4.84518	4.96322	5.01079	5.40309	5.36324	5.25641	0.050178	0.0437529	0.0592163	0.110779	0.0812275	0.0655003	5.0393	5.18153	5.16882	5.20127	5.29703	5.57255	0.0654871	0.0515745	0.0639926	0.0573896	0.0445496	0.106163
pol_pos_12470	4.49418	4.13832	4.21646	4.20368	4.14895	4.16168	0.0814944	0.035267	0.0491798	0.0578456	0.0672542	0.0741287	4.55094	4.3585	4.61131	4.38587	4.51672	4.27797	0.0896605	0.0841185	0.0950123	0.0348958	0.058169	0.0492192	4.44156	4.37561	4.15064	4.2786	4.22677	4.13319	0.0638612	0.0527171	0.0698888	0.0859789	0.086488	0.0384375	4.53246	4.54639	4.5411	4.46542	4.3276	4.42108	0.0814719	0.0539804	0.0787807	0.0313932	0.0856498	0.0765467
pol_pos_12481	4.66798	4.786	4.54121	4.87868	4.76172	4.59964	0.12531	0.060753	0.053448	0.0499445	0.077858	0.122934	4.79776	4.90464	4.65851	4.88602	4.46572	4.29331	0.0349783	0.051623	0.0994489	0.096929	0.114777	0.0805171	4.75624	4.38497	4.97657	4.46396	4.55275	5.00226	0.0958801	0.100348	0.0417404	0.0834549	0.130913	0.0490194	4.81433	4.96619	4.4917	4.66823	4.90021	5.045	0.0819079	0.0367279	0.0728578	0.109423	0.070595	0.100549
pol_pos_12531	4.23503	4.06181	3.95744	4.28366	4.18695	4.13724	0.0736316	0.122225	0.0846754	0.0852353	0.0736086	0.12764	3.98783	4.19653	4.05774	3.87819	4.11937	3.87024	0.0754214	0.0627209	0.165518	0.108137	0.0801297	0.110295	4.04841	4.13517	4.27956	4.19574	4.07606	4.20208	0.150049	0.0930117	0.143681	0.053473	0.135833	0.0767916	4.06945	4.15754	4.05021	4.32949	4.43443	4.11057	0.0607177	0.10596	0.0970198	0.124909	0.100135	0.0988027
pol_pos_12544	4.7994	4.76653	4.76034	5.06217	4.98507	4.88036	0.217767	0.171548	0.139966	0.0841986	0.163687	0.202382	5.01578	4.87187	4.85377	4.9918	4.83716	4.90636	0.179926	0.212605	0.266897	0.203769	0.222486	0.178082	4.98652	4.24005	4.97269	4.95476	4.84803	5.04896	0.174945	0.0843895	0.259036	0.0818758	0.20313	0.211769	4.73759	4.7813	4.45711	4.93476	5.12982	5.16252	0.288503	0.223402	0.238271	0.165055	0.219422	0.208247
pol_pos_12556	4.53003	4.45664	4.44172	4.61811	4.70861	4.61924	0.148594	0.122815	0.0503849	0.0874351	0.0558244	0.13804	4.78694	4.5984	4.70196	4.7659	4.70219	4.57053	0.0412143	0.156524	0.0620177	0.0290315	0.129628	0.159158	4.75369	NA	4.9866	4.49889	4.6053	4.77025	0.00482955	NA	0.0337976	0.0929981	0.102135	0.155382	4.90541	4.47454	4.37812	4.66877	4.82776	4.70277	0.0411307	0.20817	0.135359	0.0837188	0.208563	0.228366
pol_pos_12591	4.52726	4.56496	4.56922	4.69668	4.58765	4.59741	0.0649716	0.062687	0.0918021	0.0657122	0.0761191	0.0838734	4.5789	4.5581	4.59904	4.53948	4.64714	4.61204	0.0976766	0.0772562	0.105139	0.0872688	0.0744151	0.0875825	4.18129	4.08092	4.07435	4.07258	4.07591	4.12613	0.0335044	0.072768	0.0860153	0.0999862	0.0869148	0.0679848	4.07259	4.10995	4.16967	4.07516	4.11147	4.09413	0.0658276	0.103096	0.07065	0.0811265	0.0705273	0.0912968
pol_pos_12597	4.55253	4.25579	4.53965	4.20548	4.24696	4.2843	0.12075	0.0591604	0.070489	0.0520952	0.106137	0.0382425	4.279	4.15669	4.0668	4.30379	4.04461	4.43383	0.0712779	0.0844587	0.118844	0.0752088	0.0504051	0.0715171	NA	3.5575	NA	NA	NA	NA	NA	0.0882023	NA	NA	NA	NA	NA	NA	NA	NA	NA	3.79139	NA	NA	NA	NA	NA	0.101261
pol_pos_1262	6.30081	6.2349	6.18659	6.42012	6.32964	6.29338	0.0728614	0.0565757	0.103892	0.0577801	0.0523275	0.0699812	6.23733	6.1685	6.29625	6.29839	6.34856	6.25442	0.0785909	0.11049	0.0883891	0.0827685	0.0663655	0.0731545	6.23387	6.13735	6.26371	6.39949	6.30999	6.21471	0.040554	0.044556	0.0454458	0.0791738	0.0817916	0.0585732	6.15456	6.23314	6.23557	6.3712	6.32998	6.28706	0.0730911	0.0652501	0.0616393	0.0539634	0.0843129	0.0551519
pol_pos_12623	4.36014	4.27883	4.14306	4.25709	4.26258	4.06018	0.0745254	0.102762	0.0615613	0.121621	0.0733723	0.127339	4.27906	4.22629	4.09733	4.03831	4.2576	4.00902	0.072469	0.11688	0.188537	0.0684407	0.0472925	0.101399	4.32388	4.49047	4.37127	4.39415	4.33011	4.28273	0.114472	0.067581	0.145262	0.044353	0.103978	0.0741619	4.31363	4.42032	4.24394	4.47525	4.53569	4.29787	0.0318112	0.0964263	0.088021	0.123362	0.119982	0.0947416
pol_pos_12633	4.3194	4.1294	4.21798	4.2152	4.15233	4.19708	0.0648779	0.0532705	0.0517636	0.0312921	0.0501909	0.0626181	4.28838	4.28736	4.0918	4.33082	4.27947	4.29621	0.105272	0.0939665	0.133009	0.0563699	0.0922117	0.0811245	4.2434	4.02784	4.19441	4.14569	4.06958	4.28034	0.0845647	0.0881994	0.0799724	0.0569496	0.0915183	0.0812069	4.3339	4.37858	4.40736	4.4152	4.31278	4.41852	0.0929243	0.109421	0.0888262	0.0905857	0.108126	0.10049
pol_pos_12847	NA	NA	NA	NA	NA	NA	NA	NA	NA	NA	NA	NA	NA	NA	NA	NA	NA	NA	NA	NA	NA	NA	NA	NA	4.29868	4.30639	4.35023	4.41871	4.36674	4.4342	0.11533	0.0877872	0.113123	0.0870121	0.104221	0.0858021	4.31656	4.30986	4.35489	4.38557	4.34209	4.34697	0.122834	0.0854258	0.123987	0.0898434	0.110249	0.0955733
pol_pos_12932	5.32173	5.24152	5.23202	5.33788	5.06424	5.23209	0.0521026	0.0688538	0.0661675	0.0364514	0.108256	0.079278	5.29284	5.34045	5.36355	5.07393	5.38707	5.11575	0.0670582	0.0707506	0.091324	0.217095	0.0464854	0.0777268	5.35909	5.30234	5.46523	5.3359	5.38076	5.45003	0.0515944	0.04254	0.0492955	0.0693309	0.0582156	0.0355243	5.38299	5.4203	5.48406	5.50073	5.5048	5.46782	0.0583953	0.0629698	0.0579961	0.0433527	0.0598972	0.0654934
pol_pos_13013	NA	NA	NA	NA	NA	NA	NA	NA	NA	NA	NA	NA	NA	NA	NA	NA	NA	4.14833	NA	NA	NA	NA	NA	0.0601766	NA	NA	NA	4.14403	4.14486	4.39768	NA	NA	NA	0.0884233	0.0767098	0.0746867	NA	4.31749	4.28174	4.44241	4.55386	4.96232	NA	0.0694197	0.0829058	0.0319514	0.0587169	0.105621
pol_pos_1305	5.36738	5.37481	5.34787	5.33544	5.37088	5.4863	0.0341352	0.0558735	0.0226359	0.0460105	0.0412231	0.0364887	5.39001	5.41038	5.32847	5.40254	5.44505	5.60176	0.0562818	0.0433598	0.0429565	0.027674	0.0467487	0.0233553	5.52203	5.58816	5.42239	5.58511	5.57782	5.63316	0.0370566	0.0236316	0.0460385	0.0849043	0.0247199	0.0465989	5.56344	5.5008	5.5178	5.43338	5.56686	5.72044	0.0313093	0.0251634	0.049773	0.0245705	0.0362711	0.0303593
pol_pos_13074	5.38047	5.36116	5.31693	5.32329	5.26094	5.20521	0.0290608	0.0322895	0.0476729	0.0796919	0.0407406	0.0328819	5.32895	5.39133	5.4358	5.20099	5.29288	5.13726	0.0631399	0.0279872	0.0665382	0.0920945	0.0358431	0.0606914	4.68571	4.65158	4.70096	4.43534	4.59281	4.44237	0.0814117	0.0889523	0.0710017	0.127259	0.0863479	0.0864844	4.50406	4.69531	4.70594	4.71218	4.57035	4.50424	0.097086	0.0656145	0.0594098	0.0374754	0.0775142	0.0709023
pol_pos_13208	NA	NA	NA	NA	NA	NA	NA	NA	NA	NA	NA	NA	NA	NA	NA	NA	NA	NA	NA	NA	NA	NA	NA	NA	4.69321	4.73365	4.75592	4.75228	4.7463	4.7174	0.0340312	0.0371797	0.0274273	0.0525003	0.0345325	0.0332261	4.71292	4.71993	4.74061	4.75391	4.73968	4.62999	0.0348973	0.0317532	0.0302455	0.0335875	0.0322566	0.048054
pol_pos_1346	5.90182	5.93737	5.96901	5.8559	5.84601	5.86048	0.035217	0.0412181	0.0390212	0.00857058	0.0384012	0.0285093	5.94309	5.96109	5.99497	5.83252	5.88823	5.87954	0.037156	0.0358369	0.0457898	0.0361547	0.0430704	0.0404045	5.86242	5.87519	5.95063	5.82547	5.82736	5.8302	0.0420341	0.0278516	0.0334013	0.0299906	0.0415909	0.0395266	5.90481	5.94234	5.97646	5.83776	5.82235	5.81606	0.0325534	0.0405931	0.0375946	0.0340478	0.0399104	0.0385158
pol_pos_1355	4.30511	4.30976	4.24504	4.20245	4.06527	4.27475	0.0907175	0.0486813	0.0933988	0.0232323	0.133731	0.0600906	4.20161	4.16065	4.22437	4.01658	4.28305	4.46502	0.116243	0.0911904	0.129556	0.155987	0.100508	0.0696801	3.68511	3.77263	3.77855	3.50017	3.58812	4.0342	0.135054	0.0106993	0.0519898	0.0755983	0.0901739	0.0994912	3.81112	3.87802	3.79816	3.71842	3.90119	4.19176	0.137693	0.0301089	0.0342338	0.0538607	0.034534	0.105473
pol_pos_13709	4.03993	3.95502	3.93601	3.9086	3.92751	4.07469	0.0477395	0.0881043	0.0576504	0.0762935	0.0630385	0.0419027	4.09973	3.88665	3.992	3.87271	4.118	4.10449	0.0395309	0.0674268	0.0699198	0.0277787	0.0385381	0.0537442	4.55246	4.42916	4.49285	4.453	4.45788	4.68351	0.0519941	0.0306709	0.0348286	0.0588313	0.0526185	0.0465138	4.55789	4.57728	4.52814	4.46316	4.52204	4.58024	0.0317281	0.0323164	0.0276214	0.0482142	0.0373956	0.0694837
pol_pos_13720	4.28873	4.07698	4.40151	4.50426	4.2873	4.39545	0.0670163	0.201417	0.0608431	0.0647117	0.167403	0.0272688	4.51167	4.00263	4.4713	4.24487	4.34733	4.29606	0.0242577	0.205869	0.0263976	0.16566	0.0414889	0.176035	4.37546	3.86362	4.40375	4.24387	4.14316	4.22512	0.0234138	0.284647	0.0414806	0.143392	0.230729	0.143133	4.29808	3.95248	4.40035	4.09809	4.35795	4.12699	0.225467	0.163394	0.0602053	0.213748	0.0347094	0.212172
pol_pos_13897	NA	NA	NA	NA	NA	NA	NA	NA	NA	NA	NA	NA	NA	NA	NA	NA	NA	NA	NA	NA	NA	NA	NA	NA	5.28457	5.3201	5.31314	5.30972	5.31364	5.32854	0.0365635	0.049079	0.0469748	0.0944591	0.0411202	0.0229185	5.23486	5.38327	5.40741	5.3499	5.35493	5.36182	0.0563234	0.0745238	0.056842	0.0397251	0.0389254	0.0469582
pol_pos_14034	4.24545	3.96444	4.418	4.34422	4.26592	4.35741	0.0543501	0.0648557	0.0291953	0.0497259	0.0648057	0.0273046	4.21438	4.16403	4.33296	4.38095	4.37481	4.33616	0.0694181	0.0622578	0.048106	0.0252347	0.0265434	0.0448219	4.28107	4.1245	4.32359	4.28845	4.26331	4.35083	0.101336	0.0372876	0.0488969	0.102742	0.0779225	0.0476589	4.28749	4.20251	4.29325	4.19893	4.33585	4.35504	0.0604266	0.0712844	0.0401931	0.0226322	0.0240034	0.0514453
pol_pos_14104	4.18952	4.1903	4.31099	4.4282	4.28555	4.26415	0.121943	0.113762	0.111225	0.0724242	0.104098	0.105573	4.25899	4.2057	4.22785	4.26905	4.31614	4.31604	0.118606	0.108107	0.126593	0.105491	0.100971	0.11033	4.11241	4.10493	4.20129	4.21344	4.2082	4.19626	0.113767	0.107933	0.0970826	0.099243	0.110597	0.0989312	4.08701	4.12582	4.27594	4.15989	4.18036	4.19427	0.140692	0.107975	0.0956167	0.110846	0.105906	0.118016
pol_pos_14130	5.08448	4.54691	5.04723	4.66034	4.83987	5.00941	0.165381	0.125182	0.139348	0.189304	0.105469	0.0607225	4.57509	4.77316	4.62204	4.91675	4.58117	4.82767	0.153242	0.0981713	0.147636	0.122609	0.0987084	0.130273	4.18649	4.11037	4.55292	NA	4.1569	4.40321	0.0325022	0.179466	0.112971	NA	0.1047	0.116914	4.34398	4.36778	4.22537	4.48655	4.3858	4.1696	0.131587	0.11974	0.10506	0.0871115	0.0933593	0.162124
pol_pos_14132	NA	NA	NA	NA	NA	NA	NA	NA	NA	NA	NA	NA	NA	NA	NA	NA	NA	NA	NA	NA	NA	NA	NA	NA	4.63483	4.63961	4.65009	4.66903	4.6677	4.67193	0.0560459	0.0596575	0.0587696	0.0604296	0.0524653	0.0474891	4.60064	4.66242	4.74002	4.66019	4.68312	4.68042	0.0638061	0.0726621	0.0511318	0.0538243	0.0461887	0.062091
pol_pos_14170	4.07493	3.7825	4.23146	3.95873	4.0113	4.0597	0.11257	0.0911327	0.10213	0.078167	0.0616419	0.0755697	4.12184	3.85935	3.97321	4.07084	3.97434	3.98749	0.0777284	0.101837	0.0734361	0.0436923	0.0902762	0.0992952	4.15683	4.05517	4.15668	4.24143	4.21775	3.93122	0.0391643	0.133731	0.0724685	0.0593766	0.120833	0.0956013	4.06794	3.99021	4.23806	4.22472	3.93848	4.00893	0.105912	0.0924211	0.100923	0.141952	0.073936	0.130813
pol_pos_14246	4.2737	4.31835	4.4865	4.35467	4.29041	4.29621	0.217166	0.138343	0.109066	0.126221	0.107719	0.134439	4.23757	4.23409	4.27224	4.40176	4.32699	4.26225	0.126139	0.160909	0.153599	0.100559	0.130001	0.114286	4.2936	4.29515	4.41236	4.44818	4.34549	4.33877	0.137827	0.143564	0.0918098	0.092013	0.108581	0.116514	4.24496	4.31015	4.41644	4.31933	4.31771	4.31423	0.100328	0.10679	0.115056	0.178833	0.154129	0.117449
pol_pos_14294	5.1317	5.23033	5.14801	5.233	5.10571	5.10298	0.0679094	0.0442036	0.0662102	0.0146694	0.103497	0.0612371	5.25798	5.16421	5.27082	5.15919	5.34439	5.23606	0.0796438	0.0553303	0.084118	0.0687323	0.0628004	0.0447999	NA	NA	NA	NA	NA	NA	NA	NA	NA	NA	NA	NA	NA	NA	NA	NA	NA	NA	NA	NA	NA	NA	NA	NA
pol_pos_14296	NA	NA	NA	NA	NA	NA	NA	NA	NA	NA	NA	NA	NA	NA	NA	NA	NA	NA	NA	NA	NA	NA	NA	NA	4.3416	4.34995	4.38755	4.39025	4.39138	4.39981	0.0889037	0.0901617	0.0926398	0.0822614	0.0746297	0.0741257	4.29135	4.37563	4.49212	4.38225	4.42008	4.39785	0.0988142	0.104648	0.069392	0.0889942	0.0727072	0.0966536
pol_pos_14297	5.02036	4.90274	4.85405	4.67946	4.94161	5.09878	0.0478777	0.0818681	0.0891562	0.107281	0.0964851	0.0529817	4.91336	4.89398	4.84674	4.91405	5.19687	5.16384	0.0777979	0.12964	0.0908925	0.0658214	0.0593659	0.0580046	5.47334	5.37665	5.25034	5.30781	5.32075	5.46386	0.119508	0.0725126	0.0698091	0.0760967	0.0740953	0.0726566	5.56337	5.39679	5.38743	5.38109	5.46747	5.45131	0.08653	0.0635951	0.0630517	0.104462	0.0816788	0.0777963
pol_pos_14323	4.3735	4.48312	4.3972	4.50406	4.34752	4.34028	0.0782881	0.0474786	0.083415	0.0214539	0.118186	0.0694746	4.51948	4.41213	4.5447	4.40529	4.58816	4.49861	0.0870927	0.0598685	0.0881684	0.071862	0.0668186	0.0442413	NA	NA	NA	NA	NA	NA	NA	NA	NA	NA	NA	NA	NA	NA	NA	NA	NA	NA	NA	NA	NA	NA	NA	NA
pol_pos_144	3.91163	4.14026	4.06196	4.15847	4.19706	4.34773	0.0497058	0.0543129	0.114793	0.0450469	0.0868622	0.0426312	4.04316	4.05845	4.00634	4.10871	4.29458	4.31136	0.0267944	0.0708528	0.120219	0.0465856	0.0517797	0.0742218	3.8441	3.94731	3.85934	4.0661	4.12718	4.3839	0.0590057	0.072734	0.0545545	0.0535619	0.0803417	0.0604365	3.68558	4.06398	3.91238	3.96658	4.2016	4.40687	0.0604102	0.0535961	0.0713575	0.060402	0.0512811	0.0645466
pol_pos_14719	4.45848	4.49645	4.51522	4.62621	4.54974	4.51952	0.0527712	0.0784203	0.0602532	0.0140441	0.058708	0.0567209	4.43073	4.43958	4.47212	4.54205	4.50904	4.48624	0.0748643	0.0692853	0.0695628	0.0459624	0.0866305	0.0717288	4.45728	4.47523	4.53577	4.53827	4.4971	4.42691	0.0656722	0.0463914	0.0636895	0.0789677	0.0555841	0.0678914	4.43668	4.45018	4.56356	4.41674	4.49359	4.45952	0.0809262	0.0706019	0.0438621	0.0702268	0.0693652	0.0592049
pol_pos_14816	4.67148	4.73578	4.55325	4.54255	4.63773	4.41606	0.100852	0.0479877	0.0952375	0.121139	0.0650053	0.106488	4.31589	4.5799	4.41359	4.62809	4.65238	4.66715	0.198359	0.120154	0.220114	0.11113	0.0888581	0.0724357	4.49629	4.66428	4.62382	4.75835	4.70146	4.59373	0.141581	0.0457164	0.0910843	0.0564321	0.0934243	0.110328	4.60366	4.67902	4.59066	4.61103	4.67489	4.63362	0.0922679	0.083253	0.138934	0.13301	0.0883988	0.0700826
pol_pos_14912	NA	NA	NA	NA	NA	NA	NA	NA	NA	NA	NA	NA	NA	NA	NA	NA	NA	NA	NA	NA	NA	NA	NA	NA	5.25252	5.2178	5.28707	5.27127	5.21571	5.28675	0.0538623	0.0412159	0.0320405	0.0446491	0.0402981	0.0337645	5.30601	5.28528	5.30843	5.29073	5.28691	5.31172	0.045899	0.0534393	0.0303203	0.0293335	0.0452581	0.050673
pol_pos_14922	NA	NA	NA	NA	NA	NA	NA	NA	NA	NA	NA	NA	NA	NA	NA	NA	NA	NA	NA	NA	NA	NA	NA	NA	4.55822	4.53102	4.59975	4.56528	4.51951	4.59078	0.0576684	0.0439497	0.0342006	0.0500703	0.0471097	0.0379227	4.6083	4.58596	4.61653	4.60219	4.59204	4.62492	0.0478756	0.0589089	0.0378845	0.0299475	0.0486961	0.0591979
pol_pos_14997	NA	NA	NA	4.15727	4.12262	4.2814	NA	NA	NA	0.00671675	0.0534152	0.0512506	NA	3.93537	4.24386	4.1282	4.48535	4.21738	NA	0.0068567	0.06394	0.0611211	0.0354812	0.0512461	NA	NA	4.05546	4.15846	4.29237	4.41769	NA	NA	0.0732505	0.0877131	0.0785563	0.0617868	3.94538	3.93241	4.17387	4.34981	4.4432	4.44195	0.021504	0.0817074	0.0492855	0.0309325	0.0650097	0.0553078
pol_pos_15049	NA	NA	NA	NA	NA	NA	NA	NA	NA	NA	NA	NA	NA	NA	NA	NA	NA	NA	NA	NA	NA	NA	NA	NA	4.25159	4.21409	4.28421	4.30347	4.25635	4.28917	0.0801226	0.0662522	0.0664498	0.056552	0.0692098	0.0666571	4.26273	4.23261	4.33436	4.29225	4.29745	4.31213	0.0758892	0.0744175	0.0613247	0.054863	0.0711556	0.0706601
pol_pos_15070	NA	NA	NA	NA	NA	NA	NA	NA	NA	NA	NA	NA	NA	NA	NA	NA	NA	NA	NA	NA	NA	NA	NA	NA	5.06833	5.06127	5.12465	5.11074	5.14987	5.20569	0.0329585	0.0312584	0.0364044	0.0425843	0.0211954	0.0302671	5.07972	5.14657	5.18993	5.16252	5.19109	5.20114	0.0566031	0.0451042	0.0268749	0.0396705	0.0369419	0.0404036
pol_pos_1508	4.23146	4.25909	4.33262	4.37906	4.46821	4.17984	0.0680183	0.0694669	0.0559254	0.0424215	0.105174	0.0517377	4.2307	4.35417	4.40127	4.39786	4.36795	4.27109	0.0921726	0.0595658	0.0271209	0.0320422	0.0254549	0.0588076	4.26649	4.2722	4.45419	4.36848	4.40607	4.39055	0.0898815	0.0564928	0.0993051	0.0505573	0.0396657	0.0618784	4.42266	4.39545	4.50114	4.47842	4.45665	4.46015	0.0620656	0.105145	0.0602543	0.0670662	0.0631665	0.105454
pol_pos_15090	4.29808	4.43384	4.38432	4.46595	4.43587	4.15366	0.0438376	0.0977038	0.0656596	0.0534464	0.0842825	0.0064112	4.55595	4.47225	4.51457	4.424	4.58692	4.37156	0.123842	0.0344563	0.0841386	0.123819	0.0798107	0.11179	5.53133	5.52017	5.59206	5.61944	5.53258	5.60672	0.0605185	0.0480546	0.0345285	0.0339348	0.0334007	0.0378744	5.55989	5.59524	5.609	5.62723	5.59133	5.59738	0.0524968	0.0616228	0.040737	0.0384268	0.0456795	0.0489422
pol_pos_15115	4.35479	4.34529	4.37266	4.52513	4.39388	4.38237	0.070075	0.0811915	0.0921356	0.0436386	0.0830542	0.084422	4.3486	4.3688	4.38489	4.33249	4.4282	4.39134	0.106703	0.0772872	0.0997866	0.0836162	0.0816798	0.104472	NA	NA	NA	NA	NA	NA	NA	NA	NA	NA	NA	NA	NA	NA	NA	NA	NA	NA	NA	NA	NA	NA	NA	NA
pol_pos_15198	NA	NA	NA	NA	NA	NA	NA	NA	NA	NA	NA	NA	NA	NA	NA	NA	NA	NA	NA	NA	NA	NA	NA	NA	4.333	4.28404	4.37543	4.35521	4.33946	4.42583	0.0412309	0.0384112	0.0187349	0.0399293	0.0291563	0.026053	4.38283	4.43377	4.39667	4.36748	4.41918	4.45047	0.0332381	0.037412	0.0200795	0.0290496	0.0245961	0.0465626
pol_pos_15289	3.84624	3.80388	3.83608	4.14018	4.0048	4.33432	0.23381	0.222136	0.275386	0.125267	0.246121	0.0850715	3.62295	3.9961	3.47286	4.25989	4.37286	4.3	0.209384	0.152312	0.378088	0.077987	0.131254	0.0688675	3.65847	4.13428	3.95995	4.26	4.08424	4.46038	0.272919	0.263799	0.248619	0.173269	0.297043	0.0757569	3.90698	4.14177	4.05416	4.21257	3.8344	4.31703	0.196993	0.135016	0.202018	0.0491457	0.166259	0.0969524
pol_pos_15356	NA	NA	NA	NA	NA	NA	NA	NA	NA	NA	NA	NA	NA	NA	NA	NA	NA	NA	NA	NA	NA	NA	NA	NA	4.85425	4.81868	4.89753	4.88023	4.81762	4.88486	0.056583	0.0382719	0.0324895	0.0464892	0.0452142	0.0352577	4.90983	4.89001	4.91901	4.89066	4.89918	4.92699	0.044557	0.0540823	0.0365724	0.0290275	0.0476327	0.0530827
pol_pos_15376	NA	NA	NA	NA	NA	NA	NA	NA	NA	NA	NA	NA	NA	NA	NA	NA	NA	NA	NA	NA	NA	NA	NA	NA	4.33912	4.30804	4.43854	4.51386	4.32224	4.46895	0.0336582	0.0955293	0.0269085	0.0471613	0.0321686	0.0395131	4.38634	4.47645	4.43565	4.46784	4.4024	4.44467	0.0278023	0.0535406	0.0507619	0.0371585	0.036732	0.0716495
pol_pos_15520	NA	NA	NA	NA	NA	NA	NA	NA	NA	NA	NA	NA	NA	NA	NA	NA	NA	NA	NA	NA	NA	NA	NA	NA	4.46854	4.4441	4.50647	4.53248	4.46786	4.51182	0.0772731	0.0559658	0.0600875	0.0515522	0.060992	0.0644075	4.48648	4.46084	4.55088	4.51028	4.52352	4.52989	0.0692668	0.0627113	0.0539729	0.0603887	0.0655917	0.0703412
pol_pos_15547	4.27163	3.98992	4.10887	4.20317	3.96377	4.41114	0.0452382	0.116941	0.132998	0.0976793	0.204723	0.0736036	3.97819	3.97066	4.03807	4.09475	4.29938	4.28214	0.176279	0.163418	0.121496	0.108799	0.148742	0.104499	4.23229	3.73505	4.14217	4.2711	3.79676	4.40069	0.145657	0.249545	0.153228	0.115865	0.242277	0.0822369	4.09889	4.14561	4.33455	3.85494	4.2047	3.97777	0.178481	0.172916	0.128111	0.179345	0.0904909	0.293255
pol_pos_15551	4.05538	3.78651	4.10866	4.12954	4.12078	4.37627	0.200948	0.183876	0.127027	0.117209	0.117774	0.0736201	4.05694	3.95017	4.02717	4.08963	4.2713	4.24815	0.0902157	0.152802	0.111371	0.105501	0.130608	0.102016	4.06326	3.52042	4.11934	4.24632	3.89865	4.38058	0.24669	0.207943	0.157538	0.110393	0.154811	0.074412	4.09386	4.0726	4.28013	3.81305	4.18363	4.24417	0.165893	0.205169	0.120942	0.171251	0.0862239	0.101509
pol_pos_15586	4.23014	4.17267	4.30609	4.26066	4.29486	4.26645	0.103794	0.045922	0.053476	0.0286914	0.0886846	0.144598	4.11163	4.06978	4.23092	4.05946	4.36609	4.19821	0.0825403	0.212878	0.0682408	0.257865	0.0694354	0.116937	4.229	4.35626	4.34044	4.40581	4.45286	4.39223	0.122359	0.0753488	0.0619973	0.0909642	0.0980736	0.0919415	4.47207	4.32397	4.36997	4.34174	4.29506	4.308	0.0575446	0.0907575	0.0740763	0.0825228	0.0635061	0.124385
pol_pos_15588	4.01266	3.99545	4.12247	4.08382	4.07843	4.04382	0.113366	0.0486213	0.0666065	0.0315068	0.106381	0.183647	3.90748	4.0945	4.0594	4.15403	4.1796	3.98884	0.107202	0.0468489	0.0645814	0.0599869	0.063583	0.139121	4.07202	4.19001	4.18298	4.21408	4.2749	4.21411	0.10939	0.0743231	0.0758105	0.0913756	0.101667	0.108948	4.2926	4.13205	4.2002	4.15195	4.08626	4.10111	0.0768158	0.0971232	0.0746329	0.0911444	0.0739834	0.141268
pol_pos_15615	NA	4.24207	4.24625	NA	NA	NA	NA	0.0471046	0.0645526	NA	NA	NA	4.54666	4.13777	4.25755	4.35507	4.39825	4.32109	0.0673341	0.0560524	0.0928427	0.0104348	0.0623871	0.134961	5.2002	5.18647	5.27041	5.30306	5.21856	5.28608	0.069408	0.0498731	0.0382489	0.0326952	0.0380048	0.0407423	5.23122	5.27054	5.29054	5.30619	5.27604	5.27932	0.0589185	0.0667714	0.0467227	0.0428886	0.0519255	0.054238
pol_pos_15930	4.42501	4.53968	4.57898	4.71747	4.56794	4.65691	0.113013	0.0940096	0.107411	0.0838152	0.11466	0.0807998	4.54382	4.54371	4.47677	4.64461	4.62724	4.63119	0.120066	0.0916944	0.127262	0.0821715	0.107925	0.0833043	4.59406	4.58961	4.62591	4.66724	4.63736	4.7038	0.118703	0.0839578	0.109625	0.0964936	0.107362	0.0875006	4.57489	4.52318	4.65193	4.66005	4.63959	4.68935	0.124411	0.0952035	0.128568	0.0836991	0.107205	0.0840569
pol_pos_15933	4.37817	4.14933	4.39319	4.41741	4.37918	4.42532	0.0416764	0.0953749	0.0364671	0.0416749	0.0693709	0.0517269	4.30465	4.31824	4.43504	4.09662	4.48578	4.42421	0.0421991	0.0501608	0.0499436	0.254286	0.0534916	0.0443439	4.41856	4.2136	4.24882	4.30922	4.42265	4.52648	0.0439948	0.0827314	0.235637	0.0644528	0.0856809	0.0354767	4.46845	4.14728	4.15231	4.06309	4.38871	4.29723	0.0363601	0.269128	0.175319	0.123931	0.0320957	0.0786629
pol_pos_16029	4.16395	3.94889	4.06355	4.23189	4.25147	4.09182	0.0954792	0.150827	0.0968896	0.0468526	0.0951326	0.13006	4.01017	3.92547	3.66636	4.081	3.88604	4.11015	0.0655199	0.135389	0.227815	0.207947	0.226702	0.180532	4.22516	4.16434	3.91587	4.01688	3.97277	4.304	0.0495681	0.214191	0.201094	0.233173	0.32191	0.11609	4.23749	4.14363	4.14779	3.93853	3.7912	4.08392	0.0930991	0.0923189	0.154034	0.254461	0.264931	0.208125
pol_pos_16081	4.75019	4.75265	4.79006	4.86378	4.76605	4.76905	0.0587359	0.0691206	0.0501896	0.0603108	0.0523803	0.0581337	4.73965	4.74343	4.74315	4.79473	4.75799	4.737	0.0584672	0.0604591	0.0652328	0.0541577	0.0508346	0.0608953	4.80955	4.81292	4.84217	4.90112	4.84767	4.83449	0.0594688	0.0540139	0.0526539	0.0607004	0.0495851	0.0553649	4.78036	4.78977	4.86674	4.84488	4.83685	4.82688	0.0539031	0.0589321	0.0517028	0.0588837	0.0485881	0.0559213
pol_pos_16116	5.12424	4.95117	5.1721	5.02567	5.12615	5.17427	0.0737708	0.0749113	0.0700965	0.208414	0.0663693	0.0494571	5.0729	5.03582	5.18565	4.89926	5.25873	5.14659	0.0600533	0.0723506	0.0592681	0.25106	0.0550539	0.0645441	5.12022	4.91278	5.0873	5.04573	5.12047	5.19939	0.0742443	0.0525024	0.0736068	0.111963	0.0734912	0.0474297	5.14683	5.03925	5.14336	4.93391	5.06237	5.07337	0.059249	0.0749813	0.0513967	0.0705787	0.0262772	0.0702387
pol_pos_16117	5.22285	5.05794	5.2783	5.12343	5.22721	5.28839	0.073019	0.076918	0.0675431	0.213345	0.0664535	0.0491623	5.17139	5.14193	5.29119	5.01536	5.35473	5.25324	0.0631683	0.0717156	0.062204	0.237452	0.056373	0.0639246	5.22611	5.02479	5.19882	5.14861	5.22589	5.31132	0.0739246	0.0470656	0.0769534	0.114886	0.0727622	0.04816	5.25443	5.14314	5.25164	5.04021	5.1757	5.18128	0.0559777	0.071016	0.0532408	0.0728899	0.0257977	0.069858
pol_pos_16202	4.36633	4.05433	4.47147	4.0791	4.17288	4.51015	0.0451082	0.0544619	0.0943847	0.073644	0.0847038	0.0402523	4.08278	4.17769	4.17936	4.19364	4.47253	4.24405	0.080259	0.0541587	0.057307	0.0724202	0.0526468	0.086879	4.14635	3.99575	4.10874	4.17394	4.33805	4.41629	0.0931144	0.0796012	0.0948101	0.116558	0.0770448	0.072911	4.17147	4.21184	4.36916	3.89163	4.08666	4.01882	0.0885862	0.106619	0.188371	0.059673	0.106407	0.152471
pol_pos_16204	4.47793	4.19157	4.58651	3.88967	4.33063	4.63489	0.0525662	0.061546	0.0981029	0.296104	0.0692139	0.0459956	4.26428	4.31246	4.2982	4.30761	4.58599	4.39399	0.0685202	0.0438092	0.0727419	0.0785809	0.0508469	0.0815959	4.25972	4.11069	4.24267	4.30674	4.44734	4.54674	0.0940874	0.0676343	0.0829178	0.108622	0.0675199	0.066198	4.30126	4.20896	4.50226	4.02455	4.14694	4.06538	0.0921316	0.168361	0.169566	0.0513533	0.125028	0.16605
pol_pos_16519	4.77341	4.5061	4.85192	4.87695	4.80711	4.90561	0.0977658	0.112894	0.0813407	0.0574944	0.0667952	0.0662651	4.73078	4.55955	4.85808	4.72162	4.92564	4.83263	0.0912498	0.109998	0.0653538	0.12737	0.0599623	0.0859324	4.65649	4.21725	4.59685	4.41082	4.62021	4.9039	0.193975	0.188693	0.217281	0.290275	0.204873	0.0781525	4.65999	4.61	4.56681	4.34915	4.80345	4.63161	0.127284	0.125001	0.321933	0.144329	0.0340121	0.122448
pol_pos_1669	NA	4.28491	4.49886	4.39314	4.23132	4.33898	NA	0.0414627	0.0729847	0.10216	0.0571725	0.0265533	4.18285	4.422	4.37637	4.2393	4.16605	4.27521	0.0620458	0.0606969	0.0581915	0.0660224	0.0740706	0.0160722	4.07814	4.1806	4.25878	4.25598	4.14411	4.05469	0.0774362	0.0330019	0.0327385	0.05656	0.0571768	0.0872555	4.01054	4.31575	4.36307	4.34474	4.04688	4.21543	0.059992	0.0625412	0.0662314	0.0544422	0.0262411	0.0491723
pol_pos_16885	4.33084	4.03272	4.36198	4.37617	4.348	4.3739	0.0527492	0.127741	0.0181777	0.0312212	0.0432658	0.0598591	4.30819	4.21631	4.37092	4.25366	3.94524	4.35719	0.0102805	0.0935617	0.0261958	0.113545	0.484758	0.0335178	4.54032	4.19848	4.42438	4.38391	4.19288	4.13153	0.0479985	0.0876806	0.0693022	0.140789	0.305655	0.269833	4.17536	4.11349	4.39391	4.22821	4.23595	3.762	0.249999	0.219954	0.0251366	0.102332	0.207409	0.416035
pol_pos_1748	4.34631	4.33619	4.40852	4.50059	4.39816	4.41236	0.0762514	0.0705201	0.0748638	0.00668638	0.0686797	0.0600174	4.36229	4.37694	4.32597	4.42116	4.41938	4.44628	0.0599324	0.0633735	0.0875289	0.0610917	0.065751	0.0630078	4.29917	4.36076	4.39265	4.41117	4.42754	4.44578	0.0857569	0.0479027	0.0576966	0.0544263	0.0557394	0.0662104	4.34451	4.38251	4.43548	4.44898	4.44911	4.44947	0.070593	0.0665939	0.0770504	0.0577766	0.0578307	0.0654157
pol_pos_1833	NA	NA	NA	NA	NA	NA	NA	NA	NA	NA	NA	NA	NA	4.24061	NA	NA	NA	NA	NA	0.083216	NA	NA	NA	NA	4.41389	4.58205	4.43588	4.39261	4.44644	4.50998	0.116458	0.0696778	0.0942923	0.0879919	0.0714876	0.051238	4.60025	4.42069	4.553	4.59954	4.59983	4.36498	0.0934518	0.0566504	0.101593	0.157604	0.121756	0.0273422
pol_pos_1835	4.89044	4.879	4.93107	5.00057	4.93018	4.93662	0.0514152	0.0558004	0.0561637	0.0359192	0.0556176	0.0654699	4.90462	4.88154	4.86339	4.92321	4.93226	4.93409	0.0616252	0.056558	0.0639222	0.0542877	0.0565011	0.0665599	4.90838	4.8732	4.92486	4.9528	4.94072	4.93796	0.059919	0.0553164	0.0525926	0.0533423	0.0604663	0.0639301	4.90215	4.92912	4.96403	4.91194	4.92424	4.93123	0.0551051	0.0833243	0.0464194	0.0598222	0.0568207	0.0651061
pol_pos_1892	4.4594	4.51014	4.01146	4.38724	4.26903	4.39707	0.149194	0.134885	0.409838	0.112767	0.179356	0.108917	4.22635	4.38141	4.48681	4.3016	4.34376	4.28572	0.186671	0.104008	0.226184	0.109383	0.0844817	0.146241	3.77024	3.84054	4.01572	3.8929	3.78213	3.57127	0.148213	0.199488	0.166779	0.134567	0.402724	0.222087	3.6159	3.8814	3.76139	3.94345	3.73639	3.80416	0.186597	0.193182	0.388061	0.0614361	0.174098	0.102796
pol_pos_2006	3.35201	3.91815	4.29361	4.1299	4.22875	3.77097	0.126256	0.062165	0.09534	0.0463424	0.0348936	0.299558	3.82912	3.88485	4.21553	4.11882	4.13378	4.66181	0.164206	0.136818	0.0844227	0.122198	0.105548	0.0944552	3.79541	3.86266	4.22886	4.16623	4.12007	4.14475	0.0982985	0.0797761	0.0941057	0.115941	0.114022	0.100024	3.96738	4.05042	4.33026	4.19923	4.28292	4.82032	0.0909018	0.161802	0.0638891	0.0692591	0.100791	0.110758
pol_pos_2008	4.00001	4.21364	4.27112	4.28042	4.15934	4.1665	0.0406938	0.0517196	0.0590235	0.0361139	0.118211	0.0429997	4.19278	4.15692	4.42075	4.24575	4.44464	4.25905	0.104142	0.046652	0.0773938	0.0737924	0.0556519	0.0812251	4.71049	4.66878	4.89522	4.87294	4.86413	4.97704	0.0354312	0.035899	0.0249118	0.026793	0.0275783	0.0291195	4.75716	4.79769	4.91488	4.95698	4.92252	4.95149	0.0494733	0.0407518	0.0258982	0.0203511	0.0491484	0.0501036
pol_pos_2043	4.52122	4.55227	4.5608	4.64897	4.58162	4.6051	0.0232345	0.0378349	0.0346433	0.031203	0.0566443	0.0289898	4.51967	4.5392	4.64964	4.59594	4.73008	4.62439	0.045105	0.0396016	0.051442	0.0359067	0.0462644	0.0440017	4.20724	4.23336	4.40636	4.38019	4.38166	4.45279	0.0429518	0.0289274	0.0375632	0.0687251	0.0474532	0.0343727	4.25273	4.35796	4.39034	4.43196	4.45406	4.48666	0.0524155	0.0452933	0.0407249	0.0359935	0.0502428	0.0605534
pol_pos_2070	4.86566	4.87605	4.88945	4.92312	4.89724	4.99751	0.0220376	0.0307587	0.0172877	0.01899	0.0450151	0.0208239	4.86948	4.85439	4.8892	4.94815	5.02075	4.9063	0.0585941	0.038864	0.0477711	0.0378539	0.0230607	0.0311685	5.23761	5.23354	5.35389	5.35109	5.33687	5.46427	0.0342249	0.0262268	0.0250082	0.0127138	0.0388487	0.0308448	5.30463	5.28712	5.3094	5.36543	5.39812	5.37424	0.0329515	0.0326216	0.0267043	0.0314874	0.0324336	0.0417596
pol_pos_2125	4.79613	4.81432	4.83882	4.84461	4.79425	4.90709	0.0142856	0.0110999	0.0144717	0.0207145	0.0366157	0.0103851	4.76001	4.79263	4.90577	4.84794	4.95334	4.86035	0.0404115	0.0235454	0.043793	0.0418526	0.0203917	0.0245768	4.67562	4.69177	4.87022	4.81904	4.80165	4.97592	0.0276426	0.0315361	0.0184498	0.0417862	0.0303228	0.0253524	4.76325	4.79878	4.82864	4.90626	4.88037	4.92454	0.0277656	0.0437924	0.0340371	0.0157005	0.0318404	0.0383624
pol_pos_2172	4.55694	4.61238	4.65524	4.76043	4.58474	4.59689	0.0484363	0.0445776	0.0544329	0.0173561	0.0770626	0.0662413	4.55832	4.60578	4.70752	4.62581	4.68871	4.52383	0.0541608	0.0710513	0.0816309	0.0951125	0.0448455	0.0611585	4.3526	4.38847	4.55903	4.57825	4.50168	4.55345	0.0877433	0.0532182	0.0556176	0.0528166	0.0568139	0.0654057	4.38944	4.46474	4.56909	4.59534	4.54921	4.47552	0.0561916	0.0842293	0.0763855	0.0597205	0.0714434	0.0552847
pol_pos_2191	6.2336	6.22768	6.25584	6.34442	6.22751	6.17759	0.0493268	0.0446814	0.0467985	0.0277498	0.056636	0.0256196	6.2276	6.23847	6.37096	6.29332	6.27964	6.27426	0.0557122	0.0469953	0.0645293	0.0391891	0.0278649	0.035858	6.15046	6.19637	6.33809	6.20262	6.29531	6.18608	0.0182187	0.0267938	0.0343014	0.0655207	0.0373018	0.0230477	6.14777	6.24865	6.37411	6.32119	6.30577	6.32842	0.0323237	0.0336618	0.0508428	0.0400451	0.041771	0.0549084
pol_pos_2405	4.37484	4.53794	4.57624	4.53753	4.57937	4.45257	0.228524	0.144952	0.139389	0.183299	0.190581	0.168619	4.634	4.34359	4.52834	4.80447	4.94283	5.7166	0.254684	0.116103	0.21528	0.181675	0.130973	0.0955231	3.96034	3.89572	3.93815	3.86692	3.71563	4.26439	0.0847279	0.0781849	0.0683223	0.163086	0.0974376	0.110673	4.24384	3.97356	3.98018	4.11554	4.38716	5.61813	0.18465	0.0333009	0.143157	0.171817	0.166585	0.128894
pol_pos_2410	5.08045	5.26892	5.40862	5.37191	5.33131	5.00098	0.0439969	0.0400109	0.0800087	0.065932	0.103715	0.0991988	5.19493	5.40701	5.31837	5.36459	5.2102	5.17565	0.0551273	0.0701436	0.027482	0.0747497	0.086052	0.0531433	5.57682	5.65985	5.62752	5.71901	5.72041	5.61142	0.0964375	0.0955649	0.0902191	0.0639787	0.0422887	0.102527	5.7583	5.64852	5.81475	5.71595	5.65396	5.48622	0.0905913	0.0511938	0.0693426	0.141274	0.125025	0.0607458
pol_pos_2434	4.79891	4.62448	4.89083	4.88742	4.85082	4.97984	0.0432763	0.100796	0.0433004	0.0279346	0.0459463	0.0324215	4.67661	4.84286	5.03775	4.82065	4.97188	4.90878	0.125496	0.0478456	0.0796304	0.172187	0.0552103	0.0254239	4.28568	4.3273	4.56631	4.47476	4.53219	4.67548	0.0710439	0.0815861	0.0635046	0.0600212	0.041454	0.0581908	4.44023	4.52763	4.64798	4.71059	4.68918	4.64244	0.0260704	0.0678518	0.0307817	0.0375193	0.0476497	0.0368473
pol_pos_2442	4.01166	3.75178	NA	NA	3.78537	4.24634	0.0763719	0.0620201	NA	NA	0.0813486	0.0858553	3.85639	3.75755	NA	NA	3.90511	4.29966	0.162575	0.0998133	NA	NA	0.096362	0.0449175	4.57751	4.30537	3.8067	3.79694	4.1809	4.55335	0.0978455	0.126991	0.0841458	0.0259915	0.0951383	0.0651833	4.5213	4.11032	3.88478	3.81827	4.18009	4.39179	0.0739441	0.0578964	0.126634	0.181245	0.0813873	0.0754811
pol_pos_2443	4.0312	4.18512	4.21588	4.27668	4.20032	4.14493	0.0473936	0.0396747	0.0378345	0.0361343	0.103881	0.0544423	4.19922	4.21391	4.38908	4.19507	4.38924	4.19746	0.0786618	0.0405602	0.0723221	0.103318	0.0515667	0.0651045	4.54749	4.49563	4.74419	4.66827	4.64587	4.80695	0.0442379	0.0354315	0.0253931	0.0366946	0.0392075	0.0262375	4.60545	4.62403	4.74941	4.77102	4.74525	4.78782	0.0544426	0.0432981	0.0363779	0.0318475	0.0571013	0.0535871
pol_pos_2491	4.47738	4.57258	4.58288	4.69207	4.63572	4.68601	0.0386174	0.0456837	0.0264086	0.0221859	0.0572787	0.0275771	4.61601	4.63308	4.72336	4.6639	4.78513	4.70286	0.0629344	0.0258593	0.0546349	0.0604484	0.0336069	0.0527657	4.52162	4.54154	4.65384	4.54292	4.54825	4.70466	0.0441988	0.0373996	0.0232099	0.0646809	0.0380795	0.0391047	4.64431	4.62195	4.61048	4.71659	4.69711	4.74092	0.033095	0.0529562	0.0495136	0.0292157	0.0366467	0.0543335
pol_pos_2498	4.3188	4.32265	4.33513	4.46322	4.32388	4.30089	0.0617525	0.0696429	0.0558476	0.0308739	0.0570296	0.0730037	4.31359	4.29568	4.27221	4.33224	4.31469	4.33414	0.0488653	0.0657797	0.0834738	0.0595354	0.0523227	0.0597437	4.31706	4.30048	4.34364	4.38346	4.34377	4.31238	0.0632672	0.0702291	0.0502413	0.0608778	0.0482603	0.0513814	4.32077	4.33067	4.357	4.34046	4.33452	4.36093	0.0619511	0.0764345	0.0462302	0.0777812	0.0587342	0.0668068
pol_pos_2525	4.08898	3.9765	3.87764	NA	4.05944	4.36456	0.0498852	0.0866478	0.0560172	NA	0.0536032	0.0348593	3.96736	3.89096	3.90281	3.9241	4.24855	4.76626	0.0463777	0.0518439	0.0717984	0.0336025	0.0701897	0.0767997	4.00363	3.78188	NA	NA	3.92972	4.48691	0.0732518	0.0314439	NA	NA	0.129794	0.0815099	4.14603	NA	NA	NA	4.17691	4.6985	0.0465589	NA	NA	NA	0.0678832	0.111431
pol_pos_2527	4.51225	4.52463	4.49165	4.48016	4.48668	4.47511	0.0242828	0.0402498	0.0295461	0.0536096	0.0265107	0.0442263	4.47066	4.53504	4.54701	4.4967	4.51597	4.46593	0.032367	0.0407803	0.0345027	0.0530141	0.0321968	0.035337	4.48888	4.52036	4.48788	4.51858	4.50446	4.50638	0.0229018	0.0335913	0.0338444	0.0455991	0.0356955	0.041471	4.48433	4.53963	4.4732	4.51363	4.52765	4.48305	0.0306512	0.034758	0.0371741	0.038795	0.0331843	0.0369441
pol_pos_2543	5.90053	5.97975	5.98305	5.94349	5.89225	6.0446	0.0261285	0.0569289	0.0384092	0.0423361	0.0707157	0.0488382	6.06947	6.13574	6.0303	5.86574	6.03154	5.95983	0.045928	0.0466205	0.0456614	0.0832392	0.0294339	0.0315279	6.0198	6.00882	6.00817	6.01049	6.02416	6.07465	0.0463048	0.030181	0.0245558	0.0555011	0.027862	0.0326142	6.04542	6.0834	6.07799	6.01123	5.96361	6.0113	0.0390964	0.035316	0.0377626	0.0236587	0.0257887	0.0228778
pol_pos_2555	5.10353	5.07038	5.0917	5.11108	5.03913	5.08904	0.020874	0.0244803	0.024794	0.0248716	0.0362278	0.0247891	5.05795	5.07586	5.11061	5.07384	5.08725	5.02449	0.0284421	0.0351805	0.0395133	0.0430646	0.0242033	0.0281235	5.01604	4.99688	5.08306	5.00277	5.00665	5.08085	0.0312211	0.0262094	0.0210477	0.0529241	0.032949	0.0239181	5.00086	5.03613	5.07516	5.05006	5.05129	5.04692	0.0287232	0.0344268	0.0318204	0.0317738	0.0389049	0.0341942
pol_pos_2593	5.27995	5.28856	5.33911	5.34127	5.29301	5.39577	0.0250464	0.0161068	0.0239278	0.0241344	0.0444562	0.0163826	5.23567	5.28576	5.35085	5.31928	5.40113	5.32508	0.0413976	0.0361888	0.0509034	0.0515146	0.0284364	0.028836	5.15807	5.15525	5.31428	5.25389	5.24721	5.4109	0.0305831	0.0282081	0.0226115	0.0404056	0.0314052	0.0259682	5.216	5.26728	5.27015	5.34016	5.32048	5.36411	0.0253612	0.0442637	0.029313	0.0149687	0.0348033	0.0388139
pol_pos_2625	4.26246	4.21364	4.29294	4.27083	4.14421	4.28391	0.0356441	0.0271927	0.0226728	0.0229357	0.0795138	0.023392	4.22253	4.20112	4.29153	4.27893	4.29779	4.24123	0.0386528	0.0400251	0.0617078	0.0218606	0.0266985	0.0451772	4.20669	4.18543	4.28804	4.30938	4.20302	4.35083	0.0474939	0.0342854	0.0371113	0.0474167	0.0513652	0.0381096	4.2633	4.2907	4.30268	4.33271	4.30853	4.37511	0.0235316	0.0502457	0.0498247	0.0159761	0.0420945	0.0618295
pol_pos_263	4.46037	4.38452	4.28251	4.56758	4.4676	4.4759	0.084847	0.0683957	0.139508	0.0712768	0.0603424	0.0754231	4.36903	4.22886	4.47128	4.45593	4.50968	4.39616	0.0969513	0.180802	0.0924667	0.101612	0.0725194	0.0835827	4.38845	4.25017	4.41904	4.53786	4.4705	4.35996	0.0529594	0.0755001	0.0549048	0.0720025	0.0918073	0.0658117	4.27114	4.37223	4.34918	4.5569	4.46052	4.41232	0.0946082	0.0746497	0.0569675	0.066056	0.0982728	0.0580193
pol_pos_2704	5.42994	5.49748	5.57316	5.62831	5.62939	5.45131	0.0319514	0.0260143	0.0415551	0.0295295	0.0304108	0.0310256	5.52562	5.54321	5.55793	5.63517	5.58932	5.39871	0.050437	0.0425833	0.03848	0.0250959	0.0452014	0.0461874	5.53779	5.68917	5.62898	5.82213	5.77933	5.52102	0.0375854	0.0226797	0.0231918	0.00908888	0.0257419	0.0220858	5.59646	5.60901	5.72488	5.76915	5.64417	5.45548	0.0225484	0.0379293	0.0343566	0.0207276	0.0164846	0.0335726
pol_pos_2718	4.82334	4.87347	4.89644	4.96934	4.89467	4.90831	0.0475445	0.0363001	0.0383287	0.0175752	0.0420269	0.0325944	4.85429	4.8755	4.84655	4.90583	4.89332	4.90203	0.0475488	0.041708	0.0422022	0.0367853	0.0486103	0.0378837	4.85305	4.8764	4.90425	4.93482	4.89841	4.90282	0.0457764	0.0359715	0.0358106	0.0438348	0.0450619	0.0343823	4.8577	4.8905	4.91808	4.91766	4.90033	4.88445	0.0537971	0.0390191	0.0390805	0.039666	0.040998	0.0377126
pol_pos_2744	4.04597	4.16117	4.22248	4.54559	4.26236	4.32333	0.208765	0.193875	0.234933	0.206188	0.233969	0.26052	4.28977	4.15099	4.17244	4.34718	4.37779	4.40525	0.206792	0.187873	0.180478	0.186706	0.189735	0.222933	4.32601	4.22423	4.29509	4.44634	4.37913	4.40435	0.206122	0.182655	0.210825	0.203407	0.197349	0.220808	4.27149	4.20715	4.46687	4.29006	4.35093	4.42715	0.215253	0.180658	0.193724	0.219334	0.206428	0.203006
pol_pos_2756	4.73497	4.75737	4.81037	4.69518	4.65119	4.68314	0.0753222	0.0784004	0.0649758	0.0130694	0.0777619	0.0557552	4.7439	4.77762	4.82328	4.61919	4.69825	4.60063	0.0779644	0.073066	0.0914598	0.0684305	0.087694	0.067438	4.56847	4.54633	4.70316	4.49254	4.49324	4.49326	0.0671606	0.0535687	0.0585075	0.0882465	0.072477	0.0709284	4.57444	4.66472	4.67739	4.55278	4.5044	4.35016	0.0676741	0.0760207	0.071481	0.0735251	0.0812786	0.0970349
pol_pos_2899	3.88279	4.04814	4.10725	3.95472	4.17072	3.99846	0.0270825	0.0507798	0.0392906	0.0334595	0.0842673	0.0585475	4.02976	4.12592	4.1019	4.10822	4.11271	4.01333	0.0118678	0.0550096	0.0366699	0.065129	0.0482437	0.0413011	4.3278	4.40494	4.47838	4.31195	4.56157	4.44417	0.0899668	0.0539161	0.0597717	0.0893386	0.0550826	0.115625	4.41	4.39872	4.56066	4.40621	4.55654	4.28418	0.104972	0.0576389	0.0557817	0.0886308	0.0836221	0.06039
pol_pos_2900	4.99903	5.04895	5.11375	5.18809	5.11609	5.14924	0.0340688	0.0412456	0.0522082	0.0264446	0.0511772	0.0371984	5.02136	5.08682	5.13219	5.12722	5.2087	5.09843	0.0535069	0.0497733	0.0547027	0.0428106	0.0577313	0.0524581	4.45529	4.56666	4.64575	4.66174	4.68157	4.61821	0.0788598	0.0465199	0.0473296	0.050172	0.0414661	0.0545029	4.4962	4.57184	4.70653	4.75226	4.63385	4.50158	0.063676	0.0705572	0.0458525	0.0558204	0.0428843	0.0700982
pol_pos_292	6.13518	6.04774	6.08276	6.0028	5.87942	5.95951	0.0464982	0.0546385	0.0972979	0.0183446	0.0751877	0.0472736	6.14321	6.04013	6.10056	5.87395	5.92974	6.0184	0.0910493	0.0731835	0.101153	0.0848006	0.0494797	0.0855021	6.00309	5.92777	5.97606	5.77901	5.72204	5.79033	0.0716554	0.0755519	0.0567109	0.0832016	0.0800333	0.0867172	5.9798	5.98444	6.00147	5.77528	5.70241	5.7694	0.054742	0.0493263	0.0710199	0.0632768	0.0726952	0.0594295
pol_pos_2930	NA	3.87031	NA	NA	NA	3.82652	NA	0.0534091	NA	NA	NA	0.0089247	NA	NA	NA	NA	NA	4.08588	NA	NA	NA	NA	NA	0.030349	4.49858	4.44386	4.55197	4.51963	4.46604	4.75884	0.0491844	0.0299277	0.0333599	0.0604526	0.0435171	0.045336	4.50743	4.56541	4.56537	4.54217	4.60683	4.96099	0.0496825	0.0605404	0.0387259	0.0356603	0.0631988	0.0868026
pol_pos_3002	4.5345	4.29072	4.45237	4.31217	4.33715	4.20217	0.0826262	0.0803664	0.0876135	0.0936741	0.135742	0.106606	4.3006	3.93044	4.28626	4.49898	4.63511	4.31243	0.0851074	0.120702	0.114495	0.14281	0.112926	0.0746538	NA	NA	NA	3.48182	NA	NA	NA	NA	NA	0.0938638	NA	NA	NA	NA	NA	NA	NA	NA	NA	NA	NA	NA	NA	NA
pol_pos_3028	5.57852	5.53325	5.49708	5.77791	5.65863	5.60845	0.0980574	0.0760332	0.13199	0.0606054	0.066963	0.0885269	5.51469	5.4481	5.59502	5.62016	5.66682	5.56365	0.0989684	0.143351	0.106385	0.0959875	0.0905431	0.0939007	5.50887	5.43363	5.57515	5.74294	5.63518	5.52284	0.0616586	0.0568454	0.0563303	0.0946751	0.103434	0.073012	5.42341	5.54474	5.55577	5.70175	5.65395	5.59361	0.103207	0.0831921	0.0823896	0.0624836	0.113545	0.0719309
pol_pos_3052	4.06432	4.12819	4.273	4.4669	4.26461	4.30048	0.148971	0.141628	0.130179	0.0347702	0.152299	0.124215	4.08306	4.09256	4.16377	4.30959	4.36833	4.15034	0.13897	0.156747	0.190938	0.134142	0.142954	0.118518	3.96508	4.03434	4.18755	4.33861	4.23478	4.30409	0.174396	0.145172	0.133535	0.117165	0.135451	0.123186	3.9723	4.05252	4.23582	4.29187	4.26991	4.25149	0.170555	0.178905	0.155638	0.132673	0.145314	0.147873
pol_pos_31	5.36212	5.38698	5.42248	5.30234	5.28636	5.32425	0.0360855	0.041805	0.0379521	0.00898315	0.0432253	0.0343378	5.39188	5.41662	5.45649	5.27278	5.34834	5.33366	0.0393374	0.0403585	0.0539926	0.0392704	0.0467633	0.0435836	5.31484	5.32198	5.40066	5.2626	5.26636	5.30284	0.0469951	0.0313131	0.0324896	0.0320309	0.0436559	0.04244	5.36442	5.41299	5.4366	5.29148	5.28368	5.27262	0.0349635	0.0401014	0.0421733	0.034892	0.0404198	0.0417837
pol_pos_3152	4.60446	4.41256	4.65324	4.59275	4.5844	4.70692	0.115812	0.0955461	0.054931	0.0587604	0.0747315	0.0627562	4.49092	4.559	4.45591	4.61565	4.48032	4.64922	0.0543669	0.0793341	0.106688	0.0955707	0.0622051	0.0761566	4.97544	4.94971	5.06373	4.9565	4.95299	5.12135	0.0622217	0.0619505	0.0488324	0.0207431	0.0657657	0.0714735	4.96945	5.02651	5.08334	5.03367	5.02832	5.04237	0.0543739	0.0698427	0.0730669	0.0697258	0.0623758	0.0766572
pol_pos_3197	4.05395	4.10474	4.22638	4.33108	4.22872	4.27368	0.0820253	0.0934361	0.0418217	0.0601338	0.0842389	0.072685	4.14014	4.11003	4.27568	4.39959	4.41846	4.31636	0.141016	0.072626	0.0753454	0.0705361	0.0566895	0.0552793	4.53097	4.55403	4.71806	4.87044	4.7666	4.91487	0.0690027	0.0477395	0.0462566	0.0482154	0.0548723	0.0607878	4.70308	4.70637	4.85321	4.98408	4.91885	5.09462	0.0682385	0.0893883	0.0464509	0.039655	0.0579527	0.051396
pol_pos_3201	4.27137	4.27312	4.31743	4.37341	4.31381	4.30273	0.0396505	0.0478803	0.0364446	0.0229806	0.0372853	0.0482952	4.29594	4.27272	4.2743	4.30953	4.30975	4.3142	0.0462456	0.0397871	0.0368601	0.0428344	0.0422522	0.0476046	4.28537	4.27214	4.30606	4.32827	4.31296	4.30016	0.0404594	0.0391891	0.0355265	0.0433168	0.0479656	0.0454177	4.28037	4.33485	4.33322	4.30947	4.3015	4.32017	0.0477875	0.0740407	0.034039	0.0380676	0.0412687	0.0468624
pol_pos_3231	4.5037	4.39877	4.45543	4.3613	4.36236	4.38164	0.0701192	0.0494107	0.0327282	0.0539055	0.0977794	0.0500192	4.50018	4.39257	4.48705	4.42581	4.53414	4.44913	0.138177	0.0584179	0.0638312	0.0898934	0.0453236	0.0367919	4.14764	4.04609	4.23099	4.20046	4.18457	4.29383	0.0411087	0.0648745	0.0453279	0.0489606	0.0626069	0.0510491	4.12824	4.22865	4.24944	4.2497	4.2645	4.39282	0.0830969	0.0706265	0.0347803	0.0427331	0.0727178	0.0421979
pol_pos_3338	4.0737	4.12217	3.94696	4.07152	4.97036	5.25293	0.0890397	0.0549901	0.0445061	0.069562	0.056749	0.100579	4.07335	3.90306	3.945	3.92335	5.06299	4.9689	0.119221	0.0579184	0.0368761	0.0917925	0.0646256	0.0678544	4.85124	4.76586	4.69595	4.92392	5.47642	5.57306	0.0559436	0.0682889	0.0750895	0.106302	0.0738231	0.071021	4.75486	4.76705	4.60344	4.86775	5.47159	5.54053	0.0648172	0.0682394	0.103051	0.0593547	0.060647	0.0882888
pol_pos_3394	NA	NA	NA	NA	NA	NA	NA	NA	NA	NA	NA	NA	NA	NA	NA	NA	NA	NA	NA	NA	NA	NA	NA	NA	4.14477	4.11442	4.20923	4.18001	4.14524	4.5806	0.0407112	0.0329728	0.0329122	0.0953539	0.0556714	0.0596713	4.24776	4.20624	4.2401	4.24603	4.3854	4.96293	0.0471327	0.0736167	0.0331701	0.0448937	0.0605337	0.103802
pol_pos_3434	4.25893	4.23927	4.35703	4.50868	4.36232	4.40716	0.128257	0.135943	0.137684	0.128632	0.138413	0.16131	4.40201	4.25676	4.20481	4.35409	4.36577	4.41529	0.134147	0.134267	0.147435	0.136921	0.142041	0.149959	4.34353	4.22949	4.36968	4.4133	4.38729	4.39967	0.146749	0.134878	0.139121	0.145536	0.148662	0.157619	4.32143	4.29641	4.4508	4.32183	4.35735	4.40819	0.146491	0.145338	0.130437	0.140652	0.139701	0.156884
pol_pos_3451	4.69429	4.70556	4.66152	4.45039	4.54332	4.36591	0.158927	0.136448	0.0912465	0.119972	0.124618	0.0935016	4.76359	4.3631	4.64568	4.67507	4.68246	4.64655	0.226559	0.0655089	0.116635	0.13633	0.0647296	0.0663226	3.82708	3.79229	4.109	4.24549	3.78053	4.14637	0.0589879	0.049325	0.126145	0.112241	0.0922358	0.0902907	4.13602	4.00537	3.80879	3.78099	3.9173	4.16639	0.172343	0.0430577	0.110764	0.117552	0.11599	0.0894688
pol_pos_3459	4.81099	4.9258	4.86518	4.97846	4.88749	4.82414	0.0247104	0.0339284	0.0365487	0.0240947	0.0593212	0.0436746	4.95166	4.93586	4.97089	4.92309	4.9698	4.8105	0.0149391	0.0250516	0.026894	0.0600213	0.026592	0.020326	4.76423	4.78945	4.87874	4.86226	4.86636	4.88167	0.0351686	0.0363113	0.0174625	0.0352366	0.020678	0.0281543	4.86992	4.85301	4.85722	4.94794	4.9219	4.91667	0.0293186	0.0349163	0.0360278	0.0246355	0.0373019	0.0427067
pol_pos_346	5.50576	5.61115	5.77229	5.7073	5.53403	5.45956	0.0419098	0.0509152	0.0523778	0.0316065	0.0739343	0.0620843	5.57783	5.75608	5.78223	5.59792	5.50642	5.5052	0.0464984	0.0569537	0.0608296	0.086963	0.0425893	0.0623169	5.4596	5.54686	5.68972	5.61094	5.44828	5.5063	0.0578333	0.0409131	0.0578559	0.068769	0.0541507	0.0526361	5.55515	5.71852	5.76622	5.6617	5.44846	5.57826	0.0514447	0.0721938	0.0562463	0.0524591	0.062986	0.0618805
pol_pos_347	4.01883	4.03434	3.90274	3.97302	3.96007	4.09717	0.0333179	0.0514602	0.069502	0.0536594	0.0535669	0.0503015	4.05225	4.02507	3.96863	4.08786	4.14639	4.85587	0.0645158	0.0521382	0.0813137	0.0947097	0.0640509	0.0524649	3.97316	3.88219	3.97691	3.85683	3.94414	4.21423	0.0331355	0.0250856	0.104356	0.0384561	0.0436895	0.0922483	4.07539	4.05725	4.02979	4.0245	4.20704	4.82397	0.0411063	0.060278	0.0262256	0.0390825	0.025647	0.133958
pol_pos_3485	4.57369	4.58225	4.5591	4.60727	4.5348	4.79319	0.061154	0.0450696	0.0802138	0.0493603	0.0854285	0.0532415	4.5701	4.55373	4.54664	4.55428	4.67721	4.82936	0.0843642	0.0625606	0.100768	0.0668108	0.0535326	0.0803618	4.96699	4.90619	4.93651	4.92513	4.95249	5.21	0.0965826	0.10175	0.0569554	0.02964	0.0910555	0.0635363	5.00419	4.97529	5.03287	4.82945	5.03779	5.26183	0.082947	0.0758479	0.0694057	0.0774073	0.086838	0.0693675
pol_pos_3494	6.12305	6.1866	6.10626	6.15033	6.04608	6.0421	0.0627411	0.0334362	0.0527107	0.023552	0.0893308	0.0409202	6.20752	6.08224	6.16542	6.1066	6.2615	6.28273	0.069885	0.0343229	0.0616415	0.0542964	0.0480516	0.0288093	5.88226	5.86931	5.93169	5.88957	5.8246	5.89591	0.0215707	0.0312936	0.0293358	0.0339927	0.0452698	0.0289731	5.84775	5.84518	5.8726	5.85119	5.88688	6.15207	0.0595111	0.0299181	0.0426472	0.0317456	0.0340759	0.0603421
pol_pos_3522	4.14146	4.18641	4.20041	4.31678	4.23553	4.27091	0.0270585	0.0489408	0.058268	0.0297222	0.06971	0.0340329	4.15425	4.19844	4.31839	4.24738	4.41665	4.28283	0.0548916	0.0514638	0.0722689	0.0486824	0.0549717	0.0558372	3.72876	3.77619	3.99978	3.94093	3.98445	4.06761	0.0733892	0.047683	0.0504617	0.122532	0.0611413	0.0403818	3.83614	3.93299	3.98521	4.01079	4.0669	4.12705	0.0572759	0.0709053	0.0567229	0.0555189	0.0649846	0.0769231
pol_pos_3534	4.4106	4.40842	4.48406	4.54909	4.41174	4.48928	0.0747468	0.0580451	0.0380576	0.0410919	0.0689232	0.0246567	4.39068	4.41036	4.45834	4.4325	4.45879	4.38393	0.0715644	0.0680731	0.040642	0.0565742	0.0354655	0.0678903	4.31938	4.30131	4.43046	4.38399	4.40322	4.43116	0.0603406	0.0388928	0.0463236	0.0559641	0.0484178	0.0507863	4.33719	4.37348	4.39997	4.41666	4.43651	4.41534	0.0529294	0.0601197	0.0815888	0.0357196	0.0783085	0.0604565
pol_pos_3556	4.22404	4.2129	4.21044	4.36382	4.27065	4.33591	0.0587843	0.0526003	0.0731594	0.0337296	0.0745358	0.030071	4.18756	4.22513	4.30337	4.2613	4.3323	4.25456	0.0846845	0.0833732	0.106117	0.0786511	0.0628381	0.059419	4.5378	4.50189	4.60494	4.56175	4.55535	4.62747	0.0487758	0.051542	0.0531343	0.0704055	0.0529744	0.0457811	4.5242	4.52397	4.58651	4.55567	4.63362	4.6233	0.0346521	0.0816543	0.0670296	0.0632672	0.0476986	0.0530311
pol_pos_3563	NA	NA	NA	NA	NA	NA	NA	NA	NA	NA	NA	NA	NA	NA	NA	NA	3.69297	NA	NA	NA	NA	NA	0.0142445	NA	5.03253	4.98243	5.07928	5.02697	5.04253	5.15833	0.0335679	0.0333733	0.0203958	0.0450833	0.0224281	0.0274098	5.08585	5.10214	5.07713	5.08234	5.11615	5.17756	0.0442804	0.0410187	0.0274703	0.0216876	0.0351249	0.0436111
pol_pos_3610	3.78773	3.77905	3.90838	4.1285	3.88256	4.16027	0.107106	0.134969	0.11083	0.0454798	0.168646	0.0869312	3.85382	3.78462	4.07515	4.02186	4.19786	4.29851	0.0941374	0.155504	0.165689	0.130988	0.113617	0.136888	3.56742	3.59706	3.84309	3.81329	3.888	4.24522	0.0809382	0.116648	0.15376	0.0966706	0.149151	0.101101	3.61203	3.89795	4.07354	4.15894	4.20459	4.47797	0.160537	0.168623	0.136898	0.11922	0.123452	0.145473
pol_pos_3619	4.92116	4.92001	4.93985	4.9965	4.95354	5.05954	0.0302438	0.0350678	0.0184947	0.0230484	0.0558143	0.0249924	4.92464	4.91271	4.91671	5.00771	5.09027	4.96334	0.0585664	0.0441945	0.0523316	0.041409	0.0319656	0.032408	5.30078	5.28795	5.42418	5.42	5.41196	5.53829	0.0449906	0.0318255	0.0319512	0.0200966	0.0529476	0.0419236	5.36472	5.36013	5.37991	5.43748	5.48078	5.43567	0.0410142	0.038226	0.0405014	0.0424037	0.0421959	0.051826
pol_pos_3626	4.10109	4.48455	4.45272	4.22976	4.0872	4.19685	0.0824515	0.182715	0.20218	0.193658	0.152869	0.317129	4.20178	4.3238	4.49515	4.16998	4.12262	3.99151	0.16624	0.18341	0.121902	0.133185	0.160057	0.0951066	4.24445	4.31994	4.45731	3.7434	3.91087	4.32633	0.296589	0.135752	0.208326	0.373978	0.056043	0.245066	4.38785	4.24351	4.21137	3.85657	4.2097	4.26656	0.107127	0.172285	0.147179	0.167927	0.189166	0.221601
pol_pos_3630	NA	4.36032	4.50539	4.46771	4.49942	4.54981	NA	0.00541783	0.03013	0.0349422	0.0535986	0.0530607	4.33999	4.43172	4.36246	4.68698	4.42059	4.41614	0.0699054	0.0408388	0.0137399	0.0178681	0.0545977	0.0429631	NA	NA	NA	4.28322	4.22754	4.42598	NA	NA	NA	0.0407593	0.0628689	0.0148226	NA	NA	NA	4.33049	4.31056	NA	NA	NA	NA	0.0394535	0.0595798	NA
pol_pos_3822	4.64241	4.60375	4.5508	4.59539	4.50354	4.47304	0.022715	0.0299583	0.0517153	0.0715739	0.0494922	0.0321201	4.58958	4.62432	4.65912	4.45939	4.54694	4.40986	0.0567327	0.0352842	0.0598718	0.0802641	0.0333733	0.0590549	4.00722	4.02615	4.03471	3.93294	3.9378	3.84674	0.0676625	0.0535954	0.0787971	0.0831303	0.0655442	0.0691131	3.86012	4.02076	4.09803	4.03233	3.90614	3.97582	0.109412	0.0601653	0.0140854	0.0285466	0.0828413	0.0215249
pol_pos_385	4.37975	4.42452	4.48421	4.44305	4.31276	4.36355	0.0312978	0.0596676	0.0503261	0.0104376	0.0558736	0.0475712	4.44603	4.42689	4.49784	4.39176	4.49191	4.45889	0.0617036	0.0516246	0.0663357	0.0468209	0.06621	0.071726	4.38403	4.4487	4.56556	4.52446	4.41791	4.48434	0.064113	0.0438283	0.0370954	0.0333046	0.0630653	0.0474174	4.50243	4.55972	4.61877	4.58321	4.47789	4.49603	0.0541833	0.0504665	0.0606271	0.0469713	0.0493256	0.0705039
pol_pos_3851	3.95192	4.00411	4.09002	4.16516	3.99601	4.24761	0.0610959	0.0640092	0.0523331	0.0158788	0.0984171	0.0593688	3.9473	3.97554	4.10958	4.10949	4.24732	4.13068	0.0857777	0.0994555	0.0855354	0.0799555	0.0534226	0.0796558	3.91273	3.84851	4.07509	4.09884	4.10897	4.28551	0.0823448	0.0586751	0.0682337	0.0723002	0.0809824	0.0852461	3.96632	3.99571	4.05219	4.14976	4.13664	4.12292	0.0687802	0.118523	0.0763195	0.0767705	0.0860388	0.0870357
pol_pos_3916	4.04337	4.03178	3.92267	3.891	4.09204	4.17131	0.052035	0.0739391	0.0722498	0.0428477	0.0433976	0.0486494	4.01666	4.11487	3.99343	3.9085	4.25323	4.24109	0.0454433	0.0933742	0.117847	0.0234618	0.0493588	0.0579875	4.0442	4.01265	3.91998	3.9157	4.0746	4.23849	0.0598815	0.0775909	0.0209847	0.0462959	0.0570967	0.0775444	4.0577	4.05492	3.95586	4.02692	4.12533	4.29252	0.064615	0.0949425	0.0443703	0.0408684	0.0617801	0.0772193
pol_pos_3937	4.02062	4.16118	4.122	4.1932	3.98145	4.07071	0.0326101	0.0298311	0.038177	0.0816604	0.068065	0.0284174	4.18046	4.21838	4.2434	4.0664	4.21542	4.18749	0.0661546	0.0432319	0.0535846	0.0995291	0.0547551	0.041099	5.2784	5.24315	5.29738	5.28787	5.24244	5.28929	0.038945	0.0319094	0.0195588	0.0345109	0.0277322	0.0250066	5.31332	5.29086	5.30563	5.30541	5.28822	5.32242	0.0332394	0.041336	0.0234005	0.0208811	0.0318207	0.0347791
pol_pos_3960	4.18953	4.35978	4.24348	4.35626	4.25509	4.24832	0.0679614	0.0841899	0.0705993	0.115978	0.109413	0.151069	4.31885	4.41967	4.10538	4.37203	3.84483	4.11135	0.105126	0.107805	0.0738832	0.0952651	0.0792492	0.063029	4.20708	4.25043	4.42717	4.23976	4.34276	4.21011	0.108215	0.118123	0.0640166	0.14244	0.0868766	0.0998239	4.4955	4.41789	4.45992	4.28997	4.32213	4.04546	0.0612349	0.0459949	0.0833617	0.0716706	0.053934	0.0619141
pol_pos_3981	4.09472	4.14056	3.9568	4.12728	4.03742	4.27699	0.0401689	0.0713489	0.0889596	0.0252798	0.0606471	0.0455117	4.06083	3.99977	3.95514	4.07967	4.16251	4.26321	0.0361585	0.0159797	0.0735969	0.0701258	0.0446394	0.0810235	4.42779	4.24595	4.19225	4.41069	4.17231	4.52937	0.0451687	0.0591547	0.0411465	0.0503203	0.0655879	0.0616953	4.33819	4.32962	4.15749	4.56669	4.35276	4.65534	0.038029	0.046574	0.0664523	0.0616387	0.0660774	0.0748558
pol_pos_4017	4.7674	4.77409	4.79522	4.87666	4.77496	4.85672	0.0339347	0.0252137	0.0310584	0.0326644	0.0453543	0.0230805	4.74722	4.78175	4.86931	4.82883	4.88006	4.85537	0.0606537	0.0364117	0.0583552	0.071591	0.0299747	0.0328479	4.68497	4.65054	4.81578	4.8178	4.75353	4.88245	0.023229	0.0246011	0.0291551	0.0453503	0.0386246	0.0438745	4.67465	4.75382	4.79837	4.83839	4.81199	4.82438	0.0440657	0.0452218	0.0401801	0.0288093	0.0501667	0.0571748
pol_pos_4053	4.2322	4.17324	4.3821	4.37839	4.31821	4.48777	0.066154	0.0647015	0.0525933	0.0293514	0.0688901	0.0389685	4.23377	4.31538	4.52878	4.49297	4.47236	4.37798	0.118394	0.0576496	0.10195	0.0493901	0.0576039	0.0395867	3.69055	3.67928	3.88379	3.88703	3.86462	4.02953	0.0361081	0.0489878	0.10296	0.011997	0.0396708	0.0791518	3.69157	3.85679	4.00599	4.03846	4.03489	4.03183	0.0424422	0.0965793	0.0512983	0.0666389	0.0718036	0.0563795
pol_pos_4076	4.55048	4.65142	4.5892	4.65754	4.50527	4.56582	0.0203974	0.0386817	0.0282717	0.068468	0.0640289	0.0164369	4.6491	4.68169	4.71301	4.54563	4.72469	4.69484	0.0520371	0.0403802	0.041607	0.0879236	0.0548122	0.0410474	6.04966	6.01209	6.08176	6.0936	6.05338	6.13126	0.0455182	0.0369891	0.0248388	0.0365152	0.0228657	0.0305525	6.09796	6.11484	6.10439	6.09907	6.10825	6.16352	0.0435213	0.044965	0.0322804	0.0158512	0.0313007	0.03736
pol_pos_4165	4.62145	4.44082	4.58952	4.72615	4.54886	4.69689	0.0709177	0.119532	0.12077	0.026601	0.119371	0.0848505	4.58786	4.48734	4.59493	4.48269	4.78061	4.60884	0.0720779	0.106762	0.156229	0.107102	0.0663054	0.114091	4.41019	4.37853	4.32573	4.43244	4.49131	4.41873	0.120622	0.105673	0.0965121	0.160557	0.122911	0.0881343	4.26854	4.34663	4.4319	4.45136	4.36792	4.20765	0.103674	0.121126	0.098936	0.0926071	0.0933254	0.115734
pol_pos_4186	5.75883	5.72894	5.77628	5.86957	5.81159	5.84402	0.0466866	0.0396469	0.042678	0.0116408	0.0499493	0.0239205	5.73494	5.75246	5.79038	5.80792	5.85946	5.79807	0.0649122	0.053071	0.0721545	0.0487031	0.0463044	0.0348567	5.99314	5.96884	6.06814	6.01422	6.01874	6.0788	0.0413661	0.0377423	0.0379529	0.0618686	0.0423516	0.0406295	5.98717	6.01546	6.04932	6.02513	6.08272	6.08009	0.0292943	0.0593084	0.0541332	0.049532	0.0459856	0.0487199
pol_pos_4218	4.8546	4.67722	4.9039	4.93585	4.98324	5.16015	0.0761557	0.114401	0.0892235	0.0698244	0.0753353	0.0362989	4.73765	4.90283	4.98719	5.0701	4.95096	5.1172	0.137295	0.0720573	0.0717309	0.0903101	0.0630228	0.0746229	4.60135	4.53918	4.862	4.5414	4.73094	5.02587	0.0647773	0.101517	0.074285	0.116295	0.0883116	0.0837966	4.62195	4.77583	4.90741	4.84423	4.8877	4.95394	0.0876749	0.10028	0.0621269	0.0830698	0.0582985	0.0762581
pol_pos_4239	3.38964	3.51761	3.6661	3.92592	3.54834	3.62714	0.270119	0.168278	0.13111	0.0272139	0.224284	0.140757	3.4911	3.56935	3.41055	3.77363	3.76729	3.69825	0.188024	0.159894	0.248918	0.121165	0.126106	0.102905	4.2132	4.2377	4.33216	4.45945	4.37566	4.41942	0.0902286	0.0836531	0.0713362	0.0380799	0.0791375	0.0896741	4.26161	4.24588	4.37579	4.40813	4.38888	4.41705	0.0819798	0.101191	0.0614353	0.0649544	0.0657701	0.0833485
pol_pos_4246	4.34004	4.11959	4.28751	3.98831	4.21737	4.25074	0.0680649	0.0755491	0.101673	0.0997072	0.14831	0.0704287	3.96601	4.20979	4.01376	4.21855	4.21832	4.25319	0.117556	0.123922	0.047277	0.0826937	0.0900612	0.103062	4.44014	4.36292	4.72582	4.3565	4.40624	4.76925	0.0793336	0.079613	0.0522289	0.0615959	0.103821	0.101272	4.47003	4.58868	4.58511	4.57372	4.58404	4.63905	0.0880871	0.111395	0.109028	0.117591	0.101577	0.128505
pol_pos_4266	5.12372	5.17964	5.18323	5.24183	5.15556	5.19034	0.0375372	0.0354486	0.0419763	0.0410511	0.0429681	0.0412605	5.18178	5.1642	5.18014	5.21395	5.21605	5.1663	0.0419898	0.0383338	0.0458218	0.0366296	0.0328263	0.03375	5.1919	5.17234	5.21466	5.22253	5.18894	5.21498	0.0427003	0.0359463	0.0365489	0.0445868	0.036545	0.0339867	5.19132	5.16429	5.23083	5.21382	5.19843	5.20318	0.0409416	0.0391686	0.0394432	0.0369501	0.0374987	0.0383221
pol_pos_4312	4.29668	4.29983	4.41792	4.5094	4.35276	4.48823	0.0528689	0.0918466	0.0476541	0.0285382	0.0882995	0.0565197	4.28481	4.33358	4.48088	4.35243	4.51777	4.44637	0.0636682	0.0786052	0.0999512	0.0879844	0.0560402	0.0690648	3.89471	3.95489	4.00358	3.98703	4.05205	4.12852	0.0394385	0.0172549	0.0419731	0.0633194	0.0383627	0.0619316	3.86301	4.08396	3.93304	4.08038	4.02942	4.09441	0.0477319	0.0309951	0.0673961	0.0618522	0.0697256	0.07363
pol_pos_4383	5.42928	5.49766	5.51113	5.46424	5.41698	5.57228	0.0262012	0.0632621	0.0413679	0.0443288	0.0705024	0.0474109	5.60144	5.66413	5.55829	5.38436	5.56097	5.48426	0.0445104	0.0465579	0.0476031	0.0880374	0.0266232	0.03479	5.55702	5.53584	5.53595	5.53582	5.55685	5.60587	0.0445933	0.0293261	0.0252029	0.0612332	0.0271093	0.0327308	5.57918	5.61254	5.60782	5.53842	5.49089	5.53857	0.0353352	0.0358112	0.0381596	0.0204773	0.0232054	0.0212819
pol_pos_4388	3.43581	3.45411	3.18756	3.21064	3.7016	4.1712	0.0834155	0.12134	0.0972223	0.108199	0.050185	0.0871551	3.42406	3.14343	3.30819	3.04948	3.86187	3.89051	0.108896	0.142098	0.0714104	0.0687362	0.0756488	0.059683	4.10412	4.03129	3.98975	3.69063	4.28809	4.5704	0.0562591	0.0608487	0.0543251	0.272268	0.0761204	0.0647404	3.99507	4.09611	3.93534	3.97394	4.40554	4.50155	0.0795123	0.066138	0.0769825	0.0649438	0.0521233	0.0817213
pol_pos_4391	4.67187	4.79171	4.732	4.86102	4.76408	4.68617	0.0246881	0.0405107	0.0418377	0.031603	0.0622848	0.0522287	4.81938	4.82341	4.84523	4.79726	4.8422	4.67941	0.0174493	0.0283755	0.0372857	0.0599099	0.0285746	0.0195979	4.62703	4.65104	4.75202	4.73642	4.73962	4.75336	0.041137	0.0339536	0.0204569	0.0321695	0.0240225	0.0283445	4.73698	4.73305	4.72143	4.81226	4.79539	4.77776	0.0349237	0.0358114	0.0405356	0.0272787	0.0412609	0.0495136
pol_pos_440	NA	NA	NA	NA	NA	NA	NA	NA	NA	NA	NA	NA	NA	NA	NA	NA	NA	NA	NA	NA	NA	NA	NA	NA	4.70964	4.66834	4.79841	4.78495	4.69815	4.85095	0.0368656	0.0603244	0.0307536	0.0678975	0.022651	0.0322847	4.72286	4.82102	4.8019	4.80922	4.77123	4.83041	0.0541498	0.0493406	0.0409868	0.0353678	0.0370682	0.0544293
pol_pos_4481	NA	NA	NA	NA	NA	NA	NA	NA	NA	NA	NA	NA	NA	NA	NA	NA	NA	NA	NA	NA	NA	NA	NA	NA	4.40491	4.40156	4.35525	4.7939	4.23628	4.23239	0.0805175	0.126616	0.144242	0.129723	0.0955466	0.122782	4.16219	4.05055	4.49269	4.43126	4.30209	4.2394	0.0793317	0.131733	0.19536	0.152849	0.162193	0.13554
pol_pos_4535	4.91274	4.99412	4.91774	4.95681	4.88057	4.87848	0.0241307	0.0340181	0.058846	0.0518379	0.0910236	0.0323672	5.0327	4.97424	5.03431	4.93341	5.15	5.05775	0.0842697	0.0485322	0.0764925	0.0649435	0.0584357	0.0631742	6.01623	5.97834	6.09746	6.09087	6.01918	6.13368	0.0413851	0.0542354	0.0265536	0.0483659	0.0259977	0.0360986	6.02418	6.10249	6.10323	6.11207	6.07469	6.11512	0.050444	0.0521409	0.0427459	0.0330686	0.036082	0.0513788
pol_pos_4547	4.8266	4.52729	4.79072	4.63972	4.63325	4.80615	0.0929566	0.060235	0.0884283	0.0891743	0.0621503	0.0503094	4.507	4.68609	4.64476	4.70844	4.4684	4.6885	0.149304	0.0800956	0.0737877	0.0663563	0.0537177	0.0702081	4.40955	4.28205	4.49872	4.1153	4.32989	4.5339	0.0721516	0.129946	0.0970212	0.10135	0.110873	0.0851848	4.39149	4.49806	4.55007	4.35115	4.41017	4.42803	0.131816	0.107806	0.0692816	0.125661	0.0815884	0.0936917
pol_pos_4550	3.87953	4.02626	4.06999	4.17946	4.20536	4.12596	0.0506634	0.0373984	0.051245	0.0305087	0.0820648	0.0555485	4.05453	4.04275	4.3034	4.28792	4.46821	4.24587	0.0913983	0.0700092	0.0422509	0.0738485	0.0607107	0.0689271	4.23954	4.29978	4.45439	4.49585	4.4919	4.60222	0.0586324	0.0334717	0.0277188	0.0588537	0.0211011	0.0330661	4.2588	4.38163	4.50304	4.62425	4.6278	4.63642	0.058828	0.0572075	0.0442335	0.0151997	0.0474568	0.0365895
pol_pos_4578	5.84993	5.8398	5.92838	5.98219	5.92114	6.0921	0.0264361	0.0417488	0.0237742	0.0200793	0.0406689	0.0428291	5.8534	5.86429	5.9728	5.99651	6.00706	6.08234	0.0607031	0.0497993	0.0619696	0.0355589	0.0435509	0.033811	4.83253	4.81602	5.19357	5.13874	5.15615	5.54915	0.0890277	0.0939063	0.0421125	0.120911	0.0543126	0.0282033	4.88787	4.98591	5.05531	5.16343	5.27329	5.60342	0.078994	0.0742579	0.101364	0.0514036	0.0761066	0.0502692
pol_pos_4582	4.26127	4.0573	4.33091	4.33251	4.23757	4.34225	0.149932	0.138456	0.07863	0.0774015	0.118175	0.110174	4.13811	4.28341	4.11971	4.30304	4.16535	4.25845	0.12382	0.10076	0.154285	0.126441	0.107926	0.135589	4.5747	4.51992	4.66741	4.59833	4.58353	4.71168	0.0972911	0.110339	0.0752055	0.0558267	0.0935322	0.110203	4.63212	4.63568	4.72456	4.64372	4.62011	4.63758	0.0828016	0.101286	0.106927	0.0956159	0.0955811	0.116145
pol_pos_4625	4.15583	4.15014	4.18135	4.27362	4.19929	4.26573	0.0436805	0.0457799	0.051086	0.0456661	0.0669162	0.0420613	4.14889	4.1545	4.28967	4.31807	4.34011	4.2939	0.0904169	0.0557984	0.0897371	0.0510459	0.044807	0.0572529	4.05655	3.9904	4.24041	4.23924	4.13321	4.37636	0.0382776	0.0374818	0.0483454	0.0561188	0.0553677	0.0721916	4.02967	4.15144	4.23754	4.29977	4.27311	4.3996	0.0852503	0.0813027	0.0728298	0.0596179	0.0739779	0.0957293
pol_pos_4650	5.07114	4.9001	5.18193	5.1924	5.14552	5.26488	0.0526076	0.116814	0.0406532	0.0138454	0.0532444	0.0488439	5.01719	5.11377	5.26993	5.1197	5.24238	5.22228	0.10379	0.045035	0.0919502	0.160264	0.0496543	0.0474217	4.80182	4.8002	5.01193	4.77568	4.95979	5.11371	0.0506936	0.0414903	0.0396906	0.12972	0.0316859	0.0409771	4.90445	4.97312	5.07645	5.09863	5.11596	5.13133	0.0270293	0.0454556	0.0269502	0.0315369	0.0422239	0.0451741
pol_pos_4668	4.32698	4.44194	4.27088	3.94592	4.41101	4.12288	0.0888459	0.0986336	0.0969649	0.0539686	0.0869869	0.100325	4.30451	4.3505	4.34333	4.07458	4.46412	4.08849	0.10153	0.102074	0.178457	0.0513022	0.0896552	0.0207143	4.34014	4.2524	4.24117	4.08782	4.27726	4.41312	0.0682601	0.0615709	0.0950653	0.106067	0.102609	0.0690152	4.3374	4.32235	4.40473	4.20557	4.45943	4.33144	0.0953197	0.094477	0.0423212	0.0821795	0.105154	0.107146
pol_pos_468	NA	5.30565	NA	NA	NA	NA	NA	0.143833	NA	NA	NA	NA	NA	3.61398	NA	NA	5.30302	4.52994	NA	0.0344723	NA	NA	0.0682087	0.198276	4.47582	3.86046	NA	4.19485	NA	4.28206	0.251677	0.500924	NA	0.648097	NA	0.281284	NA	NA	NA	NA	NA	5.2654	NA	NA	NA	NA	NA	0.0423325
pol_pos_4713	4.16544	4.17173	4.26546	4.44025	4.24032	4.25981	0.108405	0.0990581	0.0799021	0.0261941	0.11564	0.0882523	4.20763	4.15876	4.16957	4.33833	4.35336	4.27518	0.10054	0.110393	0.12669	0.0799841	0.0809058	0.0722531	4.70159	4.72558	4.79534	4.91395	4.84244	4.88469	0.085759	0.077738	0.0696796	0.038994	0.0772735	0.0863057	4.73472	4.73511	4.84873	4.86895	4.84666	4.87407	0.0796565	0.0912706	0.0598632	0.0603905	0.0647431	0.0763645
pol_pos_4745	4.54342	4.66111	4.61106	4.72989	4.63837	4.56067	0.0251959	0.0456728	0.0448045	0.0317402	0.0591349	0.0455813	4.69633	4.69084	4.71389	4.66248	4.72269	4.56233	0.0199506	0.0316254	0.0349131	0.0676698	0.0309958	0.0165014	4.49936	4.51753	4.61854	4.61316	4.61801	4.62443	0.0444039	0.0410478	0.0231454	0.0381113	0.0232762	0.0339732	4.59914	4.60028	4.60241	4.68566	4.66035	4.66161	0.0301245	0.0391064	0.0422563	0.0302998	0.0384212	0.0463405
pol_pos_4753	4.11819	4.16707	4.02352	3.92624	3.90318	3.99763	0.0585971	0.0468237	0.0644099	0.0446971	0.116782	0.0750949	4.05124	4.1682	4.08	3.82497	4.09326	3.99797	0.0708481	0.073897	0.0645055	0.0786667	0.0596856	0.0775709	4.16578	4.14258	4.16112	4.10071	4.12722	4.18152	0.0484963	0.0595861	0.0526719	0.0845233	0.0762453	0.0610177	4.20668	4.33859	4.1489	4.09759	4.19872	4.20304	0.0641717	0.0566091	0.0786603	0.0607674	0.0818295	0.065746
pol_pos_4810	4.54894	4.65966	4.61184	4.73304	4.64099	4.57089	0.0292251	0.0432189	0.0422932	0.0364041	0.0624391	0.0494382	4.7004	4.69768	4.71654	4.67892	4.71637	4.5671	0.0187311	0.0313852	0.0366011	0.0675653	0.0287101	0.0208081	4.50346	4.52284	4.62807	4.61996	4.62352	4.63263	0.0442006	0.0368808	0.0223682	0.0375007	0.0191336	0.0325686	4.6021	4.60222	4.60631	4.6966	4.66867	4.66239	0.0338686	0.0436225	0.0414307	0.0329364	0.0414617	0.0472264
pol_pos_483	NA	NA	NA	NA	NA	NA	NA	NA	NA	NA	NA	NA	NA	NA	NA	NA	NA	NA	NA	NA	NA	NA	NA	NA	4.70082	4.65366	4.78265	4.77684	4.69751	4.82298	0.0479292	0.0688212	0.0324722	0.0722976	0.0288828	0.0425961	4.70765	4.79267	4.79414	4.79455	4.75491	4.8099	0.0624687	0.054579	0.0348846	0.0469395	0.0354815	0.0434469
pol_pos_4835	4.65934	4.64815	4.52372	4.32668	4.57255	4.65687	0.0305504	0.0391237	0.0273565	0.036344	0.0564307	0.0251766	4.61953	4.70986	4.59646	4.2321	4.68315	4.51043	0.0378392	0.0423608	0.0232634	0.0548608	0.0385318	0.0343711	4.73609	4.65342	4.63483	4.34919	4.6739	4.74248	0.0255661	0.0238883	0.0318963	0.0624143	0.0377479	0.0204653	4.70406	4.77797	4.68848	4.48262	4.74671	4.71901	0.043036	0.0391335	0.0207608	0.061387	0.0429376	0.0430234
pol_pos_4838	NA	NA	NA	NA	NA	3.75186	NA	NA	NA	NA	NA	0.0635122	NA	NA	3.87482	3.85673	4.00554	4.01112	NA	NA	0.0241862	0.0235557	0.0986829	0.0217282	4.37488	4.34518	4.43638	4.36649	4.38175	4.80082	0.0546455	0.0338009	0.0456636	0.0963123	0.0588771	0.0569084	4.45984	4.42793	4.49662	4.46998	4.62522	5.19503	0.0534634	0.0841215	0.0500663	0.0547382	0.0647018	0.115013
pol_pos_4848	4.0601	3.99563	3.87834	4.69597	4.03539	3.8987	0.04503	0.154418	0.104375	0.0496439	0.125439	0.11008	4.06858	4.06252	3.83125	4.48447	4.09444	3.93961	0.0901308	0.0445779	0.0855676	0.0616518	0.0494005	0.0692626	4.56747	4.46965	4.37993	4.97943	4.47428	4.45043	0.0676565	0.0391162	0.0609014	0.0684185	0.037723	0.0566496	4.47244	4.46441	4.27866	4.88977	4.38388	4.382	0.0533098	0.0604855	0.0443873	0.0285933	0.0407575	0.033613
pol_pos_4875	5.88357	5.95065	5.91138	5.9461	5.82937	5.8086	0.0255715	0.0376482	0.0570111	0.0446376	0.0954795	0.0367361	6.00662	5.96087	6.00601	5.90224	6.07902	5.95817	0.0757711	0.0509434	0.0815365	0.0691428	0.0593181	0.0604913	6.72953	6.71144	6.78086	6.8096	6.74167	6.79341	0.0494387	0.0435272	0.031824	0.0261649	0.0318682	0.0369373	6.75561	6.7793	6.7983	6.81012	6.779	6.7886	0.0452686	0.0533212	0.0386225	0.0359925	0.0398215	0.0432048
pol_pos_488	4.15629	4.20574	4.31474	4.28016	4.32097	4.17523	0.0816684	0.0303083	0.0470719	0.029638	0.0421085	0.0431872	4.28139	4.29745	4.32141	4.37266	4.36039	4.13041	0.0793832	0.0600564	0.0677717	0.0337218	0.0606321	0.0450581	4.13903	4.36333	4.27934	4.51284	4.44997	4.14889	0.0496327	0.0246553	0.0202677	0.0217045	0.0509124	0.0362104	4.23707	4.26351	4.4434	4.47769	4.30406	4.02958	0.0248399	0.0438448	0.0387692	0.029299	0.0445676	0.0527347
pol_pos_4906	4.92374	4.8468	4.90083	4.89506	4.86467	4.90235	0.0229073	0.0424239	0.055718	0.0167887	0.0747857	0.057003	4.89806	4.87906	4.91029	4.85798	5.03535	4.87907	0.0486252	0.0530193	0.0603011	0.0589342	0.0500389	0.0869529	4.50938	4.45191	4.57432	4.59652	4.49788	4.56982	0.0899526	0.0398687	0.0695922	0.0633043	0.0624441	0.0484994	4.51543	4.60161	4.62231	4.59683	4.58874	4.57321	0.0659648	0.0728336	0.0592085	0.0429186	0.0686442	0.0902309
pol_pos_4922	4.25759	4.28902	4.17345	4.24098	4.05621	4.25255	0.081864	0.0987377	0.105416	0.0480904	0.170387	0.0660056	4.13834	3.87138	4.13846	4.26504	4.37241	4.39358	0.117809	0.13036	0.160713	0.0712598	0.0940786	0.0727805	3.75424	3.54321	3.69216	3.80079	3.72693	3.96256	0.0674516	0.0291814	0.0669246	0.136775	0.0338875	0.101014	3.86176	3.62183	3.61922	3.69324	3.98049	4.17993	0.119095	0.0151979	0.0247567	0.0344585	0.0584738	0.125712
pol_pos_4923	4.39771	4.01509	3.73378	3.72405	3.68336	4.56418	0.0828394	0.112535	0.148155	0.0716077	0.0992267	0.054218	4.3105	3.88064	3.45051	3.41973	3.73117	4.44516	0.101839	0.125226	0.406569	0.101338	0.120126	0.0557449	4.5863	4.31975	4.15229	3.93707	4.03254	4.62003	0.0671109	0.0520034	0.105573	0.0920907	0.0901341	0.0753637	4.53218	4.20501	4.0796	3.71563	4.09113	4.54384	0.0948199	0.148477	0.129368	0.0981306	0.0988347	0.0563056
pol_pos_4934	4.39508	4.04739	4.29445	4.01968	4.05041	4.08074	0.0848791	0.072724	0.111136	0.119705	0.127508	0.0467791	4.01933	4.11005	4.09184	4.43606	4.40375	4.19891	0.117369	0.0712937	0.137877	0.172585	0.126755	0.0771023	5.29136	5.28411	5.26669	5.47136	5.11795	5.14235	0.073558	0.0856998	0.116642	0.177291	0.092853	0.101364	4.9783	4.91651	5.27311	5.25854	5.23421	5.19271	0.120726	0.10135	0.188927	0.137327	0.134447	0.113273
pol_pos_4940	4.2845	4.30194	4.37743	4.40541	4.25144	4.41209	0.0656172	0.0517019	0.0592189	0.0254691	0.09902	0.0797313	4.29786	4.34004	4.43572	4.37856	4.5325	4.37085	0.0790417	0.0843798	0.112718	0.0638702	0.0653319	0.0820429	3.95599	3.95455	4.17261	4.16624	4.05629	4.20656	0.0835107	0.0702326	0.0638773	0.052518	0.0898582	0.0678966	4.01822	4.07315	4.17685	4.18724	4.17498	4.15399	0.0905008	0.0978909	0.0927852	0.0688977	0.081001	0.0960448
pol_pos_4942	4.61995	4.63521	4.60106	4.68772	4.63384	4.59173	0.0178399	0.0212301	0.0201853	0.020852	0.0261811	0.0162956	4.63013	4.58686	4.57689	4.60824	4.60819	4.63337	0.0130593	0.0141259	0.0267332	0.0143608	0.0127555	0.019913	4.63684	4.58973	4.67214	4.61398	4.6139	4.65391	0.0217677	0.0152478	0.0146207	0.0145163	0.0210389	0.0169325	4.61413	4.62049	4.62375	4.6512	4.66443	4.68993	0.0248877	0.0388756	0.0130368	0.0289903	0.020965	0.0202759
pol_pos_5001	4.10271	4.09207	4.09094	4.23011	3.92265	4.22343	0.121801	0.122757	0.130906	0.0377675	0.181953	0.141074	3.99759	3.98914	4.24505	4.08941	4.31637	4.19313	0.165482	0.147258	0.170058	0.152695	0.133867	0.141041	3.82477	3.7954	3.9194	3.56763	3.88545	4.03951	0.0980323	0.0650291	0.110476	0.257994	0.057111	0.150479	3.93286	4.04691	3.90035	3.83792	4.01266	4.09476	0.084704	0.0589791	0.114335	0.120839	0.100368	0.116068
pol_pos_5021	4.4663	4.42216	4.48592	4.59771	4.45747	4.45939	0.0634886	0.0923714	0.0733392	0.028887	0.0716763	0.0818187	4.46087	4.4371	4.43419	4.5019	4.45153	4.45651	0.0718515	0.0899756	0.0968495	0.0709013	0.0713804	0.0824291	4.48811	4.40247	4.49732	4.54297	4.48392	4.48291	0.0662519	0.0923655	0.0703783	0.0634228	0.0720064	0.0828325	4.42351	4.44983	4.53248	4.50562	4.46223	4.46304	0.0825511	0.109849	0.0651476	0.0703424	0.064303	0.0762116
pol_pos_5088	3.87296	3.77295	3.77947	3.74039	3.86081	3.94082	0.146743	0.0347763	0.101585	0.0188104	0.114166	0.0646994	3.62348	4.13582	3.70319	3.93294	3.76783	3.97432	0.0292518	0.0968356	0.109051	0.0842474	0.0769152	0.0893021	4.19584	4.12821	4.32371	4.2268	4.17161	4.45149	0.124431	0.132119	0.0957241	0.0642268	0.119129	0.100603	4.24471	4.26397	4.31537	4.30263	4.21666	4.31181	0.0992164	0.114579	0.164526	0.110074	0.112834	0.150153
pol_pos_5090	NA	NA	NA	NA	NA	NA	NA	NA	NA	NA	NA	NA	NA	NA	NA	NA	NA	NA	NA	NA	NA	NA	NA	NA	4.25565	4.0659	4.50165	4.48575	4.29356	4.83213	0.0872297	0.0960734	0.0957681	0.20912	0.00739057	0.0846868	4.48897	4.50292	4.21432	4.21403	4.17458	4.92824	0.129945	0.0651379	0.154073	0.086413	0.146648	0.0741038
pol_pos_5113	NA	NA	NA	NA	NA	NA	NA	NA	NA	NA	NA	NA	NA	NA	NA	NA	NA	NA	NA	NA	NA	NA	NA	NA	4.62336	4.35127	4.91408	4.64717	4.0913	4.84401	0.0538115	0.103649	0.0936701	0.160504	0.137682	0.0749696	4.81979	4.89917	4.63928	4.69357	4.32878	4.80689	0.126985	0.0658861	0.141624	0.0247425	0.122921	0.065124
pol_pos_5194	6.08773	6.14705	6.02328	5.99485	6.06212	6.09018	0.0334437	0.0412103	0.044716	0.0185257	0.0579088	0.0373845	6.0461	6.03878	6.1392	6.01984	6.24412	6.0278	0.0587545	0.0473635	0.0902871	0.0751779	0.0636029	0.0310362	6.0003	5.93514	6.01802	5.98265	6.00335	6.16011	0.0315845	0.0353301	0.0439468	0.0799194	0.0551462	0.0477383	6.03944	6.02479	6.05097	5.95452	6.15748	6.13077	0.0545089	0.0417694	0.0545917	0.0545023	0.055797	0.0600401
pol_pos_5201	4.54248	4.5728	4.56583	4.58734	4.56221	4.52104	0.0447597	0.0232444	0.0273469	0.0229324	0.0200893	0.0222904	4.53866	4.57722	4.49026	4.59962	4.56782	4.56299	0.0207147	0.026988	0.107599	0.0265576	0.0241038	0.020603	4.54759	4.55429	4.49364	4.57707	4.58622	4.5479	0.0235086	0.0268006	0.0817568	0.0318607	0.0240985	0.0275359	4.51327	4.63831	4.52044	4.57007	4.54996	4.58213	0.0269921	0.0789261	0.0544886	0.0247346	0.0211229	0.0151655
pol_pos_5236	4.51547	4.48345	4.4998	4.5043	4.45412	4.44553	0.0421991	0.037938	0.0258815	0.0302296	0.0383556	0.0316532	4.52391	4.46161	4.46039	4.48202	4.47939	4.46971	0.0343344	0.0367412	0.0259291	0.031704	0.0290533	0.0368335	4.53526	4.44998	4.48302	4.50189	4.45182	4.45112	0.0436502	0.0442237	0.0318875	0.0339215	0.0350396	0.0324972	4.50113	4.51003	4.46422	4.48316	4.44288	4.44533	0.0345554	0.0652085	0.024219	0.0345355	0.031523	0.0367308
pol_pos_5325	4.11474	4.21067	4.08566	4.14223	4.20416	4.40409	0.0274225	0.0428652	0.0526517	0.0515941	0.0313166	0.037018	3.96423	4.15863	4.23475	4.06965	4.36465	4.32366	0.0572179	0.0409565	0.0634948	0.0532031	0.0320136	0.0422613	3.82246	3.83858	3.88186	3.86965	4.0131	4.30866	0.0445615	0.0520037	0.0267308	0.0439926	0.0446771	0.0270386	3.85757	4.01732	3.89728	3.96077	4.13844	4.3017	0.0707083	0.0395726	0.0325246	0.0578058	0.0390322	0.067261
pol_pos_5348	4.71009	4.60406	4.54645	4.59161	4.46987	4.70065	0.043419	0.0564433	0.107055	0.0995137	0.0849362	0.0584282	4.63199	4.48919	4.63964	4.41157	4.55252	4.71482	0.0807989	0.104148	0.0868093	0.139196	0.0963081	0.0785391	4.67707	4.55591	4.54546	4.2659	4.2674	4.70047	0.0602032	0.0540394	0.0894272	0.0879183	0.0957949	0.0685398	4.58811	4.51963	4.48638	4.20193	4.41925	4.92945	0.0672239	0.069687	0.0836995	0.079283	0.071265	0.0844522
pol_pos_5366	4.40205	4.28341	4.32847	4.50247	4.32523	4.46054	0.0808658	0.0823593	0.0415121	0.0374631	0.0948282	0.0360808	4.49381	4.61606	4.5973	4.64127	4.61701	4.57915	0.0741596	0.0490149	0.0666521	0.0564752	0.0313914	0.0595718	4.36697	4.1992	4.42389	4.40473	4.42736	4.52809	0.0793779	0.0673829	0.0465463	0.0526585	0.0827114	0.0760282	4.64431	4.58661	4.719	4.82366	4.6797	4.64447	0.0573279	0.0422399	0.0582702	0.0610956	0.0581428	0.0883299
pol_pos_5383	3.67497	3.82345	3.77003	3.95193	3.91804	3.99338	0.14416	0.0996951	0.124836	0.0808842	0.130252	0.0699207	3.80397	3.78939	3.85534	4.01572	3.97651	4.15278	0.140309	0.0920967	0.0754233	0.0827296	0.083542	0.0819891	3.8146	3.65303	3.88417	3.95996	3.90849	4.26574	0.1256	0.175485	0.0866619	0.0974015	0.116132	0.0918457	3.90639	3.76401	3.96898	3.92449	4.10454	4.61802	0.123035	0.124491	0.0865294	0.037389	0.120961	0.0934788
pol_pos_5411	4.45021	4.41858	4.63113	4.57796	4.44682	4.44713	0.0957431	0.0961571	0.0913042	0.0292708	0.10807	0.0649139	4.47781	4.45211	4.56125	4.5564	4.45177	4.39754	0.122975	0.113492	0.1285	0.0727736	0.0845135	0.096025	4.42052	4.41532	4.59087	4.61748	4.49851	4.50088	0.100311	0.0802538	0.0832825	0.0391123	0.0950739	0.0935964	4.3947	4.50777	4.69714	4.57444	4.57146	4.61357	0.118368	0.11395	0.0949675	0.0730731	0.0980216	0.0995258
pol_pos_5419	4.54278	4.4615	4.45173	4.33513	4.61786	4.65276	0.133141	0.121198	0.080453	0.0922107	0.145578	0.0950799	4.53481	4.24671	4.50921	4.59098	4.98136	5.52506	0.242905	0.149876	0.106145	0.188135	0.0820489	0.0703348	NA	NA	NA	NA	NA	NA	NA	NA	NA	NA	NA	NA	NA	NA	NA	NA	NA	3.93771	NA	NA	NA	NA	NA	0.0443128
pol_pos_5468	4.1551	4.27601	4.21614	4.21568	4.12065	4.15115	0.118151	0.122623	0.149653	0.00707064	0.129402	0.162621	4.22645	4.2012	4.2017	4.31664	4.19008	4.35695	0.106626	0.139982	0.166541	0.139247	0.118738	0.144815	4.15067	4.20262	4.20192	4.22958	4.16691	4.34262	0.119953	0.138477	0.116652	0.145831	0.105236	0.147927	4.21593	4.4557	4.10133	4.14114	4.21519	4.51873	0.109824	0.107824	0.0934698	0.153151	0.115567	0.0820212
pol_pos_5545	4.71165	4.73929	4.55666	4.27201	4.65015	4.57303	0.0394481	0.05094	0.0448878	0.0204479	0.0680976	0.043681	4.69399	4.68212	4.75262	4.3385	4.78876	4.43852	0.0433891	0.0417614	0.0891276	0.0873125	0.0489408	0.0298799	4.02813	3.9901	4.11595	4.07819	4.12599	4.08901	0.0549682	0.0657045	0.0238812	0.0679343	0.034026	0.0734485	4.12266	4.12895	4.19405	3.91854	4.23436	4.17075	0.0893284	0.0625845	0.0379473	0.0795139	0.0861521	0.0809175
pol_pos_564	4.02267	4.10827	4.09326	4.20554	4.01211	3.9578	0.108987	0.0852341	0.135034	0.0771257	0.119868	0.130112	3.95407	4.106	4.20355	4.00085	4.15874	3.98294	0.146459	0.0978991	0.177235	0.1456	0.107379	0.111188	3.64622	3.82757	3.94245	3.8355	3.86359	3.91147	0.0845729	0.0484955	0.0987743	0.120748	0.0576892	0.099158	3.85553	3.81529	4.05538	3.7912	3.89409	4.05761	0.040101	0.0872225	0.0308807	0.0736136	0.106469	0.0892844
pol_pos_5682	4.26183	4.33915	4.35094	4.31918	4.23866	4.4316	0.0372706	0.0763651	0.0520019	0.0528088	0.082788	0.0578759	4.4726	4.54757	4.41501	4.17349	4.4273	4.3396	0.0484207	0.0560481	0.0567041	0.122328	0.0346285	0.0398406	4.4148	4.4016	4.39375	4.38842	4.41334	4.48089	0.0505849	0.0342225	0.0330413	0.0722848	0.0328145	0.0374308	4.44613	4.48146	4.50305	4.40312	4.32949	4.37451	0.0477576	0.0417318	0.0536059	0.0343861	0.0318823	0.0256025
pol_pos_5745	3.8277	4.02621	4.35897	4.16887	4.04542	3.9888	0.0529904	0.0834633	0.055753	0.06138	0.0503083	0.096632	3.8236	4.21891	4.51318	4.05328	4.07986	4.22373	0.144776	0.106813	0.0960534	0.10705	0.071023	0.0712517	3.60242	3.91976	4.44098	4.1193	3.78821	3.85595	0.024673	0.0823891	0.0601293	0.0948831	0.0870822	0.0866133	3.63543	4.26887	4.55361	4.24364	3.90713	4.43316	0.115237	0.123037	0.0739288	0.057044	0.104611	0.114541
pol_pos_5758	5.07036	4.9759	4.85754	4.595	4.68944	4.76949	0.0817384	0.108912	0.0979149	0.100339	0.0999172	0.0619381	4.95069	4.92711	4.97393	4.69012	4.95265	5.22432	0.0888952	0.0947028	0.080035	0.082265	0.0647162	0.0839979	4.9215	4.74964	4.8098	4.45045	4.53616	4.8963	0.0983158	0.143562	0.0738795	0.0937351	0.145486	0.0586527	4.97792	4.91535	4.74682	4.72448	4.89835	5.1793	0.113181	0.0885535	0.0853636	0.141862	0.0692003	0.152861
pol_pos_5822	4.441	4.38916	4.58409	4.24801	4.35316	4.5742	0.0615452	0.106197	0.0606984	0.0490725	0.0999558	0.0516415	4.51873	4.4535	4.51808	4.44446	4.69725	4.55594	0.10369	0.081829	0.0813281	0.0877564	0.09314	0.0908548	3.19559	3.23943	3.75633	3.54269	3.53301	3.80562	0.0530303	0.164892	0.129756	0.110731	0.203542	0.0922256	3.23678	3.85766	3.97417	3.70494	3.65169	3.44416	0.232573	0.0222283	0.0898183	0.133397	0.246438	0.13031
pol_pos_5824	4.18973	4.21722	4.24828	4.26822	4.27915	4.39561	0.0329894	0.05669	0.055083	0.0568237	0.0679244	0.0608033	4.15355	4.21033	4.37895	4.25788	4.48791	4.32719	0.0756708	0.053004	0.0985111	0.0654062	0.0484311	0.0385558	3.89999	3.82905	4.06302	4.0017	4.00618	4.18935	0.0605628	0.0729975	0.0308281	0.023651	0.0842384	0.0675826	3.771	4.08682	4.08393	3.94536	4.12194	4.17271	0.170377	0.0392084	0.0655151	0.154093	0.060942	0.0764898
pol_pos_5825	NA	NA	NA	NA	NA	NA	NA	NA	NA	NA	NA	NA	NA	NA	NA	NA	NA	NA	NA	NA	NA	NA	NA	NA	4.35893	4.31459	4.44034	4.45167	4.38351	4.47585	0.0773008	0.076873	0.0539492	0.0567285	0.0663608	0.0601089	4.40848	4.41668	4.47901	4.43238	4.43663	4.45851	0.0721746	0.074702	0.056333	0.0523219	0.0610473	0.0579024
pol_pos_5833	3.89821	3.85584	3.9744	4.01487	3.78967	4.12622	0.135546	0.137394	0.168217	0.156205	0.185723	0.11695	3.99038	3.92618	3.89077	4.00918	3.87513	4.10434	0.172834	0.11137	0.142794	0.111255	0.207802	0.137909	3.92512	3.88709	3.80719	3.75138	4.12552	4.13163	0.157214	0.137199	0.170744	0.139281	0.0724865	0.133285	3.86117	3.86786	3.93251	3.70001	3.83714	4.33713	0.184708	0.157466	0.179412	0.141255	0.149418	0.128656
pol_pos_5847	4.60701	4.5769	4.66497	4.79126	4.67049	4.6948	0.108109	0.108238	0.105849	0.0674496	0.114474	0.112679	4.5948	4.58613	4.56662	4.66109	4.69383	4.70933	0.108768	0.10622	0.112605	0.102552	0.108853	0.120852	4.59539	4.58642	4.67259	4.73487	4.6901	4.72009	0.10291	0.100912	0.104906	0.101877	0.116692	0.111118	4.6003	4.64443	4.7085	4.68737	4.68842	4.71532	0.101268	0.116702	0.103789	0.104094	0.119584	0.116176
pol_pos_5861	4.81287	4.75841	4.76009	4.51644	4.62172	4.69146	0.0354636	0.0565073	0.0673809	0.0273959	0.0587992	0.0377869	4.69064	4.79892	4.73588	4.45009	4.7002	4.58264	0.0531432	0.0562018	0.0801328	0.0716404	0.0476712	0.0581674	4.72852	4.67219	4.80011	4.57938	4.65444	4.84023	0.032769	0.0429592	0.0410836	0.057509	0.047854	0.0433033	4.82257	4.88436	4.84431	4.72027	4.81703	4.89286	0.0491666	0.0705111	0.0492675	0.0388164	0.0588657	0.0740641
pol_pos_5905	4.40459	4.33526	4.38436	4.50114	4.37668	4.35893	0.0715396	0.0629252	0.0617224	0.00876421	0.0631407	0.0747427	4.38839	4.35762	4.32042	4.43756	4.35142	4.37668	0.0636333	0.0766902	0.0961419	0.0576513	0.0461451	0.0617027	4.39763	4.30612	4.37549	4.44654	4.37222	4.41328	0.075194	0.0751589	0.0565958	0.0483134	0.0586009	0.0727783	4.37028	4.38378	4.44459	4.43351	4.37384	4.39573	0.0735806	0.0748652	0.0541902	0.0565302	0.0636637	0.0606478
pol_pos_5932	4.1867	4.08045	4.16638	4.48955	4.15137	4.18419	0.185321	0.252177	0.251876	0.133731	0.298194	0.302263	4.22964	3.89712	3.92449	4.09434	4.18525	4.1918	0.202418	0.283313	0.298292	0.275764	0.25307	0.291619	4.23251	4.07632	4.1611	4.26984	4.15547	4.23672	0.197684	0.228193	0.263089	0.242335	0.278027	0.272769	4.27028	3.98572	4.34879	4.10273	4.16619	4.14969	0.213533	0.282041	0.178714	0.275687	0.277518	0.321211
pol_pos_6021	4.37976	4.23199	4.47059	4.44244	4.43512	4.46713	0.0760691	0.127886	0.0782895	0.0821476	0.0879205	0.0689984	4.45038	4.35625	4.35564	4.42611	4.42501	4.36852	0.077617	0.0980437	0.0921825	0.0918585	0.0715169	0.101177	4.70848	4.62506	4.77596	4.70741	4.77416	4.84072	0.0782575	0.05771	0.0500436	0.0912287	0.0785151	0.0709406	4.72721	4.73321	4.81118	4.78052	4.85013	4.83459	0.0851755	0.0740486	0.0697125	0.058781	0.0671575	0.0760383
pol_pos_6026	4.06561	4.08374	4.14893	4.43554	4.47047	4.59761	0.0374079	0.0185276	0.0337839	0.0554841	0.0951591	0.0574655	4.22857	4.2529	4.57854	4.5435	4.81029	4.75694	0.102207	0.0530569	0.0471229	0.0652685	0.0436817	0.0539311	4.23831	4.08716	4.43493	4.57798	4.68428	4.89795	0.0282783	0.064918	0.0720648	0.0693557	0.0683056	0.0621228	4.33307	4.51684	4.80099	4.97694	4.94398	5.02939	0.0865021	0.0842814	0.0636389	0.077097	0.0552796	0.0877642
pol_pos_6076	5.61798	5.63442	5.61208	5.31151	5.36071	5.67969	0.0208891	0.106418	0.0696546	0.0706124	0.0607352	0.0486667	5.51667	5.49903	5.75383	5.39507	5.69469	5.58815	0.0697981	0.0529636	0.0659382	0.070365	0.0518573	0.0606437	5.54252	5.39449	5.56234	5.52283	5.40175	5.71287	0.0520283	0.0360601	0.0468458	0.117043	0.0570111	0.0709415	5.53361	5.56223	5.65281	5.46224	5.43238	5.60594	0.0473703	0.0556513	0.0411926	0.0555154	0.0421821	0.0964137
pol_pos_6102	5.40146	5.32454	5.31762	5.60757	5.48823	5.46732	0.10284	0.0993147	0.156681	0.0811941	0.0855327	0.127978	5.3495	5.25513	5.40162	5.38361	5.51618	5.39438	0.112531	0.159392	0.141885	0.133186	0.113135	0.127421	5.29808	5.17064	5.33807	5.4798	5.37593	5.30376	0.0911841	0.078834	0.0865744	0.126304	0.116914	0.113819	5.2273	5.27805	5.36291	5.38708	5.40113	5.37429	0.131431	0.107259	0.0948794	0.119861	0.115319	0.124315
pol_pos_6110	4.5042	4.12782	4.32119	4.18978	4.356	4.36809	0.094211	0.0798877	0.111209	0.0721645	0.14545	0.0757769	4.17265	4.06702	4.37505	4.27935	4.62997	4.36247	0.140585	0.103288	0.158762	0.119129	0.127938	0.0886212	NA	NA	NA	NA	NA	NA	NA	NA	NA	NA	NA	NA	NA	NA	NA	NA	NA	NA	NA	NA	NA	NA	NA	NA
pol_pos_6163	3.85706	3.55671	3.68305	3.98546	4.11079	4.46782	0.111236	0.201943	0.27338	0.127068	0.109645	0.112086	3.82334	3.74768	3.56074	3.96702	3.74037	4.12411	0.0794806	0.122306	0.189149	0.0439171	0.103337	0.095485	4.15865	4.05201	4.04321	4.18784	4.40334	4.47781	0.12852	0.100813	0.10842	0.123974	0.126353	0.0827694	4.00516	4.25164	4.08439	4.01305	4.33445	4.55572	0.103717	0.0694301	0.0778058	0.0980754	0.0894607	0.0842329
pol_pos_6214	4.09611	4.16196	4.10547	4.08865	4.08221	4.20286	0.0617251	0.0333672	0.0467003	0.0441733	0.0533985	0.0629668	4.17515	4.07369	4.24657	3.95681	4.3302	4.36909	0.0840197	0.0646431	0.0572349	0.0761642	0.0528333	0.0512356	4.5563	4.48595	4.58335	4.55361	4.48901	4.69983	0.0341793	0.0339336	0.0602841	0.086081	0.0415097	0.0376538	4.48656	4.56507	4.57964	4.49251	4.54319	4.69907	0.0333293	0.0454277	0.0453949	0.016652	0.0459339	0.0571792
pol_pos_6236	NA	NA	NA	NA	NA	NA	NA	NA	NA	NA	NA	NA	NA	NA	NA	NA	NA	NA	NA	NA	NA	NA	NA	NA	4.78299	4.82931	4.80782	4.73054	4.83121	4.8535	0.114625	0.075485	0.0695173	0.12029	0.0631928	0.1069	4.84685	4.89295	4.6929	4.81243	4.804	4.67285	0.0926824	0.0675384	0.0935031	0.0910739	0.0722963	0.0978971
pol_pos_6306	4.40493	4.38679	4.43443	4.56211	4.42254	4.42793	0.0661872	0.0928853	0.0767243	0.028288	0.0773163	0.0815407	4.41332	4.38791	4.40341	4.44917	4.40678	4.40586	0.0828824	0.0965614	0.101994	0.0749108	0.0755459	0.0787698	4.42098	4.36149	4.4578	4.50261	4.44108	4.43433	0.0738346	0.0933858	0.0757697	0.0720197	0.0775981	0.0860461	4.37189	4.40206	4.48708	4.45921	4.41692	4.41863	0.0848066	0.114491	0.0719489	0.0777521	0.0785517	0.0771575
pol_pos_634	5.10249	5.16685	5.09384	5.17894	5.07247	5.07326	0.0482465	0.0314502	0.0472925	0.0063332	0.077948	0.0442371	5.20099	5.10999	5.20003	5.10997	5.23927	5.16182	0.0529992	0.0394641	0.0553673	0.0500545	0.0359749	0.0382381	3.71002	3.73373	3.91853	3.56603	3.72114	3.8878	0.0808968	0.0455061	0.0581029	0.136076	0.0721983	0.0640174	3.87923	3.8303	3.84593	3.80532	3.82142	3.89001	0.0714106	0.112394	0.060918	0.0572731	0.0537143	0.13771
pol_pos_6340	4.48023	4.45245	4.50827	4.60006	4.51371	4.50553	0.0686579	0.0849642	0.0843212	0.0570619	0.0656567	0.0983923	4.49782	4.45327	4.50793	4.49362	4.51567	4.51201	0.0905909	0.094327	0.11501	0.088868	0.070996	0.0883261	4.19211	4.16268	4.15162	4.18537	4.18006	4.16035	0.0702307	0.0757176	0.0903692	0.103596	0.0775057	0.0776894	4.08845	4.18336	4.28148	4.16509	4.1834	4.15079	0.0934993	0.100448	0.0638958	0.0887752	0.074196	0.0920383
pol_pos_6443	NA	NA	NA	NA	NA	NA	NA	NA	NA	NA	NA	NA	NA	NA	NA	NA	NA	NA	NA	NA	NA	NA	NA	NA	4.51531	4.52282	4.62314	4.58006	4.56939	4.72566	0.0867265	0.0338734	0.0552972	0.0737605	0.0752623	0.0478944	4.59987	4.58522	4.61826	4.62469	4.67639	4.84501	0.0777977	0.0991151	0.065327	0.0727158	0.0665801	0.0570351
pol_pos_6498	5.24378	5.22483	5.26814	5.3046	5.20902	5.2553	0.0428025	0.0484624	0.0421407	0.0166266	0.0547788	0.0336285	5.18494	5.24181	5.29137	5.22938	5.27907	5.16847	0.0531275	0.0489375	0.0714013	0.0535315	0.0505379	0.0449072	5.20329	5.18736	5.31821	5.20055	5.21299	5.29881	0.0414728	0.0306577	0.0397651	0.0683713	0.0448871	0.0420153	5.17504	5.23141	5.3114	5.27064	5.278	5.2499	0.0408957	0.0585759	0.0608481	0.0487587	0.06161	0.0543642
pol_pos_6582	4.35042	4.38242	4.44744	4.50661	4.42587	4.534	0.053699	0.0414357	0.0271207	0.043202	0.0675357	0.0336876	4.35107	4.42107	4.51632	4.39517	4.57537	4.5098	0.0722087	0.0504299	0.0769871	0.0955567	0.0437634	0.0510394	4.33291	4.35591	4.53771	4.42131	4.41329	4.62055	0.0665053	0.0313374	0.0514339	0.0692316	0.0505025	0.0594764	4.44507	4.47684	4.50133	4.59026	4.60272	4.67506	0.0575668	0.0846478	0.046191	0.0407809	0.0644714	0.0829056
pol_pos_6655	5.64602	5.3065	5.63858	5.52829	5.51312	5.54212	0.0769775	0.142729	0.0650277	0.0321312	0.0643967	0.0224314	5.50887	5.43196	5.39292	5.51689	5.40722	5.54483	0.0437672	0.0616347	0.0568669	0.0574295	0.0377452	0.0818166	5.10025	5.07837	5.10147	5.07142	4.99874	5.02518	0.0485543	0.0468485	0.0506868	0.0763471	0.0636806	0.046171	5.02966	4.98638	5.06941	4.9691	5.05446	5.23838	0.0635598	0.0425607	0.0720953	0.0622498	0.0595022	0.0698121
pol_pos_6746	5.01406	5.04851	5.10924	5.17547	5.13275	5.20377	0.0234991	0.0325326	0.0193697	0.0104414	0.0453051	0.0210356	5.04454	5.08408	5.20253	5.15735	5.27434	5.14056	0.0380086	0.0375712	0.0481399	0.0534257	0.0335246	0.0360753	4.51593	4.59953	4.77531	4.80129	4.80711	4.91629	0.0645812	0.0512337	0.0354508	0.064168	0.0377629	0.0492131	4.62612	4.73519	4.77114	4.85721	4.8241	4.80672	0.0449895	0.0742753	0.0410618	0.0357972	0.0384678	0.054061
pol_pos_681	4.90233	5.00526	4.91722	4.90779	4.88905	4.93828	0.0468305	0.0255297	0.0520302	0.0519531	0.0938987	0.0534409	4.90085	4.8668	5.08509	5.07544	5.37881	6.015	0.0949429	0.0651597	0.070919	0.0817048	0.0531194	0.0556662	5.417	5.44352	5.58627	5.57674	5.53981	5.71785	0.0649462	0.0527658	0.0523904	0.071065	0.0755172	0.0471166	5.5652	5.57616	5.62357	5.66877	5.80465	6.30648	0.0666176	0.0940507	0.0700848	0.0554769	0.0736035	0.0872773
pol_pos_6841	4.42839	4.44168	4.44561	4.58751	4.49296	4.46697	0.131743	0.0884654	0.12114	0.0656167	0.159875	0.0992172	4.39025	4.07245	4.27081	4.70896	4.74488	4.5818	0.13458	0.13825	0.179128	0.113948	0.134645	0.0642904	3.96828	3.86743	3.89055	4.37223	4.03787	4.16836	0.128604	0.105882	0.161745	0.0710601	0.128724	0.167049	4.15372	3.87018	4.04977	4.10189	4.18596	4.32532	0.0805115	0.168609	0.0933602	0.106087	0.138093	0.137805
pol_pos_7009	NA	NA	NA	NA	NA	NA	NA	NA	NA	NA	NA	NA	NA	NA	NA	NA	3.79586	3.96468	NA	NA	NA	NA	0.0749399	0.0719689	4.1812	4.20556	4.33466	4.30413	4.32203	4.57008	0.0345897	0.0345383	0.0201614	0.0853695	0.0525945	0.0385898	4.34181	4.36408	4.43747	4.59042	4.63352	4.86329	0.0351623	0.0688269	0.0467163	0.0209489	0.0490012	0.0545548
pol_pos_7034	4.15396	4.25605	4.30909	4.33047	4.24086	4.12099	0.0309509	0.0340977	0.0320814	0.0209577	0.0584675	0.0319204	4.16371	4.26947	4.37567	4.25336	4.29208	4.09213	0.052621	0.0431414	0.0656905	0.046646	0.0357201	0.0364453	4.116	4.21011	4.40819	4.25107	4.28047	4.33926	0.0404711	0.0325804	0.0377367	0.0726189	0.0352032	0.0315861	4.19899	4.29411	4.37626	4.37023	4.36872	4.3838	0.0507652	0.0617846	0.0317902	0.0269202	0.0411601	0.057747
pol_pos_7041	4.21487	4.19099	4.15508	4.32211	4.11812	4.25324	0.0976745	0.0449905	0.0474411	0.054496	0.10497	0.0506876	4.27486	4.41843	4.43115	4.46411	4.43655	4.385	0.0965639	0.0590118	0.0916182	0.0506317	0.0468226	0.0600778	4.10693	3.99751	4.17969	4.14982	4.18442	4.31244	0.0937721	0.0685493	0.0657633	0.0644706	0.0747933	0.0710468	4.41874	4.41003	4.48568	4.60163	4.44415	4.41464	0.0685046	0.0554954	0.0527334	0.0572878	0.0803729	0.0619667
pol_pos_7054	4.63088	4.70271	4.73674	4.63713	4.53458	4.64769	0.0242132	0.0511723	0.0657041	0.0532412	0.0635759	0.0200846	4.69037	4.69401	4.70058	4.61124	4.72734	4.71423	0.0711173	0.0458413	0.0717708	0.0846641	0.0757025	0.049008	NA	NA	NA	NA	NA	NA	NA	NA	NA	NA	NA	NA	NA	NA	NA	NA	NA	NA	NA	NA	NA	NA	NA	NA
pol_pos_7059	4.27145	4.27877	4.3431	4.34849	4.32606	4.41342	0.0438297	0.0282567	0.0456579	0.0289767	0.0598127	0.0302812	4.20817	4.26798	4.37329	4.32024	4.44078	4.3313	0.0602912	0.0467002	0.0635596	0.0707672	0.0482898	0.0520968	4.1575	4.15511	4.37913	4.27504	4.27515	4.49244	0.038019	0.037728	0.0324119	0.0550034	0.0511539	0.0340897	4.20124	4.30355	4.31609	4.38966	4.37643	4.39617	0.044628	0.0621359	0.0329848	0.030814	0.0491391	0.0534394
pol_pos_7072	4.78586	4.49368	4.76152	4.65538	4.60694	4.67541	0.110252	0.0968429	0.0538694	0.061805	0.0503265	0.0472206	4.63379	4.69907	4.51832	4.72782	4.43631	4.56971	0.0848599	0.0720739	0.0811234	0.0779098	0.0579321	0.0531121	NA	NA	NA	NA	NA	NA	NA	NA	NA	NA	NA	NA	NA	NA	NA	NA	NA	NA	NA	NA	NA	NA	NA	NA
pol_pos_7097	5.16587	4.8264	5.22207	5.15833	5.10084	5.12878	0.113242	0.193702	0.101477	0.0585063	0.0880446	0.067895	5.06224	4.98971	4.96361	5.07962	4.98475	5.11972	0.0822383	0.101437	0.0938858	0.0946504	0.074204	0.123058	4.63242	4.59998	4.66348	4.64384	4.54994	4.58738	0.0980891	0.0820034	0.0918905	0.125089	0.0977984	0.0952547	4.56708	4.51156	4.66015	4.49955	4.60473	4.79109	0.108106	0.0838064	0.114556	0.115285	0.101477	0.104477
pol_pos_7158	4.19173	4.2377	4.30715	4.25904	4.26633	4.39181	0.0236381	0.0213352	0.0200945	0.0193962	0.0557655	0.0205224	4.18231	4.24046	4.36292	4.28831	4.42545	4.31168	0.0436278	0.0319818	0.043755	0.0376669	0.0252244	0.0372222	4.0677	4.13147	4.32338	4.25621	4.27977	4.42658	0.0447692	0.0351155	0.0269279	0.06526	0.0429425	0.0312288	4.15273	4.23918	4.29973	4.35703	4.34679	4.40364	0.0401358	0.0484428	0.0372157	0.0249312	0.0327945	0.0519139
pol_pos_7160	NA	3.74015	3.82316	3.84856	3.85469	3.81578	NA	0.0565761	0.080448	0.0248472	0.0675238	0.0273358	3.81969	3.68907	3.94147	3.83395	3.97705	3.82795	0.071198	0.0601466	0.101531	0.0922575	0.0699591	0.0880477	4.26465	4.2277	4.44848	4.42156	4.4227	4.5025	0.0459847	0.0250079	0.0436184	0.0251488	0.0300899	0.0418602	4.2789	4.31716	4.45942	4.47171	4.45769	4.43975	0.0642475	0.0423498	0.0341471	0.0273721	0.056469	0.0592065
pol_pos_7173	4.42105	4.15433	4.29158	3.98784	4.1845	4.27651	0.0454038	0.134032	0.0922045	0.0244676	0.100263	0.0618713	3.89916	3.79575	4.06446	4.15636	4.18441	4.05388	0.0743389	0.0718309	0.180579	0.0647564	0.101797	0.0956386	3.95076	NA	4.06858	3.991	3.81849	4.35577	0.013328	NA	0.0610159	0.0596465	0.0307607	0.0538595	4.06845	4.01018	3.90851	4.10064	4.20193	4.43598	0.100145	0.0401039	0.0445721	0.0466408	0.0512708	0.0882115
pol_pos_7192	5.78671	5.79124	5.79731	5.84034	5.78737	5.78005	0.0308215	0.0285578	0.0326183	0.00753042	0.037164	0.0197641	5.76747	5.77495	5.80227	5.78666	5.79442	5.71956	0.0236918	0.0280141	0.0459608	0.0596316	0.0284927	0.0256624	5.68875	5.69485	5.79135	5.74691	5.74641	5.81367	0.0285973	0.0342736	0.029991	0.0293628	0.0340738	0.0259627	5.75512	5.76824	5.7952	5.82068	5.80595	5.83842	0.0249423	0.0356767	0.0316993	0.0239022	0.0390652	0.0209698
pol_pos_7199	NA	NA	NA	NA	NA	NA	NA	NA	NA	NA	NA	NA	NA	NA	NA	NA	NA	NA	NA	NA	NA	NA	NA	NA	4.28283	4.29216	4.29753	4.38181	4.28745	4.30202	0.0638745	0.0699964	0.0520874	0.0765506	0.0548451	0.05696	4.24843	4.24138	4.33949	4.31576	4.30247	4.3153	0.0633437	0.0588251	0.0436451	0.0650566	0.0531178	0.0531697
pol_pos_7204	5.6238	5.55576	5.5338	5.41932	5.55417	5.6251	0.0476957	0.0377826	0.0394331	0.00760481	0.0427643	0.0374303	5.57436	5.5963	5.59268	5.41266	5.68245	5.51718	0.0412196	0.0442302	0.0562541	0.0380465	0.0427796	0.0433615	5.70654	5.61134	5.67186	5.53566	5.68368	5.76385	0.0401561	0.037897	0.0415679	0.0394434	0.0579305	0.0282064	5.75021	5.69056	5.73386	5.55812	5.76385	5.71033	0.0517201	0.0484792	0.0591433	0.0627323	0.0440142	0.0638436
pol_pos_7231	5.76059	5.72137	5.69461	5.73338	5.65041	5.60862	0.0290106	0.0307217	0.0534265	0.0605941	0.0425117	0.0310971	5.71212	5.73873	5.78474	5.61285	5.67583	5.55684	0.0532401	0.0342085	0.0598506	0.0695203	0.0323476	0.0524369	5.22937	5.17973	5.24438	5.07398	5.15186	5.05122	0.0489545	0.0573141	0.0524713	0.0975484	0.0554726	0.0539915	5.10044	5.21012	5.26777	5.17292	5.14992	5.03253	0.0678446	0.0625901	0.0561118	0.0766238	0.0607351	0.0707921
pol_pos_7254	4.38892	4.38464	4.24706	4.40809	4.281	4.54273	0.151182	0.152818	0.0831767	0.0401662	0.0552261	0.169606	4.37001	4.25218	4.26711	4.37289	4.30885	4.53563	0.0708062	0.0502187	0.0774954	0.0664058	0.0445846	0.15833	4.5437	4.45681	4.38121	4.34613	4.37629	4.48273	0.09669	0.0948376	0.110096	0.0961314	0.0854076	0.0920589	4.33459	4.44199	4.42881	4.45244	4.55853	4.53936	0.040372	0.0476324	0.101921	0.0566921	0.0734698	0.0537126
pol_pos_727	5.04354	4.96451	4.98335	4.82201	4.76613	4.61683	0.146813	0.0740076	0.0757415	0.107774	0.139286	0.0822571	4.97572	4.90405	4.74258	4.9948	4.91429	5.1055	0.165223	0.101735	0.123598	0.15025	0.0780143	0.162549	4.87895	4.60552	4.65359	4.78279	4.63191	4.8787	0.115945	0.111503	0.111275	0.117912	0.0988762	0.0736257	4.96003	4.81285	4.81741	4.76697	4.80601	5.26891	0.131957	0.0746866	0.0913101	0.0876585	0.0927173	0.140187
pol_pos_7418	4.25337	4.3553	4.23435	4.06165	4.24078	4.25556	0.116737	0.1313	0.116735	0.0868571	0.112805	0.154979	4.18623	4.35691	4.30042	4.30645	4.24586	4.27805	0.123957	0.131262	0.14478	0.147046	0.108104	0.149289	4.19713	4.3566	4.27472	4.22802	4.27627	4.28307	0.120099	0.125875	0.11587	0.14047	0.104963	0.148052	4.16032	4.42404	4.14154	4.30605	4.24566	4.28383	0.120196	0.143785	0.0787146	0.141806	0.122607	0.14157
pol_pos_7490	6.33266	6.38617	6.33656	6.43415	6.3218	6.31544	0.0492635	0.0366726	0.0550163	0.00616846	0.0804027	0.0497475	6.41128	6.33903	6.41808	6.35262	6.47091	6.39547	0.0579363	0.0496669	0.0661486	0.0506765	0.0478534	0.0377459	4.31685	4.23984	4.41186	4.35621	4.33358	4.49875	0.0922074	0.0895098	0.0609288	0.0776201	0.0861648	0.0822212	4.43312	4.37838	4.41894	4.33723	4.46861	4.56782	0.101149	0.090847	0.098436	0.0535586	0.0735034	0.081491
pol_pos_7524	4.47991	4.53537	4.72842	4.51399	4.6026	4.71375	0.0532129	0.0623341	0.0882935	0.146438	0.0916026	0.0728464	4.35228	4.19649	4.50679	4.2246	4.85994	4.7203	0.14822	0.0530836	0.184114	0.089772	0.0611868	0.0514694	4.78507	4.7719	4.61527	4.84294	4.83108	4.36847	0.0452928	0.054101	0.0932523	0.0862308	0.072562	0.119171	4.26992	4.1699	5.00068	4.19207	4.45521	4.21434	0.0583435	0.0210706	0.12063	0.0463706	0.142149	0.0527759
pol_pos_7533	NA	NA	NA	NA	NA	NA	NA	NA	NA	NA	NA	NA	NA	NA	NA	NA	NA	NA	NA	NA	NA	NA	NA	NA	4.71771	4.67237	4.8246	4.79716	4.79134	4.87324	0.0631795	0.0579772	0.0381013	0.0430934	0.0475911	0.0348719	4.78166	4.82183	4.84434	4.85036	4.82552	4.82792	0.0637537	0.0596482	0.044215	0.0399611	0.0422938	0.067084	#VALUE!
pol_pos_7543	4.29366	4.42701	4.4277	4.72177	4.57443	4.6438	0.151067	0.153471	0.164572	0.0518022	0.144805	0.122897	4.30559	4.3469	4.2846	4.45308	4.55389	4.59201	0.171081	0.166937	0.212206	0.15103	0.124687	0.137801	4.27928	4.3426	4.32742	4.60446	4.51063	4.74088	0.146349	0.176218	0.153717	0.0946129	0.135646	0.105066	4.22228	4.29002	4.40511	4.35879	4.5482	4.6704	0.168249	0.177771	0.145478	0.164581	0.132111	0.136094
pol_pos_7568	4.11307	4.14758	4.15326	4.37229	4.25995	4.24395	0.0899525	0.168108	0.150361	0.0850209	0.135411	0.163812	4.13233	4.2059	4.10776	4.34807	4.25024	4.33912	0.126196	0.14422	0.216367	0.0626126	0.165399	0.13242	NA	NA	3.98408	NA	NA	3.99474	NA	NA	0.0585052	NA	NA	0.0435854	NA	3.93143	4.01573	4.07764	4.0528	4.10978	NA	0.0554369	0.0819002	0.0151099	0.0618459	0.0207948
pol_pos_762	3.99472	4.41866	4.59807	4.51209	4.51398	4.22319	0.036235	0.0573825	0.0628318	0.0658216	0.0427337	0.110977	4.13321	4.57251	4.68356	4.36702	4.24021	4.38447	0.101851	0.0660558	0.0484172	0.0801405	0.0504827	0.0847642	3.93666	4.36411	4.51402	4.40287	4.18376	4.12681	0.0623118	0.0577584	0.0687697	0.0736945	0.0844325	0.0715234	4.07134	4.47985	4.53697	4.39553	4.10632	4.35222	0.061106	0.073581	0.0315992	0.0498667	0.0666473	0.0591459
pol_pos_7641	4.54619	4.59691	4.59048	4.63501	4.61654	4.67235	0.0346232	0.0405113	0.0381719	0.0469683	0.0489701	0.0280337	4.59481	4.60686	4.72203	4.60123	4.78173	4.67396	0.0298806	0.0274559	0.0392376	0.0473105	0.0319697	0.0433432	4.15729	4.1712	4.36035	4.28043	4.33529	4.43398	0.0499357	0.0370231	0.0450368	0.0671732	0.0430749	0.0245199	4.21907	4.30824	4.3318	4.32397	4.43856	4.49929	0.056456	0.0417723	0.0545625	0.0588708	0.040054	0.0646279
pol_pos_7682	4.64531	4.6221	4.61203	4.66749	4.56729	4.52048	0.0530321	0.0587461	0.0735079	0.1016	0.0667531	0.0535498	4.62871	4.65472	4.70093	4.49598	4.58858	4.45536	0.0837085	0.0562188	0.0850739	0.0967039	0.0513686	0.0861324	4.0439	4.06967	4.14921	3.95932	4.05672	3.77502	0.0808944	0.0592345	0.050839	0.0836618	0.0749353	0.0625178	4.01436	4.0742	4.19308	4.10751	4.00448	4.04159	0.0900663	0.098125	0.0225558	0.0407788	0.0880393	0.0351871
pol_pos_7689	5.36145	5.12531	5.342	5.24966	5.21488	5.283	0.0855893	0.0712372	0.0400954	0.0702929	0.0508755	0.0539297	5.18712	5.27797	5.14593	5.31619	5.10398	5.21912	0.0881737	0.0658505	0.0548245	0.0608646	0.0525357	0.0495895	NA	NA	NA	NA	NA	NA	NA	NA	NA	NA	NA	NA	NA	NA	NA	NA	NA	NA	NA	NA	NA	NA	NA	NA	#VALUE!
pol_pos_77	5.56034	5.58922	5.62557	5.63341	5.57272	5.60691	0.0392581	0.0425241	0.0549204	0.0108496	0.0557329	0.0452208	5.54602	5.55258	5.62973	5.58806	5.66733	5.62457	0.0555398	0.0474087	0.0805243	0.0585302	0.0530008	0.053672	5.42527	5.43857	5.55541	5.58959	5.50656	5.63055	0.0629559	0.0419141	0.0477398	0.0237665	0.0548794	0.0694937	5.49813	5.49866	5.57138	5.56183	5.56897	5.60167	0.0654633	0.0612002	0.0571922	0.0465791	0.0654176	0.0732258
pol_pos_7731	3.6936	3.91639	3.83711	3.85103	3.88618	3.94804	0.0545845	0.0548259	0.0647325	0.0395743	0.0557169	0.0465727	3.96092	3.8554	3.97508	3.91071	4.04106	3.88321	0.0495052	0.040295	0.0790484	0.0737187	0.0473595	0.073278	4.10475	4.02214	4.23802	4.18209	4.18874	4.33528	0.036928	0.0372445	0.0330031	0.0414405	0.0501188	0.0422231	4.18563	4.21211	4.19485	4.24834	4.26145	4.21385	0.0507357	0.0403961	0.0348165	0.0204418	0.0365417	0.0738976
pol_pos_7759	3.88395	3.88381	3.88455	4.17632	4.02237	4.20482	0.15342	0.157409	0.213327	0.141903	0.171672	0.121735	4.05203	3.9737	3.88283	4.01597	3.99437	4.15073	0.156272	0.143174	0.156222	0.137793	0.190671	0.142797	3.85142	3.78689	3.8204	4.11229	3.99427	4.1863	0.224135	0.200827	0.236204	0.123081	0.179113	0.130699	4.15558	3.82809	4.11957	3.97803	4.02518	4.19683	0.116243	0.181705	0.13064	0.141851	0.15654	0.132511
pol_pos_7802	5.58398	5.63754	5.57297	5.62897	5.51578	5.51459	0.0631376	0.0334862	0.0582331	0.0149049	0.084274	0.0399516	5.65637	5.54604	5.62287	5.56176	5.71137	5.73678	0.0705501	0.0387681	0.0638962	0.0550014	0.047558	0.0305014	5.35146	5.33819	5.40192	5.35628	5.29124	5.3715	0.0290279	0.0378233	0.0356217	0.0411638	0.0497862	0.0319839	5.30735	5.31268	5.35109	5.32023	5.36364	5.60994	0.0651014	0.0370582	0.0444715	0.0369051	0.0364688	0.0581045
pol_pos_7830	4.24888	4.44769	4.37882	4.43627	4.48569	4.57466	0.0325157	0.0341327	0.0666151	0.0506302	0.0391478	0.0346203	4.19428	4.38152	4.30393	4.34748	4.50721	4.54613	0.0764638	0.0512055	0.0538243	0.0545965	0.022177	0.030176	4.21825	4.34335	4.22732	4.40955	4.47476	4.58268	0.0193598	0.0401373	0.0593098	0.0659373	0.0307886	0.0319708	4.05527	4.25802	4.23535	4.29563	4.46132	4.5764	0.0428444	0.0529554	0.0461088	0.0316356	0.0240987	0.0313791
pol_pos_7863	NA	NA	NA	NA	NA	NA	NA	NA	NA	NA	NA	NA	NA	NA	NA	NA	NA	3.65415	NA	NA	NA	NA	NA	0.0545421	3.5924	3.68515	3.91924	3.96494	4.04914	4.29143	0.0192733	0.0361469	0.0731874	0.118698	0.0762575	0.0674455	3.85465	3.99518	4.16727	4.17603	4.1852	5.19351	0.0880082	0.10318	0.0339073	0.0604516	0.0682932	0.149499
pol_pos_7942	NA	NA	NA	NA	NA	NA	NA	NA	NA	NA	NA	NA	NA	NA	NA	NA	NA	NA	NA	NA	NA	NA	NA	NA	5.52635	5.49145	5.58099	5.58578	5.54027	5.61473	0.0561388	0.0590241	0.0428291	0.03533	0.0466083	0.0388272	5.56761	5.57108	5.61994	5.59152	5.57226	5.6014	0.0567981	0.0526375	0.0395195	0.0378712	0.0482366	0.0552696
pol_pos_7944	4.34673	4.31563	4.51448	4.49412	4.50364	4.58192	0.0727653	0.0774433	0.0643673	0.0669695	0.103279	0.0423401	4.30696	4.40649	4.43932	4.57956	4.37846	4.43847	0.104019	0.0938366	0.0482298	0.105633	0.0638324	0.117919	4.22409	4.15498	4.41965	4.38904	4.37154	4.49679	0.0987855	0.0975317	0.0619701	0.052924	0.0791257	0.0878664	4.43753	4.40616	4.50368	4.52179	4.51619	4.46428	0.078664	0.092822	0.0756398	0.074245	0.0634108	0.0917293
pol_pos_7968	4.71254	4.73423	4.75433	4.73802	4.80436	4.82928	0.0836743	0.0493173	0.0431283	0.07136	0.0566551	0.0337023	4.54584	4.69603	4.65403	4.77602	4.76092	4.78768	0.100475	0.0313981	0.0781634	0.0512493	0.0774072	0.0471524	4.21484	4.24523	4.43038	4.19844	4.31781	4.5244	0.0620527	0.0237158	0.0374198	0.0365364	0.0657055	0.0569648	4.28825	4.30412	4.36231	4.3806	4.52655	4.46593	0.0754255	0.0436843	0.0363851	0.0600494	0.0645815	0.0556806
pol_pos_7976	3.93709	3.9139	4.06231	4.011	3.99651	4.01227	0.0366353	0.0540135	0.0213065	0.0435588	0.0354949	0.0240849	3.95682	4.08409	4.16677	4.05852	4.07794	3.99325	0.038911	0.0306435	0.0517939	0.0345167	0.0231629	0.031812	4.28234	4.26836	4.25052	4.2256	4.24126	4.28584	0.0378271	0.027131	0.0377264	0.0326294	0.0362925	0.0306897	4.33796	4.31708	4.33967	4.29953	4.26909	4.26138	0.0308135	0.0585127	0.0629218	0.0337347	0.0298586	0.062425
pol_pos_8022	5.2046	5.19888	5.13037	5.18895	5.08139	5.15764	0.0386928	0.0303232	0.0223306	0.0215343	0.0709377	0.0285363	5.09255	5.05329	5.21584	5.2424	5.33123	5.17942	0.061747	0.0553307	0.0746719	0.0516845	0.0415575	0.0258178	4.99094	4.93345	5.01028	5.07416	4.9721	5.13641	0.0238706	0.040538	0.0404611	0.0605311	0.0369944	0.0246639	4.95651	4.97421	5.02497	5.0711	5.12318	5.19927	0.0472938	0.0330186	0.0405818	0.0315309	0.0460677	0.0560456
pol_pos_8040	3.8966	4.08959	3.99453	4.03589	3.97487	3.91196	0.0359878	0.0439945	0.0672213	0.0664527	0.0599793	0.0510984	4.08761	4.08113	4.15659	4.09354	4.12034	4.07968	0.0576292	0.0400917	0.0555759	0.0501949	0.0672269	0.0520847	4.15526	4.07581	4.15578	4.06179	4.10844	4.25133	0.0423189	0.0379232	0.0420195	0.0579446	0.0421943	0.0484793	4.20634	4.16633	4.14086	4.15139	4.20573	4.2906	0.0463723	0.0420352	0.0578172	0.0238474	0.0430313	0.0770883	0.258657
pol_pos_8052	5.60048	5.6473	5.69292	5.78425	5.68855	5.6977	0.0741364	0.068804	0.0725869	0.0695057	0.0739232	0.0760489	5.67783	5.64252	5.67708	5.70011	5.73516	5.68663	0.0825058	0.073108	0.080627	0.0789989	0.0664865	0.074262	5.67204	5.63693	5.71919	5.72495	5.69732	5.74371	0.0814722	0.061511	0.0702376	0.0783066	0.0716137	0.0755339	5.67458	5.63248	5.7823	5.71482	5.71345	5.71437	0.0777245	0.0708278	0.0637143	0.0749696	0.0711377	0.073013
pol_pos_8064	4.69861	4.71078	4.79597	4.79766	4.77375	4.94309	0.0334169	0.041622	0.021176	0.0416473	0.0419004	0.0229865	4.73211	4.73737	4.84161	4.75008	4.91054	4.87057	0.0715014	0.0332937	0.0385834	0.0454351	0.0249407	0.0293125	4.13535	4.21136	4.40516	4.34378	4.45088	4.67422	0.0447318	0.0317295	0.0293531	0.0293523	0.0526315	0.0340628	4.19847	4.33221	4.37401	4.52387	4.50868	4.58751	0.0293006	0.0490926	0.0399508	0.0309536	0.0237613	0.0494631
pol_pos_8117	5.08473	5.11763	5.2787	5.08728	5.18243	5.26834	0.0373715	0.0422693	0.073198	0.101952	0.0694465	0.0515703	4.98115	4.86333	5.08331	4.88033	5.38107	5.27736	0.107505	0.0553127	0.145351	0.0681777	0.0363517	0.0335074	5.325	5.3093	5.18111	5.3589	5.37162	4.99897	0.0447364	0.0365312	0.0658354	0.058061	0.0617261	0.0827161	4.90794	4.84275	5.49773	4.84489	5.05224	4.88946	0.0435103	0.0281402	0.105913	0.0357467	0.11702	0.0338975
pol_pos_8120	4.17956	4.2797	4.21293	4.26352	4.19531	4.09667	0.0340497	0.0478293	0.073513	0.0516782	0.106556	0.0454961	4.32864	4.29213	4.3368	4.18778	4.42482	4.27083	0.094172	0.0573038	0.0958383	0.0818287	0.0689624	0.0705658	5.16275	5.146	5.21215	5.24641	5.1681	5.22304	0.0507082	0.042403	0.0372131	0.0313706	0.0334586	0.0345052	5.18898	5.20316	5.2375	5.24258	5.20747	5.22083	0.050151	0.0566877	0.040885	0.0375846	0.0406361	0.0496866
pol_pos_8178	5.11546	5.03292	5.0758	5.06791	5.11928	5.10357	0.0763449	0.0602972	0.045837	0.0170779	0.0722456	0.0430268	5.1355	5.03263	5.11368	5.11595	5.17688	5.13231	0.109725	0.0400571	0.0515003	0.0759737	0.0411591	0.027811	5.04412	4.96459	5.11453	5.06487	5.06564	5.18574	0.0295993	0.0226002	0.0297882	0.0224651	0.0397296	0.0219444	5.05775	5.09224	5.11906	5.12306	5.14232	5.26	0.0393574	0.0332127	0.0390206	0.0303064	0.0477776	0.0619872
pol_pos_8180	4.76182	4.42955	4.61284	4.50309	4.54491	4.64988	0.117342	0.073131	0.161935	0.15852	0.105274	0.122808	4.49858	4.39464	4.51856	4.49808	4.08419	4.40793	0.108601	0.0924194	0.112545	0.122259	0.117905	0.118506	4.32626	4.26942	4.41968	4.04623	4.17104	4.31191	0.125421	0.0510288	0.127302	0.0752705	0.0914703	0.115904	4.26146	4.40189	4.43553	4.16247	4.31155	4.37726	0.0711736	0.105058	0.111919	0.155725	0.111718	0.105601
pol_pos_8185	4.1077	4.30207	4.28901	4.42787	4.34518	4.35622	0.0850141	0.040889	0.0523531	0.0717844	0.0964057	0.042302	4.27389	4.2806	4.55222	4.47295	4.62236	4.4161	0.0999444	0.0717419	0.0506514	0.061298	0.0481858	0.0360031	4.43855	4.48867	4.61392	4.65341	4.61199	4.66946	0.0524868	0.0565918	0.0395012	0.0811182	0.0349317	0.0546027	4.42888	4.55156	4.6411	4.69086	4.68266	4.67494	0.0559356	0.0541005	0.0435627	0.0566353	0.0545551	0.0494933
pol_pos_8208	4.87867	4.99317	4.9623	5.08949	4.98444	4.92085	0.0357067	0.0497996	0.0452935	0.0322766	0.0675837	0.0524866	5.01379	5.01549	5.04344	5.00292	5.04931	4.90068	0.0326619	0.0396185	0.0477298	0.0695263	0.0377156	0.0270034	4.83806	4.87107	4.96919	4.94629	4.95973	4.97044	0.0518823	0.0415863	0.0346556	0.0343906	0.0317909	0.0401302	4.935	4.93701	4.96387	5.01945	5.00843	4.99435	0.0431864	0.0438583	0.0528608	0.0398841	0.0473657	0.0498698
pol_pos_8250	NA	NA	NA	NA	NA	NA	NA	NA	NA	NA	NA	NA	NA	NA	NA	NA	NA	NA	NA	NA	NA	NA	NA	NA	4.43208	4.39968	4.47826	4.49138	4.44149	4.51681	0.0584946	0.0417407	0.0326803	0.0428383	0.0336537	0.0351196	4.46963	4.49677	4.50756	4.47996	4.51042	4.55685	0.0462654	0.0549279	0.0397088	0.0222259	0.037885	0.0451751
pol_pos_8288	4.1267	4.12782	4.15643	4.21142	4.19495	4.29742	0.057742	0.0556543	0.0461193	0.0663192	0.0780872	0.0459805	4.11131	4.07501	4.28305	4.18759	4.35234	4.38439	0.132883	0.0534974	0.0756625	0.0858759	0.0462799	0.0520804	NA	NA	3.68941	3.70228	3.72625	3.88758	NA	NA	0.0298896	0.0944197	0.0370067	0.0503283	NA	3.86956	3.69015	3.80435	3.77377	3.88667	NA	0.00146474	0.0269635	0.0128563	0.0730625	0.0403481
pol_pos_834	4.71806	4.6718	4.60794	5.19934	4.69156	4.70832	0.0310175	0.0435126	0.0687259	0.0326389	0.0195778	0.0370888	4.65324	4.54871	4.5327	5.17895	4.7319	4.85076	0.0470969	0.0399883	0.0320732	0.0400615	0.0484282	0.0317365	4.84589	4.85596	4.72366	5.2984	4.82755	4.77445	0.0417951	0.039783	0.0440477	0.0227857	0.0401336	0.0284247	4.71654	4.74795	4.7597	5.21027	4.75508	4.76301	0.0511796	0.0477398	0.0507826	0.035467	0.0362062	0.0480598
pol_pos_8366	4.68178	4.3672	4.69071	4.5341	4.54429	4.68857	0.151793	0.114934	0.0992192	0.103688	0.0754598	0.048102	4.38444	4.47701	4.43033	4.61539	4.34139	4.5676	0.0791626	0.0862103	0.148947	0.11522	0.102467	0.108039	3.80019	3.82161	4.25487	3.85289	3.80719	4.18279	0.143542	0.121203	0.0907729	0.0891618	0.174533	0.108532	4.01224	4.08627	4.21859	4.05133	4.04998	4.08115	0.150905	0.115466	0.0513682	0.125707	0.124857	0.0985069
pol_pos_8374	4.65165	4.65664	4.68698	4.69391	4.74135	4.82782	0.0385744	0.0279907	0.02898	0.0354432	0.051009	0.033025	4.66269	4.63322	4.79683	4.71054	4.88895	4.9073	0.0888762	0.0308247	0.0471964	0.0478437	0.0301864	0.0392327	4.00961	4.02475	4.24036	4.22035	4.26395	4.45868	0.037801	0.037137	0.0212651	0.025986	0.041945	0.0184396	4.0852	4.18586	4.24783	4.32803	4.36916	4.44921	0.0271191	0.0362911	0.0368768	0.0427237	0.0235166	0.0586103
pol_pos_838	4.34556	4.3795	4.39635	4.48408	4.49373	4.48276	0.0598076	0.0349251	0.0204632	0.0586157	0.0565171	0.0405039	4.40987	4.36845	4.56331	4.55753	4.66319	4.73518	0.0970776	0.0375857	0.0378616	0.0643755	0.0432987	0.0312051	4.11483	4.13283	4.29988	4.32195	4.26486	4.3721	0.0550452	0.0251954	0.0335808	0.071932	0.0656	0.0319957	4.26387	4.34882	4.43908	4.5527	4.55092	4.78798	0.0504816	0.069628	0.0633256	0.0142448	0.0501208	0.0567469
pol_pos_8385	NA	NA	3.54885	NA	NA	NA	NA	NA	0.0117262	NA	NA	NA	NA	NA	3.72927	NA	3.82511	NA	NA	NA	0.0794294	NA	0.0508396	NA	4.56496	4.5713	4.7271	4.61208	4.64647	4.83235	0.0320153	0.0232142	0.0260866	0.0590902	0.0309674	0.0353993	4.6594	4.69857	4.7141	4.77803	4.78298	4.86951	0.0296233	0.0406118	0.0356359	0.0186415	0.0393805	0.0631287
pol_pos_8391	4.97839	4.99633	5.03302	5.27583	5.0931	5.09227	0.179624	0.151506	0.149319	0.0372372	0.128277	0.116572	4.97077	4.98774	4.99451	5.04627	5.10545	5.07388	0.187179	0.156091	0.203823	0.15549	0.101462	0.139209	4.91188	4.9589	5.06738	5.10864	5.11315	5.06215	0.251278	0.178397	0.142808	0.145636	0.106857	0.137105	5.008	4.97798	5.17131	5.04983	5.09885	5.06143	0.146167	0.190751	0.0769717	0.175239	0.0973757	0.137243
pol_pos_8431	4.6815	4.25412	3.87316	3.98434	4.62319	4.94447	0.0626977	0.09778	0.0172274	0.0105187	0.0713601	0.0634845	4.58944	4.28075	3.85691	3.82222	4.69045	4.51012	0.0552425	0.163341	0.11173	0.05265	0.0583294	0.0861626	4.80471	4.39208	3.97366	3.92193	4.46753	4.64506	0.0769028	0.0503363	0.0378502	0.0380262	0.0445175	0.095049	4.64065	4.27852	4.00872	3.97402	4.51279	4.55581	0.0404238	0.0861215	0.0727182	0.0513366	0.0526077	0.0821466
pol_pos_8436	4.41382	4.37703	4.36279	4.30181	4.23883	4.35662	0.0979206	0.147105	0.0991119	0.131613	0.0855248	0.0638475	4.3933	4.22535	4.32244	4.26541	4.53881	4.77648	0.0739653	0.0611449	0.0639755	0.0943078	0.0739694	0.0820478	4.12854	4.13604	4.3179	4.24315	4.08418	4.61888	0.0569689	0.0615573	0.0733483	0.0790243	0.0917692	0.0591733	4.26668	4.28153	4.20053	4.17017	4.37333	5.14746	0.073562	0.0747122	0.0580998	0.0656296	0.0930106	0.0840603
pol_pos_8445	4.61501	4.6283	4.66867	4.76873	4.66312	4.71002	0.090748	0.100879	0.108814	0.0693801	0.123279	0.109827	4.64006	4.60194	4.6157	4.65775	4.76381	4.67819	0.10746	0.108239	0.125093	0.111988	0.10483	0.105811	NA	NA	NA	NA	NA	NA	NA	NA	NA	NA	NA	NA	NA	NA	NA	NA	NA	NA	NA	NA	NA	NA	NA	NA
pol_pos_8461	4.4307	4.48714	4.45984	4.50056	4.51817	4.55431	0.0287171	0.022615	0.022416	0.0499182	0.0210873	0.0278342	4.40001	4.47334	4.48262	4.47148	4.50472	4.50582	0.0301886	0.0276925	0.0266611	0.0239874	0.0194753	0.0182734	4.43024	4.45869	4.42395	4.49101	4.48356	4.55552	0.021385	0.0281198	0.0278103	0.0487402	0.0161077	0.0148086	4.3599	4.41024	4.4008	4.44533	4.49712	4.53292	0.0237176	0.0479544	0.0224415	0.0179512	0.0200001	0.0237458
pol_pos_8524	4.78698	4.7898	4.68764	4.52803	4.70958	4.78534	0.0322832	0.041271	0.0351459	0.0331406	0.0607172	0.031933	4.73943	4.84592	4.73642	4.42507	4.81711	4.65475	0.0441094	0.0471336	0.0407953	0.0494682	0.0395371	0.0469214	4.86483	4.80654	4.79201	4.51479	4.80103	4.87889	0.024511	0.0232795	0.0393535	0.0666549	0.0399013	0.0192932	4.8238	4.90964	4.8549	4.64837	4.88964	4.85447	0.0526082	0.0411706	0.0347792	0.0452908	0.0420833	0.0532653
pol_pos_8547	NA	NA	NA	NA	NA	NA	NA	NA	NA	NA	NA	NA	NA	NA	3.38819	NA	3.59025	NA	NA	NA	0.00214027	NA	0.0320183	NA	4.82159	4.80683	4.87503	4.86018	4.80188	4.85989	0.0603366	0.0489854	0.0435628	0.0482361	0.0495309	0.0392148	4.86193	4.84166	4.90678	4.86976	4.85786	4.90145	0.0505538	0.059208	0.0390739	0.0382416	0.0513574	0.0496235
pol_pos_8571	NA	NA	NA	NA	NA	NA	NA	NA	NA	NA	NA	NA	NA	NA	NA	NA	4.46826	5.37868	NA	NA	NA	NA	0.126506	0.0613171	NA	NA	NA	NA	NA	NA	NA	NA	NA	NA	NA	NA	NA	NA	NA	NA	4.75249	5.43971	NA	NA	NA	NA	0.115053	0.156609
pol_pos_8587	NA	NA	NA	NA	NA	NA	NA	NA	NA	NA	NA	NA	NA	NA	NA	NA	NA	NA	NA	NA	NA	NA	NA	NA	4.52055	4.47943	4.62316	4.61657	4.54047	4.65665	0.0544256	0.0609266	0.0375661	0.0535232	0.0314838	0.0373937	4.51529	4.63239	4.63025	4.63164	4.5954	4.63013	0.0692753	0.0680342	0.0486889	0.0477092	0.0479173	0.0646398
pol_pos_8606	4.58994	4.40588	4.66655	4.62081	4.72737	4.92121	0.0534542	0.0560984	0.0695275	0.054839	0.055327	0.0302219	4.45649	4.6617	4.74016	4.78071	4.70094	4.85421	0.119574	0.0412457	0.0420335	0.0728811	0.0264046	0.0558275	4.12435	4.1473	4.36836	4.01717	4.33659	4.6016	0.0768031	0.111255	0.094041	0.0938269	0.0893152	0.08084	4.22308	4.36499	4.47575	4.39927	4.50091	4.59604	0.098064	0.0993298	0.0442393	0.101193	0.0488523	0.0667356
pol_pos_8614	4.38553	4.50281	4.42369	4.57295	4.38024	4.3689	0.104357	0.0749328	0.107194	0.0341606	0.153685	0.0860601	4.53411	4.42127	4.54804	4.46104	4.63546	4.52966	0.105471	0.080141	0.107697	0.0769449	0.0790325	0.0633904	NA	NA	NA	NA	NA	NA	NA	NA	NA	NA	NA	NA	NA	NA	NA	NA	NA	NA	NA	NA	NA	NA	NA	NA
pol_pos_8632	3.76828	3.64256	3.54876	3.55343	3.74604	3.72087	0.0450058	0.0625449	0.0624937	0.136708	0.140845	0.04913	3.67112	3.86216	3.81844	3.69805	3.97173	3.8245	0.0993228	0.0789988	0.0304897	0.0886091	0.0697194	0.0890674	4.30102	4.23433	4.04955	4.04229	4.04565	4.24631	0.151767	0.100102	0.0882066	0.0533639	0.0830164	0.081151	4.40091	4.18588	4.18287	4.21039	4.31648	4.27712	0.128428	0.117226	0.0843348	0.170447	0.0901742	0.0592006
pol_pos_8645	4.18782	4.24798	4.25399	4.40734	4.292	4.26595	0.0804551	0.0642314	0.093696	0.0402443	0.0852059	0.0768044	4.25558	4.2226	4.21023	4.29464	4.33983	4.23964	0.0679223	0.0715881	0.0690023	0.0527356	0.052269	0.041669	4.37245	4.39247	4.39739	4.53172	4.45916	4.37763	0.0709806	0.067846	0.0707151	0.0252646	0.0534919	0.0486399	4.34619	4.36387	4.50186	4.44458	4.43298	4.33105	0.0756525	0.0706982	0.0659732	0.0586762	0.0525964	0.0494443
pol_pos_8712	4.21556	4.32752	4.2161	4.34625	4.36216	4.32352	0.035708	0.0335941	0.0414653	0.0313113	0.0490484	0.0339202	4.18137	4.34806	4.36212	4.26871	4.39584	4.18717	0.0724504	0.04364	0.0757466	0.0438763	0.0517227	0.0740216	4.26549	4.20696	4.29942	4.14429	4.26706	4.43063	0.0319324	0.0402906	0.0740259	0.0726703	0.0553171	0.0195697	4.25788	4.34751	4.19077	4.31497	4.36839	4.38321	0.0705664	0.0514249	0.0384446	0.0247655	0.047291	0.0628747
pol_pos_880	5.38547	5.632	5.77449	5.6446	5.54121	5.19308	0.0277694	0.0481337	0.0448445	0.0418089	0.104421	0.104132	5.4678	5.74339	5.7973	5.52648	5.38795	5.2509	0.034753	0.0418741	0.037906	0.0744206	0.0590795	0.0653154	5.26107	5.57685	5.70264	5.57629	5.37337	5.15621	0.0560656	0.0405072	0.0364974	0.0641911	0.0564868	0.0738842	5.39701	5.69565	5.73584	5.63699	5.23318	5.26835	0.0411138	0.0561801	0.0311242	0.0407127	0.0623424	0.0618826
pol_pos_8818	NA	3.34992	3.37907	3.44445	3.49332	3.34868	NA	0.0222319	0.0453889	0.0101578	0.0505485	0.0633861	NA	3.3562	3.5564	3.44707	3.52925	3.386	NA	0.0775777	0.0605534	0.01437	0.0821021	0.0343421	4.75947	4.77887	4.90031	4.87952	4.86398	4.96431	0.062767	0.0163211	0.0450629	0.0680064	0.0531077	0.035413	4.7499	4.83231	4.87469	4.86045	4.91187	4.96026	0.0657403	0.0390884	0.0594823	0.0428176	0.0437825	0.0693287
pol_pos_8991	4.44566	4.41395	4.34539	4.54602	4.47001	4.40976	0.0623155	0.0482296	0.0592527	0.0583807	0.040336	0.0582997	4.41434	4.35066	4.46732	4.43916	4.47442	4.36868	0.0538799	0.112482	0.05474	0.0561859	0.0414144	0.0549344	4.44972	4.35303	4.42133	4.54407	4.44737	4.38265	0.0378352	0.0384329	0.0356796	0.0717117	0.0468235	0.0399717	4.34679	4.39148	4.37828	4.4836	4.44131	4.40074	0.0645519	0.0475034	0.0506848	0.0241526	0.0552393	0.0359792
pol_pos_9006	4.18633	3.83802	4.00774	3.85456	3.85399	3.96589	0.0532696	0.0298613	0.0780375	0.0845961	0.0717766	0.0415903	3.94397	4.06887	3.91104	4.06634	3.73712	3.96954	0.148892	0.0747133	0.0710386	0.0527814	0.103356	0.0418282	4.22725	4.22765	4.5575	4.22457	4.28293	4.4812	0.0636282	0.049728	0.0200748	0.0410618	0.0399042	0.0508188	4.44961	4.52041	4.37733	4.44882	4.43284	4.37823	0.0484493	0.0655519	0.0434356	0.0521088	0.06376	0.0794673	0.0409209
pol_pos_902	5.00269	4.53151	3.91566	NA	4.59077	4.72788	0.0593598	0.05609	0.0644476	NA	0.0664389	0.0703487	4.93564	4.8039	4.32577	NA	4.86089	4.51686	0.122608	0.0495255	0.0640944	NA	0.0494997	0.041528	4.23359	4.06284	NA	NA	4.09162	4.28135	0.0605604	0.0786807	NA	NA	0.0694171	0.0463523	4.21725	4.03571	3.73728	NA	4.20292	4.21445	0.0600111	0.0386712	0.040513	NA	0.0790894	0.0951403
pol_pos_9020	4.3411	4.35456	4.40301	4.45247	4.40105	4.36584	0.0554305	0.052383	0.0394272	0.0199221	0.033315	0.0340584	4.35128	4.36195	4.35287	4.39829	4.39049	4.38649	0.0451943	0.0430048	0.061232	0.0391525	0.0434318	0.0446333	4.33872	4.37356	4.35872	4.38907	4.37762	4.34442	0.0390477	0.0437937	0.0382052	0.0315397	0.0310318	0.033429	4.32181	4.31022	4.39067	4.36848	4.37824	4.34874	0.0510581	0.0333972	0.0347873	0.0371398	0.0325891	0.0446949
pol_pos_9034	3.80692	3.64192	3.8413	3.69217	3.61917	3.75978	0.0498521	0.121897	0.0596954	0.10075	0.101626	0.0488308	3.66291	3.72508	3.51546	3.77092	3.70958	3.76216	0.111446	0.0948559	0.182374	0.0921368	0.144037	0.107858	4.11428	4.10962	4.1718	4.28187	4.1401	4.27753	0.153407	0.116986	0.139264	0.100888	0.139243	0.101963	4.08362	4.08108	4.20403	4.19891	4.1352	4.26876	0.164627	0.120788	0.155037	0.115962	0.13975	0.112332
pol_pos_9043	4.44628	4.47816	4.45756	4.60508	4.51543	4.50021	0.080003	0.070146	0.0492026	0.0303931	0.0469902	0.0505558	4.41374	4.40838	4.49628	4.50293	4.4895	4.44141	0.0541895	0.0561681	0.0771418	0.0339735	0.0644149	0.0626334	4.43172	4.449	4.51166	4.4722	4.44672	4.46305	0.0659742	0.0536069	0.0555045	0.0905348	0.0489817	0.0624239	4.40606	4.40114	4.47933	4.42238	4.48929	4.39693	0.0609011	0.0708418	0.042955	0.0667969	0.0510583	0.0515193
pol_pos_9045	4.72801	4.667	4.70869	4.92246	4.80478	4.80817	0.103057	0.109917	0.124023	0.0685699	0.0938994	0.11756	4.70395	4.65039	4.75054	4.7355	4.83419	4.76758	0.115259	0.138516	0.149784	0.125027	0.109068	0.127342	4.63817	4.53359	4.71359	4.77498	4.6921	4.68957	0.0921303	0.0978648	0.0977497	0.113817	0.108143	0.113257	4.59406	4.62661	4.76417	4.70124	4.73293	4.73927	0.125198	0.107019	0.0955129	0.108724	0.104126	0.118476
pol_pos_906	3.51941	3.64949	3.48414	3.47442	3.61682	3.77386	0.112861	0.0636104	0.0931821	0.0470576	0.0506955	0.0538103	3.74445	3.47161	3.75777	3.56399	3.87564	3.91394	0.0826343	0.106633	0.0653141	0.0670884	0.0581382	0.0704617	4.1737	4.08905	4.2383	4.16139	4.1037	4.35952	0.0395947	0.0429495	0.055764	0.112634	0.0536545	0.0407398	4.09531	4.20655	4.18595	4.11761	4.16674	4.35493	0.0442195	0.0576556	0.0422687	0.0171262	0.0604615	0.0624972
pol_pos_9122	4.20766	4.54489	4.85672	4.66576	4.69292	4.63511	0.0923164	0.0445887	0.113056	0.0693507	0.0504657	0.16398	4.63375	NA	4.76715	NA	4.93125	4.83526	0.155111	NA	0.0806095	NA	0.0720987	0.0511135	4.85633	4.86826	4.76086	5.00963	4.94363	4.80359	0.0921222	0.0762559	0.0385667	0.11042	0.121921	0.0505797	NA	NA	5.1619	NA	4.74883	NA	NA	NA	0.126093	NA	0.143458	NA
pol_pos_9185	5.07479	5.02884	4.97659	5.13069	4.85701	5.0007	0.0502929	0.0744156	0.078224	0.0471653	0.109458	0.089486	5.04388	5.09987	5.11863	4.86492	5.16053	4.94699	0.0706403	0.0700036	0.0942296	0.184974	0.0568141	0.0666327	5.0741	5.03416	5.1626	5.05239	5.08341	5.13265	0.0451878	0.0404284	0.0504113	0.0518704	0.0509565	0.0349168	5.07441	5.10961	5.1844	5.17562	5.18592	5.19642	0.0504021	0.0515773	0.0550198	0.0392743	0.05378	0.0575838
pol_pos_9330	NA	NA	NA	NA	NA	NA	NA	NA	NA	NA	NA	NA	NA	NA	NA	NA	NA	NA	NA	NA	NA	NA	NA	NA	4.80172	4.82318	4.81672	4.7927	4.81324	4.84107	0.0404021	0.0454639	0.0507091	0.0989477	0.0411965	0.026825	4.73761	4.8873	4.91765	4.85236	4.8481	4.86798	0.0560135	0.0712393	0.0470444	0.0385889	0.035808	0.0404398
pol_pos_9338	4.61969	4.64486	4.65844	4.66926	4.61641	4.73195	0.0546871	0.0544965	0.060049	0.0652469	0.0535209	0.0425692	4.62874	4.67112	4.78916	4.64952	4.77148	4.64588	0.0602069	0.0407896	0.0603426	0.0606078	0.037098	0.0423661	4.1566	4.28272	4.35524	4.26138	4.34191	4.35744	0.0456428	0.0269781	0.0246335	0.0743165	0.0638994	0.0358264	4.15048	4.23434	4.24371	4.33729	4.33782	4.224	0.0533439	0.050782	0.0432868	0.0519343	0.0449785	0.0460409
pol_pos_9376	4.50464	4.45541	4.41145	4.61085	4.53824	4.50062	0.0535406	0.0429617	0.0660689	0.0641019	0.0368599	0.0596023	4.45135	4.40083	4.51188	4.50995	4.50668	4.44496	0.0592588	0.110814	0.0517503	0.0624944	0.0368628	0.0516787	4.46802	4.40146	4.47149	4.59891	4.51595	4.42197	0.0387657	0.0297089	0.0258	0.068256	0.0524011	0.034864	4.37884	4.45108	4.44999	4.54616	4.51332	4.46931	0.0551785	0.0425232	0.0400228	0.0225232	0.0578881	0.0308448
pol_pos_9379	NA	NA	NA	3.79946	NA	NA	NA	NA	NA	0.0217241	NA	NA	NA	3.6393	3.41491	NA	3.6328	3.49041	NA	0.0777229	0.136057	NA	0.0553977	0.0467767	4.37033	4.399	4.40897	4.4859	4.43518	4.37872	0.0629442	0.0573303	0.0591151	0.0522213	0.0521307	0.047361	4.35858	4.35754	4.44673	4.414	4.41595	4.3919	0.0586113	0.0559359	0.0493397	0.0591784	0.0506051	0.0538371
pol_pos_9398	5.55644	5.62904	5.60074	5.73816	5.60001	5.59872	0.0724273	0.0629707	0.0833253	0.00437916	0.102835	0.0752575	5.63025	5.59077	5.64653	5.62859	5.74074	5.66778	0.0800954	0.0743473	0.107646	0.0741909	0.0760244	0.0506464	3.68503	3.58438	3.70793	3.44183	3.54865	3.73351	0.0588731	0.0664005	0.046778	0.158328	0.12182	0.097206	3.88141	3.76619	3.75481	3.58656	3.85241	3.79764	0.0720186	0.0837067	0.0774966	0.0380861	0.0299571	0.123137
pol_pos_9451	4.1552	4.33435	4.31377	4.47186	4.33857	4.34828	0.0300649	0.0473914	0.0531452	0.0357743	0.0786371	0.0694788	4.31732	4.36839	4.48259	4.40923	4.57646	4.37582	0.0586018	0.0472583	0.0562762	0.0411846	0.0519415	0.0448854	4.03997	4.15251	4.2652	4.30794	4.26424	4.32736	0.0690761	0.039325	0.0669122	0.0464582	0.0520159	0.0486088	4.11949	4.23291	4.27879	4.32456	4.33376	4.31816	0.0701369	0.0476935	0.0551165	0.0461479	0.0608842	0.0803004
pol_pos_9544	4.4671	4.60517	4.23167	4.43124	4.36592	4.45665	0.0542672	0.097642	0.126369	0.0784586	0.0929728	0.0711799	4.24762	4.3651	4.44803	4.44712	4.59937	4.60909	0.119893	0.0904331	0.0924569	0.0615092	0.0974742	0.048167	4.68172	4.5256	4.80018	4.63	4.57702	4.92209	0.0536711	0.0760201	0.0487383	0.134336	0.0955435	0.0347441	4.51954	4.63581	4.67321	4.73511	4.75905	4.78616	0.107769	0.0675489	0.0507124	0.0414912	0.0724888	0.102821
pol_pos_9611	4.65407	4.74016	4.69227	4.76395	4.64169	4.64865	0.0660616	0.0436653	0.0718768	0.0235764	0.0856045	0.0500151	4.74181	4.66117	4.71631	4.67863	4.82974	4.8501	0.0741831	0.0413605	0.0726602	0.0566789	0.0644131	0.0281154	4.45237	4.45915	4.52629	4.50094	4.43606	4.50532	0.0454098	0.0452281	0.0434562	0.0309398	0.0682585	0.0386223	4.41104	4.44077	4.4893	4.45094	4.51283	4.71803	0.0688664	0.0396086	0.0582167	0.0437819	0.0475872	0.0706073
pol_pos_9715	5.26902	4.91879	4.5985	4.30264	4.42803	5.38013	0.0348609	0.0891593	0.0548027	0.0691827	0.0725682	0.0326764	5.16028	4.8228	4.67623	4.25796	4.69468	5.1566	0.0941662	0.0490333	0.0770906	0.124964	0.0698547	0.0597418	5.20748	4.88906	4.85687	4.19122	4.53903	5.32423	0.0772423	0.103738	0.0400717	0.0599775	0.106076	0.0681662	5.23061	4.93035	4.70126	4.39149	4.7581	5.12949	0.0805792	0.0540371	0.0723544	0.157644	0.0599017	0.113975	-0.0615455
pol_pos_9847	3.96087	3.90338	3.83958	3.97995	3.94709	3.88945	0.0985199	0.0634259	0.0834307	0.0585756	0.0765967	0.0704016	4.04265	4.0912	4.12993	4.08899	4.2171	4.1149	0.0984213	0.0787912	0.100221	0.102399	0.0799508	0.0942914	3.85362	3.72595	3.88709	3.80134	3.95909	3.98342	0.100529	0.0886779	0.0812175	0.108396	0.114133	0.110246	4.10192	4.02885	4.22506	4.29913	4.17904	4.17921	0.0961211	0.064372	0.0991912	0.0765459	0.0958274	0.132787
pol_pos_9855	NA	NA	NA	NA	NA	NA	NA	NA	NA	NA	NA	NA	NA	NA	NA	NA	NA	NA	NA	NA	NA	NA	NA	NA	4.67797	4.6565	4.73663	4.74125	4.70794	4.7743	0.05387	0.0374487	0.0324295	0.038268	0.0286104	0.0309812	4.719	4.75451	4.75494	4.74349	4.76153	4.80373	0.0478887	0.0507107	0.0386834	0.0219682	0.0402062	0.0404919
pol_pos_9937	NA	NA	NA	NA	NA	NA	NA	NA	NA	NA	NA	NA	NA	NA	NA	NA	NA	NA	NA	NA	NA	NA	NA	NA	4.35915	4.41884	4.42873	4.50888	4.4338	4.43701	0.085387	0.0806426	0.0792356	0.0797272	0.0751881	0.0707237	4.35047	4.36771	4.48299	4.43791	4.44249	4.40085	0.0874019	0.0708553	0.0742609	0.0779013	0.0714244	0.0743888
																																																	0.283814
																																																	1.51857
[truncated: 46 more columns]

## Sheet: Glucosinolates
Table S3. Glucosinolate content change in leaves of Arabidopsis Col-0 and C24 within 48 hours after treatment.
	Col-0	C24	Col-0	C24	Col-0	C24
	log10 FC	log10 FC	fold change	fold change	p-value	p-value
C00007356: 8-Methylthio-octyl glucosinolate	0.109617	0.0287048	1.28 *	1.07	0.040612	0.585937
C00000126: Neoglucobrassicin;1-Methoxy-3-indolylmethylglucosinolate	0.109802	0.32029	1.29	2.09	0.143275	0.719554
C00000128: 4-4-Methoxyglucobrassicin;4-Methoxy-3-indolylmethylglucosinolate	0.227243	0.131666	1.69	1.35	0.0606213	0.84958
C00007352: 7-(Methylsulfinyl)heptyl glucosinolate;Glucoibarin	0.180843	0.10925	1.52 *	1.29	0.0235268	0.91233
C00007821: 2-(4-Methoxyphenyl)-2,2-dimethylethyl glucosinolate	0.291664	0.0439339	1.96	1.11	0.072348	0.405368
C00007845: 9-Methylthiononyl glucosinolate	n.d.	0.00284406	n.d.	1.01	NA	0.0954136
C00007355: 8-Methylsulfinyloctyl glucosinolate;Glucohirsutin	0.150753	0.051318	1.41 *	1.13	0.0424428	0.930276
C00007832: 9-Methylsulfinylnonyl glucosinolate;Glucoarabin	0.144651	0.00479752	1.4	1.01	0.106242	0.849621
C00001488: Sinigrin;2-Phenylethyl glucosinolate;Allyl glucosinolate	0.173332	0.0726758	1.49	1.18	0.20764	0.664164
C00007586: 3-Butenylglucosinolate;Gluconapin | C00007829: 2-Methyl-2-propenyl glucosinolate	0.066973	0.0323318	1.17	1.08	0.181566	0.865913
C00001468: Glucocochlearin;1-Methylpropyl glucosinolate;Glucojiabutin;sec-Butyl glucosinolate | C00007796: n-Butyl glucosinolate | C00007830: 2-Methylpropyl glucosinolate;Isobutyl glucosinolate	0.0123477	0.0132395	1.03	1.03	0.952718	0.316843
C00007340: 3-Hydroxypropyl glucosinolate | C00007817: 2-Hydroxypropyl glucosinolate | C00007826: 1-Methyl-2-hydroxyetyl glucosinolate;Glucosisymbrin	n.d.	0.0628609	n.d.	1.16	NA	0.927565
C00001463: Glucobrassicanapin;4-Pentenyl glucosinolate	n.d.	0.0767387	n.d.	1.19	NA	0.969377
C00001486: Progoitrin;2(R)-2-Hydroxy-3-butenyl glucosinolate | C00007864: 2(S)-Hydroxy-3-butenylglucosinolate;Epiprogoitrin	0.156582	0.0487314	1.43	1.12	0.0584962	0.791545
C00007823: 1-Methylbutyl glucosinolate | C00007824: 2-Methylbutyl glucosinolate | C00007825: 3-Methylbutyl glucosinolate | C00007853: n-Pentyl glucosinolate	0.064467	0.167724	1.16	1.47	0.486179	0.777946
C00007801: 5-Hexenyl glucosinolate	n.d.	0.137955	n.d.	1.37	NA	0.827577
C00007802: n-Hexyl glucosinolate | C00007827: 3-Methylpentyl glucosinolate | C00007828: 4-Methylpentyl glucosinolate	0.0691663	0.205026	1.17	1.6	0.377067	0.960039
C00007802: n-Hexyl glucosinolate | C00007827: 3-Methylpentyl glucosinolate | C00007828: 4-Methylpentyl glucosinolate	0.0663621	0.0663186	1.17	1.16	0.358143	0.491467
C00001473: Glucoiberverin;3-(Methylthio)propyl glucosinolate	0.414048	0.101683	2.59 ***	1.26	0.000193524	0.988297
C00007800: 6-Heptenyl glucosinolate	0.466093	0.107697	2.92 **	1.28	0.00785183	0.922809
C00007344: 4-Methylthiobutyl glucosinolate;Glucoerucin	0.0600289	0.208107	1.15	1.61	0.307377	0.0972756
C00007343: 3-Methylsulfinylpropyl glucosinolate;Glucoiberin	0.099297	0.1149	1.26	1.3	0.132272	0.530104
C00007350: 2-Phenylethylglucosinolate;Gluconasturtiin	0.0854135	0.117238	1.22	1.31	0.246759	0.737371
C00007593: 5-Methylthiopentylglucosinolate;Glucoberteroin	0.120291	0.0878217	1.32 *	1.22	0.0192302	0.541819
C00007545: 4-Methylsulfinylbutyl glucosinolate;Glucoraphanin	0.0787445	0.097907	1.2	1.25	0.217573	0.483915
C00007850: 5-Oxooctyl glucosinolate;Glucocappasalin	n.d.	0.211629	n.d.	1.63	NA	0.190108
C00000125: Glucobrassicin;Glucobrassicine;3-Indolylmethylglucosinolate	0.23397	0.336372	1.71 ***	2.17 *	0.00164814	0.0117244
C00007844: 6-(Methylthio)hexyl glucosinolate;Glucolesquerellin	0.104237	0.118063	1.27	1.31	0.0624851	0.534291
5-Methylsulfinylpentyl glucosinolate;Glucoalyssin	0.155435	0.0609396	1.43	1.15	0.0611404	0.637735
3-Hydroxy-5-(methylthio)pentyl glucosinolate	n.d.	0.0815069	n.d.	1.21	NA	0.765649
C00007855: 4-Phenylbutyl glucosinolate	n.d.	0.184988	n.d.	1.53	NA	0.609158
C00007353: 7-Methylthioheptyl glucosinolate	0.117473	0.076777	1.31 *	1.19	0.0264204	0.692066
C00000127: 4-Hydroxyglucobrassicin;4-Hydroxy-3-indolylmethylglucosinolate	0.0650481	0.175026	1.16	1.5	0.261676	0.0661496
C00000130: 5-Hydroxyglucobrassicin;5-Hydroxy-3-indolylmethylglucosinolate	0.212347	0.308448	1.63	2.03 *	0.0945433	0.0439395
C00007348: 6-Methylsulfinylhexyl glucosinolate;Glucohesperin | C00007813: 3-Hydroxy-6-(methylthio)hexyl glucosinolate	0.184767	0.0920619	1.53 *	1.24	0.0222191	0.867746
C00000126: Neoglucobrassicin;1-Methoxy-3-indolylmethylglucosinolate | C00000128: 4-4-Methoxyglucobrassicin;4-Methoxy-3-indolylmethylglucosinolate	0.0777908	0.311699	1.2	2.05	0.287258	0.72263
C00001488: Sinigrin;2-Phenylethyl glucosinolate;Allyl glucosinolate	n.d.	0.0462652	n.d.	1.11	NA	0.563663
C00001474: Glucolepidiin;Ethyl glucosinolate	0.0638826	n.d.	1.16	n.d.	0.400459	NA
C00007624: 5-Methylthiopentyldesulfoglucosinolate	0.16772	0.0842603	1.47 *	1.21	0.0403033	0.675371
C00007802: n-Hexyl glucosinolate | C00007827: 3-Methylpentyl glucosinolate | C00007828: 4-Methylpentyl glucosinolate	0.00364719	0.071382	1.01	1.18	0.951715	0.300116
C00007856: 3-Phenylpropyl glucosinolate	0.223528	0.101127	1.67 **	1.26	0.00908812	0.173857
