# Supplementary material for: Transcriptomic and Metabolomic Analysis of a Pseudomonas-Resistant versus a Susceptible Arabidopsis Accession
Source: Int J Mol Sci. 2022 Oct 11;23(20):12087. doi: 10.3390/ijms232012087 (PMC9603445; doi:10.3390/ijms232012087)
Supplement: Supplementary file 1 [file ijms-23-12087-s001.zip › Supplemental Table S4.xlsx]

## Sheet: DEGs
Locus	Alias	Full name	Log2 fold change, (Col-0)−(C24)	p-value	GO BP
AT1G24996			7.93824	9.51e-16	---
AT5G49640			6.97501	4.95e-16	biological_process
AT1G31580	ECS1	ECS1	6.75889	1.21e-13	defense response // response to cold // salicylic acid biosynthetic process // defense response, incompatible interaction // photosynthesis, light reaction // defense response to bacterium
AT3G50480	HR4	homolog of RPW8 4	6.66907	5.39e-14	response to other organism
AT5G46510		Disease resistance protein (TIR-NBS-LRR class) family	6.3422	4.56e-13	defense response // defense response // signal transduction
AT3G47680		DNA binding	6.33155	2.67e-14	biological_process
AT4G16860	RPP4	Disease resistance protein (TIR-NBS-LRR class) family	6.08935	9.04e-13	defense response // defense response // defense response // signal transduction // defense response to fungus, incompatible interaction
AT5G50562			5.96101	7.89e-14	biological_process
AT5G42825			5.53851	4.61e-13	biological_process
AT3G30720	QQS	qua-quine starch	5.44868	4.19e-13	starch biosynthetic process
AT4G19500		nucleoside-triphosphatases;transmembrane receptors;nucleotide binding;ATP binding	5.28706	4.45e-13	defense response // defense response // signal transduction
AT5G66052			5.17231	8.81e-10	biological_process
AT3G44798		other RNA	5.14148	2.69e-12	---
AT5G49440			5.10237	4.69e-15	biological_process
AT3G16530		Legume lectin family protein	5.08598	1.42e-08	response to chitin // defense response to fungus
AT5G28919			5.04042	9.45e-10	biological_process
AT5G10610	CYP81K1	cytochrome P450, family 81, subfamily K, polypeptide 1	5.00879	6.67e-14	oxidation-reduction process
AT3G47675			4.95123	6.64e-14	biological_process
AT5G47590		Heat shock protein HSP20/alpha crystallin family	4.8763	6.11e-11	proteolysis
AT5G36930		Disease resistance protein (TIR-NBS-LRR class) family	4.86424	5.63e-13	defense response // defense response // signal transduction
AT2G23985			4.83751	1.09e-12	biological_process
AT5G22700		F-box/RNI-like/FBD-like domains-containing protein	4.81557	4.12e-13	biological_process
AT3G23120	RLP38	receptor like protein 38	4.80117	1.72e-10	defense response // signal transduction
AT1G21130	IGMT4	O-methyltransferase family protein	4.76438	1.21e-12	---
AT4G20480		Putative endonuclease or glycosyl hydrolase	4.75169	1.04e-14	biological_process
AT1G27540		Protein of unknown function (DUF295)	4.74171	1.44e-13	biological_process
AT1G80980			4.71722	1.14e-11	biological_process
AT4G07825			4.66974	2.58e-12	biological_process
AT5G23411			4.55494	1.26e-14	biological_process
AT3G52530		Protein kinase superfamily protein	4.51325	4.29e-13	protein phosphorylation
AT5G18080	SAUR24	SAUR-like auxin-responsive protein family	4.50441	8.22e-11	response to auxin stimulus
AT2G22482			4.41367	2.22e-12	---
AT3G46370		Leucine-rich repeat protein kinase family protein	4.38663	7.01e-07	protein phosphorylation // protein phosphorylation // transmembrane receptor protein tyrosine kinase signaling pathway
AT4G08870	ARGAH2	Arginase/deacetylase superfamily protein	4.33565	4.83e-07	proline metabolic process // tyrosine metabolic process // ornithine metabolic process // polyamine metabolic process // putrescine metabolic process // defense response to fungus
AT5G46500			4.30012	1.24e-09	biological_process
AT4G34881			4.29704	1.17e-11	biological_process
AT1G76960			4.28685	3.83e-07	biological_process
AT4G12020	WRKY19	protein kinase family protein	4.17997	8.04e-11	regulation of transcription, DNA-dependent // protein phosphorylation // cellular membrane fusion // defense response // signal transduction // microsporogenesis // callose deposition in cell wall
AT2G43920	HOL2	S-adenosyl-L-methionine-dependent methyltransferases superfamily protein	4.17437	1.08e-09	metabolic process
AT2G07042		other RNA	4.10953	1.95e-12	---
AT1G61310		LRR and NB-ARC domains-containing disease resistance protein	4.02892	1.23e-12	defense response // defense response
AT2G11271			4.01854	5.01e-11	---
AT5G36350		ECA1 gametogenesis related family protein	4.01133	4.81e-10	---
AT3G62410	CP12-2	CP12 domain-containing protein 2	3.95276	8.4e-11	response to light stimulus // response to blue light // response to high light intensity // response to sucrose stimulus // response to sucrose stimulus // response to red light // regulation of proton transport // response to far red light // peptide cross-linking via L-cystine // reductive pentose-phosphate cycle // cellular response to heat // cellular response to cold // cellular response to …
AT5G43403		other RNA	3.92004	8.18e-12	---
AT1G19080	TTN10	GINS complex protein	3.89883	4.23e-12	DNA-dependent DNA replication // embryo development ending in seed dormancy
AT1G57630		Toll-Interleukin-Resistance (TIR) domain family protein	3.89094	5.07e-07	MAPK cascade // response to molecule of bacterial origin // protein targeting to membrane // defense response // signal transduction // salicylic acid biosynthetic process // defense response, incompatible interaction // salicylic acid mediated signaling pathway // jasmonic acid mediated signaling pathway // regulation of plant-type hypersensitive response // negative regulation of defense respon…
AT1G57860		Translation protein SH3-like family protein	3.85882	1.89e-11	translation // translation
AT1G62510		Bifunctional inhibitor/lipid-transfer protein/seed storage 2S albumin superfamily protein	3.83625	5.99e-07	lipid transport // lipid transport
AT1G77080	MAF1	K-box region and MADS-box transcription factor family protein	3.7515	1.02e-13	regulation of transcription, DNA-dependent // regulation of transcription, DNA-dependent // regulation of flower development // negative regulation of flower development // vernalization response // anthocyanin accumulation in tissues in response to UV light // carpel development // photoperiodism, flowering
AT4G02540		Cysteine/Histidine-rich C1 domain family protein	3.72449	1.13e-10	biological_process // oxidation-reduction process
AT1G51270		structural molecules;transmembrane receptors;structural molecules	3.70128	8.46e-11	signal transduction
AT2G12190		Cytochrome P450 superfamily protein	3.68185	3.62e-10	oxidation-reduction process
AT1G52270			3.65756	6.7e-09	biological_process
AT1G25141		F-box associated ubiquitination effector family protein	3.65686	8.74e-09	---
AT1G06640		2-oxoglutarate (2OG) and Fe(II)-dependent oxygenase superfamily protein	3.65157	9.14e-12	biological_process // sterol biosynthetic process // oxidation-reduction process
AT4G07950		DNA-directed RNA polymerase, subunit M, archaeal	3.6398	1.12e-09	transcription, DNA-dependent // transcription elongation, DNA-dependent // regulation of transcription, DNA-dependent
AT5G23230	NIC2	nicotinamidase 2	3.63819	1.66e-09	metabolic process // metabolic process // NAD metabolic process
AT1G58848		Disease resistance protein (CC-NBS-LRR class) family	3.60846	1.48e-11	defense response // defense response
AT1G62910		Pentatricopeptide repeat (PPR) superfamily protein	3.59232	9.74e-10	---
AT1G52040	MBP1	myrosinase-binding protein 1	3.58874	2.35e-07	defense response
AT1G58150			3.50838	2.7e-09	---
AT2G12170			3.49762	3.64e-12	biological_process
AT1G63350		Disease resistance protein (CC-NBS-LRR class) family	3.45383	1.39e-11	defense response // defense response
AT3G28170			3.44381	3.58e-10	biological_process
AT1G23940		ARM repeat superfamily protein	3.42169	1.81e-10	intracellular protein transport // vesicle-mediated transport
AT1G12010		2-oxoglutarate (2OG) and Fe(II)-dependent oxygenase superfamily protein	3.42164	8.12e-10	ethylene biosynthetic process // oxidation-reduction process // cellular response to fatty acid
AT1G31835			3.41233	7.47e-11	biological_process
AT1G29440		SAUR-like auxin-responsive protein family	3.40956	3.46e-09	response to auxin stimulus // response to brassinosteroid stimulus
AT2G43530		Scorpion toxin-like knottin superfamily protein	3.35411	1.26e-08	maltose metabolic process // defense response // starch biosynthetic process
AT2G09795		other RNA	3.33497	2.38e-11	---
AT3G26200	CYP71B22	cytochrome P450, family 71, subfamily B, polypeptide 22	3.33226	4.18e-07	ethylene mediated signaling pathway // oxidation-reduction process
AT2G13800	SERK5	somatic embryogenesis receptor-like kinase 5	3.32407	2.68e-11	protein phosphorylation // protein phosphorylation
AT3G25010	RLP41	receptor like protein 41	3.31009	8.33e-08	defense response // signal transduction // systemic acquired resistance // response to endoplasmic reticulum stress
AT3G29644		other RNA	3.2837	1.08e-09	---
AT3G44860	FAMT	farnesoic acid carboxyl-O-methyltransferase	3.28237	2.82e-05	---
AT5G28442			3.25072	1.42e-11	---
AT1G65985		Plant protein of unknown function (DUF247)	3.24921	6.88e-11	biological_process
AT4G08410		Proline-rich extensin-like family protein	3.2467	1.84e-07	plant-type cell wall organization
AT4G15990			3.23173	5.05e-08	biological_process
AT1G15885			3.22087	3.66e-12	---
AT5G39160		RmlC-like cupins superfamily protein	3.21647	2.73e-08	biological_process
AT3G29140			3.18071	9.88e-10	biological_process // carpel morphogenesis
AT3G29000		Calcium-binding EF-hand family protein	3.13601	2.85e-06	biological_process
AT4G09430		Disease resistance protein (TIR-NBS-LRR class) family	3.12877	2.11e-11	defense response // defense response // signal transduction
AT5G43050	NPQ6	Protein of unknown function (DUF565)	3.11158	2.19e-12	nonphotochemical quenching
AT5G39190	GLP2A	germin-like protein 2	3.03758	3.57e-08	biological_process
AT4G03500		Ankyrin repeat family protein	3.03338	6e-08	---
AT4G11360	RHA1B	RING-H2 finger A1B	3.01792	2.85e-08	response to chitin // protein ubiquitination // response to cadmium ion
AT4G02000			3.013	2.38e-08	biological_process
AT5G20450			2.99384	1.09e-10	biological_process
AT3G28290	AT14A	Protein of unknown function (DUF677)	2.98432	4.58e-05	---
AT5G27110		Tetratricopeptide repeat (TPR)-like superfamily protein	2.97574	5.18e-09	biological_process
AT4G36130		Ribosomal protein L2 family	2.95996	5.96e-10	translation // translation
AT5G24990		Protein of unknown function (DUF1336)	2.95966	3.78e-10	biological_process
AT3G28130		nodulin MtN21 /EamA-like transporter family protein	2.95826	3.98e-09	biological_process
AT3G44670		Disease resistance protein (TIR-NBS-LRR class) family	2.95496	5.38e-11	defense response // defense response // defense response // signal transduction // defense response to bacterium
AT4G36925			2.94514	1.43e-09	biological_process
AT3G18320		F-box and associated interaction domains-containing protein	2.92753	1.04e-09	biological_process
AT5G38565		F-box/FBD-like domains containing protein	2.91976	4e-10	biological_process
AT5G27100	GLR2.1	glutamate receptor 2.1	2.88736	6.78e-11	transport // cellular calcium ion homeostasis // response to light stimulus // cellular cation homeostasis
AT5G45490		P-loop containing nucleoside triphosphate hydrolases superfamily protein	2.84386	1.54e-09	---
AT1G52260	PDIL1-5	PDI-like 1-5	2.80999	2.63e-07	nuclear division // nucleolus organization // cell redox homeostasis
AT5G36120	YLMG3	cofactor assembly, complex C (B6F)	2.80697	4.42e-08	maltose metabolic process // pentose-phosphate shunt // leaf morphogenesis // thylakoid membrane organization // cytochrome b6f complex assembly // starch biosynthetic process // cell differentiation // positive regulation of catalytic activity // positive regulation of transcription, DNA-dependent
AT3G31068			2.79964	2.64e-09	biological_process
AT4G16880		Leucine-rich repeat (LRR) family protein	2.7793	1.37e-05	biological_process
AT3G43540		Protein of unknown function (DUF1350)	2.77742	2.37e-08	biological_process
AT2G05310			2.73809	1.74e-08	biological_process
AT5G55810	NMNAT	nicotinate/nicotinamide mononucleotide adenyltransferase	2.72947	5.69e-10	biosynthetic process // biosynthetic process // NAD biosynthetic process // NAD biosynthetic process // pollen development // pollen tube growth
AT5G25010		Protein of unknown function (DUF1336)	2.71034	6.4e-08	biological_process
AT4G01985			2.6818	1.49e-05	biological_process
AT3G62460		Putative endonuclease or glycosyl hydrolase	2.67937	6.61e-08	biological_process
AT5G56000	Hsp81.4	HEAT SHOCK PROTEIN 81.4	2.67117	5.86e-10	protein folding // protein folding // response to stress
AT1G65520	PEC11	delta(3), delta(2)-enoyl CoA isomerase 1	2.66187	5.22e-10	fatty acid beta-oxidation // metabolic process // metabolic process // fatty acid catabolic process // proline transport
AT4G11570		Haloacid dehalogenase-like hydrolase (HAD) superfamily protein	2.64961	1.96e-07	metabolic process // chlorophyll catabolic process
AT3G46980	PHT4;3	phosphate transporter 4;3	2.62046	1.25e-09	nitrate transport // transmembrane transport
AT4G25225			2.60852	4.35e-08	---
AT5G63580	FLS2	flavonol synthase 2	2.60418	7.08e-08	flavonoid biosynthetic process // oxidation-reduction process
AT1G53885		Protein of unknown function (DUF581)	2.59051	5.74e-06	biological_process
AT1G29600		Zinc finger C-x8-C-x5-C-x3-H type family protein	2.57939	5.55e-07	biological_process
AT5G36001		RING/U-box superfamily protein	2.57773	3.83e-09	biological_process
AT1G65980	TPX1	thioredoxin-dependent peroxidase 1	2.57295	4.44e-09	toxin catabolic process // response to cadmium ion
AT3G26240		Cysteine/Histidine-rich C1 domain family protein	2.57238	1.18e-06	intracellular signal transduction // oxidation-reduction process
AT1G66660		Protein with RING/U-box and TRAF-like domains	2.56787	1.88e-09	ubiquitin-dependent protein catabolic process // ubiquitin-dependent protein catabolic process // multicellular organismal development // multicellular organismal development // protein ubiquitination
AT2G43535		Scorpion toxin-like knottin superfamily protein	2.56005	6.3e-06	defense response
AT5G44973			2.5172	0.000265709	---
AT1G64260		MuDR family transposase	2.51461	5.51e-09	biological_process
AT2G21830		Cysteine/Histidine-rich C1 domain family protein	2.51025	8.06e-06	intracellular signal transduction // oxidation-reduction process
AT4G01595		Protein kinase superfamily protein	2.50583	1.23e-08	---
AT5G41750		Disease resistance protein (TIR-NBS-LRR class) family	2.50042	9.63e-08	defense response // defense response // signal transduction
AT4G37320	CYP81D5	cytochrome P450, family 81, subfamily D, polypeptide 5	2.49851	1.13e-07	oxidation-reduction process
AT2G23120		Late embryogenesis abundant protein, group 6	2.49593	3.67e-08	biological_process // response to cold // response to water deprivation // response to abscisic acid stimulus
AT5G44420	PDF1.2A	plant defensin 1.2	2.49488	1.15e-05	defense response // defense response // defense response // response to insect // response to ethylene stimulus // response to salicylic acid stimulus // response to jasmonic acid stimulus // jasmonic acid and ethylene-dependent systemic resistance
AT2G11270		citrate synthase-related	2.49341	4.06e-09	cellular carbohydrate metabolic process
AT4G12500		Bifunctional inhibitor/lipid-transfer protein/seed storage 2S albumin superfamily protein	2.4846	6.06e-06	lipid transport // lipid transport
AT4G31650		Transcriptional factor B3 family protein	2.48196	3.97e-09	regulation of transcription, DNA-dependent // regulation of transcription, DNA-dependent
AT1G19397			2.47061	1.34e-08	biological_process
AT2G14460			2.46291	2.26e-08	biological_process
AT3G60960		Tetratricopeptide repeat (TPR)-like superfamily protein	2.45958	3.46e-08	biological_process
AT1G57150		pre-tRNA	2.45672	9.31e-09	---
AT4G01915			2.45627	4.34e-08	biological_process
AT3G46380			2.45618	7.09e-08	biological_process // carpel morphogenesis
AT1G62422			2.43125	1.87e-08	---
AT5G54960	PDC2	pyruvate decarboxylase-2	2.42591	0.000561964	response to hypoxia // gluconeogenesis // cytoskeleton organization // proteasomal protein catabolic process
AT1G34060		Pyridoxal phosphate (PLP)-dependent transferases superfamily protein	2.42322	0.000979862	---
AT1G31380		TRAF-like family protein	2.42051	5.12e-08	biological_process
AT1G16130	WAKL2	wall associated kinase-like 2	2.40196	8.86e-07	protein phosphorylation // protein phosphorylation // response to chitin // protein autophosphorylation // defense response to fungus
AT1G35710		Protein kinase family protein with leucine-rich repeat domain	2.38556	9.5e-05	MAPK cascade // protein phosphorylation // protein phosphorylation // transmembrane receptor protein tyrosine kinase signaling pathway // defense response, incompatible interaction
AT3G16690	SWEET16	Nodulin MtN3 family protein	2.38555	0.000133839	biological_process
AT3G28291			2.36379	6.48e-07	---
AT4G09920		FBD, F-box and Leucine Rich Repeat domains containing protein	2.34064	2.01e-09	biological_process
AT2G33850			2.33504	3.91e-10	biological_process
AT1G14520	MIOX1	myo-inositol oxygenase 1	2.31278	6.89e-08	syncytium formation // inositol catabolic process // oxidation-reduction process
AT4G09680	CTC1	conserved telomere maintenance component 1	2.30847	3.8e-10	telomere maintenance // vernalization response
AT1G80970		XH domain-containing protein	2.30468	6.81e-10	biological_process
AT5G43070	WPP1	WPP domain protein 1	2.30145	2.16e-09	nucleocytoplasmic transport // lateral root development // lateral root development
AT1G44990			2.29078	5.09e-07	biological_process
AT1G67020			2.26063	5.05e-07	biological_process
AT5G10336			2.25919	8.47e-09	biological_process
AT3G53700	MEE40	Pentatricopeptide repeat (PPR) superfamily protein	2.23919	1e-09	embryo development ending in seed dormancy // embryo development ending in seed dormancy // thylakoid membrane organization // vegetative to reproductive phase transition of meristem // iron-sulfur cluster assembly // ovule development
AT2G14660			2.22248	2.06e-07	biological_process
AT2G43620		Chitinase family protein	2.22065	1.27e-05	respiratory burst involved in defense response // carbohydrate metabolic process // amino acid transport // response to chitin // proline transport // cell wall macromolecule catabolic process
AT5G22794			2.21625	2.38e-06	biological_process
AT2G29320		NAD(P)-binding Rossmann-fold superfamily protein	2.19099	4.92e-07	metabolic process
AT1G56540		Disease resistance protein (TIR-NBS-LRR class) family	2.19068	3.61e-08	defense response // defense response // signal transduction
AT1G23650			2.18281	1.42e-07	biological_process
AT3G48280	CYP71A25	cytochrome P450, family 71, subfamily A, polypeptide 25	2.1793	2.61e-06	oxidation-reduction process
AT5G50950	FUM2	FUMARASE 2	2.16341	0.001784	tricarboxylic acid cycle // fumarate metabolic process // fumarate metabolic process // response to salt stress // nitrate assimilation
AT2G11570			2.1596	1.93e-07	biological_process
AT4G01580		AP2/B3-like transcriptional factor family protein	2.15937	8.21e-07	regulation of transcription, DNA-dependent // regulation of transcription, DNA-dependent
AT3G29035	ORS1	NAC domain containing protein 3	2.15243	1.12e-07	regulation of transcription, DNA-dependent // multicellular organismal development // leaf senescence
AT3G25011			2.14513	1.32e-08	---
AT1G30530	UGT78D1	UDP-glucosyl transferase 78D1	2.14208	5.24e-06	metabolic process // flavonol biosynthetic process // flavonol biosynthetic process // response to karrikin
AT3G14210	ESM1	epithiospecifier modifier 1	2.1356	8.47e-08	pentose-phosphate shunt // lipid metabolic process // response to cold // response to insect // photosynthesis // starch biosynthetic process // isopentenyl diphosphate biosynthetic process, mevalonate-independent pathway // glucosinolate metabolic process // glucosinolate biosynthetic process // glucosinolate catabolic process // glucosinolate catabolic process // defense response to bacterium
AT5G45840		Leucine-rich repeat protein kinase family protein	2.13553	2.27e-06	protein phosphorylation // protein phosphorylation // transmembrane receptor protein tyrosine kinase signaling pathway
AT5G24150	SQP1	FAD/NAD(P)-binding oxidoreductase family protein	2.13335	0.00997215	metabolic process // sterol biosynthetic process // sterol biosynthetic process // pentacyclic triterpenoid biosynthetic process // oxidation-reduction process
AT2G07505		zinc ion binding	2.11944	1.5e-07	biological_process
AT1G32720		Cytochrome C oxidase polypeptide VIB family protein	2.11783	6.28e-06	---
AT5G08600		U3 ribonucleoprotein (Utp) family protein	2.11756	1.29e-08	rRNA processing // rRNA processing
AT4G20670		Domain of unknown function (DUF26)	2.11616	4.95e-06	biological_process
AT1G60530	DRP4A	Dynamin related protein 4A	2.11163	1.03e-08	---
AT4G06536		SPla/RYanodine receptor (SPRY) domain-containing protein	2.10517	0.00538025	biological_process
AT3G47360	HSD3	hydroxysteroid dehydrogenase 3	2.07787	4.51e-05	metabolic process
AT4G02850		phenazine biosynthesis PhzC/PhzF family protein	2.07546	3.45e-05	circadian rhythm // biosynthetic process // biosynthetic process // cytokinin mediated signaling pathway
AT4G16850			2.07355	2.11e-09	biological_process
AT5G38010		UDP-Glycosyltransferase superfamily protein	2.0585	7.49e-06	metabolic process
AT2G21850		Cysteine/Histidine-rich C1 domain family protein	2.058	1.24e-07	intracellular signal transduction // oxidation-reduction process
AT3G28070		nodulin MtN21 /EamA-like transporter family protein	2.05552	2.05e-05	biological_process
AT2G24190	SDR2	NAD(P)-binding Rossmann-fold superfamily protein	2.05507	1.58e-05	metabolic process // oxidation-reduction process
AT1G65250		Protein kinase superfamily protein	2.04329	8.87e-09	protein phosphorylation
AT1G55380		Cysteine/Histidine-rich C1 domain family protein	2.03465	1.25e-05	biological_process // oxidation-reduction process
AT3G55170		Ribosomal L29 family protein	2.03458	7.66e-09	translation // translation // ribosome biogenesis
AT5G46010		Homeodomain-like superfamily protein	2.02803	2.36e-07	regulation of transcription, DNA-dependent // regulation of transcription, DNA-dependent
AT5G39320		UDP-glucose 6-dehydrogenase family protein	1.99947	8.17e-09	response to sucrose stimulus // response to glucose stimulus // response to fructose stimulus // oxidation-reduction process
AT1G27180		disease resistance protein (TIR-NBS-LRR class), putative	1.98979	1.09e-09	defense response // defense response // signal transduction
AT3G29670	PMAT2	HXXXD-type acyl-transferase family protein	1.98719	6.75e-07	---
AT5G36360		ECA1 gametogenesis related family protein	1.97876	8.67e-06	---
AT3G52500		Eukaryotic aspartyl protease family protein	1.97725	6.2e-07	polysaccharide biosynthetic process // proteolysis // proteolysis // glycine catabolic process
AT4G14590	emb2739	embryo defective 2739	1.96636	2.95e-09	embryo development ending in seed dormancy
AT4G03292		Polynucleotidyl transferase, ribonuclease H-like superfamily protein	1.9644	6.12e-09	---
AT3G23510		Cyclopropane-fatty-acyl-phospholipid synthase	1.96223	0.000104463	lipid biosynthetic process // lipid biosynthetic process // oxidation-reduction process
AT4G20860		FAD-binding Berberine family protein	1.95335	5.99e-06	respiratory burst involved in defense response // amino acid transport // toxin catabolic process // response to nitrate // response to chitin // response to cyclopentenone // nitrate transport // proline transport // oxidation-reduction process
AT4G12490		Bifunctional inhibitor/lipid-transfer protein/seed storage 2S albumin superfamily protein	1.95167	8.56e-08	lipid transport // lipid transport // defense response to fungus
AT4G12320	CYP706A6	cytochrome P450, family 706, subfamily A, polypeptide 6	1.9451	7.54e-06	oxidation-reduction process
AT4G19340		SCD6 protein-related	1.94233	6.56e-06	biological_process
AT4G19260		Galactose oxidase/kelch repeat superfamily protein	1.93066	6.84e-07	biological_process
AT4G09420		Disease resistance protein (TIR-NBS class)	1.92394	8.72e-07	defense response // defense response // signal transduction
AT4G15660		Thioredoxin superfamily protein	1.91622	1.33e-05	cell redox homeostasis
AT1G47820			1.90329	1.6e-08	biological_process
AT4G20650		receptor-like protein kinase-related	1.90012	4.73e-07	biological_process
AT2G25450		2-oxoglutarate (2OG) and Fe(II)-dependent oxygenase superfamily protein	1.89248	6.38e-08	regulation of glucosinolate biosynthetic process // glucosinolate biosynthetic process // oxidation-reduction process
AT4G03811		other RNA	1.89145	7.66e-08	---
AT2G26020	PDF1.2b	plant defensin 1.2b	1.89057	0.00178371	defense response // defense response // ethylene mediated signaling pathway
AT2G15310	ATARFB1A	ADP-ribosylation factor B1A	1.87833	1.64e-07	small GTPase mediated signal transduction
AT3G05152		other RNA	1.87365	5.29e-08	---
AT1G23935			1.87355	7.24e-08	biological_process
AT2G43590		Chitinase family protein	1.87014	4.74e-07	carbohydrate metabolic process // cell wall macromolecule catabolic process
AT1G32310			1.86843	4.64e-09	gamete generation // biological_process // regulation of DNA endoreduplication // regulation of cell division // regulation of unidimensional cell growth
AT1G33600		Leucine-rich repeat (LRR) family protein	1.85853	3.35e-05	MAPK cascade // regulation of transcription, DNA-dependent // protein targeting to membrane // signal transduction // response to bacterium // systemic acquired resistance, salicylic acid mediated signaling pathway // jasmonic acid mediated signaling pathway // regulation of hydrogen peroxide metabolic process // regulation of plant-type hypersensitive response // negative regulation of defense r…
AT3G16410	NSP4	nitrile specifier protein 4	1.85541	9.53e-07	glucosinolate catabolic process // nitrile biosynthetic process
AT4G12170		Thioredoxin superfamily protein	1.85056	1.4e-07	glycerol ether metabolic process // cell redox homeostasis
AT1G03495		HXXXD-type acyl-transferase family protein	1.84381	1.53e-05	#N/A
AT4G05130	ENT4	equilibrative nucleoside transporter 4	1.84045	2.31e-06	transport
AT3G59250		F-box/RNI-like superfamily protein	1.83995	1.59e-07	biological_process
AT5G56030	HSP90.2	heat shock protein 81-2	1.83401	1.71e-06	protein folding // protein folding // response to stress // defense response // response to heat // response to water deprivation // response to mechanical stimulus // response to salt stress // defense response to bacterium, incompatible interaction // flower development // negative regulation of seed germination // heat acclimation // calcium-mediated signaling // leaf development // protein st…
AT4G03505			1.82755	1.22e-08	biological_process
AT3G18880		Nucleic acid-binding, OB-fold-like protein	1.82674	3.06e-07	transcription elongation, DNA-dependent // translation // translation
AT4G15620		Uncharacterised protein family (UPF0497)	1.82481	0.000229541	biological_process
AT2G05440	GRP9	GLYCINE RICH PROTEIN 9	1.82398	7.38e-05	biological_process
AT1G48720			1.82164	0.0018633	biological_process
AT4G39180	SEC14	Sec14p-like phosphatidylinositol transfer family protein	1.81797	1e-08	phosphatidylcholine biosynthetic process // transport
AT5G24355			1.81468	1.04e-05	biological_process
AT1G11850			1.80863	4.26e-08	biological_process
AT3G21351			1.80591	0.00158034	---
AT3G25013		Synaptobrevin family protein	1.80507	1.53e-07	vesicle-mediated transport
AT5G22300	NIT4	nitrilase 4	1.80365	0.00164458	nitrogen compound metabolic process // cyanide metabolic process // detoxification of nitrogen compound
AT1G57450		pre-tRNA	1.80198	2.73e-06	---
AT5G36320		ECA1 gametogenesis related family protein	1.80123	3.49e-07	---
AT5G43150			1.80115	0.00784094	biological_process // chlorophyll catabolic process
AT1G55990		glycine-rich protein	1.79761	9.41e-07	biological_process
AT1G57420		pre-tRNA	1.79228	1.75e-08	---
AT5G27247			1.78503	9.22e-07	biological_process
AT4G20630		Protein with domains of unknown function (DUF26 and DUF1204)	1.7761	3.39e-08	biological_process
AT5G40330	MYB23	myb domain protein 23	1.77486	4.17e-06	cell fate specification // regulation of transcription, DNA-dependent // epidermal cell differentiation // trichome differentiation // root epidermal cell differentiation // trichome branching // trichome patterning
AT1G03550		Secretory carrier membrane protein (SCAMP) family protein	1.75989	0.000277248	cellular membrane fusion // protein transport // vesicle-mediated transport
AT3G43940			1.75861	1.47e-06	biological_process
AT5G37410		Family of unknown function (DUF577)	1.74419	3e-09	biological_process
AT5G44490		FBD, F-box, Skp2-like and Leucine Rich Repeat domains containing protein	1.73613	2.16e-06	biological_process
AT2G04032	ZIP7	zinc transporter 7 precursor	1.73181	0.000170566	cation transport // iron ion transport // water transport // vernalization response // cellular response to iron ion starvation // metal ion transport // transmembrane transport // zinc ion transmembrane transport
AT5G41740		Disease resistance protein (TIR-NBS-LRR class) family	1.72903	1.06e-07	defense response // defense response // signal transduction
AT1G51520		RNA-binding (RRM/RBD/RNP motifs) family protein	1.72668	7.74e-08	biological_process
AT3G43490		Zinc knuckle (CCHC-type) family protein	1.7152	3.54e-05	biological_process
AT2G10557			1.71504	1.72e-06	---
AT4G13160		Protein of unknown function, DUF593	1.70996	4.74e-05	protein autophosphorylation
AT1G31820		Amino acid permease family protein	1.70641	2.54e-05	amino acid transmembrane transport // transport // sterol biosynthetic process // sphingoid biosynthetic process // transmembrane transport
AT1G62620		Flavin-binding monooxygenase family protein	1.70203	3.52e-07	oxidation-reduction process
AT1G64700			1.69673	6.49e-08	---
AT1G14530	THH1	Protein of unknown function (DUF1084)	1.69183	1.87e-09	biological_process
AT3G43722			1.68481	1.45e-05	biological_process
AT4G09500		UDP-Glycosyltransferase superfamily protein	1.68408	0.000141659	metabolic process
AT3G03830		SAUR-like auxin-responsive protein family	1.6837	0.000175507	response to auxin stimulus // response to brassinosteroid stimulus
AT1G59171		Inositol-pentakisphosphate 2-kinase family protein	1.66362	3.68e-07	---
AT4G04775		zinc ion binding	1.65321	7.94e-06	---
AT1G58725		GDSL-like Lipase/Acylhydrolase superfamily protein	1.6471	2.9e-05	lipid metabolic process
AT1G19260		TTF-type zinc finger protein with HAT dimerisation domain	1.63903	0.000737861	biological_process
AT3G44970		Cytochrome P450 superfamily protein	1.6315	0.000357891	oxidation-reduction process
AT2G30945			1.63015	1.17e-06	---
AT1G54050		HSP20-like chaperones superfamily protein	1.62948	0.000508035	protein folding // response to heat // response to heat // response to heat // response to high light intensity // response to high light intensity // response to hydrogen peroxide // response to hydrogen peroxide
AT2G31271			1.62418	4.12e-06	---
AT4G19700	RING	SBP (S-ribonuclease binding protein) family protein	1.62371	0.000181166	response to gibberellin stimulus // defense response to bacterium // defense response to fungus
AT4G16960		Disease resistance protein (TIR-NBS-LRR class) family	1.61939	8.31e-06	defense response // defense response // signal transduction
AT5G37950		UDP-Glycosyltransferase superfamily protein	1.60727	1.59e-05	metabolic process
AT1G62670	RPF2	rna processing factor 2	1.60383	5.45e-06	RNA 5'-end processing
AT3G44713			1.60192	4.51e-07	biological_process
AT1G50050		CAP (Cysteine-rich secretory proteins, Antigen 5, and Pathogenesis-related 1 protein) superfamily protein	1.59768	5.85e-06	biological_process
AT5G10605		methyltransferases	1.59654	7.66e-07	rRNA processing
AT1G69550		disease resistance protein (TIR-NBS-LRR class)	1.59619	3.97e-07	defense response // defense response // signal transduction
AT4G09760		Protein kinase superfamily protein	1.59465	0.000219877	---
AT2G40670	RR16	response regulator 16	1.59134	0.00556492	two-component signal transduction system (phosphorelay) // regulation of transcription, DNA-dependent // regulation of transcription, DNA-dependent // circadian rhythm // response to cytokinin stimulus // cytokinin mediated signaling pathway // cytokinin mediated signaling pathway
AT4G13920	RLP50	receptor like protein 50	1.58565	5.43e-06	defense response // signal transduction
AT4G09649			1.58109	3.98e-05	biological_process
AT1G72930	TIR	toll/interleukin-1 receptor-like	1.57491	2.47e-05	defense response // signal transduction
AT4G01450		nodulin MtN21 /EamA-like transporter family protein	1.56521	1.97e-05	---
AT3G44490	hda17	histone deacetylase 17	1.56016	4.28e-07	histone deacetylation
AT1G75250	RSM3	RAD-like 6	1.55798	0.00011789	regulation of transcription, DNA-dependent
AT1G53870		Protein of unknown function (DUF567)	1.55768	6.22e-05	biological_process
AT4G00380	FDM2	XH/XS domain-containing protein	1.55355	3.53e-06	RNA-directed DNA methylation
AT5G40500			1.54825	0.000323864	phosphatidylinositol biosynthetic process // biological_process
AT1G05200	GLUR3	glutamate receptor 3.4	1.54625	5.85e-07	#N/A
AT1G33770		Protein kinase superfamily protein	1.54038	1.41e-06	protein phosphorylation
AT4G00315		F-box/RNI-like/FBD-like domains-containing protein	1.53108	0.00028144	biological_process
AT1G58160		Mannose-binding lectin superfamily protein	1.52621	6.66e-05	biological_process
AT5G36330		ECA1 gametogenesis related family protein	1.52497	5.53e-07	---
AT5G44578			1.51919	0.000388936	biological_process
AT1G64230	UBC28	ubiquitin-conjugating enzyme 28	1.51063	1.63e-06	postreplication repair // ubiquitin-dependent protein catabolic process // ubiquitin-dependent protein catabolic process // fatty acid beta-oxidation // cellular membrane fusion // protein import into peroxisome matrix // DNA endoreduplication // proteasomal ubiquitin-dependent protein catabolic process // proteasome assembly // cellular macromolecule catabolic process // Golgi vesicle transport …
AT1G34760	RHS5	general regulatory factor 11	1.50983	1.36e-05	---
AT4G24410			1.50633	3.45e-07	biological_process
AT1G12290		Disease resistance protein (CC-NBS-LRR class) family	1.50624	2.9e-06	N-terminal protein myristoylation // defense response // defense response
AT2G17880		Chaperone DnaJ-domain superfamily protein	1.50132	0.000164105	protein folding // response to sucrose stimulus // response to fructose stimulus
AT1G48390		RNI-like superfamily protein	1.50017	1.12e-05	biological_process
AT2G11778			1.49904	3.57e-05	---
AT4G06534			1.49384	0.00623402	biological_process
AT5G44560	VPS2.2	SNF7 family protein	1.48241	3.41e-08	microtubule cytoskeleton organization // cytokinesis by cell plate formation // DNA replication // DNA methylation // cell proliferation // protein transport // vesicle-mediated transport // histone phosphorylation // anaphase // histone H3-K9 methylation
AT5G44540		Tapetum specific protein TAP35/TAP44	1.48238	0.00029496	biological_process
AT5G38050		RNA polymerase II transcription elongation factor	1.48089	1.39e-07	biological_process
AT2G06002		other RNA	1.47985	5.47e-05	---
AT2G21640			1.47338	3.45e-05	response to oxidative stress
AT5G39090		HXXXD-type acyl-transferase family protein	1.47071	0.00140253	proline transport
AT4G22950	GL19	AGAMOUS-like 19	1.46261	1.69e-05	regulation of transcription, DNA-dependent // regulation of transcription, DNA-dependent // vernalization response // vernalization response // anthocyanin accumulation in tissues in response to UV light // carpel development // regulation of timing of transition from vegetative to reproductive phase
AT4G11210		Disease resistance-responsive (dirigent-like protein) family protein	1.45036	3.87e-05	defense response // lignan biosynthetic process
AT2G13422			1.43861	0.000979049	---
AT2G39030	NATA1	Acyl-CoA N-acyltransferases (NAT) superfamily protein	1.42973	0.0083476	ornithine metabolic process // metabolic process // response to jasmonic acid stimulus
AT1G24530		Transducin/WD40 repeat-like superfamily protein	1.42941	0.00430613	oligopeptide transport // biological_process // response to brassinosteroid stimulus
AT5G54145			1.42874	1.07e-07	biological_process
AT5G40790			1.42511	0.0042561	biological_process
AT1G27190		Leucine-rich repeat protein kinase family protein	1.42047	4.86e-06	protein phosphorylation // protein phosphorylation // transmembrane receptor protein tyrosine kinase signaling pathway
AT5G50570	SPL13A	Squamosa promoter-binding protein-like (SBP domain) transcription factor family protein	1.41949	0.00199956	regulation of transcription, DNA-dependent // anther development
AT2G43270		F-box and associated interaction domains-containing protein	1.41719	8.97e-07	biological_process
AT4G14980		Cysteine/Histidine-rich C1 domain family protein	1.41408	1.75e-07	intracellular signal transduction // oxidation-reduction process
AT5G36658		ECA1 gametogenesis related family protein	1.41348	2.14e-06	---
AT2G03270		DNA-binding protein, putative	1.41218	1.13e-06	---
AT3G46616			1.40672	2.77e-05	biological_process
AT3G58430		TRAF-like family protein	1.40623	4.64e-07	biological_process
AT4G29735			1.39701	3.59e-07	biological_process
AT3G44440			1.39298	0.000120352	biological_process
AT2G11405			1.38912	1.05e-05	biological_process
AT4G39986			1.38897	0.000319253	biological_process
AT4G15096			1.38675	6.52e-07	biological_process
AT4G21400	CRK28	cysteine-rich RLK (RECEPTOR-like protein kinase) 28	1.37881	0.00358153	respiratory burst involved in defense response // protein phosphorylation // response to chitin
AT5G58390		Peroxidase superfamily protein	1.37866	1.18e-05	response to oxidative stress // oxidation-reduction process
AT5G46220		Protein of unknown function (DUF616)	1.37788	3.65e-06	ceramide metabolic process // biological_process
AT1G65510			1.37371	7.43e-06	phosphatidylinositol biosynthetic process
AT5G16980		Zinc-binding dehydrogenase family protein	1.37188	0.000176056	response to oxidative stress // toxin catabolic process // response to cyclopentenone // oxidation-reduction process
AT4G19120	ERD3	S-adenosyl-L-methionine-dependent methyltransferases superfamily protein	1.36638	0.00159274	response to desiccation // response to cold // response to salt stress // response to abscisic acid stimulus
AT3G24535			1.3643	6.13e-05	biological_process
AT3G12820	MYB10	myb domain protein 10	1.34384	8.66e-06	regulation of transcription, DNA-dependent
AT2G32160		S-adenosyl-L-methionine-dependent methyltransferases superfamily protein	1.34087	0.000146078	biological_process
AT5G57565		Protein kinase superfamily protein	1.34072	7.29e-06	protein phosphorylation
AT3G05890	RCI2B	Low temperature and salt responsive protein family	1.33997	0.00520352	response to cold
AT5G44980		F-box/RNI-like/FBD-like domains-containing protein	1.33691	5.84e-06	---
AT5G44574			1.33231	7.35e-05	biological_process
AT1G59970		Matrixin family protein	1.33029	7.29e-05	proteolysis // proteolysis // metabolic process
AT5G43620		Pre-mRNA cleavage complex II	1.32789	7.27e-05	biological_process
AT1G23965			1.32604	0.00020754	biological_process
AT2G04070		MATE efflux family protein	1.32343	0.00261279	transport // drug transmembrane transport // transmembrane transport
AT5G38000		Zinc-binding dehydrogenase family protein	1.31694	0.000728583	response to oxidative stress // oxidation-reduction process
AT5G39210	CRR7	chlororespiratory reduction 7	1.31548	0.000114837	maltose metabolic process // photosystem II assembly // NAD(P)H dehydrogenase complex assembly // NAD(P)H dehydrogenase complex assembly // mRNA modification // starch biosynthetic process
AT4G01335			1.31058	0.00335828	biological_process
AT4G10160		RING/U-box superfamily protein	1.30882	1.58e-05	protein ubiquitination
AT1G05420	OFP12	ovate family protein 12	1.30642	0.00024578	#N/A
AT5G41650		Lactoylglutathione lyase / glyoxalase I family protein	1.30532	0.00176007	metabolic process
AT4G02890	UBQ14	Ubiquitin family protein	1.30273	0.000490752	cellular protein modification process // ubiquitin-dependent protein catabolic process
AT4G15953		Maternally expressed gene (MEG) family protein	1.30245	1.89e-06	---
AT2G24870		Plant self-incompatibility protein S1 family	1.29948	1.53e-06	biological_process
AT1G34910			1.29628	1.42e-05	biological_process
AT4G09840			1.29232	1.12e-06	biological_process // carpel morphogenesis
AT4G11370	RHA1A	RING-H2 finger A1A	1.29011	0.000214712	ethylene biosynthetic process // response to ethylene stimulus
AT4G29700		Alkaline-phosphatase-like family protein	1.28954	0.0013603	metabolic process // nucleotide metabolic process
AT3G54260	TBL36	TRICHOME BIREFRINGENCE-LIKE 36	1.28733	2.56e-05	biological_process // xylem development // cellular cell wall macromolecule metabolic process
AT3G56770		basic helix-loop-helix (bHLH) DNA-binding superfamily protein	1.28496	3.25e-06	regulation of transcription, DNA-dependent // response to chitin
AT3G31051			1.2802	0.000144519	biological_process
AT3G50270		HXXXD-type acyl-transferase family protein	1.27959	5.67e-07	---
AT2G23100		Cysteine/Histidine-rich C1 domain family protein	1.27938	0.000313566	oxidation-reduction process
AT1G34810		Plant thionin family protein	1.27857	3.31e-05	---
AT5G44430	PDF1.2c	plant defensin 1.2C	1.27599	0.000482716	defense response // defense response
AT1G56940		pre-tRNA	1.27452	0.000131568	---
AT4G02430	SR34b	RNA-binding (RRM/RBD/RNP motifs) family protein	1.26961	8.48e-07	biological_process // vegetative to reproductive phase transition of meristem // protein desumoylation // hydrogen peroxide biosynthetic process
AT1G35320			1.26551	2.24e-05	biological_process
AT5G36490		ECA1 gametogenesis related family protein	1.26382	2.42e-05	---
AT5G08535		D111/G-patch domain-containing protein	1.25892	8.84e-07	biological_process
AT5G03400			1.25869	4.58e-06	biological_process
AT1G34840		Plant thionin family protein	1.25804	1.9e-05	---
AT2G40010		Ribosomal protein L10 family protein	1.2476	1.77e-06	RNA methylation // translation // translational elongation // translational elongation // ribosome biogenesis
AT5G24920	GDU5	glutamine dumper 5	1.24634	7.58e-05	regulation of amino acid export
AT5G18065			1.24532	1.95e-05	biological_process
AT3G56790		RNA splicing factor-related	1.24246	0.00144984	biological_process
AT3G53420	PIP2A	plasma membrane intrinsic protein 2A	1.2424	4.39e-06	glycolysis // transport // transport // calcium ion transport // iron ion transport // water transport // water transport // water transport // response to osmotic stress // hyperosmotic response // Golgi organization // response to temperature stimulus // response to desiccation // response to cold // response to water deprivation // response to salt stress // response to abscisic acid stimulus …
AT1G43310		Nucleotide-sugar transporter family protein	1.24028	0.000148214	biological_process
AT3G16020		F-box associated ubiquitination effector protein	1.23633	2.82e-06	lipid metabolic process // sister chromatid cohesion // reciprocal meiotic recombination // vernalization response // regulation of chromosome organization // intracellular signal transduction // meiotic DNA double-strand break formation // meiotic chromosome segregation
AT3G57520	SIP2	seed imbibition 2	1.23048	0.00750391	response to oxidative stress // raffinose catabolic process // response to karrikin
AT4G01380		plastocyanin-like domain-containing protein	1.23012	0.0065032	biological_process
AT3G16360	AHP4	HPT phosphotransmitter 4	1.21979	0.00861583	two-component signal transduction system (phosphorelay) // two-component signal transduction system (phosphorelay) // cytokinin mediated signaling pathway // regulation of cytokinin mediated signaling pathway
AT5G44005			1.21627	0.00326076	biological_process
AT1G23950		Protein of unknown function (DUF626)	1.21605	0.000162497	biological_process
AT4G36050		endonuclease/exonuclease/phosphatase family protein	1.21542	4.45e-07	---
AT1G09680		Pentatricopeptide repeat (PPR) superfamily protein	1.21533	6.87e-05	biological_process
AT5G27230		Frigida-like protein	1.21494	5.13e-06	biological_process
AT4G07940		Protein of unknown function (DUF3245)	1.21467	0.000131993	biological_process
AT4G30290	XTH19	xyloglucan endotransglucosylase/hydrolase 19	1.21426	0.00148591	carbohydrate metabolic process // cellular glucan metabolic process // xyloglucan metabolic process
AT5G37620		Cysteine/Histidine-rich C1 domain family protein	1.20421	0.000765381	biological_process // oxidation-reduction process
AT1G36510		Nucleic acid-binding proteins superfamily	1.20113	1.22e-05	biological_process
AT4G10450		Ribosomal protein L6 family	1.1953	3.65e-05	RNA methylation // translation // translation
AT1G17250	RLP3	receptor like protein 3	1.19294	5.73e-06	signal transduction
AT3G29280			1.18961	6.24e-05	biological_process
AT5G36480		ECA1 gametogenesis related family protein	1.17923	0.00281884	---
AT2G43820	UGT74F2	UDP-glucosyltransferase 74F2	1.1778	0.00300589	metabolic process // salicylic acid metabolic process // response to nitrate // nitrate transport // benzoate metabolic process // para-aminobenzoic acid metabolic process // para-aminobenzoic acid metabolic process
AT5G46640		AT hook motif DNA-binding family protein	1.17754	1.11e-05	---
AT4G13500			1.17622	0.000659669	biological_process
AT3G49620	DIN11	2-oxoglutarate (2OG) and Fe(II)-dependent oxygenase superfamily protein	1.1749	0.00589763	aging // cellular response to starvation // response to ethylene stimulus // oxidation-reduction process
AT1G65500			1.17148	0.00251432	biological_process
AT1G01380	ETC1	Homeodomain-like superfamily protein	1.17135	0.00154964	#N/A
AT1G66650		Protein with RING/U-box and TRAF-like domains	1.16838	8.46e-06	ubiquitin-dependent protein catabolic process // ubiquitin-dependent protein catabolic process // multicellular organismal development // multicellular organismal development // protein ubiquitination
AT3G28216			1.16474	0.00103407	---
AT3G24515	UBC37	ubiquitin-conjugating enzyme 37	1.16326	6.73e-05	---
AT3G23245			1.16297	0.000171515	biological_process
AT4G01533		other RNA	1.16252	0.000114709	---
AT1G67460		Minichromosome maintenance (MCM2/3/5) family protein	1.1614	2.49e-05	---
AT1G58380	XW6	Ribosomal protein S5 family protein	1.16112	3.02e-05	translation // translation
AT1G74810	BOR5	HCO3- transporter family	1.15887	0.00295208	anion transport
AT5G39380		Plant calmodulin-binding protein-related	1.15788	3.31e-05	biological_process
AT2G07773			1.15489	8.62e-07	biological_process
AT5G15690		zinc ion binding	1.15382	0.00807212	response to cadmium ion
AT1G65295			1.15291	0.00029965	---
AT1G22370	UGT85A5	UDP-glucosyl transferase 85A5	1.1518	0.000302585	metabolic process
AT5G45070	PP2-A8	phloem protein 2-A8	1.15032	0.000172388	transition metal ion transport // defense response // signal transduction
AT4G04810	MSRB4	methionine sulfoxide reductase B4	1.14924	0.00254814	oxidation-reduction process
AT4G01350		Cysteine/Histidine-rich C1 domain family protein	1.14645	8.02e-05	response to chitin // intracellular signal transduction // oxidation-reduction process
AT3G48346			1.1464	0.00407188	biological_process
AT3G55910			1.14632	6.12e-05	biological_process
AT1G61580	RPL3B	R-protein L3 B	1.14425	0.00554632	translation // translation // nucleotide biosynthetic process // plant-type cell wall cellulose metabolic process // cell wall pectin metabolic process
AT5G54480		Protein of unknown function (DUF630 and DUF632)	1.13921	1.05e-05	---
AT2G12461			1.13366	0.00076776	---
AT5G37500	GORK	gated outwardly-rectifying K+ channel	1.1322	5.22e-05	ion transport // potassium ion transport // response to cold // response to water deprivation // response to abscisic acid stimulus // response to jasmonic acid stimulus // transmembrane transport
AT5G57790			1.13177	0.00485325	biological_process
AT1G69540	AGL94	AGAMOUS-like 94	1.13052	5.94e-05	---
AT2G47485			1.12697	0.000195347	---
AT5G47330		alpha/beta-Hydrolases superfamily protein	1.12672	0.00675959	cellular protein modification process // amino acid transport // proline transport
AT5G43730		Disease resistance protein (CC-NBS-LRR class) family	1.12372	2.82e-05	defense response // defense response
AT5G08565		Transcription initiation Spt4-like protein	1.1223	7.71e-05	RNA splicing, via endonucleolytic cleavage and ligation // regulation of transcription, DNA-dependent // transcription from RNA polymerase II promoter // positive regulation of transcription elongation, DNA-dependent
AT5G28810		Domain of unknown function (DUF1985)	1.12101	0.00205442	biological_process
AT2G47270	UPB1	sequence-specific DNA binding transcription factors;transcription regulators	1.11949	0.00425009	regulation of transcription, DNA-dependent // regulation of root development
AT3G30370			1.11627	8.7e-05	biological_process
AT2G35830			1.11516	0.00138708	biological_process
AT2G38180		SGNH hydrolase-type esterase superfamily protein	1.10327	1.93e-05	lipid metabolic process // vegetative to reproductive phase transition of meristem // protein desumoylation // hydrogen peroxide biosynthetic process
AT1G17240	RLP2	receptor like protein 2	1.10204	8.9e-06	signal transduction
AT1G64800		DNA binding;sequence-specific DNA binding transcription factors	1.09715	0.00102787	regulation of transcription, DNA-dependent // plant-type cell wall modification
AT3G53342			1.09589	0.00913105	biological_process
AT2G03980		GDSL-like Lipase/Acylhydrolase superfamily protein	1.09535	1.34e-05	lipid metabolic process
AT5G45973			1.09522	0.0035276	biological_process
AT2G13660			1.09066	1.45e-05	---
AT2G11891			1.08938	0.000127941	---
AT3G60075		pre-tRNA	1.08796	0.000580604	---
AT2G34780	MEE22	maternal effect embryo arrest 22	1.08778	2.01e-05	mitotic recombination // chromatin silencing // mRNA export from nucleus // sister chromatid cohesion // embryo sac egg cell differentiation // photomorphogenesis // embryo development ending in seed dormancy // embryo development ending in seed dormancy // embryo development ending in seed dormancy // seed germination // determination of bilateral symmetry // embryonic pattern specification // r…
AT3G27980		Plant invertase/pectin methylesterase inhibitor superfamily	1.08568	9.11e-05	cell wall modification
AT4G16835		Tetratricopeptide repeat (TPR)-like superfamily protein	1.08375	0.00027733	biological_process
AT1G57460		pre-tRNA	1.08049	0.000646474	---
AT5G17080		Cysteine proteinases superfamily protein	1.07842	0.00197811	proteolysis
AT1G52410	TSA1	TSK-associating protein 1	1.07835	0.0021621	defense response to fungus
AT1G56250	PP2-B14	phloem protein 2-B14	1.07125	0.00365187	---
AT5G45440		P-loop containing nucleoside triphosphate hydrolases superfamily protein	1.07069	3.7e-05	---
AT1G67260	TCP1	TCP family transcription factor	1.07066	0.00534576	flower development
AT5G63952			1.06904	2.79e-05	biological_process
AT2G05360			1.06804	6.83e-05	biological_process
AT5G46790	RCAR12	PYR1-like 1	1.06635	0.000593891	tryptophan catabolic process // indoleacetic acid biosynthetic process // abscisic acid mediated signaling pathway // abscisic acid mediated signaling pathway // glucosinolate biosynthetic process // regulation of protein serine/threonine phosphatase activity
AT3G60650			1.0626	6.64e-05	biological_process
AT5G35926		Protein with RNI-like/FBD-like domains	1.06138	4.25e-06	biological_process
AT1G49940			1.05928	4.89e-05	biological_process
AT1G28670	ARAB-1	GDSL-like Lipase/Acylhydrolase superfamily protein	1.0569	0.000125424	lipid metabolic process
AT1G35040			1.05648	0.000210373	biological_process
AT4G21830	MSRB7	methionine sulfoxide reductase B7	1.05458	0.00197825	response to singlet oxygen // oxidation-reduction process
AT1G80960		F-box and Leucine Rich Repeat domains containing protein	1.04736	3.08e-05	biological_process
AT5G09520	PELPK2	hydroxyproline-rich glycoprotein family protein	1.04336	0.00592644	biological_process
AT3G47130		F-box associated ubiquitination effector family protein	1.04319	0.00105386	biological_process
AT3G61380		Phosphatidylinositol N-acetyglucosaminlytransferase subunit P-related	1.03921	1.34e-05	biological_process
AT4G01220	MGP4	Nucleotide-diphospho-sugar transferase family protein	1.03865	2.43e-05	rhamnogalacturonan II biosynthetic process // pollen tube development
AT1G52030	MBP2	myrosinase-binding protein 2	1.03732	0.000914274	defense response // cell adhesion // response to wounding // flower development
AT5G62800		Protein with RING/U-box and TRAF-like domains	1.03471	0.000178279	ubiquitin-dependent protein catabolic process // ubiquitin-dependent protein catabolic process // multicellular organismal development // multicellular organismal development // protein ubiquitination
AT5G27060	RLP53	receptor like protein 53	1.0313	0.00361169	defense response // signal transduction
AT3G17890			1.03037	3.66e-05	biological_process
AT4G12382		F-box family protein	1.02921	9.46e-05	biological_process
AT2G04680		Cysteine/Histidine-rich C1 domain family protein	1.02816	4.46e-05	brassinosteroid biosynthetic process // root hair cell differentiation // oxidation-reduction process
AT5G49860		Mannose-binding lectin superfamily protein	1.01794	0.000303816	biological_process
AT2G02680		Cysteine/Histidine-rich C1 domain family protein	1.01746	0.000254763	intracellular signal transduction // oxidation-reduction process
AT5G57240	ORP4C	OSBP(oxysterol binding protein)-related protein 4C	1.01357	2.09e-05	steroid metabolic process
AT2G24390		AIG2-like (avirulence induced gene) family protein	1.01225	1.82e-05	biological_process
AT1G72890		Disease resistance protein (TIR-NBS class)	1.01215	7.36e-06	autophagy // defense response // defense response // signal transduction
AT4G19450		Major facilitator superfamily protein	1.00958	7.31e-06	biological_process
AT3G11395		pre-tRNA	1.00671	0.00366234	---
AT2G17043			1.00387	0.000335816	biological_process
AT1G57850		Toll-Interleukin-Resistance (TIR) domain family protein	0.993507	0.00317389	defense response // signal transduction
AT4G01460		basic helix-loop-helix (bHLH) DNA-binding superfamily protein	0.993108	0.00062441	regulation of transcription, DNA-dependent
AT1G66060		Family of unknown function (DUF577)	0.992185	0.00733071	biological_process
AT5G27050	AGL101	AGAMOUS-like 101	0.990332	0.000827248	regulation of transcription, DNA-dependent
AT5G28720			0.986844	0.00667422	biological_process
AT2G12400			0.986636	0.000416637	biological_process
AT5G24780	VSP1	vegetative storage protein 1	0.986141	0.0018149	defense response // response to jasmonic acid stimulus // response to jasmonic acid stimulus
AT1G53690		DNA directed RNA polymerase, 7 kDa subunit	0.983825	0.00780237	transcription, DNA-dependent // transcription, DNA-dependent // pollen tube growth
AT5G38150	PMI15	Plant protein of unknown function (DUF827)	0.972423	0.000300893	response to blue light // chloroplast avoidance movement
AT5G27080	CDC20.3	Transducin family protein / WD-40 repeat family protein	0.971235	0.00283076	signal transduction
AT3G48270	CYP71A26	cytochrome P450, family 71, subfamily A, polypeptide 26	0.970228	0.00102881	oxidation-reduction process
AT5G54148			0.9679	0.00228364	---
AT1G31390		TRAF-like family protein	0.967824	0.00285489	biological_process
AT3G17280		F-box and associated interaction domains-containing protein	0.967685	1.2e-05	sister chromatid cohesion // reciprocal meiotic recombination // biological_process // regulation of chromosome organization // meiotic DNA double-strand break formation // meiotic chromosome segregation
AT3G45093		Defensin-like (DEFL) family protein	0.967542	0.000321286	---
AT5G46650		RING/U-box superfamily protein	0.96653	0.000111422	---
AT4G02360		Protein of unknown function, DUF538	0.966376	0.00226442	biological_process
AT3G55900		F-box family protein	0.964375	0.00225846	biological_process
AT3G23100	XRCC4	homolog of human DNA ligase iv-binding protein XRCC4	0.960229	0.00187874	double-strand break repair // DNA recombination // metabolic process
AT5G23940	PEL3	HXXXD-type acyl-transferase family protein	0.959464	0.00336327	embryo development ending in seed dormancy // trichome morphogenesis // cutin biosynthetic process // epidermis morphogenesis // localization
AT1G61840		Cysteine/Histidine-rich C1 domain family protein	0.957722	1.03e-05	intracellular signal transduction // oxidation-reduction process
AT5G03406		Class II aaRS and biotin synthetases superfamily protein	0.956491	0.000333793	tRNA aminoacylation for protein translation // histidyl-tRNA aminoacylation
AT5G38390		F-box/RNI-like superfamily protein	0.951377	0.000476213	biological_process
AT1G72870		Disease resistance protein (TIR-NBS class)	0.949171	1.64e-06	defense response // defense response // signal transduction
AT3G13404			0.947435	0.00506974	biological_process
AT3G26922		F-box/RNI-like superfamily protein	0.947178	3e-05	biological_process
AT4G29710		Alkaline-phosphatase-like family protein	0.946949	0.000108596	metabolic process
AT5G36540		ECA1 gametogenesis related family protein	0.946463	7.11e-05	---
AT4G14695		Uncharacterised protein family (UPF0041)	0.945976	0.000988966	biological_process
AT2G14378		Protein of unknown function (DUF1278)	0.944507	0.00300828	---
AT1G27160		valyl-tRNA synthetase / valine--tRNA ligase-related	0.942932	0.00016269	tRNA aminoacylation for protein translation // valyl-tRNA aminoacylation
AT5G20740		Plant invertase/pectin methylesterase inhibitor superfamily protein	0.941696	0.00194752	---
AT1G34800		Plant thionin family protein	0.940889	0.000690735	---
AT5G63087		Plant thionin family protein	0.93904	0.000573588	---
AT5G44550		Uncharacterised protein family (UPF0497)	0.936855	5.67e-05	biological_process
AT4G36580		AAA-type ATPase family protein	0.93357	0.00182182	pyrimidine ribonucleotide biosynthetic process // embryo sac egg cell differentiation
AT1G52400	BGLU18	beta glucosidase 18	0.933512	0.00477728	carbohydrate metabolic process // response to water deprivation // response to abiotic stimulus // response to salt stress // abscisic acid metabolic process // response to abscisic acid stimulus // positive regulation of abscisic acid mediated signaling pathway // regulation of stomatal movement // water homeostasis // defense response to fungus // protein polymerization
AT5G60440	AGL62	AGAMOUS-like 62	0.930893	6.12e-05	endosperm development
AT2G27010	CYP705A9	cytochrome P450, family 705, subfamily A, polypeptide 9	0.930322	0.000354215	oxidation-reduction process
AT1G60983	SCRL8	SCR-like 8	0.927924	0.00196837	signal transduction
AT2G04910		Carbohydrate-binding X8 domain superfamily protein	0.926674	0.000292288	biological_process
AT1G59920		MADS-box family protein	0.923809	0.000951381	biological_process
AT5G55770		Cysteine/Histidine-rich C1 domain family protein	0.918092	9.38e-05	oxidation-reduction process
AT4G11550		Cysteine/Histidine-rich C1 domain family protein	0.917706	2.71e-05	intracellular signal transduction // oxidation-reduction process
AT4G12390	PME1	pectin methylesterase inhibitor 1	0.917683	0.00268922	response to nitrate // nitrate transport
AT5G62920	ARR6	response regulator 6	0.916801	0.00566736	two-component signal transduction system (phosphorelay) // two-component signal transduction system (phosphorelay) // regulation of transcription, DNA-dependent // regulation of transcription, DNA-dependent // circadian rhythm // response to cytokinin stimulus // cytokinin mediated signaling pathway // cytokinin mediated signaling pathway // cytokinin mediated signaling pathway
AT1G30160		Protein of unknown function (DUF295)	0.915392	2.36e-06	biological_process
AT3G16851			0.914312	0.00664637	---
AT4G12430	TPPF	Haloacid dehalogenase-like hydrolase (HAD) superfamily protein	0.911226	0.00264036	trehalose biosynthetic process // trehalose biosynthetic process // metabolic process
AT1G31400		TRAF-like family protein	0.909358	0.000131086	biological_process
AT2G05380	GRP3S	glycine-rich protein 3 short isoform	0.90799	0.000740847	biological_process // indoleacetic acid biosynthetic process // cysteine biosynthetic process // glucosinolate biosynthetic process
AT1G51900		Regulator of Vps4 activity in the MVB pathway protein	0.905456	0.000200197	biological_process
AT3G16390	NSP3	nitrile specifier protein 3	0.905188	9.47e-05	glucosinolate catabolic process // glucosinolate catabolic process // nitrile biosynthetic process // nitrile biosynthetic process
AT1G01130			0.904302	0.000457283	biological_process
AT2G13125			0.903929	0.0088663	biological_process
AT5G25880	NADP-ME3	NADP-malic enzyme 3	0.903529	1.06e-05	gluconeogenesis // malate metabolic process // malate metabolic process // malate metabolic process // cytoskeleton organization // plant-type cell wall modification // pollen tube growth // proteasomal protein catabolic process // protein homooligomerization // oxidation-reduction process
AT3G28918			0.902177	0.00396885	---
AT1G29460		SAUR-like auxin-responsive protein family	0.901065	0.00208149	response to auxin stimulus
AT3G13540	MYB5	myb domain protein 5	0.901011	9.02e-05	regulation of transcription, DNA-dependent // seed germination // trichome differentiation // trichome morphogenesis // seed coat development // regulation of gene expression // mucilage biosynthetic process involved in seed coat development
AT2G02850	ARPN	plantacyanin	0.899959	0.00128527	photomorphogenesis // response to abscisic acid stimulus // embryo development ending in seed dormancy // seed germination // pollination // regulation of flower development // meristem structural organization // seed dormancy process // sugar mediated signaling pathway // vegetative to reproductive phase transition of meristem // protein ubiquitination // lipid storage // anther development // r…
AT2G35950	EDA12	embryo sac development arrest 12	0.896669	0.00202528	megagametogenesis
AT5G16340		AMP-dependent synthetase and ligase family protein	0.896546	3.71e-05	metabolic process
AT4G31136			0.896392	0.00677429	biological_process
AT5G23270	STP11	sugar transporter 11	0.893057	0.000115969	transport // transmembrane transport
AT4G09490		Polynucleotidyl transferase, ribonuclease H-like superfamily protein	0.889359	0.000592424	---
AT3G10190		Calcium-binding EF-hand family protein	0.888196	0.00549469	biological_process
AT2G17920		nucleic acid binding;zinc ion binding	0.886585	8.18e-05	biological_process
AT3G57072			0.88575	0.00176611	biological_process
AT2G08986			0.885275	0.00325927	biological_process
AT4G13610	MEE57	DNA (cytosine-5-)-methyltransferase family protein	0.883272	0.00246376	DNA methylation // DNA methylation // chromatin assembly or disassembly // embryo development ending in seed dormancy // C-5 methylation of cytosine
AT2G40380	PRA1.B2	prenylated RAB acceptor 1.B2	0.88276	0.000110027	vesicle-mediated transport
AT1G65210		Galactose-binding protein	0.882705	0.000160391	biological_process
AT2G07739		Ycf1 protein	0.882031	0.000728503	biological_process
AT1G09665		Toll-Interleukin-Resistance (TIR) domain family protein	0.880187	0.000436331	#N/A
AT3G03850		SAUR-like auxin-responsive protein family	0.879625	0.0014769	response to auxin stimulus
AT1G50055	TAS1B	TAS1B; other RNA	0.877636	5.16e-05	---
AT3G48090	EDS1	alpha/beta-Hydrolases superfamily protein	0.874778	0.00614051	MAPK cascade // response to singlet oxygen // response to hypoxia // response to hypoxia // respiratory burst involved in defense response // regulation of response to biotic stimulus // regulation of transcription, DNA-dependent // protein targeting to membrane // lipid metabolic process // lipid metabolic process // cellular membrane fusion // defense response // detection of biotic stimulus //…
AT4G13100		RING/U-box superfamily protein	0.872136	0.00670036	---
AT5G19257			0.870697	0.00355982	biological_process
AT3G25570		Adenosylmethionine decarboxylase family protein	0.869853	0.000100753	spermine biosynthetic process // spermidine biosynthetic process
AT2G07290			0.868127	0.00246699	biological_process
AT1G33710		RNA-directed DNA polymerase (reverse transcriptase)-related family protein	0.864872	1.94e-05	biological_process
AT1G29770		Haloacid dehalogenase-like hydrolase (HAD) superfamily protein	0.86327	0.000208144	---
AT2G28210	ATACA2	alpha carbonic anhydrase 2	0.862011	0.000202076	one-carbon metabolic process // one-carbon metabolic process // response to ethylene stimulus // response to carbon dioxide
AT5G27606			0.856144	0.0021853	biological_process
AT4G00390		DNA-binding storekeeper protein-related transcriptional regulator	0.854562	0.00156731	regulation of transcription, DNA-dependent
AT1G21738			0.841787	0.00125433	---
AT5G54860		Major facilitator superfamily protein	0.84045	0.000363672	transport // systemic acquired resistance // salicylic acid biosynthetic process
AT3G29130			0.840237	5.94e-05	biological_process
AT5G36500		ECA1 gametogenesis related family protein	0.839072	0.000170715	---
AT3G57320			0.839001	3.58e-05	biological_process
AT3G18530		ARM repeat superfamily protein	0.838489	0.00168818	biological_process
AT3G50570		hydroxyproline-rich glycoprotein family protein	0.835674	0.00102454	biological_process
AT1G17020	SRG1	senescence-related gene 1	0.835646	0.00395141	response to abscisic acid stimulus // embryo development ending in seed dormancy // flavonoid biosynthetic process // cell wall modification involved in abscission // seed germination // seed dormancy process // organ senescence // organ senescence // oxidation-reduction process
AT5G03435		Ca2+dependent plant phosphoribosyltransferase family protein	0.835577	0.001037	biological_process
AT5G36657		ECA1 gametogenesis related family protein	0.833603	0.00177465	---
AT5G38386		F-box/RNI-like superfamily protein	0.833512	0.00268744	biological_process
AT5G39140			0.832501	0.00125165	biological_process
AT3G42475			0.831708	0.00891604	biological_process
AT2G11462			0.83163	0.00966045	biological_process
AT3G05975		Late embryogenesis abundant (LEA) hydroxyproline-rich glycoprotein family	0.826176	0.00908023	biological_process
AT4G19330		Galactose oxidase/kelch repeat superfamily protein	0.82449	0.00023221	biological_process // response to cold
AT5G43200		Zinc finger, C3HC4 type (RING finger) family protein	0.823855	0.00315182	---
AT4G02541			0.82326	0.000196291	biological_process
AT4G21065		Tetratricopeptide repeat (TPR)-like superfamily protein	0.821641	0.000578977	biological_process
AT5G25910	RLP52	receptor like protein 52	0.820603	0.00366022	response to molecule of bacterial origin // defense response // signal transduction // signal transduction // stomatal complex morphogenesis // response to chitin // stamen development // defense response to fungus
AT2G43870		Pectin lyase-like superfamily protein	0.820145	0.00152461	carbohydrate metabolic process // carbohydrate metabolic process
AT3G28880		Ankyrin repeat family protein	0.81916	0.00213358	biological_process
AT2G01990			0.818799	0.000157461	biological_process
AT5G38895		RING/U-box superfamily protein	0.817984	0.00492399	response to superoxide // N-terminal protein myristoylation // autophagy // response to salt stress // response to auxin stimulus // response to abscisic acid stimulus // response to carbohydrate stimulus // ethylene mediated signaling pathway // response to chitin // heat acclimation
AT5G26270			0.8153	0.00359812	biological_process
AT4G02660		Beige/BEACH domain ;WD domain, G-beta repeat protein	0.813363	0.00133105	signal transduction
AT1G36230			0.812951	0.00185165	biological_process
AT4G39675			0.809768	0.00508789	biological_process
AT5G58660		2-oxoglutarate (2OG) and Fe(II)-dependent oxygenase superfamily protein	0.805616	0.000320027	oxidation-reduction process
AT1G08560	SYP111	syntaxin of plants 111	0.805066	0.000422287	microtubule cytoskeleton organization // cytokinesis // cytokinesis by cell plate formation // acetyl-CoA metabolic process // intracellular protein transport // intracellular protein transport // cellular membrane fusion // cellular membrane fusion // cell proliferation // response to cyclopentenone // sterol biosynthetic process // vesicle-mediated transport // vesicle-mediated transport // spi…
AT4G33290		F-box and associated interaction domains-containing protein	0.805043	0.00249019	biological_process
AT1G08430	ATALMT1	aluminum-activated malate transporter 1	0.801025	0.000193898	#N/A
AT4G11745		Galactose oxidase/kelch repeat superfamily protein	0.799788	0.00762068	biological_process
AT5G43400		Uncharacterised conserved protein UCP015417, vWA	0.799345	0.00244807	biological_process
AT4G22390		F-box associated ubiquitination effector family protein	0.798426	0.00110059	biological_process
AT3G49830		P-loop containing nucleoside triphosphate hydrolases superfamily protein	0.794792	6.75e-05	sister chromatid cohesion // reciprocal meiotic recombination // regulation of chromosome organization // meiotic DNA double-strand break formation // meiotic chromosome segregation
AT5G28781			0.791426	0.0072174	biological_process
AT3G43470		zinc ion binding;nucleic acid binding	0.787444	0.00171739	biological_process
AT1G49860	GSTF14	glutathione S-transferase (class phi) 14	0.786857	0.000729176	response to hypoxia // toxin catabolic process // toxin catabolic process // systemic acquired resistance, salicylic acid mediated signaling pathway // regulation of hydrogen peroxide metabolic process // response to cyclopentenone // inorganic anion transport // lateral root development // developmental growth // root hair cell differentiation
AT2G11623		Plant protein 1589 of unknown function	0.785977	0.00408696	biological_process
AT5G03795		Exostosin family protein	0.785464	3.79e-05	---
AT4G24265			0.784576	0.00278346	biological_process
AT3G47380		Plant invertase/pectin methylesterase inhibitor superfamily protein	0.78394	0.00288116	MAPK cascade // regulation of response to biotic stimulus // protein targeting to membrane // detection of biotic stimulus // salicylic acid biosynthetic process // systemic acquired resistance, salicylic acid mediated signaling pathway // jasmonic acid mediated signaling pathway // response to chitin // regulation of hydrogen peroxide metabolic process // regulation of plant-type hypersensitive …
AT3G59220	PRN1	pirin	0.781072	0.00633027	iron ion transport // response to abscisic acid stimulus // abscisic acid mediated signaling pathway // blue light signaling pathway // cellular response to iron ion starvation // response to nitrate // response to low fluence blue light stimulus by blue low-fluence system // nitrate transport
AT1G15080	LPP2	lipid phosphate phosphatase 2	0.780303	0.00824673	abscisic acid mediated signaling pathway
AT3G12110	ACT11	actin-11	0.778128	0.000327969	gluconeogenesis // cytoskeleton organization // proteasomal protein catabolic process // actin cytoskeleton organization
AT3G43431			0.777382	2.26e-05	---
AT2G17270	PHT3;3	phosphate transporter 3;3	0.775668	0.00166201	transport
AT5G62165	FYF	AGAMOUS-like 42	0.771831	0.00193997	regulation of transcription, DNA-dependent // regulation of transcription, DNA-dependent // abscission // regulation of flower development // vernalization response // leaf senescence // anthocyanin accumulation in tissues in response to UV light // carpel development // ovule development // floral organ senescence
AT5G49310	IMPA-5	importin alpha isoform 5	0.770834	0.00351401	protein import into nucleus // intracellular protein transport // toxin catabolic process
AT4G18680			0.76658	0.00390268	biological_process
AT5G03545	ATIPS2		0.764739	0.00677029	biological_process // cellular response to phosphate starvation // galactolipid biosynthetic process // negative regulation of transcription, DNA-dependent
AT2G11626			0.761765	0.00134495	biological_process
AT2G02498			0.761449	0.00652454	biological_process
AT2G38430			0.7595	0.000427649	biological_process
AT1G03220		Eukaryotic aspartyl protease family protein	0.759424	0.000205159	#N/A
AT1G17300			0.759015	0.000335134	biological_process
AT1G79840	GL2	HD-ZIP IV family of homeobox-leucine zipper protein with lipid-binding START domain	0.758189	4.45e-05	regulation of transcription, DNA-dependent // regulation of transcription, DNA-dependent // tissue development // epidermal cell fate specification // negative regulation of trichoblast fate specification // cell differentiation
AT3G61840		Protein of unknown function (DUF688)	0.756541	0.00140353	biological_process
AT5G39220		alpha/beta-Hydrolases superfamily protein	0.756324	0.00139827	---
AT5G55240	ATPXG2	ARABIDOPSIS THALIANA PEROXYGENASE 2	0.753142	0.00123928	defense response // oxylipin biosynthetic process
AT4G30830		Protein of unknown function, DUF593	0.752319	0.000319537	biological_process
AT3G29300			0.748469	0.00435115	biological_process
AT2G30910	ARPC1A	actin-related protein C1A	0.747734	0.00150228	actin filament organization // regulation of actin filament polymerization
AT1G27940	PGP13	P-glycoprotein 13	0.745375	0.00515209	ATP catabolic process // transport // vernalization response // auxin efflux // basipetal auxin transport // acropetal auxin transport // anthocyanin accumulation in tissues in response to UV light // carpel development // transmembrane transport // transmembrane transport
AT5G65530		Protein kinase superfamily protein	0.745179	0.00216209	protein phosphorylation // protein autophosphorylation
AT4G02655			0.744575	0.00770967	biological_process
AT3G50220	IRX15	Protein of unknown function (DUF579)	0.743303	0.0012385	secondary cell wall biogenesis // glucuronoxylan metabolic process // xylan biosynthetic process // xylan biosynthetic process
AT1G31720		Protein of unknown function (DUF1218)	0.743247	0.000990886	biological_process
AT3G16380	PAB6	poly(A) binding protein 6	0.742955	0.0011177	translational initiation // mRNA metabolic process
AT3G31401			0.741958	0.000782956	biological_process
AT3G60660			0.738346	0.000939512	DNA-dependent DNA replication // biological_process
AT4G00270		DNA-binding storekeeper protein-related transcriptional regulator	0.736636	4.13e-05	regulation of transcription, DNA-dependent // biological_process
AT5G60230	SEN2	splicing endonuclease 2	0.736366	0.000530743	tRNA splicing, via endonucleolytic cleavage and ligation // tRNA splicing, via endonucleolytic cleavage and ligation
AT3G50350		Protein of unknown function (DUF1685)	0.735487	0.00519813	biological_process
AT5G66170	STR18	sulfurtransferase 18	0.733963	0.0100842	aging
AT3G44700		Plant protein of unknown function	0.73317	0.0017349	biological_process
AT5G28780		PIF1 helicase	0.729605	0.000428736	biological_process
AT1G12750	RBL6	RHOMBOID-like protein 6	0.72838	0.000760826	proteolysis // biological_process
AT5G42905		Polynucleotidyl transferase, ribonuclease H-like superfamily protein	0.727428	0.00129791	---
AT1G67760		TCP-1/cpn60 chaperonin family protein	0.727124	0.00128758	protein folding // cellular protein metabolic process
AT3G52550			0.726307	0.00985525	biological_process
AT1G13430	ST4C	sulfotransferase 4C	0.725923	0.00990299	response to cytokinin stimulus
AT5G44582			0.723355	0.00853129	biological_process
AT2G04080		MATE efflux family protein	0.720842	0.000982977	drug transmembrane transport // transmembrane transport
AT2G29480	GSTU2	glutathione S-transferase tau 2	0.714846	0.000402194	toxin catabolic process // toxin catabolic process // response to zinc ion // response to cyclopentenone
AT3G10200		S-adenosyl-L-methionine-dependent methyltransferases superfamily protein	0.713222	0.00276893	---
AT3G05140	RBK2	ROP binding protein kinases 2	0.712414	0.00109914	protein phosphorylation
AT5G44572			0.711618	0.00324805	biological_process
AT2G18260	SYP112	syntaxin of plants 112	0.708101	0.00346356	intracellular protein transport // intracellular protein transport // cellular membrane fusion // cellular membrane fusion // response to cold // vesicle-mediated transport
AT4G27220		NB-ARC domain-containing disease resistance protein	0.707662	0.00110316	defense response // defense response
AT5G50560		Protein of unknown function (DUF 3339)	0.706669	0.00129192	biological_process
AT5G37320		Protein of unknown function (DUF674)	0.705834	0.00143177	biological_process
AT3G12970			0.703353	0.00149218	biological_process
AT4G10695		CDC68-related	0.701851	0.000178303	biological_process
AT3G28600		P-loop containing nucleoside triphosphate hydrolases superfamily protein	0.701147	0.00657948	---
AT5G36300		Tetratricopeptide repeat (TPR)-like superfamily protein	0.699396	0.00466607	biological_process
AT4G01930		Cysteine/Histidine-rich C1 domain family protein	0.696349	0.000273015	intracellular signal transduction // oxidation-reduction process
AT4G09260			0.696125	0.000381212	biological_process
AT3G54250		GHMP kinase family protein	0.696105	0.000789494	isoprenoid biosynthetic process // sterol biosynthetic process // pentacyclic triterpenoid biosynthetic process
AT5G01560	LECRKA4.3	lectin receptor kinase a4.3	0.695221	0.000102199	protein phosphorylation // abscisic acid mediated signaling pathway // seed germination
AT5G37430		Family of unknown function (DUF577)	0.692928	0.00967655	biological_process
AT5G43525		Putative membrane lipoprotein	0.691715	0.00924971	---
AT4G14870	SECE1	secE/sec61-gamma protein transport protein	0.687184	0.000629508	protein targeting // intracellular protein transport // protein secretion // thylakoid membrane organization
AT5G13210		Uncharacterised conserved protein UCP015417, vWA	0.685434	0.00522769	---
AT3G60020	SK5	SKP1-like 5	0.68508	0.00627668	ubiquitin-dependent protein catabolic process
AT5G53650			0.684202	0.000601936	protein targeting to mitochondrion // biological_process // fatty acid catabolic process
AT1G17350		NADH:ubiquinone oxidoreductase intermediate-associated protein 30	0.683191	0.00015453	biological_process // cytokinin mediated signaling pathway
AT2G26820	PP2-A3	phloem protein 2-A3	0.678909	0.00292641	iron ion transport // endocytosis // response to bacterium // cellular response to iron ion starvation // response to nitrate // nitrate transport
AT2G40955			0.678017	0.00214703	biological_process
AT1G62085		Mitochondrial transcription termination factor family protein	0.677146	0.00021852	biological_process
AT4G20050	QRT3	Pectin lyase-like superfamily protein	0.673326	0.000830177	microsporogenesis // plant-type cell wall modification // pollen tube growth // pollen exine formation // pollen exine formation
AT3G27910		Galactose oxidase/kelch repeat superfamily protein	0.673276	0.00245094	biological_process
AT3G44480	RPP1	Disease resistance protein (TIR-NBS-LRR class) family	0.671255	0.000904298	response to oomycetes // defense response // defense response // defense response // signal transduction // defense response to fungus, incompatible interaction // defense response to fungus, incompatible interaction
AT3G43580		Beta-galactosidase related protein	0.670647	0.000466099	carbohydrate metabolic process
AT2G05645			0.66774	0.00721489	biological_process
AT4G22285		Ubiquitin C-terminal hydrolases superfamily protein	0.665357	0.000517752	ubiquitin-dependent protein catabolic process
AT4G39360			0.664763	0.00283498	biological_process
AT1G29620		Cytochrome C oxidase polypeptide VIB family protein	0.662725	0.00132142	---
AT4G05310		Ubiquitin-like superfamily protein	0.659601	0.00311256	nucleotide-excision repair
AT3G44590		60S acidic ribosomal protein family	0.658341	0.00024222	RNA methylation // translational elongation // translational elongation
AT5G25780	EIF3B-2	eukaryotic translation initiation factor 3B-2	0.657943	0.000340556	translational initiation
AT5G43980	PDLP1A	plasmodesmata-located protein 1	0.654208	0.000501865	plasmodesmata-mediated intercellular transport // spread of virus in host
AT1G63560		Receptor-like protein kinase-related family protein	0.653834	0.00329482	biological_process
AT5G65350	HTR11	histone 3 11	0.652304	0.00629624	nucleosome assembly
AT5G02350		Cysteine/Histidine-rich C1 domain family protein	0.648604	0.00162007	oxidation-reduction process
AT5G47440		Plant protein of unknown function (DUF828) with plant pleckstrin homology-like region	0.64794	0.000353204	signal transduction
AT1G26510		F-box associated ubiquitination effector family protein	0.647828	0.00951112	biological_process
AT3G58340		TRAF-like family protein	0.647778	0.00144265	biological_process
AT3G50840		Phototropic-responsive NPH3 family protein	0.645143	0.00423504	---
AT2G34060		Peroxidase superfamily protein	0.644563	0.00104164	response to oxidative stress // oxidation-reduction process
AT1G29210		pre-tRNA	0.643878	0.00588604	---
AT1G21529			0.643304	0.00100178	---
AT2G07110			0.639933	0.00666987	biological_process
AT1G67600		Acid phosphatase/vanadium-dependent haloperoxidase-related protein	0.635455	0.00224821	biological_process // cellular response to phosphate starvation // galactolipid biosynthetic process // negative regulation of transcription, DNA-dependent
AT2G41800		Protein of unknown function, DUF642	0.632782	0.0100264	biological_process
AT1G61353			0.62747	0.00303925	---
AT3G59000		F-box/RNI-like superfamily protein	0.627321	0.00248279	biological_process
AT4G18900		Transducin/WD40 repeat-like superfamily protein	0.62581	0.00230505	biological_process
AT5G06720	PA2	peroxidase 2	0.62569	0.00167984	defense response to nematode // response to oxidative stress // flower development // oxidation-reduction process
AT1G35183			0.625424	0.0050959	biological_process
AT3G44680	HDA9	histone deacetylase 9	0.623277	0.00217996	histone deacetylation // histone deacetylation
AT1G30840	PUP4	purine permease 4	0.620791	0.0101826	purine base transport // purine base transport
AT4G01200		Calcium-dependent lipid-binding (CaLB domain) family protein	0.619328	0.000717271	biological_process
AT4G23432			0.617784	0.00210446	biological_process
AT2G24762	GDU4	glutamine dumper 4	0.617471	0.00588339	regulation of amino acid export
AT4G08176			0.616543	0.00995031	biological_process
AT2G19230		Leucine-rich repeat transmembrane protein kinase protein	0.61414	0.00300956	protein phosphorylation
AT5G42780	ZHD13	homeobox protein 27	0.614097	0.000884674	---
AT1G03230		Eukaryotic aspartyl protease family protein	0.613944	0.000816923	#N/A
AT1G19460		Galactose oxidase/kelch repeat superfamily protein	0.613834	0.000830468	biological_process
AT4G27590		Heavy metal transport/detoxification superfamily protein	0.613129	0.00507603	copper ion transport // metal ion transport
AT1G66280	BGLU22	Glycosyl hydrolase superfamily protein	0.609926	0.00508778	carbohydrate metabolic process // response to salt stress // cellular response to cold // cellular response to salt stress
AT1G34792		Plant thionin family protein	0.609182	0.00676902	---
AT2G15050	LTP7	lipid transfer protein	0.600025	0.00842453	lipid transport // lipid transport
AT3G45430		Concanavalin A-like lectin protein kinase family protein	0.59871	0.00508231	protein phosphorylation
AT4G24975		Plant self-incompatibility protein S1 family	0.598415	0.00168008	biological_process
AT2G14285		Small nuclear ribonucleoprotein family protein	0.597818	0.000573178	RNA processing // biological_process
AT5G25000			0.596409	0.00569404	biological_process
AT1G06630		F-box/RNI-like superfamily protein	0.591862	0.00126099	#N/A
AT1G53935			0.59085	0.00664868	biological_process
AT3G58193		snoRNA	0.589438	0.0063487	---
AT5G17740		P-loop containing nucleoside triphosphate hydrolases superfamily protein	0.588091	0.00315595	---
AT4G07786			0.587616	0.00553742	biological_process
AT5G66650		Protein of unknown function (DUF607)	-0.585026	3.53e-05	biological_process // response to chitin
AT1G02391			-0.585031	0.0094174	biological_process
AT1G17060	SOB7	cytochrome p450 72c1	-0.585247	0.00981259	response to light stimulus // unidimensional cell growth // brassinosteroid metabolic process // brassinosteroid biosynthetic process // oxidation-reduction process
AT4G18800	RABA1d	RAB GTPase homolog A1D	-0.585448	0.00134164	small GTPase mediated signal transduction // protein transport // vesicle-mediated transport
AT3G49900		Phototropic-responsive NPH3 family protein	-0.585542	0.000968349	response to light stimulus
AT3G15170	CUC1	NAC (No Apical Meristem) domain transcriptional regulator superfamily protein	-0.586277	0.00373784	regulation of transcription, DNA-dependent // embryo development // flower development // flower development // meristem initiation // meristem initiation // primary shoot apical meristem specification // specification of floral organ identity // formation of organ boundary // secondary shoot formation // carpel development // gynoecium development // meristem development // lateral root developm…
AT1G35530		DEAD/DEAH box RNA helicase family protein	-0.586425	0.00297212	DNA-dependent DNA replication
AT3G26490		Phototropic-responsive NPH3 family protein	-0.586457	0.00411505	response to light stimulus // response to light stimulus
AT5G40720		Domain of unknown function (DUF23)	-0.586637	0.00338148	biological_process
AT5G02740		Ribosomal protein S24e family protein	-0.587058	0.00016243	biological_process
AT2G03850		Late embryogenesis abundant protein (LEA) family protein	-0.587126	0.00088864	embryo development ending in seed dormancy
AT1G34460	CYCB1;5	CYCLIN B1;5	-0.587182	0.000399686	regulation of cell cycle
AT3G26100		Regulator of chromosome condensation (RCC1) family protein	-0.587668	2.94e-05	biological_process
AT1G32300		D-arabinono-1,4-lactone oxidase family protein	-0.587754	0.00272846	oxidation-reduction process
AT1G71960	ATABCG25	ATP-binding casette family G25	-0.58792	0.00107028	response to abscisic acid stimulus // abscisic acid transport
AT2G43320		S-adenosyl-L-methionine-dependent methyltransferases superfamily protein	-0.5886	8.57e-05	biological_process // response to water deprivation // response to chitin // hyperosmotic salinity response
AT1G09794		Cox19 family protein (CHCH motif)	-0.588812	0.00303935	#N/A
AT4G23470		PLAC8 family protein	-0.588905	0.000124068	response to osmotic stress // salicylic acid biosynthetic process // salicylic acid mediated signaling pathway // response to nitrate // nitrate transport // negative regulation of defense response // innate immune response // response to cadmium ion // root hair elongation
AT3G18235			-0.589049	0.00490871	biological_process
AT1G15310	SRP54-1	signal recognition particle 54 kDa subunit	-0.589323	0.00805077	SRP-dependent cotranslational protein targeting to membrane // SRP-dependent cotranslational protein targeting to membrane, signal sequence recognition // production of ta-siRNAs involved in RNA interference // production of miRNAs involved in gene silencing by miRNA // defense response to virus
AT5G22380	NAC090	NAC domain containing protein 90	-0.589732	0.00254152	regulation of transcription, DNA-dependent // multicellular organismal development
AT3G09190		Concanavalin A-like lectin family protein	-0.59077	0.00235461	photoperiodism, flowering
AT3G53940		Mitochondrial substrate carrier family protein	-0.59083	0.00801885	transport // transport // mitochondrial transport // pyrimidine ribonucleotide biosynthetic process // transmembrane transport
AT1G12630		Integrase-type DNA-binding superfamily protein	-0.591199	0.00164525	#N/A
AT1G63640		P-loop nucleoside triphosphate hydrolases superfamily protein with CH (Calponin Homology) domain	-0.59123	6.01e-05	microtubule cytoskeleton organization // cytokinesis by cell plate formation // DNA methylation // chromatin silencing // methylation-dependent chromatin silencing // microtubule-based movement // cell-cell signaling // virus induced gene silencing // regulation of flower development // production of ta-siRNAs involved in RNA interference // gene silencing // histone modification // histone phosp…
AT3G47200		Plant protein of unknown function (DUF247)	-0.591239	0.00323335	biological_process
AT5G17780		alpha/beta-Hydrolases superfamily protein	-0.59179	0.00728789	---
AT5G08790	ATAF2	NAC (No Apical Meristem) domain transcriptional regulator superfamily protein	-0.592023	0.00531654	regulation of transcription, DNA-dependent // multicellular organismal development // regulation of cell size // response to light stimulus // response to wounding // response to fungus // response to sucrose stimulus // response to salicylic acid stimulus // response to jasmonic acid stimulus
AT5G12280		SWAP (Suppressor-of-White-APricot)/surp RNA-binding domain-containing protein	-0.592245	0.000732362	RNA processing
AT2G31870	TEJ	Poly (ADP-ribose) glycohydrolase (PARG)	-0.592465	0.00129032	carbohydrate metabolic process // response to osmotic stress // response to oxidative stress // response to water deprivation // defense response to fungus // stomatal closure
AT4G36220	FAH1	ferulic acid 5-hydroxylase 1	-0.592688	0.0062052	phenylpropanoid biosynthetic process // lignin biosynthetic process // lignin biosynthetic process // response to UV-B // oxidation-reduction process
AT3G44540	FAR4	fatty acid reductase 4	-0.593003	0.000459736	microsporogenesis // response to wounding // response to salt stress // suberin biosynthetic process // oxidation-reduction process
AT2G22610		Di-glucose binding protein with Kinesin motor domain	-0.593055	0.000345502	microtubule cytoskeleton organization // cytokinesis by cell plate formation // DNA methylation // chromatin silencing // microtubule-based movement // regulation of flower development // gene silencing // histone modification // histone phosphorylation // cell cycle process // gene silencing by RNA // histone lysine methylation // floral organ formation // petal formation // sepal formation // a…
AT1G17920	HDG12	homeodomain GLABROUS 12	-0.593153	0.000506651	double-strand break repair via homologous recombination // regulation of transcription, DNA-dependent // regulation of transcription, DNA-dependent // trichome branching // heterochromatin assembly // positive regulation of cell cycle // petal formation // sepal formation
AT3G13432			-0.593175	0.00357413	biological_process
AT3G13900		ATPase E1-E2 type family protein / haloacid dehalogenase-like hydrolase family protein	-0.593222	0.00189477	cation transport // phospholipid transport
AT5G67530	PUB49	plant U-box 49	-0.593324	3.44e-06	protein folding // protein folding // protein ubiquitination
AT5G64410	OPT4	oligopeptide transporter 4	-0.593342	0.00570559	oligopeptide transport // oligopeptide transport // transmembrane transport // response to karrikin
AT2G46980			-0.593375	0.000884648	meiosis
AT2G41340	RPB5D	RNA polymerase II fifth largest subunit, D	-0.593479	0.008227	transcription, DNA-dependent // transcription, DNA-dependent
AT5G37560		RING/U-box superfamily protein	-0.593541	0.00070669	biological_process
AT5G24655	LSU4	response to low sulfur 4	-0.593766	0.00344128	biological_process
AT3G57670	WIP2	C2H2-type zinc finger family protein	-0.593813	0.0015327	regulation of transcription, DNA-dependent // plant-type cell wall modification // pollen tube growth // pollen tube growth // transmitting tissue development
AT3G12920	BRG3	SBP (S-ribonuclease binding protein) family protein	-0.593966	0.00159723	regulation of programmed cell death
AT5G08120	MPB2C	movement protein binding protein 2C	-0.594021	6.47e-05	response to water deprivation // stomatal complex patterning // plasmodesmata-mediated intercellular transport // cortical microtubule organization // defense response to virus
AT4G40042		Microsomal signal peptidase 12 kDa subunit (SPC12)	-0.594074	9.8e-05	signal peptide processing
AT5G07380			-0.594331	0.000716682	biological_process
AT4G14096		F-box/RNI-like superfamily protein	-0.59467	0.00563406	biological_process
AT2G40570		initiator tRNA phosphoribosyl transferase family protein	-0.594769	4.18e-05	regulation of translation // protein dephosphorylation
AT1G16630			-0.595961	0.000351612	---
AT2G25360		RING/U-box superfamily protein	-0.596877	0.00798584	---
AT1G65360	AGL23	AGAMOUS-like 23	-0.597272	0.00545236	embryo sac development // chloroplast organization
AT1G17615		Disease resistance protein (TIR-NBS class)	-0.597734	0.00197369	defense response // signal transduction
AT4G34330		Protein of unknown function (DUF677)	-0.597804	0.00158129	---
AT4G39640	GGT1	gamma-glutamyl transpeptidase 1	-0.597811	0.000110591	glutathione catabolic process // response to oxidative stress // response to oxidative stress // response to wounding // response to insect // systemic acquired resistance, salicylic acid mediated signaling pathway // negative regulation of defense response
AT3G01420	PADOX-1	Peroxidase superfamily protein	-0.598	0.00326705	fatty acid alpha-oxidation // lipid metabolic process // iron ion transport // response to oxidative stress // response to oxidative stress // cell death // response to salicylic acid stimulus // cell wall modification involved in abscission // cellular response to iron ion starvation // response to nitrate // nitrate transport // response to other organism // oxidation-reduction process
AT4G10000		Thioredoxin family protein	-0.59833	0.00128112	cell redox homeostasis
AT5G58350	ZIK2	with no lysine (K) kinase 4	-0.598649	0.00580198	protein phosphorylation // protein phosphorylation // organ senescence // cellular response to phosphate starvation // galactolipid biosynthetic process // cellular response to water deprivation // protein autophosphorylation
AT1G66553			-0.598944	0.000713788	---
AT1G19190		alpha/beta-Hydrolases superfamily protein	-0.599363	0.00170097	metabolic process
AT3G04480		endoribonucleases	-0.600073	0.000239467	---
AT4G35110		Arabidopsis phospholipase-like protein (PEARLI 4) family	-0.600728	0.00198469	amino acid import // response to karrikin
AT3G61035		Cytochrome P450 superfamily protein	-0.600937	0.000183123	oxidation-reduction process
AT1G79900	BAC2	Mitochondrial substrate carrier family protein	-0.600975	0.000467834	proline biosynthetic process // transport // transport // mitochondrial transport // hyperosmotic response // L-arginine import // transmembrane transport
AT3G45330		Concanavalin A-like lectin protein kinase family protein	-0.601192	0.000246498	protein phosphorylation
AT2G44980	ASG3	SNF2 domain-containing protein / helicase domain-containing protein	-0.602549	0.00486162	---
AT4G04925			-0.603692	0.000357031	biological_process
AT4G13710		Pectin lyase-like superfamily protein	-0.604301	0.00110708	biological_process
AT3G46290	HERK1	hercules receptor kinase 1	-0.605318	0.000222447	protein phosphorylation // response to brassinosteroid stimulus // brassinosteroid mediated signaling pathway // post-embryonic development // unidimensional cell growth // regulation of unidimensional cell growth // regulation of unidimensional cell growth
AT1G53660		nodulin MtN21 /EamA-like transporter family protein	-0.606498	8.87e-05	purine base transport
AT1G55120	FRUCT5	beta-fructofuranosidase 5	-0.606838	0.000626756	carbohydrate metabolic process
AT1G02145	EBS4	homolog of asparagine-linked glycosylation 12	-0.608204	5.32e-06	#N/A
AT1G26940		Cyclophilin-like peptidyl-prolyl cis-trans isomerase family protein	-0.60853	0.00018194	protein folding // protein folding
AT3G07522			-0.610103	0.00597515	---
AT5G20870		O-Glycosyl hydrolases family 17 protein	-0.611078	0.0022483	carbohydrate metabolic process
AT5G14980		alpha/beta-Hydrolases superfamily protein	-0.611805	0.000473291	---
AT5G05190		Protein of unknown function (DUF3133)	-0.6121	0.000385577	response to molecule of bacterial origin // respiratory burst involved in defense response // biological_process // response to chitin
AT3G54340	ATAP3	K-box region and MADS-box transcription factor family protein	-0.612567	0.0066594	regulation of transcription, DNA-dependent // plant-type cell wall modification // pollen tube growth // post-embryonic morphogenesis // regulation of flower development // specification of floral organ identity // carpel development // petal development // stamen development // ovule development // meristem development
AT3G50940		P-loop containing nucleoside triphosphate hydrolases superfamily protein	-0.61322	6.49e-06	---
AT1G49790		F-box associated ubiquitination effector family protein	-0.613345	4.05e-05	biological_process
AT4G26560	CBL7	calcineurin B-like protein 7	-0.613417	0.00808355	detection of calcium ion // calcium-mediated signaling
AT2G48010	RKF3	receptor-like kinase in in flowers 3	-0.613619	0.00770929	protein phosphorylation
AT2G33640		DHHC-type zinc finger family protein	-0.613822	0.00460233	regulation of flower development // histone modification // floral organ formation
AT3G07510			-0.614462	0.00182591	biological_process
AT1G01750	ADF11	actin depolymerizing factor 11	-0.614552	0.00113349	#N/A
AT1G51830		Leucine-rich repeat protein kinase family protein	-0.614933	0.00364086	protein phosphorylation // protein phosphorylation // iron ion transport // transmembrane receptor protein tyrosine kinase signaling pathway // cellular response to iron ion starvation // response to nitrate // nitrate transport
AT3G05550		Hypoxia-responsive family protein	-0.61554	0.00440513	response to hypoxia
AT1G27980	DPL1	dihydrosphingosine phosphate lyase	-0.615758	0.000897807	cellular amino acid metabolic process // fatty acid beta-oxidation // ER to Golgi vesicle-mediated transport // toxin catabolic process // carboxylic acid metabolic process // sphingolipid catabolic process // proteasomal ubiquitin-dependent protein catabolic process // response to misfolded protein // proteasome core complex assembly
AT1G04660		glycine-rich protein	-0.616019	0.000285378	biological_process
AT4G21200	GA2OX8	gibberellin 2-oxidase 8	-0.616079	0.00575292	gibberellin metabolic process // oxidation-reduction process
AT4G36740	HB40	homeobox protein 40	-0.61629	0.00134471	regulation of transcription, DNA-dependent // regulation of transcription, DNA-dependent // response to auxin stimulus
AT3G26080		plastid-lipid associated protein PAP / fibrillin family protein	-0.616598	0.00404162	biological_process
AT1G19340		Methyltransferase MT-A70 family protein	-0.616665	0.00246782	nucleobase-containing compound metabolic process // methylation
AT5G59180	NRPB7	DNA-directed RNA polymerase II	-0.617355	7.4e-06	RNA splicing, via endonucleolytic cleavage and ligation // transcription, DNA-dependent // transcription, DNA-dependent // transcription from RNA polymerase II promoter
AT1G75960		AMP-dependent synthetase and ligase family protein	-0.61756	0.00168811	metabolic process
AT3G60690		SAUR-like auxin-responsive protein family	-0.618905	0.000790425	response to auxin stimulus // systemic acquired resistance, salicylic acid mediated signaling pathway
AT5G08760			-0.618987	0.000287053	biological_process
AT4G24860		P-loop containing nucleoside triphosphate hydrolases superfamily protein	-0.618997	1.77e-05	---
AT3G02150	TFPD	plastid transcription factor 1	-0.619044	0.00784776	regulation of transcription, DNA-dependent // jasmonic acid metabolic process // response to jasmonic acid stimulus // leaf morphogenesis // cell differentiation // regulation of defense response // positive regulation of development, heterochronic // leaf development
AT3G05330	ATTAN	cyclin family	-0.619472	5.94e-05	microtubule cytoskeleton organization // cytokinesis by cell plate formation // phragmoplast assembly // cytokinesis, initiation of separation // histone phosphorylation // cell cycle process
AT3G01980		NAD(P)-binding Rossmann-fold superfamily protein	-0.619762	0.000618046	metabolic process
AT4G14110	FUS7	COP9 signalosome, subunit CSN8	-0.619775	9.75e-05	G2 phase of mitotic cell cycle // protein deneddylation // protein targeting to mitochondrion // response to light stimulus // photomorphogenesis // photomorphogenesis // response to jasmonic acid stimulus // signalosome assembly // cullin deneddylation // cullin deneddylation
AT3G17550		Haloacid dehalogenase-like hydrolase (HAD) superfamily protein	-0.619776	0.00397467	---
AT3G20410	CPK9	calmodulin-domain protein kinase 9	-0.619972	0.00232282	MAPK cascade // protein phosphorylation // protein phosphorylation // protein targeting to membrane // cell communication // signal transduction // response to cold // response to external stimulus // response to ethylene stimulus // abscisic acid mediated signaling pathway // systemic acquired resistance, salicylic acid mediated signaling pathway // jasmonic acid mediated signaling pathway // re…
AT4G13880	RLP48	receptor like protein 48	-0.62	0.0005572	signal transduction
AT5G38210		Protein kinase family protein	-0.620031	0.00376528	protein phosphorylation // response to bacterium // innate immune response // protein autophosphorylation
AT5G53205			-0.62019	0.000438496	---
AT1G14370	PBL2	protein kinase 2A	-0.620472	0.000768534	#N/A
AT4G38550		Arabidopsis phospholipase-like protein (PEARLI 4) family	-0.621405	0.00143174	protein targeting to membrane // systemic acquired resistance // positive regulation of flavonoid biosynthetic process // regulation of plant-type hypersensitive response // regulation of defense response
AT5G18190		Protein kinase family protein	-0.621654	3.34e-07	protein phosphorylation
AT1G60890		Phosphatidylinositol-4-phosphate 5-kinase family protein	-0.621831	0.00125785	phosphatidylinositol metabolic process
AT1G12420	ACR8	ACT domain repeat 8	-0.622107	8.82e-05	metabolic process // response to abscisic acid stimulus
AT1G14900	HMGA	high mobility group A	-0.622671	0.000582206	cell fate specification // nucleosome assembly // regulation of transcription, DNA-dependent // regulation of transcription, DNA-dependent // cell proliferation
AT2G44280		Major facilitator superfamily protein	-0.622694	0.000134341	biological_process
AT3G13882		Ribosomal protein L34	-0.623406	0.000438208	translation
AT5G09300		Thiamin diphosphate-binding fold (THDP-binding) superfamily protein	-0.623506	6.17e-05	metabolic process // metabolic process
AT2G27650		Ubiquitin carboxyl-terminal hydrolase-related protein	-0.624004	0.000239091	ubiquitin-dependent protein catabolic process
AT5G64980			-0.624297	0.000275971	biological_process
AT3G11750	FOLB1	Dihydroneopterin aldolase	-0.6246	0.00108473	folic acid-containing compound metabolic process // folic acid-containing compound metabolic process // PSII associated light-harvesting complex II catabolic process
AT1G11600	CYP77B1	cytochrome P450, family 77, subfamily B, polypeptide 1	-0.625314	0.000771907	#N/A
AT1G32940	SBT3.5	Subtilase family protein	-0.625454	0.000563502	proteolysis // proteolysis // metabolic process // cellular response to phosphate starvation // galactolipid biosynthetic process // cellular response to water deprivation // negative regulation of catalytic activity
AT3G23633		F-box associated ubiquitination effector family protein	-0.625466	0.00152794	biological_process
AT2G26970		Polynucleotidyl transferase, ribonuclease H-like superfamily protein	-0.625623	0.000208056	---
AT4G28405		Expressed protein	-0.625648	0.00016357	biological_process
AT3G27025			-0.625687	0.000489343	---
AT3G28810		Protein of unknown function (DUF1216)	-0.626027	0.00614805	biological_process
AT5G22355		Cysteine/Histidine-rich C1 domain family protein	-0.626112	0.00570894	intracellular signal transduction // oxidation-reduction process
AT3G02850	SKOR	STELAR K+ outward rectifier	-0.626269	0.00408433	ion transport // potassium ion transport // potassium ion transport // potassium ion transport // response to abscisic acid stimulus // response to chitin // defense response to fungus // transmembrane transport
AT2G26210		Ankyrin repeat family protein	-0.62637	0.000121012	biological_process
AT5G53060		RNA-binding KH domain-containing protein	-0.626839	8.08e-05	biological_process
AT3G07320		O-Glycosyl hydrolases family 17 protein	-0.626993	0.00807605	carbohydrate metabolic process
AT3G09480		Histone superfamily protein	-0.627313	0.00995529	nucleosome assembly
AT4G27580			-0.627434	0.000749352	biological_process
AT3G01590		Galactose mutarotase-like superfamily protein	-0.627516	6.5e-06	carbohydrate metabolic process // galactose metabolic process
AT1G64710		GroES-like zinc-binding dehydrogenase family protein	-0.627555	0.000150124	ethylene mediated signaling pathway // oxidation-reduction process
AT5G37140		P-loop containing nucleoside triphosphate hydrolases superfamily protein	-0.628093	0.00782316	---
AT3G27630			-0.628196	0.00349049	biological_process
AT1G04580	ATAO2	aldehyde oxidase 4	-0.628669	0.000214369	glucosinolate metabolic process // oxidation-reduction process
AT1G53543			-0.628803	0.000200128	---
AT1G71760			-0.628911	0.000487377	biological_process
AT4G16215			-0.62893	5.36e-06	biological_process
AT4G17720		RNA-binding (RRM/RBD/RNP motifs) family protein	-0.628997	9.49e-05	systemic acquired resistance // response to endoplasmic reticulum stress
AT1G48380	RHL1	root hair initiation protein root hairless 1 (RHL1)	-0.62927	0.000106172	regulation of transcription, DNA-dependent // RNA processing // response to xenobiotic stimulus // cell cycle process // DNA endoreduplication // post-translational protein modification // positive regulation of transcription, DNA-dependent // positive regulation of cellular process // root hair initiation
AT1G20480		AMP-dependent synthetase and ligase family protein	-0.629383	0.0058922	metabolic process // phenylpropanoid metabolic process
AT5G41130		Esterase/lipase/thioesterase family protein	-0.629425	0.000104596	metabolic process
AT2G07779			-0.629687	3.03e-05	biological_process
AT1G21928		Plant thionin family protein	-0.630169	0.00536099	---
AT4G26150	GNL	cytokinin-responsive gata factor 1	-0.63111	0.000251641	regulation of transcription, DNA-dependent // circadian rhythm // response to light stimulus // response to cytokinin stimulus // gibberellic acid mediated signaling pathway // negative regulation of flower development // negative regulation of seed germination // regulation of chlorophyll biosynthetic process // regulation of gene expression
AT2G23945		Eukaryotic aspartyl protease family protein	-0.631384	0.00212341	proteolysis
AT2G05120		Nucleoporin, Nup133/Nup155-like	-0.631475	0.000274333	embryo sac egg cell differentiation
AT1G69500	CYP704B1	cytochrome P450, family 704, subfamily B, polypeptide 1	-0.631616	0.00639533	pollen exine formation // pollen exine formation // oxidation-reduction process // sporopollenin biosynthetic process
AT4G02050	STP7	sugar transporter protein 7	-0.631945	0.00062569	transport // transmembrane transport
AT1G68872			-0.631947	0.000375627	---
AT4G04078			-0.632177	0.00296	biological_process
AT2G32487			-0.63266	0.00876003	biological_process
AT3G11680		Aluminium activated malate transporter family protein	-0.632785	0.00103282	response to aluminum ion
AT3G11920		glutaredoxin-related	-0.632798	0.000904892	intracellular signal transduction // cell redox homeostasis // anther development
AT1G55910	ZIP11	zinc transporter 11 precursor	-0.632808	0.00999508	cation transport // metal ion transport // transmembrane transport
AT1G66940		protein kinase-related	-0.632891	0.00986121	biological_process
AT3G45420		Concanavalin A-like lectin protein kinase family protein	-0.63309	0.00642623	protein phosphorylation
AT5G46230		Protein of unknown function, DUF538	-0.633139	0.00168096	biological_process
AT3G08760	ATSIK	Protein kinase superfamily protein	-0.633263	0.00719455	protein phosphorylation // autophagy
AT5G03550			-0.633466	7.18e-05	biological_process
AT1G63370		Flavin-binding monooxygenase family protein	-0.633806	0.00101792	oxidation-reduction process
AT3G54700	PHT1;7	phosphate transporter 1;7	-0.633932	0.00451792	phosphate ion transport // transmembrane transport
AT2G43465		RNA-binding ASCH domain protein	-0.634003	0.00284965	biological_process
AT2G26700	PID2	AGC (cAMP-dependent, cGMP-dependent and protein kinase C) kinase family protein	-0.634542	0.00287695	protein phosphorylation // protein phosphorylation // cotyledon development
AT4G37235		Uncharacterised protein family (UPF0497)	-0.634713	0.000181482	biological_process
AT5G60150			-0.635167	0.000152242	biological_process // petal formation // sepal formation
AT1G43260		hAT transposon superfamily protein	-0.635262	0.000587069	biological_process
AT5G10260	RABH1e	RAB GTPase homolog H1E	-0.635267	0.00564166	intra-Golgi vesicle-mediated transport // cellular membrane fusion // small GTPase mediated signal transduction // protein transport
AT2G02370		SNARE associated Golgi protein family	-0.635389	8.7e-05	biological_process
AT1G64385			-0.635689	6.34e-05	biological_process
AT4G39860			-0.636053	0.000208744	nuclear division // cytokinesis by cell plate formation // chromatin silencing // nucleolus organization // biological_process // cell proliferation // histone phosphorylation // histone H3-K9 methylation
AT5G66610	DAR7	DA1-related protein 7	-0.636209	0.00577627	---
AT2G29070		Ubiquitin fusion degradation UFD1 family protein	-0.636396	0.00301103	ubiquitin-dependent protein catabolic process // ubiquitin-dependent protein catabolic process
AT5G18120	ATAPRL7	APR-like 7	-0.636895	7.21e-05	cell redox homeostasis
AT5G28220		Protein prenylyltransferase superfamily protein	-0.637715	6.75e-05	biological_process
AT1G21245		Protein kinase superfamily protein	-0.637781	0.0021558	protein phosphorylation
AT2G01650	PUX2	plant UBX domain-containing protein 2	-0.638086	1.31e-06	N-terminal protein myristoylation // biological_process
AT1G76310	CYCB2;4	CYCLIN B2;4	-0.638115	0.00140018	regulation of cyclin-dependent protein kinase activity // DNA replication // DNA-dependent DNA replication initiation // regulation of DNA replication // DNA methylation // chromatin silencing // methylation-dependent chromatin silencing // cell proliferation // stomatal lineage progression // RNA interference // gene silencing by RNA // chromatin silencing by small RNA // histone H3-K9 methylati…
AT1G02800	CEL2	cellulase 2	-0.63813	0.00459597	carbohydrate metabolic process // pattern specification process // response to nematode // determination of bilateral symmetry // polarity specification of adaxial/abaxial axis // meristem initiation // xylem and phloem pattern formation // specification of floral organ identity // carpel development // meristem development
AT2G44410		RING/U-box superfamily protein	-0.638384	0.000115176	---
AT5G38340		Disease resistance protein (TIR-NBS-LRR class) family	-0.638416	0.00839264	defense response // defense response // signal transduction
AT1G71900		Protein of unknown function (DUF803)	-0.638933	9.87e-05	biological_process
AT1G75730			-0.639865	0.0044514	biological_process
AT5G62230	ERL1	ERECTA-like 1	-0.64022	0.00284558	cell fate specification // response to molecule of bacterial origin // protein phosphorylation // signal transduction // embryo sac development // plant-type cell wall modification // pollen tube growth // post-embryonic morphogenesis // regulation of flower development // leaf morphogenesis // stomatal complex morphogenesis // stomatal complex morphogenesis // petal development // stamen develop…
AT5G59530		2-oxoglutarate (2OG) and Fe(II)-dependent oxygenase superfamily protein	-0.6407	0.00197775	transition metal ion transport // toxin catabolic process // response to zinc ion // response to cyclopentenone // oxidation-reduction process
AT5G26290		TRAF-like family protein	-0.640763	0.00115501	biological_process
AT1G01690	PRD3	putative recombination initiation defects 3	-0.641008	0.000597378	#N/A
AT3G12545		Bifunctional inhibitor/lipid-transfer protein/seed storage 2S albumin superfamily protein	-0.641407	4.53e-07	biological_process
AT3G10780		emp24/gp25L/p24 family/GOLD family protein	-0.641933	0.00983253	transport // intracellular protein transport
AT1G73780		Bifunctional inhibitor/lipid-transfer protein/seed storage 2S albumin superfamily protein	-0.641936	0.00389057	lipid transport // lipid transport
AT4G10955		alpha/beta-Hydrolases superfamily protein	-0.642001	0.00103193	lipid metabolic process // lipid metabolic process
AT1G01260		basic helix-loop-helix (bHLH) DNA-binding superfamily protein	-0.642007	0.00026203	#N/A
AT5G27610	ATALY1	DIRP ;Myb-like DNA-binding domain	-0.642171	0.00192527	biological_process
AT2G01180	PAP1	phosphatidic acid phosphatase 1	-0.642206	0.000816213	phospholipid metabolic process // response to stress
AT5G39420	cdc2cAt	CDC2C	-0.642289	0.00692812	protein phosphorylation // pollen tube growth
AT1G50390		pfkB-like carbohydrate kinase family protein	-0.642672	0.000453707	---
AT4G37990	ELI3-2	elicitor-activated gene 3-2	-0.64283	0.00380213	amino acid transport // toxin catabolic process // response to bacterium // plant-type hypersensitive response // lignin biosynthetic process // response to cyclopentenone // oxidation-reduction process
AT1G29240		Protein of unknown function (DUF688)	-0.64297	0.00794617	biological_process
AT4G25160		U-box domain-containing protein kinase family protein	-0.643151	5.5e-05	response to molecule of fungal origin // protein phosphorylation // response to stress // protein ubiquitination
AT3G46920		Protein kinase superfamily protein with octicosapeptide/Phox/Bem1p domain	-0.643343	3.47e-06	protein phosphorylation // protein phosphorylation // response to high light intensity // response to hydrogen peroxide
AT3G52820	PAP22	purple acid phosphatase 22	-0.643608	0.00457903	cellular response to phosphate starvation // galactolipid biosynthetic process // negative regulation of transcription, DNA-dependent
AT5G61090		Polynucleotidyl transferase, ribonuclease H-like superfamily protein	-0.643852	0.00165973	biological_process
AT1G18270		ketose-bisphosphate aldolase class-II family protein	-0.643904	5.55e-05	carbohydrate metabolic process // glycolysis // pentose-phosphate shunt // valine metabolic process // oxidation-reduction process
AT4G31350		Core-2/I-branching beta-1,6-N-acetylglucosaminyltransferase family protein	-0.644475	5.15e-06	---
AT2G45695		Ubiquitin related modifier 1	-0.645033	1.85e-05	biological_process // tRNA thio-modification
AT3G49120	PRXCB	peroxidase CB	-0.645325	0.00136805	defense response // response to light stimulus // unidimensional cell growth // defense response to bacterium // defense response to fungus // pathogen-associated molecular pattern dependent induction by symbiont of host innate immune response // reactive oxygen species metabolic process
AT1G59670	GSTU15	glutathione S-transferase TAU 15	-0.646211	0.00646692	toxin catabolic process
AT5G14490	NAC085	NAC domain containing protein 85	-0.647112	0.000696778	regulation of transcription, DNA-dependent // multicellular organismal development
AT1G17590	NF-YA8	nuclear factor Y, subunit A8	-0.647201	2.63e-05	regulation of transcription, DNA-dependent // regulation of transcription, DNA-dependent
AT1G50270		Pentatricopeptide repeat (PPR) superfamily protein	-0.647207	0.00236166	chromosome segregation // sister chromatid cohesion // synapsis // reciprocal meiotic recombination // biological_process // organ morphogenesis // tissue development // positive regulation of organelle organization // regulation of chromosome organization // meiotic DNA double-strand break formation // meiotic chromosome segregation
AT4G18501			-0.647257	0.000127492	biological_process
AT5G37530		NAD(P)-binding Rossmann-fold superfamily protein	-0.647276	4.81e-05	---
AT3G45850		P-loop containing nucleoside triphosphate hydrolases superfamily protein	-0.647526	0.00323089	microtubule-based movement // microtubule nucleation
AT5G14000	NAC084	NAC domain containing protein 84	-0.647931	0.00793267	regulation of transcription, DNA-dependent // multicellular organismal development
AT3G10113		Homeodomain-like superfamily protein	-0.648305	0.000690514	regulation of transcription, DNA-dependent
AT3G63010	GID1B	alpha/beta-Hydrolases superfamily protein	-0.648403	0.00100932	MAPK cascade // response to superoxide // protein targeting to membrane // cell communication // signal transduction // metabolic process // cell death // response to cold // response to water deprivation // response to external stimulus // response to ethylene stimulus // response to auxin stimulus // response to abscisic acid stimulus // abscisic acid mediated signaling pathway // response to g…
AT2G43980	ITPK4	inositol 1,3,4-trisphosphate 5/6-kinase 4	-0.648403	2.8e-06	myo-inositol hexakisphosphate biosynthetic process
AT1G24270			-0.649074	0.00036035	biological_process
AT5G26860	LON_ARA_ARA	lon protease 1	-0.649095	0.0020061	karyogamy // response to hypoxia // ATP catabolic process // proteolysis // misfolded or incompletely synthesized protein catabolic process // mitochondrion organization // embryo sac egg cell differentiation // cellular response to oxidative stress // chaperone-mediated protein complex assembly // protein homooligomerization // oxidation-dependent protein catabolic process
AT3G21720	ICL	isocitrate lyase	-0.649496	0.00258145	metabolic process // metabolic process // seed dormancy process // carboxylic acid metabolic process
AT1G14910		ENTH/ANTH/VHS superfamily protein	-0.649679	0.000222526	clathrin coat assembly
AT3G42640	HA8	H(+)-ATPase 8	-0.649768	0.000134688	ATP catabolic process // ATP biosynthetic process // cation transport // metabolic process
AT5G39450		F-box family protein	-0.649925	6.94e-05	biological_process
AT4G25515	SLK3	SEUSS-like 3	-0.650151	2.23e-05	---
AT4G33925	SSN2		-0.650325	0.000135157	double-strand break repair via homologous recombination // defense response to bacterium
AT5G51580			-0.650348	0.00582654	biological_process
AT1G73165	CLE1	CLAVATA3/ESR-RELATED 1	-0.650511	0.000106515	signal transduction
AT3G21420	LBO1	2-oxoglutarate (2OG) and Fe(II)-dependent oxygenase superfamily protein	-0.650912	0.00352007	metabolic process // oxidation-reduction process
AT3G14510		Polyprenyl synthetase family protein	-0.651438	0.00546494	isoprenoid biosynthetic process // isoprenoid biosynthetic process
AT1G79640		Protein kinase superfamily protein	-0.651846	0.00367186	protein phosphorylation
AT4G15450		Senescence/dehydration-associated protein-related	-0.652188	9.44e-05	---
AT2G01060		myb-like HTH transcriptional regulator family protein	-0.652891	2.95e-06	regulation of transcription, DNA-dependent // N-terminal protein myristoylation // fatty acid beta-oxidation // intra-Golgi vesicle-mediated transport // protein import into peroxisome matrix
AT5G27000	KATD	kinesin 4	-0.652999	0.000605379	microtubule-based movement
AT5G37920		Family of unknown function (DUF577)	-0.65318	7.12e-05	biological_process
AT2G13650	GONST1	golgi nucleotide sugar transporter 1	-0.653438	7.64e-06	GDP-mannose transport // GDP-mannose transport // GDP-mannose transport
AT3G27440	UKL5	uridine kinase-like 5	-0.654158	4.46e-05	gluconeogenesis // cytoskeleton organization // metabolic process // biosynthetic process // proteasomal protein catabolic process
AT2G37960			-0.654635	0.00114663	biological_process
AT4G39235			-0.654718	7.49e-06	biological_process
AT1G73740		UDP-Glycosyltransferase superfamily protein	-0.654791	0.000253434	carbohydrate metabolic process // biosynthetic process // ethylene biosynthetic process // lipid glycosylation
AT4G24970		Histidine kinase-, DNA gyrase B-, and HSP90-like ATPase family protein	-0.65486	0.00920073	---
AT5G07100	WRKY26	WRKY DNA-binding protein 26	-0.654941	0.00458655	regulation of transcription, DNA-dependent // regulation of transcription, DNA-dependent // cellular response to heat // cellular heat acclimation
AT3G55470		Calcium-dependent lipid-binding (CaLB domain) family protein	-0.655597	0.00110716	protein targeting to membrane // biological_process // positive regulation of flavonoid biosynthetic process // regulation of plant-type hypersensitive response
AT5G54730	G18F	homolog of yeast autophagy 18 (ATG18) F	-0.655657	6.12e-07	cellular response to phosphate starvation // galactolipid biosynthetic process // response to starvation // cellular response to water deprivation
AT3G50830	COR413-PM2	cold-regulated 413-plasma membrane 2	-0.656208	4.97e-06	response to stress
AT3G18370	SYTF	C2 domain-containing protein	-0.656218	5.26e-05	biological_process
AT2G22500	UCP5	uncoupling protein 5	-0.656251	0.00547355	transport // mitochondrial transport // mitochondrial transport // mitochondrial transport // response to chitin
AT3G46190		TRAF-like family protein	-0.656464	0.000924911	biological_process
AT4G39610		Protein of unknown function, DUF617	-0.656929	0.000288995	biological_process
AT5G37180	SUS5	sucrose synthase 5	-0.65705	0.00186893	response to hypoxia // sucrose metabolic process // sucrose biosynthetic process // biosynthetic process // galactolipid biosynthetic process // callose deposition in phloem sieve plate
AT5G67420	LBD37	LOB domain-containing protein 37	-0.657075	1.26e-05	nitrogen compound metabolic process // simple leaf morphogenesis
AT4G00005		PRA1 (Prenylated rab acceptor) family protein	-0.657255	0.00162417	biological_process
AT4G26070	NMAPKK	MAP kinase/ ERK kinase 1	-0.657456	0.000383483	maltose metabolic process // MAPK cascade // MAPK cascade // response to molecule of bacterial origin // response to molecule of bacterial origin // respiratory burst involved in defense response // regulation of response to biotic stimulus // regulation of transcription, DNA-dependent // protein phosphorylation // protein targeting to membrane // cellular membrane fusion // cellular response to …
AT5G11110	SPSA2	sucrose phosphate synthase 2F	-0.657698	6.55e-05	response to hypoxia // sucrose metabolic process // biosynthetic process // pollen wall assembly // galactolipid biosynthetic process
AT3G04903		Defensin-like (DEFL) family protein	-0.657709	0.000623962	---
AT1G55790		Domain of unknown function (DUF2431)	-0.658269	0.00440538	metal ion transport
AT2G46940			-0.659237	0.0013537	biological_process
AT3G02210	COBL1	COBRA-like protein 1 precursor	-0.659244	0.000224114	biological_process // determination of bilateral symmetry // regulation of flower development // polarity specification of adaxial/abaxial axis // meristem initiation // xylem and phloem pattern formation // histone modification // floral organ formation
AT4G17483		alpha/beta-Hydrolases superfamily protein	-0.659253	3.56e-06	cellular protein modification process
AT5G23530	CXE18	carboxyesterase 18	-0.659495	0.00170811	metabolic process // pollen tube growth
AT3G55880	SUE4	Alpha/beta hydrolase related protein	-0.660324	0.00366851	cellular response to sulfate starvation
AT2G31335			-0.661673	0.00434403	---
AT5G07640		RING/U-box superfamily protein	-0.662522	3.42e-05	---
AT4G38810		Calcium-binding EF-hand family protein	-0.662698	0.00100034	---
AT5G20950		Glycosyl hydrolase family protein	-0.662747	0.000444794	carbohydrate metabolic process // carbohydrate metabolic process // systemic acquired resistance // response to endoplasmic reticulum stress
AT1G64020		Serine protease inhibitor (SERPIN) family protein	-0.663064	0.000380457	---
AT5G09420	TOC64-V	translocon at the outer membrane of chloroplasts 64-V	-0.66317	0.00877734	protein targeting to membrane // protein targeting to mitochondrion // protein targeting to mitochondrion // anion transport // nucleotide transport // ER to Golgi vesicle-mediated transport // cellular membrane fusion // regulation of plant-type hypersensitive response // ammonium transport // basic amino acid transport // negative regulation of programmed cell death // amino acid import // regu…
AT5G55520			-0.663419	0.000234493	microtubule cytoskeleton organization // cytokinesis by cell plate formation // cell fate specification // biological_process // regulation of flower development // gene silencing // histone phosphorylation // cell cycle process // histone lysine methylation // spindle assembly // anaphase
AT5G66910		Disease resistance protein (CC-NBS-LRR class) family	-0.663925	0.00251237	defense response // defense response
AT1G29040			-0.664026	0.000196401	---
AT3G11080	RLP35	receptor like protein 35	-0.664072	1.64e-05	defense response // signal transduction
AT4G01730		DHHC-type zinc finger family protein	-0.664279	0.00015905	microtubule cytoskeleton organization // cytokinesis by cell plate formation // methylation-dependent chromatin silencing // biological_process // chromatin silencing by small RNA // petal formation // sepal formation // histone H3-K9 methylation
AT3G11160			-0.664493	0.00299492	biological_process
AT1G02580	SDG5	SET domain-containing protein	-0.665064	0.00147306	#N/A
AT4G27470	RMA3	RING membrane-anchor 3	-0.665488	0.000365591	---
AT3G21780	UGT71B6	UDP-glucosyl transferase 71B6	-0.665593	0.00706076	response to osmotic stress // metabolic process // response to water deprivation // response to wounding // response to salt stress // response to ethylene stimulus // response to abscisic acid stimulus // response to abscisic acid stimulus // abscisic acid mediated signaling pathway // hyperosmotic salinity response // abscisic acid catabolic process
AT1G44414			-0.666036	0.00649174	protein folding // biological_process // response to heat // response to high light intensity // response to hydrogen peroxide
AT1G07390	RLP1	receptor like protein 1	-0.666343	0.000550177	#N/A
AT3G44800		Meprin and TRAF (MATH) homology domain-containing protein	-0.66689	0.00111412	biological_process
AT5G40050		F-box/FBD-like domains containing protein	-0.667182	0.00107008	biological_process
AT2G03670	CDC48B	cell division cycle 48B	-0.668636	0.000216885	embryo sac egg cell differentiation
AT3G47730	ATH1	ATP-binding cassette A2	-0.669012	0.000214775	toxin catabolic process // response to cyclopentenone
AT3G21830	SK8	SKP1-like 8	-0.669177	5.54e-05	ubiquitin-dependent protein catabolic process // ubiquitin-dependent protein catabolic process
AT5G11870		Alkaline phytoceramidase (aPHC)	-0.669277	0.000808604	ceramide metabolic process
AT1G05740		Eukaryotic protein of unknown function (DUF842)	-0.669851	0.00523685	#N/A
AT5G06230	TBL9	TRICHOME BIREFRINGENCE-LIKE 9	-0.670244	0.00341055	---
AT1G17400			-0.671017	0.00220818	biological_process
AT3G22160		VQ motif-containing protein	-0.672397	0.00722438	protein targeting to membrane // biological_process // response to water deprivation // ethylene biosynthetic process // response to abscisic acid stimulus // salicylic acid mediated signaling pathway // regulation of plant-type hypersensitive response // hyperosmotic salinity response // negative regulation of programmed cell death // response to other organism
AT1G80320		2-oxoglutarate (2OG) and Fe(II)-dependent oxygenase superfamily protein	-0.672449	0.000119291	biological_process // oxidation-reduction process
AT4G13510	ATAMT1;1	ammonium transporter 1;1	-0.672782	0.0036137	response to hypoxia // protein targeting to membrane // transport // anion transport // nucleotide transport // ER to Golgi vesicle-mediated transport // cellular membrane fusion // response to abscisic acid stimulus // systemic acquired resistance, salicylic acid mediated signaling pathway // regulation of hydrogen peroxide metabolic process // lateral root formation // regulation of plant-type …
AT5G14160		F-box family protein	-0.673774	0.000859888	biological_process
AT2G36800	UGT73C5	don-glucosyltransferase 1	-0.674059	0.00710755	metabolic process // brassinosteroid metabolic process
AT2G01540		Calcium-dependent lipid-binding (CaLB domain) family protein	-0.674477	0.000127393	biological_process
AT2G44700		Galactose oxidase/kelch repeat superfamily protein	-0.675354	3.26e-05	---
AT1G50750		Plant mobile domain protein family	-0.67607	0.00023202	---
AT3G16980	NRPE9A	RNA polymerases M/15 Kd subunit	-0.676212	0.00169538	transcription, DNA-dependent // transcription, DNA-dependent
AT1G07790	HTB1	Histone superfamily protein	-0.676268	6.78e-06	#N/A
AT5G45110	NPR3	NPR1-like protein 3	-0.676979	4.29e-05	protein targeting to membrane // cellular membrane fusion // response to xenobiotic stimulus // response to bacterium // systemic acquired resistance // salicylic acid biosynthetic process // defense response to bacterium, incompatible interaction // defense response to fungus, incompatible interaction // systemic acquired resistance, salicylic acid mediated signaling pathway // salicylic acid me…
AT2G18770		P-loop containing nucleoside triphosphate hydrolases superfamily protein	-0.67736	1.7e-05	biological_process // sterol biosynthetic process // sphingoid biosynthetic process
AT5G36940	CAT3	cationic amino acid transporter 3	-0.677585	3.12e-05	amino acid transmembrane transport // tryptophan catabolic process // transport // indoleacetic acid biosynthetic process // cellular cation homeostasis // transmembrane transport // divalent metal ion transport
AT1G28560	SRD2	snRNA activating complex family protein	-0.677894	0.000312581	snRNA transcription // snRNA transcription // organ morphogenesis
AT1G14120		2-oxoglutarate (2OG) and Fe(II)-dependent oxygenase superfamily protein	-0.678033	0.000187546	biological_process // oxidation-reduction process
AT1G25370		Protein of unknown function (DUF1639)	-0.678153	0.000505762	biological_process // ethylene biosynthetic process
AT3G10950		Zinc-binding ribosomal protein family protein	-0.678376	0.00124945	translation // translation // ribosome biogenesis
AT2G32795		other RNA	-0.680437	0.000107632	---
AT3G50230		Leucine-rich repeat protein kinase family protein	-0.680654	0.000846028	protein phosphorylation // protein phosphorylation // transmembrane receptor protein tyrosine kinase signaling pathway
AT3G48080		alpha/beta-Hydrolases superfamily protein	-0.68066	0.00212726	lipid metabolic process // lipid metabolic process // systemic acquired resistance // salicylic acid biosynthetic process
AT2G48150	GPX4	glutathione peroxidase 4	-0.681021	0.00161798	response to oxidative stress // toxin catabolic process // abscisic acid biosynthetic process // plant-type cell wall modification // pollen tube growth // oxidation-reduction process
AT3G24495	MSH7	MUTS homolog 7	-0.681238	0.000122523	meiotic mismatch repair // cytokinesis by cell plate formation // ATP catabolic process // DNA replication // DNA-dependent DNA replication initiation // regulation of DNA replication // mismatch repair // mismatch repair // DNA methylation // mitosis // meiosis // synapsis // reciprocal meiotic recombination // reciprocal meiotic recombination // cell proliferation // response to UV // regulatio…
AT5G42140		Regulator of chromosome condensation (RCC1) family with FYVE zinc finger domain	-0.681374	5.84e-05	signal transduction
AT1G01310		CAP (Cysteine-rich secretory proteins, Antigen 5, and Pathogenesis-related 1 protein) superfamily protein	-0.681667	2.57e-05	#N/A
AT1G34360		translation initiation factor 3 (IF-3) family protein	-0.681762	0.000548973	translational initiation // translational initiation
AT5G38260		Protein kinase superfamily protein	-0.681991	0.00207373	protein phosphorylation
AT5G19750		Peroxisomal membrane 22 kDa (Mpv17/PMP22) family protein	-0.682012	0.000112782	biological_process
AT3G63470	scpl40	serine carboxypeptidase-like 40	-0.682224	0.00388274	proteolysis // proteolysis
AT2G14060		S-adenosyl-L-methionine-dependent methyltransferases superfamily protein	-0.682568	0.00139613	fatty acid biosynthetic process
AT1G03240			-0.682682	0.00176161	biological_process
AT4G33020	ZIP9	ZIP metal ion transporter family	-0.682792	0.000655455	cation transport // response to zinc ion // metal ion transport // transmembrane transport // zinc ion transmembrane transport
AT2G02360	PP2-B10	phloem protein 2-B10	-0.683226	3.75e-06	---
AT5G07130	LAC13	laccase 13	-0.683558	0.00137247	lignin catabolic process // oxidation-reduction process
AT4G19970			-0.684226	0.00303928	biological_process
AT3G51890		Clathrin light chain protein	-0.684832	0.000184439	intracellular protein transport // vesicle-mediated transport // endoplasmic reticulum unfolded protein response
AT1G60460			-0.684889	0.000647859	biological_process
AT2G45510	CYP704A2	cytochrome P450, family 704, subfamily A, polypeptide 2	-0.684974	0.00365988	oxidation-reduction process
AT3G61980		serine protease inhibitor, Kazal-type family protein	-0.685885	2.89e-05	biological_process // response to chitin
AT2G17060		Disease resistance protein (TIR-NBS-LRR class) family	-0.686133	0.00243734	defense response // defense response // signal transduction
AT5G02640			-0.686326	0.0013031	biological_process
AT3G46110		Domain of unknown function (DUF966)	-0.6868	0.00729894	---
AT1G36580			-0.68701	7.14e-06	---
AT1G34480		Cysteine/Histidine-rich C1 domain family protein	-0.687588	0.00506029	biological_process // oxidation-reduction process
AT1G17430		alpha/beta-Hydrolases superfamily protein	-0.687675	0.00336921	#N/A
AT5G49570	PNG1	peptide-N-glycanase 1	-0.687954	0.000213626	nucleotide-excision repair // N-terminal protein myristoylation // response to salicylic acid stimulus // response to microbial phytotoxin // response to ozone
AT2G20980	MCM10	minichromosome maintenance 10	-0.688375	0.00228012	DNA replication // DNA-dependent DNA replication initiation
AT5G62730		Major facilitator superfamily protein	-0.689657	0.000174588	oligopeptide transport // oligopeptide transport
AT1G24150	FH4	formin homologue 4	-0.690449	0.00823229	systemic acquired resistance // salicylic acid biosynthetic process // cellular component organization // actin cytoskeleton organization // actin filament polymerization
AT3G27329		Plant self-incompatibility protein S1 family	-0.690591	0.000260238	biological_process
AT4G16700	PSD1	phosphatidylserine decarboxylase 1	-0.690788	0.000374527	phospholipid biosynthetic process
AT5G17760		P-loop containing nucleoside triphosphate hydrolases superfamily protein	-0.692577	0.00110017	systemic acquired resistance // salicylic acid biosynthetic process
AT1G01740		Protein kinase protein with tetratricopeptide repeat domain	-0.692705	0.000500401	protein phosphorylation
AT3G29240		Protein of unknown function (DUF179)	-0.692829	0.000203257	biological_process
AT5G65710	HSL2	HAESA-like 2	-0.692994	0.000121012	protein phosphorylation // protein phosphorylation // transmembrane receptor protein tyrosine kinase signaling pathway
AT1G33720	CYP76C6	cytochrome P450, family 76, subfamily C, polypeptide 6	-0.693794	0.00447174	oxidation-reduction process
AT1G68290	ENDO 2	endonuclease 2	-0.69416	2.54e-06	DNA catabolic process // nucleic acid phosphodiester bond hydrolysis
AT5G37480			-0.694515	1.33e-05	biological_process // response to insect // systemic acquired resistance, salicylic acid mediated signaling pathway // negative regulation of defense response
AT5G38310			-0.696647	0.00182575	biological_process
AT4G35500		Protein kinase superfamily protein	-0.696752	0.00419314	protein phosphorylation
AT5G66900		Disease resistance protein (CC-NBS-LRR class) family	-0.696949	3.77e-05	defense response // defense response
AT1G23120		Polyketide cyclase/dehydrase and lipid transport superfamily protein	-0.697162	0.000157684	defense response // response to biotic stimulus
AT3G20200		Protein kinase protein with adenine nucleotide alpha hydrolases-like domain	-0.697501	0.000376608	response to molecule of fungal origin // protein phosphorylation // response to stress // protein autophosphorylation
AT4G35620	CYCB2;2	Cyclin B2;2	-0.697732	0.00351092	regulation of cyclin-dependent protein kinase activity // stomatal lineage progression // regulation of cell cycle // regulation of cell cycle
AT3G10660	CPK2	calmodulin-domain protein kinase cdpk isoform 2	-0.698585	0.00227931	protein phosphorylation // protein phosphorylation
AT4G10720		Ankyrin repeat family protein	-0.698599	0.000826852	biological_process
AT5G48175			-0.69899	0.000454196	biological_process
AT5G18362		Cytokine-induced anti-apoptosis inhibitor 1, Fe-S biogenesis	-0.699141	4.58e-05	biological_process
AT1G77030		hydrolases, acting on acid anhydrides, in phosphorus-containing anhydrides;ATP-dependent helicases;nucleic acid binding;ATP binding;RNA binding;helicases	-0.70042	0.0014522	---
AT2G36050	OFP15	ovate family protein 15	-0.700427	0.00662667	response to brassinosteroid stimulus // negative regulation of transcription, DNA-dependent
AT5G49070	KCS21	3-ketoacyl-CoA synthase 21	-0.700873	0.00061678	very long-chain fatty acid metabolic process // very long-chain fatty acid metabolic process // fatty acid biosynthetic process // metabolic process // lipid biosynthetic process // response to cold // cuticle development // cuticle development
AT3G14710		RNI-like superfamily protein	-0.700906	0.000161077	biological_process
AT2G31880	SOBIR1	Leucine-rich repeat protein kinase family protein	-0.701083	7.24e-06	protein phosphorylation // protein phosphorylation // transmembrane receptor protein tyrosine kinase signaling pathway // positive regulation of cell death // positive regulation of defense response // negative regulation of floral organ abscission
AT1G16970	KU70	KU70 homolog	-0.701271	2.05e-06	telomere maintenance // DNA repair // double-strand break repair via nonhomologous end joining // response to heat
AT1G29110		Cysteine proteinases superfamily protein	-0.701518	0.00182875	proteolysis // proteolysis
AT1G59620	CW9	Disease resistance protein (CC-NBS-LRR class) family	-0.701865	4.34e-06	defense response // defense response
AT4G29770			-0.701914	0.00368456	protein folding // biological_process // response to heat // response to high light intensity // response to hydrogen peroxide
AT2G35210	RPA	root and pollen arfgap	-0.70206	0.000450815	pollen development // embryo development ending in seed dormancy // plant-type cell wall modification // pollen tube growth // regulation of ARF GTPase activity // cellular process involved in reproduction // pollen tube development
AT4G04460		Saposin-like aspartyl protease family protein	-0.703434	0.000121774	proteolysis // proteolysis // lipid metabolic process // response to cadmium ion
AT2G19330	PIRL6	plant intracellular ras group-related LRR 6	-0.703909	2.92e-06	biological_process // DNA endoreduplication
AT1G67830	FXG1	alpha-fucosidase 1	-0.704245	0.000881488	lipid metabolic process // glucosinolate biosynthetic process
AT2G33260		Tryptophan/tyrosine permease	-0.704817	0.00286647	cell fate specification // purine base transport // amino acid transport
AT2G30140		UDP-Glycosyltransferase superfamily protein	-0.705041	0.000326846	toxin catabolic process // systemic acquired resistance // regulation of flower development // response to cyclopentenone // response to endoplasmic reticulum stress
AT5G14480		beta-1,4-N-acetylglucosaminyltransferase family protein	-0.705302	0.000201066	protein N-linked glycosylation
AT1G06135			-0.705968	0.00697636	#N/A
AT3G29070		emp24/gp25L/p24 family/GOLD family protein	-0.705982	0.000720641	transport // intracellular protein transport
AT5G18220		O-Glycosyl hydrolases family 17 protein	-0.706241	0.000232157	carbohydrate metabolic process
AT1G04490		Protein of unknown function (DUF3527)	-0.706424	0.000928791	biological_process
AT3G20015		Eukaryotic aspartyl protease family protein	-0.70645	0.00453475	proteolysis // proteolysis
AT3G49480		Protein with RNI-like/FBD-like domains	-0.706462	0.0064324	purine base transport // biological_process
AT1G17490			-0.707466	0.000157923	#N/A
AT3G03500		TatD related DNase	-0.708375	0.00212034	---
AT3G25610		ATPase E1-E2 type family protein / haloacid dehalogenase-like hydrolase family protein	-0.7094	0.00929298	cation transport // phospholipid transport
AT4G36515			-0.709778	0.000535324	biological_process
AT4G10570	UBP9	ubiquitin-specific protease 9	-0.709957	0.000117397	ubiquitin-dependent protein catabolic process // ubiquitin-dependent protein catabolic process
AT2G44065		Ribosomal protein L2 family	-0.710413	1.1e-06	transcription elongation, DNA-dependent // translation // translation // ubiquitin-dependent protein catabolic process // photorespiration // response to misfolded protein // proteasome core complex assembly
AT4G38980			-0.710797	1.07e-05	biological_process
AT4G23170	EP1	receptor-like protein kinase-related family protein	-0.710837	0.00101822	response to salicylic acid stimulus // programmed cell death
AT3G07720		Galactose oxidase/kelch repeat superfamily protein	-0.710926	0.00906016	systemic acquired resistance // salicylic acid biosynthetic process // response to zinc ion
AT2G27920	SCPL51	serine carboxypeptidase-like 51	-0.711248	0.000274857	proteolysis // proteolysis // systemic acquired resistance // response to endoplasmic reticulum stress
AT3G56500		serine-rich protein-related	-0.711331	6.39e-06	biological_process
AT2G06050	OPR3	oxophytodienoate-reductase 3	-0.711403	0.000652193	tryptophan catabolic process // signal transduction // response to water deprivation // response to wounding // response to wounding // response to fungus // response to fungus // indoleacetic acid biosynthetic process // jasmonic acid metabolic process // jasmonic acid biosynthetic process // jasmonic acid biosynthetic process // response to ethylene stimulus // response to auxin stimulus // abs…
AT1G11370		Pectin lyase-like superfamily protein	-0.711515	0.000317103	cell wall modification
AT5G12340			-0.712045	0.00389695	biological_process
AT3G09830		Protein kinase superfamily protein	-0.712359	6.08e-05	protein phosphorylation // protein targeting to membrane // cellular membrane fusion // systemic acquired resistance // ethylene biosynthetic process // salicylic acid biosynthetic process // regulation of plant-type hypersensitive response // regulation of defense response // negative regulation of programmed cell death
AT5G39493		Plant self-incompatibility protein S1 family	-0.712507	0.00825741	---
AT3G56840		FAD-dependent oxidoreductase family protein	-0.712716	6.65e-07	biological_process // oxidation-reduction process
AT4G12270		Copper amine oxidase family protein	-0.713293	0.00213905	amine metabolic process // oxidation-reduction process
AT3G58460	RBL15	RHOMBOID-like protein 15	-0.713773	2.88e-07	---
AT3G54780		Zinc finger (C3HC4-type RING finger) family protein	-0.71444	0.00343999	---
AT2G46440	CNGC11	cyclic nucleotide-gated channels	-0.714479	0.00313486	ion transport // response to fungus // transmembrane transport
AT5G27210		Protein of unknown function, transmembrane-40	-0.714613	6.22e-06	biological_process
AT1G14640		SWAP (Suppressor-of-White-APricot)/surp domain-containing protein	-0.714745	0.00016917	#N/A
AT1G34540	CYP94D1	cytochrome P450, family 94, subfamily D, polypeptide 1	-0.715667	5.59e-05	oxidation-reduction process
AT1G15900			-0.715711	0.00185012	#N/A
AT2G16020			-0.715747	5.01e-05	biological_process // carpel morphogenesis
AT1G07220		Arabidopsis thaliana protein of unknown function (DUF821)	-0.715771	0.000743419	biological_process
AT2G41550		Rho termination factor	-0.715956	2.43e-06	transcription termination, DNA-dependent
AT4G22530		S-adenosyl-L-methionine-dependent methyltransferases superfamily protein	-0.716469	0.000708793	respiratory burst involved in defense response // metabolic process // response to chitin // endoplasmic reticulum unfolded protein response // para-aminobenzoic acid metabolic process
AT3G57490		Ribosomal protein S5 family protein	-0.716997	0.00022245	RNA methylation // translation // translation // pyrimidine ribonucleotide biosynthetic process
AT5G10970		C2H2 and C2HC zinc fingers superfamily protein	-0.717468	0.00562596	regulation of transcription, DNA-dependent
AT5G08680		ATP synthase alpha/beta family protein	-0.717586	5.52e-06	ATP catabolic process // ATP biosynthetic process // ATP synthesis coupled proton transport // ATP hydrolysis coupled proton transport // proton transport // ATP metabolic process // response to cadmium ion
AT3G16730	HEB2		-0.717743	1.03e-06	---
AT1G01030	NGA3	AP2/B3-like transcriptional factor family protein	-0.717781	0.000305058	regulation of transcription, DNA-dependent // regulation of transcription, DNA-dependent // flower development // leaf development
AT3G48770		DNA binding;ATP binding	-0.717951	5.18e-05	biological_process
AT5G39970		catalytics	-0.718359	0.000315978	carbohydrate metabolic process // brassinosteroid biosynthetic process
AT5G47540		Mo25 family protein	-0.718434	0.000284718	biological_process
AT3G18830	PMT5	polyol/monosaccharide transporter 5	-0.718509	9.06e-05	transport // negative regulation of defense response // amino acid import // transmembrane transport
AT3G08870		Concanavalin A-like lectin protein kinase family protein	-0.718789	0.00748278	protein phosphorylation
AT1G27710		Glycine-rich protein family	-0.719042	0.00161747	biological_process
AT5G61010	EXO70E2	exocyst subunit exo70 family protein E2	-0.719718	0.000516924	response to molecule of bacterial origin // exocytosis // vesicle docking involved in exocytosis // systemic acquired resistance // salicylic acid biosynthetic process
AT4G17900		PLATZ transcription factor family protein	-0.71991	0.00155267	biological_process
AT1G16160	WAKL5	wall associated kinase-like 5	-0.719944	0.00390232	#N/A
AT5G54260	MRE11	DNA repair and meiosis protein (Mre11)	-0.721407	1.57e-06	DNA metabolic process // double-strand break repair
AT4G12710		ARM repeat superfamily protein	-0.721878	0.00012777	biological_process
AT1G55320	AAE18	acyl-activating enzyme 18	-0.72232	0.000194077	metabolic process // metabolic process // auxin metabolic process
AT5G61740	ATH14	ABC2 homolog 14	-0.722423	0.000127397	---
AT1G29560		Zinc finger C-x8-C-x5-C-x3-H type family protein	-0.723353	5.6e-07	---
AT3G60961		P-loop containing nucleoside triphosphate hydrolases superfamily protein	-0.723438	0.00849449	nucleobase-containing compound metabolic process
AT2G22660		Protein of unknown function (duplicated DUF1399)	-0.723593	7.53e-05	biological_process
AT1G10230	SK18	SKP1-like 18	-0.724062	0.00516621	#N/A
AT4G19990	FRS1	FAR1-related sequence 1	-0.724388	4.75e-06	response to red or far red light
AT3G62620		sucrose-phosphatase-related	-0.724641	1.79e-05	biological_process
AT5G23850		Arabidopsis thaliana protein of unknown function (DUF821)	-0.72465	5.41e-05	biological_process
AT1G50240	FU	Protein kinase family protein with ARM repeat domain	-0.724763	0.000420939	M phase of mitotic cell cycle // microtubule cytoskeleton organization // nuclear division // cytokinesis by cell plate formation // cytokinesis by cell plate formation // DNA replication // DNA-dependent DNA replication initiation // regulation of DNA replication // DNA methylation // chromatin silencing // methylation-dependent chromatin silencing // protein phosphorylation // nucleolus organiz…
AT1G07410	RABA2b	RAB GTPase homolog A2B	-0.725583	0.00030394	#N/A
AT5G18350		Disease resistance protein (TIR-NBS-LRR class) family	-0.726317	0.00266451	defense response // defense response // signal transduction
AT2G25370		RING/U-box superfamily protein	-0.726812	0.00201214	---
AT2G36670		Eukaryotic aspartyl protease family protein	-0.727251	7.31e-06	N-terminal protein myristoylation // proteolysis // proteolysis // fatty acid beta-oxidation // protein import into peroxisome matrix
AT5G18370		Disease resistance protein (TIR-NBS-LRR class) family	-0.727279	4.62e-06	defense response // defense response // defense response // signal transduction
AT2G27389			-0.727904	5.06e-05	---
AT2G34825	RALFL20	RALF-like 20	-0.728704	0.000520054	cell-cell signaling
AT3G57600		Integrase-type DNA-binding superfamily protein	-0.728792	0.00370321	regulation of transcription, DNA-dependent // regulation of transcription, DNA-dependent // specification of floral organ identity // carpel development // meristem development
AT1G75390	bZIP44	basic leucine-zipper 44	-0.729156	0.000930559	---
AT5G46915		transcriptional factor B3 family protein	-0.729512	0.00871662	regulation of transcription, DNA-dependent
AT5G01640	PRA1.B5	prenylated RAB acceptor 1.B5	-0.729828	0.00240539	vesicle-mediated transport
AT2G44690	ROP8	Arabidopsis RAC-like 9	-0.7305	0.00689686	GTP catabolic process // actin filament organization // signal transduction // small GTPase mediated signal transduction // trichome morphogenesis // protein transport // actin nucleation
AT3G56320		PAP/OAS1 substrate-binding domain superfamily	-0.730653	0.000606602	---
AT1G22275	ZYP1b	Myosin heavy chain-related protein	-0.731025	0.00995815	#N/A
AT4G14020		Rapid alkalinization factor (RALF) family protein	-0.73222	0.00140954	biological_process
AT1G01710		Acyl-CoA thioesterase family protein	-0.732239	7.83e-06	#N/A
AT3G02030		transferases, transferring acyl groups other than amino-acyl groups;acyltransferases	-0.732509	6.44e-05	metabolic process
AT1G67940	NAP3	non-intrinsic ABC protein 3	-0.732738	0.00899014	phosphate ion transmembrane transport
AT5G20400		2-oxoglutarate (2OG) and Fe(II)-dependent oxygenase superfamily protein	-0.732979	0.000968937	biological_process // nucleotide biosynthetic process // response to nitrate // nitrate transport // oxidation-reduction process
AT4G11530	CRK34	cysteine-rich RLK (RECEPTOR-like protein kinase) 34	-0.733016	1.06e-05	protein phosphorylation
AT3G26180	CYP71B20	cytochrome P450, family 71, subfamily B, polypeptide 20	-0.734259	0.00180255	oxidation-reduction process
AT5G27920		F-box family protein	-0.734343	0.00372902	biological_process // toxin catabolic process
AT5G48780		disease resistance protein (TIR-NBS class)	-0.734581	8.1e-05	defense response // defense response // signal transduction
AT1G34120	IP5PI	inositol polyphosphate 5-phosphatase I	-0.734712	1.2e-05	inositol trisphosphate metabolic process // inositol trisphosphate metabolic process // phosphatidylinositol phosphorylation // inositol phosphate dephosphorylation // inositol phosphate dephosphorylation
AT5G15720	GLIP7	GDSL-motif lipase 7	-0.734881	0.000308587	lipid metabolic process
AT3G16580		F-box and associated interaction domains-containing protein	-0.735079	0.00061344	biological_process
AT1G76994			-0.735379	3.6e-05	---
AT5G46880	HDG5	homeobox-7	-0.735724	4.65e-06	regulation of transcription, DNA-dependent // regulation of transcription, DNA-dependent // cellular membrane fusion
AT3G09220	LAC7	laccase 7	-0.736653	0.000251776	transition metal ion transport // iron ion transport // cellular response to iron ion starvation // response to nitrate // nitrate transport // lignin catabolic process // oxidation-reduction process
AT1G74080	MYB122	myb domain protein 122	-0.736806	0.000974944	regulation of transcription, DNA-dependent
AT1G13990			-0.737116	0.00559687	#N/A
AT4G36090		oxidoreductase, 2OG-Fe(II) oxygenase family protein	-0.737179	0.000244576	biological_process
AT4G02005		other RNA	-0.737457	0.000130751	---
AT1G78820		D-mannose binding lectin protein with Apple-like carbohydrate-binding domain	-0.737537	0.00283719	---
AT5G04930	ALA1	aminophospholipid ATPase 1	-0.737884	1.98e-05	protein targeting to membrane // cation transport // metabolic process // positive regulation of flavonoid biosynthetic process // regulation of plant-type hypersensitive response // phospholipid transport
AT1G71750	HGPT	Hypoxanthine-guanine phosphoribosyltransferase	-0.738213	8.4e-05	purine ribonucleoside salvage // purine ribonucleoside salvage // adenine salvage // guanine salvage // nucleoside metabolic process // nucleoside metabolic process // seed germination // GMP salvage // IMP salvage // guanine metabolic process // hypoxanthine metabolic process
AT5G15800	2001-09-01	K-box region and MADS-box transcription factor family protein	-0.738387	0.000151102	regulation of transcription, DNA-dependent // plant-type cell wall modification // pollen tube growth // post-embryonic morphogenesis // flower development // regulation of flower development // vernalization response // specification of floral organ identity // anthocyanin accumulation in tissues in response to UV light // carpel development // petal development // stamen development // ovule de…
AT1G10920	LOV1	NB-ARC domain-containing disease resistance protein	-0.738867	8.75e-06	response to molecule of fungal origin // defense response // defense response // defense response to fungus
AT1G69270	RPK1	receptor-like protein kinase 1	-0.739324	0.00161521	MAPK cascade // response to superoxide // protein phosphorylation // N-terminal protein myristoylation // protein targeting to membrane // cell communication // signal transduction // cell death // response to cold // response to cold // response to water deprivation // response to water deprivation // response to external stimulus // response to wounding // response to salt stress // response to…
AT5G25770		alpha/beta-Hydrolases superfamily protein	-0.73945	0.000159132	biological_process // organ senescence // para-aminobenzoic acid metabolic process
AT4G13660	PRR2	pinoresinol reductase 2	-0.739661	0.00462966	iron ion transport // response to wounding // coumarin biosynthetic process // lignan biosynthetic process // positive regulation of flavonoid biosynthetic process // cellular response to iron ion starvation // response to nitrate // nitrate transport
AT1G05030		Major facilitator superfamily protein	-0.739998	6.92e-05	transport // transmembrane transport
AT4G20830		FAD-binding Berberine family protein	-0.740317	0.00793817	respiratory burst involved in defense response // protein targeting to membrane // cellular membrane fusion // response to oxidative stress // response to oxidative stress // response to wounding // response to chitin // regulation of plant-type hypersensitive response // endoplasmic reticulum unfolded protein response // negative regulation of programmed cell death // oxidation-reduction process
AT1G60830		RNA-binding (RRM/RBD/RNP motifs) family protein	-0.740788	4.84e-05	---
AT1G21270	WAK2	wall-associated kinase 2	-0.740891	1.12e-05	#N/A
AT1G78090	TPPB	trehalose-6-phosphate phosphatase	-0.7409	0.00307614	transition metal ion transport // trehalose biosynthetic process // trehalose biosynthetic process // metabolic process
AT1G66020		Terpenoid cyclases/Protein prenyltransferases superfamily protein	-0.741493	0.00126671	metabolic process
AT5G18360		Disease resistance protein (TIR-NBS-LRR class) family	-0.741834	3.02e-06	defense response // defense response // signal transduction
AT5G02610		Ribosomal L29 family protein	-0.742074	8.31e-06	translation // translation // ribosome biogenesis
AT1G11500		Protein of unknown function (DUF1218)	-0.742384	9.82e-05	#N/A
AT3G05380	ATALY2	DIRP ;Myb-like DNA-binding domain	-0.742724	0.000458951	---
AT4G34480		O-Glycosyl hydrolases family 17 protein	-0.743081	5.16e-05	carbohydrate metabolic process
AT5G15870		glycosyl hydrolase family 81 protein	-0.743152	0.000999169	N-terminal protein myristoylation // ER to Golgi vesicle-mediated transport // cell wall macromolecule catabolic process // endoplasmic reticulum unfolded protein response // amino acid import
AT2G23149			-0.74385	0.00135053	---
AT3G14780			-0.744463	0.00918436	biological_process
AT4G37530		Peroxidase superfamily protein	-0.74507	0.000736228	response to oxidative stress // response to salt stress // oxidation-reduction process
AT5G14930	SAG101	senescence-associated gene 101	-0.745968	0.000359005	lipid metabolic process // lipid metabolic process // aging // systemic acquired resistance // salicylic acid biosynthetic process // salicylic acid mediated signaling pathway // response to chitin // endoplasmic reticulum unfolded protein response // negative regulation of defense response // innate immune response
AT1G43810			-0.746569	0.00224939	biological_process
AT4G23010	UTR2	UDP-galactose transporter 2	-0.74673	0.00212767	transmembrane transport // UDP-galactose transmembrane transport
AT4G18990	XTH29	xyloglucan endotransglucosylase/hydrolase 29	-0.746874	3.7e-05	carbohydrate metabolic process // cellular glucan metabolic process
AT2G22820			-0.747209	0.000708064	biological_process
AT1G07120			-0.747296	1.4e-05	biological_process
AT1G32340	NHL8	NDR1/HIN1-like 8	-0.747718	3.72e-06	protein N-linked glycosylation // N-terminal protein myristoylation // biological_process // response to symbiotic fungus
AT1G77720	PPK1	putative protein kinase 1	-0.748279	3.06e-05	microtubule cytoskeleton organization // cytokinesis by cell plate formation // DNA methylation // chromatin silencing // methylation-dependent chromatin silencing // protein phosphorylation // cell-cell signaling // virus induced gene silencing // regulation of flower development // production of ta-siRNAs involved in RNA interference // histone modification // gene silencing by RNA // chromatin…
AT4G21720			-0.748714	1.68e-07	biological_process
AT2G01310			-0.748937	0.000163796	biological_process
AT1G18990		Protein of unknown function, DUF593	-0.749574	0.00221311	biological_process
AT2G21730	CAD2	cinnamyl alcohol dehydrogenase homolog 2	-0.750004	0.000138692	lignin biosynthetic process // oxidation-reduction process
AT4G37740	GRF2	growth-regulating factor 2	-0.750228	4.29e-06	regulation of transcription, DNA-dependent // response to abscisic acid stimulus // embryo development ending in seed dormancy // seed germination // leaf morphogenesis // seed dormancy process // leaf development
AT2G05760		Xanthine/uracil permease family protein	-0.750444	9.61e-07	transport // transmembrane transport
AT2G36710		Pectin lyase-like superfamily protein	-0.750892	0.000818217	cell wall modification
AT3G60520			-0.75091	0.000137852	biological_process
AT3G19040	TAF1B	histone acetyltransferase of the TAFII250 family 2	-0.751019	5.47e-05	RNA splicing, via endonucleolytic cleavage and ligation // transcription from RNA polymerase II promoter // response to light stimulus // histone acetylation
AT4G19645		TRAM, LAG1 and CLN8 (TLC) lipid-sensing domain containing protein	-0.751329	2.95e-06	biological_process
AT1G29300	UNE1	Plant protein of unknown function (DUF641)	-0.75174	0.000213762	double fertilization forming a zygote and endosperm
AT2G39710		Eukaryotic aspartyl protease family protein	-0.751845	0.000213672	proteolysis // proteolysis
AT4G21600	ENDO5	endonuclease 5	-0.752078	0.00253978	transition metal ion transport // DNA catabolic process // DNA catabolic process // iron ion transport // cellular response to iron ion starvation // response to nitrate // nitrate transport // brassinosteroid biosynthetic process
AT4G22212		Arabidopsis defensin-like protein	-0.752311	0.00540235	transition metal ion transport // defense response // root hair elongation
AT3G63320		Protein phosphatase 2C family protein	-0.753734	6.5e-05	---
AT2G35035	URED	urease accessory protein D	-0.754075	0.00321682	nitrogen compound metabolic process // nitrogen compound metabolic process // nitrogen compound metabolic process // positive regulation of metalloenzyme activity
AT4G14840			-0.754513	0.00010478	---
AT5G34940	GUS3	glucuronidase 3	-0.754863	7.02e-05	---
AT1G26530		PIN domain-like family protein	-0.754984	0.00153192	biological_process // determination of bilateral symmetry // polarity specification of adaxial/abaxial axis // meristem initiation // regulation of meristem growth
AT1G06050		Protein of unknown function (DUF1336)	-0.755057	0.000346396	biological_process
AT2G21350		RNA-binding CRS1 / YhbY (CRM) domain protein	-0.755476	0.00392531	biological_process
AT4G08700	ATPUP13	Drug/metabolite transporter superfamily protein	-0.755512	0.000236625	purine base transport
AT1G67650		SRP72 RNA-binding domain	-0.75595	0.00150091	SRP-dependent cotranslational protein targeting to membrane
AT1G17560	HLL	Ribosomal protein L14p/L23e family protein	-0.756479	0.000736083	transcription elongation, DNA-dependent // translation // translation
AT3G61610		Galactose mutarotase-like superfamily protein	-0.756831	7.05e-05	carbohydrate metabolic process // galactose metabolic process
AT1G05220		Transmembrane protein 97, predicted	-0.757644	0.000129211	#N/A
AT1G69520		S-adenosyl-L-methionine-dependent methyltransferases superfamily protein	-0.758087	0.00734057	metabolic process
AT1G76070			-0.758317	1.27e-05	biological_process // response to chitin // defense response to fungus
AT1G56030		RING/U-box superfamily protein	-0.758892	1.8e-05	translation // protein ubiquitination
AT1G12210	RFL1	RPS5-like 1	-0.759228	0.00011989	#N/A
AT4G37290			-0.759637	0.00548134	ethylene biosynthetic process // response to ethylene stimulus // response to karrikin
AT5G65920		ARM repeat superfamily protein	-0.759849	0.00452464	protein ubiquitination
AT3G08720	S6K2	serine/threonine protein kinase 2	-0.760258	0.00133718	protein phosphorylation // protein phosphorylation // protein targeting to membrane // response to heat // response to cold // response to salt stress // response to ethylene stimulus // abscisic acid mediated signaling pathway // salicylic acid mediated signaling pathway // jasmonic acid mediated signaling pathway // response to chitin // regulation of plant-type hypersensitive response // endop…
AT1G49032			-0.76039	0.000302655	biological_process
AT1G72280	ERO1	endoplasmic reticulum oxidoreductins 1	-0.760463	0.000887793	protein thiol-disulfide exchange // ER-nucleus signaling pathway // response to endoplasmic reticulum stress // oxidation-reduction process // cellular response to biotic stimulus
AT1G41880		Ribosomal protein L35Ae family protein	-0.761085	5.46e-05	translation // translation // ribosome biogenesis
AT5G53780		Protein of unknown function (DUF295)	-0.761487	9e-06	biological_process
AT5G08380	AtAGAL1	alpha-galactosidase 1	-0.761698	0.00319037	carbohydrate metabolic process // oligosaccharide metabolic process // glycoside catabolic process // glycosylceramide catabolic process
AT5G45900	ATG7	ThiF family protein	-0.762036	4.75e-07	protein lipidation // autophagy // aging // leaf senescence // leaf senescence // organ senescence // cellular response to phosphate starvation // galactolipid biosynthetic process // cellular response to water deprivation // defense response to fungus
AT5G07070	SnRK3.2	CBL-interacting protein kinase 2	-0.762537	0.000361594	protein phosphorylation // signal transduction // stomatal movement // calcium-mediated signaling
AT1G22500	ATL15	RING/U-box superfamily protein	-0.762557	0.00547176	#N/A
AT3G11820	SYR1	syntaxin of plants 121	-0.762678	0.00370571	MAPK cascade // respiratory burst involved in defense response // regulation of response to biotic stimulus // regulation of transcription, DNA-dependent // protein targeting to membrane // protein targeting to membrane // anion transport // nucleotide transport // intracellular protein transport // intracellular protein transport // ER to Golgi vesicle-mediated transport // cellular membrane fus…
AT3G48570		secE/sec61-gamma protein transport protein	-0.762723	3.28e-06	protein targeting // protein targeting // amino acid transport // intracellular protein transport // intracellular protein transport // protein transport // proline transport
AT5G13190	GILP		-0.763583	0.000473804	protein targeting to membrane // response to absence of light // salicylic acid mediated signaling pathway // jasmonic acid mediated signaling pathway // regulation of plant-type hypersensitive response // endoplasmic reticulum unfolded protein response // negative regulation of plant-type hypersensitive response
AT1G52315		Regulator of Vps4 activity in the MVB pathway protein	-0.763643	0.00192681	biological_process
AT3G15550			-0.764706	0.000200969	microtubule cytoskeleton organization // double-strand break repair via homologous recombination // cytokinesis by cell plate formation // DNA methylation // chromatin silencing // methylation-dependent chromatin silencing // biological_process // gene silencing by RNA // chromatin silencing by small RNA // heterochromatin assembly // positive regulation of cell cycle // petal formation // sepal …
AT1G20780	SAUL1	senescence-associated E3 ubiquitin ligase 1	-0.76559	0.000838859	#N/A
AT4G18880	HSF A4A	heat shock transcription factor A4A	-0.765746	2.44e-05	respiratory burst involved in defense response // regulation of transcription, DNA-dependent // response to heat // response to chitin // response to chitin // intracellular signal transduction
AT1G08310		alpha/beta-Hydrolases superfamily protein	-0.7662	0.000975016	#N/A
AT2G29470	GSTU3	glutathione S-transferase tau 3	-0.766295	1e-06	fatty acid beta-oxidation // toxin catabolic process // toxin catabolic process // proteasomal ubiquitin-dependent protein catabolic process // response to misfolded protein // proteasome core complex assembly
AT4G16350	SCABP2	calcineurin B-like protein 6	-0.767856	0.00132357	calcium-mediated signaling // calcium-mediated signaling
AT1G68200		Zinc finger C-x8-C-x5-C-x3-H type family protein	-0.768066	0.00212876	regulation of transcription, DNA-dependent
AT5G28390		RNA-binding (RRM/RBD/RNP motifs) family protein	-0.768635	1.44e-05	biological_process
AT3G19260	LOH2	LAG1 homologue 2	-0.768767	0.0074316	response to molecule of fungal origin // sterol biosynthetic process // long-chain fatty acid biosynthetic process // sphingoid biosynthetic process
AT1G72240			-0.768856	0.000662861	biological_process
AT5G60630			-0.769286	8.83e-05	biological_process
AT2G34010			-0.769805	0.0032334	biological_process
AT1G33850		Ribosomal protein S19 family protein	-0.769987	0.000138772	translation // translation
AT2G30505		Late embryogenesis abundant (LEA) hydroxyproline-rich glycoprotein family	-0.770222	0.000258848	biological_process
AT1G08450	PSL1	calreticulin 3	-0.771892	8.29e-06	protein folding // protein folding // cellular response to nitrogen starvation // response to bacterium // plant-type hypersensitive response // systemic acquired resistance // salicylic acid biosynthetic process // defense response signaling pathway, resistance gene-independent // regulation of defense response // response to endoplasmic reticulum stress // defense response to bacterium // innat…
AT5G55150		Protein of unknown function (DUF295)	-0.771984	0.00943716	biological_process
AT3G22580		Bifunctional inhibitor/lipid-transfer protein/seed storage 2S albumin superfamily protein	-0.772218	0.00702886	lipid transport
AT5G37830	OXP1	oxoprolinase 1	-0.772816	3.01e-07	glutathione catabolic process
AT1G09890		Rhamnogalacturonate lyase family protein	-0.773823	0.000166672	biological_process
AT3G63280	NEK4	NIMA-related kinase 4	-0.77404	3.67e-05	protein phosphorylation
AT3G22910		ATPase E1-E2 type family protein / haloacid dehalogenase-like hydrolase family protein	-0.775129	0.00831983	ATP biosynthetic process // cation transport // calcium ion transport // cellular zinc ion homeostasis // metabolic process // response to nematode // calcium ion transmembrane transport
AT3G05600		alpha/beta-Hydrolases superfamily protein	-0.775977	0.000798798	---
AT4G36520		Chaperone DnaJ-domain superfamily protein	-0.776401	0.00139541	---
AT5G23490			-0.776814	1.18e-05	biological_process
AT2G17040	NAC036	NAC domain containing protein 36	-0.777752	4.01e-05	MAPK cascade // regulation of transcription, DNA-dependent // multicellular organismal development // defense response, incompatible interaction // leaf morphogenesis // response to chitin // negative regulation of cell size // inflorescence morphogenesis
AT5G65550		UDP-Glycosyltransferase superfamily protein	-0.778019	0.00018115	metabolic process
AT5G66320	GATA5	GATA transcription factor 5	-0.778858	0.000245881	regulation of transcription, DNA-dependent // positive regulation of transcription, DNA-dependent
AT5G65130		Integrase-type DNA-binding superfamily protein	-0.77886	5.67e-05	regulation of transcription, DNA-dependent // regulation of transcription, DNA-dependent
AT4G22760		Tetratricopeptide repeat (TPR)-like superfamily protein	-0.779817	7.61e-06	biological_process
AT1G69720	HO3	heme oxygenase 3	-0.779844	0.000905517	heme oxidation // heme oxidation // oxidation-reduction process
AT2G19710		Regulator of Vps4 activity in the MVB pathway protein	-0.781274	9.31e-05	biological_process
AT3G59570		Ypt/Rab-GAP domain of gyp1p superfamily protein	-0.781918	1.17e-05	regulation of Rab GTPase activity
AT2G17120	LYM2	lysm domain GPI-anchored protein 2 precursor	-0.782343	0.000141641	systemic acquired resistance // cell wall macromolecule catabolic process // cell wall macromolecule catabolic process // response to endoplasmic reticulum stress
AT5G51400		PLAC8 family protein	-0.78261	1.32e-06	biological_process
AT2G44910	HB4	homeobox-leucine zipper protein 4	-0.782761	0.00714427	transcription, DNA-dependent // regulation of transcription, DNA-dependent // regulation of transcription, DNA-dependent // regulation of transcription, DNA-dependent // shade avoidance // response to hormone stimulus // response to far red light
AT4G30980	LRL2	LJRHL1-like 2	-0.783194	2.27e-05	regulation of transcription, DNA-dependent // regulation of transcription, DNA-dependent // root hair cell development
AT1G77330		2-oxoglutarate (2OG) and Fe(II)-dependent oxygenase superfamily protein	-0.783892	0.010036	iron ion transport // ethylene biosynthetic process // cellular response to iron ion starvation // response to nitrate // nitrate transport // brassinosteroid biosynthetic process // oxidation-reduction process
AT1G02930	GSTF6	glutathione S-transferase 6	-0.783994	0.00504036	response to stress // response to oxidative stress // response to oxidative stress // toxin catabolic process // response to water deprivation // response to salt stress // defense response to bacterium // response to cadmium ion
AT1G65850		Disease resistance protein (TIR-NBS-LRR class) family	-0.784385	3.55e-05	defense response // defense response // signal transduction
AT1G05040			-0.785466	0.00303134	biological_process
AT4G04960		Concanavalin A-like lectin protein kinase family protein	-0.785586	0.00578225	protein phosphorylation
AT3G07060	emb1974	NHL domain-containing protein	-0.786477	0.000254599	methylation-dependent chromatin silencing // embryo development ending in seed dormancy // chromatin silencing by small RNA // histone H3-K9 methylation
AT2G35650	CSLA7	cellulose synthase like	-0.78691	1.1e-06	MAPK cascade // regulation of response to biotic stimulus // protein targeting to membrane // detection of biotic stimulus // salicylic acid biosynthetic process // systemic acquired resistance, salicylic acid mediated signaling pathway // jasmonic acid mediated signaling pathway // response to chitin // regulation of hydrogen peroxide metabolic process // regulation of plant-type hypersensitive …
AT1G13330	AHP2	Arabidopsis Hop2 homolog	-0.789752	0.00222332	#N/A
AT2G27390		proline-rich family protein	-0.789845	0.000277455	biological_process
AT5G40316		other RNA	-0.789969	3.82e-05	---
AT5G54650	Fh5	formin homology5	-0.790233	0.000142618	endosperm development // cellular component organization // actin cytoskeleton organization // actin filament polymerization // actin nucleation // seed morphogenesis
AT5G44460	CML43	calmodulin like 43	-0.790541	3.35e-05	response to cadmium ion
AT5G22840		Protein kinase superfamily protein	-0.791025	0.000180407	protein phosphorylation // embryo sac egg cell differentiation
AT4G30230			-0.791313	0.00100933	biological_process
AT5G35580		Protein kinase superfamily protein	-0.791673	0.000101001	protein phosphorylation
AT2G36026		Ovate family protein	-0.791912	0.000411924	biological_process
AT4G01010	CNGC13	cyclic nucleotide-gated channel 13	-0.792887	6.23e-05	protein targeting to membrane // ion transport // ethylene biosynthetic process // salicylic acid biosynthetic process // salicylic acid mediated signaling pathway // response to chitin // regulation of plant-type hypersensitive response // negative regulation of defense response // negative regulation of programmed cell death // innate immune response // defense response to fungus // transmembra…
AT5G17210		Protein of unknown function (DUF1218)	-0.793092	0.000175279	biological_process
AT1G72700		ATPase E1-E2 type family protein / haloacid dehalogenase-like hydrolase family protein	-0.793299	0.000649	cation transport // metabolic process // phospholipid transport
AT4G24800	ECIP1	MA3 domain-containing protein	-0.794043	0.0003031	response to salt stress // response to ethylene stimulus
AT1G78922			-0.794281	0.000474754	biological_process
AT4G27270		Quinone reductase family protein	-0.794324	1.44e-05	negative regulation of transcription, DNA-dependent
AT5G01900	WRKY62	WRKY DNA-binding protein 62	-0.794521	0.00182145	regulation of transcription, DNA-dependent // regulation of transcription, DNA-dependent // salicylic acid mediated signaling pathway // defense response to bacterium
AT1G13680		PLC-like phosphodiesterases superfamily protein	-0.795619	2.77e-05	#N/A
AT4G11840	PLDGAMMA3	phospholipase D gamma 3	-0.795627	1.62e-05	metabolic process // phosphatidylcholine metabolic process
AT1G04050	SUVR1	homolog of SU(var)3-9 1	-0.796088	0.000385427	determination of bilateral symmetry // organ morphogenesis // xylem and phloem pattern formation // histone lysine methylation // flower morphogenesis // petal formation // sepal formation // negative regulation of biological process
AT1G62500		Bifunctional inhibitor/lipid-transfer protein/seed storage 2S albumin superfamily protein	-0.796434	0.0103439	lipid transport // lipid transport
AT4G12280		copper amine oxidase family protein	-0.796526	0.000862292	amine metabolic process // oxidation-reduction process
AT5G47920			-0.797178	3.9e-05	biological_process
AT4G29810	MKK2	MAP kinase kinase 2	-0.797231	4.43e-06	MAPK cascade // MAPK cascade // MAPK cascade // regulation of response to biotic stimulus // glycolysis // regulation of transcription, DNA-dependent // protein phosphorylation // protein targeting to membrane // water transport // response to osmotic stress // hyperosmotic response // Golgi organization // cell communication // response to temperature stimulus // response to cold // response to …
AT2G29940	PDR3	pleiotropic drug resistance 3	-0.797331	2.09e-05	drug transmembrane transport
AT5G50200	WR3	nitrate transmembrane transporters	-0.797722	0.00361305	protein targeting to membrane // anion transport // nucleotide transport // amino acid transport // ER to Golgi vesicle-mediated transport // cellular membrane fusion // response to wounding // systemic acquired resistance // response to nitrate // response to nitrate // regulation of plant-type hypersensitive response // ammonium transport // nitrate transport // nitrate transport // basic amino…
AT1G13530		Protein of unknown function (DUF1262)	-0.797956	0.00220319	biological_process
AT3G20420	RTL2	RNAse THREE-like protein 2	-0.798439	1.18e-05	RNA processing // production of ta-siRNAs involved in RNA interference // production of miRNAs involved in gene silencing by miRNA // defense response to virus
AT5G52990		SNARE-like superfamily protein	-0.799027	0.000844761	transport
AT1G70870		Polyketide cyclase/dehydrase and lipid transport superfamily protein	-0.799348	7.82e-05	defense response // response to biotic stimulus
AT4G28390	ATAAC3	ADP/ATP carrier 3	-0.799688	0.000861921	transport // transport // mitochondrial transport // systemic acquired resistance // purine nucleotide transport // response to endoplasmic reticulum stress // transmembrane transport
AT5G54095			-0.800426	2.21e-05	---
AT1G23340		Protein of Unknown Function (DUF239)	-0.800832	0.00133543	biological_process
AT4G28490	RLK5	Leucine-rich receptor-like protein kinase family protein	-0.801157	0.000139689	response to molecule of bacterial origin // protein phosphorylation // protein phosphorylation // signal transduction // transmembrane receptor protein tyrosine kinase signaling pathway // response to bacterium // stomatal complex morphogenesis // innate immune response // protein autophosphorylation // stamen development
AT3G17626		structural constituent of ribosome	-0.801747	0.000377515	translation
AT4G02800			-0.801951	0.00023423	microtubule cytoskeleton organization // cytokinesis by cell plate formation // biological_process // histone phosphorylation // regulation of cell proliferation
AT1G04920	SPS3F	sucrose phosphate synthase 3F	-0.804017	2.77e-05	response to hypoxia // sucrose metabolic process // biosynthetic process // galactolipid biosynthetic process
AT1G75420		UDP-Glycosyltransferase superfamily protein	-0.804413	7.16e-06	response to hypoxia // biosynthetic process // galactolipid biosynthetic process
AT2G26310		Chalcone-flavanone isomerase family protein	-0.804827	2.25e-05	cellular modified amino acid biosynthetic process
AT3G20600	NDR1	Late embryogenesis abundant (LEA) hydroxyproline-rich glycoprotein family	-0.806768	0.000474605	defense response // plant-type hypersensitive response // defense response, incompatible interaction // defense response to bacterium, incompatible interaction // defense response to fungus, incompatible interaction // defense response to bacterium
AT1G48605	HAL3B	Flavoprotein	-0.807248	4.17e-06	coenzyme A biosynthetic process // hyperosmotic salinity response
AT4G28800		basic helix-loop-helix (bHLH) DNA-binding superfamily protein	-0.807256	0.000479881	regulation of transcription, DNA-dependent
AT2G18000	TAF14	TBP-associated factor 14	-0.807743	4.23e-05	regulation of transcription, DNA-dependent // regulation of transcription, DNA-dependent
AT3G45200			-0.808032	0.00768852	biological_process
AT3G49370		Calcium-dependent protein kinase (CDPK) family protein	-0.808348	0.00055016	protein phosphorylation // N-terminal protein myristoylation // endoplasmic reticulum unfolded protein response
AT3G56400	WRKY70	WRKY DNA-binding protein 70	-0.80854	0.000931987	MAPK cascade // response to hypoxia // respiratory burst involved in defense response // regulation of response to biotic stimulus // regulation of transcription, DNA-dependent // regulation of transcription, DNA-dependent // regulation of transcription, DNA-dependent // protein targeting to membrane // cellular membrane fusion // response to cold // detection of biotic stimulus // response to ba…
AT2G14580	PRB1	basic pathogenesis-related protein 1	-0.809217	0.000743553	response to ethylene stimulus // response to salicylic acid stimulus // response to jasmonic acid stimulus
AT5G64401			-0.809535	0.00991613	---
AT1G62300	WRKY6	WRKY family transcription factor	-0.810161	0.000221287	respiratory burst involved in defense response // regulation of transcription, DNA-dependent // regulation of transcription, DNA-dependent // toxin catabolic process // response to chitin // response to chitin // response to cyclopentenone // cellular response to phosphate starvation // intracellular signal transduction // amino acid import // negative regulation of transcription, DNA-dependent /…
AT1G28640		GDSL-like Lipase/Acylhydrolase superfamily protein	-0.810418	3.09e-05	lipid metabolic process
AT1G62320		ERD (early-responsive to dehydration stress) family protein	-0.810789	0.000864088	biological_process
AT1G21520			-0.812002	5.36e-05	response to oxidative stress
AT1G78730		FBD, F-box, Skp2-like and Leucine Rich Repeat domains containing protein	-0.815188	1.17e-06	biological_process
AT5G52070		Agenet domain-containing protein	-0.816104	1.08e-05	biological_process
AT5G24510		60S acidic ribosomal protein family	-0.816156	0.00342015	translational elongation // translational elongation
AT1G29330	ERD2	ER lumen protein retaining receptor family protein	-0.818127	0.000444486	protein retention in ER lumen // protein retention in ER lumen // autophagy // response to water deprivation // protein transport // hyperosmotic salinity response
AT3G62590		alpha/beta-Hydrolases superfamily protein	-0.819721	0.00203795	lipid metabolic process // lipid metabolic process // cellular response to phosphate starvation // galactolipid biosynthetic process // cellular response to water deprivation
AT1G76110		HMG (high mobility group) box protein with ARID/BRIGHT DNA-binding domain	-0.819922	0.00217351	MAPK cascade // chromatin assembly or disassembly // regulation of transcription, DNA-dependent // regulation of transcription, DNA-dependent // protein targeting to membrane // response to bacterium // systemic acquired resistance, salicylic acid mediated signaling pathway // jasmonic acid mediated signaling pathway // leaf morphogenesis // regulation of hydrogen peroxide metabolic process // re…
AT5G02380	MT2B	metallothionein 2B	-0.820751	4.77e-06	glucose catabolic process // response to osmotic stress // biological_process // response to cadmium ion
AT5G37000		Exostosin family protein	-0.821472	0.000103546	biological_process
AT5G44390		FAD-binding Berberine family protein	-0.821678	0.00291604	amino acid transport // oxidation-reduction process
AT5G42690		Protein of unknown function, DUF547	-0.822792	0.000520579	---
AT5G62998			-0.823651	0.000776757	biological_process
AT3G08990		Yippee family putative zinc-binding protein	-0.823836	1.41e-06	biological_process
AT1G21250	WAK1	cell wall-associated kinase	-0.824897	0.000232851	#N/A
AT4G03570		Cystatin/monellin superfamily protein	-0.825845	0.000118758	biological_process
AT2G41380		S-adenosyl-L-methionine-dependent methyltransferases superfamily protein	-0.826389	0.00877617	metabolic process // toxin catabolic process // response to cyclopentenone // response to cadmium ion
AT3G17630	CHX19	cation/H+ exchanger 19	-0.826959	1.44e-05	cation transport // cation transport // regulation of pH // transmembrane transport
AT3G59210		F-box/RNI-like superfamily protein	-0.82696	2.78e-05	biological_process
AT4G17695	KAN3	Homeodomain-like superfamily protein	-0.827317	0.00126633	regulation of transcription, DNA-dependent
AT1G68935			-0.82775	0.000210022	biological_process
AT3G22070		proline-rich family protein	-0.828287	0.000142625	biological_process
AT4G02220		zinc finger (MYND type) family protein / programmed cell death 2 C-terminal domain-containing protein	-0.82894	0.00013273	---
AT1G64630	WNK10	with no lysine (K) kinase 10	-0.830239	7.63e-07	protein phosphorylation
AT1G63050		MBOAT (membrane bound O-acyl transferase) family protein	-0.83044	5.06e-05	---
AT5G17580		Phototropic-responsive NPH3 family protein	-0.830674	0.00270292	response to light stimulus // response to light stimulus
AT1G31200	PP2-A9	phloem protein 2-A9	-0.830955	0.00496771	---
AT5G56960		basic helix-loop-helix (bHLH) DNA-binding family protein	-0.831673	0.00479932	regulation of transcription, DNA-dependent // response to chitin
AT1G48635	PEX3-2	peroxin 3	-0.831968	4.3e-07	peroxisome organization // peroxisome organization
AT4G27860		vacuolar iron transporter (VIT) family protein	-0.832785	0.000303522	biological_process
AT4G02390	PP	poly(ADP-ribose) polymerase	-0.834863	1.39e-05	double-strand break repair // protein ADP-ribosylation // protein ADP-ribosylation // response to gamma radiation
AT3G44190		FAD/NAD(P)-binding oxidoreductase family protein	-0.835657	4.19e-06	toxin catabolic process // response to chitin // response to cyclopentenone // hydrogen peroxide catabolic process // para-aminobenzoic acid metabolic process // oxidation-reduction process
AT5G42010		Transducin/WD40 repeat-like superfamily protein	-0.835976	0.000753332	signal transduction // endoplasmic reticulum unfolded protein response
AT2G21580		Ribosomal protein S25 family protein	-0.838124	1.3e-06	RNA methylation // translation
AT5G54850			-0.839302	6.89e-05	biological_process
AT5G06960	TGA5	OCS-element binding factor 5	-0.840456	1.68e-07	response to superoxide // regulation of transcription, DNA-dependent // RNA processing // cell death // response to xenobiotic stimulus // response to xenobiotic stimulus // response to bacterium // response to salt stress // response to auxin stimulus // response to abscisic acid stimulus // response to carbohydrate stimulus // defense response, incompatible interaction // systemic acquired resi…
AT1G30300		Metallo-hydrolase/oxidoreductase superfamily protein	-0.841033	1.06e-08	biological_process
AT1G30755		Protein of unknown function (DUF668)	-0.84104	0.000630167	biological_process
AT2G17780	MCA2	PLAC8 family protein	-0.841114	0.000207077	post-embryonic root development // calcium ion import
AT5G18670	BMY3	beta-amylase 3	-0.841155	0.00677531	polysaccharide catabolic process // carbohydrate metabolic process
AT4G12120	SEC1B	Sec1/munc18-like (SM) proteins superfamily	-0.841758	0.00140769	vesicle docking involved in exocytosis // protein secretion // vesicle-mediated transport // defense response by callose deposition
AT1G23010	LPR1	Cupredoxin superfamily protein	-0.841777	2.28e-05	#N/A
AT3G04220		Disease resistance protein (TIR-NBS-LRR class) family	-0.841947	0.00603444	defense response // defense response // signal transduction
AT1G51960	IQD27	IQ-domain 27	-0.843295	8.52e-05	biological_process
AT1G21930			-0.843446	0.00422965	#N/A
AT3G58000		VQ motif-containing protein	-0.84375	5.28e-05	biological_process
AT1G01660		RING/U-box superfamily protein	-0.843779	5.5e-05	protein ubiquitination
AT1G09415	NIMIN-3	NIM1-interacting 3	-0.844397	0.0001363	biological_process
AT2G36305	RCE1	farnesylated protein-converting enzyme 2	-0.845392	2.81e-06	proteolysis // protein processing // cellular protein localization // CAAX-box protein maturation
AT5G06750		Protein phosphatase 2C family protein	-0.846035	1.19e-06	protein dephosphorylation
AT4G25630	FIB2	fibrillarin 2	-0.846444	0.00301639	RNA methylation // RNA methylation // purine nucleotide biosynthetic process // rRNA processing // rRNA processing // rRNA processing // tRNA processing // nucleotide biosynthetic process // pyrimidine ribonucleotide biosynthetic process
AT4G39890	RABH1c	RAB GTPase homolog H1C	-0.846698	0.00185568	N-terminal protein myristoylation // intra-Golgi vesicle-mediated transport // cellular membrane fusion // ER-nucleus signaling pathway // small GTPase mediated signal transduction // salicylic acid biosynthetic process // abscisic acid mediated signaling pathway // systemic acquired resistance, salicylic acid mediated signaling pathway // salicylic acid mediated signaling pathway // protein tran…
AT2G41070	EEL	Basic-leucine zipper (bZIP) transcription factor family protein	-0.847087	9.85e-05	regulation of transcription, DNA-dependent // regulation of transcription, DNA-dependent // response to xenobiotic stimulus // abscisic acid mediated signaling pathway // abscisic acid mediated signaling pathway // endoplasmic reticulum unfolded protein response // positive regulation of transcription, DNA-dependent // positive regulation of cellular process
AT2G45490	AUR3	ataurora3	-0.848395	0.000522357	G2 phase of mitotic cell cycle // microtubule cytoskeleton organization // cytokinesis by cell plate formation // chromatin silencing // protein phosphorylation // protein phosphorylation // photomorphogenesis // cullin deneddylation // protein ubiquitination // histone methylation // histone phosphorylation // histone phosphorylation // protein deubiquitination // cell cycle process // histone H…
AT3G07520	GLR1.4	glutamate receptor 1.4	-0.848806	2.47e-06	transport // calcium ion transport // cellular calcium ion homeostasis // response to light stimulus // cellular cation homeostasis // cellular cation homeostasis
AT4G27080	PDIL5-4	PDI-like 5-4	-0.849146	1.74e-07	second-messenger-mediated signaling // cell redox homeostasis
AT4G20820		FAD-binding Berberine family protein	-0.849206	7.48e-05	oxidation-reduction process
AT4G24710		P-loop containing nucleoside triphosphate hydrolases superfamily protein	-0.84924	4.85e-07	---
AT2G32645		Domain of unknown function (DUF313)	-0.849631	0.000421337	biological_process
AT1G63530			-0.850625	0.00295462	pollen tube growth
AT3G17690	CNGC19	cyclic nucleotide gated channel 19	-0.851208	0.000210964	ion transport // transmembrane transport
AT2G17620	CYCB2;1	Cyclin B2;1	-0.851282	3.25e-05	regulation of cyclin-dependent protein kinase activity // DNA replication // DNA methylation // cell proliferation // stomatal lineage progression // histone H3-K9 methylation // regulation of cell cycle // regulation of cell cycle
AT4G22780	ACR7	ACT domain repeat 7	-0.852078	0.000397447	metabolic process
AT1G07901			-0.8524	1.84e-05	biological_process
AT4G36460			-0.852499	0.0042393	biological_process
AT5G24200		alpha/beta-Hydrolases superfamily protein	-0.852919	0.00530724	lipid metabolic process
AT5G53550	YSL3	YELLOW STRIPE like 3	-0.853109	0.000458525	developmental process involved in reproduction // oligopeptide transport // response to nematode // seed development // transmembrane transport
AT5G09690	MRS2-7	magnesium transporter 7	-0.854269	0.000191773	metal ion transport // metal ion transport // transmembrane transport
AT1G15370		SNARE-like superfamily protein	-0.854592	7.06e-07	#N/A
AT1G24145			-0.854607	0.00100939	#N/A
AT1G67920			-0.855264	0.00375306	biological_process
AT3G26600	ARO4	armadillo repeat only 4	-0.855873	0.000146351	biological_process
AT1G68710		ATPase E1-E2 type family protein / haloacid dehalogenase-like hydrolase family protein	-0.855956	6.25e-05	cation transport // metabolic process // phospholipid transport
AT4G18490			-0.856204	7.25e-05	biological_process
AT1G04090		Plant protein of unknown function (DUF946)	-0.856546	3.56e-05	#N/A
AT4G04450	WRKY42	WRKY family transcription factor	-0.857352	0.000796839	regulation of transcription, DNA-dependent // regulation of transcription, DNA-dependent // negative regulation of transcription, DNA-dependent
AT3G27510		Cysteine/Histidine-rich C1 domain family protein	-0.858326	0.000200778	biological_process // oxidation-reduction process
AT4G23030		MATE efflux family protein	-0.858742	0.00424418	drug transmembrane transport // transmembrane transport
AT2G31110	TBL40	Plant protein of unknown function (DUF828)	-0.85878	0.00185088	biological_process
AT5G46350	WRKY8	WRKY DNA-binding protein 8	-0.858792	9e-06	regulation of transcription, DNA-dependent // regulation of transcription, DNA-dependent // response to abscisic acid stimulus // defense response to bacterium // defense response to fungus // cellular response to hydrogen peroxide
AT4G22070	WRKY31	WRKY DNA-binding protein 31	-0.858844	5.99e-05	regulation of transcription, DNA-dependent // regulation of transcription, DNA-dependent
AT2G40205		Ribosomal protein L41 family	-0.859142	6.07e-05	translation // translation
AT5G44568			-0.859556	5.01e-05	biological_process
AT2G47190	MYB2	myb domain protein 2	-0.859913	0.00324536	signal transduction // response to cold // response to water deprivation // response to water deprivation // response to wounding // response to salt stress // response to ethylene stimulus // response to ethylene stimulus // response to auxin stimulus // response to abscisic acid stimulus // response to abscisic acid stimulus // response to abscisic acid stimulus // abscisic acid mediated signal…
AT2G33580		Protein kinase superfamily protein	-0.860009	4.97e-05	protein phosphorylation // response to chitin // cell wall macromolecule catabolic process
AT1G51760	JR3	peptidase M20/M25/M40 family protein	-0.860776	5.83e-07	proteolysis // metabolic process // response to wounding
AT3G57260	PR2	beta-1,3-glucanase 2	-0.860937	0.00500931	MAPK cascade // respiratory burst involved in defense response // regulation of response to biotic stimulus // carbohydrate metabolic process // protein targeting to membrane // cellular membrane fusion // response to cold // detection of biotic stimulus // systemic acquired resistance // systemic acquired resistance // systemic acquired resistance // salicylic acid biosynthetic process // anthoc…
AT4G39670		Glycolipid transfer protein (GLTP) family protein	-0.863175	0.00311495	respiratory burst involved in defense response // protein targeting to membrane // ER-nucleus signaling pathway // salicylic acid biosynthetic process // response to ethylene stimulus // abscisic acid mediated signaling pathway // salicylic acid mediated signaling pathway // jasmonic acid mediated signaling pathway // response to chitin // heat acclimation // regulation of plant-type hypersensiti…
AT3G52390		TatD related DNase	-0.86398	0.000560628	---
AT3G54960	PDIL1-3	PDI-like 1-3	-0.864533	0.000368457	protein folding // glycerol ether metabolic process // response to heat // systemic acquired resistance // response to high light intensity // response to sucrose stimulus // response to glucose stimulus // response to fructose stimulus // response to endoplasmic reticulum stress // response to endoplasmic reticulum stress // response to hydrogen peroxide // cell redox homeostasis
AT4G32730	PC-MYB1	Homeodomain-like protein	-0.864587	2.07e-05	cytokinesis by cell plate formation // regulation of transcription, DNA-dependent // regulation of transcription, DNA-dependent
AT3G09490		Tetratricopeptide repeat (TPR)-like superfamily protein	-0.864839	0.000680878	photosynthesis, light reaction
AT4G12440	APT4	adenine phosphoribosyl transferase 4	-0.864881	0.00530363	adenine salvage // adenine salvage // nucleoside metabolic process
AT3G13080	MRP3	multidrug resistance-associated protein 3	-0.865677	6.02e-05	transport // transmembrane transport
AT2G46070	MPK12	mitogen-activated protein kinase 12	-0.865763	5.74e-08	protein phosphorylation // signal transduction // intracellular protein kinase cascade // response to auxin stimulus // response to indolebutyric acid stimulus
AT4G30870	MUS81	Restriction endonuclease, type II-like superfamily protein	-0.867413	0.000135493	double-strand break repair via homologous recombination // double-strand break repair via homologous recombination // DNA repair // DNA repair // double-strand break repair // mitotic recombination // mitotic recombination // regulation of transcription, DNA-dependent // RNA processing // response to DNA damage stimulus // sister chromatid cohesion // synapsis // reciprocal meiotic recombination …
AT1G14880	PCR1	PLANT CADMIUM RESISTANCE 1	-0.868258	9.74e-07	biological_process
AT4G22790		MATE efflux family protein	-0.868339	9.32e-06	drug transmembrane transport // transmembrane transport
AT3G48310	CYP71A22	cytochrome P450, family 71, subfamily A, polypeptide 22	-0.868595	0.00061481	oxidation-reduction process
AT5G12380	ANNAT8	annexin 8	-0.86898	6.99e-05	response to heat // response to cold // response to water deprivation // response to salt stress
AT4G22280		F-box/RNI-like superfamily protein	-0.871139	1.3e-06	biological_process
AT2G44460	BGLU28	beta glucosidase 28	-0.871457	0.00208572	carbohydrate metabolic process // response to karrikin
AT2G20110		Tesmin/TSO1-like CXC domain-containing protein	-0.872125	4.19e-05	---
AT4G16940		Disease resistance protein (TIR-NBS-LRR class) family	-0.872278	0.000271136	defense response // defense response // signal transduction
AT1G64185		Lactoylglutathione lyase / glyoxalase I family protein	-0.872315	0.00820422	metabolic process
AT2G28960		Leucine-rich repeat protein kinase family protein	-0.872422	0.00193453	transition metal ion transport // protein phosphorylation // iron ion transport // response to zinc ion // cellular response to iron ion starvation // response to nitrate // nitrate transport
AT5G14870	CNGC18	cyclic nucleotide-gated channel 18	-0.872942	1.15e-05	cellular calcium ion homeostasis // plant-type cell wall modification // pollen tube growth // pollen tube growth // cellular process involved in reproduction // pollen tube development
AT5G61980	AGD1	ARF-GAP domain 1	-0.872979	3.87e-07	cytoskeleton organization // regulation of ARF GTPase activity // cellular process involved in reproduction // pollen tube development
AT3G11840	PUB24	plant U-box 24	-0.873485	0.000135947	MAPK cascade // respiratory burst involved in defense response // respiratory burst involved in defense response // regulation of response to biotic stimulus // N-terminal protein myristoylation // protein targeting to membrane // cellular membrane fusion // defense response // detection of biotic stimulus // systemic acquired resistance // ethylene biosynthetic process // salicylic acid biosynth…
AT5G49630	AAP6	amino acid permease 6	-0.874988	0.00180007	aspartate transport // tryptophan transport
AT1G47840	HXK3	hexokinase 3	-0.876914	0.00293108	carbohydrate metabolic process // glycolysis
AT1G29860	WRKY71	WRKY DNA-binding protein 71	-0.876972	0.00145034	regulation of transcription, DNA-dependent // regulation of transcription, DNA-dependent
AT3G44660	hda10	histone deacetylase 10	-0.877905	0.000303238	---
AT1G74440		Protein of unknown function (DUF962)	-0.878394	7e-05	biological_process // systemic acquired resistance // regulation of defense response
AT4G00020	MEE43	BREAST CANCER 2 like 2A	-0.878513	8.96e-06	double-strand break repair via homologous recombination // DNA repair // double-strand break repair // double-strand break repair // DNA recombination // regulation of transcription, DNA-dependent // regulation of S phase of mitotic cell cycle // meiosis // embryo sac development // embryo development ending in seed dormancy // response to ionizing radiation // regulation of defense response // e…
AT4G23700	CHX17	cation/H+ exchanger 17	-0.878697	0.00874175	protein targeting to vacuole // cation transport // cation transport // regulation of pH // toxin catabolic process // organ senescence // response to cyclopentenone // transmembrane transport
AT1G50180		NB-ARC domain-containing disease resistance protein	-0.878833	0.00989927	defense response // defense response
AT3G01710		TPX2 (targeting protein for Xklp2) protein family	-0.879564	4.25e-05	biological_process
AT4G18010	IP5PII	myo-inositol polyphosphate 5-phosphatase 2	-0.881465	0.00033696	signal transduction // response to water deprivation // response to wounding // response to ethylene stimulus // response to auxin stimulus // response to abscisic acid stimulus // abscisic acid mediated signaling pathway // response to jasmonic acid stimulus // seed germination // inositol trisphosphate metabolic process // inositol trisphosphate metabolic process // hyperosmotic salinity respon…
AT1G12100		Bifunctional inhibitor/lipid-transfer protein/seed storage 2S albumin superfamily protein	-0.881827	0.0073784	#N/A
AT1G72900		Toll-Interleukin-Resistance (TIR) domain-containing protein	-0.881849	0.00115532	protein targeting to membrane // defense response // signal transduction // response to symbiotic fungus // response to insect // ethylene biosynthetic process // systemic acquired resistance, salicylic acid mediated signaling pathway // salicylic acid mediated signaling pathway // regulation of plant-type hypersensitive response // negative regulation of defense response // negative regulation o…
AT2G46080			-0.881983	2.73e-07	embryo development
AT5G38240		Protein kinase family protein	-0.882337	0.00272719	protein phosphorylation
AT5G05435		other RNA	-0.883667	0.00211252	---
AT3G55950	CCR3	CRINKLY4 related 3	-0.884025	1.65e-05	protein phosphorylation // protein targeting to membrane // cellular membrane fusion // response to ethylene stimulus // abscisic acid mediated signaling pathway // regulation of plant-type hypersensitive response // intracellular signal transduction // negative regulation of programmed cell death
AT1G68700			-0.884152	5.91e-06	biological_process
AT1G64480	CBL8	calcineurin B-like protein 8	-0.884373	5.54e-07	calcium-mediated signaling // calcium-mediated signaling
AT4G19200		proline-rich family protein	-0.884731	6.2e-07	---
AT4G04220	RLP46	receptor like protein 46	-0.88619	2.14e-06	MAPK cascade // regulation of transcription, DNA-dependent // protein targeting to membrane // defense response // signal transduction // response to bacterium // systemic acquired resistance, salicylic acid mediated signaling pathway // jasmonic acid mediated signaling pathway // regulation of hydrogen peroxide metabolic process // regulation of plant-type hypersensitive response // negative reg…
AT5G24230		Lipase class 3-related protein	-0.886366	0.000847407	lipid metabolic process // amino acid transport
AT4G34900	XDH2	xanthine dehydrogenase 2	-0.886594	0.00533374	oxidation-reduction process
AT2G30480			-0.88663	0.00399766	protein folding // biological_process // response to heat // response to high light intensity // response to hydrogen peroxide
AT1G61160			-0.88664	0.000393914	biological_process
AT2G19040	RALFL12	RALF-like 12	-0.886643	0.000304561	cell-cell signaling
AT3G25905	CLE27	CLAVATA3/ESR-RELATED 27	-0.887979	0.00210917	signal transduction
AT3G09010		Protein kinase superfamily protein	-0.88888	0.0012016	response to molecule of bacterial origin // protein phosphorylation // detection of external stimulus // detection of biotic stimulus // response to chitin
AT5G24960	CYP71A14	cytochrome P450, family 71, subfamily A, polypeptide 14	-0.889509	0.000100789	oxidation-reduction process
AT1G78770	APC6	anaphase promoting complex 6	-0.890821	7.86e-07	M phase of mitotic cell cycle // nuclear division // double-strand break repair via homologous recombination // cytokinesis by cell plate formation // DNA replication // DNA-dependent DNA replication // DNA-dependent DNA replication initiation // regulation of DNA replication // DNA methylation // methylation-dependent chromatin silencing // regulation of transcription, DNA-dependent // cell cycl…
AT4G12860	UNE14	EF hand calcium-binding protein family	-0.891004	0.000454712	double fertilization forming a zygote and endosperm // plant-type cell wall modification // pollen tube growth
AT5G36970	NHL25	NDR1/HIN1-like 25	-0.891678	0.00429269	defense response, incompatible interaction // salicylic acid mediated signaling pathway
AT3G29410		Terpenoid cyclases/Protein prenyltransferases superfamily protein	-0.891703	6.3e-05	metabolic process // cytokinin mediated signaling pathway
AT1G73680	ALPHA DOX2	alpha dioxygenase	-0.892082	2.17e-05	long-chain fatty acid metabolic process // fatty acid metabolic process // response to oxidative stress // leaf senescence // response to other organism // oxidation-reduction process
AT3G43840		3-oxo-5-alpha-steroid 4-dehydrogenase family protein	-0.892501	0.000703958	lipid metabolic process
AT1G79680	WAKL10	WALL ASSOCIATED KINASE (WAK)-LIKE 10	-0.894189	0.00517044	cGMP biosynthetic process // protein phosphorylation // protein phosphorylation // defense response // response to bacterium // response to fungus // response to ethylene stimulus // response to salicylic acid stimulus
AT1G52920	GPCR	G protein coupled receptor	-0.894533	1.1e-05	regulation of abscisic acid mediated signaling pathway // maintenance of seed dormancy
AT1G08420	BSL2	BRI1 suppressor 1 (BSU1)-like 2	-0.894886	1.37e-05	#N/A
AT5G41180		leucine-rich repeat transmembrane protein kinase family protein	-0.895987	0.000158847	protein phosphorylation // protein phosphorylation // transmembrane receptor protein tyrosine kinase signaling pathway
AT1G49050		Eukaryotic aspartyl protease family protein	-0.896306	2.5e-06	N-terminal protein myristoylation // proteolysis // proteolysis
AT5G03260	LAC11	laccase 11	-0.896783	7.83e-05	glucuronoxylan metabolic process // xylan biosynthetic process // lignin catabolic process // oxidation-reduction process
AT1G61490		S-locus lectin protein kinase family protein	-0.896931	0.00625908	protein phosphorylation // recognition of pollen
AT5G37570		Pentatricopeptide repeat (PPR-like) superfamily protein	-0.897463	0.00722088	biological_process
AT4G12080	ATAHL1	AT-hook motif nuclear-localized protein 1	-0.897731	1.16e-05	brassinosteroid biosynthetic process
AT5G42380	CML39	calmodulin like 37	-0.897919	0.00841864	ethylene biosynthetic process // response to ozone // heat acclimation // endoplasmic reticulum unfolded protein response // defense response by callose deposition
AT1G17610		Disease resistance protein (TIR-NBS class)	-0.899344	0.000189489	#N/A
AT5G61190		putative endonuclease or glycosyl hydrolase with C2H2-type zinc finger domain	-0.899801	9.71e-08	---
AT5G41680		Protein kinase superfamily protein	-0.900162	0.000130634	protein phosphorylation
AT1G20350	TIM17-1	translocase inner membrane subunit 17-1	-0.900186	0.000632714	#N/A
AT1G52590		Putative thiol-disulphide oxidoreductase DCC	-0.900572	0.000412932	biological_process
AT3G12070	RGTB2	RAB geranylgeranyl transferase beta subunit 2	-0.90098	2.4e-05	---
AT3G51350		Eukaryotic aspartyl protease family protein	-0.901753	0.000250234	proteolysis // proteolysis
AT2G33130	RALFL18	ralf-like 18	-0.902251	0.00127865	cell-cell signaling
AT4G00955			-0.902396	0.000269285	biological_process
AT5G10100	TPPI	Haloacid dehalogenase-like hydrolase (HAD) superfamily protein	-0.902804	3.81e-05	trehalose biosynthetic process // trehalose biosynthetic process // metabolic process
AT4G14640	CAM8	calmodulin 8	-0.903269	0.010313	detection of calcium ion // response to mechanical stimulus // calcium-mediated signaling // calcium-mediated signaling // actin filament-based movement // Golgi localization // mitochondrion localization // peroxisome localization
AT5G51850			-0.903945	0.000884276	biological_process
AT5G07200	YAP169	gibberellin 20-oxidase 3	-0.904454	0.00104747	fatty acid catabolic process // gibberellin biosynthetic process // gibberellin biosynthetic process // gibberellin biosynthetic process // terpenoid biosynthetic process // oxidation-reduction process
AT3G56730		Putative endonuclease or glycosyl hydrolase	-0.904473	6.64e-06	biological_process
AT4G15075		FBD-like domain family protein	-0.905266	3.96e-05	biological_process
AT2G38860	YLS5	Class I glutamine amidotransferase-like superfamily protein	-0.905976	8.27e-05	tryptophan catabolic process // systemic acquired resistance // indoleacetic acid biosynthetic process // response to ethylene stimulus // response to abscisic acid stimulus // glucosinolate biosynthetic process // negative regulation of defense response // response to endoplasmic reticulum stress // defense response to bacterium
AT3G27480		Cysteine/Histidine-rich C1 domain family protein	-0.907166	3.17e-05	intracellular signal transduction // oxidation-reduction process
AT5G46390		Peptidase S41 family protein	-0.90726	9.27e-06	proteolysis // mRNA modification // intracellular signal transduction
AT1G80900	MRS2-10	magnesium transporter 1	-0.907262	3.47e-06	metal ion transport // metal ion transport // transmembrane transport
AT3G48320	CYP71A21	cytochrome P450, family 71, subfamily A, polypeptide 21	-0.907509	0.00168604	oxidation-reduction process
AT5G26940	DPD1	Polynucleotidyl transferase, ribonuclease H-like superfamily protein	-0.907533	1.57e-07	DNA catabolic process, exonucleolytic
AT1G48280		hydroxyproline-rich glycoprotein family protein	-0.909138	1.04e-05	biological_process
AT3G16565		alanine-tRNA ligases;nucleic acid binding;ligases, forming aminoacyl-tRNA and related compounds;nucleotide binding;ATP binding	-0.910708	0.00646223	alanyl-tRNA aminoacylation // tRNA aminoacylation
AT1G14860	NUDT18	nudix hydrolase homolog 18	-0.911075	0.000593411	#N/A
AT3G12830		SAUR-like auxin-responsive protein family	-0.912101	2.33e-05	response to auxin stimulus
AT4G01440		nodulin MtN21 /EamA-like transporter family protein	-0.912212	8.51e-05	---
AT5G18780		F-box/RNI-like superfamily protein	-0.915355	0.000121526	ER to Golgi vesicle-mediated transport // biological_process
AT5G44820		Nucleotide-diphospho-sugar transferase family protein	-0.916573	0.000421041	biological_process
AT2G16850	PIP3B	plasma membrane intrinsic protein 2;8	-0.917427	1.08e-05	transport // transport // water transport // response to abscisic acid stimulus // transmembrane transport
AT1G64360			-0.917572	9.91e-05	response to oxidative stress
AT3G60176		other RNA	-0.919379	0.00158274	---
AT5G13430		Ubiquinol-cytochrome C reductase iron-sulfur subunit	-0.920249	4.76e-06	oxidation-reduction process // oxidation-reduction process
AT1G56510	WRR4	Disease resistance protein (TIR-NBS-LRR class)	-0.920276	0.000123516	defense response // defense response // signal transduction // defense response to fungus, incompatible interaction
AT1G16670		Protein kinase superfamily protein	-0.921596	3.93e-07	#N/A
AT2G33000		ubiquitin-associated (UBA)/TS-N domain-containing protein-related	-0.921785	2.07e-06	biological_process
AT1G65890	AAE12	acyl activating enzyme 12	-0.921824	0.00548643	metabolic process
AT2G44290		Bifunctional inhibitor/lipid-transfer protein/seed storage 2S albumin superfamily protein	-0.921855	0.00412669	lipid transport // lipid transport
AT3G10530		Transducin/WD40 repeat-like superfamily protein	-0.922161	0.000135334	biological_process // pyrimidine ribonucleotide biosynthetic process
AT5G53280	PDV1	plastid division1	-0.922227	0.00144675	chloroplast fission
AT4G08990		DNA (cytosine-5-)-methyltransferase family protein	-0.922278	8.59e-05	DNA methylation // DNA methylation // C-5 methylation of cytosine
AT4G18375		RNA-binding KH domain-containing protein	-0.922953	0.000177114	biological_process
AT1G58300	HO4	heme oxygenase 4	-0.925079	0.00333902	heme oxidation // oxidation-reduction process
AT2G35820		ureidoglycolate hydrolases	-0.927685	7.48e-05	allantoin catabolic process // photoperiodism, flowering
AT5G39100	GLP6	germin-like protein 6	-0.928614	0.00479562	biological_process
AT4G37490	CYCB1;1	CYCLIN B1;1	-0.929168	8.41e-06	regulation of cyclin-dependent protein kinase activity // microtubule cytoskeleton organization // cytokinesis by cell plate formation // regulation of cell growth // DNA replication // double-strand break repair // DNA methylation // mitosis // synapsis // reciprocal meiotic recombination // cell proliferation // response to gamma radiation // response to gamma radiation // stomatal lineage prog…
AT2G21900	WRKY59	WRKY DNA-binding protein 59	-0.929329	0.000323557	regulation of transcription, DNA-dependent // regulation of transcription, DNA-dependent
AT5G51530		Ubiquitin carboxyl-terminal hydrolase-related protein	-0.929532	0.000540165	ubiquitin-dependent protein catabolic process
AT1G05570	GSL6	callose synthase 1	-0.929849	5.31e-05	(1->3)-beta-D-glucan biosynthetic process // (1->3)-beta-D-glucan biosynthetic process // cellular membrane fusion // microsporogenesis // callose deposition in cell wall
AT3G25880		NAD(P)-binding Rossmann-fold superfamily protein	-0.931439	0.00316173	response to auxin stimulus
AT5G26340	STP13	Major facilitator superfamily protein	-0.932912	0.00904814	transport // amino acid import // transmembrane transport
AT5G65500		U-box domain-containing protein kinase family protein	-0.933277	3.05e-05	protein phosphorylation // protein ubiquitination
AT2G38350			-0.9342	0.000107559	biological_process
AT3G28540		P-loop containing nucleoside triphosphate hydrolases superfamily protein	-0.934273	0.00615371	---
AT2G46950	CYP709B2	cytochrome P450, family 709, subfamily B, polypeptide 2	-0.934274	1.1e-06	oxidation-reduction process
AT4G11850	PLDGAMMA1	phospholipase D gamma 1	-0.935582	0.00109992	membrane lipid metabolic process // response to oxidative stress // metabolic process // embryo development ending in seed dormancy // defense response to bacterium, incompatible interaction // response to aluminum ion // phosphatidylcholine metabolic process
AT2G46060		transmembrane protein-related	-0.935833	6.12e-07	biological_process
AT4G31805		WRKY family transcription factor	-0.938137	0.000120957	regulation of transcription, DNA-dependent
AT4G24050		NAD(P)-binding Rossmann-fold superfamily protein	-0.939805	6.6e-05	metabolic process
AT5G46440			-0.939878	0.000309062	biological_process
AT2G26170	MAX1	cytochrome P450, family 711, subfamily A, polypeptide 1	-0.940871	0.00977772	protein targeting to membrane // response to wounding // coumarin biosynthetic process // auxin polar transport // regulation of meristem structural organization // positive regulation of flavonoid biosynthetic process // positive regulation of flavonoid biosynthetic process // secondary shoot formation // regulation of plant-type hypersensitive response // carotenoid biosynthetic process // oxid…
AT5G28320			-0.941172	8.51e-07	biological_process
AT4G01870		tolB protein-related	-0.94199	0.000813468	proteolysis // toxin catabolic process // response to ethylene stimulus // abscisic acid mediated signaling pathway // response to cyclopentenone // methylglyoxal catabolic process to D-lactate // intracellular signal transduction
AT5G45280		Pectinacetylesterase family protein	-0.944527	0.000240036	biological_process // sterol biosynthetic process
AT1G62770		Plant invertase/pectin methylesterase inhibitor superfamily protein	-0.944623	0.00328698	meristem initiation // xylem development
AT1G02360		Chitinase family protein	-0.944992	0.00879628	respiratory burst involved in defense response // carbohydrate metabolic process // amino acid transport // response to nitrate // response to chitin // nitrate transport // cell wall macromolecule catabolic process // defense response to fungus
AT1G12015		snoRNA	-0.946106	0.000136694	#N/A
AT2G40050		Cysteine/Histidine-rich C1 domain family protein	-0.948741	4.31e-05	oxidation-reduction process
AT2G43550		Scorpion toxin-like knottin superfamily protein	-0.948894	0.000565001	defense response
AT1G17744			-0.949672	0.00999436	biological_process
AT2G40960		Single-stranded nucleic acid binding R3H protein	-0.950879	0.000148078	biological_process
AT3G13500			-0.950893	0.000238605	biological_process
AT4G36990	HSFB1	heat shock factor 4	-0.950901	0.000372055	regulation of transcription, DNA-dependent // ER-nucleus signaling pathway // toxin catabolic process // response to heat // response to water deprivation // response to abscisic acid stimulus // response to cyclopentenone // endoplasmic reticulum unfolded protein response // response to endoplasmic reticulum stress // hyperosmotic salinity response // negative regulation of transcription, DNA-de…
AT3G49780	PSK4	phytosulfokine 4 precursor	-0.951065	0.000138524	cell proliferation // cell proliferation // organ morphogenesis // cell differentiation
AT1G71050	HIPP20	Heavy metal transport/detoxification superfamily protein	-0.951535	2.71e-06	metal ion transport
AT1G13710	KLU	cytochrome P450, family 78, subfamily A, polypeptide 5	-0.9555	0.00020583	positive regulation of cell proliferation // regulation of meristem growth // leaf formation // organ growth // regulation of growth rate // positive regulation of organ growth // floral organ development // oxidation-reduction process
AT1G67800		Copine (Calcium-dependent phospholipid-binding protein) family	-0.957124	0.000524775	N-terminal protein myristoylation // salicylic acid biosynthetic process // salicylic acid mediated signaling pathway // negative regulation of defense response // innate immune response
AT4G23130	RLK6	cysteine-rich RLK (RECEPTOR-like protein kinase) 5	-0.957681	3.3e-05	protein phosphorylation // response to salicylic acid stimulus // programmed cell death // defense response to bacterium
AT1G65483			-0.958563	0.000204422	---
AT3G57710		Protein kinase superfamily protein	-0.958635	1.52e-05	protein phosphorylation
AT1G56418			-0.959108	0.00656489	biological_process
AT1G73810		Core-2/I-branching beta-1,6-N-acetylglucosaminyltransferase family protein	-0.959214	0.00486499	---
AT1G11270		F-box and associated interaction domains-containing protein	-0.959239	1.52e-05	heat acclimation
AT1G78190		Trm112p-like protein	-0.959731	7.1e-05	biological_process
AT1G52100		Mannose-binding lectin superfamily protein	-0.960538	0.00290945	biological_process
AT4G22214		Defensin-like (DEFL) family protein	-0.960727	0.00025697	biological_process
AT5G18730			-0.961244	3.47e-06	biological_process
AT5G16350		O-acyltransferase (WSD1-like) family protein	-0.962112	8.88e-05	---
AT2G24680		transcriptional factor B3 family protein	-0.962191	8.46e-06	regulation of transcription, DNA-dependent // regulation of transcription, DNA-dependent
AT4G23160	CRK8	cysteine-rich RLK (RECEPTOR-like protein kinase) 8	-0.962467	0.000116477	protein phosphorylation
AT2G20720		Pentatricopeptide repeat (PPR) superfamily protein	-0.962744	0.0043345	biological_process // transcription factor import into nucleus
AT4G08740			-0.962783	1.52e-06	biological_process
AT3G02840		ARM repeat superfamily protein	-0.967528	0.0028519	protein targeting to membrane // cellular membrane fusion // ethylene biosynthetic process // response to ozone // response to chitin // regulation of plant-type hypersensitive response // endoplasmic reticulum unfolded protein response // negative regulation of programmed cell death // defense response to fungus // response to other organism // defense response by callose deposition
AT5G37340		ZPR1 zinc-finger domain protein	-0.968846	5.22e-06	biological_process
AT3G20440	EMB2729	Alpha amylase family protein	-0.969364	0.00013884	carbohydrate metabolic process // carbohydrate metabolic process // carbohydrate metabolic process // post-embryonic development // embryo development ending in seed dormancy
AT3G21770		Peroxidase superfamily protein	-0.969898	0.000195887	response to oxidative stress // oxidation-reduction process
AT5G43020		Leucine-rich repeat protein kinase family protein	-0.970475	3.24e-06	cytokinesis by cell plate formation // protein phosphorylation // protein phosphorylation // transmembrane receptor protein tyrosine kinase signaling pathway // anaphase
AT3G19660			-0.970727	0.000277769	biological_process
AT1G13520		Protein of unknown function (DUF1262)	-0.971299	8.2e-05	---
AT5G56300	GAMT2	gibberellic acid methyltransferase 2	-0.97355	2.44e-05	---
AT4G26270	PFK3	phosphofructokinase 3	-0.973959	0.00113429	glycolysis // glycolysis // glycolysis
AT4G04601			-0.974526	6.31e-05	biological_process
AT2G18120	SRS4	SHI-related sequence 4	-0.978889	0.00246598	biological_process
AT2G04040	TX1	MATE efflux family protein	-0.979849	0.00655974	drug transmembrane transport // cadmium ion transport // sequestering of metal ion // transmembrane transport
AT3G43800	GSTU27	glutathione S-transferase tau 27	-0.980672	1.72e-08	glutathione metabolic process // toxin catabolic process // toxin catabolic process // response to cyclopentenone // response to karrikin
AT3G50470	MLA10	homolog of RPW8 3	-0.981053	0.00410869	response to other organism
AT1G63245	CLE14	CLAVATA3/ESR-RELATED 14	-0.981285	0.000219447	signal transduction
AT1G15790			-0.982132	0.000134444	---
AT4G34610	BLH6	BEL1-like homeodomain 6	-0.982642	8.3e-06	regulation of transcription, DNA-dependent // organ development
AT4G01360			-0.983051	0.000372853	embryo development
AT1G53000	KDSB	Nucleotide-diphospho-sugar transferases superfamily protein	-0.9836	2.42e-08	lipopolysaccharide biosynthetic process // lipopolysaccharide biosynthetic process // pollen development // pollen tube growth // methylglyoxal catabolic process to D-lactate // CMP-keto-3-deoxy-D-manno-octulosonic acid biosynthetic process
AT5G47220	ERF2	ethylene responsive element binding factor 2	-0.984224	0.00434078	respiratory burst involved in defense response // regulation of transcription, DNA-dependent // regulation of transcription, DNA-dependent // ethylene biosynthetic process // response to ethylene stimulus // response to abscisic acid stimulus // induced systemic resistance, jasmonic acid mediated signaling pathway // ethylene mediated signaling pathway // ethylene mediated signaling pathway // re…
AT5G48400	GLR1.2	Glutamate receptor family protein	-0.984425	0.000241751	transport // amino acid transport // cellular calcium ion homeostasis // response to light stimulus // cellular response to phosphate starvation // galactolipid biosynthetic process // cellular cation homeostasis // cellular response to water deprivation
AT5G16360		NC domain-containing protein-related	-0.984534	3.21e-06	biological_process
AT1G22550		Major facilitator superfamily protein	-0.984738	0.000190241	oligopeptide transport // oligopeptide transport
AT1G05630	AT5PTASE13	Endonuclease/exonuclease/phosphatase family protein	-0.984936	8.19e-07	#N/A
AT5G06390	FLA17	FASCICLIN-like arabinogalactan protein 17 precursor	-0.98559	5.32e-06	cell adhesion
AT4G35480	RHA3B	RING-H2 finger A3B	-0.987047	0.000272897	ethylene biosynthetic process // response to chitin // heat acclimation // proline transport
AT3G58020		Chaperone DnaJ-domain superfamily protein	-0.98726	1.8e-05	protein folding
AT4G15400		HXXXD-type acyl-transferase family protein	-0.987825	0.00258291	transition metal ion transport // iron ion transport // cellular response to iron ion starvation // response to nitrate // nitrate transport // brassinosteroid metabolic process
AT2G46430	CNGC3.C	cyclic nucleotide gated channel 3	-0.988145	1.91e-05	ion transport // transmembrane transport
AT2G25000	WRKY60	WRKY DNA-binding protein 60	-0.988185	0.000369048	MAPK cascade // response to molecule of bacterial origin // regulation of response to biotic stimulus // regulation of transcription, DNA-dependent // regulation of transcription, DNA-dependent // protein targeting to membrane // detection of biotic stimulus // salicylic acid biosynthetic process // response to salicylic acid stimulus // systemic acquired resistance, salicylic acid mediated signa…
AT4G21950			-0.988473	0.000968245	biological_process
AT4G33270	CDC20.1	Transducin family protein / WD-40 repeat family protein	-0.989052	9.04e-07	signal transduction
AT5G50790	SWEET10	Nodulin MtN3 family protein	-0.990064	0.00442034	sucrose transport
AT3G01970	WRKY45	WRKY DNA-binding protein 45	-0.991225	0.00341484	regulation of transcription, DNA-dependent // regulation of transcription, DNA-dependent
AT1G59865			-0.991244	0.000301282	biological_process
AT1G31290	AGO3	ARGONAUTE 3	-0.991578	0.000205264	#N/A
AT4G20110	VSR7	VACUOLAR SORTING RECEPTOR 7	-0.99182	1.8e-05	protein targeting to vacuole // protein targeting to vacuole // intracellular protein transport // response to nitrate // nitrate transport
AT5G13490	AAC2	ADP/ATP carrier 2	-0.99329	0.00047752	gluconeogenesis // protein targeting to membrane // transport // transport // anion transport // nucleotide transport // amino acid transport // ER to Golgi vesicle-mediated transport // cellular membrane fusion // cytoskeleton organization // regulation of plant-type hypersensitive response // proteasomal protein catabolic process // ammonium transport // basic amino acid transport // purine nuc…
AT3G16510		Calcium-dependent lipid-binding (CaLB domain) family protein	-0.993732	5.64e-06	biological_process
AT1G09995		DNA repair DEAD helicase RAD3/XP-D subfamily protein	-0.99391	2.2e-08	biological_process
AT5G25930		Protein kinase family protein with leucine-rich repeat domain	-0.995124	0.000790205	respiratory burst involved in defense response // protein phosphorylation // protein targeting to membrane // cellular membrane fusion // response to ethylene stimulus // abscisic acid mediated signaling pathway // response to chitin // regulation of plant-type hypersensitive response // intracellular signal transduction // negative regulation of programmed cell death // defense response by callo…
AT3G62160		HXXXD-type acyl-transferase family protein	-0.995397	4.74e-05	---
AT5G49290	RLP56	receptor like protein 56	-0.996336	2.76e-06	signal transduction
AT5G65070	MAF4	K-box region and MADS-box transcription factor family protein	-0.996502	8.26e-07	regulation of transcription, DNA-dependent // negative regulation of flower development // vernalization response // ovule development
AT4G04840	MSRB6	methionine sulfoxide reductase B6	-0.997505	0.00821091	oxidation-reduction process
AT1G55265		Protein of unknown function, DUF538	-0.999555	0.000419142	biological_process
AT1G79890		RAD3-like DNA-binding helicase protein	-1.00087	0.000198144	nucleobase-containing compound metabolic process // DNA metabolic process // DNA-dependent DNA replication // DNA recombination // chromosome segregation // meiosis // synapsis // reciprocal meiotic recombination // response to gamma radiation // regulation of telomere maintenance // regulation of chromosome organization // meiotic DNA double-strand break formation // telomere maintenance in resp…
AT4G06598			-1.00148	3.8e-06	biological_process
AT1G20380		Prolyl oligopeptidase family protein	-1.0021	1.17e-06	#N/A
AT1G69920	GSTU12	glutathione S-transferase TAU 12	-1.00218	1.64e-05	glutathione metabolic process // toxin catabolic process
AT3G52430	PAD4	alpha/beta-Hydrolases superfamily protein	-1.0023	0.000816672	MAPK cascade // response to hypoxia // response to hypoxia // defense response to insect // defense response to insect // respiratory burst involved in defense response // regulation of response to biotic stimulus // regulation of transcription, DNA-dependent // protein targeting to membrane // lipid metabolic process // lipid metabolic process // cellular membrane fusion // cell communication //…
AT4G40020		Myosin heavy chain-related protein	-1.00307	1.14e-05	biological_process
AT5G45520		Leucine-rich repeat (LRR) family protein	-1.00318	2e-05	biological_process
AT1G64610		Transducin/WD40 repeat-like superfamily protein	-1.00365	1.13e-06	MAPK cascade // response to superoxide // protein targeting to membrane // cell communication // signal transduction // signal transduction // cell death // response to cold // response to external stimulus // systemic acquired resistance // salicylic acid biosynthetic process // response to ethylene stimulus // abscisic acid mediated signaling pathway // hormone-mediated signaling pathway // sys…
AT2G07170		ARM repeat superfamily protein	-1.00414	7.24e-05	cytokinesis // DNA-dependent DNA replication initiation // regulation of DNA replication // methylation-dependent chromatin silencing // intracellular protein transport // microtubule-based process // cell proliferation // regulation of flower development // vesicle-mediated transport // gene silencing // chromatin silencing by small RNA // histone lysine methylation // histone H3-K9 methylation …
AT2G31990		Exostosin family protein	-1.00485	8.43e-06	biological_process
AT1G69710		Regulator of chromosome condensation (RCC1) family with FYVE zinc finger domain	-1.00622	0.00134928	---
AT1G05370		Sec14p-like phosphatidylinositol transfer family protein	-1.00714	5.16e-05	biological_process
AT1G01670		RING/U-box superfamily protein	-1.00754	9.74e-07	protein ubiquitination
AT1G34420		leucine-rich repeat transmembrane protein kinase family protein	-1.00851	2.24e-05	protein phosphorylation // N-terminal protein myristoylation // systemic acquired resistance // salicylic acid biosynthetic process // salicylic acid mediated signaling pathway // negative regulation of defense response // innate immune response
AT5G45240		Disease resistance protein (TIR-NBS-LRR class)	-1.00927	1.38e-05	defense response // defense response // signal transduction
AT1G59590	ZCF37	ZCF37	-1.01105	0.00173303	---
AT5G63730	ATARI14	IBR domain-containing protein	-1.0138	3.23e-05	regulation of double fertilization forming a zygote and endosperm
AT4G23240	CRK16	cysteine-rich RLK (RECEPTOR-like protein kinase) 16	-1.01401	0.000350505	protein phosphorylation // protein phosphorylation
AT2G20453			-1.01412	0.000292304	---
AT1G70950		TPX2 (targeting protein for Xklp2) protein family	-1.01442	0.00191806	biological_process
AT5G05460	ENGase85A	Glycosyl hydrolase family 85	-1.01517	0.00033891	N-glycan processing
AT1G17600		Disease resistance protein (TIR-NBS-LRR class) family	-1.01554	8.76e-06	defense response // defense response // signal transduction // systemic acquired resistance // salicylic acid biosynthetic process // salicylic acid mediated signaling pathway // negative regulation of defense response // innate immune response
AT3G20960	CYP705A33	cytochrome P450, family 705, subfamily A, polypeptide 33	-1.0166	0.000119623	oxidation-reduction process
AT1G56240	PP2-B13	phloem protein 2-B13	-1.01682	0.00468531	---
AT3G23880		F-box and associated interaction domains-containing protein	-1.01701	0.00499681	biological_process
AT1G72120		Major facilitator superfamily protein	-1.01758	0.000280331	oligopeptide transport // oligopeptide transport
AT3G05690	UNE8	nuclear factor Y, subunit A2	-1.01827	7.47e-05	regulation of transcription, DNA-dependent // regulation of transcription, DNA-dependent // double fertilization forming a zygote and endosperm
AT3G13437			-1.02041	0.000279242	biological_process
AT3G57200			-1.02144	2.38e-05	biological_process
AT4G01750	RGXT2	rhamnogalacturonan xylosyltransferase 2	-1.02169	0.0081245	rhamnogalacturonan II biosynthetic process
AT4G26060		Ribosomal protein L18ae family	-1.02174	7.71e-08	translation // biological_process
AT4G13572			-1.02221	1.62e-05	biological_process
AT3G05830			-1.02418	6.26e-05	biological_process
AT5G11210	GLR2.5	glutamate receptor 2.5	-1.02507	9.79e-05	transport // amino acid transport // cellular calcium ion homeostasis // G-protein coupled receptor signaling pathway // response to light stimulus // cellular cation homeostasis
AT2G04420		Polynucleotidyl transferase, ribonuclease H-like superfamily protein	-1.02525	0.000291734	---
AT4G26990			-1.02548	5.12e-08	biological_process
AT1G11800		endonuclease/exonuclease/phosphatase family protein	-1.02587	2.55e-07	---
AT4G34400		AP2/B3-like transcriptional factor family protein	-1.02727	0.000246552	regulation of transcription, DNA-dependent // regulation of transcription, DNA-dependent
AT5G40780	LHT1	lysine histidine transporter 1	-1.02742	0.000507653	N-terminal protein myristoylation // protein targeting to membrane // anion transport // nucleotide transport // amino acid transport // amino acid transport // ER to Golgi vesicle-mediated transport // cellular membrane fusion // regulation of plant-type hypersensitive response // ammonium transport // basic amino acid transport // endoplasmic reticulum unfolded protein response // negative regu…
AT1G79530	GAPCP-1	glyceraldehyde-3-phosphate dehydrogenase of plastid 1	-1.03137	0.00046185	carbohydrate metabolic process // glucose metabolic process // glycolysis // pollen development // tapetal layer development // oxidation-reduction process // primary root development // amino acid homeostasis
AT1G18910		zinc ion binding;zinc ion binding	-1.03266	2.79e-05	---
AT1G69485		Ribosomal L32p protein family	-1.03328	0.000116398	translation
AT3G43790	ZIFL2	zinc induced facilitator-like 2	-1.03329	0.000180642	response to nematode // transmembrane transport
AT1G30420	MRP12	multidrug resistance-associated protein 12	-1.03373	0.00175855	#N/A
AT4G33390		Plant protein of unknown function (DUF827)	-1.03382	1.36e-06	biological_process // plant-type cell wall modification // pollen tube growth
AT1G61415			-1.03392	0.00181128	biological_process
AT2G46270	GBF3	G-box binding factor 3	-1.03393	0.00409653	response to superoxide // transcription, DNA-dependent // regulation of transcription, DNA-dependent // signal transduction // response to xenobiotic stimulus // response to water deprivation // response to wounding // response to salt stress // response to ethylene stimulus // response to auxin stimulus // response to abscisic acid stimulus // response to abscisic acid stimulus // abscisic acid …
AT5G37740		Calcium-dependent lipid-binding (CaLB domain) family protein	-1.03664	0.000994359	biological_process
AT1G12340		Cornichon family protein	-1.03913	0.00136979	#N/A
AT3G28155			-1.03918	5.39e-05	biological_process
AT1G03710		Cystatin/monellin superfamily protein	-1.0424	0.000117705	#N/A
AT5G15220		Ribosomal protein L27 family protein	-1.04297	5.19e-06	translation // translation
AT3G52400	SYP122	syntaxin of plants 122	-1.04405	0.00372872	MAPK cascade // respiratory burst involved in defense response // regulation of response to biotic stimulus // regulation of transcription, DNA-dependent // protein targeting to membrane // protein targeting to membrane // anion transport // nucleotide transport // intracellular protein transport // intracellular protein transport // intracellular protein transport // ER to Golgi vesicle-mediated…
AT3G18550	TCP18	TCP family transcription factor	-1.04439	0.000242115	regulation of transcription, DNA-dependent // regulation of secondary shoot formation
AT3G01720			-1.04464	8.32e-07	calcium ion transport // Golgi organization // biological_process // response to salt stress // response to sucrose stimulus // response to glucose stimulus // response to fructose stimulus
AT2G21550		Bifunctional dihydrofolate reductase/thymidylate synthase	-1.04603	6.13e-05	transition metal ion transport // dTMP biosynthetic process // glycine biosynthetic process // one-carbon metabolic process // nucleotide biosynthetic process // DNA endoreduplication // oxidation-reduction process
AT4G34750		SAUR-like auxin-responsive protein family	-1.04708	0.00111487	response to auxin stimulus
AT1G53920	GLIP5	GDSL-motif lipase 5	-1.04815	0.000129417	lipid metabolic process // amino acid transport // proline transport
AT3G19210	RAD54	homolog of RAD54	-1.04914	0.000235008	double-strand break repair via homologous recombination // double-strand break repair via homologous recombination // DNA repair // double-strand break repair // DNA recombination // regulation of transcription, DNA-dependent // meiosis // synapsis // reciprocal meiotic recombination // male meiosis // response to ionizing radiation // vegetative to reproductive phase transition of meristem // re…
AT2G18938			-1.05023	0.000147946	biological_process
AT1G26380		FAD-binding Berberine family protein	-1.05136	0.00546545	response to ethylene stimulus // oxidation-reduction process // cellular response to hypoxia
AT5G13330	Rap2.6L	related to AP2 6l	-1.05246	0.000150123	regulation of transcription, DNA-dependent // regulation of transcription, DNA-dependent // toxin catabolic process // response to water deprivation // response to salt stress // response to ethylene stimulus // response to abscisic acid stimulus // response to salicylic acid stimulus // response to jasmonic acid stimulus // organ senescence // response to cyclopentenone // positive regulation of…
AT4G05475		RNI-like superfamily protein	-1.0525	4.64e-05	---
AT5G43910		pfkB-like carbohydrate kinase family protein	-1.05403	0.00149023	D-ribose metabolic process // systemic acquired resistance // salicylic acid biosynthetic process
AT1G72420		NADH:ubiquinone oxidoreductase intermediate-associated protein 30	-1.0545	4.84e-05	biological_process
AT1G03990		Long-chain fatty alcohol dehydrogenase family protein	-1.055	0.000760056	#N/A
AT1G69120	AP1	K-box region and MADS-box transcription factor family protein	-1.05581	0.0052878	regulation of transcription, DNA-dependent // cellular membrane fusion // microsporogenesis // plant-type cell wall modification // pollen tube growth // post-embryonic morphogenesis // flower development // regulation of flower development // meristem structural organization // maintenance of floral meristem identity // specification of floral organ identity // floral meristem determinacy // pos…
AT2G36295			-1.05653	2.03e-05	biological_process
AT5G22590		Leucine Rich Repeat protein family	-1.05719	0.000200497	biological_process
AT1G14080	FUT6	fucosyltransferase 6	-1.0578	1.65e-05	#N/A
AT1G01210		DNA-directed RNA polymerase, subunit M, archaeal	-1.05867	1.54e-07	#N/A
AT1G67330		Protein of unknown function (DUF579)	-1.05905	0.0045253	biological_process // response to nitrate // nitrate transport
AT4G18630		Protein of unknown function (DUF688)	-1.05977	0.0036088	biological_process
AT2G15220		Plant basic secretory protein (BSP) family protein	-1.06127	0.00146265	defense response
AT5G54490	PBP1	pinoid-binding protein 1	-1.06229	0.000151096	signal transduction // response to water deprivation // ethylene biosynthetic process // response to ethylene stimulus // response to auxin stimulus // response to auxin stimulus // response to abscisic acid stimulus // abscisic acid mediated signaling pathway // response to jasmonic acid stimulus // response to cyclopentenone // hyperosmotic salinity response
AT4G39830		Cupredoxin superfamily protein	-1.06259	0.00429585	systemic acquired resistance // salicylic acid biosynthetic process // sterol biosynthetic process // sphingoid biosynthetic process // oxidation-reduction process
AT5G48657		defense protein-related	-1.06349	0.000780529	biological_process
AT5G57510			-1.06395	0.00273359	response to chitin // cellular response to hypoxia
AT1G22340	UGT85A7	UDP-glucosyl transferase 85A7	-1.0655	0.0010674	metabolic process
AT2G37750			-1.06631	0.00082005	biological_process
AT1G50400		Eukaryotic porin family protein	-1.06641	9.5e-05	DNA metabolic process // anion transport // anion transport // meiosis // regulation of chromosome organization // regulation of anion transport // transmembrane transport
AT3G11402		Cysteine/Histidine-rich C1 domain family protein	-1.06797	0.00130591	biological_process // oxidation-reduction process
AT5G55380		MBOAT (membrane bound O-acyl transferase) family protein	-1.06825	0.00133398	biological_process
AT5G41160	PUP12	purine permease 12	-1.0687	2.24e-05	purine base transport
AT3G60540		Preprotein translocase Sec, Sec61-beta subunit protein	-1.07123	0.0002936	systemic acquired resistance // protein transport // response to endoplasmic reticulum stress
AT2G04100		MATE efflux family protein	-1.07202	0.00780909	drug transmembrane transport // transmembrane transport
AT2G04090		MATE efflux family protein	-1.07211	0.000361123	drug transmembrane transport // transmembrane transport
AT5G17320	HDG9	homeodomain GLABROUS 9	-1.07384	3.69e-06	regulation of transcription, DNA-dependent // regulation of transcription, DNA-dependent
AT4G34930		PLC-like phosphodiesterases superfamily protein	-1.07533	5.91e-06	lipid metabolic process // intracellular signal transduction
AT3G51430	YLS2	Calcium-dependent phosphotriesterase superfamily protein	-1.07607	0.000133998	biosynthetic process // alkaloid biosynthetic process
AT4G33970		Leucine-rich repeat (LRR) family protein	-1.07737	0.000891399	---
AT2G16530		3-oxo-5-alpha-steroid 4-dehydrogenase family protein	-1.0774	0.00014484	lipid metabolic process
AT2G41835		zinc finger (C2H2 type, AN1-like) family protein	-1.07791	3.02e-06	biological_process
AT5G56730		Insulinase (Peptidase family M16) protein	-1.07954	1.7e-07	proteolysis // proteolysis
AT3G21520	DMP1	DUF679 domain membrane protein 1	-1.08286	0.00117609	endomembrane system organization
AT5G07770		Actin-binding FH2 protein	-1.08364	8.39e-06	actin filament organization // cellular component organization // actin cytoskeleton organization
AT1G02440	ATARFD1A	ADP-ribosylation factor D1A	-1.08601	0.000321792	intracellular protein transport // small GTPase mediated signal transduction
AT4G10890			-1.08663	1.91e-08	biological_process
AT3G60580		C2H2-like zinc finger protein	-1.08673	3.17e-05	regulation of transcription, DNA-dependent
AT1G06620		2-oxoglutarate (2OG) and Fe(II)-dependent oxygenase superfamily protein	-1.08717	0.000169018	#N/A
AT4G34580	SRH1	Sec14p-like phosphatidylinositol transfer family protein	-1.08733	3.52e-07	transport // transport // cell tip growth // root epidermal cell differentiation // trichoblast differentiation // lateral root development // developmental growth // root hair cell differentiation // root hair elongation // root hair cell tip growth
AT1G53542			-1.08776	0.000565786	biological_process
AT1G03950	VPS2.3	vacuolar protein sorting-associated protein 2.3	-1.0882	5.17e-07	protein transport // vesicle-mediated transport
AT5G39750	EMB3008	AGAMOUS-like 81	-1.08829	9.22e-05	regulation of transcription, DNA-dependent // embryo development ending in seed dormancy
AT5G51480	SKS2	SKU5 similar 2	-1.08864	0.000592416	oxidation-reduction process
AT4G09880			-1.08956	2.55e-05	biological_process
AT1G74430	MYB95	myb domain protein 95	-1.08974	0.00137513	regulation of transcription, DNA-dependent // jasmonic acid metabolic process // response to salicylic acid stimulus // response to jasmonic acid stimulus // response to jasmonic acid stimulus
AT4G37900		Protein of unknown function (duplicated DUF1399)	-1.09038	5.66e-05	amino acid transport // biological_process
AT4G10410		Leucine-rich repeat (LRR) family protein	-1.0909	0.000142223	biological_process
AT5G02670			-1.09159	6.73e-05	biological_process
AT2G39210		Major facilitator superfamily protein	-1.09312	0.000303829	amino acid transport // ER to Golgi vesicle-mediated transport // systemic acquired resistance // response to endoplasmic reticulum stress // amino acid import // defense response to fungus // transmembrane transport
AT1G47560	SEC3B	exocyst complex component sec3B	-1.0934	0.000205209	biological_process
AT3G13782	NFA4	nucleosome assembly protein1;4	-1.09359	5.53e-05	nucleotide-excision repair // nucleosome assembly // nucleosome assembly // response to cadmium ion
AT5G19880		Peroxidase superfamily protein	-1.09501	0.00146044	response to oxidative stress // response to virus // response to ethylene stimulus // oxidation-reduction process
AT5G01870		Bifunctional inhibitor/lipid-transfer protein/seed storage 2S albumin superfamily protein	-1.09744	0.00875722	lipid transport // lipid transport
AT5G60800		Heavy metal transport/detoxification superfamily protein	-1.09798	9.67e-06	metal ion transport
AT5G23930		Mitochondrial transcription termination factor family protein	-1.09802	1.88e-06	biological_process
AT2G25964			-1.09919	2.76e-08	biological_process
AT2G28755		UDP-D-glucuronate carboxy-lyase-related	-1.09958	0.00238796	biological_process
AT5G52760		Copper transport protein family	-1.09973	0.000247703	MAPK cascade // response to molecule of bacterial origin // regulation of response to biotic stimulus // regulation of transcription, DNA-dependent // protein targeting to membrane // detection of external stimulus // detection of biotic stimulus // response to bacterium // systemic acquired resistance // salicylic acid biosynthetic process // defense response, incompatible interaction // systemi…
AT4G17180		O-Glycosyl hydrolases family 17 protein	-1.10044	2.14e-06	carbohydrate metabolic process
AT5G16170		Core-2/I-branching beta-1,6-N-acetylglucosaminyltransferase family protein	-1.10062	0.00286638	---
AT2G28160	FRU	FER-like regulator of iron uptake	-1.10081	0.000682915	transition metal ion transport // regulation of transcription, DNA-dependent // response to iron ion // regulation of iron ion transport // cellular response to iron ion // cellular response to ethylene stimulus // cellular response to nitric oxide
AT3G47040		Glycosyl hydrolase family protein	-1.10111	0.00164844	carbohydrate metabolic process // carbohydrate metabolic process // iron ion transport // cellular response to iron ion starvation // response to nitrate // nitrate transport
AT4G04223		other RNA	-1.10463	2.64e-07	---
AT1G51890		Leucine-rich repeat protein kinase family protein	-1.10487	0.00696105	protein phosphorylation // protein targeting to membrane // salicylic acid mediated signaling pathway // regulation of plant-type hypersensitive response // defense response to bacterium // negative regulation of programmed cell death // defense response to fungus
AT4G28460			-1.10508	0.00646574	biological_process
AT2G24300		Calmodulin-binding protein	-1.10528	3.32e-05	biological_process
AT2G20142		Toll-Interleukin-Resistance (TIR) domain family protein	-1.10566	0.00161113	signal transduction
AT4G21850	MSRB9	methionine sulfoxide reductase B9	-1.10593	0.00058689	oxidation-reduction process
AT4G34380		Transducin/WD40 repeat-like superfamily protein	-1.10682	2.09e-06	biological_process
AT1G09480		NAD(P)-binding Rossmann-fold superfamily protein	-1.11067	1.77e-05	#N/A
AT5G36220	CYP91A1	cytochrome p450 81d1	-1.11132	4.07e-08	oxidation-reduction process
AT1G07780	TRP6	phosphoribosylanthranilate isomerase 1	-1.11285	4.99e-06	tryptophan biosynthetic process // tryptophan biosynthetic process // tryptophan metabolic process // metabolic process
AT4G15165		N-terminal nucleophile aminohydrolases (Ntn hydrolases) superfamily protein	-1.11431	0.000419908	ubiquitin-dependent protein catabolic process // proteolysis involved in cellular protein catabolic process
AT3G04060	NAC046	NAC domain containing protein 46	-1.11718	0.00220849	regulation of transcription, DNA-dependent // multicellular organismal development // heat acclimation
AT3G29970		B12D protein	-1.12055	4.71e-05	biological_process
AT5G64000	SAL2	Inositol monophosphatase family protein	-1.12061	0.000130608	sulfur compound metabolic process // sulfur compound metabolic process // systemic acquired resistance // response to endoplasmic reticulum stress // phosphatidylinositol phosphorylation
AT3G30769			-1.12121	0.000638509	biological_process
AT3G15590		Tetratricopeptide repeat (TPR)-like superfamily protein	-1.12213	2.56e-06	---
AT3G28500		60S acidic ribosomal protein family	-1.12283	5.81e-06	translational elongation // translational elongation
AT2G40095		Alpha/beta hydrolase related protein	-1.12396	0.000304013	biological_process
AT4G37700			-1.12428	0.00679948	biological_process
AT1G16420	MCP2e	metacaspase 8	-1.12456	7.05e-05	proteolysis // response to oxidative stress // response to oxidative stress // response to UV-C // hydrogen peroxide-mediated programmed cell death // programmed cell death // response to hydrogen peroxide
AT5G45000		Disease resistance protein (TIR-NBS-LRR class) family	-1.12472	0.000436205	defense response // signal transduction
AT1G24390			-1.12551	2.08e-05	#N/A
AT1G11070			-1.12713	0.000182749	---
AT5G22555			-1.12743	7.82e-06	biological_process
AT3G47300	SELT	SELT-like protein precursor	-1.1277	1.32e-06	cell redox homeostasis
AT3G14610	CYP72A7	cytochrome P450, family 72, subfamily A, polypeptide 7	-1.12793	2.05e-06	oxidation-reduction process
AT3G56890		F-box associated ubiquitination effector family protein	-1.13104	0.000464994	biological_process
AT5G28310		NAD(P)-binding Rossmann-fold superfamily protein	-1.13106	1.08e-05	oxidation-reduction process
AT5G15860	PCME	prenylcysteine methylesterase	-1.13161	0.000688051	metabolic process // fatty acid catabolic process
AT3G18200		nodulin MtN21 /EamA-like transporter family protein	-1.13349	0.000144598	---
AT5G08460		GDSL-like Lipase/Acylhydrolase superfamily protein	-1.13353	1.25e-06	lipid metabolic process // positive regulation of transcription, DNA-dependent
AT5G11180	GLR2.6	glutamate receptor 2.6	-1.13666	0.000353754	transport // cellular calcium ion homeostasis // response to light stimulus // cellular cation homeostasis
AT1G59860		HSP20-like chaperones superfamily protein	-1.13801	0.00273133	protein folding // response to osmotic stress // response to heat // response to heat // response to salt stress // protein oligomerization
AT1G74590	GSTU10	glutathione S-transferase TAU 10	-1.13877	8.28e-07	toxin catabolic process // toxin catabolic process // response to cyclopentenone
AT4G15330	CYP705A1	cytochrome P450, family 705, subfamily A, polypeptide 1	-1.13879	1.15e-07	glucuronoxylan metabolic process // xylan biosynthetic process // oxidation-reduction process
AT5G66620	DAR6	DA1-related protein 6	-1.139	2.56e-06	---
AT5G01850		Protein kinase superfamily protein	-1.13976	0.000236178	protein phosphorylation
AT2G17036		F-box family protein with a domain of unknown function (DUF295)	-1.14225	0.00026624	biological_process
AT5G52730		Copper transport protein family	-1.14364	1.15e-05	---
AT5G58940	CRCK1	calmodulin-binding receptor-like cytoplasmic kinase 1	-1.14368	1.28e-06	protein phosphorylation // systemic acquired resistance // salicylic acid biosynthetic process
AT1G13750		Purple acid phosphatases superfamily protein	-1.14466	1.78e-05	tryptophan catabolic process // systemic acquired resistance // indoleacetic acid biosynthetic process // regulation of defense response
AT2G20150			-1.14496	4.79e-05	biological_process // carpel morphogenesis
AT5G27010		ARM repeat superfamily protein	-1.14714	4.62e-05	---
AT5G66640	DAR3	DA1-related protein 3	-1.14803	0.000367222	biological_process
AT4G04490	CRK36	cysteine-rich RLK (RECEPTOR-like protein kinase) 36	-1.1481	0.00403604	MAPK cascade // protein phosphorylation // N-terminal protein myristoylation // protein targeting to membrane // cell communication // response to cold // response to external stimulus // systemic acquired resistance // salicylic acid biosynthetic process // abscisic acid mediated signaling pathway // systemic acquired resistance, salicylic acid mediated signaling pathway // salicylic acid mediat…
AT1G33030		O-methyltransferase family protein	-1.14815	4.06e-05	lignin biosynthetic process
AT3G09020		alpha 1,4-glycosyltransferase family protein	-1.15065	0.000213778	MAPK cascade // respiratory burst involved in defense response // regulation of response to biotic stimulus // protein targeting to membrane // detection of biotic stimulus // salicylic acid biosynthetic process // systemic acquired resistance, salicylic acid mediated signaling pathway // jasmonic acid mediated signaling pathway // response to chitin // regulation of hydrogen peroxide metabolic p…
AT3G23637	DVL21	DVL family protein	-1.15084	0.00383026	shoot development
AT3G52630		Nucleic acid-binding, OB-fold-like protein	-1.15166	2.39e-05	biological_process
AT3G17680		Kinase interacting (KIP1-like) family protein	-1.15232	1.06e-05	biological_process // histone phosphorylation
AT2G34500	CYP710A1	cytochrome P450, family 710, subfamily A, polypeptide 1	-1.15444	2.7e-06	toxin catabolic process // response to cyclopentenone // cellular response to phosphate starvation // sterol biosynthetic process // galactolipid biosynthetic process // pentacyclic triterpenoid biosynthetic process // cellular response to water deprivation // oxidation-reduction process
AT4G22305		alpha/beta-Hydrolases superfamily protein	-1.15496	0.000103686	---
AT5G53870	ENODL1	early nodulin-like protein 1	-1.15602	0.000229489	---
AT1G17480	IQD7	IQ-domain 7	-1.1621	0.00274783	biological_process
AT4G27260	WES1	Auxin-responsive GH3 family protein	-1.16396	0.00665625	response to auxin stimulus // response to auxin stimulus // response to auxin stimulus // auxin homeostasis // response to cyclopentenone
AT2G29720	CTF2B	FAD/NAD(P)-binding oxidoreductase family protein	-1.16488	0.00574023	metabolic process
AT2G32680	RLP23	receptor like protein 23	-1.16555	0.000158499	MAPK cascade // regulation of transcription, DNA-dependent // protein targeting to membrane // defense response // signal transduction // response to bacterium // systemic acquired resistance // systemic acquired resistance, salicylic acid mediated signaling pathway // jasmonic acid mediated signaling pathway // regulation of hydrogen peroxide metabolic process // regulation of plant-type hyperse…
AT2G31865	PARG2	poly(ADP-ribose) glycohydrolase 2	-1.1658	3.91e-06	carbohydrate metabolic process // defense response to fungus
AT2G47130	SDR3	NAD(P)-binding Rossmann-fold superfamily protein	-1.16647	0.000122558	metabolic process // abscisic acid biosynthetic process // defense response to bacterium
AT4G24580	REN1	Rho GTPase activation protein (RhoGAP) with PH domain	-1.16764	1.98e-06	signal transduction // signal transduction // plant-type cell wall modification // pollen germination // pollen tube growth // pollen tube adhesion // activation of Rho GTPase activity // negative regulation of Rho protein signal transduction // cellular process involved in reproduction // pollen tube development // pollen tube development
AT4G35590	RKD5	RWP-RK domain-containing protein	-1.1679	7.56e-07	regulation of transcription, DNA-dependent
AT5G53592		FBD-like domain family protein	-1.16843	0.000134851	biological_process
AT5G54400		S-adenosyl-L-methionine-dependent methyltransferases superfamily protein	-1.16997	0.000905513	metabolic process
AT5G05300			-1.17097	0.00394846	biological_process // ethylene biosynthetic process // response to chitin // defense response to fungus
AT2G27660		Cysteine/Histidine-rich C1 domain family protein	-1.17442	5.76e-05	respiratory burst involved in defense response // amino acid transport // response to nitrate // response to chitin // nitrate transport // proline transport // oxidation-reduction process
AT2G31945			-1.17542	0.000141388	biological_process // toxin catabolic process // ethylene biosynthetic process // response to cyclopentenone
AT4G35600	Kin4	Protein kinase superfamily protein	-1.17785	0.000119911	protein phosphorylation // protein targeting to membrane // response to mechanical stimulus // systemic acquired resistance // salicylic acid biosynthetic process // abscission // salicylic acid mediated signaling pathway // jasmonic acid mediated signaling pathway // regulation of plant-type hypersensitive response // calcium-mediated signaling
AT1G48180			-1.18059	1.64e-05	biological_process
AT2G32030		Acyl-CoA N-acyltransferases (NAT) superfamily protein	-1.18075	0.000383699	respiratory burst involved in defense response // metabolic process // ethylene biosynthetic process // response to ethylene stimulus // abscisic acid mediated signaling pathway // ethylene mediated signaling pathway // response to chitin // intracellular signal transduction // defense response to fungus
AT1G61440		S-locus lectin protein kinase family protein	-1.18083	4.32e-05	protein phosphorylation // recognition of pollen
AT4G11655		Uncharacterised protein family (UPF0497)	-1.18239	5.5e-07	---
AT5G67450	ZF1	zinc-finger protein 1	-1.18341	0.000844501	regulation of transcription, DNA-dependent // response to cold // response to chitin // hyperosmotic salinity response // negative regulation of transcription, DNA-dependent
AT1G78740		RNI-like superfamily protein	-1.18389	8.93e-05	purine base transport // biological_process
AT2G23270			-1.18395	0.00111177	response to ethylene stimulus // cellular response to hypoxia
AT5G67310	CYP81G1	cytochrome P450, family 81, subfamily G, polypeptide 1	-1.18461	6.33e-05	oxidation-reduction process
AT1G22650	A/N-InvD	Plant neutral invertase family protein	-1.18543	0.00112677	---
AT3G57740		Protein kinase superfamily protein	-1.1863	2.8e-05	protein phosphorylation
AT3G49970		Phototropic-responsive NPH3 family protein	-1.18667	0.000819389	response to light stimulus // response to light stimulus
AT1G04600	XIA	myosin XI A	-1.18856	0.00214291	#N/A
AT4G01430		nodulin MtN21 /EamA-like transporter family protein	-1.1952	0.003948	cell wall modification involved in abscission
AT5G66380	FOLT1	folate transporter 1	-1.19568	1.52e-06	transport // transport // folic acid transport // transmembrane transport
AT3G10320		Glycosyltransferase family 61 protein	-1.19824	0.00138283	organ senescence
AT1G07620	ATOBGM	GTP-binding protein Obg/CgtA	-1.19873	0.000773047	embryo sac egg cell differentiation
AT1G51790		Leucine-rich repeat protein kinase family protein	-1.2001	0.00615932	respiratory burst involved in defense response // protein phosphorylation // oligopeptide transport // amino acid transport // response to chitin
AT1G69930	GSTU11	glutathione S-transferase TAU 11	-1.20196	7.15e-05	fatty acid beta-oxidation // aging // toxin catabolic process // toxin catabolic process // cellular response to phosphate starvation // galactolipid biosynthetic process // cellular response to water deprivation // proteasomal ubiquitin-dependent protein catabolic process // response to misfolded protein // proteasome core complex assembly
AT5G48290		Heavy metal transport/detoxification superfamily protein	-1.20634	0.00164817	metal ion transport
AT3G16460	JAL34	Mannose-binding lectin superfamily protein	-1.20889	0.00011508	response to cold // response to nitrate // nitrate transport // sterol biosynthetic process // brassinosteroid biosynthetic process
AT4G23220	CRK14	cysteine-rich RLK (RECEPTOR-like protein kinase) 14	-1.20931	7.72e-05	response to molecule of bacterial origin // protein phosphorylation // systemic acquired resistance // salicylic acid biosynthetic process
AT5G58575			-1.21027	2.66e-06	biological_process
AT4G23280	CRK20	cysteine-rich RLK (RECEPTOR-like protein kinase) 20	-1.21159	0.00740893	protein phosphorylation // defense response // response to salicylic acid stimulus // programmed cell death // defense response to bacterium
AT1G23840			-1.21254	1.64e-05	---
AT1G45145	TRX5	thioredoxin H-type 5	-1.21406	6.19e-05	glycerol ether metabolic process // response to oxidative stress // response to microbial phytotoxin // cell redox homeostasis // response to cadmium ion // defense response to fungus
AT3G45130	LAS1	lanosterol synthase 1	-1.21462	0.000625031	sterol biosynthetic process // pentacyclic triterpenoid biosynthetic process // pentacyclic triterpenoid biosynthetic process
AT5G17880	CSA1	disease resistance protein (TIR-NBS-LRR class)	-1.21489	2.41e-08	defense response // defense response // signal transduction // response to light stimulus // response to red light // defense response to bacterium
AT1G01560	MPK11	MAP kinase 11	-1.21531	6.34e-08	#N/A
AT1G71140		MATE efflux family protein	-1.21639	0.000225206	drug transmembrane transport // transmembrane transport
AT1G78955	CAMS1	camelliol C synthase 1	-1.21852	8.06e-07	---
AT1G03660		Ankyrin-repeat containing protein	-1.22309	0.000298797	biological_process // transcription factor import into nucleus
AT5G07322		other RNA	-1.2236	2.47e-05	---
AT1G75170		Sec14p-like phosphatidylinositol transfer family protein	-1.22479	3.9e-05	transport
AT3G59830		Integrin-linked protein kinase family	-1.22614	6.42e-06	protein phosphorylation // plant-type cell wall modification // pollen tube growth // regulation of signal transduction // cellular process involved in reproduction // pollen tube development
AT5G24760		GroES-like zinc-binding dehydrogenase family protein	-1.22711	7.6e-05	response to wounding // coumarin biosynthetic process // oxidation-reduction process
AT1G50190		Cysteine/Histidine-rich C1 domain family protein	-1.22782	0.00142873	intracellular signal transduction // oxidation-reduction process
AT2G02340	PP2-B8	phloem protein 2-B8	-1.22966	0.000511195	biological_process
AT5G45380	DUR3	solute:sodium symporters;urea transmembrane transporters	-1.2303	0.000323713	transport // cellular response to nitrogen starvation // transmembrane transport
AT1G24140		Matrixin family protein	-1.23093	0.000103663	proteolysis // proteolysis // metabolic process // ethylene biosynthetic process // response to chitin // endoplasmic reticulum unfolded protein response
AT3G21530		DNAse I-like superfamily protein	-1.23109	1.77e-05	biological_process
AT1G08050		Zinc finger (C3HC4-type RING finger) family protein	-1.23115	1.35e-05	MAPK cascade // N-terminal protein myristoylation // protein targeting to membrane // cell communication // response to cold // response to external stimulus // systemic acquired resistance // cytokinin metabolic process // salicylic acid biosynthetic process // abscisic acid mediated signaling pathway // systemic acquired resistance, salicylic acid mediated signaling pathway // jasmonic acid med…
AT5G54140	ILL3	IAA-leucine-resistant (ILR1)-like 3	-1.23147	1.54e-07	proteolysis // metabolic process // auxin metabolic process
AT4G15280	UGT71B5	UDP-glucosyl transferase 71B5	-1.23266	3.56e-05	metabolic process
AT3G14460		LRR and NB-ARC domains-containing disease resistance protein	-1.23359	2.67e-07	defense response // defense response
AT2G21910	CYP96A5	cytochrome P450, family 96, subfamily A, polypeptide 5	-1.24079	0.00434582	transcription factor import into nucleus // oxidation-reduction process
AT2G19980		CAP (Cysteine-rich secretory proteins, Antigen 5, and Pathogenesis-related 1 protein) superfamily protein	-1.24131	3.92e-06	biological_process
AT4G27050		F-box/RNI-like superfamily protein	-1.24257	2.55e-08	biological_process
AT1G74360		Leucine-rich repeat protein kinase family protein	-1.24339	1.4e-05	MAPK cascade // respiratory burst involved in defense response // protein phosphorylation // protein phosphorylation // protein targeting to membrane // cellular membrane fusion // transmembrane receptor protein tyrosine kinase signaling pathway // detection of external stimulus // detection of biotic stimulus // systemic acquired resistance, salicylic acid mediated signaling pathway // jasmonic …
AT1G24147			-1.24592	0.00699147	#N/A
AT3G50930	BCS1	cytochrome BC1 synthesis	-1.24651	1.4e-06	response to wounding // response to mechanical stimulus // systemic acquired resistance // salicylic acid biosynthetic process // response to chitin // defense response by callose deposition
AT4G18430	RABA1e	RAB GTPase homolog A1E	-1.24685	6.13e-05	small GTPase mediated signal transduction // systemic acquired resistance // protein transport // response to endoplasmic reticulum stress
AT1G69750	COX19-2	cytochrome c oxidase 19-2	-1.24716	0.00020934	biological_process
AT1G69810	WRKY36	WRKY DNA-binding protein 36	-1.24726	2.55e-05	regulation of transcription, DNA-dependent // regulation of transcription, DNA-dependent // inorganic anion transport
AT2G04430	NUDT5	nudix hydrolase homolog 5	-1.24862	1.13e-07	systemic acquired resistance // salicylic acid biosynthetic process // salicylic acid mediated signaling pathway // negative regulation of defense response // innate immune response
AT5G60280		Concanavalin A-like lectin protein kinase family protein	-1.25057	3.13e-05	protein phosphorylation
AT2G32650		RmlC-like cupins superfamily protein	-1.25085	0.000477143	biological_process
AT1G29290			-1.25136	0.00548309	#N/A
AT4G09600	GASA3	GAST1 protein homolog 3	-1.25441	1.43e-05	response to gibberellin stimulus // response to gibberellin stimulus
AT2G14560	LURP1	Protein of unknown function (DUF567)	-1.25529	0.000325938	MAPK cascade // regulation of response to biotic stimulus // protein targeting to membrane // detection of biotic stimulus // salicylic acid biosynthetic process // response to salicylic acid stimulus // systemic acquired resistance, salicylic acid mediated signaling pathway // jasmonic acid mediated signaling pathway // response to chitin // regulation of hydrogen peroxide metabolic process // r…
AT2G40740	WRKY55	WRKY DNA-binding protein 55	-1.25618	0.0041408	regulation of transcription, DNA-dependent // regulation of transcription, DNA-dependent
AT3G48400		Cysteine/Histidine-rich C1 domain family protein	-1.25623	0.000282707	biological_process // oxidation-reduction process
AT1G10040		alpha/beta-Hydrolases superfamily protein	-1.25741	3.74e-06	---
AT2G44230		Plant protein of unknown function (DUF946)	-1.25915	0.00219815	---
AT5G45150	RTL3	RNAse THREE-like protein 3	-1.25922	1.93e-07	RNA processing
AT1G71400	RLP12	receptor like protein 12	-1.25945	0.000669438	response to molecule of bacterial origin // defense response // signal transduction // signal transduction // stomatal complex morphogenesis // response to chitin // stamen development
AT1G12940	NRT2.5	nitrate transporter2.5	-1.26264	0.000253798	#N/A
AT4G04180		P-loop containing nucleoside triphosphate hydrolases superfamily protein	-1.26372	1.04e-05	---
AT2G15480	UGT73B5	UDP-glucosyl transferase 73B5	-1.26456	0.00088615	metabolic process // toxin catabolic process // response to ethylene stimulus // response to cyclopentenone // response to other organism // response to other organism
AT5G23570	SGS3	XS domain-containing protein / XS zinc finger domain-containing protein-related	-1.26492	1.43e-05	virus induced gene silencing // virus induced gene silencing // vegetative phase change // vegetative phase change // production of ta-siRNAs involved in RNA interference // production of ta-siRNAs involved in RNA interference // production of miRNAs involved in gene silencing by miRNA // defense response to virus
AT2G41082			-1.26704	6.89e-07	---
AT3G59750		Concanavalin A-like lectin protein kinase family protein	-1.26714	0.000135196	protein phosphorylation
AT1G62760		Plant invertase/pectin methylesterase inhibitor superfamily protein	-1.26913	0.00237421	---
AT2G05270			-1.26933	1.7e-05	biological_process
AT5G40855			-1.27163	1.32e-06	biological_process
AT1G33840		Protein of unknown function (DUF567)	-1.2725	0.000237476	biological_process
AT5G61250	GUS1	glucuronidase 1	-1.27635	3.2e-07	---
AT5G52540		Protein of unknown function (DUF819)	-1.27681	7.35e-08	---
AT3G46500		2-oxoglutarate (2OG) and Fe(II)-dependent oxygenase superfamily protein	-1.27774	6.2e-07	oxidation-reduction process
AT1G57750	MAH1	cytochrome P450, family 96, subfamily A, polypeptide 15	-1.27785	0.00350288	wax biosynthetic process // oxidation-reduction process
AT1G61420		S-locus lectin protein kinase family protein	-1.27851	0.000131887	protein phosphorylation // recognition of pollen
AT4G16690	MES16	methyl esterase 16	-1.27993	0.000820509	---
AT5G45730		Cysteine/Histidine-rich C1 domain family protein	-1.28001	3.66e-07	biological_process // oxidation-reduction process
AT5G27660		Trypsin family protein with PDZ domain	-1.28025	3.69e-07	proteolysis // proteolysis
AT3G13950			-1.28072	0.000104719	MAPK cascade // response to molecule of bacterial origin // protein targeting to membrane // salicylic acid biosynthetic process // systemic acquired resistance, salicylic acid mediated signaling pathway // salicylic acid mediated signaling pathway // regulation of hydrogen peroxide metabolic process // regulation of plant-type hypersensitive response // negative regulation of defense response //…
AT5G44620	CYP706A3	cytochrome P450, family 706, subfamily A, polypeptide 3	-1.28352	0.000863618	oxidation-reduction process
AT5G28380		Tetratricopeptide repeat (TPR)-like superfamily protein	-1.28381	1.61e-08	biological_process
AT1G30900	VSR6	VACUOLAR SORTING RECEPTOR 6	-1.28449	3.15e-05	#N/A
AT2G37975		Yos1-like protein	-1.28548	1.07e-06	biological_process
AT5G57650		eukaryotic translation initiation factor-related	-1.28604	0.00306199	biological_process
AT4G04695	CPK31	calcium-dependent protein kinase 31	-1.28674	4.01e-06	protein phosphorylation // protein phosphorylation // response to salicylic acid stimulus
AT5G62770		Protein of unknown function (DUF1645)	-1.28801	0.000101276	biological_process
AT5G13840	FZR3	FIZZY-related 3	-1.28854	2.11e-08	microtubule cytoskeleton organization // cytokinesis by cell plate formation // DNA methylation // chromatin silencing // signal transduction // gamete generation // cell proliferation // gene silencing by RNA // regulation of DNA endoreduplication // DNA endoreduplication // regulation of cell proliferation // proteasomal ubiquitin-dependent protein catabolic process // proteasome assembly // sp…
AT3G04181			-1.29101	6.25e-06	biological_process
AT3G43930		BRCT domain-containing DNA repair protein	-1.29218	3.7e-09	biological_process
AT2G45220		Plant invertase/pectin methylesterase inhibitor superfamily	-1.29426	4.97e-05	cell wall modification
AT3G47090		Leucine-rich repeat protein kinase family protein	-1.29434	3.23e-05	protein phosphorylation // protein phosphorylation // transmembrane receptor protein tyrosine kinase signaling pathway
AT3G47350	HSD2	hydroxysteroid dehydrogenase 2	-1.29794	0.0057451	metabolic process
AT2G07000			-1.30177	0.000913787	biological_process
AT5G49680	KIP	Golgi-body localisation protein domain ;RNA pol II promoter Fmp27 protein domain	-1.30309	0.000425197	---
AT4G23610		Late embryogenesis abundant (LEA) hydroxyproline-rich glycoprotein family	-1.30319	1.31e-05	biological_process
AT2G29100	GLR2.9	glutamate receptor 2.9	-1.30622	0.000798603	transport // cellular calcium ion homeostasis // response to light stimulus // cellular cation homeostasis
AT3G53150	UGT73D1	UDP-glucosyl transferase 73D1	-1.30771	0.000785053	amino acid transport // metabolic process
AT3G26500	PIRL2	plant intracellular ras group-related LRR 2	-1.30949	0.00545992	biological_process
AT3G60966		RING/U-box superfamily protein	-1.31067	3.87e-06	biological_process
AT4G23810	WRKY53	WRKY family transcription factor	-1.3154	0.00196317	MAPK cascade // regulation of response to biotic stimulus // regulation of transcription, DNA-dependent // regulation of transcription, DNA-dependent // protein targeting to membrane // detection of biotic stimulus // salicylic acid biosynthetic process // response to salicylic acid stimulus // defense response to bacterium, incompatible interaction // systemic acquired resistance, salicylic acid…
AT2G25090	SnRK3.18	CBL-interacting protein kinase 16	-1.31656	4.31e-05	protein phosphorylation // signal transduction
AT5G55560		Protein kinase superfamily protein	-1.31805	1.3e-08	protein phosphorylation // organ senescence
AT1G75700	HVA22G	HVA22-like protein G	-1.31831	5.7e-05	biological_process
AT4G23320	CRK24	cysteine-rich RLK (RECEPTOR-like protein kinase) 24	-1.31864	0.000342676	MAPK cascade // protein phosphorylation // defense response, incompatible interaction
AT3G47480		Calcium-binding EF-hand family protein	-1.32058	0.000206458	MAPK cascade // response to molecule of bacterial origin // respiratory burst involved in defense response // protein targeting to membrane // cellular membrane fusion // biological_process // detection of external stimulus // detection of biotic stimulus // systemic acquired resistance // salicylic acid biosynthetic process // defense response, incompatible interaction // systemic acquired resis…
AT5G54610	ANK	ankyrin	-1.32337	0.00226868	MAPK cascade // protein targeting to membrane // salicylic acid biosynthetic process // response to salicylic acid stimulus // systemic acquired resistance, salicylic acid mediated signaling pathway // jasmonic acid mediated signaling pathway // regulation of hydrogen peroxide metabolic process // regulation of plant-type hypersensitive response // negative regulation of defense response // defen…
AT3G63480		ATP binding microtubule motor family protein	-1.32424	2.87e-07	DNA-dependent DNA replication // microtubule-based movement
AT5G19100		Eukaryotic aspartyl protease family protein	-1.32853	2.55e-05	proteolysis
AT5G29231			-1.32859	2.51e-05	biological_process
AT3G25780	AOC3	allene oxide cyclase 3	-1.32995	3.16e-07	protein targeting to membrane // response to wounding // response to fungus // response to fungus // response to salt stress // jasmonic acid biosynthetic process // jasmonic acid biosynthetic process // response to ethylene stimulus // abscisic acid mediated signaling pathway // response to jasmonic acid stimulus // salicylic acid mediated signaling pathway // regulation of plant-type hypersensi…
AT4G14390		Ankyrin repeat family protein	-1.33015	0.000158426	biological_process
AT2G18193		P-loop containing nucleoside triphosphate hydrolases superfamily protein	-1.33335	0.00554741	---
AT3G13790	ATCWINV1	Glycosyl hydrolases family 32 protein	-1.33388	0.000312433	respiratory burst involved in defense response // carbohydrate metabolic process // amino acid transport // response to wounding // response to nitrate // response to chitin // nitrate transport // response to karrikin
AT5G57567			-1.33519	0.000511048	biological_process
AT1G58242		Plant thionin family protein	-1.33558	1.39e-06	biological_process
AT2G29910		F-box/RNI-like superfamily protein	-1.33766	5.38e-06	biological_process
AT5G02490	Hsp70-2	Heat shock protein 70 (Hsp 70) family protein	-1.34312	0.00352878	protein folding // protein folding // response to heat // response to heat // response to virus // response to bacterium // systemic acquired resistance // response to high light intensity // salicylic acid biosynthetic process // endoplasmic reticulum unfolded protein response // response to hydrogen peroxide // response to cadmium ion
AT4G13560	UNE15	Late embryogenesis abundant protein (LEA) family protein	-1.34345	4.34e-08	double fertilization forming a zygote and endosperm // embryo development ending in seed dormancy
AT5G54700		Ankyrin repeat family protein	-1.34494	3.03e-05	biological_process
AT1G35210			-1.34556	0.00179451	ethylene biosynthetic process // response to UV-B
AT5G38710		Methylenetetrahydrofolate reductase family protein	-1.34639	0.000387222	glutamate biosynthetic process // glutamate biosynthetic process // proline catabolic process // proline catabolic process // proline catabolic process // protein targeting to membrane // response to osmotic stress // toxin catabolic process // response to water deprivation // response to wounding // response to fungus // jasmonic acid biosynthetic process // response to jasmonic acid stimulus //…
AT1G51538		Aminotransferase-like, plant mobile domain family protein	-1.35077	3.88e-10	biological_process
AT3G23635	RTFL13	ROTUNDIFOLIA like 13	-1.35159	0.00017505	---
AT5G42440		Protein kinase superfamily protein	-1.35396	7.61e-07	protein phosphorylation
AT1G78410		VQ motif-containing protein	-1.35738	0.00106131	MAPK cascade // regulation of response to biotic stimulus // protein targeting to membrane // response to oxidative stress // response to oxidative stress // detection of biotic stimulus // response to wounding // salicylic acid biosynthetic process // response to ethylene stimulus // systemic acquired resistance, salicylic acid mediated signaling pathway // jasmonic acid mediated signaling pathw…
AT4G30640		RNI-like superfamily protein	-1.36419	2.36e-06	ubiquitin-dependent protein catabolic process
AT3G29570			-1.36563	1.2e-06	---
AT2G15042		Leucine-rich repeat (LRR) family protein	-1.36638	4.67e-06	biological_process
AT1G46554		other RNA	-1.36686	9.95e-08	#N/A
AT1G50520	CYP705A27	cytochrome P450, family 705, subfamily A, polypeptide 27	-1.36892	0.000178479	oxidation-reduction process
AT2G13430			-1.3695	0.000208491	biological_process
AT3G13435			-1.37283	1.34e-06	biological_process
AT5G08240			-1.37422	0.000136613	biological_process
AT1G65690		Late embryogenesis abundant (LEA) hydroxyproline-rich glycoprotein family	-1.37657	2.1e-06	amino acid transport // biological_process // systemic acquired resistance // response to endoplasmic reticulum stress
AT3G48020			-1.37668	4.49e-06	biological_process
AT5G46960		Plant invertase/pectin methylesterase inhibitor superfamily protein	-1.37678	0.000841222	---
AT2G21220		SAUR-like auxin-responsive protein family	-1.37905	5e-05	response to auxin stimulus
AT1G71990	FUT13	fucosyltransferase 13	-1.38003	5.13e-08	protein glycosylation // Lewis a epitope biosynthetic process
AT5G55460		Bifunctional inhibitor/lipid-transfer protein/seed storage 2S albumin superfamily protein	-1.38182	9.99e-06	lipid transport
AT5G26920	CBP60G	Cam-binding protein 60-like G	-1.38276	1e-05	MAPK cascade // response to molecule of bacterial origin // response to molecule of bacterial origin // regulation of response to biotic stimulus // protein targeting to membrane // cellular membrane fusion // response to cold // detection of biotic stimulus // response to bacterium // systemic acquired resistance // salicylic acid biosynthetic process // salicylic acid biosynthetic process // de…
AT4G24030			-1.38319	5.45e-06	biological_process
AT5G10760		Eukaryotic aspartyl protease family protein	-1.38487	7.98e-05	MAPK cascade // proteolysis // proteolysis // systemic acquired resistance // defense response, incompatible interaction // response to endoplasmic reticulum stress
AT5G56370		F-box/RNI-like/FBD-like domains-containing protein	-1.38737	4.77e-09	biological_process
AT1G20610	CYCB2;3	Cyclin B2;3	-1.39141	5.3e-06	regulation of cyclin-dependent protein kinase activity // regulation of cell cycle // regulation of cell cycle
AT3G18250		Putative membrane lipoprotein	-1.39293	1.08e-05	biological_process // amino acid import
AT1G14070	FUT7	fucosyltransferase 7	-1.39398	6.55e-07	#N/A
AT1G76240		Arabidopsis protein of unknown function (DUF241)	-1.39719	0.00996973	---
AT4G23230	CRK15	cysteine-rich RLK (RECEPTOR-like protein kinase) 15	-1.39787	0.000184921	protein phosphorylation
AT3G23010	RLP36	receptor like protein 36	-1.39995	0.00095228	response to molecule of bacterial origin // defense response // signal transduction // signal transduction // stomatal complex morphogenesis // stamen development
AT2G46400	WRKY46	WRKY DNA-binding protein 46	-1.40253	0.000450672	regulation of transcription, DNA-dependent // regulation of transcription, DNA-dependent // regulation of transcription, DNA-dependent // systemic acquired resistance // salicylic acid biosynthetic process // response to chitin
[truncated: 367 more rows]

## Sheet: GO terms for all DEGs
	GOBPID	Pvalue	Log2 fold change, (Col-0)−(C24)	ExpCount	Count	Size	Term	inGenes	inGenesName
1	GO:0006952	7.45e-45	2.81678	139.153	312	1644	defense response	AT1G09665;AT1G16130;AT1G17610;AT1G17615;AT1G23120;AT1G24150;AT1G27180;AT1G30900;AT1G31580;AT1G33600;AT1G34420;AT1G35710;AT1G49860;AT1G52400;AT1G52410;AT1G56540;AT1G57630;AT1G57850;AT1G58848;AT1G65850;AT1G70690;AT1G72870;AT1G72890;AT1G72930;AT1G75040;AT1G78410;AT1G02360;AT1G02450;AT1G03850;AT1G07000;AT1G10340;AT1G13340;AT1G13470;AT1G13750;AT1G15520;AT1G19250;AT1G28480;AT1G51790;AT1G51890;AT1G52030…
2	GO:0009697	5.11e-42	8.66393	17.5211	90	207	salicylic acid biosynthetic process	AT1G17610;AT1G24150;AT1G30900;AT1G31580;AT1G34420;AT1G57630;AT1G75040;AT1G78410;AT1G02450;AT1G07000;AT1G10340;AT1G13340;AT1G13470;AT1G15520;AT1G73805;AT2G04450;AT2G14560;AT2G34940;AT2G14610;AT2G26560;AT2G30770;AT2G40750;AT2G45760;AT2G46400;AT3G09020;AT3G13950;AT3G26830;AT3G47380;AT3G47480;AT3G48080;AT3G48090;AT3G48640;AT3G52400;AT3G56400;AT3G56710;AT3G57240;AT3G57260;AT4G10500;AT4G11890;AT4G23150…
3	GO:0009696	3.26e-41	8.0997	18.6215	92	220	salicylic acid metabolic process	AT1G17610;AT1G24150;AT1G30900;AT1G31580;AT1G34420;AT1G57630;AT1G75040;AT1G78410;AT1G02450;AT1G07000;AT1G10340;AT1G13340;AT1G13470;AT1G15520;AT1G73805;AT2G04450;AT2G14560;AT2G34940;AT2G43820;AT2G14610;AT2G26560;AT2G30770;AT2G40750;AT2G45760;AT2G46400;AT3G09020;AT3G13950;AT3G26830;AT3G47380;AT3G47480;AT3G48080;AT3G48090;AT3G48640;AT3G52400;AT3G56400;AT3G56710;AT3G57240;AT3G57260;AT4G10500;AT4G11890…
4	GO:0009627	6.58e-41	4.97127	37.4122	134	442	systemic acquired resistance	AT1G17610;AT1G24150;AT1G30900;AT1G33600;AT1G34420;AT1G49860;AT1G75040;AT1G78410;AT1G02450;AT1G07000;AT1G10340;AT1G13470;AT1G13750;AT1G15520;AT1G19250;AT1G28480;AT1G73805;AT2G04450;AT2G13810;AT2G14560;AT2G34940;AT2G35980;AT2G14610;AT2G18660;AT2G26400;AT2G26560;AT2G30770;AT2G32680;AT2G39210;AT2G40750;AT2G45760;AT2G46400;AT3G09020;AT3G13950;AT3G26830;AT3G28510;AT3G47380;AT3G01420;AT3G25010;AT3G47480…
5	GO:0009814	1.53e-39	4.3776	45.0301	147	532	defense response, incompatible interaction	AT1G17610;AT1G24150;AT1G30900;AT1G31580;AT1G33600;AT1G34420;AT1G35710;AT1G49860;AT1G57630;AT1G75040;AT1G78410;AT1G02450;AT1G07000;AT1G10340;AT1G13470;AT1G13750;AT1G15520;AT1G19250;AT1G28480;AT1G73805;AT2G04450;AT2G13810;AT2G14560;AT2G17040;AT2G34940;AT2G35980;AT2G14610;AT2G18660;AT2G26400;AT2G26560;AT2G30770;AT2G32680;AT2G39210;AT2G40750;AT2G45760;AT2G46400;AT3G09020;AT3G13950;AT3G26830;AT3G28510…
6	GO:0042537	8.07e-38	6.68147	21.8379	96	258	benzene-containing compound metabolic process	AT1G17610;AT1G24150;AT1G30900;AT1G31580;AT1G34420;AT1G57630;AT1G75040;AT1G78410;AT1G02450;AT1G07000;AT1G10340;AT1G13340;AT1G13470;AT1G15520;AT1G73805;AT2G04450;AT2G14560;AT2G34940;AT2G43820;AT2G14610;AT2G26560;AT2G30770;AT2G40750;AT2G45760;AT2G46400;AT3G09020;AT3G13950;AT3G26830;AT3G47380;AT3G47480;AT3G48080;AT3G48090;AT3G48640;AT3G52400;AT3G56400;AT3G56710;AT3G57240;AT3G57260;AT4G10500;AT4G11890…
7	GO:0002376	3.81e-31	2.90039	82.6963	196	977	immune system process	AT1G09665;AT1G17610;AT1G24150;AT1G30900;AT1G31580;AT1G33600;AT1G34420;AT1G35710;AT1G49860;AT1G57630;AT1G75040;AT1G78410;AT1G02360;AT1G02450;AT1G07000;AT1G10340;AT1G13340;AT1G13470;AT1G13750;AT1G15520;AT1G19250;AT1G28480;AT1G51790;AT1G51890;AT1G73805;AT2G04450;AT2G13810;AT2G14560;AT2G17040;AT2G34940;AT2G35980;AT2G14610;AT2G18660;AT2G26400;AT2G26560;AT2G27660;AT2G30770;AT2G32030;AT2G32680;AT2G39210…
8	GO:0045087	4.67e-31	3.05166	72.7084	180	859	innate immune response	AT1G09665;AT1G17610;AT1G24150;AT1G30900;AT1G31580;AT1G33600;AT1G34420;AT1G35710;AT1G49860;AT1G57630;AT1G75040;AT1G78410;AT1G02450;AT1G07000;AT1G10340;AT1G13340;AT1G13470;AT1G13750;AT1G15520;AT1G19250;AT1G28480;AT1G51890;AT1G73805;AT2G04450;AT2G13810;AT2G14560;AT2G17040;AT2G34940;AT2G35980;AT2G14610;AT2G18660;AT2G26400;AT2G26560;AT2G30770;AT2G32680;AT2G39210;AT2G40750;AT2G45760;AT2G46400;AT3G09020…
9	GO:0006955	1.16e-30	3.02407	73.2163	180	865	immune response	AT1G09665;AT1G17610;AT1G24150;AT1G30900;AT1G31580;AT1G33600;AT1G34420;AT1G35710;AT1G49860;AT1G57630;AT1G75040;AT1G78410;AT1G02450;AT1G07000;AT1G10340;AT1G13340;AT1G13470;AT1G13750;AT1G15520;AT1G19250;AT1G28480;AT1G51890;AT1G73805;AT2G04450;AT2G13810;AT2G14560;AT2G17040;AT2G34940;AT2G35980;AT2G14610;AT2G18660;AT2G26400;AT2G26560;AT2G30770;AT2G32680;AT2G39210;AT2G40750;AT2G45760;AT2G46400;AT3G09020…
10	GO:0071446	7.93e-27	4.31888	29.879	98	353	cellular response to salicylic acid stimulus	AT1G17610;AT1G33600;AT1G34420;AT1G49860;AT1G57630;AT1G75040;AT1G78410;AT1G02450;AT1G07000;AT1G13340;AT1G13470;AT1G15520;AT1G28480;AT1G51890;AT1G73805;AT2G04450;AT2G13810;AT2G14560;AT2G35980;AT2G14610;AT2G26400;AT2G26560;AT2G30770;AT2G32680;AT2G40750;AT3G09020;AT3G13950;AT3G25780;AT3G26830;AT3G28510;AT3G47380;AT3G01420;AT3G08720;AT3G22160;AT3G47480;AT3G48090;AT3G48640;AT3G52400;AT3G56400;AT3G56710…
11	GO:0050832	1.72e-26	4.347	29.1172	96	344	defense response to fungus	AT1G16130;AT1G17610;AT1G52400;AT1G52410;AT1G75040;AT1G78410;AT1G02360;AT1G02450;AT1G03850;AT1G07000;AT1G13470;AT1G15520;AT1G19250;AT1G28480;AT1G51890;AT1G73805;AT2G04450;AT2G14560;AT2G35980;AT2G14610;AT2G26560;AT2G30770;AT2G32030;AT2G39210;AT2G40750;AT3G09020;AT3G11340;AT3G13950;AT3G25780;AT3G26830;AT3G47380;AT3G16530;AT3G44480;AT3G47480;AT3G48090;AT3G48640;AT3G52400;AT3G56400;AT3G56710;AT3G57240…
12	GO:0009863	2.13e-26	4.28958	29.7097	97	351	salicylic acid mediated signaling pathway	AT1G17610;AT1G33600;AT1G34420;AT1G49860;AT1G57630;AT1G75040;AT1G78410;AT1G02450;AT1G07000;AT1G13340;AT1G13470;AT1G15520;AT1G28480;AT1G51890;AT1G73805;AT2G04450;AT2G13810;AT2G14560;AT2G35980;AT2G14610;AT2G26400;AT2G26560;AT2G30770;AT2G32680;AT2G40750;AT3G09020;AT3G13950;AT3G25780;AT3G26830;AT3G28510;AT3G47380;AT3G08720;AT3G22160;AT3G47480;AT3G48090;AT3G48640;AT3G52400;AT3G56400;AT3G56710;AT3G57240…
13	GO:0031348	8.11e-26	4.88556	23.1076	83	273	negative regulation of defense response	AT1G17610;AT1G33600;AT1G34420;AT1G57630;AT1G75040;AT1G78410;AT1G02450;AT1G07000;AT1G13340;AT1G13470;AT1G15520;AT1G28480;AT1G73805;AT2G04450;AT2G14560;AT2G35980;AT2G14610;AT2G26560;AT2G30770;AT2G32680;AT2G40750;AT3G09020;AT3G13950;AT3G26830;AT3G47380;AT3G47480;AT3G48090;AT3G48640;AT3G52400;AT3G56400;AT3G56710;AT3G57240;AT3G57260;AT4G11890;AT4G26120;AT4G39030;AT4G04490;AT4G14365;AT4G23810;AT4G35180…
14	GO:0009751	5.46e-25	3.57846	39.6976	113	469	response to salicylic acid stimulus	AT1G17610;AT1G33600;AT1G34420;AT1G49860;AT1G57630;AT1G75040;AT1G78410;AT1G02450;AT1G07000;AT1G13340;AT1G13470;AT1G15520;AT1G28480;AT1G51890;AT1G73260;AT1G73805;AT1G79680;AT2G04450;AT2G13810;AT2G14560;AT2G35980;AT2G47190;AT2G14610;AT2G26400;AT2G26560;AT2G30770;AT2G32680;AT2G40750;AT3G09020;AT3G13950;AT3G25780;AT3G26830;AT3G28510;AT3G47380;AT3G01420;AT3G08720;AT3G22160;AT3G47480;AT3G48090;AT3G48640…
15	GO:0009607	1.79e-24	2.29842	119.601	234	1413	response to biotic stimulus	AT1G16130;AT1G17610;AT1G24150;AT1G30900;AT1G31580;AT1G32960;AT1G33600;AT1G34420;AT1G35710;AT1G49860;AT1G52400;AT1G52410;AT1G57630;AT1G61800;AT1G70690;AT1G74080;AT1G75040;AT1G78410;AT1G02360;AT1G02450;AT1G03850;AT1G07000;AT1G10340;AT1G13470;AT1G13750;AT1G15520;AT1G19250;AT1G28480;AT1G51890;AT1G54040;AT1G73260;AT1G73805;AT1G79680;AT2G04450;AT2G13810;AT2G14560;AT2G15480;AT2G17040;AT2G26820;AT2G29350…
16	GO:0051707	3.75e-24	2.2873	119.516	233	1412	response to other organism	AT1G16130;AT1G17610;AT1G24150;AT1G30900;AT1G31580;AT1G33600;AT1G34420;AT1G35710;AT1G49860;AT1G52400;AT1G52410;AT1G57630;AT1G61800;AT1G70690;AT1G74080;AT1G75040;AT1G78410;AT1G02360;AT1G02450;AT1G03850;AT1G07000;AT1G10340;AT1G13470;AT1G13750;AT1G15520;AT1G19250;AT1G28480;AT1G51890;AT1G54040;AT1G73260;AT1G73805;AT1G79680;AT2G04450;AT2G13810;AT2G14560;AT2G15480;AT2G17040;AT2G26820;AT2G29350;AT2G34940…
17	GO:0009862	9.59e-24	4.87073	21.1608	76	250	systemic acquired resistance, salicylic acid mediated signaling pathway	AT1G17610;AT1G33600;AT1G49860;AT1G75040;AT1G78410;AT1G02450;AT1G07000;AT1G13470;AT1G15520;AT1G28480;AT1G73805;AT2G04450;AT2G13810;AT2G14560;AT2G35980;AT2G14610;AT2G26400;AT2G26560;AT2G30770;AT2G32680;AT2G40750;AT3G09020;AT3G13950;AT3G26830;AT3G28510;AT3G47380;AT3G47480;AT3G48090;AT3G48640;AT3G52400;AT3G56400;AT3G56710;AT3G57240;AT3G57260;AT4G11890;AT4G13510;AT4G39030;AT4G04490;AT4G14365;AT4G23810…
18	GO:0031347	9.06e-22	3.12258	45.6226	117	539	regulation of defense response	AT1G09665;AT1G17610;AT1G33600;AT1G34420;AT1G57630;AT1G75040;AT1G78410;AT1G02450;AT1G07000;AT1G13340;AT1G13470;AT1G13750;AT1G15520;AT1G19250;AT1G28480;AT1G51890;AT1G73805;AT2G04450;AT2G14560;AT2G35980;AT2G14610;AT2G26560;AT2G30770;AT2G32680;AT2G40750;AT3G01080;AT3G09020;AT3G13950;AT3G25780;AT3G26830;AT3G47380;AT3G08720;AT3G22160;AT3G47480;AT3G48090;AT3G48640;AT3G52400;AT3G56400;AT3G56710;AT3G57240…
19	GO:0007243	6.73e-21	4.80207	18.7908	67	222	intracellular protein kinase cascade	AT1G17610;AT1G33600;AT1G35710;AT1G57630;AT1G75040;AT1G78410;AT1G02450;AT1G13470;AT1G15520;AT1G28480;AT1G73805;AT2G04450;AT2G14560;AT2G17040;AT2G35980;AT2G14610;AT2G26560;AT2G30770;AT2G32680;AT2G40750;AT3G09020;AT3G13950;AT3G26830;AT3G47380;AT3G47480;AT3G48090;AT3G48640;AT3G52400;AT3G56400;AT3G56710;AT3G57240;AT3G57260;AT4G11890;AT4G39030;AT4G04490;AT4G14365;AT4G23320;AT4G23810;AT5G24530;AT5G26920…
20	GO:0080134	7.83e-21	3.00552	47.4001	118	560	regulation of response to stress	AT1G09665;AT1G17610;AT1G33600;AT1G34420;AT1G57630;AT1G75040;AT1G78410;AT1G02450;AT1G07000;AT1G13340;AT1G13470;AT1G13750;AT1G15520;AT1G19250;AT1G28480;AT1G51890;AT1G73805;AT2G04450;AT2G14560;AT2G35980;AT2G14610;AT2G26560;AT2G30770;AT2G32680;AT2G40750;AT3G01080;AT3G09020;AT3G13950;AT3G25780;AT3G26830;AT3G47380;AT3G08720;AT3G22160;AT3G47480;AT3G48090;AT3G48640;AT3G52400;AT3G56400;AT3G56710;AT3G57240…
21	GO:0007165	1.17e-20	1.97641	164.885	283	1948	signal transduction	AT1G05200;AT1G06620;AT1G07410;AT1G09665;AT1G12340;AT1G15080;AT1G17250;AT1G17350;AT1G17610;AT1G17615;AT1G27180;AT1G33600;AT1G34420;AT1G35710;AT1G49860;AT1G51270;AT1G52400;AT1G56540;AT1G57630;AT1G57850;AT1G60983;AT1G61840;AT1G65850;AT1G75390;AT1G72870;AT1G72890;AT1G72930;AT1G75040;AT1G78410;AT1G02440;AT1G02450;AT1G07000;AT1G13340;AT1G13470;AT1G15520;AT1G17240;AT1G19250;AT1G27190;AT1G27940;AT1G28480…
22	GO:0000165	1.88e-20	4.75887	18.6215	66	220	MAPK cascade	AT1G17610;AT1G33600;AT1G35710;AT1G57630;AT1G75040;AT1G78410;AT1G02450;AT1G13470;AT1G15520;AT1G28480;AT1G73805;AT2G04450;AT2G14560;AT2G17040;AT2G35980;AT2G14610;AT2G26560;AT2G30770;AT2G32680;AT2G40750;AT3G09020;AT3G13950;AT3G26830;AT3G47380;AT3G47480;AT3G48090;AT3G48640;AT3G52400;AT3G56400;AT3G56710;AT3G57240;AT3G57260;AT4G11890;AT4G39030;AT4G04490;AT4G14365;AT4G23320;AT4G23810;AT5G24530;AT5G26920…
23	GO:0007154	2.33e-20	1.877	200.35	327	2367	cell communication	AT1G05200;AT1G06620;AT1G07410;AT1G08310;AT1G09665;AT1G12340;AT1G15080;AT1G17250;AT1G17350;AT1G17610;AT1G17615;AT1G27180;AT1G33600;AT1G34420;AT1G35710;AT1G49860;AT1G51270;AT1G52400;AT1G56540;AT1G57630;AT1G57850;AT1G60983;AT1G61840;AT1G65850;AT1G75390;AT1G72870;AT1G72890;AT1G72930;AT1G75040;AT1G78410;AT1G02440;AT1G02450;AT1G07000;AT1G13340;AT1G13470;AT1G15520;AT1G17240;AT1G19250;AT1G27190;AT1G27940…
24	GO:0010243	4e-20	3.30034	36.8197	99	435	response to organic nitrogen	AT1G05200;AT1G16130;AT1G75040;AT1G78410;AT1G02360;AT1G02450;AT1G07000;AT1G15520;AT1G51790;AT1G73805;AT2G04450;AT2G14560;AT2G17040;AT2G35980;AT2G14610;AT2G25460;AT2G26560;AT2G27660;AT2G30770;AT2G32030;AT2G33580;AT2G40750;AT2G43620;AT2G46400;AT3G09010;AT3G09020;AT3G26830;AT3G47380;AT3G08720;AT3G13790;AT3G16530;AT3G44350;AT3G46080;AT3G46090;AT3G47480;AT3G48090;AT3G52400;AT3G56400;AT3G56770;AT3G57240…
25	GO:0051704	9.22e-20	1.98666	152.527	264	1802	multi-organism process	AT1G16130;AT1G17610;AT1G24150;AT1G30900;AT1G31580;AT1G33600;AT1G34420;AT1G35710;AT1G49860;AT1G52400;AT1G52410;AT1G57630;AT1G61800;AT1G63530;AT1G70690;AT1G74080;AT1G75040;AT1G78410;AT1G02360;AT1G02450;AT1G03850;AT1G07000;AT1G10340;AT1G13470;AT1G13750;AT1G15520;AT1G19250;AT1G28480;AT1G51890;AT1G53690;AT1G54040;AT1G61440;AT1G61490;AT1G61500;AT1G69120;AT1G73260;AT1G73805;AT1G79680;AT2G04450;AT2G13810…
26	GO:0010310	9.68e-20	5.14641	15.7436	59	186	regulation of hydrogen peroxide metabolic process	AT1G17610;AT1G33600;AT1G49860;AT1G75040;AT1G78410;AT1G02450;AT1G13470;AT1G15520;AT1G28480;AT1G73805;AT2G04450;AT2G14560;AT2G35980;AT2G14610;AT2G26400;AT2G26560;AT2G30770;AT2G32680;AT2G40750;AT3G09020;AT3G13950;AT3G26830;AT3G28510;AT3G47380;AT3G47480;AT3G48090;AT3G48640;AT3G52400;AT3G56400;AT3G56710;AT3G57240;AT3G57260;AT4G11890;AT4G13510;AT4G39030;AT4G14365;AT4G23810;AT5G09290;AT5G11920;AT5G24530…
27	GO:0009595	9.81e-20	7.76888	8.80288	43	104	detection of biotic stimulus	AT1G32960;AT1G75040;AT1G78410;AT1G02450;AT1G10340;AT1G15520;AT1G73805;AT2G04450;AT2G14560;AT2G14610;AT2G26560;AT2G30770;AT2G40750;AT3G09010;AT3G09020;AT3G26830;AT3G47380;AT3G47480;AT3G48090;AT3G52400;AT3G56400;AT3G57240;AT3G57260;AT4G11890;AT4G39030;AT4G14365;AT4G23810;AT5G24530;AT5G26920;AT5G52760;AT5G55450;AT5G22570;AT1G01560;AT1G74360;AT1G74710;AT2G25000;AT2G35650;AT3G52430;AT3G11820;AT3G11840…
28	GO:0010200	1.3e-19	3.30514	35.6347	96	421	response to chitin	AT1G16130;AT1G75040;AT1G78410;AT1G02360;AT1G02450;AT1G07000;AT1G15520;AT1G51790;AT1G73805;AT2G04450;AT2G14560;AT2G17040;AT2G35980;AT2G14610;AT2G25460;AT2G26560;AT2G27660;AT2G30770;AT2G32030;AT2G33580;AT2G40750;AT2G43620;AT2G46400;AT3G09010;AT3G09020;AT3G26830;AT3G47380;AT3G08720;AT3G13790;AT3G16530;AT3G44350;AT3G46080;AT3G46090;AT3G47480;AT3G48090;AT3G52400;AT3G56400;AT3G56770;AT3G57240;AT3G57260…
29	GO:0044700	1.3e-19	1.9242	171.572	288	2027	single organism signaling	AT1G05200;AT1G06620;AT1G07410;AT1G09665;AT1G12340;AT1G15080;AT1G17250;AT1G17350;AT1G17610;AT1G17615;AT1G27180;AT1G33600;AT1G34420;AT1G35710;AT1G49860;AT1G51270;AT1G52400;AT1G56540;AT1G57630;AT1G57850;AT1G60983;AT1G61840;AT1G65850;AT1G75390;AT1G72870;AT1G72890;AT1G72930;AT1G75040;AT1G78410;AT1G02440;AT1G02450;AT1G07000;AT1G13340;AT1G13470;AT1G15520;AT1G17240;AT1G19250;AT1G27190;AT1G27940;AT1G28480…
30	GO:0023052	1.4e-19	1.923	171.656	288	2028	signaling	AT1G05200;AT1G06620;AT1G07410;AT1G09665;AT1G12340;AT1G15080;AT1G17250;AT1G17350;AT1G17610;AT1G17615;AT1G27180;AT1G33600;AT1G34420;AT1G35710;AT1G49860;AT1G51270;AT1G52400;AT1G56540;AT1G57630;AT1G57850;AT1G60983;AT1G61840;AT1G65850;AT1G75390;AT1G72870;AT1G72890;AT1G72930;AT1G75040;AT1G78410;AT1G02440;AT1G02450;AT1G07000;AT1G13340;AT1G13470;AT1G15520;AT1G17240;AT1G19250;AT1G27190;AT1G27940;AT1G28480…
31	GO:0045088	2.15e-19	3.29991	35.2962	95	417	regulation of innate immune response	AT1G09665;AT1G17610;AT1G33600;AT1G57630;AT1G75040;AT1G78410;AT1G02450;AT1G07000;AT1G13470;AT1G15520;AT1G19250;AT1G28480;AT1G51890;AT1G73805;AT2G04450;AT2G14560;AT2G35980;AT2G14610;AT2G26560;AT2G30770;AT2G32680;AT2G40750;AT3G09020;AT3G13950;AT3G25780;AT3G26830;AT3G47380;AT3G08720;AT3G22160;AT3G47480;AT3G48090;AT3G48640;AT3G52400;AT3G56400;AT3G56710;AT3G57240;AT3G57260;AT4G11890;AT4G13510;AT4G39030…
32	GO:0050776	3.05e-19	3.27924	35.4655	95	419	regulation of immune response	AT1G09665;AT1G17610;AT1G33600;AT1G57630;AT1G75040;AT1G78410;AT1G02450;AT1G07000;AT1G13470;AT1G15520;AT1G19250;AT1G28480;AT1G51890;AT1G73805;AT2G04450;AT2G14560;AT2G35980;AT2G14610;AT2G26560;AT2G30770;AT2G32680;AT2G40750;AT3G09020;AT3G13950;AT3G25780;AT3G26830;AT3G47380;AT3G08720;AT3G22160;AT3G47480;AT3G48090;AT3G48640;AT3G52400;AT3G56400;AT3G56710;AT3G57240;AT3G57260;AT4G11890;AT4G13510;AT4G39030…
33	GO:0009620	4.24e-19	3.02423	42.2369	106	499	response to fungus	AT1G16130;AT1G17610;AT1G52400;AT1G52410;AT1G75040;AT1G78410;AT1G02360;AT1G02450;AT1G03850;AT1G07000;AT1G13470;AT1G15520;AT1G19250;AT1G28480;AT1G51890;AT1G73805;AT1G79680;AT2G04450;AT2G14560;AT2G35980;AT2G14610;AT2G26560;AT2G30770;AT2G32030;AT2G39210;AT2G40750;AT3G09020;AT3G11340;AT3G13950;AT3G20200;AT3G25780;AT3G26830;AT3G47380;AT3G16530;AT3G19260;AT3G44480;AT3G47480;AT3G48090;AT3G48640;AT3G52400…
34	GO:0002682	5.09e-19	3.24869	35.7194	95	422	regulation of immune system process	AT1G09665;AT1G17610;AT1G33600;AT1G57630;AT1G75040;AT1G78410;AT1G02450;AT1G07000;AT1G13470;AT1G15520;AT1G19250;AT1G28480;AT1G51890;AT1G73805;AT2G04450;AT2G14560;AT2G35980;AT2G14610;AT2G26560;AT2G30770;AT2G32680;AT2G40750;AT3G09020;AT3G13950;AT3G25780;AT3G26830;AT3G47380;AT3G08720;AT3G22160;AT3G47480;AT3G48090;AT3G48640;AT3G52400;AT3G56400;AT3G56710;AT3G57240;AT3G57260;AT4G11890;AT4G13510;AT4G39030…
35	GO:0043069	6.13e-19	5.29016	14.3893	55	170	negative regulation of programmed cell death	AT1G75040;AT1G07000;AT1G15520;AT1G28480;AT1G51890;AT2G14560;AT2G35980;AT2G26560;AT3G13950;AT3G25780;AT3G22160;AT3G47480;AT3G48090;AT3G52400;AT3G56400;AT3G57260;AT4G13510;AT4G04490;AT4G14365;AT4G19700;AT4G25110;AT5G13490;AT5G26920;AT5G40780;AT5G52760;AT5G22570;AT5G54610;AT1G01560;AT1G21250;AT1G72900;AT1G74360;AT1G74710;AT1G08050;AT1G64610;AT1G69270;AT2G25000;AT3G02840;AT3G09830;AT3G20410;AT3G52430…
36	GO:0014070	9.3e-19	2.4341	72.7084	152	859	response to organic cyclic compound	AT1G17610;AT1G24530;AT1G33600;AT1G34420;AT1G49860;AT1G57630;AT1G75040;AT1G78410;AT1G02450;AT1G07000;AT1G08560;AT1G13340;AT1G13470;AT1G15520;AT1G28480;AT1G29440;AT1G51890;AT1G73260;AT1G73805;AT1G79680;AT2G04450;AT2G13810;AT2G14560;AT2G15480;AT2G35980;AT2G41380;AT2G47190;AT2G14610;AT2G26400;AT2G26560;AT2G29460;AT2G29480;AT2G30770;AT2G32680;AT2G34500;AT2G40750;AT3G09020;AT3G12110;AT3G13610;AT3G13950…
37	GO:0006950	1.37e-18	1.6494	340.942	488	4028	response to stress	AT1G02580;AT1G03220;AT1G03230;AT1G05200;AT1G05880;AT1G06620;AT1G07410;AT1G08310;AT1G09665;AT1G13330;AT1G16130;AT1G17610;AT1G17615;AT1G23120;AT1G24150;AT1G27180;AT1G30900;AT1G31580;AT1G33600;AT1G34420;AT1G35530;AT1G35710;AT1G44414;AT1G49860;AT1G52400;AT1G52410;AT1G56540;AT1G57630;AT1G57850;AT1G58848;AT1G64230;AT1G65850;AT1G75390;AT1G70690;AT1G72870;AT1G72890;AT1G72930;AT1G75040;AT1G77080;AT1G78410…
38	GO:0060548	1.51e-18	5.15495	14.6433	55	173	negative regulation of cell death	AT1G75040;AT1G07000;AT1G15520;AT1G28480;AT1G51890;AT2G14560;AT2G35980;AT2G26560;AT3G13950;AT3G25780;AT3G22160;AT3G47480;AT3G48090;AT3G52400;AT3G56400;AT3G57260;AT4G13510;AT4G04490;AT4G14365;AT4G19700;AT4G25110;AT5G13490;AT5G26920;AT5G40780;AT5G52760;AT5G22570;AT5G54610;AT1G01560;AT1G21250;AT1G72900;AT1G74360;AT1G74710;AT1G08050;AT1G64610;AT1G69270;AT2G25000;AT3G02840;AT3G09830;AT3G20410;AT3G52430…
39	GO:0048585	3.46e-18	3.39664	30.8101	85	364	negative regulation of response to stimulus	AT1G17610;AT1G33600;AT1G34420;AT1G57630;AT1G75040;AT1G78410;AT1G02450;AT1G07000;AT1G13340;AT1G13470;AT1G15520;AT1G28480;AT1G73805;AT2G04450;AT2G14560;AT2G35980;AT2G14610;AT2G26560;AT2G30770;AT2G32680;AT2G40750;AT3G09020;AT3G13950;AT3G26830;AT3G47380;AT3G47480;AT3G48090;AT3G48640;AT3G52400;AT3G56400;AT3G56710;AT3G57240;AT3G57260;AT4G11890;AT4G26120;AT4G39030;AT4G04490;AT4G14365;AT4G23810;AT4G24580…
40	GO:0035556	4.23e-18	2.75397	49.8548	116	589	intracellular signal transduction	AT1G05200;AT1G07410;AT1G12340;AT1G17610;AT1G33600;AT1G35710;AT1G57630;AT1G61840;AT1G75040;AT1G78410;AT1G02440;AT1G02450;AT1G13470;AT1G15520;AT1G28480;AT1G32350;AT1G50190;AT1G73805;AT2G02680;AT2G04450;AT2G14560;AT2G15310;AT2G17040;AT2G21830;AT2G21850;AT2G35980;AT2G44690;AT2G14610;AT2G26560;AT2G30770;AT2G32030;AT2G32680;AT2G40750;AT3G09020;AT3G11920;AT3G13950;AT3G16020;AT3G25780;AT3G26830;AT3G47380…
41	GO:0012501	4.24e-18	3.08112	38.0047	97	449	programmed cell death	AT1G33600;AT1G57630;AT1G75040;AT1G78410;AT1G02450;AT1G07000;AT1G15520;AT1G16420;AT1G19250;AT1G28480;AT1G51890;AT1G73260;AT1G73805;AT2G04450;AT2G14560;AT2G35980;AT2G14610;AT2G26560;AT2G30770;AT2G32680;AT2G40750;AT3G09020;AT3G13610;AT3G13950;AT3G25780;AT3G26830;AT3G47380;AT3G08720;AT3G22160;AT3G47480;AT3G48090;AT3G52400;AT3G56400;AT3G57240;AT3G57260;AT4G13510;AT4G37990;AT4G39030;AT4G04490;AT4G14365…
42	GO:2000377	6.29e-18	4.59956	17.0133	59	201	regulation of reactive oxygen species metabolic process	AT1G17610;AT1G33600;AT1G49860;AT1G75040;AT1G78410;AT1G02450;AT1G13470;AT1G15520;AT1G28480;AT1G73805;AT2G04450;AT2G14560;AT2G35980;AT2G14610;AT2G26400;AT2G26560;AT2G30770;AT2G32680;AT2G40750;AT3G09020;AT3G13950;AT3G26830;AT3G28510;AT3G47380;AT3G47480;AT3G48090;AT3G48640;AT3G52400;AT3G56400;AT3G56710;AT3G57240;AT3G57260;AT4G11890;AT4G13510;AT4G39030;AT4G14365;AT4G23810;AT5G09290;AT5G11920;AT5G24530…
43	GO:0051716	8.18e-18	1.7067	262.732	393	3104	cellular response to stimulus	AT1G05200;AT1G05880;AT1G06620;AT1G07410;AT1G08310;AT1G09665;AT1G12010;AT1G12340;AT1G13330;AT1G15080;AT1G17250;AT1G17350;AT1G17610;AT1G17615;AT1G27180;AT1G30900;AT1G33600;AT1G34420;AT1G35530;AT1G35710;AT1G49860;AT1G51270;AT1G52400;AT1G56540;AT1G57630;AT1G57850;AT1G60983;AT1G61840;AT1G64230;AT1G65850;AT1G75390;AT1G72870;AT1G72890;AT1G72930;AT1G75040;AT1G78410;AT1G02440;AT1G02450;AT1G07000;AT1G13340…
44	GO:0010941	2.86e-17	3.1513	34.1958	89	404	regulation of cell death	AT1G33600;AT1G57630;AT1G75040;AT1G78410;AT1G02450;AT1G07000;AT1G15520;AT1G28480;AT1G51890;AT1G73805;AT2G04450;AT2G14560;AT2G35980;AT2G14610;AT2G26560;AT2G30770;AT2G32680;AT2G40750;AT3G09020;AT3G13950;AT3G25780;AT3G26830;AT3G47380;AT3G08720;AT3G22160;AT3G47480;AT3G48090;AT3G52400;AT3G56400;AT3G57240;AT3G57260;AT4G13510;AT4G39030;AT4G04490;AT4G14365;AT4G19700;AT4G23810;AT4G25110;AT5G13490;AT5G24530…
45	GO:0006612	2.89e-17	3.22729	32.4183	86	383	protein targeting to membrane	AT1G33600;AT1G57630;AT1G75040;AT1G78410;AT1G02450;AT1G07000;AT1G15520;AT1G28480;AT1G51890;AT1G67650;AT1G73805;AT2G04450;AT2G14560;AT2G35980;AT2G14610;AT2G26560;AT2G30770;AT2G32680;AT2G40750;AT3G09020;AT3G13950;AT3G25780;AT3G26830;AT3G47380;AT3G08720;AT3G22160;AT3G47480;AT3G48090;AT3G52400;AT3G56400;AT3G57240;AT3G57260;AT4G13510;AT4G39030;AT4G04490;AT4G14365;AT4G23810;AT5G13490;AT5G24530;AT5G26920…
46	GO:0010363	4e-17	3.26019	31.4026	84	371	regulation of plant-type hypersensitive response	AT1G33600;AT1G57630;AT1G75040;AT1G78410;AT1G02450;AT1G07000;AT1G15520;AT1G28480;AT1G51890;AT1G73805;AT2G04450;AT2G14560;AT2G35980;AT2G14610;AT2G26560;AT2G30770;AT2G32680;AT2G40750;AT3G09020;AT3G13950;AT3G25780;AT3G26830;AT3G47380;AT3G08720;AT3G22160;AT3G47480;AT3G48090;AT3G52400;AT3G56400;AT3G57240;AT3G57260;AT4G13510;AT4G39030;AT4G04490;AT4G14365;AT4G23810;AT5G13490;AT5G24530;AT5G26920;AT5G38710…
47	GO:0009626	4.73e-17	3.14465	33.8572	88	400	plant-type hypersensitive response	AT1G33600;AT1G57630;AT1G75040;AT1G78410;AT1G02450;AT1G07000;AT1G15520;AT1G19250;AT1G28480;AT1G51890;AT1G73805;AT2G04450;AT2G14560;AT2G35980;AT2G14610;AT2G26560;AT2G30770;AT2G32680;AT2G40750;AT3G09020;AT3G13950;AT3G25780;AT3G26830;AT3G47380;AT3G08720;AT3G22160;AT3G47480;AT3G48090;AT3G52400;AT3G56400;AT3G57240;AT3G57260;AT4G13510;AT4G37990;AT4G39030;AT4G04490;AT4G14365;AT4G23810;AT5G13490;AT5G24530…
48	GO:0034050	5.57e-17	3.13446	33.9419	88	401	host programmed cell death induced by symbiont	AT1G33600;AT1G57630;AT1G75040;AT1G78410;AT1G02450;AT1G07000;AT1G15520;AT1G19250;AT1G28480;AT1G51890;AT1G73805;AT2G04450;AT2G14560;AT2G35980;AT2G14610;AT2G26560;AT2G30770;AT2G32680;AT2G40750;AT3G09020;AT3G13950;AT3G25780;AT3G26830;AT3G47380;AT3G08720;AT3G22160;AT3G47480;AT3G48090;AT3G52400;AT3G56400;AT3G57240;AT3G57260;AT4G13510;AT4G37990;AT4G39030;AT4G04490;AT4G14365;AT4G23810;AT5G13490;AT5G24530…
49	GO:0080135	7.91e-17	3.18809	32.3337	85	382	regulation of cellular response to stress	AT1G33600;AT1G57630;AT1G75040;AT1G78410;AT1G02450;AT1G07000;AT1G15520;AT1G28480;AT1G51890;AT1G73805;AT2G04450;AT2G14560;AT2G35980;AT2G14610;AT2G26560;AT2G30770;AT2G32680;AT2G40750;AT3G09020;AT3G13950;AT3G25780;AT3G26830;AT3G47380;AT3G08720;AT3G22160;AT3G47480;AT3G48090;AT3G52400;AT3G56400;AT3G57240;AT3G57260;AT4G13510;AT4G39030;AT4G04490;AT4G14365;AT4G23810;AT5G13490;AT5G24530;AT5G26920;AT5G38710…
50	GO:0043067	9.18e-17	3.12763	33.6033	87	397	regulation of programmed cell death	AT1G33600;AT1G57630;AT1G75040;AT1G78410;AT1G02450;AT1G07000;AT1G15520;AT1G28480;AT1G51890;AT1G73805;AT2G04450;AT2G14560;AT2G35980;AT2G14610;AT2G26560;AT2G30770;AT2G32680;AT2G40750;AT3G09020;AT3G13950;AT3G25780;AT3G26830;AT3G47380;AT3G08720;AT3G22160;AT3G47480;AT3G48090;AT3G52400;AT3G56400;AT3G57240;AT3G57260;AT4G13510;AT4G39030;AT4G04490;AT4G14365;AT4G19700;AT4G23810;AT4G25110;AT5G13490;AT5G24530…
51	GO:0071407	1.91e-16	2.73821	45.1994	105	534	cellular response to organic cyclic compound	AT1G17610;AT1G33600;AT1G34420;AT1G49860;AT1G57630;AT1G75040;AT1G78410;AT1G02450;AT1G07000;AT1G13340;AT1G13470;AT1G15520;AT1G28480;AT1G51890;AT1G73805;AT2G04450;AT2G13810;AT2G14560;AT2G35980;AT2G14610;AT2G26400;AT2G26560;AT2G30770;AT2G32680;AT2G40750;AT3G09020;AT3G13950;AT3G25780;AT3G26830;AT3G28510;AT3G47380;AT3G01420;AT3G08720;AT3G22160;AT3G47480;AT3G48090;AT3G48640;AT3G52400;AT3G56400;AT3G56710…
52	GO:0008219	2.07e-16	2.81484	42.0676	100	497	cell death	AT1G33600;AT1G57630;AT1G75040;AT1G78410;AT1G02450;AT1G07000;AT1G15520;AT1G16420;AT1G19250;AT1G28480;AT1G51890;AT1G73260;AT1G73805;AT2G04450;AT2G14560;AT2G35980;AT2G14610;AT2G26560;AT2G30770;AT2G32680;AT2G40750;AT3G09020;AT3G13610;AT3G13950;AT3G25780;AT3G26830;AT3G47380;AT3G01420;AT3G08720;AT3G22160;AT3G47480;AT3G48090;AT3G52400;AT3G56400;AT3G57240;AT3G57260;AT4G13510;AT4G37990;AT4G39030;AT4G04490…
53	GO:0016265	2.07e-16	2.81484	42.0676	100	497	death	AT1G33600;AT1G57630;AT1G75040;AT1G78410;AT1G02450;AT1G07000;AT1G15520;AT1G16420;AT1G19250;AT1G28480;AT1G51890;AT1G73260;AT1G73805;AT2G04450;AT2G14560;AT2G35980;AT2G14610;AT2G26560;AT2G30770;AT2G32680;AT2G40750;AT3G09020;AT3G13610;AT3G13950;AT3G25780;AT3G26830;AT3G47380;AT3G01420;AT3G08720;AT3G22160;AT3G47480;AT3G48090;AT3G52400;AT3G56400;AT3G57240;AT3G57260;AT4G13510;AT4G37990;AT4G39030;AT4G04490…
54	GO:0034976	3.54e-16	3.25328	29.5404	79	349	response to endoplasmic reticulum stress	AT1G30900;AT1G75390;AT1G75040;AT1G07000;AT1G28480;AT1G60970;AT2G04450;AT2G46270;AT2G14610;AT2G18660;AT2G32680;AT2G39210;AT3G08720;AT3G25010;AT3G47480;AT3G48090;AT3G51890;AT3G52400;AT3G57240;AT3G57260;AT4G00700;AT4G23150;AT4G39030;AT4G04490;AT4G14365;AT4G18430;AT4G22530;AT4G35180;AT5G24530;AT5G40780;AT5G42010;AT5G52740;AT5G10760;AT5G22570;AT5G42380;AT1G01560;AT1G07390;AT1G16670;AT1G74360;AT1G74710…
55	GO:0033554	9.62e-15	1.9086	122.563	208	1448	cellular response to stress	AT1G05200;AT1G05880;AT1G08310;AT1G13330;AT1G30900;AT1G33600;AT1G35530;AT1G57630;AT1G64230;AT1G75390;AT1G75040;AT1G78410;AT1G02450;AT1G07000;AT1G15520;AT1G16420;AT1G19250;AT1G26380;AT1G28480;AT1G51890;AT1G53620;AT1G60970;AT1G66280;AT1G67600;AT1G69930;AT1G73805;AT1G77330;AT2G04032;AT2G04450;AT2G14560;AT2G23270;AT2G26820;AT2G28160;AT2G35980;AT2G46270;AT2G47190;AT2G14610;AT2G18660;AT2G26560;AT2G28960…
56	GO:0048583	1.12e-14	2.30552	63.567	128	751	regulation of response to stimulus	AT1G09665;AT1G17610;AT1G33600;AT1G34420;AT1G52400;AT1G57630;AT1G75040;AT1G78410;AT1G02450;AT1G07000;AT1G13340;AT1G13470;AT1G13750;AT1G15520;AT1G19250;AT1G28480;AT1G51890;AT1G73805;AT2G04450;AT2G14560;AT2G35980;AT2G14610;AT2G26560;AT2G30770;AT2G32680;AT2G40750;AT3G01080;AT3G09020;AT3G13950;AT3G16360;AT3G25780;AT3G26830;AT3G47380;AT3G08720;AT3G22160;AT3G47480;AT3G48090;AT3G48640;AT3G52400;AT3G56400…
57	GO:1901698	1.22e-14	2.26995	66.4448	132	785	response to nitrogen compound	AT1G05200;AT1G16130;AT1G22500;AT1G67330;AT1G75040;AT1G78410;AT1G02360;AT1G02450;AT1G03850;AT1G07000;AT1G15520;AT1G51790;AT1G67330;AT1G73260;AT1G73805;AT1G77330;AT2G04450;AT2G14560;AT2G17040;AT2G26820;AT2G28160;AT2G35980;AT2G43820;AT2G14610;AT2G25460;AT2G26560;AT2G27660;AT2G28960;AT2G30770;AT2G32030;AT2G33580;AT2G40750;AT2G43620;AT2G44380;AT2G46400;AT3G09010;AT3G09020;AT3G16460;AT3G26830;AT3G47380…
58	GO:0051606	1.25e-14	4.81052	12.5272	45	148	detection of stimulus	AT1G32960;AT1G75040;AT1G78410;AT1G02450;AT1G10340;AT1G15520;AT1G73805;AT2G04450;AT2G14560;AT2G14610;AT2G26560;AT2G30770;AT2G40750;AT3G09010;AT3G09020;AT3G26830;AT3G47380;AT3G47480;AT3G48090;AT3G52400;AT3G56400;AT3G57240;AT3G57260;AT4G11890;AT4G14640;AT4G39030;AT4G14365;AT4G23810;AT4G26560;AT5G24530;AT5G26920;AT5G52760;AT5G55450;AT5G22570;AT1G01560;AT1G74360;AT1G74710;AT2G25000;AT2G35650;AT3G52430…
59	GO:0009867	3.66e-14	3.32096	24.2079	66	286	jasmonic acid mediated signaling pathway	AT1G06620;AT1G33600;AT1G57630;AT1G75040;AT1G78410;AT1G02450;AT1G15520;AT1G28480;AT1G73805;AT2G04450;AT2G14560;AT2G35980;AT2G14610;AT2G26560;AT2G30770;AT2G32680;AT2G40750;AT3G09020;AT3G26830;AT3G47380;AT3G08720;AT3G47480;AT3G48090;AT3G52400;AT3G56400;AT3G57240;AT3G57260;AT4G39030;AT4G04490;AT4G14365;AT4G23810;AT5G24530;AT5G26920;AT5G38710;AT5G52760;AT5G55450;AT5G64810;AT5G22570;AT5G26170;AT5G54610…
60	GO:0071395	3.66e-14	3.32096	24.2079	66	286	cellular response to jasmonic acid stimulus	AT1G06620;AT1G33600;AT1G57630;AT1G75040;AT1G78410;AT1G02450;AT1G15520;AT1G28480;AT1G73805;AT2G04450;AT2G14560;AT2G35980;AT2G14610;AT2G26560;AT2G30770;AT2G32680;AT2G40750;AT3G09020;AT3G26830;AT3G47380;AT3G08720;AT3G47480;AT3G48090;AT3G52400;AT3G56400;AT3G57240;AT3G57260;AT4G39030;AT4G04490;AT4G14365;AT4G23810;AT5G24530;AT5G26920;AT5G38710;AT5G52760;AT5G55450;AT5G64810;AT5G22570;AT5G26170;AT5G54610…
61	GO:0009617	5.81e-14	2.48023	48.4158	104	572	response to bacterium	AT1G17610;AT1G31580;AT1G33600;AT1G57630;AT1G70690;AT1G75040;AT1G78410;AT1G02450;AT1G10340;AT1G13470;AT1G15520;AT1G19250;AT1G28480;AT1G51890;AT1G54040;AT1G73260;AT1G73805;AT1G79680;AT2G04450;AT2G13810;AT2G14560;AT2G26820;AT2G35980;AT2G14610;AT2G26560;AT2G30770;AT2G32680;AT2G40750;AT2G47130;AT3G09010;AT3G09020;AT3G13950;AT3G23010;AT3G26830;AT3G44670;AT3G47380;AT3G01420;AT3G47480;AT3G48090;AT3G48640…
62	GO:1901701	2.35e-13	2.07732	79.2259	146	936	cellular response to oxygen-containing compound	AT1G05200;AT1G06620;AT1G12010;AT1G15080;AT1G17610;AT1G33600;AT1G34420;AT1G49860;AT1G52400;AT1G57630;AT1G75040;AT1G78410;AT1G02450;AT1G07000;AT1G13340;AT1G13470;AT1G15520;AT1G16420;AT1G28480;AT1G32350;AT1G51890;AT1G69930;AT1G73805;AT2G04450;AT2G13810;AT2G14560;AT2G28160;AT2G34780;AT2G35980;AT2G46270;AT2G47190;AT2G02850;AT2G14610;AT2G26400;AT2G26560;AT2G30770;AT2G32030;AT2G32680;AT2G33580;AT2G34500…
63	GO:0072330	4.45e-13	2.31245	54.7641	111	647	monocarboxylic acid biosynthetic process	AT1G17610;AT1G24150;AT1G30900;AT1G31580;AT1G34420;AT1G57630;AT1G75040;AT1G78410;AT1G02450;AT1G07000;AT1G10340;AT1G13340;AT1G13470;AT1G13750;AT1G15520;AT1G28480;AT1G57750;AT1G73805;AT2G04450;AT2G05380;AT2G14560;AT2G34940;AT2G14060;AT2G14610;AT2G26560;AT2G30770;AT2G40750;AT2G41470;AT2G45760;AT2G46400;AT2G48150;AT3G09020;AT3G13950;AT3G25780;AT3G26830;AT3G47380;AT3G19260;AT3G47480;AT3G48080;AT3G48090…
64	GO:0042742	1.91e-12	2.71813	33.0954	77	391	defense response to bacterium	AT1G17610;AT1G31580;AT1G70690;AT1G75040;AT1G78410;AT1G02450;AT1G13470;AT1G15520;AT1G19250;AT1G28480;AT1G51890;AT1G54040;AT1G73260;AT1G73805;AT2G04450;AT2G13810;AT2G14560;AT2G35980;AT2G14610;AT2G26560;AT2G30770;AT2G40750;AT2G47130;AT3G09020;AT3G13950;AT3G26830;AT3G44670;AT3G47380;AT3G01420;AT3G47480;AT3G48090;AT3G48640;AT3G52400;AT3G56400;AT3G56710;AT3G57240;AT3G57260;AT4G11890;AT4G39030;AT4G11850…
65	GO:0050896	4.02e-12	1.40882	569.987	705	6734	response to stimulus	AT1G02580;AT1G03220;AT1G03230;AT1G05200;AT1G05880;AT1G06620;AT1G07410;AT1G08310;AT1G08430;AT1G09665;AT1G12010;AT1G12340;AT1G13330;AT1G13430;AT1G15080;AT1G16130;AT1G16150;AT1G17020;AT1G17250;AT1G17350;AT1G17610;AT1G17615;AT1G18860;AT1G22500;AT1G23120;AT1G24150;AT1G24530;AT1G27180;AT1G30530;AT1G30900;AT1G31580;AT1G32960;AT1G33600;AT1G34420;AT1G35530;AT1G35710;AT1G44414;AT1G49860;AT1G51270;AT1G52400…
66	GO:0009753	6.11e-11	2.38757	40.1208	84	474	response to jasmonic acid stimulus	AT1G06620;AT1G33600;AT1G57630;AT1G75040;AT1G78410;AT1G02450;AT1G15520;AT1G28480;AT1G54040;AT1G73805;AT2G04450;AT2G14560;AT2G35980;AT2G39030;AT2G46270;AT2G47190;AT2G14610;AT2G26560;AT2G30770;AT2G32680;AT2G40750;AT3G09020;AT3G25780;AT3G26830;AT3G47380;AT3G08720;AT3G47480;AT3G48090;AT3G52400;AT3G56400;AT3G57240;AT3G57260;AT4G39030;AT4G04490;AT4G14365;AT4G23810;AT5G24530;AT5G26920;AT5G38710;AT5G52760…
67	GO:0070887	1.17e-10	1.74215	118.162	187	1396	cellular response to chemical stimulus	AT1G05200;AT1G05880;AT1G06620;AT1G12010;AT1G15080;AT1G17350;AT1G17610;AT1G33600;AT1G34420;AT1G49860;AT1G52400;AT1G57630;AT1G75390;AT1G75040;AT1G78410;AT1G02450;AT1G07000;AT1G13340;AT1G13470;AT1G15520;AT1G16420;AT1G19250;AT1G26380;AT1G27940;AT1G28480;AT1G32350;AT1G51890;AT1G53620;AT1G69930;AT1G73805;AT2G04450;AT2G13810;AT2G14560;AT2G23270;AT2G26020;AT2G28160;AT2G34780;AT2G35980;AT2G40670;AT2G46270…
68	GO:0002679	2.27e-10	4.28214	10.2418	34	121	respiratory burst involved in defense response	AT1G75040;AT1G02360;AT1G51790;AT2G35980;AT2G26560;AT2G27660;AT2G32030;AT2G43620;AT3G09020;AT3G13790;AT3G47480;AT3G48090;AT3G52400;AT3G56400;AT3G57260;AT4G20860;AT4G26120;AT4G14365;AT4G21400;AT4G22530;AT1G74360;AT1G74710;AT1G62300;AT3G52430;AT3G11820;AT3G11840;AT3G63380;AT4G20830;AT4G26070;AT4G39670;AT4G18880;AT5G05190;AT5G25930;AT5G47220
69	GO:0045730	2.27e-10	4.28214	10.2418	34	121	respiratory burst	AT1G75040;AT1G02360;AT1G51790;AT2G35980;AT2G26560;AT2G27660;AT2G32030;AT2G43620;AT3G09020;AT3G13790;AT3G47480;AT3G48090;AT3G52400;AT3G56400;AT3G57260;AT4G20860;AT4G26120;AT4G14365;AT4G21400;AT4G22530;AT1G74360;AT1G74710;AT1G62300;AT3G52430;AT3G11820;AT3G11840;AT3G63380;AT4G20830;AT4G26070;AT4G39670;AT4G18880;AT5G05190;AT5G25930;AT5G47220
70	GO:0042743	1.21e-09	2.56332	28.2708	63	334	hydrogen peroxide metabolic process	AT1G17610;AT1G33600;AT1G49860;AT1G75040;AT1G78410;AT1G02450;AT1G13470;AT1G15520;AT1G28480;AT1G73805;AT2G04450;AT2G14560;AT2G35980;AT2G38180;AT2G14610;AT2G26400;AT2G26560;AT2G30770;AT2G32680;AT2G40750;AT3G09020;AT3G13950;AT3G26830;AT3G28510;AT3G47380;AT3G47480;AT3G48090;AT3G48640;AT3G52400;AT3G56400;AT3G56710;AT3G57240;AT3G57260;AT4G02430;AT4G11890;AT4G13510;AT4G39030;AT4G14365;AT4G23810;AT5G09290…
71	GO:0043900	1.46e-09	3.92008	10.919	34	129	regulation of multi-organism process	AT1G75040;AT1G78410;AT1G02450;AT1G15520;AT1G73805;AT2G04450;AT2G14560;AT2G14610;AT2G26560;AT2G30770;AT2G40750;AT3G09020;AT3G26830;AT3G47380;AT3G48090;AT3G52400;AT3G56400;AT3G57240;AT3G57260;AT4G39030;AT4G23810;AT5G24530;AT5G26920;AT5G52760;AT5G55450;AT5G22570;AT1G74710;AT2G25000;AT2G35650;AT3G52430;AT3G11820;AT3G11840;AT4G26070;AT4G29810
72	GO:1901700	1.48e-09	1.52733	201.535	282	2381	response to oxygen-containing compound	AT1G05200;AT1G06620;AT1G07410;AT1G12010;AT1G15080;AT1G16130;AT1G17020;AT1G17610;AT1G22500;AT1G24530;AT1G30900;AT1G33600;AT1G34420;AT1G44414;AT1G49860;AT1G52400;AT1G57630;AT1G61800;AT1G67330;AT1G75040;AT1G78410;AT1G02360;AT1G02450;AT1G03850;AT1G07000;AT1G13340;AT1G13470;AT1G15520;AT1G16420;AT1G28480;AT1G29440;AT1G32350;AT1G51790;AT1G51890;AT1G54040;AT1G54050;AT1G60970;AT1G67330;AT1G69930;AT1G73260…
73	GO:0010033	1.84e-09	1.49093	231.414	316	2734	response to organic substance	AT1G05200;AT1G06620;AT1G12010;AT1G13430;AT1G15080;AT1G16130;AT1G17020;AT1G17350;AT1G17610;AT1G22500;AT1G24530;AT1G30900;AT1G33600;AT1G34420;AT1G49860;AT1G52400;AT1G57630;AT1G61800;AT1G64230;AT1G75390;AT1G75040;AT1G78410;AT1G02360;AT1G02450;AT1G03850;AT1G07000;AT1G08560;AT1G10340;AT1G13340;AT1G13470;AT1G15520;AT1G26380;AT1G27940;AT1G28480;AT1G29440;AT1G29460;AT1G32350;AT1G51790;AT1G51890;AT1G54040…
74	GO:0006865	2.14e-09	2.7509	22.8536	54	270	amino acid transport	AT1G53920;AT1G57630;AT1G65730;AT1G02360;AT1G51790;AT1G51850;AT1G65520;AT2G24762;AT2G27660;AT2G33260;AT2G39210;AT2G43620;AT3G47380;AT3G50770;AT3G04070;AT3G13790;AT3G52400;AT3G53150;AT4G13510;AT4G20860;AT4G37990;AT4G35180;AT4G35480;AT5G13490;AT5G24920;AT5G39090;AT5G40780;AT5G47330;AT5G48400;AT5G53110;AT5G11210;AT5G26340;AT5G44390;AT5G49630;AT1G01010;AT1G79450;AT1G62300;AT1G65690;AT1G79900;AT3G04010…
75	GO:0071310	2.48e-09	1.72921	102.503	162	1211	cellular response to organic substance	AT1G05200;AT1G06620;AT1G12010;AT1G15080;AT1G17350;AT1G17610;AT1G33600;AT1G34420;AT1G49860;AT1G52400;AT1G57630;AT1G75390;AT1G75040;AT1G78410;AT1G02450;AT1G07000;AT1G13340;AT1G13470;AT1G15520;AT1G27940;AT1G28480;AT1G32350;AT1G51890;AT1G73805;AT2G04450;AT2G13810;AT2G14560;AT2G26020;AT2G28160;AT2G34780;AT2G35980;AT2G40670;AT2G46270;AT2G47190;AT2G02850;AT2G14610;AT2G26400;AT2G26560;AT2G30770;AT2G32030…
76	GO:0015849	2.94e-09	2.63667	24.9697	57	295	organic acid transport	AT1G53920;AT1G57630;AT1G61800;AT1G65730;AT1G02360;AT1G15520;AT1G51790;AT1G51850;AT1G65520;AT2G24762;AT2G27660;AT2G33260;AT2G39210;AT2G43620;AT3G47380;AT3G50770;AT3G04070;AT3G13790;AT3G52400;AT3G53150;AT4G13510;AT4G20860;AT4G37990;AT4G35180;AT4G35480;AT5G13490;AT5G24920;AT5G39090;AT5G40780;AT5G47330;AT5G48400;AT5G53110;AT5G11210;AT5G26340;AT5G44390;AT5G49630;AT1G01010;AT1G79450;AT1G62300;AT1G65690…
77	GO:0046942	2.94e-09	2.63667	24.9697	57	295	carboxylic acid transport	AT1G53920;AT1G57630;AT1G61800;AT1G65730;AT1G02360;AT1G15520;AT1G51790;AT1G51850;AT1G65520;AT2G24762;AT2G27660;AT2G33260;AT2G39210;AT2G43620;AT3G47380;AT3G50770;AT3G04070;AT3G13790;AT3G52400;AT3G53150;AT4G13510;AT4G20860;AT4G37990;AT4G35180;AT4G35480;AT5G13490;AT5G24920;AT5G39090;AT5G40780;AT5G47330;AT5G48400;AT5G53110;AT5G11210;AT5G26340;AT5G44390;AT5G49630;AT1G01010;AT1G79450;AT1G62300;AT1G65690…
78	GO:0009719	4.15e-09	1.58272	153.373	223	1812	response to endogenous stimulus	AT1G05200;AT1G06620;AT1G13430;AT1G15080;AT1G16130;AT1G17020;AT1G17350;AT1G24530;AT1G33600;AT1G52400;AT1G57630;AT1G75040;AT1G78410;AT1G02360;AT1G02450;AT1G03850;AT1G07000;AT1G15520;AT1G26380;AT1G27940;AT1G28480;AT1G29440;AT1G29460;AT1G32350;AT1G51790;AT1G54040;AT1G73805;AT1G79680;AT2G04450;AT2G14560;AT2G15480;AT2G17040;AT2G21220;AT2G23120;AT2G23270;AT2G26020;AT2G28160;AT2G28210;AT2G35980;AT2G39030…
79	GO:0036293	4.47e-09	4.28573	8.71824	29	103	response to decreased oxygen levels	AT1G05880;AT1G49860;AT1G57630;AT1G02450;AT1G19250;AT1G26380;AT1G53620;AT1G73805;AT2G23270;AT2G26400;AT2G26560;AT3G05550;AT3G28510;AT3G62410;AT3G48090;AT3G56400;AT4G13510;AT5G09290;AT5G11920;AT5G24530;AT5G26920;AT5G54960;AT1G75420;AT1G04920;AT3G52430;AT5G11110;AT5G26860;AT5G37180;AT5G57510
80	GO:0070482	4.47e-09	4.28573	8.71824	29	103	response to oxygen levels	AT1G05880;AT1G49860;AT1G57630;AT1G02450;AT1G19250;AT1G26380;AT1G53620;AT1G73805;AT2G23270;AT2G26400;AT2G26560;AT3G05550;AT3G28510;AT3G62410;AT3G48090;AT3G56400;AT4G13510;AT5G09290;AT5G11920;AT5G24530;AT5G26920;AT5G54960;AT1G75420;AT1G04920;AT3G52430;AT5G11110;AT5G26860;AT5G37180;AT5G57510
81	GO:0015711	6.54e-09	2.54374	26.1547	58	309	organic anion transport	AT1G53920;AT1G57630;AT1G61800;AT1G65730;AT1G02360;AT1G15520;AT1G51790;AT1G51850;AT1G65520;AT2G24762;AT2G27660;AT2G33260;AT2G39210;AT2G43620;AT3G47380;AT3G50770;AT3G04070;AT3G13790;AT3G52400;AT3G53150;AT4G13510;AT4G20860;AT4G37990;AT4G35180;AT4G35480;AT5G13490;AT5G24920;AT5G39090;AT5G40780;AT5G47330;AT5G48400;AT5G53110;AT5G11210;AT5G26340;AT5G44390;AT5G49630;AT1G01010;AT1G79450;AT1G62300;AT1G65690…
82	GO:0001666	9.41e-09	4.25113	8.46431	28	100	response to hypoxia	AT1G05880;AT1G49860;AT1G57630;AT1G02450;AT1G19250;AT1G26380;AT1G53620;AT1G73805;AT2G23270;AT2G26400;AT2G26560;AT3G05550;AT3G28510;AT3G48090;AT3G56400;AT4G13510;AT5G09290;AT5G11920;AT5G24530;AT5G26920;AT5G54960;AT1G75420;AT1G04920;AT3G52430;AT5G11110;AT5G26860;AT5G37180;AT5G57510
83	GO:0030968	1.96e-08	3.06635	15.4897	40	183	endoplasmic reticulum unfolded protein response	AT1G75390;AT1G07000;AT1G28480;AT2G46270;AT3G08720;AT3G51890;AT3G52400;AT4G04490;AT4G14365;AT4G22530;AT4G35180;AT5G40780;AT5G42010;AT5G42380;AT1G01560;AT1G16670;AT1G74360;AT1G75390;AT1G08050;AT1G24140;AT1G64610;AT1G69270;AT2G41070;AT3G02840;AT3G20410;AT3G52430;AT3G63010;AT3G11820;AT3G49370;AT3G63380;AT4G20830;AT4G36990;AT4G39670;AT4G39890;AT4G29810;AT5G06960;AT5G14930;AT5G67340;AT5G02490;AT5G13190…
84	GO:0072593	2.17e-08	2.32671	31.064	64	367	reactive oxygen species metabolic process	AT1G17610;AT1G33600;AT1G49860;AT1G75040;AT1G78410;AT1G02450;AT1G13470;AT1G15520;AT1G28480;AT1G73805;AT2G04450;AT2G14560;AT2G35980;AT2G38180;AT2G14610;AT2G26400;AT2G26560;AT2G30770;AT2G32680;AT2G40750;AT3G09020;AT3G13950;AT3G26830;AT3G28510;AT3G47380;AT3G47480;AT3G48090;AT3G48640;AT3G52400;AT3G56400;AT3G56710;AT3G57240;AT3G57260;AT4G02430;AT4G11890;AT4G13510;AT4G39030;AT4G14365;AT4G23810;AT5G09290…
85	GO:0006984	2.26e-08	2.99689	16.1668	41	191	ER-nucleus signaling pathway	AT1G75390;AT1G07000;AT1G28480;AT2G46270;AT3G08720;AT3G51890;AT3G52400;AT4G04490;AT4G14365;AT4G22530;AT4G35180;AT5G40780;AT5G42010;AT5G42380;AT1G01560;AT1G16670;AT1G74360;AT1G75390;AT1G08050;AT1G24140;AT1G64610;AT1G69270;AT1G72280;AT2G41070;AT3G02840;AT3G20410;AT3G52430;AT3G63010;AT3G11820;AT3G49370;AT3G63380;AT4G20830;AT4G36990;AT4G39670;AT4G39890;AT4G29810;AT5G06960;AT5G14930;AT5G67340;AT5G02490…
86	GO:0006986	2.7e-08	3.02378	15.659	40	185	response to unfolded protein	AT1G75390;AT1G07000;AT1G28480;AT2G46270;AT3G08720;AT3G51890;AT3G52400;AT4G04490;AT4G14365;AT4G22530;AT4G35180;AT5G40780;AT5G42010;AT5G42380;AT1G01560;AT1G16670;AT1G74360;AT1G75390;AT1G08050;AT1G24140;AT1G64610;AT1G69270;AT2G41070;AT3G02840;AT3G20410;AT3G52430;AT3G63010;AT3G11820;AT3G49370;AT3G63380;AT4G20830;AT4G36990;AT4G39670;AT4G39890;AT4G29810;AT5G06960;AT5G14930;AT5G67340;AT5G02490;AT5G13190…
87	GO:0034620	2.7e-08	3.02378	15.659	40	185	cellular response to unfolded protein	AT1G75390;AT1G07000;AT1G28480;AT2G46270;AT3G08720;AT3G51890;AT3G52400;AT4G04490;AT4G14365;AT4G22530;AT4G35180;AT5G40780;AT5G42010;AT5G42380;AT1G01560;AT1G16670;AT1G74360;AT1G75390;AT1G08050;AT1G24140;AT1G64610;AT1G69270;AT2G41070;AT3G02840;AT3G20410;AT3G52430;AT3G63010;AT3G11820;AT3G49370;AT3G63380;AT4G20830;AT4G36990;AT4G39670;AT4G39890;AT4G29810;AT5G06960;AT5G14930;AT5G67340;AT5G02490;AT5G13190…
88	GO:0035967	2.7e-08	3.02378	15.659	40	185	cellular response to topologically incorrect protein	AT1G75390;AT1G07000;AT1G28480;AT2G46270;AT3G08720;AT3G51890;AT3G52400;AT4G04490;AT4G14365;AT4G22530;AT4G35180;AT5G40780;AT5G42010;AT5G42380;AT1G01560;AT1G16670;AT1G74360;AT1G75390;AT1G08050;AT1G24140;AT1G64610;AT1G69270;AT2G41070;AT3G02840;AT3G20410;AT3G52430;AT3G63010;AT3G11820;AT3G49370;AT3G63380;AT4G20830;AT4G36990;AT4G39670;AT4G39890;AT4G29810;AT5G06960;AT5G14930;AT5G67340;AT5G02490;AT5G13190…
89	GO:0006820	7.29e-08	1.93891	51.6323	91	610	anion transport	AT1G22500;AT1G49860;AT1G50400;AT1G53920;AT1G57630;AT1G61800;AT1G65730;AT1G67330;AT1G74810;AT1G02360;AT1G03850;AT1G15520;AT1G51790;AT1G51850;AT1G65520;AT1G67330;AT1G69810;AT1G73260;AT1G77330;AT2G24762;AT2G26820;AT2G43820;AT2G27660;AT2G28960;AT2G33260;AT2G39210;AT2G43620;AT2G44380;AT3G16460;AT3G47380;AT3G50770;AT3G59220;AT3G01420;AT3G04070;AT3G09220;AT3G13790;AT3G22600;AT3G46980;AT3G47040;AT3G52400…
90	GO:0048519	2.5e-07	1.61692	101.487	152	1199	negative regulation of biological process	AT1G02580;AT1G05420;AT1G08310;AT1G17610;AT1G32310;AT1G33600;AT1G34420;AT1G35530;AT1G57630;AT1G75040;AT1G77080;AT1G78410;AT1G79840;AT1G02450;AT1G04050;AT1G07000;AT1G13340;AT1G13470;AT1G15520;AT1G28480;AT1G51890;AT1G67600;AT1G69120;AT1G73805;AT2G04450;AT2G14560;AT2G34780;AT2G35980;AT2G14610;AT2G26560;AT2G30770;AT2G32680;AT2G40750;AT3G09020;AT3G13950;AT3G15170;AT3G25780;AT3G26830;AT3G47380;AT3G62410…
91	GO:0010260	4.12e-07	3.73779	8.29502	25	98	organ senescence	AT1G17020;AT1G54040;AT2G13810;AT2G35980;AT2G47190;AT2G40750;AT3G11340;AT3G29035;AT3G04070;AT3G10320;AT3G56400;AT4G23700;AT4G23810;AT5G62165;AT1G20780;AT1G73680;AT2G38860;AT2G43000;AT3G51430;AT3G52430;AT5G13330;AT5G45900;AT5G58350;AT5G25770;AT5G55560
92	GO:0042221	5.43e-07	1.34569	318.173	397	3759	response to chemical stimulus	AT1G05200;AT1G05880;AT1G06620;AT1G07410;AT1G08430;AT1G12010;AT1G13430;AT1G15080;AT1G16130;AT1G16150;AT1G17020;AT1G17350;AT1G17610;AT1G18860;AT1G22500;AT1G24530;AT1G30900;AT1G33600;AT1G34420;AT1G44414;AT1G49860;AT1G52400;AT1G57630;AT1G61800;AT1G64230;AT1G67330;AT1G75390;AT1G71140;AT1G75040;AT1G78410;AT1G02360;AT1G02450;AT1G03850;AT1G07000;AT1G08560;AT1G10340;AT1G13340;AT1G13470;AT1G15520;AT1G16420…
93	GO:0002237	7.62e-07	3.58974	8.54895	25	101	response to molecule of bacterial origin	AT1G57630;AT1G10340;AT1G73805;AT2G26560;AT3G09010;AT3G13950;AT3G23010;AT3G47480;AT4G11890;AT4G14365;AT4G25110;AT5G25910;AT5G26920;AT5G52760;AT1G47890;AT1G71400;AT2G25000;AT3G26210;AT4G26070;AT4G28490;AT4G03450;AT4G23220;AT5G05190;AT5G61010;AT5G62230
94	GO:0071705	3.87e-06	1.67146	67.6298	105	799	nitrogen compound transport	AT1G22500;AT1G24530;AT1G30840;AT1G53920;AT1G57630;AT1G65730;AT1G67330;AT1G72120;AT1G02360;AT1G03850;AT1G22550;AT1G31820;AT1G51790;AT1G51850;AT1G65520;AT1G67330;AT1G73260;AT1G77330;AT1G78740;AT2G03590;AT2G24762;AT2G26820;AT2G29370;AT2G34780;AT2G43820;AT2G27660;AT2G28960;AT2G33260;AT2G39210;AT2G43620;AT2G44380;AT3G16460;AT3G47380;AT3G50770;AT3G59220;AT3G01420;AT3G04070;AT3G09220;AT3G13790;AT3G22600…	AT1G22500;AT1G24530;PUP4;GLIP5;AT1G57630;YSL7;AT1G67330;AT1G72120;AT1G02360;AT1G03850;AT1G22550;AT1G31820;AT1G51790;AT1G51850;ECI1;AT1G67330;KTI1;AT1G77330;AT1G78740;UPS1;GDU4;PP2-A3;AT2G29370;MEE22;UGT74F2;AT2G27660;AT2G28960;AT2G33260;AT2G39210;AT2G43620;AT2G44380;AT3G16460;AT3G47380;CML41;PRN;DOX1;NAC047;LAC7;ATBFRUCT1;AT3G22600;PHT4;3;AT3G47040;AT3G49480;SYP122;UGT73D1;PME1;AMT1;1;AT4G20860;E…
95	GO:0009692	4.1e-06	3.11736	9.90324	26	117	ethylene metabolic process	AT1G12010;AT1G28480;AT1G35210;AT1G77330;AT2G13810;AT2G32030;AT2G45760;AT3G22160;AT4G11370;AT4G19370;AT4G35480;AT4G37290;AT5G05300;AT5G42380;AT1G20350;AT1G72900;AT1G73740;AT1G24140;AT1G25370;AT2G31945;AT3G02840;AT3G09830;AT3G11840;AT4G01010;AT5G54490;AT5G47220
96	GO:0009693	4.1e-06	3.11736	9.90324	26	117	ethylene biosynthetic process	AT1G12010;AT1G28480;AT1G35210;AT1G77330;AT2G13810;AT2G32030;AT2G45760;AT3G22160;AT4G11370;AT4G19370;AT4G35480;AT4G37290;AT5G05300;AT5G42380;AT1G20350;AT1G72900;AT1G73740;AT1G24140;AT1G25370;AT2G31945;AT3G02840;AT3G09830;AT3G11840;AT4G01010;AT5G54490;AT5G47220
97	GO:0043449	4.1e-06	3.11736	9.90324	26	117	cellular alkene metabolic process	AT1G12010;AT1G28480;AT1G35210;AT1G77330;AT2G13810;AT2G32030;AT2G45760;AT3G22160;AT4G11370;AT4G19370;AT4G35480;AT4G37290;AT5G05300;AT5G42380;AT1G20350;AT1G72900;AT1G73740;AT1G24140;AT1G25370;AT2G31945;AT3G02840;AT3G09830;AT3G11840;AT4G01010;AT5G54490;AT5G47220
98	GO:0043450	4.1e-06	3.11736	9.90324	26	117	alkene biosynthetic process	AT1G12010;AT1G28480;AT1G35210;AT1G77330;AT2G13810;AT2G32030;AT2G45760;AT3G22160;AT4G11370;AT4G19370;AT4G35480;AT4G37290;AT5G05300;AT5G42380;AT1G20350;AT1G72900;AT1G73740;AT1G24140;AT1G25370;AT2G31945;AT3G02840;AT3G09830;AT3G11840;AT4G01010;AT5G54490;AT5G47220
99	GO:1900673	4.1e-06	3.11736	9.90324	26	117	olefin metabolic process	AT1G12010;AT1G28480;AT1G35210;AT1G77330;AT2G13810;AT2G32030;AT2G45760;AT3G22160;AT4G11370;AT4G19370;AT4G35480;AT4G37290;AT5G05300;AT5G42380;AT1G20350;AT1G72900;AT1G73740;AT1G24140;AT1G25370;AT2G31945;AT3G02840;AT3G09830;AT3G11840;AT4G01010;AT5G54490;AT5G47220
100	GO:1900674	4.1e-06	3.11736	9.90324	26	117	olefin biosynthetic process	AT1G12010;AT1G28480;AT1G35210;AT1G77330;AT2G13810;AT2G32030;AT2G45760;AT3G22160;AT4G11370;AT4G19370;AT4G35480;AT4G37290;AT5G05300;AT5G42380;AT1G20350;AT1G72900;AT1G73740;AT1G24140;AT1G25370;AT2G31945;AT3G02840;AT3G09830;AT3G11840;AT4G01010;AT5G54490;AT5G47220
101	GO:0009755	4.55e-06	1.6819	64.6673	101	764	hormone-mediated signaling pathway	AT1G06620;AT1G15080;AT1G17350;AT1G33600;AT1G52400;AT1G57630;AT1G75040;AT1G78410;AT1G02450;AT1G15520;AT1G27940;AT1G28480;AT1G32350;AT1G73805;AT2G04450;AT2G14560;AT2G26020;AT2G35980;AT2G40670;AT2G46270;AT2G47190;AT2G14610;AT2G26560;AT2G30770;AT2G32030;AT2G32680;AT2G40750;AT3G09020;AT3G16360;AT3G25780;AT3G26200;AT3G26830;AT3G47380;AT3G59220;AT3G08720;AT3G29410;AT3G47480;AT3G48090;AT3G52400;AT3G56400…
102	GO:0006468	5.09e-06	1.5303	102.672	147	1213	protein phosphorylation	AT1G16130;AT1G16150;AT1G16160;AT1G21245;AT1G33770;AT1G34420;AT1G35710;AT1G65250;AT1G20590;AT1G20610;AT1G23700;AT1G27190;AT1G51790;AT1G51850;AT1G51890;AT1G56120;AT1G61440;AT1G61490;AT1G61500;AT1G67000;AT1G67520;AT1G79680;AT2G13800;AT2G19230;AT2G28960;AT3G09010;AT3G20200;AT3G46370;AT3G57740;AT3G05140;AT3G06630;AT3G08720;AT3G10660;AT3G17680;AT3G45420;AT3G45430;AT3G52530;AT4G00960;AT4G02800;AT4G11890…
103	GO:0010583	5.71e-06	2.77607	12.5272	30	148	response to cyclopentenone	AT1G49860;AT1G08560;AT2G15480;AT2G41380;AT2G29460;AT2G29480;AT2G34500;AT3G12110;AT3G13610;AT4G20860;AT4G37990;AT4G01870;AT4G23700;AT5G38710;AT5G16980;AT5G62480;AT1G68620;AT1G62300;AT1G74590;AT2G30140;AT2G31945;AT3G43800;AT3G44190;AT3G47730;AT4G21120;AT4G27260;AT4G36990;AT5G13330;AT5G54490;AT5G59530
104	GO:0055074	5.92e-06	6.52175	2.70858	12	32	calcium ion homeostasis	AT1G05200;AT2G29100;AT2G29110;AT3G51860;AT5G48400;AT5G48410;AT5G11180;AT5G11210;AT5G27100;AT1G08450;AT3G07520;AT5G14870
105	GO:0009581	6.24e-06	4.30353	5.07859	17	60	detection of external stimulus	AT1G32960;AT1G02450;AT1G10340;AT1G73805;AT2G30770;AT3G09010;AT3G26830;AT3G47480;AT4G11890;AT4G14365;AT5G52760;AT5G22570;AT1G01560;AT1G74360;AT2G25000;AT3G52430;AT4G03450
106	GO:0071702	8.72e-06	1.41329	158.875	211	1877	organic substance transport	AT1G03550;AT1G05880;AT1G07410;AT1G12100;AT1G23940;AT1G24530;AT1G30840;AT1G30900;AT1G33600;AT1G53920;AT1G57630;AT1G61800;AT1G62500;AT1G64230;AT1G65730;AT1G72120;AT1G73780;AT1G75040;AT1G78410;AT1G02360;AT1G02440;AT1G02450;AT1G03550;AT1G03660;AT1G07000;AT1G08560;AT1G15520;AT1G22550;AT1G28480;AT1G31820;AT1G51790;AT1G51850;AT1G51890;AT1G60970;AT1G62510;AT1G65520;AT1G67650;AT1G73805;AT1G78740;AT2G03590…	AT1G03550;ARI12;RABA2b;AT1G12100;AT1G23940;AT1G24530;PUP4;VSR6;AT1G33600;GLIP5;AT1G57630;GPT2;AT1G62500;UBC28;YSL7;AT1G72120;AT1G73780;PR5;AT1G78410;AT1G02360;ARFD1A;NIMIN1;AT1G03550;AT1G03660;EXO70B2;SYP111;PDR12;AT1G22550;GRX480;AT1G31820;AT1G51790;AT1G51850;AT1G51890;AT1G60970;AT1G62510;ECI1;AT1G67650;AT1G73805;AT1G78740;UPS1;NUDT6;LURP1;LTP;SYP112;CYP96A5;AT2G23830;GDU4;AT2G29370;MEE22;VSR5;Y…
107	GO:0071495	9.57e-06	1.63518	68.2223	104	806	cellular response to endogenous stimulus	AT1G05200;AT1G06620;AT1G15080;AT1G17350;AT1G33600;AT1G52400;AT1G57630;AT1G75040;AT1G78410;AT1G02450;AT1G15520;AT1G27940;AT1G28480;AT1G32350;AT1G73805;AT2G04450;AT2G14560;AT2G26020;AT2G28160;AT2G35980;AT2G40670;AT2G46270;AT2G47190;AT2G14610;AT2G26560;AT2G30770;AT2G32030;AT2G32680;AT2G33580;AT2G40750;AT3G09020;AT3G16360;AT3G25780;AT3G26200;AT3G26830;AT3G47380;AT3G59220;AT3G08720;AT3G29410;AT3G47480…
108	GO:0043090	1.1e-05	3.69477	6.34823	19	75	amino acid import	AT1G57630;AT2G39210;AT3G50770;AT3G52400;AT4G13510;AT5G13490;AT5G40780;AT5G26340;AT1G01010;AT1G62300;AT1G79900;AT3G11820;AT3G18250;AT3G18830;AT4G21120;AT4G35110;AT5G09420;AT5G50200;AT5G15870
109	GO:0006874	1.28e-05	6.6398	2.45465	11	29	cellular calcium ion homeostasis	AT1G05200;AT2G29100;AT2G29110;AT3G51860;AT5G48400;AT5G48410;AT5G11180;AT5G11210;AT5G27100;AT3G07520;AT5G14870
110	GO:0007568	1.3e-05	2.64101	13.035	30	154	aging	AT1G17020;AT1G54040;AT1G69930;AT2G13810;AT2G29350;AT2G35980;AT2G47190;AT2G40750;AT3G11340;AT3G29035;AT3G49620;AT3G04070;AT3G10320;AT3G56400;AT4G23700;AT4G23810;AT5G62165;AT5G66170;AT1G20780;AT1G73680;AT2G38860;AT2G43000;AT3G51430;AT3G52430;AT5G13330;AT5G14930;AT5G45900;AT5G58350;AT5G25770;AT5G55560
111	GO:0009723	1.55e-05	1.97956	29.879	54	353	response to ethylene stimulus	AT1G78410;AT1G15520;AT1G26380;AT1G28480;AT1G32350;AT1G79680;AT2G15480;AT2G23270;AT2G26020;AT2G28160;AT2G28210;AT2G46270;AT2G47190;AT2G26560;AT2G30770;AT2G32030;AT3G25780;AT3G26200;AT3G26830;AT3G28580;AT3G49620;AT3G08720;AT3G48850;AT3G52400;AT4G11370;AT4G01870;AT4G19370;AT4G37290;AT5G38895;AT5G13080;AT5G19880;AT5G44420;AT1G01560;AT1G64710;AT1G64610;AT1G69270;AT2G06050;AT2G14580;AT2G38860;AT2G43000…
112	GO:0016310	1.8e-05	1.47342	111.136	154	1313	phosphorylation	AT1G16130;AT1G16150;AT1G16160;AT1G21245;AT1G33770;AT1G34420;AT1G35710;AT1G65250;AT1G20590;AT1G20610;AT1G23700;AT1G27190;AT1G51790;AT1G51850;AT1G51890;AT1G56120;AT1G61440;AT1G61490;AT1G61500;AT1G67000;AT1G67520;AT1G79680;AT2G13800;AT2G19230;AT2G28960;AT3G09010;AT3G20200;AT3G46370;AT3G57740;AT3G05140;AT3G06630;AT3G08720;AT3G10660;AT3G17680;AT3G45420;AT3G45430;AT3G52530;AT4G00960;AT4G02800;AT4G11890…
113	GO:0032870	2.02e-05	1.60915	67.7991	102	801	cellular response to hormone stimulus	AT1G06620;AT1G15080;AT1G17350;AT1G33600;AT1G52400;AT1G57630;AT1G75040;AT1G78410;AT1G02450;AT1G15520;AT1G27940;AT1G28480;AT1G32350;AT1G73805;AT2G04450;AT2G14560;AT2G26020;AT2G28160;AT2G35980;AT2G40670;AT2G46270;AT2G47190;AT2G14610;AT2G26560;AT2G30770;AT2G32030;AT2G32680;AT2G40750;AT3G09020;AT3G16360;AT3G25780;AT3G26200;AT3G26830;AT3G47380;AT3G59220;AT3G08720;AT3G29410;AT3G47480;AT3G48090;AT3G52400…
114	GO:0036294	2.76e-05	6.78791	2.20072	10	26	cellular response to decreased oxygen levels	AT1G05880;AT1G57630;AT1G19250;AT1G26380;AT1G53620;AT2G23270;AT2G26560;AT3G62410;AT5G26920;AT5G57510
115	GO:0071453	2.76e-05	6.78791	2.20072	10	26	cellular response to oxygen levels	AT1G05880;AT1G57630;AT1G19250;AT1G26380;AT1G53620;AT2G23270;AT2G26560;AT3G62410;AT5G26920;AT5G57510
116	GO:0009404	4e-05	2.24713	17.8597	36	211	toxin metabolic process	AT1G49860;AT1G59670;AT1G65980;AT1G69930;AT2G15480;AT2G41380;AT2G29460;AT2G29480;AT2G34500;AT2G48150;AT3G13610;AT4G20860;AT4G37990;AT4G01870;AT4G23700;AT5G38710;AT5G16980;AT5G27920;AT5G49310;AT5G62480;AT1G27980;AT1G68620;AT1G02930;AT1G62300;AT1G69920;AT1G74590;AT2G30140;AT2G31945;AT2G29470;AT3G43800;AT3G44190;AT3G47730;AT4G21120;AT4G36990;AT5G13330;AT5G59530
117	GO:0009407	4e-05	2.24713	17.8597	36	211	toxin catabolic process	AT1G49860;AT1G59670;AT1G65980;AT1G69930;AT2G15480;AT2G41380;AT2G29460;AT2G29480;AT2G34500;AT2G48150;AT3G13610;AT4G20860;AT4G37990;AT4G01870;AT4G23700;AT5G38710;AT5G16980;AT5G27920;AT5G49310;AT5G62480;AT1G27980;AT1G68620;AT1G02930;AT1G62300;AT1G69920;AT1G74590;AT2G30140;AT2G31945;AT2G29470;AT3G43800;AT3G44190;AT3G47730;AT4G21120;AT4G36990;AT5G13330;AT5G59530
118	GO:0071456	8.85e-05	6.51342	2.03143	9	24	cellular response to hypoxia	AT1G05880;AT1G57630;AT1G19250;AT1G26380;AT1G53620;AT2G23270;AT2G26560;AT5G26920;AT5G57510
119	GO:0072503	0.000126414	4.0365	4.06287	13	48	cellular divalent inorganic cation homeostasis	AT1G05200;AT2G29100;AT2G29110;AT3G51860;AT3G22910;AT5G48400;AT5G48410;AT5G11180;AT5G11210;AT5G27100;AT3G07520;AT3G63380;AT5G14870
120	GO:0072507	0.000145661	3.71169	4.65537	14	55	divalent inorganic cation homeostasis	AT1G05200;AT2G29100;AT2G29110;AT3G51860;AT3G22910;AT5G48400;AT5G48410;AT5G11180;AT5G11210;AT5G27100;AT1G08450;AT3G07520;AT3G63380;AT5G14870
121	GO:0015748	0.000198389	3.08177	6.51752	17	77	organophosphate ester transport	AT1G61800;AT3G13900;AT3G52400;AT4G13510;AT5G13490;AT5G40780;AT1G72700;AT1G68710;AT2G13650;AT3G11820;AT3G25610;AT4G21120;AT4G23010;AT4G28390;AT5G04930;AT5G09420;AT5G50200
122	GO:0019375	0.000205883	2.75537	8.37967	20	99	galactolipid biosynthetic process	AT1G08310;AT1G67600;AT1G69930;AT2G34500;AT2G45570;AT4G04490;AT5G03545;AT5G48400;AT5G13080;AT1G32940;AT1G75420;AT1G04920;AT3G52820;AT3G62590;AT5G09570;AT5G11110;AT5G37180;AT5G45900;AT5G58350;AT5G54730
123	GO:0019374	0.000237174	2.7208	8.46431	20	100	galactolipid metabolic process	AT1G08310;AT1G67600;AT1G69930;AT2G34500;AT2G45570;AT4G04490;AT5G03545;AT5G48400;AT5G13080;AT1G32940;AT1G75420;AT1G04920;AT3G52820;AT3G62590;AT5G09570;AT5G11110;AT5G37180;AT5G45900;AT5G58350;AT5G54730
124	GO:0010150	0.000279516	3.10667	6.0943	16	72	leaf senescence	AT1G54040;AT2G13810;AT2G35980;AT2G40750;AT3G11340;AT3G29035;AT3G56400;AT4G23810;AT5G62165;AT1G20780;AT1G73680;AT2G38860;AT2G43000;AT3G51430;AT3G52430;AT5G45900
125	GO:0006811	0.000319801	1.39163	107.327	142	1268	ion transport	AT1G05200;AT1G22500;AT1G49860;AT1G50400;AT1G53920;AT1G57630;AT1G61800;AT1G65730;AT1G67330;AT1G74810;AT1G02360;AT1G03850;AT1G15520;AT1G51790;AT1G51850;AT1G55790;AT1G65520;AT1G67330;AT1G69810;AT1G73260;AT1G77330;AT2G04032;AT2G24762;AT2G26820;AT2G28160;AT2G43820;AT2G46430;AT2G04040;AT2G27660;AT2G28960;AT2G33260;AT2G39210;AT2G43620;AT2G44380;AT3G13900;AT3G16460;AT3G17630;AT3G17690;AT3G47380;AT3G50770…
126	GO:0009725	0.000371193	1.34458	135.09	173	1596	response to hormone stimulus	AT1G06620;AT1G13430;AT1G15080;AT1G17020;AT1G17350;AT1G24530;AT1G33600;AT1G52400;AT1G57630;AT1G75040;AT1G78410;AT1G02450;AT1G03850;AT1G15520;AT1G26380;AT1G27940;AT1G28480;AT1G29440;AT1G29460;AT1G32350;AT1G54040;AT1G73805;AT1G79680;AT2G04450;AT2G14560;AT2G15480;AT2G21220;AT2G23120;AT2G23270;AT2G26020;AT2G28160;AT2G28210;AT2G35980;AT2G39030;AT2G40670;AT2G46270;AT2G47190;AT2G02850;AT2G14610;AT2G26560…
127	GO:0015802	0.000459523	4.88394	2.45465	9	29	basic amino acid transport	AT3G52400;AT4G13510;AT5G13490;AT5G40780;AT1G79900;AT3G11820;AT4G21120;AT5G09420;AT5G50200
128	GO:0032787	0.000463953	1.38202	105.635	139	1248	monocarboxylic acid metabolic process	AT1G17610;AT1G24150;AT1G30900;AT1G31580;AT1G34420;AT1G52400;AT1G57630;AT1G58150;AT1G64230;AT1G75040;AT1G78410;AT1G02450;AT1G07000;AT1G10340;AT1G13340;AT1G13470;AT1G13750;AT1G15520;AT1G28480;AT1G57750;AT1G65520;AT1G69930;AT1G73805;AT2G04450;AT2G05380;AT2G14560;AT2G34940;AT2G43820;AT2G14060;AT2G14610;AT2G26560;AT2G30770;AT2G40750;AT2G41470;AT2G45760;AT2G46400;AT2G48150;AT3G09020;AT3G13950;AT3G25780…
129	GO:0050794	0.000465818	1.20608	410.519	469	4850	regulation of cellular process	AT1G01380;AT1G02580;AT1G05200;AT1G05420;AT1G06620;AT1G07410;AT1G08310;AT1G09665;AT1G12340;AT1G12630;AT1G15080;AT1G17250;AT1G17350;AT1G17610;AT1G17615;AT1G18860;AT1G27180;AT1G29860;AT1G32310;AT1G33600;AT1G34420;AT1G35530;AT1G35710;AT1G49860;AT1G50400;AT1G51270;AT1G52260;AT1G52400;AT1G56540;AT1G57630;AT1G57850;AT1G60983;AT1G61800;AT1G61840;AT1G64230;AT1G64800;AT1G65850;AT1G68200;AT1G75390;AT1G72870…
130	GO:0006944	0.000492786	1.86594	23.1922	40	274	cellular membrane fusion	AT1G03550;AT1G64230;AT1G75040;AT1G03550;AT1G05570;AT1G07000;AT1G08560;AT1G69120;AT2G18260;AT2G35980;AT2G26560;AT3G47480;AT3G48090;AT3G52400;AT3G56400;AT3G57260;AT4G12020;AT4G13510;AT4G14365;AT5G10260;AT5G13490;AT5G26920;AT5G40780;AT1G74360;AT1G74710;AT3G02840;AT3G09830;AT3G52430;AT3G11820;AT3G11840;AT3G55950;AT4G20830;AT4G21120;AT4G26070;AT4G39890;AT5G09420;AT5G25930;AT5G45110;AT5G46880;AT5G50200…
131	GO:0061025	0.000492786	1.86594	23.1922	40	274	membrane fusion	AT1G03550;AT1G64230;AT1G75040;AT1G03550;AT1G05570;AT1G07000;AT1G08560;AT1G69120;AT2G18260;AT2G35980;AT2G26560;AT3G47480;AT3G48090;AT3G52400;AT3G56400;AT3G57260;AT4G12020;AT4G13510;AT4G14365;AT5G10260;AT5G13490;AT5G26920;AT5G40780;AT1G74360;AT1G74710;AT3G02840;AT3G09830;AT3G52430;AT3G11820;AT3G11840;AT3G55950;AT4G20830;AT4G21120;AT4G26070;AT4G39890;AT5G09420;AT5G25930;AT5G45110;AT5G46880;AT5G50200…
132	GO:0009738	0.000517583	1.91326	20.9915	37	248	abscisic acid mediated signaling pathway	AT1G15080;AT1G52400;AT1G15520;AT1G28480;AT1G32350;AT2G46270;AT2G47190;AT2G32030;AT3G25780;AT3G59220;AT3G08720;AT3G52400;AT4G01870;AT4G04490;AT5G01560;AT5G46790;AT1G01560;AT1G08050;AT1G52920;AT1G64610;AT1G69270;AT2G41070;AT2G06050;AT3G20410;AT3G21780;AT3G52430;AT3G63010;AT3G02140;AT3G11820;AT3G21780;AT3G55950;AT4G39670;AT4G39890;AT4G18010;AT4G29810;AT5G25930;AT5G54490;AT5G67340
133	GO:0010167	0.000573114	2.03561	16.6747	31	197	response to nitrate	AT1G22500;AT1G67330;AT1G02360;AT1G03850;AT1G67330;AT1G73260;AT1G77330;AT2G26820;AT2G43820;AT2G27660;AT2G28960;AT2G44380;AT3G16460;AT3G59220;AT3G01420;AT3G09220;AT3G13790;AT3G22600;AT3G47040;AT4G12390;AT4G20860;AT4G21600;AT4G15400;AT1G51830;AT2G39110;AT4G13660;AT4G20110;AT4G23470;AT5G17330;AT5G20400;AT5G50200;AT5G26010
134	GO:0015698	0.000611783	1.81234	24.9697	42	295	inorganic anion transport	AT1G22500;AT1G49860;AT1G67330;AT1G02360;AT1G03850;AT1G67330;AT1G69810;AT1G73260;AT1G77330;AT2G26820;AT2G43820;AT2G27660;AT2G28960;AT2G44380;AT3G16460;AT3G59220;AT3G01420;AT3G09220;AT3G13790;AT3G22600;AT3G46980;AT3G47040;AT3G52400;AT4G12390;AT4G13510;AT4G20860;AT4G21600;AT4G15400;AT5G13490;AT5G40780;AT1G67940;AT1G51830;AT2G39110;AT3G11820;AT4G13660;AT4G20110;AT4G21120;AT4G23470;AT5G09420;AT5G17330…
135	GO:0015706	0.000645865	1.99338	17.5211	32	207	nitrate transport	AT1G22500;AT1G67330;AT1G02360;AT1G03850;AT1G67330;AT1G73260;AT1G77330;AT2G26820;AT2G43820;AT2G27660;AT2G28960;AT2G44380;AT3G16460;AT3G59220;AT3G01420;AT3G09220;AT3G13790;AT3G22600;AT3G46980;AT3G47040;AT4G12390;AT4G20860;AT4G21600;AT4G15400;AT1G51830;AT2G39110;AT4G13660;AT4G20110;AT4G23470;AT5G17330;AT5G20400;AT5G50200;AT5G26010
136	GO:0006605	0.000688543	1.4356	76.1788	104	900	protein targeting	AT1G05880;AT1G30900;AT1G33600;AT1G57630;AT1G64230;AT1G75040;AT1G78410;AT1G02450;AT1G03660;AT1G07000;AT1G15520;AT1G28480;AT1G51890;AT1G67650;AT1G73805;AT2G04450;AT2G14560;AT2G21910;AT2G23830;AT2G34940;AT2G35980;AT2G14610;AT2G20720;AT2G26560;AT2G30770;AT2G32680;AT2G40750;AT3G09020;AT3G13950;AT3G25780;AT3G26830;AT3G47380;AT3G08720;AT3G22160;AT3G47480;AT3G48090;AT3G52400;AT3G56400;AT3G57240;AT3G57260…
137	GO:0048523	0.000689566	1.46674	66.7834	93	789	negative regulation of cellular process	AT1G02580;AT1G05420;AT1G08310;AT1G35530;AT1G75040;AT1G79840;AT1G02450;AT1G07000;AT1G15520;AT1G28480;AT1G51890;AT1G67600;AT1G69120;AT2G14560;AT2G34780;AT2G35980;AT2G26560;AT3G13950;AT3G15170;AT3G25780;AT3G22160;AT3G47480;AT3G48090;AT3G52400;AT3G56400;AT3G57260;AT4G01730;AT4G13510;AT4G04490;AT4G14365;AT4G19700;AT4G24580;AT4G25110;AT5G03545;AT5G07780;AT5G13490;AT5G26920;AT5G40780;AT5G52760;AT5G22570…
138	GO:0002252	0.0007605	1.81878	23.7001	40	280	immune effector process	AT1G75040;AT1G02360;AT1G51790;AT2G35980;AT2G26560;AT2G27660;AT2G32030;AT2G43620;AT3G09020;AT3G13790;AT3G47480;AT3G48090;AT3G52400;AT3G56400;AT3G57260;AT4G20860;AT4G26120;AT4G14365;AT4G21400;AT4G22530;AT1G74360;AT1G74710;AT1G77720;AT1G15310;AT1G62300;AT1G63640;AT3G52430;AT3G11820;AT3G11840;AT3G20420;AT3G63380;AT4G20830;AT4G26070;AT4G39670;AT4G18880;AT5G05190;AT5G23570;AT5G25930;AT5G08120;AT5G47220
139	GO:0010120	0.00129279	9.03203	0.931074	5	11	camalexin biosynthetic process	AT2G30770;AT3G26830;AT3G56400;AT2G43000;AT4G27260
140	GO:0052317	0.00129279	9.03203	0.931074	5	11	camalexin metabolic process	AT2G30770;AT3G26830;AT3G56400;AT2G43000;AT4G27260
141	GO:0071215	0.00144568	1.79304	22.1765	37	262	cellular response to abscisic acid stimulus	AT1G15080;AT1G52400;AT1G15520;AT1G28480;AT1G32350;AT2G46270;AT2G47190;AT2G32030;AT3G25780;AT3G59220;AT3G08720;AT3G52400;AT4G01870;AT4G04490;AT5G01560;AT5G46790;AT1G01560;AT1G08050;AT1G52920;AT1G64610;AT1G69270;AT2G41070;AT2G06050;AT3G20410;AT3G21780;AT3G52430;AT3G63010;AT3G02140;AT3G11820;AT3G21780;AT3G55950;AT4G39670;AT4G39890;AT4G18010;AT4G29810;AT5G25930;AT5G54490;AT5G67340
142	GO:0009267	0.00149693	1.74521	24.5465	40	290	cellular response to starvation	AT1G08310;AT1G67600;AT1G69930;AT1G77330;AT2G04032;AT2G26820;AT2G47190;AT2G28960;AT2G34500;AT2G45570;AT3G49620;AT3G59220;AT3G01420;AT3G09220;AT3G47040;AT3G53420;AT3G56710;AT4G21600;AT4G04490;AT4G15400;AT5G03545;AT5G45380;AT5G48400;AT5G13080;AT1G23010;AT1G32940;AT1G08450;AT1G51830;AT1G62300;AT2G39110;AT3G55880;AT3G52820;AT3G62590;AT4G13660;AT4G26070;AT5G09570;AT5G45900;AT5G58350;AT5G26010;AT5G54730
143	GO:0031667	0.00151567	1.70616	26.9165	43	318	response to nutrient levels	AT1G08310;AT1G22500;AT1G67600;AT1G69930;AT1G77330;AT2G04032;AT2G26820;AT2G47190;AT2G14610;AT2G28960;AT2G34500;AT2G45570;AT3G49620;AT3G59220;AT3G01420;AT3G09220;AT3G47040;AT3G53420;AT3G56710;AT4G21600;AT4G04490;AT4G15400;AT5G03545;AT5G45380;AT5G48400;AT5G13080;AT1G05630;AT1G23010;AT1G32940;AT1G08450;AT1G51830;AT1G62300;AT2G39110;AT3G55880;AT3G52820;AT3G62590;AT4G13660;AT4G26070;AT5G09570;AT5G45900…
144	GO:0006643	0.00176114	1.92572	16.3361	29	193	membrane lipid metabolic process	AT1G08310;AT1G31820;AT1G67600;AT1G69930;AT2G34500;AT2G45570;AT3G19260;AT4G39830;AT4G04490;AT4G11850;AT5G03545;AT5G46220;AT5G48400;AT5G13080;AT1G27980;AT1G32940;AT1G75420;AT1G04920;AT2G18770;AT3G52820;AT3G62590;AT5G09570;AT5G11110;AT5G11870;AT5G37180;AT5G45900;AT5G58350;AT5G08380;AT5G54730
145	GO:0009625	0.00180324	2.62859	6.51752	15	77	response to insect	AT1G52400;AT1G74080;AT1G07000;AT2G29350;AT3G26830;AT3G52400;AT3G56400;AT5G44420;AT3G14210;AT1G72900;AT3G52430;AT3G11820;AT4G26070;AT4G39640;AT5G37480
146	GO:0015031	0.00192135	1.34328	97.932	126	1157	protein transport	AT1G03550;AT1G05880;AT1G07410;AT1G23940;AT1G30900;AT1G33600;AT1G57630;AT1G64230;AT1G75040;AT1G78410;AT1G02440;AT1G02450;AT1G03550;AT1G03660;AT1G07000;AT1G08560;AT1G15520;AT1G28480;AT1G51890;AT1G60970;AT1G67650;AT1G73805;AT2G04450;AT2G14560;AT2G18260;AT2G21910;AT2G23830;AT2G34940;AT2G35980;AT2G44690;AT2G14610;AT2G20720;AT2G26560;AT2G30770;AT2G32680;AT2G40750;AT3G09020;AT3G10780;AT3G13950;AT3G25780…
147	GO:0045184	0.00192135	1.34328	97.932	126	1157	establishment of protein localization	AT1G03550;AT1G05880;AT1G07410;AT1G23940;AT1G30900;AT1G33600;AT1G57630;AT1G64230;AT1G75040;AT1G78410;AT1G02440;AT1G02450;AT1G03550;AT1G03660;AT1G07000;AT1G08560;AT1G15520;AT1G28480;AT1G51890;AT1G60970;AT1G67650;AT1G73805;AT2G04450;AT2G14560;AT2G18260;AT2G21910;AT2G23830;AT2G34940;AT2G35980;AT2G44690;AT2G14610;AT2G20720;AT2G26560;AT2G30770;AT2G32680;AT2G40750;AT3G09020;AT3G10780;AT3G13950;AT3G25780…
148	GO:0009700	0.00206231	7.74138	1.01572	5	12	indole phytoalexin biosynthetic process	AT2G30770;AT3G26830;AT3G56400;AT2G43000;AT4G27260
149	GO:0046217	0.00206231	7.74138	1.01572	5	12	indole phytoalexin metabolic process	AT2G30770;AT3G26830;AT3G56400;AT2G43000;AT4G27260
150	GO:0052314	0.00206231	7.74138	1.01572	5	12	phytoalexin metabolic process	AT2G30770;AT3G26830;AT3G56400;AT2G43000;AT4G27260
151	GO:0052315	0.00206231	7.74138	1.01572	5	12	phytoalexin biosynthetic process	AT2G30770;AT3G26830;AT3G56400;AT2G43000;AT4G27260
152	GO:0009247	0.00208935	2.21921	9.98788	20	118	glycolipid biosynthetic process	AT1G08310;AT1G67600;AT1G69930;AT2G34500;AT2G45570;AT4G04490;AT5G03545;AT5G48400;AT5G13080;AT1G32940;AT1G75420;AT1G04920;AT3G52820;AT3G62590;AT5G09570;AT5G11110;AT5G37180;AT5G45900;AT5G58350;AT5G54730
153	GO:0042594	0.00232864	1.69712	25.139	40	297	response to starvation	AT1G08310;AT1G67600;AT1G69930;AT1G77330;AT2G04032;AT2G26820;AT2G47190;AT2G28960;AT2G34500;AT2G45570;AT3G49620;AT3G59220;AT3G01420;AT3G09220;AT3G47040;AT3G53420;AT3G56710;AT4G21600;AT4G04490;AT4G15400;AT5G03545;AT5G45380;AT5G48400;AT5G13080;AT1G23010;AT1G32940;AT1G08450;AT1G51830;AT1G62300;AT2G39110;AT3G55880;AT3G52820;AT3G62590;AT4G13660;AT4G26070;AT5G09570;AT5G45900;AT5G58350;AT5G26010;AT5G54730
154	GO:0006886	0.00257411	1.34988	88.1135	114	1041	intracellular protein transport	AT1G05880;AT1G07410;AT1G23940;AT1G30900;AT1G33600;AT1G57630;AT1G64230;AT1G75040;AT1G78410;AT1G02440;AT1G02450;AT1G03660;AT1G07000;AT1G08560;AT1G15520;AT1G28480;AT1G51890;AT1G60970;AT1G67650;AT1G73805;AT2G04450;AT2G14560;AT2G18260;AT2G21910;AT2G23830;AT2G34940;AT2G35980;AT2G14610;AT2G20720;AT2G26560;AT2G30770;AT2G32680;AT2G40750;AT3G09020;AT3G10780;AT3G13950;AT3G25780;AT3G26830;AT3G29070;AT3G47380…
155	GO:0015696	0.00279714	3.94427	2.53929	8	30	ammonium transport	AT3G52400;AT4G13510;AT5G13490;AT5G40780;AT3G11820;AT4G21120;AT5G09420;AT5G50200
156	GO:0035966	0.00287783	1.60253	31.064	47	367	response to topologically incorrect protein	AT1G64230;AT1G75390;AT1G07000;AT1G28480;AT1G69930;AT2G46270;AT3G08720;AT3G51890;AT3G52400;AT4G04490;AT4G14365;AT4G22530;AT4G35180;AT5G40780;AT5G42010;AT5G42380;AT1G01560;AT1G16670;AT1G27980;AT1G74360;AT1G75390;AT1G08050;AT1G21310;AT1G24140;AT1G64610;AT1G69270;AT2G41070;AT2G44065;AT2G29470;AT3G02840;AT3G20410;AT3G52430;AT3G63010;AT3G11820;AT3G49370;AT3G63380;AT4G20830;AT4G36990;AT4G39670;AT4G39890…
157	GO:0031669	0.00314427	1.66434	25.5622	40	302	cellular response to nutrient levels	AT1G08310;AT1G67600;AT1G69930;AT1G77330;AT2G04032;AT2G26820;AT2G47190;AT2G28960;AT2G34500;AT2G45570;AT3G49620;AT3G59220;AT3G01420;AT3G09220;AT3G47040;AT3G53420;AT3G56710;AT4G21600;AT4G04490;AT4G15400;AT5G03545;AT5G45380;AT5G48400;AT5G13080;AT1G23010;AT1G32940;AT1G08450;AT1G51830;AT1G62300;AT2G39110;AT3G55880;AT3G52820;AT3G62590;AT4G13660;AT4G26070;AT5G09570;AT5G45900;AT5G58350;AT5G26010;AT5G54730
158	GO:0034613	0.00340173	1.3329	90.6527	116	1071	cellular protein localization	AT1G05880;AT1G07410;AT1G23940;AT1G30900;AT1G33600;AT1G57630;AT1G64230;AT1G75040;AT1G78410;AT1G02440;AT1G02450;AT1G03660;AT1G07000;AT1G08560;AT1G15520;AT1G28480;AT1G51890;AT1G60970;AT1G67650;AT1G73805;AT2G04450;AT2G14560;AT2G18260;AT2G21910;AT2G23830;AT2G34940;AT2G35980;AT2G14610;AT2G20720;AT2G26560;AT2G30770;AT2G32680;AT2G40750;AT3G09020;AT3G10780;AT3G13950;AT3G25780;AT3G26830;AT3G29070;AT3G47380…
159	GO:0006664	0.00360915	2.05706	11.1729	21	132	glycolipid metabolic process	AT1G08310;AT1G67600;AT1G69930;AT2G34500;AT2G45570;AT4G04490;AT5G03545;AT5G48400;AT5G13080;AT1G32940;AT1G75420;AT1G04920;AT3G52820;AT3G62590;AT5G09570;AT5G11110;AT5G37180;AT5G45900;AT5G58350;AT5G08380;AT5G54730
160	GO:0070727	0.00366094	1.3245	93.5306	119	1105	cellular macromolecule localization	AT1G05880;AT1G07410;AT1G23940;AT1G30900;AT1G33600;AT1G57630;AT1G64230;AT1G75040;AT1G78410;AT1G02440;AT1G02450;AT1G03660;AT1G05570;AT1G07000;AT1G08560;AT1G15520;AT1G28480;AT1G51890;AT1G60970;AT1G67650;AT1G69120;AT1G73805;AT2G04450;AT2G14560;AT2G18260;AT2G21910;AT2G23830;AT2G34940;AT2G35980;AT2G14610;AT2G20720;AT2G26560;AT2G30770;AT2G32680;AT2G40750;AT3G09020;AT3G10780;AT3G13950;AT3G25780;AT3G26830…
161	GO:0046467	0.00393624	1.93376	13.4583	24	159	membrane lipid biosynthetic process	AT1G08310;AT1G31820;AT1G67600;AT1G69930;AT2G34500;AT2G45570;AT3G19260;AT4G39830;AT4G04490;AT5G03545;AT5G48400;AT5G13080;AT1G32940;AT1G75420;AT1G04920;AT2G18770;AT3G52820;AT3G62590;AT5G09570;AT5G11110;AT5G37180;AT5G45900;AT5G58350;AT5G54730
162	GO:0042538	0.00426844	1.91945	13.5429	24	160	hyperosmotic salinity response	AT1G06620;AT1G15520;AT1G28480;AT2G46270;AT2G47190;AT3G22160;AT3G52400;AT5G46050;AT5G67450;AT1G01560;AT1G29330;AT1G48605;AT1G69270;AT2G06050;AT2G25090;AT2G43000;AT2G43320;AT3G21780;AT3G63010;AT3G11820;AT3G21780;AT4G36990;AT4G18010;AT5G54490;AT5G67340
163	GO:0015914	0.00451659	6.02052	1.185	5	14	phospholipid transport	AT3G13900;AT1G72700;AT1G68710;AT3G25610;AT5G04930
164	GO:0006862	0.00494794	2.77623	4.57073	11	54	nucleotide transport	AT3G52400;AT4G13510;AT5G13490;AT5G40780;AT2G13650;AT3G11820;AT4G21120;AT4G23010;AT4G28390;AT5G09420;AT5G50200
165	GO:0097306	0.00510927	1.6219	25.4776	39	301	cellular response to alcohol	AT1G15080;AT1G52400;AT1G15520;AT1G28480;AT1G32350;AT2G46270;AT2G47190;AT2G32030;AT3G25780;AT3G59220;AT3G08720;AT3G52400;AT4G01870;AT4G04490;AT4G15400;AT5G01560;AT5G46790;AT1G01560;AT1G08050;AT1G52920;AT1G64610;AT1G69270;AT2G41070;AT2G06050;AT3G20410;AT3G21780;AT3G46290;AT3G52430;AT3G63010;AT3G02140;AT3G11820;AT3G21780;AT3G55950;AT4G39670;AT4G39890;AT4G18010;AT4G29810;AT5G25930;AT5G54490;AT5G67340
166	GO:0009816	0.00528557	3.47047	2.79322	8	33	defense response to bacterium, incompatible interaction	AT3G56710;AT4G11850;AT4G23810;AT5G26920;AT5G56030;AT3G20600;AT3G52430;AT5G45110
167	GO:1900056	0.005314	16.2444	0.423215	3	5	negative regulation of leaf senescence	AT2G40750;AT3G56400;AT2G43000
168	GO:0010421	0.00716117	Inf	0.169286	2	2	hydrogen peroxide-mediated programmed cell death	AT1G16420;AT3G13610
169	GO:0051245	0.00716117	Inf	0.169286	2	2	negative regulation of cellular defense response	AT3G52400;AT3G11820
170	GO:0044765	0.00736886	1.18003	260.87	297	3082	single-organism transport	AT1G05200;AT1G05880;AT1G12100;AT1G22500;AT1G24530;AT1G30840;AT1G30900;AT1G33600;AT1G49860;AT1G50400;AT1G53920;AT1G57630;AT1G61800;AT1G62500;AT1G64230;AT1G65730;AT1G67330;AT1G71140;AT1G72120;AT1G73780;AT1G74810;AT1G75040;AT1G78410;AT1G02360;AT1G02450;AT1G03660;AT1G03850;AT1G07000;AT1G15520;AT1G22550;AT1G27940;AT1G28480;AT1G29440;AT1G31820;AT1G51790;AT1G51850;AT1G51890;AT1G55790;AT1G62510;AT1G65520…	GLR3.4;ARI12;AT1G12100;AT1G22500;AT1G24530;PUP4;VSR6;AT1G33600;GSTF14;AT1G50400;GLIP5;AT1G57630;GPT2;AT1G62500;UBC28;YSL7;AT1G67330;AT1G71140;AT1G72120;AT1G73780;BOR5;PR5;AT1G78410;AT1G02360;NIMIN1;AT1G03660;AT1G03850;EXO70B2;PDR12;AT1G22550;PGP13;GRX480;AT1G29440;AT1G31820;AT1G51790;AT1G51850;AT1G51890;AT1G55790;AT1G62510;ECI1;AT1G67330;AT1G67650;WRKY36;KTI1;AT1G73805;AT1G77330;AT1G78740;UPS1;ZI…
171	GO:0006875	0.00755388	2.59481	4.82466	11	57	cellular metal ion homeostasis	AT1G05200;AT2G29100;AT2G29110;AT3G51860;AT5G48400;AT5G48410;AT5G11180;AT5G11210;AT5G27100;AT3G07520;AT5G14870
172	GO:0009991	0.00760082	1.53194	30.2176	44	357	response to extracellular stimulus	AT1G08310;AT1G22500;AT1G67600;AT1G69930;AT1G77330;AT2G04032;AT2G26820;AT2G47190;AT2G14610;AT2G28960;AT2G34500;AT2G45570;AT3G49620;AT3G59220;AT3G01420;AT3G09220;AT3G47040;AT3G53420;AT3G56710;AT4G21600;AT4G04490;AT4G15400;AT5G03545;AT5G45380;AT5G48400;AT5G13080;AT5G24090;AT1G05630;AT1G23010;AT1G32940;AT1G08450;AT1G51830;AT1G62300;AT2G39110;AT3G55880;AT3G52820;AT3G62590;AT4G13660;AT4G26070;AT5G09570…
173	GO:0006810	0.00801974	1.1684	295.489	333	3491	transport	AT1G03550;AT1G05200;AT1G05880;AT1G07410;AT1G12100;AT1G22500;AT1G23940;AT1G24530;AT1G30840;AT1G30900;AT1G33600;AT1G49860;AT1G50400;AT1G53920;AT1G57630;AT1G61800;AT1G62500;AT1G64230;AT1G65730;AT1G67330;AT1G71140;AT1G72120;AT1G73780;AT1G74810;AT1G75040;AT1G78410;AT1G02360;AT1G02440;AT1G02450;AT1G03550;AT1G03660;AT1G03850;AT1G07000;AT1G08560;AT1G15520;AT1G22550;AT1G27940;AT1G28480;AT1G29440;AT1G31820…	AT1G03550;GLR3.4;ARI12;RABA2b;AT1G12100;AT1G22500;AT1G23940;AT1G24530;PUP4;VSR6;AT1G33600;GSTF14;AT1G50400;GLIP5;AT1G57630;GPT2;AT1G62500;UBC28;YSL7;AT1G67330;AT1G71140;AT1G72120;AT1G73780;BOR5;PR5;AT1G78410;AT1G02360;ARFD1A;NIMIN1;AT1G03550;AT1G03660;AT1G03850;EXO70B2;SYP111;PDR12;AT1G22550;PGP13;GRX480;AT1G29440;AT1G31820;AT1G51790;AT1G51850;AT1G51890;AT1G55790;AT1G60970;AT1G62510;ECI1;AT1G6733…
174	GO:0016053	0.00806311	1.28048	99.5403	123	1176	organic acid biosynthetic process	AT1G17610;AT1G24150;AT1G30900;AT1G31580;AT1G34420;AT1G57630;AT1G75040;AT1G78410;AT1G02450;AT1G07000;AT1G07780;AT1G10340;AT1G13340;AT1G13470;AT1G13750;AT1G15520;AT1G28480;AT1G57750;AT1G73805;AT2G04450;AT2G05380;AT2G13810;AT2G14560;AT2G34940;AT2G14060;AT2G14610;AT2G26560;AT2G30770;AT2G40750;AT2G41470;AT2G45760;AT2G46400;AT2G48150;AT3G09020;AT3G13950;AT3G25780;AT3G26830;AT3G47380;AT3G19260;AT3G47480…
175	GO:0046394	0.00806311	1.28048	99.5403	123	1176	carboxylic acid biosynthetic process	AT1G17610;AT1G24150;AT1G30900;AT1G31580;AT1G34420;AT1G57630;AT1G75040;AT1G78410;AT1G02450;AT1G07000;AT1G07780;AT1G10340;AT1G13340;AT1G13470;AT1G13750;AT1G15520;AT1G28480;AT1G57750;AT1G73805;AT2G04450;AT2G05380;AT2G13810;AT2G14560;AT2G34940;AT2G14060;AT2G14610;AT2G26560;AT2G30770;AT2G40750;AT2G41470;AT2G45760;AT2G46400;AT2G48150;AT3G09020;AT3G13950;AT3G25780;AT3G26830;AT3G47380;AT3G19260;AT3G47480…
176	GO:0044273	0.00832575	4.06457	1.86215	6	22	sulfur compound catabolic process	AT1G54040;AT3G16390;AT3G16410;AT3G14210;AT4G39640;AT5G37830
177	GO:0008104	0.00853265	1.27275	103.349	127	1221	protein localization	AT1G03550;AT1G05880;AT1G07410;AT1G23940;AT1G30900;AT1G33600;AT1G57630;AT1G64230;AT1G75040;AT1G78410;AT1G02440;AT1G02450;AT1G03550;AT1G03660;AT1G07000;AT1G08560;AT1G15520;AT1G28480;AT1G51890;AT1G60970;AT1G67650;AT1G73805;AT2G04450;AT2G14560;AT2G18260;AT2G21910;AT2G23830;AT2G34940;AT2G35980;AT2G44690;AT2G14610;AT2G20720;AT2G26560;AT2G30770;AT2G32680;AT2G40750;AT3G09020;AT3G10780;AT3G13950;AT3G25780…
178	GO:0016045	0.00854402	4.92542	1.35429	5	16	detection of bacterium	AT1G02450;AT2G30770;AT3G26830;AT5G22570;AT2G25000
179	GO:0071496	0.00904257	1.53021	28.8633	42	341	cellular response to external stimulus	AT1G05200;AT1G08310;AT1G67600;AT1G69930;AT1G77330;AT2G04032;AT2G26820;AT2G47190;AT2G28960;AT2G34500;AT2G45570;AT3G49620;AT3G59220;AT3G01420;AT3G09220;AT3G47040;AT3G53420;AT3G56710;AT4G21600;AT4G04490;AT4G15400;AT5G03545;AT5G45380;AT5G48400;AT5G13080;AT5G24090;AT1G23010;AT1G32940;AT1G08450;AT1G51830;AT1G62300;AT2G39110;AT3G55880;AT3G52820;AT3G62590;AT4G13660;AT4G26070;AT5G09570;AT5G45900;AT5G58350…
180	GO:0016998	0.00912728	3.4495	2.45465	7	29	cell wall macromolecule catabolic process	AT1G02360;AT2G43590;AT2G43620;AT3G47540;AT2G17120;AT2G43570;AT5G15870
181	GO:0042631	0.00988227	2.3677	5.67109	12	67	cellular response to water deprivation	AT1G69930;AT2G34500;AT2G45570;AT4G04490;AT5G48400;AT5G13080;AT5G24090;AT1G32940;AT3G62590;AT5G45900;AT5G58350;AT5G54730
182	GO:0055065	0.00988227	2.3677	5.67109	12	67	metal ion homeostasis	AT1G05200;AT2G29100;AT2G29110;AT3G51860;AT5G48400;AT5G48410;AT5G11180;AT5G11210;AT5G27100;AT1G08450;AT3G07520;AT5G14870
183	GO:0071462	0.00988227	2.3677	5.67109	12	67	cellular response to water stimulus	AT1G69930;AT2G34500;AT2G45570;AT4G04490;AT5G48400;AT5G13080;AT5G24090;AT1G32940;AT3G62590;AT5G45900;AT5G58350;AT5G54730
184	GO:1900055	0.00996032	10.8291	0.507859	3	6	regulation of leaf senescence	AT2G40750;AT3G56400;AT2G43000
185	GO:0009414	0.010234	1.46723	34.9576	49	413	response to water deprivation	AT1G06620;AT1G52400;AT1G15520;AT1G28480;AT1G69930;AT2G23120;AT2G46270;AT2G47190;AT2G14610;AT2G34500;AT2G45570;AT3G26830;AT3G22160;AT3G52400;AT3G53420;AT4G11890;AT4G04490;AT4G19120;AT5G38710;AT5G48400;AT5G56030;AT5G13080;AT5G24090;AT5G26340;AT5G37500;AT5G49630;AT1G01560;AT1G32940;AT1G02930;AT1G29330;AT1G69270;AT2G06050;AT2G31870;AT2G43320;AT3G21780;AT3G63010;AT3G11820;AT3G21780;AT3G62590;AT4G26070…
186	GO:0031668	0.0137148	1.49302	28.7786	41	340	cellular response to extracellular stimulus	AT1G08310;AT1G67600;AT1G69930;AT1G77330;AT2G04032;AT2G26820;AT2G47190;AT2G28960;AT2G34500;AT2G45570;AT3G49620;AT3G59220;AT3G01420;AT3G09220;AT3G47040;AT3G53420;AT3G56710;AT4G21600;AT4G04490;AT4G15400;AT5G03545;AT5G45380;AT5G48400;AT5G13080;AT5G24090;AT1G23010;AT1G32940;AT1G08450;AT1G51830;AT1G62300;AT2G39110;AT3G55880;AT3G52820;AT3G62590;AT4G13660;AT4G26070;AT5G09570;AT5G45900;AT5G58350;AT5G26010…
187	GO:0009415	0.0137258	1.43907	35.5501	49	420	response to water stimulus	AT1G06620;AT1G52400;AT1G15520;AT1G28480;AT1G69930;AT2G23120;AT2G46270;AT2G47190;AT2G14610;AT2G34500;AT2G45570;AT3G26830;AT3G22160;AT3G52400;AT3G53420;AT4G11890;AT4G04490;AT4G19120;AT5G38710;AT5G48400;AT5G56030;AT5G13080;AT5G24090;AT5G26340;AT5G37500;AT5G49630;AT1G01560;AT1G32940;AT1G02930;AT1G29330;AT1G69270;AT2G06050;AT2G31870;AT2G43320;AT3G21780;AT3G63010;AT3G11820;AT3G21780;AT3G62590;AT4G26070…
188	GO:0035303	0.0143439	1.8105	11.85	20	140	regulation of dephosphorylation	AT1G33600;AT1G75040;AT1G02450;AT1G28480;AT1G73805;AT2G32680;AT3G48090;AT3G52400;AT3G56400;AT5G52760;AT5G22570;AT5G46790;AT5G60900;AT1G01560;AT1G76110;AT3G52430;AT3G11820;AT4G04220;AT4G26070;AT4G04220;AT4G29810
189	GO:0006560	0.0145661	5.416	1.01572	4	12	proline metabolic process	AT4G08870;AT5G38710;AT1G79900;AT2G43000
190	GO:0010112	0.0145661	5.416	1.01572	4	12	regulation of systemic acquired resistance	AT1G02450;AT1G73805;AT3G26830;AT5G26920
191	GO:0016036	0.0155061	1.82619	11.1729	19	132	cellular response to phosphate starvation	AT1G08310;AT1G67600;AT1G69930;AT2G47190;AT2G34500;AT2G45570;AT4G04490;AT5G03545;AT5G48400;AT5G13080;AT1G23010;AT1G32940;AT1G62300;AT3G52820;AT3G62590;AT5G09570;AT5G45900;AT5G58350;AT5G54730
192	GO:0050898	0.0163406	8.12143	0.592502	3	7	nitrile metabolic process	AT3G16390;AT3G16410;AT4G34880
193	GO:0006855	0.0171606	2.16989	6.0943	12	72	drug transmembrane transport	AT1G71140;AT1G15520;AT2G04040;AT2G04070;AT2G04080;AT2G04090;AT2G04100;AT4G39030;AT2G29940;AT4G23030;AT4G22790;AT5G17700
194	GO:0033036	0.0184719	1.21173	130.096	153	1537	macromolecule localization	AT1G03550;AT1G05880;AT1G07410;AT1G12100;AT1G23940;AT1G30900;AT1G33600;AT1G57630;AT1G62500;AT1G64230;AT1G73780;AT1G75040;AT1G78410;AT1G02440;AT1G02450;AT1G03550;AT1G03660;AT1G05570;AT1G07000;AT1G08560;AT1G15520;AT1G28480;AT1G51890;AT1G60970;AT1G62510;AT1G67650;AT1G69120;AT1G73805;AT2G04450;AT2G14560;AT2G15050;AT2G18260;AT2G21910;AT2G23830;AT2G34780;AT2G34940;AT2G35980;AT2G44690;AT2G02850;AT2G14610…
195	GO:0035304	0.0193032	1.77872	11.4268	19	135	regulation of protein dephosphorylation	AT1G33600;AT1G75040;AT1G02450;AT1G28480;AT1G73805;AT2G32680;AT3G48090;AT3G52400;AT3G56400;AT5G52760;AT5G22570;AT5G60900;AT1G01560;AT1G76110;AT3G52430;AT3G11820;AT4G04220;AT4G26070;AT4G04220;AT4G29810
196	GO:0006749	0.0196537	4.814	1.10036	4	13	glutathione metabolic process	AT1G69920;AT3G43800;AT4G39640;AT5G37830
197	GO:0046470	0.0196537	4.814	1.10036	4	13	phosphatidylcholine metabolic process	AT4G00240;AT4G11850;AT4G39180;AT4G11840
198	GO:0006968	0.0202723	21.6493	0.253929	2	3	cellular defense response	AT3G52400;AT3G11820
199	GO:0010185	0.0202723	21.6493	0.253929	2	3	regulation of cellular defense response	AT3G52400;AT3G11820
200	GO:0010618	0.0202723	21.6493	0.253929	2	3	aerenchyma formation	AT3G48090;AT3G52430
201	GO:0043091	0.0202723	21.6493	0.253929	2	3	L-arginine import	AT1G79900;AT4G21120
202	GO:0043092	0.0202723	21.6493	0.253929	2	3	L-amino acid import	AT1G79900;AT4G21120
203	GO:0046864	0.0202723	21.6493	0.253929	2	3	isoprenoid transport	AT1G15520;AT1G71960
204	GO:0046865	0.0202723	21.6493	0.253929	2	3	terpenoid transport	AT1G15520;AT1G71960
205	GO:0051176	0.0202723	21.6493	0.253929	2	3	positive regulation of sulfur metabolic process	AT1G67810;AT4G27260
206	GO:0080142	0.0202723	21.6493	0.253929	2	3	regulation of salicylic acid biosynthetic process	AT1G73805;AT5G26920
207	GO:0080168	0.0202723	21.6493	0.253929	2	3	abscisic acid transport	AT1G15520;AT1G71960
208	GO:0090467	0.0202723	21.6493	0.253929	2	3	arginine import	AT1G79900;AT4G21120
209	GO:0051234	0.0202879	1.14117	301.837	334	3566	establishment of localization	AT1G03550;AT1G05200;AT1G05880;AT1G07410;AT1G12100;AT1G22500;AT1G23940;AT1G24530;AT1G30840;AT1G30900;AT1G33600;AT1G49860;AT1G50400;AT1G53920;AT1G57630;AT1G61800;AT1G62500;AT1G64230;AT1G65730;AT1G67330;AT1G71140;AT1G72120;AT1G73780;AT1G74810;AT1G75040;AT1G78410;AT1G02360;AT1G02440;AT1G02450;AT1G03550;AT1G03660;AT1G03850;AT1G07000;AT1G08560;AT1G15520;AT1G22550;AT1G27940;AT1G28480;AT1G29440;AT1G31820…	AT1G03550;GLR3.4;ARI12;RABA2b;AT1G12100;AT1G22500;AT1G23940;AT1G24530;PUP4;VSR6;AT1G33600;GSTF14;AT1G50400;GLIP5;AT1G57630;GPT2;AT1G62500;UBC28;YSL7;AT1G67330;AT1G71140;AT1G72120;AT1G73780;BOR5;PR5;AT1G78410;AT1G02360;ARFD1A;NIMIN1;AT1G03550;AT1G03660;AT1G03850;EXO70B2;SYP111;PDR12;AT1G22550;PGP13;GRX480;AT1G29440;AT1G31820;AT1G51790;AT1G51850;AT1G51890;AT1G55790;AT1G60970;AT1G62510;ECI1;AT1G6733…
210	GO:0006498	0.0221642	1.35336	44.4376	58	525	N-terminal protein lipidation	AT1G33770;AT1G34420;AT1G65510;AT1G66860;AT1G02440;AT1G61310;AT1G63350;AT1G64700;AT2G15310;AT2G44230;AT2G19230;AT2G48150;AT3G28600;AT3G44670;AT3G10660;AT3G12820;AT3G44480;AT4G22710;AT4G03292;AT4G04490;AT4G04695;AT4G04710;AT4G23700;AT5G25880;AT5G38895;AT5G39420;AT5G40780;AT5G54480;AT5G19880;AT5G54095;AT5G55170;AT1G12290;AT1G12210;AT1G49050;AT1G01740;AT1G08050;AT1G14910;AT1G32340;AT1G67800;AT1G69270…
211	GO:0006499	0.0221642	1.35336	44.4376	58	525	N-terminal protein myristoylation	AT1G33770;AT1G34420;AT1G65510;AT1G66860;AT1G02440;AT1G61310;AT1G63350;AT1G64700;AT2G15310;AT2G44230;AT2G19230;AT2G48150;AT3G28600;AT3G44670;AT3G10660;AT3G12820;AT3G44480;AT4G22710;AT4G03292;AT4G04490;AT4G04695;AT4G04710;AT4G23700;AT5G25880;AT5G38895;AT5G39420;AT5G40780;AT5G54480;AT5G19880;AT5G54095;AT5G55170;AT1G12290;AT1G12210;AT1G49050;AT1G01740;AT1G08050;AT1G14910;AT1G32340;AT1G67800;AT1G69270…
212	GO:0018377	0.0221642	1.35336	44.4376	58	525	protein myristoylation	AT1G33770;AT1G34420;AT1G65510;AT1G66860;AT1G02440;AT1G61310;AT1G63350;AT1G64700;AT2G15310;AT2G44230;AT2G19230;AT2G48150;AT3G28600;AT3G44670;AT3G10660;AT3G12820;AT3G44480;AT4G22710;AT4G03292;AT4G04490;AT4G04695;AT4G04710;AT4G23700;AT5G25880;AT5G38895;AT5G39420;AT5G40780;AT5G54480;AT5G19880;AT5G54095;AT5G55170;AT1G12290;AT1G12210;AT1G49050;AT1G01740;AT1G08050;AT1G14910;AT1G32340;AT1G67800;AT1G69270…
213	GO:0031365	0.0253226	1.34162	44.7762	58	529	N-terminal protein amino acid modification	AT1G33770;AT1G34420;AT1G65510;AT1G66860;AT1G02440;AT1G61310;AT1G63350;AT1G64700;AT2G15310;AT2G44230;AT2G19230;AT2G48150;AT3G28600;AT3G44670;AT3G10660;AT3G12820;AT3G44480;AT4G22710;AT4G03292;AT4G04490;AT4G04695;AT4G04710;AT4G23700;AT5G25880;AT5G38895;AT5G39420;AT5G40780;AT5G54480;AT5G19880;AT5G54095;AT5G55170;AT1G12290;AT1G12210;AT1G49050;AT1G01740;AT1G08050;AT1G14910;AT1G32340;AT1G67800;AT1G69270…
214	GO:0015893	0.0254226	2.03389	6.43287	12	76	drug transport	AT1G71140;AT1G15520;AT2G04040;AT2G04070;AT2G04080;AT2G04090;AT2G04100;AT4G39030;AT2G29940;AT4G23030;AT4G22790;AT5G17700
215	GO:0016145	0.0257085	4.3324	1.185	4	14	S-glycoside catabolic process	AT1G54040;AT3G16390;AT3G16410;AT3G14210
216	GO:0019759	0.0257085	4.3324	1.185	4	14	glycosinolate catabolic process	AT1G54040;AT3G16390;AT3G16410;AT3G14210
217	GO:0019762	0.0257085	4.3324	1.185	4	14	glucosinolate catabolic process	AT1G54040;AT3G16390;AT3G16410;AT3G14210
218	GO:0006497	0.0258064	1.33643	45.7073	59	540	protein lipidation	AT1G33770;AT1G34420;AT1G65510;AT1G66860;AT1G02440;AT1G61310;AT1G63350;AT1G64700;AT2G15310;AT2G44230;AT2G19230;AT2G48150;AT3G28600;AT3G44670;AT3G10660;AT3G12820;AT3G44480;AT4G22710;AT4G03292;AT4G04490;AT4G04695;AT4G04710;AT4G23700;AT5G25880;AT5G38895;AT5G39420;AT5G40780;AT5G54480;AT5G19880;AT5G54095;AT5G55170;AT1G12290;AT1G12210;AT1G49050;AT1G01740;AT1G08050;AT1G14910;AT1G32340;AT1G67800;AT1G69270…
219	GO:0042158	0.0258064	1.33643	45.7073	59	540	lipoprotein biosynthetic process	AT1G33770;AT1G34420;AT1G65510;AT1G66860;AT1G02440;AT1G61310;AT1G63350;AT1G64700;AT2G15310;AT2G44230;AT2G19230;AT2G48150;AT3G28600;AT3G44670;AT3G10660;AT3G12820;AT3G44480;AT4G22710;AT4G03292;AT4G04490;AT4G04695;AT4G04710;AT4G23700;AT5G25880;AT5G38895;AT5G39420;AT5G40780;AT5G54480;AT5G19880;AT5G54095;AT5G55170;AT1G12290;AT1G12210;AT1G49050;AT1G01740;AT1G08050;AT1G14910;AT1G32340;AT1G67800;AT1G69270…
220	GO:0042157	0.0266536	1.33359	45.7919	59	541	lipoprotein metabolic process	AT1G33770;AT1G34420;AT1G65510;AT1G66860;AT1G02440;AT1G61310;AT1G63350;AT1G64700;AT2G15310;AT2G44230;AT2G19230;AT2G48150;AT3G28600;AT3G44670;AT3G10660;AT3G12820;AT3G44480;AT4G22710;AT4G03292;AT4G04490;AT4G04695;AT4G04710;AT4G23700;AT5G25880;AT5G38895;AT5G39420;AT5G40780;AT5G54480;AT5G19880;AT5G54095;AT5G55170;AT1G12290;AT1G12210;AT1G49050;AT1G01740;AT1G08050;AT1G14910;AT1G32340;AT1G67800;AT1G69270…
221	GO:0042493	0.0278778	2.00251	6.51752	12	77	response to drug	AT1G71140;AT1G15520;AT2G04040;AT2G04070;AT2G04080;AT2G04090;AT2G04100;AT4G39030;AT2G29940;AT4G23030;AT4G22790;AT5G17700
222	GO:0048445	0.029124	2.61601	3.04715	7	36	carpel morphogenesis	AT2G16020;AT2G20150;AT3G29140;AT3G42310;AT3G50540;AT3G46380;AT4G09840
223	GO:0009875	0.0295616	2.40882	3.7243	8	44	pollen-pistil interaction	AT1G61440;AT1G61490;AT1G61500;AT4G24580;AT1G11300;AT1G65790;AT1G61420;AT1G61430
224	GO:0052545	0.0311146	1.85232	8.12574	14	96	callose localization	AT1G05570;AT1G69120;AT3G25780;AT4G12020;AT5G42380;AT1G74360;AT3G02840;AT3G50930;AT4G39670;AT4G12120;AT4G18010;AT5G25930;AT5G37180;AT5G45110
225	GO:0044710	0.0318584	1.11069	431.68	465	5100	single-organism metabolic process	AT1G06620;AT1G06640;AT1G07410;AT1G08310;AT1G09480;AT1G11600;AT1G12010;AT1G17020;AT1G17610;AT1G24150;AT1G27160;AT1G30530;AT1G30900;AT1G31580;AT1G34420;AT1G34480;AT1G49860;AT1G50520;AT1G52400;AT1G53920;AT1G57630;AT1G58150;AT1G59670;AT1G61840;AT1G62620;AT1G64230;AT1G64800;AT1G65510;AT1G66860;AT1G67980;AT1G69500;AT1G75040;AT1G78410;AT1G02360;AT1G02450;AT1G04580;AT1G07000;AT1G07780;AT1G08560;AT1G10340…	AT1G06620;AT1G06640;RABA2b;AT1G08310;AT1G09480;CYP77B1;AT1G12010;SRG1;AT1G17610;FH4;AT1G27160;UGT78D1;VSR6;ECS1;AT1G34420;AT1G34480;GSTF14;CYP705A27;BGLU18;GLIP5;AT1G57630;AT1G58150;GSTU15;AT1G61840;AT1G62620;UBC28;AT1G64800;AT1G65510;AT1G66860;CCOAMT;CYP704B1;PR5;AT1G78410;AT1G02360;NIMIN1;AO4;EXO70B2;PAI1;SYP111;AT1G10340;AT1G13340;AT1G13470;CYP78A5;AT1G13750;MIOX1;PDR12;FMO1;AT1G20480;AT1G2638…
226	GO:0042439	0.0327633	3.93836	1.26965	4	15	ethanolamine-containing compound metabolic process	AT4G00240;AT4G11850;AT4G39180;AT4G11840
227	GO:0033037	0.0336366	1.82992	8.21038	14	97	polysaccharide localization	AT1G05570;AT1G69120;AT3G25780;AT4G12020;AT5G42380;AT1G74360;AT3G02840;AT3G50930;AT4G39670;AT4G12120;AT4G18010;AT5G25930;AT5G37180;AT5G45110
228	GO:0009737	0.0339418	1.29465	51.8016	65	612	response to abscisic acid stimulus	AT1G15080;AT1G17020;AT1G52400;AT1G15520;AT1G28480;AT1G32350;AT2G23120;AT2G46270;AT2G47190;AT2G02850;AT2G32030;AT3G25780;AT3G26830;AT3G28580;AT3G59220;AT3G01420;AT3G08720;AT3G22160;AT3G52400;AT3G53420;AT4G11890;AT4G13510;AT4G01870;AT4G04490;AT4G19120;AT5G38895;AT5G01560;AT5G26340;AT5G37500;AT5G46050;AT5G46790;AT1G01560;AT1G05630;AT1G08050;AT1G12420;AT1G52920;AT1G64610;AT1G69270;AT1G71960;AT2G16850…
229	GO:0016572	0.0344758	2.08511	5.24787	10	62	histone phosphorylation	AT3G17680;AT4G02800;AT5G44560;AT1G50240;AT1G63640;AT2G22610;AT2G45490;AT3G05330;AT4G39860;AT5G55520
230	GO:0006308	0.0344991	5.41378	0.761788	3	9	DNA catabolic process	AT4G21600;AT1G68290;AT5G26940
231	GO:0055114	0.0368803	1.1696	148.21	169	1751	oxidation-reduction process	AT1G06620;AT1G06640;AT1G11600;AT1G12010;AT1G17020;AT1G34480;AT1G50520;AT1G58150;AT1G61840;AT1G62620;AT1G64230;AT1G69500;AT1G04580;AT1G13710;AT1G14520;AT1G19250;AT1G26380;AT1G26390;AT1G32350;AT1G33720;AT1G37150;AT1G50190;AT1G55380;AT1G57750;AT1G58300;AT1G65520;AT1G69930;AT1G77330;AT2G02680;AT2G04680;AT2G21730;AT2G21830;AT2G21850;AT2G21910;AT2G34060;AT2G37820;AT2G12190;AT2G18660;AT2G23100;AT2G24190…	AT1G06620;AT1G06640;CYP77B1;AT1G12010;SRG1;AT1G34480;CYP705A27;AT1G58150;AT1G61840;AT1G62620;UBC28;CYP704B1;AO4;CYP78A5;MIOX1;FMO1;AT1G26380;AT1G26390;AOX1D;CYP76C6;HCS2;AT1G50190;AT1G55380;CYP96A15;HO4;ECI1;GSTU11;AT1G77330;AT2G02680;AT2G04680;CAD2;AT2G21830;AT2G21850;CYP96A5;AT2G34060;AT2G37820;AT2G12190;PNP-A;AT2G23100;AT2G24190;AT2G25450;ARD3;CYP705A9;AT2G27660;CYP710A1;AT2G40050;AT2G44380;CY…
232	GO:0052542	0.0379903	2.04567	5.33251	10	63	defense response by callose deposition	AT3G25780;AT5G42380;AT1G74360;AT3G02840;AT3G50930;AT4G39670;AT4G12120;AT4G18010;AT5G25930;AT5G45110
233	GO:0051179	0.0381976	1.11886	319.528	348	3775	localization	AT1G03550;AT1G04600;AT1G05200;AT1G05880;AT1G07410;AT1G12100;AT1G22500;AT1G23940;AT1G24530;AT1G30840;AT1G30900;AT1G33600;AT1G49860;AT1G50400;AT1G53920;AT1G57630;AT1G61800;AT1G62500;AT1G64230;AT1G65730;AT1G67330;AT1G71140;AT1G72120;AT1G73780;AT1G74810;AT1G75040;AT1G78410;AT1G02360;AT1G02440;AT1G02450;AT1G03550;AT1G03660;AT1G03850;AT1G05570;AT1G07000;AT1G08560;AT1G15520;AT1G22550;AT1G27940;AT1G28480…	AT1G03550;XIA;GLR3.4;ARI12;RABA2b;AT1G12100;AT1G22500;AT1G23940;AT1G24530;PUP4;VSR6;AT1G33600;GSTF14;AT1G50400;GLIP5;AT1G57630;GPT2;AT1G62500;UBC28;YSL7;AT1G67330;AT1G71140;AT1G72120;AT1G73780;BOR5;PR5;AT1G78410;AT1G02360;ARFD1A;NIMIN1;AT1G03550;AT1G03660;AT1G03850;CALS1;EXO70B2;SYP111;PDR12;AT1G22550;PGP13;GRX480;AT1G29440;AT1G31820;AT1G51790;AT1G51850;AT1G51890;AT1G55790;AT1G60970;AT1G62510;ECI…
234	GO:0006751	0.0382759	10.8241	0.338572	2	4	glutathione catabolic process	AT4G39640;AT5G37830
235	GO:0006788	0.0382759	10.8241	0.338572	2	4	heme oxidation	AT1G58300;AT1G69720
236	GO:0015807	0.0382759	10.8241	0.338572	2	4	L-amino acid transport	AT1G79900;AT4G21120
237	GO:0015809	0.0382759	10.8241	0.338572	2	4	arginine transport	AT1G79900;AT4G21120
238	GO:0043171	0.0382759	10.8241	0.338572	2	4	peptide catabolic process	AT4G39640;AT5G37830
239	GO:0048317	0.0382759	10.8241	0.338572	2	4	seed morphogenesis	AT1G02580;AT5G54650
240	GO:0090116	0.0382759	10.8241	0.338572	2	4	C-5 methylation of cytosine	AT4G08990;AT4G13610
241	GO:0043543	0.0397994	1.29777	46.8923	59	554	protein acylation	AT1G33770;AT1G34420;AT1G65510;AT1G66860;AT1G02440;AT1G61310;AT1G63350;AT1G64700;AT2G15310;AT2G44230;AT2G19230;AT2G48150;AT3G28600;AT3G44670;AT3G10660;AT3G12820;AT3G19040;AT3G44480;AT4G22710;AT4G03292;AT4G04490;AT4G04695;AT4G04710;AT4G23700;AT5G25880;AT5G38895;AT5G39420;AT5G40780;AT5G54480;AT5G19880;AT5G54095;AT5G55170;AT1G12290;AT1G12210;AT1G49050;AT1G01740;AT1G08050;AT1G14910;AT1G32340;AT1G67800…
242	GO:0001763	0.0401865	3.009	1.94679	5	23	morphogenesis of a branching structure	AT1G68800;AT3G15170;AT3G18550;AT4G13510;AT2G26170
243	GO:0010942	0.0408364	3.61	1.35429	4	16	positive regulation of cell death	AT3G48090;AT2G31880;AT3G20600;AT3G52430
244	GO:0048544	0.0430975	2.37043	3.30108	7	39	recognition of pollen	AT1G61440;AT1G61490;AT1G61500;AT1G11300;AT1G65790;AT1G61420;AT1G61430
245	GO:0015824	0.0463045	1.89313	6.26359	11	74	proline transport	AT1G53920;AT1G65520;AT2G27660;AT2G43620;AT3G47380;AT4G20860;AT4G35480;AT5G39090;AT5G47330;AT3G48570;AT4G21120
246	GO:0019748	0.0480557	1.22717	71.1002	85	840	secondary metabolic process	AT1G09480;AT1G17020;AT1G30530;AT1G49860;AT1G59670;AT1G67980;AT1G75040;AT1G04580;AT1G07000;AT1G20480;AT1G54040;AT1G65980;AT1G69930;AT2G05380;AT2G15480;AT2G21730;AT2G41380;AT2G25450;AT2G29460;AT2G29480;AT2G30770;AT2G34500;AT2G48150;AT3G13610;AT3G16390;AT3G16410;AT3G26830;AT3G09220;AT3G52400;AT3G56400;AT3G57260;AT4G10500;AT4G11210;AT4G20860;AT4G37990;AT4G39030;AT4G01870;AT4G23700;AT5G07130;AT5G23020…
247	GO:0008037	0.0485722	2.29849	3.38572	7	40	cell recognition	AT1G61440;AT1G61490;AT1G61500;AT1G11300;AT1G65790;AT1G61420;AT1G61430

## Sheet: GO BP for Col-0 DEGs
	GOBPID	Pvalue	OddsRatio	ExpCount	Count	Size	Term	inGenes	inGenesName
1	GO:0006952	0.000279401	1.65939	40.2555	63	1644	defense response	AT1G09665;AT1G16130;AT1G27180;AT1G31580;AT1G33600;AT1G35710;AT1G49860;AT1G52400;AT1G52410;AT1G56540;AT1G57630;AT1G57850;AT1G58848;AT1G72870;AT1G72890;AT1G72930;AT1G52030;AT1G52040;AT1G61310;AT1G63350;AT1G69550;AT2G26020;AT2G43530;AT2G43535;AT2G43620;AT3G44670;AT3G47380;AT3G16530;AT3G23120;AT3G25010;AT3G44480;AT3G48090;AT4G11210;AT4G12020;AT4G19500;AT4G20860;AT4G08870;AT4G09420;AT4G09430;AT4G12490…
2	GO:0007165	0.000480045	1.57796	47.6994	71	1948	signal transduction	AT1G05200;AT1G09665;AT1G15080;AT1G17250;AT1G17350;AT1G27180;AT1G33600;AT1G35710;AT1G49860;AT1G51270;AT1G52400;AT1G56540;AT1G57630;AT1G57850;AT1G60983;AT1G61840;AT1G72870;AT1G72890;AT1G72930;AT1G17240;AT1G27190;AT1G27940;AT1G69550;AT2G02680;AT2G15310;AT2G21830;AT2G21850;AT2G26020;AT2G34780;AT2G40670;AT2G02850;AT3G16020;AT3G16360;AT3G26200;AT3G44670;AT3G46370;AT3G47380;AT3G59220;AT3G23120;AT3G25010…
3	GO:0044700	0.000890428	1.5337	49.6338	72	2027	single organism signaling	AT1G05200;AT1G09665;AT1G15080;AT1G17250;AT1G17350;AT1G27180;AT1G33600;AT1G35710;AT1G49860;AT1G51270;AT1G52400;AT1G56540;AT1G57630;AT1G57850;AT1G60983;AT1G61840;AT1G72870;AT1G72890;AT1G72930;AT1G17240;AT1G27190;AT1G27940;AT1G69550;AT2G02680;AT2G15310;AT2G21830;AT2G21850;AT2G26020;AT2G34780;AT2G40670;AT2G02850;AT3G16020;AT3G16360;AT3G26200;AT3G44670;AT3G46370;AT3G47380;AT3G59220;AT3G23120;AT3G25010…
4	GO:0023052	0.000902357	1.53285	49.6583	72	2028	signaling	AT1G05200;AT1G09665;AT1G15080;AT1G17250;AT1G17350;AT1G27180;AT1G33600;AT1G35710;AT1G49860;AT1G51270;AT1G52400;AT1G56540;AT1G57630;AT1G57850;AT1G60983;AT1G61840;AT1G72870;AT1G72890;AT1G72930;AT1G17240;AT1G27190;AT1G27940;AT1G69550;AT2G02680;AT2G15310;AT2G21830;AT2G21850;AT2G26020;AT2G34780;AT2G40670;AT2G02850;AT3G16020;AT3G16360;AT3G26200;AT3G44670;AT3G46370;AT3G47380;AT3G59220;AT3G23120;AT3G25010…
5	GO:0007154	0.00415048	1.41334	57.9592	78	2367	cell communication	AT1G05200;AT1G09665;AT1G15080;AT1G17250;AT1G17350;AT1G27180;AT1G33600;AT1G35710;AT1G49860;AT1G51270;AT1G52400;AT1G56540;AT1G57630;AT1G57850;AT1G60983;AT1G61840;AT1G72870;AT1G72890;AT1G72930;AT1G17240;AT1G27190;AT1G27940;AT1G67600;AT1G69550;AT2G02680;AT2G04032;AT2G15310;AT2G21830;AT2G21850;AT2G26020;AT2G26820;AT2G34780;AT2G40670;AT2G02850;AT3G16020;AT3G16360;AT3G26200;AT3G44670;AT3G46370;AT3G47380…
6	GO:0016145	0.00434629	10.9167	0.342809	3	14	S-glycoside catabolic process	AT3G16390;AT3G16410;AT3G14210
7	GO:0019759	0.00434629	10.9167	0.342809	3	14	glycosinolate catabolic process	AT3G16390;AT3G16410;AT3G14210
8	GO:0019762	0.00434629	10.9167	0.342809	3	14	glucosinolate catabolic process	AT3G16390;AT3G16410;AT3G14210
9	GO:0080028	0.00569885	26.6481	0.122432	2	5	nitrile biosynthetic process	AT3G16390;AT3G16410
10	GO:0006591	0.00841005	19.9852	0.146918	2	6	ornithine metabolic process	AT2G39030;AT4G08870
11	GO:0015824	0.00954231	3.5416	1.81199	6	74	proline transport	AT1G65520;AT2G43620;AT3G47380;AT4G20860;AT5G39090;AT5G47330
12	GO:0015804	0.0114911	3.39151	1.88545	6	77	neutral amino acid transport	AT1G65520;AT2G43620;AT3G47380;AT4G20860;AT5G39090;AT5G47330
13	GO:0032890	0.0115841	15.9875	0.171404	2	7	regulation of organic acid transport	AT2G24762;AT5G24920
14	GO:0050898	0.0115841	15.9875	0.171404	2	7	nitrile metabolic process	AT3G16390;AT3G16410
15	GO:0051952	0.0115841	15.9875	0.171404	2	7	regulation of amine transport	AT2G24762;AT5G24920
16	GO:0051955	0.0115841	15.9875	0.171404	2	7	regulation of amino acid transport	AT2G24762;AT5G24920
17	GO:0080143	0.0115841	15.9875	0.171404	2	7	regulation of amino acid export	AT2G24762;AT5G24920
18	GO:0070417	0.0122091	7.06189	0.489727	3	20	cellular response to cold	AT1G05200;AT1G66280;AT3G62410
19	GO:0000304	0.0151967	13.3223	0.195891	2	8	response to singlet oxygen	AT3G48090;AT4G21830
20	GO:0019674	0.0151967	13.3223	0.195891	2	8	NAD metabolic process	AT5G23230;AT5G55810
21	GO:0032973	0.0151967	13.3223	0.195891	2	8	amino acid export	AT2G24762;AT5G24920
22	GO:0044273	0.0159087	6.31799	0.538699	3	22	sulfur compound catabolic process	AT3G16390;AT3G16410;AT3G14210
23	GO:0010048	0.0231387	2.60156	2.81593	7	115	vernalization response	AT1G77080;AT1G27940;AT2G04032;AT3G16020;AT4G09680;AT4G22950;AT5G62165
24	GO:0015837	0.0236455	9.99089	0.244863	2	10	amine transport	AT2G24762;AT5G24920
25	GO:0000966	0.0244863	Inf	0.0244863	1	1	RNA 5'-end processing	AT1G62670
26	GO:0009996	0.0244863	Inf	0.0244863	1	1	negative regulation of cell fate specification	AT1G79840
27	GO:0010034	0.0244863	Inf	0.0244863	1	1	response to acetate	AT1G05200
28	GO:0010062	0.0244863	Inf	0.0244863	1	1	negative regulation of trichoblast fate specification	AT1G79840
29	GO:0010454	0.0244863	Inf	0.0244863	1	1	negative regulation of cell fate commitment	AT1G79840
30	GO:0018149	0.0244863	Inf	0.0244863	1	1	peptide cross-linking	AT3G62410
31	GO:0018316	0.0244863	Inf	0.0244863	1	1	peptide cross-linking via L-cystine	AT3G62410
32	GO:0019549	0.0244863	Inf	0.0244863	1	1	glutamate catabolic process to succinate via succinate semialdehyde	AT1G64800
33	GO:0034484	0.0244863	Inf	0.0244863	1	1	raffinose catabolic process	AT3G57520
34	GO:0071260	0.0244863	Inf	0.0244863	1	1	cellular response to mechanical stimulus	AT1G05200
35	GO:0071311	0.0244863	Inf	0.0244863	1	1	cellular response to acetate	AT1G05200
36	GO:2000116	0.0244863	Inf	0.0244863	1	1	regulation of cysteine-type endopeptidase activity	AT4G19700
37	GO:2000117	0.0244863	Inf	0.0244863	1	1	negative regulation of cysteine-type endopeptidase activity	AT4G19700
38	GO:0019253	0.0284377	8.8804	0.26935	2	11	reductive pentose-phosphate cycle	AT1G58150;AT3G62410
39	GO:0019685	0.0335803	7.99201	0.293836	2	12	photosynthesis, dark reaction	AT1G58150;AT3G62410
40	GO:0016575	0.0390535	7.26515	0.318322	2	13	histone deacetylation	AT3G44490;AT3G44680
41	GO:0009736	0.0424906	2.74379	1.90993	5	78	cytokinin mediated signaling pathway	AT1G17350;AT2G40670;AT3G16360;AT4G02850;AT5G62920
42	GO:0071368	0.0424906	2.74379	1.90993	5	78	cellular response to cytokinin stimulus	AT1G17350;AT2G40670;AT3G16360;AT4G02850;AT5G62920
43	GO:0002215	0.0483741	39.9064	0.0489727	1	2	defense response to nematode	AT5G06720
44	GO:0006106	0.0483741	39.9064	0.0489727	1	2	fumarate metabolic process	AT5G50950
45	GO:0018874	0.0483741	39.9064	0.0489727	1	2	benzoate metabolic process	AT2G43820
46	GO:0045732	0.0483741	39.9064	0.0489727	1	2	positive regulation of protein catabolic process	AT1G32310
47	GO:0048730	0.0483741	39.9064	0.0489727	1	2	epidermis morphogenesis	AT5G23940
48	GO:0051409	0.0483741	39.9064	0.0489727	1	2	response to nitrosative stress	AT5G22300
49	GO:0051410	0.0483741	39.9064	0.0489727	1	2	detoxification of nitrogen compound	AT5G22300
50	GO:0071229	0.0483741	39.9064	0.0489727	1	2	cellular response to acid	AT1G05200
51	GO:0071230	0.0483741	39.9064	0.0489727	1	2	cellular response to amino acid stimulus	AT1G05200
52	GO:0071454	0.0483741	39.9064	0.0489727	1	2	cellular response to anoxia	AT3G62410
53	GO:0080187	0.0483741	39.9064	0.0489727	1	2	floral organ senescence	AT5G62165

## Sheet: GO BP for C24 DEGs
	GOBPID	Pvalue	OddsRatio	ExpCount	Count	Size	Term	inGenes	inGenesName
1	GO:0009627	6.35e-53	6.89494	26.608	128	442	systemic acquired resistance	AT1G17610;AT1G24150;AT1G30900;AT1G34420;AT1G75040;AT1G78410;AT1G02450;AT1G07000;AT1G10340;AT1G13470;AT1G13750;AT1G15520;AT1G19250;AT1G28480;AT1G73805;AT2G04450;AT2G13810;AT2G14560;AT2G34940;AT2G35980;AT2G14610;AT2G18660;AT2G26400;AT2G26560;AT2G30770;AT2G32680;AT2G39210;AT2G40750;AT2G45760;AT2G46400;AT3G09020;AT3G13950;AT3G26830;AT3G28510;AT3G01420;AT3G47480;AT3G48080;AT3G48640;AT3G52400;AT3G56400…
2	GO:0009697	5.88e-49	11.5053	12.4612	85	207	salicylic acid biosynthetic process	AT1G17610;AT1G24150;AT1G30900;AT1G34420;AT1G75040;AT1G78410;AT1G02450;AT1G07000;AT1G10340;AT1G13340;AT1G13470;AT1G15520;AT1G73805;AT2G04450;AT2G14560;AT2G34940;AT2G14610;AT2G26560;AT2G30770;AT2G40750;AT2G45760;AT2G46400;AT3G09020;AT3G13950;AT3G26830;AT3G47480;AT3G48080;AT3G48640;AT3G52400;AT3G56400;AT3G56710;AT3G57240;AT3G57260;AT4G10500;AT4G11890;AT4G23150;AT4G26120;AT4G38560;AT4G39030;AT4G39830…
3	GO:0009814	1.16e-47	5.69929	32.0259	134	532	defense response, incompatible interaction	AT1G17610;AT1G24150;AT1G30900;AT1G34420;AT1G75040;AT1G78410;AT1G02450;AT1G07000;AT1G10340;AT1G13470;AT1G13750;AT1G15520;AT1G19250;AT1G28480;AT1G73805;AT2G04450;AT2G13810;AT2G14560;AT2G17040;AT2G34940;AT2G35980;AT2G14610;AT2G18660;AT2G26400;AT2G26560;AT2G30770;AT2G32680;AT2G39210;AT2G40750;AT2G45760;AT2G46400;AT3G09020;AT3G13950;AT3G26830;AT3G28510;AT3G01420;AT3G47480;AT3G48080;AT3G48640;AT3G52400…
4	GO:0009696	1.9e-47	10.6004	13.2438	86	220	salicylic acid metabolic process	AT1G17610;AT1G24150;AT1G30900;AT1G34420;AT1G75040;AT1G78410;AT1G02450;AT1G07000;AT1G10340;AT1G13340;AT1G13470;AT1G15520;AT1G73805;AT2G04450;AT2G14560;AT2G34940;AT2G14610;AT2G26560;AT2G30770;AT2G40750;AT2G45760;AT2G46400;AT3G09020;AT3G13950;AT3G26830;AT3G47480;AT3G48080;AT3G48640;AT3G52400;AT3G56400;AT3G56710;AT3G57240;AT3G57260;AT4G10500;AT4G11890;AT4G23150;AT4G26120;AT4G38560;AT4G39030;AT4G39830…
5	GO:0042537	8.94e-45	8.86122	15.5314	90	258	benzene-containing compound metabolic process	AT1G17610;AT1G24150;AT1G30900;AT1G34420;AT1G75040;AT1G78410;AT1G02450;AT1G07000;AT1G10340;AT1G13340;AT1G13470;AT1G15520;AT1G73805;AT2G04450;AT2G14560;AT2G34940;AT2G14610;AT2G26560;AT2G30770;AT2G40750;AT2G45760;AT2G46400;AT3G09020;AT3G13950;AT3G26830;AT3G47480;AT3G48080;AT3G48640;AT3G52400;AT3G56400;AT3G56710;AT3G57240;AT3G57260;AT4G10500;AT4G11890;AT4G23150;AT4G26120;AT4G38560;AT4G39030;AT4G39830…
6	GO:0006952	4.69e-44	3.16615	98.9673	249	1644	defense response	AT1G17610;AT1G17615;AT1G23120;AT1G24150;AT1G30900;AT1G34420;AT1G65850;AT1G70690;AT1G75040;AT1G78410;AT1G02360;AT1G02450;AT1G03850;AT1G07000;AT1G10340;AT1G13340;AT1G13470;AT1G13750;AT1G15520;AT1G19250;AT1G28480;AT1G51790;AT1G51890;AT1G54040;AT1G70870;AT1G73260;AT1G73805;AT1G79680;AT2G04450;AT2G13810;AT2G14560;AT2G15220;AT2G17040;AT2G17060;AT2G29350;AT2G34940;AT2G35980;AT2G14610;AT2G18660;AT2G26400…
7	GO:0002376	1.78e-42	3.86241	58.8145	179	977	immune system process	AT1G17610;AT1G24150;AT1G30900;AT1G34420;AT1G75040;AT1G78410;AT1G02360;AT1G02450;AT1G07000;AT1G10340;AT1G13340;AT1G13470;AT1G13750;AT1G15520;AT1G19250;AT1G28480;AT1G51790;AT1G51890;AT1G73805;AT2G04450;AT2G13810;AT2G14560;AT2G17040;AT2G34940;AT2G35980;AT2G14610;AT2G18660;AT2G26400;AT2G26560;AT2G27660;AT2G30770;AT2G32030;AT2G32680;AT2G39210;AT2G40750;AT2G45760;AT2G46400;AT3G09020;AT3G13950;AT3G25780…
8	GO:0045087	1.9e-42	4.10193	51.711	166	859	innate immune response	AT1G17610;AT1G24150;AT1G30900;AT1G34420;AT1G75040;AT1G78410;AT1G02450;AT1G07000;AT1G10340;AT1G13340;AT1G13470;AT1G13750;AT1G15520;AT1G19250;AT1G28480;AT1G51890;AT1G73805;AT2G04450;AT2G13810;AT2G14560;AT2G17040;AT2G34940;AT2G35980;AT2G14610;AT2G18660;AT2G26400;AT2G26560;AT2G30770;AT2G32680;AT2G39210;AT2G40750;AT2G45760;AT2G46400;AT3G09020;AT3G13950;AT3G25780;AT3G26830;AT3G28510;AT3G01420;AT3G08720…
9	GO:0006955	4.89e-42	4.06558	52.0722	166	865	immune response	AT1G17610;AT1G24150;AT1G30900;AT1G34420;AT1G75040;AT1G78410;AT1G02450;AT1G07000;AT1G10340;AT1G13340;AT1G13470;AT1G13750;AT1G15520;AT1G19250;AT1G28480;AT1G51890;AT1G73805;AT2G04450;AT2G13810;AT2G14560;AT2G17040;AT2G34940;AT2G35980;AT2G14610;AT2G18660;AT2G26400;AT2G26560;AT2G30770;AT2G32680;AT2G39210;AT2G40750;AT2G45760;AT2G46400;AT3G09020;AT3G13950;AT3G25780;AT3G26830;AT3G28510;AT3G01420;AT3G08720…
10	GO:0071446	6.4e-35	5.90516	21.2503	93	353	cellular response to salicylic acid stimulus	AT1G17610;AT1G34420;AT1G75040;AT1G78410;AT1G02450;AT1G07000;AT1G13340;AT1G13470;AT1G15520;AT1G28480;AT1G51890;AT1G73805;AT2G04450;AT2G13810;AT2G14560;AT2G35980;AT2G14610;AT2G26400;AT2G26560;AT2G30770;AT2G32680;AT2G40750;AT3G09020;AT3G13950;AT3G25780;AT3G26830;AT3G28510;AT3G01420;AT3G08720;AT3G22160;AT3G47480;AT3G48640;AT3G52400;AT3G56400;AT3G56710;AT3G57240;AT3G57260;AT4G11890;AT4G13510;AT4G26120…
11	GO:0009751	1.12e-34	4.9724	28.2334	108	469	response to salicylic acid stimulus	AT1G17610;AT1G34420;AT1G75040;AT1G78410;AT1G02450;AT1G07000;AT1G13340;AT1G13470;AT1G15520;AT1G28480;AT1G51890;AT1G73260;AT1G73805;AT1G79680;AT2G04450;AT2G13810;AT2G14560;AT2G35980;AT2G47190;AT2G14610;AT2G26400;AT2G26560;AT2G30770;AT2G32680;AT2G40750;AT3G09020;AT3G13950;AT3G25780;AT3G26830;AT3G28510;AT3G01420;AT3G08720;AT3G22160;AT3G47480;AT3G48640;AT3G52400;AT3G56400;AT3G56710;AT3G57240;AT3G57260…
12	GO:0009607	1.15e-34	2.98538	85.0613	208	1413	response to biotic stimulus	AT1G17610;AT1G24150;AT1G30900;AT1G32960;AT1G34420;AT1G61800;AT1G70690;AT1G74080;AT1G75040;AT1G78410;AT1G02360;AT1G02450;AT1G03850;AT1G07000;AT1G10340;AT1G13470;AT1G13750;AT1G15520;AT1G19250;AT1G28480;AT1G51890;AT1G54040;AT1G73260;AT1G73805;AT1G79680;AT2G04450;AT2G13810;AT2G14560;AT2G15480;AT2G17040;AT2G29350;AT2G34940;AT2G35980;AT2G14610;AT2G18660;AT2G26400;AT2G26560;AT2G30770;AT2G32030;AT2G32680…
13	GO:0009863	2.31e-34	5.86007	21.1299	92	351	salicylic acid mediated signaling pathway	AT1G17610;AT1G34420;AT1G75040;AT1G78410;AT1G02450;AT1G07000;AT1G13340;AT1G13470;AT1G15520;AT1G28480;AT1G51890;AT1G73805;AT2G04450;AT2G13810;AT2G14560;AT2G35980;AT2G14610;AT2G26400;AT2G26560;AT2G30770;AT2G32680;AT2G40750;AT3G09020;AT3G13950;AT3G25780;AT3G26830;AT3G28510;AT3G08720;AT3G22160;AT3G47480;AT3G48640;AT3G52400;AT3G56400;AT3G56710;AT3G57240;AT3G57260;AT4G11890;AT4G13510;AT4G26120;AT4G39030…
14	GO:0051707	3.09e-34	2.96858	85.0011	207	1412	response to other organism	AT1G17610;AT1G24150;AT1G30900;AT1G34420;AT1G61800;AT1G70690;AT1G74080;AT1G75040;AT1G78410;AT1G02360;AT1G02450;AT1G03850;AT1G07000;AT1G10340;AT1G13470;AT1G13750;AT1G15520;AT1G19250;AT1G28480;AT1G51890;AT1G54040;AT1G73260;AT1G73805;AT1G79680;AT2G04450;AT2G13810;AT2G14560;AT2G15480;AT2G17040;AT2G29350;AT2G34940;AT2G35980;AT2G14610;AT2G18660;AT2G26400;AT2G26560;AT2G30770;AT2G32030;AT2G32680;AT2G39210…
15	GO:0031348	6.87e-33	6.67265	16.4344	79	273	negative regulation of defense response	AT1G17610;AT1G34420;AT1G75040;AT1G78410;AT1G02450;AT1G07000;AT1G13340;AT1G13470;AT1G15520;AT1G28480;AT1G73805;AT2G04450;AT2G14560;AT2G35980;AT2G14610;AT2G26560;AT2G30770;AT2G32680;AT2G40750;AT3G09020;AT3G13950;AT3G26830;AT3G47480;AT3G48640;AT3G52400;AT3G56400;AT3G56710;AT3G57240;AT3G57260;AT4G11890;AT4G26120;AT4G39030;AT4G04490;AT4G14365;AT4G23810;AT4G35180;AT5G24530;AT5G26920;AT5G52760;AT5G55450…
16	GO:0031347	1.27e-31	4.35963	32.4473	112	539	regulation of defense response	AT1G17610;AT1G34420;AT1G75040;AT1G78410;AT1G02450;AT1G07000;AT1G13340;AT1G13470;AT1G13750;AT1G15520;AT1G19250;AT1G28480;AT1G51890;AT1G73805;AT2G04450;AT2G14560;AT2G35980;AT2G14610;AT2G26560;AT2G30770;AT2G32680;AT2G40750;AT3G01080;AT3G09020;AT3G13950;AT3G25780;AT3G26830;AT3G08720;AT3G22160;AT3G47480;AT3G48640;AT3G52400;AT3G56400;AT3G56710;AT3G57240;AT3G57260;AT4G11890;AT4G13510;AT4G26120;AT4G39030…
17	GO:0080134	1.07e-30	4.2011	33.7115	113	560	regulation of response to stress	AT1G17610;AT1G34420;AT1G75040;AT1G78410;AT1G02450;AT1G07000;AT1G13340;AT1G13470;AT1G13750;AT1G15520;AT1G19250;AT1G28480;AT1G51890;AT1G73805;AT2G04450;AT2G14560;AT2G35980;AT2G14610;AT2G26560;AT2G30770;AT2G32680;AT2G40750;AT3G01080;AT3G09020;AT3G13950;AT3G25780;AT3G26830;AT3G08720;AT3G22160;AT3G47480;AT3G48640;AT3G52400;AT3G56400;AT3G56710;AT3G57240;AT3G57260;AT4G11890;AT4G13510;AT4G26120;AT4G39030…
18	GO:0009862	6.3e-30	6.59845	15.0498	72	250	systemic acquired resistance, salicylic acid mediated signaling pathway	AT1G17610;AT1G75040;AT1G78410;AT1G02450;AT1G07000;AT1G13470;AT1G15520;AT1G28480;AT1G73805;AT2G04450;AT2G13810;AT2G14560;AT2G35980;AT2G14610;AT2G26400;AT2G26560;AT2G30770;AT2G32680;AT2G40750;AT3G09020;AT3G13950;AT3G26830;AT3G28510;AT3G47480;AT3G48640;AT3G52400;AT3G56400;AT3G56710;AT3G57240;AT3G57260;AT4G11890;AT4G13510;AT4G39030;AT4G04490;AT4G14365;AT4G23810;AT5G09290;AT5G11920;AT5G24530;AT5G26920…
19	GO:0051704	2.42e-29	2.54701	108.479	231	1802	multi-organism process	AT1G17610;AT1G24150;AT1G30900;AT1G34420;AT1G61800;AT1G63530;AT1G70690;AT1G74080;AT1G75040;AT1G78410;AT1G02360;AT1G02450;AT1G03850;AT1G07000;AT1G10340;AT1G13470;AT1G13750;AT1G15520;AT1G19250;AT1G28480;AT1G51890;AT1G54040;AT1G61440;AT1G61490;AT1G61500;AT1G69120;AT1G73260;AT1G73805;AT1G79680;AT2G04450;AT2G13810;AT2G14560;AT2G15480;AT2G17040;AT2G29350;AT2G34940;AT2G35980;AT2G14610;AT2G18660;AT2G26400…
20	GO:0050832	4.46e-29	5.29778	20.7085	84	344	defense response to fungus	AT1G17610;AT1G75040;AT1G78410;AT1G02360;AT1G02450;AT1G03850;AT1G07000;AT1G13470;AT1G15520;AT1G19250;AT1G28480;AT1G51890;AT1G73805;AT2G04450;AT2G14560;AT2G35980;AT2G14610;AT2G26560;AT2G30770;AT2G32030;AT2G39210;AT2G40750;AT3G09020;AT3G11340;AT3G13950;AT3G25780;AT3G26830;AT3G47480;AT3G48640;AT3G52400;AT3G56400;AT3G56710;AT3G57240;AT3G57260;AT4G11890;AT4G39030;AT4G04490;AT4G14365;AT4G23810;AT4G37150…
21	GO:0014070	3.36e-27	3.23225	51.711	139	859	response to organic cyclic compound	AT1G17610;AT1G34420;AT1G75040;AT1G78410;AT1G02450;AT1G07000;AT1G13340;AT1G13470;AT1G15520;AT1G28480;AT1G51890;AT1G73260;AT1G73805;AT1G79680;AT2G04450;AT2G13810;AT2G14560;AT2G15480;AT2G35980;AT2G41380;AT2G47190;AT2G14610;AT2G26400;AT2G26560;AT2G29460;AT2G30770;AT2G32680;AT2G34500;AT2G40750;AT3G09020;AT3G13610;AT3G13950;AT3G25780;AT3G26830;AT3G28510;AT3G01420;AT3G08720;AT3G22160;AT3G47480;AT3G48640…
22	GO:0045088	7.81e-27	4.51968	25.103	90	417	regulation of innate immune response	AT1G17610;AT1G75040;AT1G78410;AT1G02450;AT1G07000;AT1G13470;AT1G15520;AT1G19250;AT1G28480;AT1G51890;AT1G73805;AT2G04450;AT2G14560;AT2G35980;AT2G14610;AT2G26560;AT2G30770;AT2G32680;AT2G40750;AT3G09020;AT3G13950;AT3G25780;AT3G26830;AT3G08720;AT3G22160;AT3G47480;AT3G48640;AT3G52400;AT3G56400;AT3G56710;AT3G57240;AT3G57260;AT4G11890;AT4G13510;AT4G39030;AT4G04490;AT4G14365;AT4G23810;AT5G13490;AT5G24530…
23	GO:0050776	1.13e-26	4.49179	25.2234	90	419	regulation of immune response	AT1G17610;AT1G75040;AT1G78410;AT1G02450;AT1G07000;AT1G13470;AT1G15520;AT1G19250;AT1G28480;AT1G51890;AT1G73805;AT2G04450;AT2G14560;AT2G35980;AT2G14610;AT2G26560;AT2G30770;AT2G32680;AT2G40750;AT3G09020;AT3G13950;AT3G25780;AT3G26830;AT3G08720;AT3G22160;AT3G47480;AT3G48640;AT3G52400;AT3G56400;AT3G56710;AT3G57240;AT3G57260;AT4G11890;AT4G13510;AT4G39030;AT4G04490;AT4G14365;AT4G23810;AT5G13490;AT5G24530…
24	GO:0002682	1.95e-26	4.45059	25.404	90	422	regulation of immune system process	AT1G17610;AT1G75040;AT1G78410;AT1G02450;AT1G07000;AT1G13470;AT1G15520;AT1G19250;AT1G28480;AT1G51890;AT1G73805;AT2G04450;AT2G14560;AT2G35980;AT2G14610;AT2G26560;AT2G30770;AT2G32680;AT2G40750;AT3G09020;AT3G13950;AT3G25780;AT3G26830;AT3G08720;AT3G22160;AT3G47480;AT3G48640;AT3G52400;AT3G56400;AT3G56710;AT3G57240;AT3G57260;AT4G11890;AT4G13510;AT4G39030;AT4G04490;AT4G14365;AT4G23810;AT5G13490;AT5G24530…
25	GO:0012501	1.18e-25	4.23242	27.0294	92	449	programmed cell death	AT1G75040;AT1G78410;AT1G02450;AT1G07000;AT1G15520;AT1G16420;AT1G19250;AT1G28480;AT1G51890;AT1G73260;AT1G73805;AT2G04450;AT2G14560;AT2G35980;AT2G14610;AT2G26560;AT2G30770;AT2G32680;AT2G40750;AT3G09020;AT3G13610;AT3G13950;AT3G25780;AT3G26830;AT3G08720;AT3G22160;AT3G47480;AT3G52400;AT3G56400;AT3G57240;AT3G57260;AT4G13510;AT4G37990;AT4G39030;AT4G04490;AT4G14365;AT4G23810;AT4G25110;AT5G13490;AT5G24530…
26	GO:0048585	3.51e-25	4.67797	21.9125	81	364	negative regulation of response to stimulus	AT1G17610;AT1G34420;AT1G75040;AT1G78410;AT1G02450;AT1G07000;AT1G13340;AT1G13470;AT1G15520;AT1G28480;AT1G73805;AT2G04450;AT2G14560;AT2G35980;AT2G14610;AT2G26560;AT2G30770;AT2G32680;AT2G40750;AT3G09020;AT3G13950;AT3G26830;AT3G47480;AT3G48640;AT3G52400;AT3G56400;AT3G56710;AT3G57240;AT3G57260;AT4G11890;AT4G26120;AT4G39030;AT4G04490;AT4G14365;AT4G23810;AT4G24580;AT4G35180;AT5G24530;AT5G26920;AT5G52760…
27	GO:0007243	3.88e-25	6.27984	13.3642	62	222	intracellular protein kinase cascade	AT1G17610;AT1G75040;AT1G78410;AT1G02450;AT1G13470;AT1G15520;AT1G28480;AT1G73805;AT2G04450;AT2G14560;AT2G17040;AT2G35980;AT2G14610;AT2G26560;AT2G30770;AT2G32680;AT2G40750;AT3G09020;AT3G13950;AT3G26830;AT3G47480;AT3G48640;AT3G52400;AT3G56400;AT3G56710;AT3G57240;AT3G57260;AT4G11890;AT4G39030;AT4G04490;AT4G14365;AT4G23320;AT4G23810;AT5G24530;AT5G26920;AT5G52760;AT5G55450;AT5G10760;AT5G22570;AT5G54610…
28	GO:0033554	7.93e-25	2.54971	87.1683	189	1448	cellular response to stress	AT1G05880;AT1G08310;AT1G13330;AT1G30900;AT1G35530;AT1G75390;AT1G75040;AT1G78410;AT1G02450;AT1G07000;AT1G15520;AT1G16420;AT1G19250;AT1G26380;AT1G28480;AT1G51890;AT1G53620;AT1G60970;AT1G69930;AT1G73805;AT1G77330;AT2G04450;AT2G14560;AT2G23270;AT2G28160;AT2G35980;AT2G46270;AT2G47190;AT2G14610;AT2G18660;AT2G26560;AT2G28960;AT2G30770;AT2G32680;AT2G34500;AT2G39210;AT2G40750;AT2G45570;AT3G09020;AT3G13610…
29	GO:0071407	1.28e-24	3.79373	32.1463	100	534	cellular response to organic cyclic compound	AT1G17610;AT1G34420;AT1G75040;AT1G78410;AT1G02450;AT1G07000;AT1G13340;AT1G13470;AT1G15520;AT1G28480;AT1G51890;AT1G73805;AT2G04450;AT2G13810;AT2G14560;AT2G35980;AT2G14610;AT2G26400;AT2G26560;AT2G30770;AT2G32680;AT2G40750;AT3G09020;AT3G13950;AT3G25780;AT3G26830;AT3G28510;AT3G01420;AT3G08720;AT3G22160;AT3G47480;AT3G48640;AT3G52400;AT3G56400;AT3G56710;AT3G57240;AT3G57260;AT4G11890;AT4G13510;AT4G26120…
30	GO:0000165	1.43e-24	6.21312	13.2438	61	220	MAPK cascade	AT1G17610;AT1G75040;AT1G78410;AT1G02450;AT1G13470;AT1G15520;AT1G28480;AT1G73805;AT2G04450;AT2G14560;AT2G17040;AT2G35980;AT2G14610;AT2G26560;AT2G30770;AT2G32680;AT2G40750;AT3G09020;AT3G13950;AT3G26830;AT3G47480;AT3G48640;AT3G52400;AT3G56400;AT3G56710;AT3G57240;AT3G57260;AT4G11890;AT4G39030;AT4G04490;AT4G14365;AT4G23320;AT4G23810;AT5G24530;AT5G26920;AT5G52760;AT5G55450;AT5G10760;AT5G22570;AT5G54610…
31	GO:0006612	2.68e-24	4.45219	23.0563	82	383	protein targeting to membrane	AT1G75040;AT1G78410;AT1G02450;AT1G07000;AT1G15520;AT1G28480;AT1G51890;AT1G67650;AT1G73805;AT2G04450;AT2G14560;AT2G35980;AT2G14610;AT2G26560;AT2G30770;AT2G32680;AT2G40750;AT3G09020;AT3G13950;AT3G25780;AT3G26830;AT3G08720;AT3G22160;AT3G47480;AT3G52400;AT3G56400;AT3G57240;AT3G57260;AT4G13510;AT4G39030;AT4G04490;AT4G14365;AT4G23810;AT5G13490;AT5G24530;AT5G26920;AT5G38710;AT5G40780;AT5G52760;AT5G55450…
32	GO:0009626	2.88e-24	4.3478	24.0796	84	400	plant-type hypersensitive response	AT1G75040;AT1G78410;AT1G02450;AT1G07000;AT1G15520;AT1G19250;AT1G28480;AT1G51890;AT1G73805;AT2G04450;AT2G14560;AT2G35980;AT2G14610;AT2G26560;AT2G30770;AT2G32680;AT2G40750;AT3G09020;AT3G13950;AT3G25780;AT3G26830;AT3G08720;AT3G22160;AT3G47480;AT3G52400;AT3G56400;AT3G57240;AT3G57260;AT4G13510;AT4G37990;AT4G39030;AT4G04490;AT4G14365;AT4G23810;AT5G13490;AT5G24530;AT5G26920;AT5G38710;AT5G40780;AT5G52760…
33	GO:0034050	3.44e-24	4.33389	24.1398	84	401	host programmed cell death induced by symbiont	AT1G75040;AT1G78410;AT1G02450;AT1G07000;AT1G15520;AT1G19250;AT1G28480;AT1G51890;AT1G73805;AT2G04450;AT2G14560;AT2G35980;AT2G14610;AT2G26560;AT2G30770;AT2G32680;AT2G40750;AT3G09020;AT3G13950;AT3G25780;AT3G26830;AT3G08720;AT3G22160;AT3G47480;AT3G52400;AT3G56400;AT3G57240;AT3G57260;AT4G13510;AT4G37990;AT4G39030;AT4G04490;AT4G14365;AT4G23810;AT5G13490;AT5G24530;AT5G26920;AT5G38710;AT5G40780;AT5G52760…
34	GO:0043069	3.65e-24	7.30714	10.2338	53	170	negative regulation of programmed cell death	AT1G75040;AT1G07000;AT1G15520;AT1G28480;AT1G51890;AT2G14560;AT2G35980;AT2G26560;AT3G13950;AT3G25780;AT3G22160;AT3G47480;AT3G52400;AT3G56400;AT3G57260;AT4G13510;AT4G04490;AT4G14365;AT4G25110;AT5G13490;AT5G26920;AT5G40780;AT5G52760;AT5G22570;AT5G54610;AT1G01560;AT1G21250;AT1G72900;AT1G74360;AT1G74710;AT1G08050;AT1G64610;AT1G69270;AT2G25000;AT3G02840;AT3G09830;AT3G20410;AT3G52430;AT3G63010;AT3G11820…
35	GO:0008219	4.1e-24	3.88197	29.919	95	497	cell death	AT1G75040;AT1G78410;AT1G02450;AT1G07000;AT1G15520;AT1G16420;AT1G19250;AT1G28480;AT1G51890;AT1G73260;AT1G73805;AT2G04450;AT2G14560;AT2G35980;AT2G14610;AT2G26560;AT2G30770;AT2G32680;AT2G40750;AT3G09020;AT3G13610;AT3G13950;AT3G25780;AT3G26830;AT3G01420;AT3G08720;AT3G22160;AT3G47480;AT3G52400;AT3G56400;AT3G57240;AT3G57260;AT4G13510;AT4G37990;AT4G39030;AT4G04490;AT4G14365;AT4G23810;AT4G25110;AT5G13490…
36	GO:0016265	4.1e-24	3.88197	29.919	95	497	death	AT1G75040;AT1G78410;AT1G02450;AT1G07000;AT1G15520;AT1G16420;AT1G19250;AT1G28480;AT1G51890;AT1G73260;AT1G73805;AT2G04450;AT2G14560;AT2G35980;AT2G14610;AT2G26560;AT2G30770;AT2G32680;AT2G40750;AT3G09020;AT3G13610;AT3G13950;AT3G25780;AT3G26830;AT3G01420;AT3G08720;AT3G22160;AT3G47480;AT3G52400;AT3G56400;AT3G57240;AT3G57260;AT4G13510;AT4G37990;AT4G39030;AT4G04490;AT4G14365;AT4G23810;AT4G25110;AT5G13490…
37	GO:0010941	5.82e-24	4.29267	24.3204	84	404	regulation of cell death	AT1G75040;AT1G78410;AT1G02450;AT1G07000;AT1G15520;AT1G28480;AT1G51890;AT1G73805;AT2G04450;AT2G14560;AT2G35980;AT2G14610;AT2G26560;AT2G30770;AT2G32680;AT2G40750;AT3G09020;AT3G13950;AT3G25780;AT3G26830;AT3G08720;AT3G22160;AT3G47480;AT3G52400;AT3G56400;AT3G57240;AT3G57260;AT4G13510;AT4G39030;AT4G04490;AT4G14365;AT4G23810;AT4G25110;AT5G13490;AT5G24530;AT5G26920;AT5G38710;AT5G40780;AT5G52760;AT5G55450…
38	GO:0010363	6.06e-24	4.48821	22.3339	80	371	regulation of plant-type hypersensitive response	AT1G75040;AT1G78410;AT1G02450;AT1G07000;AT1G15520;AT1G28480;AT1G51890;AT1G73805;AT2G04450;AT2G14560;AT2G35980;AT2G14610;AT2G26560;AT2G30770;AT2G32680;AT2G40750;AT3G09020;AT3G13950;AT3G25780;AT3G26830;AT3G08720;AT3G22160;AT3G47480;AT3G52400;AT3G56400;AT3G57240;AT3G57260;AT4G13510;AT4G39030;AT4G04490;AT4G14365;AT4G23810;AT5G13490;AT5G24530;AT5G26920;AT5G38710;AT5G40780;AT5G52760;AT5G55450;AT5G22570…
39	GO:0010310	9.05e-24	6.77811	11.197	55	186	regulation of hydrogen peroxide metabolic process	AT1G17610;AT1G75040;AT1G78410;AT1G02450;AT1G13470;AT1G15520;AT1G28480;AT1G73805;AT2G04450;AT2G14560;AT2G35980;AT2G14610;AT2G26400;AT2G26560;AT2G30770;AT2G32680;AT2G40750;AT3G09020;AT3G13950;AT3G26830;AT3G28510;AT3G47480;AT3G48640;AT3G52400;AT3G56400;AT3G56710;AT3G57240;AT3G57260;AT4G11890;AT4G13510;AT4G39030;AT4G14365;AT4G23810;AT5G09290;AT5G11920;AT5G24530;AT5G26920;AT5G52760;AT5G55450;AT5G22570…
40	GO:0060548	9.24e-24	7.12349	10.4144	53	173	negative regulation of cell death	AT1G75040;AT1G07000;AT1G15520;AT1G28480;AT1G51890;AT2G14560;AT2G35980;AT2G26560;AT3G13950;AT3G25780;AT3G22160;AT3G47480;AT3G52400;AT3G56400;AT3G57260;AT4G13510;AT4G04490;AT4G14365;AT4G25110;AT5G13490;AT5G26920;AT5G40780;AT5G52760;AT5G22570;AT5G54610;AT1G01560;AT1G21250;AT1G72900;AT1G74360;AT1G74710;AT1G08050;AT1G64610;AT1G69270;AT2G25000;AT3G02840;AT3G09830;AT3G20410;AT3G52430;AT3G63010;AT3G11820…
41	GO:0034976	9.56e-24	4.61535	21.0095	77	349	response to endoplasmic reticulum stress	AT1G30900;AT1G75390;AT1G75040;AT1G07000;AT1G28480;AT1G60970;AT2G04450;AT2G46270;AT2G14610;AT2G18660;AT2G32680;AT2G39210;AT3G08720;AT3G47480;AT3G51890;AT3G52400;AT3G57240;AT3G57260;AT4G00700;AT4G23150;AT4G39030;AT4G04490;AT4G14365;AT4G18430;AT4G22530;AT4G35180;AT5G24530;AT5G40780;AT5G42010;AT5G52740;AT5G10760;AT5G22570;AT5G42380;AT1G01560;AT1G07390;AT1G16670;AT1G74360;AT1G74710;AT1G08050;AT1G08450…
42	GO:0080135	9.99e-24	4.39461	22.9961	81	382	regulation of cellular response to stress	AT1G75040;AT1G78410;AT1G02450;AT1G07000;AT1G15520;AT1G28480;AT1G51890;AT1G73805;AT2G04450;AT2G14560;AT2G35980;AT2G14610;AT2G26560;AT2G30770;AT2G32680;AT2G40750;AT3G09020;AT3G13950;AT3G25780;AT3G26830;AT3G08720;AT3G22160;AT3G47480;AT3G52400;AT3G56400;AT3G57240;AT3G57260;AT4G13510;AT4G39030;AT4G04490;AT4G14365;AT4G23810;AT5G13490;AT5G24530;AT5G26920;AT5G38710;AT5G40780;AT5G52760;AT5G55450;AT5G22570…
43	GO:0048583	1.39e-23	3.18441	45.2095	121	751	regulation of response to stimulus	AT1G17610;AT1G34420;AT1G75040;AT1G78410;AT1G02450;AT1G07000;AT1G13340;AT1G13470;AT1G13750;AT1G15520;AT1G19250;AT1G28480;AT1G51890;AT1G73805;AT2G04450;AT2G14560;AT2G35980;AT2G14610;AT2G26560;AT2G30770;AT2G32680;AT2G40750;AT3G01080;AT3G09020;AT3G13950;AT3G25780;AT3G26830;AT3G08720;AT3G22160;AT3G47480;AT3G48640;AT3G52400;AT3G56400;AT3G56710;AT3G57240;AT3G57260;AT4G11890;AT4G13510;AT4G26120;AT4G39030…
44	GO:0009595	2.02e-23	10.432	6.26071	41	104	detection of biotic stimulus	AT1G32960;AT1G75040;AT1G78410;AT1G02450;AT1G10340;AT1G15520;AT1G73805;AT2G04450;AT2G14560;AT2G14610;AT2G26560;AT2G30770;AT2G40750;AT3G09010;AT3G09020;AT3G26830;AT3G47480;AT3G52400;AT3G56400;AT3G57240;AT3G57260;AT4G11890;AT4G39030;AT4G14365;AT4G23810;AT5G24530;AT5G26920;AT5G52760;AT5G55450;AT5G22570;AT1G01560;AT1G74360;AT1G74710;AT2G25000;AT2G35650;AT3G52430;AT3G11820;AT3G11840;AT4G26070;AT4G03450…
45	GO:0009620	2.16e-23	3.80925	30.0394	94	499	response to fungus	AT1G17610;AT1G75040;AT1G78410;AT1G02360;AT1G02450;AT1G03850;AT1G07000;AT1G13470;AT1G15520;AT1G19250;AT1G28480;AT1G51890;AT1G73805;AT1G79680;AT2G04450;AT2G14560;AT2G35980;AT2G14610;AT2G26560;AT2G30770;AT2G32030;AT2G39210;AT2G40750;AT3G09020;AT3G11340;AT3G13950;AT3G20200;AT3G25780;AT3G26830;AT3G19260;AT3G47480;AT3G48640;AT3G52400;AT3G56400;AT3G56710;AT3G57240;AT3G57260;AT4G11890;AT4G39030;AT4G04490…
46	GO:0043067	3.21e-23	4.25159	23.899	82	397	regulation of programmed cell death	AT1G75040;AT1G78410;AT1G02450;AT1G07000;AT1G15520;AT1G28480;AT1G51890;AT1G73805;AT2G04450;AT2G14560;AT2G35980;AT2G14610;AT2G26560;AT2G30770;AT2G32680;AT2G40750;AT3G09020;AT3G13950;AT3G25780;AT3G26830;AT3G08720;AT3G22160;AT3G47480;AT3G52400;AT3G56400;AT3G57240;AT3G57260;AT4G13510;AT4G39030;AT4G04490;AT4G14365;AT4G23810;AT4G25110;AT5G13490;AT5G24530;AT5G26920;AT5G38710;AT5G40780;AT5G52760;AT5G55450…
47	GO:0010243	6.01e-23	4.03037	26.1866	86	435	response to organic nitrogen	AT1G75040;AT1G78410;AT1G02360;AT1G02450;AT1G07000;AT1G15520;AT1G51790;AT1G73805;AT2G04450;AT2G14560;AT2G17040;AT2G35980;AT2G14610;AT2G25460;AT2G26560;AT2G27660;AT2G30770;AT2G32030;AT2G33580;AT2G40750;AT2G46400;AT3G09010;AT3G09020;AT3G26830;AT3G08720;AT3G13790;AT3G44350;AT3G46080;AT3G46090;AT3G47480;AT3G52400;AT3G56400;AT3G57240;AT3G57260;AT4G26120;AT4G39030;AT4G04490;AT4G14365;AT4G22530;AT4G23810…
[truncated: 257 more rows]
