# Supplementary material for: Transcriptomic and Metabolomic Analysis of a Pseudomonas-Resistant versus a Susceptible Arabidopsis Accession
Source: Int J Mol Sci. 2022 Oct 11;23(20):12087. doi: 10.3390/ijms232012087 (PMC9603445; doi:10.3390/ijms232012087)
Supplement: Supplementary file 1 [file ijms-23-12087-s001.zip › Supplemental Table S5.xlsx]

## Sheet: 1 - Comparison
Locus	Main experiment	Axenic experiment	Difference	Opposite sign?	Opposite sign & threshold 0.58?	Opposite sign & threshold 1?
AT1G24996	-7.93824	-8.31488	0.376646	Same	Same	Same
AY058160	-7.28703	-6.58214	0.704889	Same	Same	Same
AT5G49640	-6.97501	-7.26354	0.28853	Same	Same	Same
AT1G31580	-6.75889	-7.3933	0.634412	Same	Same	Same
AT3G50480	-6.66907	-6.45869	0.210378	Same	Same	Same
AT5G46510	-6.3422	-5.45078	0.891415	Same	Same	Same
AT3G47680	-6.33155	-5.80821	0.523346	Same	Same	Same
AT4G16860	-6.08935	-6.14784	0.058486	Same	Same	Same
AT5G50562	-5.96101	-5.84628	0.114727	Same	Same	Same
AT5G42825	-5.53851	-4.68769	0.850816	Same	Same	Same
AT3G30720	-5.44868	-4.31495	1.13373	Same	Same	Same
AT4G19500	-5.28706	-4.2447	1.04236	Same	Same	Same
AT5G66052	-5.17231	-2.07527	3.09703	Same	Same	Same
AT3G44798	-5.14148	-5.38273	0.241247	Same	Same	Same
AT5G49440	-5.10237	-4.15093	0.951442	Same	Same	Same
AT3G16530	-5.08598	-4.15913	0.926855	Same	Same	Same
AT5G28919	-5.04042	-4.98208	0.0583418	Same	Same	Same
AT5G10610	-5.00879	-5.04835	0.0395575	Same	Same	Same
AT3G47675	-4.95123	-4.67946	0.271765	Same	Same	Same
AT5G47590	-4.8763	-4.00343	0.872871	Same	Same	Same
AT5G36930	-4.86424	-3.44764	1.41661	Same	Same	Same
AT2G23985	-4.83751	-3.66278	1.17473	Same	Same	Same
AT5G22700	-4.81557	-5.60469	0.789128	Same	Same	Same
AT3G23120	-4.80117	-1.0907	3.71047	Same	Same	Same
AT1G21130	-4.76438	-5.76982	1.00544	Same	Same	Same
AT4G20480	-4.75169	-5.32944	0.577749	Same	Same	Same
AT1G27540	-4.74171	-4.1808	0.560909	Same	Same	Same
AT1G80980	-4.71722	-4.44056	0.276658	Same	Same	Same
AT4G07825	-4.66974	-5.49262	0.822873	Same	Same	Same
AT5G23411	-4.55494	-2.73474	1.8202	Same	Same	Same
AT3G52530	-4.51325	-5.09883	0.585586	Same	Same	Same
AT5G18080	-4.50441	-4.42117	0.0832398	Same	Same	Same
AT2G22482	-4.41367	-3.68059	0.733084	Same	Same	Same
AT3G46370	-4.38663	-4.25878	0.127847	Same	Same	Same
AT4G08870	-4.33565	-5.64708	1.31143	Same	Same	Same
AT5G46500	-4.30012	-3.25342	1.0467	Same	Same	Same
AT4G34881	-4.29704	-4.07112	0.225913	Same	Same	Same
AT1G76960	-4.28685	-2.29919	1.98765	Same	Same	Same
AT4G12020	-4.17997	-4.33072	0.150751	Same	Same	Same
AT2G43920	-4.17437	-3.70297	0.471405	Same	Same	Same
AT2G07042	-4.10953	-3.02175	1.08778	Same	Same	Same
AT1G61310	-4.02892	-3.95214	0.0767828	Same	Same	Same
AT2G11271	-4.01854	-4.17118	0.152647	Same	Same	Same
AT5G36350	-4.01133	0.693419	4.70475	Opposite	Opposite	Same
AT3G62410	-3.95276	-2.24199	1.71077	Same	Same	Same
AT5G43403	-3.92004	-4.25312	0.333076	Same	Same	Same
AT1G19080	-3.89883	-4.43054	0.531705	Same	Same	Same
AT1G57630	-3.89094	-1.88688	2.00406	Same	Same	Same
AT1G57860	-3.85882	-4.46239	0.603577	Same	Same	Same
AT1G62510	-3.83625	-0.20724	3.62901	Same	Same	Same
AT1G77080	-3.7515	-2.91378	0.83772	Same	Same	Same
AT4G02540	-3.72449	-3.27086	0.453635	Same	Same	Same
AT1G51270	-3.70128	-2.54868	1.1526	Same	Same	Same
AT5G66052	-3.69187	-2.07527	1.61659	Same	Same	Same
AT2G12190	-3.68185	-3.83732	0.155474	Same	Same	Same
AT1G52270	-3.65756	-3.29697	0.360593	Same	Same	Same
AT1G25141	-3.65686	-2.66721	0.989645	Same	Same	Same
AT1G06640	-3.65157	-3.027	0.624571	Same	Same	Same
AT4G07950	-3.6398	-2.03538	1.60442	Same	Same	Same
AT5G23230	-3.63819	-4.02937	0.391173	Same	Same	Same
AT1G58848	-3.60846	-3.3788	0.229658	Same	Same	Same
AT1G62910	-3.59232	-2.03566	1.55666	Same	Same	Same
AT1G52040	-3.58874	-2.40037	1.18837	Same	Same	Same
AT1G58150	-3.50838	-2.4824	1.02598	Same	Same	Same
AT2G12170	-3.49762	-1.60957	1.88805	Same	Same	Same
AT1G63350	-3.45383	-2.56515	0.888682	Same	Same	Same
AT3G28170	-3.44381	-5.46799	2.02417	Same	Same	Same
AT1G23940	-3.42169	-1.23629	2.18539	Same	Same	Same
AT1G12010	-3.42164	-1.57516	1.84648	Same	Same	Same
AT1G31835	-3.41233	-2.55892	0.853414	Same	Same	Same
AT1G29440	-3.40956	-2.64973	0.759832	Same	Same	Same
AT2G43530	-3.35411	-3.34842	0.0056935	Same	Same	Same
AT2G09795	-3.33497	-2.89025	0.44472	Same	Same	Same
AT3G26200	-3.33226	-2.43777	0.894495	Same	Same	Same
AT2G13800	-3.32407	-2.35878	0.965287	Same	Same	Same
AT3G25010	-3.31009	-3.97341	0.663317	Same	Same	Same
AT3G29644	-3.2837	-2.41172	0.871978	Same	Same	Same
AT3G44860	-3.28237	-3.73847	0.4561	Same	Same	Same
AT5G28442	-3.25072	-3.34297	0.0922478	Same	Same	Same
AT1G65985	-3.24921	-4.57527	1.32606	Same	Same	Same
AT4G08410	-3.2467	-2.63377	0.612938	Same	Same	Same
AT4G15990	-3.23173	-1.95477	1.27696	Same	Same	Same
AT1G15885	-3.22087	-2.84213	0.37874	Same	Same	Same
AT5G39160	-3.21647	-3.08013	0.136339	Same	Same	Same
AT3G29140	-3.18071	-2.48158	0.699126	Same	Same	Same
AT3G29000	-3.13601	-3.13234	0.0036685	Same	Same	Same
AT4G09430	-3.12877	-0.800295	2.32847	Same	Same	Same
AT5G43050	-3.11158	-2.35471	0.756873	Same	Same	Same
AT5G39190	-3.03758	-2.9733	0.0642722	Same	Same	Same
AT4G03500	-3.03338	-2.9324	0.100981	Same	Same	Same
AT4G11360	-3.01792	-2.79903	0.218893	Same	Same	Same
AT4G02000	-3.013	-3.26252	0.249521	Same	Same	Same
AT5G20450	-2.99384	-3.29977	0.305925	Same	Same	Same
AT3G28290	-2.98432	-3.37371	0.389392	Same	Same	Same
AT5G27110	-2.97574	-1.78637	1.18937	Same	Same	Same
AT4G36130	-2.95996	-1.8999	1.06006	Same	Same	Same
AT5G24990	-2.95966	-3.12146	0.161798	Same	Same	Same
AT3G28130	-2.95826	-1.96274	0.995529	Same	Same	Same
AT3G44670	-2.95496	-4.04143	1.08647	Same	Same	Same
AT4G36925	-2.94514	-1.97638	0.968756	Same	Same	Same
AT3G18320	-2.92753	-3.12889	0.201352	Same	Same	Same
AT5G38565	-2.91976	-1.94364	0.976113	Same	Same	Same
AT5G27100	-2.88736	-2.50133	0.386028	Same	Same	Same
AT5G45490	-2.84386	-2.99488	0.151021	Same	Same	Same
AT1G52260	-2.80999	-1.4964	1.31359	Same	Same	Same
AT5G36120	-2.80697	-3.40103	0.594061	Same	Same	Same
AT3G31068	-2.79964	0.211788	3.01143	Opposite	Same	Same
AT4G16880	-2.7793	-3.18597	0.40667	Same	Same	Same
AT3G43540	-2.77742	-1.75619	1.02123	Same	Same	Same
AT2G05310	-2.73809	-1.56247	1.17562	Same	Same	Same
AT5G55810	-2.72947	-3.0288	0.299331	Same	Same	Same
AT5G25010	-2.71034	-2.25035	0.459989	Same	Same	Same
AT4G01985	-2.6818	-1.71522	0.966579	Same	Same	Same
AT3G62460	-2.67937	-2.93999	0.260619	Same	Same	Same
AT5G56000	-2.67117	-3.50271	0.831547	Same	Same	Same
AT1G65520	-2.66187	-3.09821	0.436336	Same	Same	Same
AT4G11570	-2.64961	-2.54402	0.105594	Same	Same	Same
AT3G46980	-2.62046	-2.53697	0.0834873	Same	Same	Same
AT4G25225	-2.60852	-1.99069	0.617839	Same	Same	Same
AT5G63580	-2.60418	-1.77672	0.827469	Same	Same	Same
AT1G53885	-2.59051	-0.662548	1.92796	Same	Same	Same
AT1G29600	-2.57939	-3.19515	0.615757	Same	Same	Same
AT5G36001	-2.57773	-2.10151	0.476226	Same	Same	Same
AT1G65980	-2.57295	-3.64454	1.07159	Same	Same	Same
AT3G26240	-2.57238	-2.577	0.00462317	Same	Same	Same
AT1G66660	-2.56787	-2.38503	0.182838	Same	Same	Same
AT2G43535	-2.56005	-2.76915	0.209099	Same	Same	Same
AT5G44973	-2.5172	-2.89213	0.374931	Same	Same	Same
AT1G64260	-2.51461	-1.02813	1.48648	Same	Same	Same
AT2G21830	-2.51025	-0.921467	1.58879	Same	Same	Same
AT4G01595	-2.50583	-3.91982	1.41398	Same	Same	Same
AT5G41750	-2.50042	-0.656126	1.8443	Same	Same	Same
AT4G37320	-2.49851	-2.97511	0.476602	Same	Same	Same
AT2G23120	-2.49593	-1.92174	0.574192	Same	Same	Same
AT5G44420	-2.49488	-2.15856	0.336317	Same	Same	Same
AT2G11270	-2.49341	-3.33981	0.846406	Same	Same	Same
AT4G12500	-2.4846	-2.29461	0.189996	Same	Same	Same
AT4G31650	-2.48196	-2.15662	0.325339	Same	Same	Same
AT1G19397	-2.47061	-2.01096	0.459646	Same	Same	Same
AT2G14460	-2.46291	-1.55434	0.908574	Same	Same	Same
AT3G60960	-2.45958	-0.994524	1.46506	Same	Same	Same
AT1G57150	-2.45672	0.093291	2.55001	Opposite	Same	Same
AT4G01915	-2.45627	-2.39613	0.0601395	Same	Same	Same
AT3G46380	-2.45618	0.137574	2.59375	Opposite	Same	Same
AT1G62422	-2.43125	-1.7939	0.637351	Same	Same	Same
AT5G54960	-2.42591	-1.18411	1.2418	Same	Same	Same
AT1G34060	-2.42322	-2.12192	0.301308	Same	Same	Same
AT1G31380	-2.42051	-0.44697	1.97354	Same	Same	Same
AT1G16130	-2.40196	-1.90526	0.496696	Same	Same	Same
AT1G35710	-2.38556	-0.345553	2.04	Same	Same	Same
AT3G16690	-2.38555	0.033218	2.41877	Opposite	Same	Same
AT3G28291	-2.36379	-0.395089	1.9687	Same	Same	Same
AT4G09920	-2.34064	-1.91822	0.422415	Same	Same	Same
AT2G33850	-2.33504	-1.80295	0.532091	Same	Same	Same
AT1G14520	-2.31278	-2.3789	0.0661128	Same	Same	Same
AT4G09680	-2.30847	-2.35685	0.048376	Same	Same	Same
AT1G80970	-2.30468	-1.62867	0.676017	Same	Same	Same
AT5G43070	-2.30145	-2.07228	0.229169	Same	Same	Same
AT1G44990	-2.29078	0.163916	2.4547	Opposite	Same	Same
AT1G67020	-2.26063	-0.580675	1.67995	Same	Same	Same
AT5G10336	-2.25919	-3.3704	1.11122	Same	Same	Same
AT3G53700	-2.23919	-1.80994	0.429253	Same	Same	Same
AT2G14660	-2.22248	-1.37588	0.846594	Same	Same	Same
AT2G43620	-2.22065	-2.68442	0.463766	Same	Same	Same
AT5G22794	-2.21625	-2.9661	0.749851	Same	Same	Same
AT2G29320	-2.19099	-3.04834	0.857355	Same	Same	Same
AT1G56540	-2.19068	-2.25677	0.0660942	Same	Same	Same
AT1G23650	-2.18281	-0.698774	1.48404	Same	Same	Same
AT3G48280	-2.1793	-3.61949	1.44018	Same	Same	Same
AT5G50950	-2.16341	-1.13217	1.03124	Same	Same	Same
AT2G11570	-2.1596	0.10935	2.26895	Opposite	Same	Same
AT4G01580	-2.15937	-1.18661	0.97276	Same	Same	Same
AT3G29035	-2.15243	-2.77658	0.624144	Same	Same	Same
AT3G25011	-2.14513	-1.63097	0.514154	Same	Same	Same
AT1G30530	-2.14208	-1.2299	0.912186	Same	Same	Same
AT3G14210	-2.1356	-2.79492	0.659317	Same	Same	Same
AT5G45840	-2.13553	-0.438484	1.69705	Same	Same	Same
AT5G24150	-2.13335	-2.59914	0.465797	Same	Same	Same
AT2G07505	-2.11944	0.04488	2.16432	Opposite	Same	Same
AT1G32720	-2.11783	0.386716	2.50454	Opposite	Same	Same
AT5G08600	-2.11756	-1.20485	0.912711	Same	Same	Same
AT4G20670	-2.11616	0.06227	2.17843	Opposite	Same	Same
AT1G60530	-2.11163	-0.709507	1.40212	Same	Same	Same
AT4G06536	-2.10517	-2.40313	0.297959	Same	Same	Same
AT3G47360	-2.07787	-1.87636	0.201515	Same	Same	Same
AT4G02850	-2.07546	-2.39546	0.319997	Same	Same	Same
AT4G16850	-2.07355	-1.35843	0.715123	Same	Same	Same
AT5G38010	-2.0585	-2.98502	0.926515	Same	Same	Same
AT2G21850	-2.058	-2.46397	0.40597	Same	Same	Same
AT3G28070	-2.05552	-1.10789	0.947622	Same	Same	Same
AT2G24190	-2.05507	-1.68658	0.368493	Same	Same	Same
AT1G65250	-2.04329	-1.11661	0.926677	Same	Same	Same
AT1G55380	-2.03465	-0.17415	1.8605	Same	Same	Same
AT3G55170	-2.03458	-1.91422	0.120358	Same	Same	Same
AT5G46010	-2.02803	0.289792	2.31782	Opposite	Same	Same
AT5G39320	-1.99947	-2.13471	0.135242	Same	Same	Same
AT1G60530	-1.99628	-0.709507	1.28677	Same	Same	Same
AT1G27180	-1.98979	-1.87178	0.118013	Same	Same	Same
AT3G29670	-1.98719	-0.504031	1.48316	Same	Same	Same
AT5G36360	-1.97876	0.430224	2.40899	Opposite	Same	Same
AT3G52500	-1.97725	-2.24609	0.268849	Same	Same	Same
AT4G14590	-1.96636	-2.27092	0.304559	Same	Same	Same
AT4G03292	-1.9644	-1.63418	0.330214	Same	Same	Same
AT3G23510	-1.96223	-3.35141	1.38918	Same	Same	Same
AT4G20860	-1.95335	-2.56484	0.611488	Same	Same	Same
AT4G12490	-1.95167	-0.751123	1.20055	Same	Same	Same
AT4G12320	-1.9451	-1.72029	0.224806	Same	Same	Same
AT4G19340	-1.94233	0.159943	2.10227	Opposite	Same	Same
AT4G19260	-1.93066	0.304022	2.23468	Opposite	Same	Same
AT4G09420	-1.92394	-3.01176	1.08781	Same	Same	Same
AT4G15660	-1.91622	-1.62601	0.290212	Same	Same	Same
AT1G47820	-1.90329	-1.60583	0.297453	Same	Same	Same
AT4G20650	-1.90012	0.01892	1.91904	Opposite	Same	Same
ATH-MIR44	-1.89449	-0.095412	1.79908	Same	Same	Same
AT2G25450	-1.89248	-1.02879	0.863687	Same	Same	Same
AT4G03811	-1.89145	-1.28289	0.60856	Same	Same	Same
AT2G26020	-1.89057	-0.784265	1.10631	Same	Same	Same
AT2G15310	-1.87833	-1.90008	0.0217503	Same	Same	Same
AT3G05152	-1.87365	0.258116	2.13176	Opposite	Same	Same
AT1G23935	-1.87355	-0.332035	1.54151	Same	Same	Same
AT2G43590	-1.87014	0.961316	2.83146	Opposite	Opposite	Same
AT1G32310	-1.86843	-0.801294	1.06713	Same	Same	Same
AT1G33600	-1.85853	-1.18744	0.671093	Same	Same	Same
AT3G16410	-1.85541	-0.759099	1.09631	Same	Same	Same
AT4G12170	-1.85056	-1.14415	0.706409	Same	Same	Same
AT1G03495	-1.84381	-1.32209	0.521721	Same	Same	Same
AT4G05130	-1.84045	-2.05821	0.217756	Same	Same	Same
AT3G59250	-1.83995	-1.18833	0.651621	Same	Same	Same
AT5G56030	-1.83401	-0.801408	1.0326	Same	Same	Same
AT4G03505	-1.82755	-1.58416	0.24339	Same	Same	Same
AT3G18880	-1.82674	0.043151	1.86989	Opposite	Same	Same
AT4G15620	-1.82481	-0.431004	1.39381	Same	Same	Same
AT2G05440	-1.82398	-0.17314	1.65084	Same	Same	Same
AT1G48720	-1.82164	1.02097	2.84262	Opposite	Opposite	Opposite
AT4G39180	-1.81797	-1.24402	0.573948	Same	Same	Same
AT5G24355	-1.81468	0.103527	1.91821	Opposite	Same	Same
AT1G11850	-1.80863	-2.00263	0.194006	Same	Same	Same
AT3G21351	-1.80591	-1.28681	0.51909	Same	Same	Same
AT3G25013	-1.80507	-1.5724	0.232673	Same	Same	Same
AT5G22300	-1.80365	-0.59022	1.21343	Same	Same	Same
AT1G57450	-1.80198	0.880335	2.68231	Opposite	Opposite	Same
AT5G36320	-1.80123	0.058114	1.85935	Opposite	Same	Same
AT5G43150	-1.80115	-0.70437	1.09678	Same	Same	Same
AT1G55990	-1.79761	-6.39797	4.60036	Same	Same	Same
AT1G57420	-1.79228	0.24165	2.03393	Opposite	Same	Same
AT5G27247	-1.78503	-3.02477	1.23974	Same	Same	Same
AT4G20630	-1.7761	-0.008947	1.76716	Same	Same	Same
AT5G40330	-1.77486	-2.49094	0.716082	Same	Same	Same
AT1G03550	-1.75989	-1.74212	0.0177677	Same	Same	Same
AT3G43940	-1.75861	0.523603	2.28222	Opposite	Same	Same
AT5G37410	-1.74419	-1.02378	0.720419	Same	Same	Same
AT5G36001	-1.74376	-2.10151	0.357753	Same	Same	Same
AT5G44490	-1.73613	-1.13962	0.596502	Same	Same	Same
AT2G04032	-1.73181	-3.08421	1.3524	Same	Same	Same
AT5G41740	-1.72903	-1.30445	0.424586	Same	Same	Same
AT1G51520	-1.72668	-2.71032	0.983642	Same	Same	Same
AT3G43490	-1.7152	-0.050913	1.66429	Same	Same	Same
AT2G10557	-1.71504	0.223386	1.93843	Opposite	Same	Same
AT4G13160	-1.70996	-1.58198	0.127986	Same	Same	Same
AT1G31820	-1.70641	-2.27838	0.571971	Same	Same	Same
AT1G62620	-1.70203	-1.92185	0.219825	Same	Same	Same
AT1G64700	-1.69673	-0.373055	1.32368	Same	Same	Same
AT1G14530	-1.69183	-2.17117	0.479335	Same	Same	Same
AT3G43722	-1.68481	-0.562294	1.12252	Same	Same	Same
AT4G09500	-1.68408	-2.51483	0.830748	Same	Same	Same
AT3G03830	-1.6837	0.030022	1.71372	Opposite	Same	Same
AT1G59171	-1.66362	0.183545	1.84717	Opposite	Same	Same
AT4G04775	-1.65321	-0.599213	1.054	Same	Same	Same
AT1G58725	-1.6471	-1.22171	0.42539	Same	Same	Same
AT1G58725	-1.64442	-1.22171	0.422714	Same	Same	Same
AT1G19260	-1.63903	0.169701	1.80873	Opposite	Same	Same
AT3G44970	-1.6315	-2.54055	0.909052	Same	Same	Same
AT2G30945	-1.63015	-0.526232	1.10392	Same	Same	Same
AT1G54050	-1.62948	-0.915482	0.714	Same	Same	Same
AT2G31271	-1.62418	0.100064	1.72424	Opposite	Same	Same
AT4G19700	-1.62371	-1.17517	0.448537	Same	Same	Same
AT4G16960	-1.61939	-1.67027	0.0508785	Same	Same	Same
AT5G37950	-1.60727	0.159712	1.76698	Opposite	Same	Same
AT1G62670	-1.60383	-2.23634	0.632506	Same	Same	Same
AT3G44713	-1.60192	-1.48891	0.113009	Same	Same	Same
AT1G50050	-1.59768	0.285452	1.88313	Opposite	Same	Same
AT5G10605	-1.59654	-1.00678	0.589767	Same	Same	Same
AT1G69550	-1.59619	-1.30326	0.292929	Same	Same	Same
AT4G09760	-1.59465	-1.09573	0.498927	Same	Same	Same
AT2G40670	-1.59134	-0.873677	0.717667	Same	Same	Same
AT4G13920	-1.58565	-3.39252	1.80687	Same	Same	Same
AT4G09649	-1.58109	-0.318087	1.263	Same	Same	Same
AT1G72930	-1.57491	-0.891904	0.683004	Same	Same	Same
AT4G01450	-1.56521	-1.19177	0.373442	Same	Same	Same
AT3G44490	-1.56016	-2.68157	1.12141	Same	Same	Same
AT1G75250	-1.55798	-0.280432	1.27755	Same	Same	Same
AT1G53870	-1.55768	-0.578007	0.979672	Same	Same	Same
AT4G00380	-1.55355	-0.496406	1.05714	Same	Same	Same
AT5G40500	-1.54825	-1.85112	0.302871	Same	Same	Same
AT1G05200	-1.54625	-0.730684	0.815566	Same	Same	Same
AT1G33770	-1.54038	-0.857378	0.683	Same	Same	Same
AT4G00315	-1.53108	0.173937	1.70502	Opposite	Same	Same
AT1G58160	-1.52621	-1.37211	0.154095	Same	Same	Same
AT5G36330	-1.52497	0.435988	1.96096	Opposite	Same	Same
AT1G53870	-1.52345	-0.578007	0.945438	Same	Same	Same
AT5G44578	-1.51919	0.460494	1.97968	Opposite	Same	Same
AT1G64230	-1.51063	-2.1444	0.633772	Same	Same	Same
AT1G34760	-1.50983	-0.386716	1.12312	Same	Same	Same
AT4G24410	-1.50633	-1.98633	0.480001	Same	Same	Same
AT1G12290	-1.50624	-0.060171	1.44607	Same	Same	Same
AT2G17880	-1.50132	-1.47364	0.0276845	Same	Same	Same
AT1G48390	-1.50017	-2.48834	0.988169	Same	Same	Same
AT2G11778	-1.49904	-0.431836	1.0672	Same	Same	Same
AT4G06534	-1.49384	-2.16032	0.666484	Same	Same	Same
AT5G44560	-1.48241	-0.322952	1.15946	Same	Same	Same
AT5G44540	-1.48238	-1.70005	0.217665	Same	Same	Same
AT5G38050	-1.48089	-0.565754	0.915136	Same	Same	Same
AT2G06002	-1.47985	1.01726	2.49711	Opposite	Opposite	Opposite
AT2G21640	-1.47338	-1.03224	0.441132	Same	Same	Same
AT5G39090	-1.47071	-1.44587	0.0248455	Same	Same	Same
AT4G22950	-1.46261	0.251509	1.71412	Opposite	Same	Same
AT4G11210	-1.45036	-1.95981	0.50945	Same	Same	Same
AT2G13422	-1.43861	-0.954344	0.484263	Same	Same	Same
AT2G39030	-1.42973	-1.29099	0.138741	Same	Same	Same
AT1G24530	-1.42941	-2.69259	1.26318	Same	Same	Same
AT5G54145	-1.42874	-0.305163	1.12358	Same	Same	Same
AT5G40790	-1.42511	-1.64475	0.219639	Same	Same	Same
AT1G27190	-1.42047	-0.723005	0.697463	Same	Same	Same
AT5G50570	-1.41949	-1.36392	0.0555727	Same	Same	Same
AT2G43270	-1.41719	-0.273359	1.14383	Same	Same	Same
AT4G14980	-1.41408	-3.4017	1.98762	Same	Same	Same
AT5G36658	-1.41348	0.403826	1.8173	Opposite	Same	Same
AT2G03270	-1.41218	-0.786044	0.626135	Same	Same	Same
ATH-MIR16	-1.41147	-0.59759	0.813877	Same	Same	Same
AT3G46616	-1.40672	-3.77934	2.37262	Same	Same	Same
AT3G58430	-1.40623	-0.685325	0.720902	Same	Same	Same
AT4G29735	-1.39701	-1.58321	0.186199	Same	Same	Same
AT3G44440	-1.39298	-0.159063	1.23392	Same	Same	Same
AT2G11405	-1.38912	-0.338708	1.05042	Same	Same	Same
AT4G39986	-1.38897	0.011034	1.40001	Opposite	Same	Same
AT4G15096	-1.38675	0.57129	1.95804	Opposite	Same	Same
AT4G21400	-1.37881	-0.493981	0.884829	Same	Same	Same
AT5G58390	-1.37866	-0.222428	1.15623	Same	Same	Same
AT5G46220	-1.37788	-0.882399	0.495484	Same	Same	Same
AT1G65510	-1.37371	-3.37663	2.00292	Same	Same	Same
AT5G16980	-1.37188	-3.35218	1.9803	Same	Same	Same
AT4G19120	-1.36638	-1.12585	0.240532	Same	Same	Same
AT3G24535	-1.3643	0.807775	2.17207	Opposite	Opposite	Same
AT3G12820	-1.34384	-0.121532	1.22231	Same	Same	Same
AT2G32160	-1.34087	-2.56763	1.22676	Same	Same	Same
AT5G57565	-1.34072	-0.599701	0.741017	Same	Same	Same
AT3G05890	-1.33997	0.030421	1.37039	Opposite	Same	Same
AT5G44980	-1.33691	0.091731	1.42864	Opposite	Same	Same
AT5G44574	-1.33231	-2.52083	1.18852	Same	Same	Same
AT1G59970	-1.33029	-1.11557	0.214714	Same	Same	Same
AT5G43620	-1.32789	0.169128	1.49701	Opposite	Same	Same
AT1G23965	-1.32604	-0.705397	0.620641	Same	Same	Same
AT2G04070	-1.32343	0.224603	1.54803	Opposite	Same	Same
AT5G38000	-1.31694	-2.33911	1.02218	Same	Same	Same
AT5G39210	-1.31548	0.141353	1.45683	Opposite	Same	Same
AT4G01335	-1.31058	-0.35707	0.953509	Same	Same	Same
AT4G10160	-1.30882	-2.27549	0.966668	Same	Same	Same
AT1G05420	-1.30642	-0.5262	0.78022	Same	Same	Same
AT5G41650	-1.30532	-1.11247	0.19284	Same	Same	Same
AT4G02890	-1.30273	-1.12943	0.173295	Same	Same	Same
AT4G15953	-1.30245	-0.551463	0.750983	Same	Same	Same
AT2G24870	-1.29948	-0.913456	0.386019	Same	Same	Same
AT1G34910	-1.29628	0.746777	2.04306	Opposite	Opposite	Same
AT4G09840	-1.29232	-0.661295	0.63103	Same	Same	Same
AT4G11370	-1.29011	-1.2294	0.060711	Same	Same	Same
AT4G29700	-1.28954	-0.674395	0.615148	Same	Same	Same
AT3G54260	-1.28733	-0.926781	0.360544	Same	Same	Same
AT3G56770	-1.28496	-1.52898	0.244025	Same	Same	Same
AT3G31051	-1.2802	0.133986	1.41419	Opposite	Same	Same
AT3G50270	-1.27959	-0.5221	0.757489	Same	Same	Same
AT2G23100	-1.27938	0.002093	1.28147	Opposite	Same	Same
AT1G34810	-1.27857	-0.008559	1.27001	Same	Same	Same
AT5G44430	-1.27599	-1.23201	0.0439755	Same	Same	Same
AT1G56940	-1.27452	1.78548	3.05999	Opposite	Opposite	Opposite
AT4G02430	-1.26961	-1.08319	0.186421	Same	Same	Same
AT1G35320	-1.26551	-2.08657	0.821062	Same	Same	Same
AT5G36490	-1.26382	0.74404	2.00786	Opposite	Opposite	Same
AT5G08535	-1.25892	-0.672951	0.585965	Same	Same	Same
AT5G03400	-1.25869	0.44348	1.70217	Opposite	Same	Same
AT1G34840	-1.25804	0.013973	1.27201	Opposite	Same	Same
AT2G40010	-1.2476	-1.64661	0.399014	Same	Same	Same
AT5G24920	-1.24634	-1.5494	0.303056	Same	Same	Same
AT5G18065	-1.24532	-0.046576	1.19875	Same	Same	Same
AT3G56790	-1.24246	-0.409706	0.832752	Same	Same	Same
AT3G53420	-1.2424	-2.14707	0.904672	Same	Same	Same
AT1G43310	-1.24028	-1.9211	0.680815	Same	Same	Same
AT3G16020	-1.23633	-2.40307	1.16674	Same	Same	Same
AT3G57520	-1.23048	-1.46601	0.235528	Same	Same	Same
AT4G01380	-1.23012	-0.141794	1.08833	Same	Same	Same
AT3G16360	-1.21979	-0.098962	1.12082	Same	Same	Same
AT5G44005	-1.21627	0.46452	1.68079	Opposite	Same	Same
AT1G23950	-1.21605	-0.832719	0.383336	Same	Same	Same
AT4G36050	-1.21542	-0.702733	0.512687	Same	Same	Same
AT1G09680	-1.21533	-0.476538	0.738789	Same	Same	Same
AT5G27230	-1.21494	-0.937423	0.277522	Same	Same	Same
AT4G07940	-1.21467	-0.226932	0.987741	Same	Same	Same
AT4G30290	-1.21426	-0.709633	0.504628	Same	Same	Same
AT5G37620	-1.20421	0.363625	1.56784	Opposite	Same	Same
AT1G36510	-1.20113	-0.051292	1.14984	Same	Same	Same
AT4G10450	-1.1953	-0.933233	0.262063	Same	Same	Same
AT1G17250	-1.19294	0.092823	1.28576	Opposite	Same	Same
AT3G29280	-1.18961	-1.19668	0.00707483	Same	Same	Same
AT1G03550	-1.18882	-1.74212	0.553298	Same	Same	Same
AT5G36480	-1.17923	0.132065	1.31129	Opposite	Same	Same
AT2G43820	-1.1778	-0.83692	0.340877	Same	Same	Same
AT5G46640	-1.17754	-1.08427	0.0932663	Same	Same	Same
AT4G13500	-1.17622	-0.792458	0.38376	Same	Same	Same
AT3G49620	-1.1749	-1.72865	0.553758	Same	Same	Same
AT1G65500	-1.17148	-1.59999	0.428506	Same	Same	Same
AT1G01380	-1.17135	-0.785926	0.385424	Same	Same	Same
AT1G66650	-1.16838	-0.709088	0.459291	Same	Same	Same
AT3G28216	-1.16474	-0.016514	1.14822	Same	Same	Same
AT3G24515	-1.16326	-1.94374	0.780479	Same	Same	Same
AT3G23245	-1.16297	0.434425	1.5974	Opposite	Same	Same
AT4G01533	-1.16252	-1.64438	0.481862	Same	Same	Same
AT1G67460	-1.1614	-1.36369	0.202293	Same	Same	Same
AT1G58380	-1.16112	-0.81392	0.347203	Same	Same	Same
AT1G74810	-1.15887	-1.77445	0.615582	Same	Same	Same
AT5G39380	-1.15788	-1.75748	0.599601	Same	Same	Same
AT2G07773	-1.15489	-0.838286	0.316601	Same	Same	Same
AT5G15690	-1.15382	0.003457	1.15727	Opposite	Same	Same
AY707462	-1.15356	-1.7699	0.616346	Same	Same	Same
AT1G65295	-1.15291	0.060763	1.21367	Opposite	Same	Same
AT1G22370	-1.1518	-0.584058	0.567746	Same	Same	Same
AT5G45070	-1.15032	-4.75907	3.60875	Same	Same	Same
AT4G04810	-1.14924	-1.39502	0.245784	Same	Same	Same
AT4G01350	-1.14645	-2.95016	1.8037	Same	Same	Same
AT3G48346	-1.1464	1.94395	3.09034	Opposite	Opposite	Opposite
AT3G55910	-1.14632	-0.897993	0.248328	Same	Same	Same
AT1G61580	-1.14425	-1.31063	0.16638	Same	Same	Same
AT5G54480	-1.13921	-0.315047	0.824165	Same	Same	Same
AT2G12461	-1.13366	-0.664129	0.469535	Same	Same	Same
AT5G37500	-1.1322	-0.900297	0.231908	Same	Same	Same
AT5G57790	-1.13177	-0.606168	0.525603	Same	Same	Same
AT1G69540	-1.13052	-0.705472	0.425048	Same	Same	Same
AT2G47485	-1.12697	-0.29467	0.832298	Same	Same	Same
AT5G47330	-1.12672	-1.1756	0.0488782	Same	Same	Same
AT5G43730	-1.12372	-0.743282	0.38044	Same	Same	Same
AT5G08565	-1.1223	-0.830043	0.292257	Same	Same	Same
AT5G28810	-1.12101	-0.803381	0.317631	Same	Same	Same
AT2G47270	-1.11949	-2.08925	0.969766	Same	Same	Same
AT3G30370	-1.11627	0.352287	1.46856	Opposite	Same	Same
AT2G35830	-1.11516	-0.33058	0.784582	Same	Same	Same
AT2G38180	-1.10327	-0.751875	0.351392	Same	Same	Same
AT1G17240	-1.10204	0.910052	2.01209	Opposite	Opposite	Same
AT1G64800	-1.09715	0.198905	1.29606	Opposite	Same	Same
AT3G53342	-1.09589	0.51038	1.60627	Opposite	Same	Same
AT2G03980	-1.09535	-0.941119	0.154236	Same	Same	Same
AT5G45973	-1.09522	0.073973	1.1692	Opposite	Same	Same
AT2G13660	-1.09066	-3.32347	2.2328	Same	Same	Same
AT2G11891	-1.08938	-2.02971	0.940333	Same	Same	Same
AT3G60075	-1.08796	0.274188	1.36215	Opposite	Same	Same
AT2G34780	-1.08778	-1.85063	0.762849	Same	Same	Same
AT3G27980	-1.08568	-1.57449	0.488806	Same	Same	Same
AT4G16835	-1.08375	-1.58655	0.502797	Same	Same	Same
AT1G57460	-1.08049	-0.124392	0.956102	Same	Same	Same
AT5G17080	-1.07842	0.222718	1.30114	Opposite	Same	Same
AT1G52410	-1.07835	-0.357076	0.721269	Same	Same	Same
AT1G56250	-1.07125	-0.646146	0.425103	Same	Same	Same
AT5G45440	-1.07069	-3.42797	2.35728	Same	Same	Same
AT1G67260	-1.07066	-0.018236	1.05242	Same	Same	Same
AT5G63952	-1.06904	-0.189124	0.879912	Same	Same	Same
AT2G05360	-1.06804	0.073889	1.14193	Opposite	Same	Same
AT5G46790	-1.06635	0.345063	1.41141	Opposite	Same	Same
AT3G60650	-1.0626	1.28957	2.35216	Opposite	Opposite	Opposite
AT5G35926	-1.06138	-0.71442	0.346964	Same	Same	Same
AT1G49940	-1.05928	-0.320304	0.738973	Same	Same	Same
AT1G28670	-1.0569	-0.93979	0.117113	Same	Same	Same
AT1G35040	-1.05648	-0.198788	0.857692	Same	Same	Same
AT4G21830	-1.05458	-1.12294	0.0683623	Same	Same	Same
AT1G80960	-1.04736	-2.21235	1.16499	Same	Same	Same
AT5G09520	-1.04336	-0.968803	0.0745528	Same	Same	Same
AT3G47130	-1.04319	-0.03644	1.00675	Same	Same	Same
AT3G61380	-1.03921	-0.280004	0.759208	Same	Same	Same
AT4G01220	-1.03865	-1.17385	0.135198	Same	Same	Same
AT1G52030	-1.03732	-1.61301	0.575684	Same	Same	Same
AT5G62800	-1.03471	-0.114593	0.920115	Same	Same	Same
AT5G27060	-1.0313	-0.164824	0.866474	Same	Same	Same
AT3G17890	-1.03037	-0.861238	0.169137	Same	Same	Same
AT4G12382	-1.02921	-0.625639	0.403574	Same	Same	Same
AT2G04680	-1.02816	-0.140228	0.887928	Same	Same	Same
AT5G49860	-1.01794	0.599691	1.61763	Opposite	Opposite	Same
AT2G02680	-1.01746	-4.05942	3.04196	Same	Same	Same
AT5G57240	-1.01357	-1.12217	0.108603	Same	Same	Same
AT2G24390	-1.01225	-1.1581	0.145846	Same	Same	Same
AT1G72890	-1.01215	-1.36656	0.354409	Same	Same	Same
AT4G19450	-1.00958	-0.190537	0.819045	Same	Same	Same
AT3G11395	-1.00671	0.635062	1.64177	Opposite	Opposite	Same
AT2G17043	-1.00387	0.523447	1.52732	Opposite	Same	Same
AT1G57850	-0.993507	0.574791	1.5683	Opposite	Same	Same
AT4G01460	-0.993108	-1.10561	0.112504	Same	Same	Same
AT1G66060	-0.992185	-0.01369	0.978495	Same	Same	Same
AT2G24390	-0.991584	-1.1581	0.166515	Same	Same	Same
AT5G27050	-0.990332	0.117775	1.10811	Opposite	Same	Same
AT5G28720	-0.986844	0.056923	1.04377	Opposite	Same	Same
AT2G12400	-0.986636	-0.057954	0.928682	Same	Same	Same
AT5G24780	-0.986141	-2.55733	1.57119	Same	Same	Same
AT1G53690	-0.983825	0.646332	1.63016	Opposite	Opposite	Same
AT5G38150	-0.972423	-0.486095	0.486328	Same	Same	Same
AT5G27080	-0.971235	0.460024	1.43126	Opposite	Same	Same
AT3G48270	-0.970228	-0.02164	0.948588	Same	Same	Same
AT5G54148	-0.9679	-0.451529	0.516371	Same	Same	Same
AT1G31390	-0.967824	0.150015	1.11784	Opposite	Same	Same
AT3G17280	-0.967685	-1.65564	0.687952	Same	Same	Same
AT3G45093	-0.967542	-1.69144	0.723896	Same	Same	Same
AT5G46650	-0.96653	-0.896696	0.0698342	Same	Same	Same
AT4G02360	-0.966376	-2.14311	1.17673	Same	Same	Same
AT3G55900	-0.964375	0.433628	1.398	Opposite	Same	Same
AT3G23100	-0.960229	-1.67589	0.715657	Same	Same	Same
AT5G23940	-0.959464	-0.570518	0.388946	Same	Same	Same
AT1G61840	-0.957722	-1.55401	0.596293	Same	Same	Same
AT5G03406	-0.956491	-0.080667	0.875824	Same	Same	Same
AT5G38390	-0.951377	0.15659	1.10797	Opposite	Same	Same
AT1G72870	-0.949171	-1.05982	0.110652	Same	Same	Same
AT3G13404	-0.947435	-1.46554	0.518101	Same	Same	Same
AT3G26922	-0.947178	-0.917318	0.0298595	Same	Same	Same
AT4G29710	-0.946949	-2.22841	1.28146	Same	Same	Same
AT5G36540	-0.946463	-0.197137	0.749326	Same	Same	Same
AT4G14695	-0.945976	-0.802413	0.143563	Same	Same	Same
AT2G14378	-0.944507	0.842968	1.78748	Opposite	Opposite	Same
AT1G27160	-0.942932	0.187334	1.13027	Opposite	Same	Same
AT5G20740	-0.941696	-0.673422	0.268274	Same	Same	Same
AT1G34800	-0.940889	0.12092	1.06181	Opposite	Same	Same
AT5G63087	-0.93904	-0.726869	0.212171	Same	Same	Same
AT5G44550	-0.936855	-1.1982	0.261349	Same	Same	Same
AT4G36580	-0.93357	-0.17356	0.76001	Same	Same	Same
AT1G52400	-0.933512	-0.45922	0.474292	Same	Same	Same
AT5G60440	-0.930893	-0.511981	0.418912	Same	Same	Same
AT2G27010	-0.930322	-2.49125	1.56093	Same	Same	Same
AT1G60983	-0.927924	0.222721	1.15065	Opposite	Same	Same
AT2G04910	-0.926674	0.562036	1.48871	Opposite	Same	Same
AT1G59920	-0.923809	0.602907	1.52672	Opposite	Opposite	Same
AT2G24390	-0.921104	-1.1581	0.236995	Same	Same	Same
AT5G55770	-0.918092	-0.35565	0.562442	Same	Same	Same
AT4G11550	-0.917706	-0.360636	0.55707	Same	Same	Same
AT4G12390	-0.917683	-0.23091	0.686773	Same	Same	Same
AT5G62920	-0.9168	0.393096	1.3099	Opposite	Same	Same
AT1G30160	-0.915392	-0.708153	0.207239	Same	Same	Same
AY057712	-0.914665	-0.981189	0.0665237	Same	Same	Same
AT3G16851	-0.914313	0.10158	1.01589	Opposite	Same	Same
AT4G12430	-0.911226	-0.969534	0.0583077	Same	Same	Same
AT1G31400	-0.909358	-0.012756	0.896602	Same	Same	Same
AT2G05380	-0.90799	-0.10988	0.79811	Same	Same	Same
AT1G51900	-0.905456	-0.297395	0.608061	Same	Same	Same
AT3G16390	-0.905188	2.13566	3.04084	Opposite	Opposite	Same
ATH-MIR82	-0.905077	0.056098	0.961175	Opposite	Same	Same
AT1G01130	-0.904302	-0.527542	0.37676	Same	Same	Same
AT2G13125	-0.903928	0.452809	1.35674	Opposite	Same	Same
AT5G25880	-0.903529	-1.18827	0.284745	Same	Same	Same
AT3G28918	-0.902177	-0.335994	0.566183	Same	Same	Same
AT1G29460	-0.901065	-0.058685	0.84238	Same	Same	Same
AT3G13540	-0.90101	-1.10425	0.203238	Same	Same	Same
AT2G02850	-0.899959	-0.279299	0.62066	Same	Same	Same
AT2G35950	-0.896669	-1.09905	0.202382	Same	Same	Same
AT5G16340	-0.896546	-0.643137	0.253409	Same	Same	Same
AT4G31136	-0.896392	0.768486	1.66488	Opposite	Opposite	Same
AT5G23270	-0.893057	0.235896	1.12895	Opposite	Same	Same
AT4G09490	-0.889359	-0.107586	0.781773	Same	Same	Same
AT3G10190	-0.888196	-0.539853	0.348343	Same	Same	Same
AT2G17920	-0.886585	-0.759582	0.127003	Same	Same	Same
AT3G57072	-0.88575	-0.118337	0.767413	Same	Same	Same
AT2G08986	-0.885275	-0.066537	0.818738	Same	Same	Same
AT4G13610	-0.883272	0.066698	0.94997	Opposite	Same	Same
AT2G40380	-0.88276	-0.225974	0.656786	Same	Same	Same
AT1G65210	-0.882705	-0.54866	0.334045	Same	Same	Same
AT2G07739	-0.882031	-1.3985	0.516473	Same	Same	Same
AT1G09665	-0.880187	-0.038534	0.841653	Same	Same	Same
AT3G03850	-0.879625	0.28841	1.16804	Opposite	Same	Same
AT1G50055	-0.877636	-1.72828	0.850646	Same	Same	Same
AT3G48090	-0.874778	-0.815664	0.059114	Same	Same	Same
AT4G13100	-0.872136	-0.738479	0.133657	Same	Same	Same
AT5G19257	-0.870697	2.59162	3.46232	Opposite	Opposite	Same
AT3G25570	-0.869853	-1.16983	0.299973	Same	Same	Same
AT2G07290	-0.868127	0.210243	1.07837	Opposite	Same	Same
AT1G33710	-0.864872	0.369995	1.23487	Opposite	Same	Same
AT1G29770	-0.86327	-0.697676	0.165594	Same	Same	Same
AT2G28210	-0.862011	-2.10793	1.24591	Same	Same	Same
AT5G27606	-0.856144	0.27873	1.13487	Opposite	Same	Same
AT4G00390	-0.854562	-2.93874	2.08418	Same	Same	Same
AT1G21738	-0.841787	0.12197	0.963757	Opposite	Same	Same
AT5G54860	-0.84045	-1.34753	0.507082	Same	Same	Same
AT3G29130	-0.840237	-1.0558	0.21556	Same	Same	Same
AT5G36500	-0.839072	0.2482	1.08727	Opposite	Same	Same
AT3G57320	-0.839001	0.09628	0.935281	Opposite	Same	Same
AT3G18530	-0.838489	-0.288198	0.550291	Same	Same	Same
AT3G50570	-0.835674	-0.631522	0.204153	Same	Same	Same
AT1G17020	-0.835646	-1.94573	1.11008	Same	Same	Same
AT5G03435	-0.835577	-0.260454	0.575123	Same	Same	Same
AT5G36657	-0.833603	-0.140717	0.692886	Same	Same	Same
AT5G38386	-0.833512	-0.803501	0.0300112	Same	Same	Same
AT5G39140	-0.832501	0.625372	1.45787	Opposite	Opposite	Same
AT3G42475	-0.831708	-0.393103	0.438605	Same	Same	Same
AT2G11462	-0.83163	0.177826	1.00946	Opposite	Same	Same
AT3G05975	-0.826176	0.233686	1.05986	Opposite	Same	Same
AT4G19330	-0.82449	0.176167	1.00066	Opposite	Same	Same
AT5G43200	-0.823854	-0.091275	0.732579	Same	Same	Same
AT4G02541	-0.82326	0.151289	0.974549	Opposite	Same	Same
AT4G21065	-0.821641	-0.749341	0.0723003	Same	Same	Same
AT5G25910	-0.820603	-1.23027	0.409662	Same	Same	Same
AT2G43870	-0.820145	-0.454161	0.365984	Same	Same	Same
AT3G28880	-0.81916	-0.415037	0.404123	Same	Same	Same
AT2G01990	-0.818799	-0.097865	0.720934	Same	Same	Same
AT5G38895	-0.817984	-0.372474	0.44551	Same	Same	Same
AT5G26270	-0.8153	-1.09223	0.276929	Same	Same	Same
AT4G02660	-0.813363	-1.22267	0.409311	Same	Same	Same
AT1G36230	-0.812951	-0.119711	0.69324	Same	Same	Same
AT4G39675	-0.809768	-1.20395	0.394179	Same	Same	Same
AT5G58660	-0.805616	-0.332698	0.472918	Same	Same	Same
AT1G08560	-0.805066	-0.81191	0.00684367	Same	Same	Same
AT4G33290	-0.805043	-0.418138	0.386905	Same	Same	Same
AJ505638	-0.801897	-0.275717	0.52618	Same	Same	Same
AT1G08430	-0.801025	0.272709	1.07373	Opposite	Same	Same
AT4G11745	-0.799788	0.26892	1.06871	Opposite	Same	Same
AT5G43400	-0.799345	-1.32322	0.52388	Same	Same	Same
AT4G22390	-0.798426	-0.637333	0.161093	Same	Same	Same
AT3G49830	-0.794792	-0.15829	0.636502	Same	Same	Same
AT5G28781	-0.791425	-0.065291	0.726134	Same	Same	Same
AT3G43470	-0.787444	0.116313	0.903757	Opposite	Same	Same
AT1G49860	-0.786858	1.1595	1.94636	Opposite	Opposite	Same
AT2G11623	-0.785977	1.01436	1.80034	Opposite	Opposite	Same
AT5G03795	-0.785464	-0.239862	0.545602	Same	Same	Same
AT4G24265	-0.784576	-0.872933	0.0883567	Same	Same	Same
AT3G47380	-0.78394	0.522964	1.3069	Opposite	Same	Same
AT3G59220	-0.781072	0.178965	0.960037	Opposite	Same	Same
AT1G15080	-0.780303	-1.13635	0.356051	Same	Same	Same
AT3G12110	-0.778128	-0.543722	0.234406	Same	Same	Same
AT3G43431	-0.777382	0.177737	0.955119	Opposite	Same	Same
AT2G17270	-0.775668	-0.967963	0.192295	Same	Same	Same
AT5G62165	-0.771831	-0.182048	0.589783	Same	Same	Same
AT5G49310	-0.770834	-0.134358	0.636476	Same	Same	Same
AT4G18680	-0.76658	0.131225	0.897805	Opposite	Same	Same
AT5G03545	-0.764739	-0.08617	0.678569	Same	Same	Same
AT2G11626	-0.761765	0.121192	0.882957	Opposite	Same	Same
AT2G02498	-0.761449	0.195408	0.956857	Opposite	Same	Same
AT2G38430	-0.7595	0.568598	1.3281	Opposite	Same	Same
AT1G03220	-0.759424	-4.06777	3.30835	Same	Same	Same
AT1G17300	-0.759015	-0.936219	0.177204	Same	Same	Same
AT1G79840	-0.758189	-0.343263	0.414926	Same	Same	Same
AT3G61840	-0.756541	-0.498314	0.258227	Same	Same	Same
AT5G39220	-0.756323	0.410655	1.16698	Opposite	Same	Same
AT5G55240	-0.753142	0.08678	0.839922	Opposite	Same	Same
AT4G30830	-0.752319	-0.211627	0.540692	Same	Same	Same
AT3G29300	-0.748469	-1.28904	0.540566	Same	Same	Same
AT2G30910	-0.747734	-0.175924	0.571811	Same	Same	Same
AT1G27940	-0.745375	-1.00355	0.258175	Same	Same	Same
AT5G65530	-0.745179	-0.217062	0.528117	Same	Same	Same
AT4G02655	-0.744576	-0.000253	0.744323	Same	Same	Same
AT3G50220	-0.743303	-0.057602	0.685701	Same	Same	Same
AT1G31720	-0.743247	-0.43429	0.308957	Same	Same	Same
AT3G16380	-0.742955	0.001287	0.744242	Opposite	Same	Same
AT3G31401	-0.741958	0.559998	1.30196	Opposite	Same	Same
AT3G60660	-0.738346	-0.787791	0.0494452	Same	Same	Same
AT4G00270	-0.736636	-1.28664	0.550002	Same	Same	Same
AT5G60230	-0.736366	-0.555723	0.180643	Same	Same	Same
AT3G50350	-0.735487	0.178008	0.913495	Opposite	Same	Same
AT5G66170	-0.733963	-1.39478	0.660816	Same	Same	Same
AT3G44700	-0.73317	-1.03793	0.304763	Same	Same	Same
AT5G28780	-0.729605	-0.501982	0.227623	Same	Same	Same
AT1G12750	-0.72838	-0.485938	0.242442	Same	Same	Same
AT5G42905	-0.727428	0.169824	0.897252	Opposite	Same	Same
AT1G67760	-0.727124	1.46651	2.19363	Opposite	Opposite	Same
AT3G52550	-0.726307	1.08381	1.81012	Opposite	Opposite	Same
AT1G13430	-0.725923	-0.766896	0.0409733	Same	Same	Same
AT5G44582	-0.723354	-0.663899	0.0594555	Same	Same	Same
AT2G04080	-0.720842	-0.676554	0.0442882	Same	Same	Same
AT2G29480	-0.714846	-3.33828	2.62344	Same	Same	Same
AT3G10200	-0.713222	-1.56331	0.85009	Same	Same	Same
AT3G05140	-0.712414	-1.13379	0.421379	Same	Same	Same
AT5G44572	-0.711618	-0.76345	0.0518325	Same	Same	Same
AT2G18260	-0.708101	-0.828217	0.120117	Same	Same	Same
AT4G27220	-0.707661	-0.15337	0.554291	Same	Same	Same
AT5G50560	-0.706669	0.355824	1.06249	Opposite	Same	Same
AT5G37320	-0.705834	-0.097597	0.608237	Same	Same	Same
AT3G12970	-0.703353	-0.380916	0.322437	Same	Same	Same
AT4G10695	-0.701851	0.248858	0.950709	Opposite	Same	Same
AT3G28600	-0.701147	0.200219	0.901366	Opposite	Same	Same
AT5G36300	-0.699396	0.085864	0.78526	Opposite	Same	Same
AT4G01930	-0.696349	-0.860122	0.163773	Same	Same	Same
AT4G09260	-0.696125	-0.181199	0.514926	Same	Same	Same
AT3G54250	-0.696105	-0.327302	0.368803	Same	Same	Same
AT5G01560	-0.695221	-1.43726	0.742041	Same	Same	Same
AT5G37430	-0.692929	-0.017013	0.675916	Same	Same	Same
AT5G43525	-0.691715	0.765142	1.45686	Opposite	Opposite	Same
AT4G14870	-0.687184	-0.463547	0.223637	Same	Same	Same
AT5G13210	-0.685434	0.309718	0.995152	Opposite	Same	Same
AT3G60020	-0.68508	-0.171641	0.513439	Same	Same	Same
AT5G53650	-0.684202	-0.352857	0.331345	Same	Same	Same
AT1G17350	-0.683191	-0.180014	0.503177	Same	Same	Same
AT2G26820	-0.678909	-4.32171	3.6428	Same	Same	Same
AT2G40955	-0.678017	-0.037701	0.640316	Same	Same	Same
AT1G62085	-0.677146	-1.6761	0.99895	Same	Same	Same
AT4G20050	-0.673326	-0.20866	0.464666	Same	Same	Same
AT3G27910	-0.673276	0.343575	1.01685	Opposite	Same	Same
AT3G44480	-0.671255	-1.09929	0.428032	Same	Same	Same
AT3G43580	-0.670647	-1.03712	0.366476	Same	Same	Same
AT2G05645	-0.667741	-0.214782	0.452959	Same	Same	Same
AT4G22285	-0.665357	-0.447725	0.217632	Same	Same	Same
AT4G39360	-0.664763	-0.684813	0.0200497	Same	Same	Same
AT1G29620	-0.662725	0.335938	0.998663	Opposite	Same	Same
AT4G05310	-0.659601	-0.056873	0.602728	Same	Same	Same
AT3G44590	-0.658341	-0.909512	0.251171	Same	Same	Same
AT5G25780	-0.657943	-0.222825	0.435118	Same	Same	Same
AT5G43980	-0.654208	-1.22307	0.568859	Same	Same	Same
AT1G63560	-0.653834	0.430826	1.08466	Opposite	Same	Same
AT5G65350	-0.652304	-0.667754	0.0154498	Same	Same	Same
AT5G02350	-0.648604	-3.12936	2.48076	Same	Same	Same
AT5G47440	-0.64794	-0.134018	0.513922	Same	Same	Same
AT1G26510	-0.647828	-0.489807	0.158021	Same	Same	Same
AT3G58340	-0.647778	0.169811	0.817589	Opposite	Same	Same
AT3G50840	-0.645143	0.288748	0.933891	Opposite	Same	Same
AT2G34060	-0.644563	-0.117595	0.526968	Same	Same	Same
AT1G29210	-0.643878	0.262994	0.906872	Opposite	Same	Same
AT1G21529	-0.643304	0.27551	0.918814	Opposite	Same	Same
AT2G07110	-0.639933	0.282721	0.922654	Opposite	Same	Same
AT1G67600	-0.635455	0.13438	0.769835	Opposite	Same	Same
AT2G41800	-0.632782	-0.99355	0.360768	Same	Same	Same
AT1G61353	-0.62747	0.472049	1.09952	Opposite	Same	Same
AT3G59000	-0.627321	-0.106035	0.521286	Same	Same	Same
AT4G18900	-0.62581	-0.070975	0.554835	Same	Same	Same
AT5G06720	-0.62569	-0.78109	0.1554	Same	Same	Same
AT1G35183	-0.625424	-1.72187	1.09644	Same	Same	Same
AT3G44680	-0.623277	-1.22607	0.60279	Same	Same	Same
AT1G30840	-0.620791	-0.019238	0.601553	Same	Same	Same
AT4G01200	-0.619328	0.122484	0.741812	Opposite	Same	Same
AT4G23432	-0.617784	0.132489	0.750273	Opposite	Same	Same
AT2G24762	-0.617471	-0.434751	0.18272	Same	Same	Same
AT4G08176	-0.616543	0.047059	0.663602	Opposite	Same	Same
AT2G19230	-0.61414	0.448432	1.06257	Opposite	Same	Same
AT5G42780	-0.614097	0.334015	0.948112	Opposite	Same	Same
AT1G03230	-0.613944	-0.511512	0.102432	Same	Same	Same
AT1G19460	-0.613834	0.261221	0.875054	Opposite	Same	Same
AT4G27590	-0.613129	-0.695537	0.0824075	Same	Same	Same
AT1G66280	-0.609926	-0.622171	0.0122453	Same	Same	Same
AT1G34792	-0.609182	0.410541	1.01972	Opposite	Same	Same
AT2G15050	-0.600025	0.07564	0.675665	Opposite	Same	Same
AT3G45430	-0.59871	-0.525565	0.0731453	Same	Same	Same
AT4G24975	-0.598415	0.03543	0.633845	Opposite	Same	Same
AT2G14285	-0.597818	-0.316377	0.281441	Same	Same	Same
AT5G25000	-0.596409	-0.210988	0.385421	Same	Same	Same
AT1G06630	-0.591862	-0.263508	0.328354	Same	Same	Same
AT1G53935	-0.59085	-1.19285	0.601995	Same	Same	Same
AT3G58193	-0.589438	-0.646785	0.0573472	Same	Same	Same
AT5G17740	-0.588091	0.302048	0.890139	Opposite	Same	Same
AT4G07786	-0.587616	0.433401	1.02102	Opposite	Same	Same
AT5G66650	0.585026	0.750927	0.165901	Same	Same	Same
AT1G02391	0.58503	0.149831	0.435199	Same	Same	Same
AT1G17060	0.585246	0.485656	0.0995905	Same	Same	Same
AT4G18800	0.585448	0.799886	0.214438	Same	Same	Same
AT3G49900	0.585542	0.268306	0.317236	Same	Same	Same
AT3G15170	0.586277	-0.108199	0.694476	Opposite	Same	Same
AT1G35530	0.586425	0.695889	0.109464	Same	Same	Same
AT3G26490	0.586457	0.251009	0.335448	Same	Same	Same
AT5G40720	0.586637	0.152717	0.43392	Same	Same	Same
AT5G02740	0.587058	0.621067	0.0340087	Same	Same	Same
AT2G03850	0.587126	0.995409	0.408282	Same	Same	Same
AT1G34460	0.587182	2.16305	1.57587	Same	Same	Same
AT3G26100	0.587668	0.281249	0.306419	Same	Same	Same
AT1G32300	0.587754	0.573302	0.0144515	Same	Same	Same
AT1G71960	0.58792	0.289985	0.297935	Same	Same	Same
AT2G43320	0.5886	0.162222	0.426378	Same	Same	Same
AT1G09794	0.588812	0.581751	0.00706133	Same	Same	Same
AT4G23470	0.588905	0.3541	0.234805	Same	Same	Same
AT3G18235	0.589049	0.167292	0.421757	Same	Same	Same
AT1G15310	0.589323	0.734912	0.145589	Same	Same	Same
AT5G22380	0.589732	0.265982	0.32375	Same	Same	Same
AT3G09190	0.59077	0.559315	0.0314553	Same	Same	Same
AT3G53940	0.59083	0.996622	0.405792	Same	Same	Same
AT1G12630	0.591199	-0.217109	0.808308	Opposite	Same	Same
AT1G63640	0.59123	0.249515	0.341715	Same	Same	Same
AT3G47200	0.591239	-0.679772	1.27101	Opposite	Opposite	Same
AT5G17780	0.59179	0.56326	0.0285303	Same	Same	Same
AT5G08790	0.592023	0.02845	0.563573	Same	Same	Same
AT5G12280	0.592245	0.524507	0.0677377	Same	Same	Same
AT2G31870	0.592465	0.734964	0.142499	Same	Same	Same
AT4G36220	0.592688	0.25083	0.341858	Same	Same	Same
AT3G44540	0.593003	-0.611408	1.20441	Opposite	Opposite	Same
AT2G22610	0.593055	0.094118	0.498937	Same	Same	Same
AT1G17920	0.593153	0.506023	0.0871302	Same	Same	Same
AT3G13432	0.593175	1.00923	0.416053	Same	Same	Same
AT3G13900	0.593222	1.32078	0.727554	Same	Same	Same
AT5G67530	0.593324	0.730353	0.137029	Same	Same	Same
AT5G64410	0.593342	-0.295225	0.888567	Opposite	Same	Same
AT2G46980	0.593375	-0.07774	0.671115	Opposite	Same	Same
AT2G41340	0.593478	0.589513	0.0039655	Same	Same	Same
AT5G37560	0.593541	1.49515	0.901612	Same	Same	Same
AT5G24655	0.593766	1.1796	0.585836	Same	Same	Same
AT3G57670	0.593813	0.232104	0.361709	Same	Same	Same
AT3G12920	0.593966	0.227655	0.366311	Same	Same	Same
AT5G08120	0.594021	0.78073	0.186709	Same	Same	Same
AT4G40042	0.594074	0.4263	0.167774	Same	Same	Same
AT5G07380	0.594331	-0.24639	0.840721	Opposite	Same	Same
AT4G14096	0.59467	0.920484	0.325814	Same	Same	Same
AT2G40570	0.594769	0.784596	0.189827	Same	Same	Same
AT1G16630	0.595961	-0.265942	0.861903	Opposite	Same	Same
AT2G25360	0.596877	-0.068651	0.665528	Opposite	Same	Same
AT1G65360	0.597272	-0.177174	0.774446	Opposite	Same	Same
AT1G17615	0.597734	0.499286	0.0984482	Same	Same	Same
AT4G34330	0.597805	0.545832	0.0519725	Same	Same	Same
AT4G39640	0.597811	0.155644	0.442166	Same	Same	Same
AT3G01420	0.598	-0.62613	1.22413	Opposite	Opposite	Same
AT4G10000	0.59833	1.07539	0.477059	Same	Same	Same
AT5G58350	0.598649	0.120947	0.477702	Same	Same	Same
AT1G66553	0.598944	0.485167	0.113777	Same	Same	Same
AT1G19190	0.599363	-0.258319	0.857682	Opposite	Same	Same
AT3G04480	0.600073	0.402152	0.197921	Same	Same	Same
AT4G35110	0.600728	-0.054403	0.655131	Opposite	Same	Same
AT3G61035	0.600937	-0.00288	0.603817	Opposite	Same	Same
AT1G79900	0.600975	0.200633	0.400342	Same	Same	Same
AT3G45330	0.601192	0.086834	0.514358	Same	Same	Same
AT2G44980	0.602549	0.246152	0.356397	Same	Same	Same
AT4G04925	0.603692	0.873354	0.269662	Same	Same	Same
AT4G13710	0.604301	0.314054	0.290247	Same	Same	Same
AT3G46290	0.605318	0.363885	0.241433	Same	Same	Same
AT1G53660	0.606498	1.68105	1.07455	Same	Same	Same
AT1G55120	0.606838	0.687458	0.0806202	Same	Same	Same
AT1G02145	0.608204	0.921747	0.313543	Same	Same	Same
AT1G26940	0.60853	0.800258	0.191728	Same	Same	Same
AT3G07522	0.610103	-0.336864	0.946967	Opposite	Same	Same
AT5G20870	0.611078	0.149784	0.461294	Same	Same	Same
AT5G14980	0.611805	0.533945	0.07786	Same	Same	Same
AT5G05190	0.6121	0.531249	0.0808512	Same	Same	Same
AT3G54340	0.612566	-0.578619	1.19119	Opposite	Same	Same
AT3G50940	0.613219	0.954906	0.341687	Same	Same	Same
AT1G49790	0.613345	-0.316905	0.93025	Opposite	Same	Same
AT4G26560	0.613417	1.46597	0.852555	Same	Same	Same
AT2G48010	0.613619	0.006933	0.606686	Same	Same	Same
AT2G33640	0.613822	1.1363	0.522482	Same	Same	Same
AT3G07510	0.614462	0.513878	0.100584	Same	Same	Same
AT1G01750	0.614552	0.659126	0.0445737	Same	Same	Same
AT1G51830	0.614933	0.934806	0.319873	Same	Same	Same
AT3G05550	0.61554	1.21129	0.595745	Same	Same	Same
AT1G27980	0.615758	-0.02244	0.638198	Opposite	Same	Same
AT1G04660	0.616019	1.31751	0.701487	Same	Same	Same
AT4G21200	0.616079	-0.054088	0.670167	Opposite	Same	Same
ATH-MIR15	0.616135	-0.322367	0.938502	Opposite	Same	Same
AT4G36740	0.61629	0.636996	0.0207058	Same	Same	Same
AT3G26080	0.616598	0.469789	0.146809	Same	Same	Same
AT1G19340	0.616665	0.554368	0.062297	Same	Same	Same
AT5G59180	0.617355	1.02835	0.41099	Same	Same	Same
AT1G75960	0.61756	0.282626	0.334934	Same	Same	Same
AT3G60690	0.618905	0.421419	0.197486	Same	Same	Same
AT5G08760	0.618987	0.055349	0.563638	Same	Same	Same
AT4G24860	0.618997	0.08324	0.535757	Same	Same	Same
AT3G02150	0.619044	0.134608	0.484436	Same	Same	Same
AT3G05330	0.619472	-0.17587	0.795342	Opposite	Same	Same
AT3G01980	0.619762	-0.286182	0.905944	Opposite	Same	Same
AT4G14110	0.619775	0.579832	0.0399432	Same	Same	Same
AT3G17550	0.619776	0.667597	0.0478208	Same	Same	Same
AT3G20410	0.619972	0.313759	0.306213	Same	Same	Same
AT4G13880	0.62	0.860181	0.240181	Same	Same	Same
AT5G38210	0.620031	0.180978	0.439053	Same	Same	Same
AT5G53205	0.62019	0.608238	0.0119525	Same	Same	Same
AT1G14370	0.620472	-0.006634	0.627106	Opposite	Same	Same
AT4G38550	0.621405	0.0414	0.580005	Same	Same	Same
AT5G18190	0.621654	0.36642	0.255234	Same	Same	Same
AT1G60890	0.621831	0.116214	0.505617	Same	Same	Same
AT1G12420	0.622107	0.474586	0.147521	Same	Same	Same
AT1G14900	0.62267	0.526228	0.0964425	Same	Same	Same
AT2G44280	0.622694	0.176321	0.446373	Same	Same	Same
AT3G13882	0.623406	-0.260683	0.884089	Opposite	Same	Same
AT5G09300	0.623506	-0.258364	0.88187	Opposite	Same	Same
AT2G27650	0.624004	1.57022	0.946221	Same	Same	Same
AT5G64980	0.624297	1.16961	0.545309	Same	Same	Same
AT3G11750	0.6246	0.462459	0.162141	Same	Same	Same
AT1G11600	0.625314	0.40697	0.218344	Same	Same	Same
AT1G32940	0.625454	-0.106805	0.732259	Opposite	Same	Same
AT3G23633	0.625465	0.229649	0.395816	Same	Same	Same
AT2G26970	0.625624	0.594852	0.0307715	Same	Same	Same
AT4G28405	0.625648	0.579349	0.0462985	Same	Same	Same
AT3G27025	0.625687	0.030204	0.595483	Same	Same	Same
AT3G28810	0.626027	-0.194314	0.820341	Opposite	Same	Same
AT5G22355	0.626112	0.171845	0.454267	Same	Same	Same
AT3G02850	0.626269	0.505925	0.120344	Same	Same	Same
AT2G26210	0.62637	0.36437	0.262	Same	Same	Same
AT5G53060	0.626839	0.390239	0.2366	Same	Same	Same
AT3G07320	0.626993	-0.008757	0.63575	Opposite	Same	Same
AT3G09480	0.627313	0.192838	0.434475	Same	Same	Same
AT4G27580	0.627434	1.23198	0.604551	Same	Same	Same
AT3G01590	0.627516	0.413985	0.213531	Same	Same	Same
AT1G64710	0.627555	0.941537	0.313982	Same	Same	Same
AT5G37140	0.628093	0.524579	0.103514	Same	Same	Same
AT3G27630	0.628196	-0.324377	0.952573	Opposite	Same	Same
AT1G04580	0.62867	-0.062381	0.691051	Opposite	Same	Same
AT1G53543	0.628803	1.3771	0.748297	Same	Same	Same
AT1G71760	0.628911	0.724837	0.0959258	Same	Same	Same
AT4G16215	0.62893	0.89781	0.26888	Same	Same	Same
AT4G17720	0.628997	-0.194802	0.823799	Opposite	Same	Same
AT1G48380	0.62927	1.26185	0.632578	Same	Same	Same
AT1G20480	0.629383	0.822852	0.193469	Same	Same	Same
AT5G41130	0.629425	0.238656	0.390769	Same	Same	Same
AT2G07779	0.629687	0.720752	0.091065	Same	Same	Same
AT1G21928	0.630169	-0.304819	0.934988	Opposite	Same	Same
AT4G26150	0.63111	1.16932	0.538211	Same	Same	Same
AT2G23945	0.631384	0.384578	0.246806	Same	Same	Same
AT2G05120	0.631475	0.553432	0.0780432	Same	Same	Same
AT1G69500	0.631616	0.101173	0.530443	Same	Same	Same
AT4G02050	0.631945	0.242146	0.389799	Same	Same	Same
AT1G68872	0.631948	0.071988	0.55996	Same	Same	Same
AT4G04078	0.632177	1.18135	0.54917	Same	Same	Same
AT2G32487	0.63266	0.454977	0.177683	Same	Same	Same
AT3G11680	0.632785	-0.122262	0.755047	Opposite	Same	Same
AT3G11920	0.632798	1.89675	1.26396	Same	Same	Same
AT1G55910	0.632808	0.277865	0.354943	Same	Same	Same
AT1G66940	0.632891	0.457232	0.175659	Same	Same	Same
AT3G45420	0.63309	0.616967	0.0161227	Same	Same	Same
AT5G46230	0.633139	0.232939	0.4002	Same	Same	Same
AT3G08760	0.633263	-0.358891	0.992154	Opposite	Same	Same
AT5G03550	0.633466	0.015474	0.617992	Same	Same	Same
AT1G63370	0.633806	0.596479	0.0373268	Same	Same	Same
AT3G54700	0.633932	0.335299	0.298633	Same	Same	Same
AT2G43465	0.634003	0.938253	0.30425	Same	Same	Same
AT2G26700	0.634542	0.020387	0.614155	Same	Same	Same
AT4G37235	0.634713	0.839579	0.204866	Same	Same	Same
AT5G60150	0.635167	0.069313	0.565854	Same	Same	Same
AT1G43260	0.635262	0.450943	0.184319	Same	Same	Same
AT5G10260	0.635267	0.342436	0.292831	Same	Same	Same
AT2G02370	0.635389	0.323419	0.31197	Same	Same	Same
AT1G64385	0.635689	-0.101787	0.737476	Opposite	Same	Same
AT4G39860	0.636053	0.126221	0.509832	Same	Same	Same
AT5G66610	0.63621	0.691638	0.0554285	Same	Same	Same
AT2G29070	0.636396	0.239778	0.396618	Same	Same	Same
AT5G18120	0.636894	0.57203	0.0648645	Same	Same	Same
AT5G28220	0.637715	0.281914	0.355801	Same	Same	Same
AT1G21245	0.637781	0.105296	0.532485	Same	Same	Same
AT2G01650	0.638086	0.644629	0.00654333	Same	Same	Same
AT1G76310	0.638115	1.30486	0.666748	Same	Same	Same
AT1G02800	0.638129	0.077976	0.560153	Same	Same	Same
AT2G44410	0.638384	0.028386	0.609998	Same	Same	Same
AT5G38340	0.638416	-0.207118	0.845534	Opposite	Same	Same
AT1G71900	0.638933	0.241324	0.397609	Same	Same	Same
AT1G75730	0.639865	0.249339	0.390526	Same	Same	Same
AT5G62230	0.64022	1.37792	0.737703	Same	Same	Same
AT5G59530	0.6407	-0.22653	0.86723	Opposite	Same	Same
AT5G26290	0.640763	1.96729	1.32653	Same	Same	Same
AT1G01690	0.641008	0.609335	0.0316728	Same	Same	Same
AT3G12545	0.641407	0.572927	0.0684802	Same	Same	Same
AT3G10780	0.641933	1.05871	0.416775	Same	Same	Same
AT1G73780	0.641936	0.216134	0.425802	Same	Same	Same
AT4G10955	0.642001	0.327231	0.31477	Same	Same	Same
AT1G01260	0.642007	0.182679	0.459328	Same	Same	Same
AT5G27610	0.642171	0.621454	0.0207172	Same	Same	Same
AT2G01180	0.642206	-0.116182	0.758388	Opposite	Same	Same
AT5G39420	0.642289	0.353174	0.289115	Same	Same	Same
AT1G50390	0.642672	0.021568	0.621104	Same	Same	Same
AT4G37990	0.64283	0.599549	0.0432808	Same	Same	Same
AT1G29240	0.64297	0.490447	0.152523	Same	Same	Same
AT4G25160	0.643151	0.231176	0.411975	Same	Same	Same
AT3G46920	0.643343	0.311265	0.332078	Same	Same	Same
AT3G52820	0.643608	1.08535	0.441739	Same	Same	Same
AT5G61090	0.643852	0.656306	0.0124537	Same	Same	Same
AT1G18270	0.643905	0.211212	0.432693	Same	Same	Same
AT4G31350	0.644475	0.99007	0.345595	Same	Same	Same
AT2G45695	0.645033	0.680714	0.0356812	Same	Same	Same
AT3G49120	0.645325	-0.243027	0.888352	Opposite	Same	Same
AT1G59670	0.646211	1.53836	0.89215	Same	Same	Same
AT5G14490	0.647112	0.030483	0.616629	Same	Same	Same
AT1G17590	0.647201	0.111539	0.535662	Same	Same	Same
AT1G50270	0.647207	0.605	0.0422072	Same	Same	Same
AT4G18501	0.647257	0.282104	0.365153	Same	Same	Same
AT5G37530	0.647276	0.210053	0.437223	Same	Same	Same
AT3G45850	0.647526	0.253227	0.394299	Same	Same	Same
AT5G14000	0.647931	0.352161	0.29577	Same	Same	Same
AT3G10113	0.648305	0.806293	0.157988	Same	Same	Same
AT3G63010	0.648403	-0.292107	0.94051	Opposite	Same	Same
AT2G43980	0.648403	0.605786	0.0426173	Same	Same	Same
AT1G24270	0.649074	-0.160795	0.809869	Opposite	Same	Same
AT5G26860	0.649095	0.28902	0.360075	Same	Same	Same
AT3G21720	0.649496	-0.971433	1.62093	Opposite	Opposite	Same
AT1G14910	0.649678	0.08107	0.568608	Same	Same	Same
AT3G42640	0.649768	0.460522	0.189246	Same	Same	Same
AT5G39450	0.649925	0.251789	0.398136	Same	Same	Same
AT4G25515	0.650151	0.380877	0.269274	Same	Same	Same
AT4G33925	0.650325	1.08156	0.431238	Same	Same	Same
AT5G51580	0.650348	0.422307	0.228041	Same	Same	Same
AT1G73165	0.650511	0.69598	0.0454688	Same	Same	Same
AT3G21420	0.650912	0.545541	0.105371	Same	Same	Same
AT3G14510	0.651438	2.8108	2.15936	Same	Same	Same
AT1G79640	0.651846	0.367365	0.284481	Same	Same	Same
AT4G38550	0.652172	0.0414	0.610772	Same	Same	Same
AT4G15450	0.652188	0.698	0.0458117	Same	Same	Same
AT2G01060	0.652892	0.338372	0.31452	Same	Same	Same
AT5G27000	0.652999	0.111288	0.54171	Same	Same	Same
AT5G37920	0.65318	-0.181715	0.834895	Opposite	Same	Same
AT2G13650	0.653437	0.858886	0.205449	Same	Same	Same
AT3G27440	0.654158	-0.814888	1.46905	Opposite	Opposite	Same
AT2G37960	0.654635	0.650757	0.0038775	Same	Same	Same
AT4G39235	0.654718	0.544272	0.110446	Same	Same	Same
AT1G73740	0.654791	0.673434	0.0186427	Same	Same	Same
AT4G24970	0.65486	0.763118	0.108258	Same	Same	Same
AT5G07100	0.65494	-0.208699	0.863639	Opposite	Same	Same
AT3G55470	0.655597	1.07156	0.41596	Same	Same	Same
AT5G54730	0.655657	0.114822	0.540835	Same	Same	Same
AT3G50830	0.656208	0.5789	0.0773083	Same	Same	Same
AT3G18370	0.656218	0.73406	0.0778423	Same	Same	Same
AT2G22500	0.656251	0.19023	0.466021	Same	Same	Same
AT3G46190	0.656464	2.00958	1.35311	Same	Same	Same
AT4G39610	0.656929	0.00064	0.656289	Same	Same	Same
AT5G37180	0.65705	0.371549	0.285501	Same	Same	Same
AT5G67420	0.657075	0.36265	0.294425	Same	Same	Same
AT4G00005	0.657255	-0.132022	0.789277	Opposite	Same	Same
AT4G26070	0.657456	0.73806	0.0806037	Same	Same	Same
AT5G11110	0.657698	0.015776	0.641922	Same	Same	Same
AT3G04903	0.657709	0.15288	0.504829	Same	Same	Same
ATH-MIR39	0.658179	0.641157	0.0170218	Same	Same	Same
AT1G55790	0.658268	0.60841	0.0498585	Same	Same	Same
AT2G46940	0.659237	-0.077421	0.736658	Opposite	Same	Same
AT3G02210	0.659244	0.267496	0.391748	Same	Same	Same
AT4G17483	0.659253	0.422252	0.237001	Same	Same	Same
AT5G23530	0.659495	0.673987	0.0144917	Same	Same	Same
AT3G55880	0.660324	0.437732	0.222592	Same	Same	Same
AT2G31335	0.661673	0.274794	0.386879	Same	Same	Same
ATH-MIR84	0.662459	0.04331	0.619149	Same	Same	Same
AT5G07640	0.662522	0.70069	0.0381677	Same	Same	Same
AT4G38810	0.662698	0.54732	0.115378	Same	Same	Same
AT5G20950	0.662747	0.268955	0.393792	Same	Same	Same
AT1G64020	0.663064	1.21831	0.55525	Same	Same	Same
AT5G09420	0.66317	-0.390888	1.05406	Opposite	Same	Same
AT5G55520	0.663419	-0.18745	0.850869	Opposite	Same	Same
AT5G66910	0.663925	0.40125	0.262675	Same	Same	Same
AT1G29040	0.664026	0.198572	0.465454	Same	Same	Same
AT3G11080	0.664072	0.742064	0.077992	Same	Same	Same
AT4G01730	0.664279	0.056338	0.607941	Same	Same	Same
AT3G11160	0.664493	1.36444	0.699943	Same	Same	Same
AT1G02580	0.665064	-1.14018	1.80525	Opposite	Opposite	Same
AT4G27470	0.665488	0.32775	0.337738	Same	Same	Same
AT3G21780	0.665593	0.142939	0.522654	Same	Same	Same
AT1G44414	0.666036	0.386872	0.279164	Same	Same	Same
AT1G07390	0.666343	0.769589	0.103246	Same	Same	Same
AT3G44800	0.66689	0.323293	0.343597	Same	Same	Same
AT5G40050	0.667182	0.707173	0.0399912	Same	Same	Same
AT2G03670	0.668636	0.556414	0.112222	Same	Same	Same
AT3G47730	0.669012	0.300464	0.368548	Same	Same	Same
AT3G21830	0.669177	-0.017151	0.686328	Opposite	Same	Same
AT5G11870	0.669277	-1.70851	2.37779	Opposite	Opposite	Same
ATH-MIR82	0.669557	0.056098	0.613459	Same	Same	Same
AT1G05740	0.669851	0.034858	0.634993	Same	Same	Same
AT5G06230	0.670244	-0.786615	1.45686	Opposite	Opposite	Same
AT1G17400	0.671017	0.82879	0.157773	Same	Same	Same
AT3G22160	0.672397	0.625334	0.0470633	Same	Same	Same
AT1G80320	0.672449	0.774585	0.102136	Same	Same	Same
AT4G13510	0.672782	0.899472	0.22669	Same	Same	Same
ATMG00470	0.673508	0.702708	0.0292003	Same	Same	Same
AT5G14160	0.673773	0.652588	0.0211855	Same	Same	Same
AT2G36800	0.674059	0.59733	0.0767287	Same	Same	Same
AT2G01540	0.674477	0.165512	0.508966	Same	Same	Same
AT2G44700	0.675354	0.143012	0.532342	Same	Same	Same
AT1G50750	0.67607	-0.136696	0.812766	Opposite	Same	Same
AT3G16980	0.676212	0.216262	0.45995	Same	Same	Same
AT1G07790	0.676268	1.11762	0.441351	Same	Same	Same
AT5G45110	0.676979	0.443567	0.233412	Same	Same	Same
AT2G18770	0.67736	0.512849	0.164511	Same	Same	Same
AT5G36940	0.677585	0.79606	0.118475	Same	Same	Same
AT1G28560	0.677894	0.843971	0.166077	Same	Same	Same
AT1G14120	0.678033	1.09387	0.415838	Same	Same	Same
AT1G25370	0.678153	0.546709	0.131443	Same	Same	Same
AT3G10950	0.678376	1.46173	0.783354	Same	Same	Same
AT2G32795	0.680437	0.830052	0.149615	Same	Same	Same
AT3G50230	0.680654	0.463999	0.216655	Same	Same	Same
AT3G48080	0.68066	0.237357	0.443303	Same	Same	Same
AT2G48150	0.681021	0.208484	0.472537	Same	Same	Same
AT3G24495	0.681238	0.523054	0.158184	Same	Same	Same
AT5G42140	0.681374	0.353092	0.328282	Same	Same	Same
AT1G01310	0.681667	0.668617	0.01305	Same	Same	Same
AT1G34360	0.681762	0.357492	0.32427	Same	Same	Same
AT5G38260	0.681991	0.378816	0.303175	Same	Same	Same
AT5G19750	0.682012	0.46183	0.220182	Same	Same	Same
AT3G63470	0.682224	0.304439	0.377785	Same	Same	Same
AT2G14060	0.682568	-0.118039	0.800607	Opposite	Same	Same
AT1G03240	0.682682	3.17908	2.4964	Same	Same	Same
AT4G33020	0.682792	0.3409	0.341892	Same	Same	Same
AT2G02360	0.683226	0.681185	0.00204083	Same	Same	Same
AT5G07130	0.683558	0.352281	0.331277	Same	Same	Same
AT4G19970	0.684226	-0.256284	0.94051	Opposite	Same	Same
AT3G51890	0.684832	0.567923	0.116909	Same	Same	Same
AT1G60460	0.684889	0.359063	0.325826	Same	Same	Same
AT2G45510	0.684974	0.054846	0.630128	Same	Same	Same
AT4G34330	0.685107	0.545832	0.139276	Same	Same	Same
AT3G61980	0.685885	0.810597	0.124713	Same	Same	Same
AT2G17060	0.686133	0.006646	0.679487	Same	Same	Same
AT5G02640	0.686326	1.62623	0.939903	Same	Same	Same
AT3G46110	0.6868	0.604681	0.0821185	Same	Same	Same
AT1G36580	0.68701	0.176117	0.510893	Same	Same	Same
AT1G34480	0.687588	0.027029	0.660559	Same	Same	Same
AT1G17430	0.687675	0.335576	0.352099	Same	Same	Same
AT5G49570	0.687954	-0.050491	0.738445	Opposite	Same	Same
AT2G20980	0.688375	0.428785	0.25959	Same	Same	Same
AT5G62730	0.689657	-0.040069	0.729726	Opposite	Same	Same
AT1G24150	0.690449	0.138006	0.552443	Same	Same	Same
AT3G27329	0.690591	0	0.690591	#DIV/0!	#DIV/0!	#DIV/0!
AT4G16700	0.690788	-0.093346	0.784134	Opposite	Same	Same
AT5G17760	0.692577	0.42168	0.270897	Same	Same	Same
AT1G01740	0.692705	0.381045	0.31166	Same	Same	Same
AT3G29240	0.692829	0.17039	0.522439	Same	Same	Same
AT5G65710	0.692994	0.862919	0.169925	Same	Same	Same
AT1G33720	0.693794	0.125799	0.567995	Same	Same	Same
AT1G68290	0.69416	0.480813	0.213347	Same	Same	Same
AT5G37480	0.694515	0.773549	0.0790343	Same	Same	Same
AT5G38310	0.696647	0.016093	0.680554	Same	Same	Same
AT4G35500	0.696752	-0.163505	0.860257	Opposite	Same	Same
AT5G66900	0.696949	0.610562	0.0863872	Same	Same	Same
AT1G23120	0.697162	0.094311	0.602851	Same	Same	Same
AT3G20200	0.697501	0.829653	0.132151	Same	Same	Same
AT4G35620	0.697732	-0.223516	0.921248	Opposite	Same	Same
AT3G10660	0.698585	0.634085	0.0644997	Same	Same	Same
AT4G10720	0.698598	0.201438	0.49716	Same	Same	Same
AT5G48175	0.69899	0.162084	0.536906	Same	Same	Same
AT5G18362	0.699141	0.256244	0.442897	Same	Same	Same
AT1G77030	0.70042	-0.567601	1.26802	Opposite	Same	Same
AT2G36050	0.700427	0.888185	0.187758	Same	Same	Same
AT5G49070	0.700873	1.12239	0.421513	Same	Same	Same
AT3G14710	0.700906	-0.759552	1.46046	Opposite	Opposite	Same
AT2G31880	0.701083	0.29819	0.402893	Same	Same	Same
AT1G16970	0.701271	0.507954	0.193317	Same	Same	Same
AT1G29110	0.701518	1.28516	0.583644	Same	Same	Same
AT1G59620	0.701865	0.765534	0.0636695	Same	Same	Same
AT4G29770	0.701914	1.31959	0.617671	Same	Same	Same
AT2G35210	0.70206	0.385938	0.316122	Same	Same	Same
AT4G04460	0.703434	0.405906	0.297528	Same	Same	Same
AT2G19330	0.703909	1.07435	0.370436	Same	Same	Same
AT1G67830	0.704245	0.051646	0.652599	Same	Same	Same
AT2G33260	0.704817	0.043135	0.661682	Same	Same	Same
AT2G30140	0.705041	0.05874	0.646301	Same	Same	Same
AT5G14480	0.705302	0.660651	0.0446513	Same	Same	Same
AT1G06135	0.705968	0.902587	0.196619	Same	Same	Same
AT3G29070	0.705982	0.016502	0.68948	Same	Same	Same
AT5G18220	0.706241	0.078511	0.62773	Same	Same	Same
AT1G04490	0.706424	0.724251	0.0178268	Same	Same	Same
AT3G20015	0.70645	0.590254	0.116196	Same	Same	Same
AT3G49480	0.706463	0.696091	0.0103715	Same	Same	Same
AT1G17490	0.707466	0.688528	0.0189378	Same	Same	Same
AT3G03500	0.708375	0.321366	0.387009	Same	Same	Same
AT3G25610	0.7094	-0.733191	1.44259	Opposite	Opposite	Same
AT4G36515	0.709778	1.40525	0.695471	Same	Same	Same
AT4G10570	0.709957	0.591883	0.118074	Same	Same	Same
AT2G44065	0.710413	0.269436	0.440977	Same	Same	Same
AT4G38980	0.710797	0.792476	0.081679	Same	Same	Same
AT4G23170	0.710837	1.83406	1.12322	Same	Same	Same
AT3G07720	0.710926	0.91954	0.208614	Same	Same	Same
AT2G27920	0.711248	0.649801	0.0614467	Same	Same	Same
AT3G56500	0.711331	-0.035523	0.746854	Opposite	Same	Same
AT2G06050	0.711403	0.536886	0.174517	Same	Same	Same
AT1G11370	0.711516	1.12215	0.410632	Same	Same	Same
AT5G12340	0.712045	1.21209	0.500041	Same	Same	Same
AT3G09830	0.712359	-0.445637	1.158	Opposite	Same	Same
AT5G39493	0.712507	1.06953	0.357019	Same	Same	Same
AT3G56840	0.712716	0.544342	0.168374	Same	Same	Same
AT4G12270	0.713293	1.20876	0.495462	Same	Same	Same
AT3G58460	0.713773	0.689803	0.0239698	Same	Same	Same
AT3G54780	0.71444	0.843458	0.129018	Same	Same	Same
AT2G46440	0.714479	1.8956	1.18112	Same	Same	Same
AT5G27210	0.714613	0.854387	0.139774	Same	Same	Same
AT1G14640	0.714745	1.56658	0.851837	Same	Same	Same
AT1G34540	0.715667	0.422745	0.292922	Same	Same	Same
AT1G15900	0.715711	1.13101	0.415296	Same	Same	Same
AT2G16020	0.715747	0.680845	0.0349023	Same	Same	Same
AT1G07220	0.715771	0.009021	0.70675	Same	Same	Same
AT2G41550	0.715956	0.537388	0.178568	Same	Same	Same
AT4G22530	0.716469	-0.177928	0.894397	Opposite	Same	Same
AT3G57490	0.716997	0.885926	0.168929	Same	Same	Same
AT5G10970	0.717468	0.173984	0.543484	Same	Same	Same
AT5G08680	0.717586	0.222745	0.494841	Same	Same	Same
AT3G16730	0.717743	0.903009	0.185265	Same	Same	Same
AT1G01030	0.717781	0.631797	0.0859843	Same	Same	Same
AT3G48770	0.717951	1.11691	0.398964	Same	Same	Same
AT5G39970	0.718359	0.635833	0.0825263	Same	Same	Same
AT5G47540	0.718434	0.43935	0.279084	Same	Same	Same
AT3G18830	0.718509	-0.09715	0.815659	Opposite	Same	Same
AT3G08870	0.718789	0.650601	0.0681878	Same	Same	Same
AT1G27710	0.719042	0.693959	0.0250825	Same	Same	Same
AT5G61010	0.719718	0.182847	0.536871	Same	Same	Same
AT4G17900	0.71991	0.397234	0.322676	Same	Same	Same
AT1G16160	0.719944	0.649415	0.0705288	Same	Same	Same
AT5G54260	0.721407	1.10385	0.382441	Same	Same	Same
AT4G12710	0.721879	0.216135	0.505744	Same	Same	Same
AJ240063	0.721907	-0.07298	0.794887	Opposite	Same	Same
AT1G55320	0.72232	0.515286	0.207034	Same	Same	Same
AT5G61740	0.722423	-0.251749	0.974172	Opposite	Same	Same
AT1G29560	0.723353	0.747951	0.0245978	Same	Same	Same
AT3G60961	0.723438	-0.535132	1.25857	Opposite	Same	Same
AT2G22660	0.723593	0.334248	0.389345	Same	Same	Same
AT1G10230	0.724062	0.519181	0.204881	Same	Same	Same
AT4G19990	0.724388	0.016813	0.707575	Same	Same	Same
AT3G62620	0.724641	0.925676	0.201035	Same	Same	Same
AT5G23850	0.72465	0.429863	0.294787	Same	Same	Same
AT1G50240	0.724763	0.39134	0.333423	Same	Same	Same
AT1G07410	0.725583	0.599059	0.126524	Same	Same	Same
AT5G18350	0.726316	0.639824	0.0864925	Same	Same	Same
AT2G25370	0.726812	0.319941	0.406871	Same	Same	Same
AT2G36670	0.727251	0.286891	0.44036	Same	Same	Same
AT5G18370	0.727279	0.057671	0.669608	Same	Same	Same
AT2G27389	0.727904	0.560822	0.167083	Same	Same	Same
AT2G34825	0.728704	0.592037	0.136667	Same	Same	Same
AT3G57600	0.728792	0.028252	0.70054	Same	Same	Same
AT1G75390	0.729156	-2.93322	3.66238	Opposite	Opposite	Same
AT5G46915	0.729512	-0.326789	1.0563	Opposite	Same	Same
AT5G01640	0.729828	0.166929	0.562899	Same	Same	Same
AT2G44690	0.7305	1.7778	1.0473	Same	Same	Same
AT3G56320	0.730652	0.616032	0.11462	Same	Same	Same
AJ242536	0.730663	0.836104	0.105441	Same	Same	Same
AT1G22275	0.731025	0.326343	0.404682	Same	Same	Same
AT4G14020	0.73222	-0.352759	1.08498	Opposite	Same	Same
AT1G01710	0.732239	0.698694	0.0335448	Same	Same	Same
AT3G02030	0.732509	0.429232	0.303277	Same	Same	Same
AT1G67940	0.732738	0.77273	0.0399923	Same	Same	Same
AT5G20400	0.732979	-0.274268	1.00725	Opposite	Same	Same
AT4G11530	0.733016	0.198947	0.534069	Same	Same	Same
AT3G26180	0.734259	0.537209	0.19705	Same	Same	Same
AT5G27920	0.734343	-0.653608	1.38795	Opposite	Opposite	Same
AT5G48780	0.734581	0.992673	0.258092	Same	Same	Same
AT1G34120	0.734712	0.114664	0.620048	Same	Same	Same
AT5G15720	0.734881	-0.127973	0.862854	Opposite	Same	Same
AT3G16580	0.735079	0.394406	0.340673	Same	Same	Same
AT1G76994	0.735379	0.109448	0.625931	Same	Same	Same
AT5G46880	0.735724	0.863553	0.127829	Same	Same	Same
AT3G09220	0.736653	0.294574	0.442079	Same	Same	Same
AT1G74080	0.736806	0.327686	0.40912	Same	Same	Same
AT1G13990	0.737116	0.343551	0.393565	Same	Same	Same
AT4G36090	0.737179	0.263075	0.474104	Same	Same	Same
AT4G02005	0.737457	1.42828	0.690821	Same	Same	Same
AT1G78820	0.737537	0.744341	0.0068045	Same	Same	Same
AT5G04930	0.737884	0.208274	0.52961	Same	Same	Same
AT1G71750	0.738213	-0.125372	0.863585	Opposite	Same	Same
AT5G15800	0.738387	-0.288105	1.02649	Opposite	Same	Same
AT1G10920	0.738867	0.28611	0.452757	Same	Same	Same
AT1G69270	0.739324	0.570589	0.168735	Same	Same	Same
AT5G25770	0.73945	-0.649388	1.38884	Opposite	Opposite	Same
AT4G13660	0.739661	-1.26021	1.99988	Opposite	Opposite	Same
AT1G05030	0.739998	0.499436	0.240562	Same	Same	Same
AT4G20830	0.740317	-0.006157	0.746474	Opposite	Same	Same
AT1G60830	0.740788	0.054663	0.686125	Same	Same	Same
AT1G21270	0.740891	0.493718	0.247173	Same	Same	Same
AT1G78090	0.7409	-0.397182	1.13808	Opposite	Same	Same
AT1G66020	0.741493	0.249696	0.491797	Same	Same	Same
AT5G18360	0.741834	0.86518	0.123346	Same	Same	Same
AT5G02610	0.742074	0.494086	0.247988	Same	Same	Same
AT1G11500	0.742384	0.610128	0.132256	Same	Same	Same
AT3G05380	0.742724	0.372778	0.369946	Same	Same	Same
AT4G34480	0.743081	0.192133	0.550948	Same	Same	Same
AT5G15870	0.743152	0.029329	0.713823	Same	Same	Same
AT2G23149	0.74385	0.253483	0.490367	Same	Same	Same
AT3G14780	0.744463	0.212741	0.531722	Same	Same	Same
AT4G37530	0.745069	-0.109502	0.854571	Opposite	Same	Same
AT5G14930	0.745968	0.726575	0.0193933	Same	Same	Same
AT1G43810	0.746569	0.67907	0.0674988	Same	Same	Same
AT4G23010	0.74673	0.021039	0.725691	Same	Same	Same
AT4G18990	0.746874	0.175709	0.571165	Same	Same	Same
AT2G22820	0.747209	0.906706	0.159497	Same	Same	Same
AT1G07120	0.747296	0.602282	0.145014	Same	Same	Same
AT1G32340	0.747718	0.594723	0.152995	Same	Same	Same
AT1G77720	0.748279	0.424222	0.324057	Same	Same	Same
AT4G21720	0.748714	0.577167	0.171547	Same	Same	Same
AT2G01310	0.748937	0.05471	0.694227	Same	Same	Same
AT1G18990	0.749574	2.30705	1.55748	Same	Same	Same
AT2G21730	0.750004	1.39771	0.647706	Same	Same	Same
AT4G37740	0.750228	0.471609	0.278619	Same	Same	Same
AT2G05760	0.750444	0.481089	0.269355	Same	Same	Same
AT2G36710	0.750892	-0.029162	0.780054	Opposite	Same	Same
AT3G60520	0.75091	1.31461	0.563698	Same	Same	Same
AT3G19040	0.751019	0.882931	0.131912	Same	Same	Same
AT4G19645	0.75133	0.309751	0.441579	Same	Same	Same
AT1G29300	0.75174	0.887085	0.135345	Same	Same	Same
AT2G39710	0.751845	-0.329265	1.08111	Opposite	Same	Same
AT4G21600	0.752078	0.87489	0.122812	Same	Same	Same
AT4G22212	0.752311	-0.10115	0.853461	Opposite	Same	Same
AT3G63320	0.753734	0.685357	0.0683773	Same	Same	Same
AT2G35035	0.754075	-0.125607	0.879682	Opposite	Same	Same
AT4G14840	0.754513	0.342459	0.412054	Same	Same	Same
AT5G34940	0.754863	0.203483	0.55138	Same	Same	Same
AT1G26530	0.754984	-0.294159	1.04914	Opposite	Same	Same
AT1G06050	0.755057	0.540856	0.214201	Same	Same	Same
AT2G21350	0.755476	0.376825	0.378651	Same	Same	Same
AT4G08700	0.755512	0.54404	0.211472	Same	Same	Same
AT1G67650	0.75595	0.246675	0.509275	Same	Same	Same
AT1G17560	0.756479	0.498133	0.258346	Same	Same	Same
AT3G61610	0.756831	0.336964	0.419867	Same	Same	Same
AT1G05220	0.757643	-0.13569	0.893333	Opposite	Same	Same
AT1G69520	0.758087	-0.281986	1.04007	Opposite	Same	Same
AT1G76070	0.758317	0.304125	0.454192	Same	Same	Same
AT1G56030	0.758892	0.447502	0.31139	Same	Same	Same
AT1G12210	0.759228	0.420301	0.338927	Same	Same	Same
AT4G37290	0.759637	-0.285385	1.04502	Opposite	Same	Same
AT5G65920	0.759849	0.54652	0.213329	Same	Same	Same
AT3G08720	0.760258	0.328405	0.431853	Same	Same	Same
AT1G49032	0.760389	0.746708	0.0136815	Same	Same	Same
AT1G72280	0.760463	1.00905	0.248591	Same	Same	Same
AT1G41880	0.761085	0.928775	0.16769	Same	Same	Same
AT5G53780	0.761487	-0.145585	0.907072	Opposite	Same	Same
AT5G08380	0.761698	-0.065175	0.826873	Opposite	Same	Same
AT5G45900	0.762036	0.15426	0.607776	Same	Same	Same
AT5G07070	0.762537	0.987754	0.225217	Same	Same	Same
AT1G22500	0.762557	0.009619	0.752938	Same	Same	Same
AT3G11820	0.762678	0.275363	0.487315	Same	Same	Same
AT3G48570	0.762723	0.462719	0.300004	Same	Same	Same
AT5G13190	0.763583	0.4176	0.345983	Same	Same	Same
AT1G52315	0.763643	-0.176595	0.940238	Opposite	Same	Same
AT3G15550	0.764706	0.191096	0.573611	Same	Same	Same
AT1G20780	0.76559	0.497484	0.268106	Same	Same	Same
AT4G18880	0.765746	0.302856	0.46289	Same	Same	Same
AT1G08310	0.7662	-0.233981	1.00018	Opposite	Same	Same
AT2G29470	0.766295	-0.358257	1.12455	Opposite	Same	Same
AT4G16350	0.767856	1.03807	0.270212	Same	Same	Same
AT1G68200	0.768066	0.43937	0.328696	Same	Same	Same
AT5G28390	0.768635	0.459632	0.309003	Same	Same	Same
AT3G19260	0.768767	0.956963	0.188196	Same	Same	Same
AT1G72240	0.768856	0.969721	0.200865	Same	Same	Same
AT5G60630	0.769286	0.568281	0.201005	Same	Same	Same
AT2G34010	0.769805	0.618256	0.151549	Same	Same	Same
AT1G33850	0.769987	0.311219	0.458768	Same	Same	Same
AT2G30505	0.770222	0.680474	0.0897482	Same	Same	Same
AT1G08450	0.771892	0.302185	0.469708	Same	Same	Same
AT5G55150	0.771984	-0.104547	0.876531	Opposite	Same	Same
AT3G22580	0.772218	2.45317	1.68095	Same	Same	Same
AT5G37830	0.772816	0.187632	0.585184	Same	Same	Same
AT1G09890	0.773823	0.28679	0.487033	Same	Same	Same
AT3G63280	0.77404	0.842143	0.068103	Same	Same	Same
AT3G22910	0.775129	1.04464	0.269508	Same	Same	Same
AT3G05600	0.775977	0.908513	0.132536	Same	Same	Same
AT4G36520	0.776401	0.8395	0.0630995	Same	Same	Same
AT5G23490	0.776814	0.546624	0.23019	Same	Same	Same
AT2G17040	0.777752	1.46597	0.68822	Same	Same	Same
AT5G65550	0.77802	0.20523	0.57279	Same	Same	Same
AT5G66320	0.778858	0.242259	0.536599	Same	Same	Same
AT5G65130	0.77886	0.439057	0.339803	Same	Same	Same
AT4G22760	0.779817	0.675069	0.104748	Same	Same	Same
AT1G69720	0.779844	2.84092	2.06107	Same	Same	Same
AT2G19710	0.781274	0.271017	0.510257	Same	Same	Same
AT3G59570	0.781918	0.196288	0.58563	Same	Same	Same
AT2G17120	0.782343	0.200597	0.581746	Same	Same	Same
AT5G51400	0.78261	0.550372	0.232238	Same	Same	Same
AT2G44910	0.782761	1.20666	0.423903	Same	Same	Same
AT4G30980	0.783194	1.25538	0.472189	Same	Same	Same
AT1G77330	0.783892	1.02335	0.239456	Same	Same	Same
AT1G02930	0.783994	-0.491926	1.27592	Opposite	Same	Same
AT1G65850	0.784385	0.684758	0.0996272	Same	Same	Same
AT1G05040	0.785465	0.020678	0.764787	Same	Same	Same
AT4G04960	0.785586	0.46552	0.320066	Same	Same	Same
AT3G07060	0.786477	0.257648	0.528829	Same	Same	Same
AT2G35650	0.78691	0.58881	0.1981	Same	Same	Same
AT1G13330	0.789752	-0.274919	1.06467	Opposite	Same	Same
AT2G27390	0.789845	0.03492	0.754926	Same	Same	Same
AT5G40316	0.789969	1.02717	0.237196	Same	Same	Same
AT5G54650	0.790233	0.122598	0.667635	Same	Same	Same
AT5G44460	0.790541	0.435518	0.355023	Same	Same	Same
AT5G22840	0.791025	0.523349	0.267676	Same	Same	Same
AT4G30230	0.791313	0.688521	0.102792	Same	Same	Same
AT5G35580	0.791673	0.075781	0.715891	Same	Same	Same
AT2G36026	0.791912	0.235384	0.556528	Same	Same	Same
AT4G01010	0.792888	0.22603	0.566858	Same	Same	Same
AT5G17210	0.793092	0.599921	0.193171	Same	Same	Same
AT1G72700	0.793298	-0.021665	0.814963	Opposite	Same	Same
AT4G24800	0.794043	0.770516	0.0235273	Same	Same	Same
AT1G78922	0.794281	1.03494	0.240661	Same	Same	Same
AT4G27270	0.794324	0.650788	0.143536	Same	Same	Same
AT5G01900	0.794521	0.151386	0.643135	Same	Same	Same
AT1G13680	0.795619	1.22924	0.43362	Same	Same	Same
AT4G11840	0.795627	0.678049	0.117578	Same	Same	Same
AT1G04050	0.796088	1.84218	1.0461	Same	Same	Same
AT1G62500	0.796434	-0.202179	0.998612	Opposite	Same	Same
AT4G12280	0.796526	1.47853	0.682004	Same	Same	Same
ATMG00830	0.796587	0.582484	0.214103	Same	Same	Same
AT5G47920	0.797178	-0.191556	0.988734	Opposite	Same	Same
AT4G29810	0.797231	0.534818	0.262413	Same	Same	Same
AT2G29940	0.797331	0.357174	0.440157	Same	Same	Same
AT5G50200	0.797722	0.429377	0.368345	Same	Same	Same
AT1G13530	0.797956	0.680472	0.117484	Same	Same	Same
AT3G20420	0.798439	0.646664	0.151775	Same	Same	Same
AT5G52990	0.799027	0.364917	0.43411	Same	Same	Same
AT1G70870	0.799348	1.70212	0.902772	Same	Same	Same
AT4G28390	0.799688	-0.731814	1.5315	Opposite	Opposite	Same
AT5G54095	0.800426	0.955501	0.155075	Same	Same	Same
AT1G23340	0.800832	0.976797	0.175965	Same	Same	Same
AT4G28490	0.801157	0.028907	0.77225	Same	Same	Same
AT3G17626	0.801747	0.851456	0.0497088	Same	Same	Same
AT4G02800	0.801951	0.497509	0.304442	Same	Same	Same
AT1G04920	0.804017	-0.32535	1.12937	Opposite	Same	Same
AT1G75420	0.804413	0.548053	0.25636	Same	Same	Same
AT2G26310	0.804827	0.047604	0.757223	Same	Same	Same
AT3G20600	0.806768	1.40327	0.596501	Same	Same	Same
AT1G48605	0.807248	-0.046799	0.854047	Opposite	Same	Same
AT4G28800	0.807256	0.633297	0.173959	Same	Same	Same
AT2G18000	0.807743	0.408977	0.398766	Same	Same	Same
AT3G45200	0.808032	1.12614	0.318107	Same	Same	Same
AT3G49370	0.808348	0.675675	0.132673	Same	Same	Same
AT3G56400	0.80854	1.12271	0.31417	Same	Same	Same
AT2G14580	0.809217	-0.034432	0.843649	Opposite	Same	Same
AT5G64401	0.809535	0.3569	0.452635	Same	Same	Same
AT1G62300	0.810161	0.179904	0.630257	Same	Same	Same
AT1G28640	0.810418	0.513065	0.297353	Same	Same	Same
AT1G62320	0.810789	-0.300559	1.11135	Opposite	Same	Same
AT1G21520	0.812002	0.192622	0.61938	Same	Same	Same
AT1G78730	0.815188	0.616849	0.198339	Same	Same	Same
AT5G52070	0.816104	1.44676	0.630659	Same	Same	Same
AT5G24510	0.816156	0.40629	0.409867	Same	Same	Same
AT1G29330	0.818127	0.677682	0.140445	Same	Same	Same
AT3G62590	0.819721	0.352504	0.467217	Same	Same	Same
AT1G76110	0.819922	0.70186	0.118062	Same	Same	Same
AT5G02380	0.820751	0.74955	0.0712005	Same	Same	Same
AT5G37000	0.821472	1.13157	0.310103	Same	Same	Same
AT5G44390	0.821678	0.134811	0.686867	Same	Same	Same
AT5G42690	0.822792	0.286471	0.536321	Same	Same	Same
AT5G62998	0.823651	0.672583	0.151068	Same	Same	Same
AT3G08990	0.823835	0.501338	0.322497	Same	Same	Same
AT1G21250	0.824897	0.885036	0.0601385	Same	Same	Same
AT4G03570	0.825845	1.28196	0.45612	Same	Same	Same
AT2G41380	0.826389	0.284342	0.542047	Same	Same	Same
AT3G17630	0.826959	0.362578	0.46438	Same	Same	Same
AT3G59210	0.82696	1.0077	0.180742	Same	Same	Same
AT4G17695	0.827317	0.845984	0.0186667	Same	Same	Same
AT1G68935	0.82775	0.643753	0.183997	Same	Same	Same
AT3G22070	0.828287	1.00309	0.174803	Same	Same	Same
AT4G02220	0.82894	0.129604	0.699336	Same	Same	Same
AT1G64630	0.830239	-0.172195	1.00243	Opposite	Same	Same
AT1G63050	0.83044	0.96433	0.13389	Same	Same	Same
AT5G17580	0.830674	0.976836	0.146162	Same	Same	Same
AT1G31200	0.830955	0.832302	0.00134733	Same	Same	Same
AT5G56960	0.831673	0.432051	0.399622	Same	Same	Same
AT1G48635	0.831968	0.771087	0.0608815	Same	Same	Same
AT4G27860	0.832785	0.445243	0.387542	Same	Same	Same
AT4G02390	0.834863	0.255398	0.579465	Same	Same	Same
AT3G44190	0.835657	1.18982	0.354163	Same	Same	Same
AT5G42010	0.835976	0.720427	0.115549	Same	Same	Same
AT2G21580	0.838124	0.46203	0.376094	Same	Same	Same
AT5G54850	0.839302	0.96648	0.127178	Same	Same	Same
AT5G06960	0.840456	0.688408	0.152048	Same	Same	Same
AT1G30300	0.841033	0.207219	0.633814	Same	Same	Same
AT1G30755	0.841039	0.4197	0.42134	Same	Same	Same
AT2G17780	0.841114	0.367176	0.473938	Same	Same	Same
AT5G18670	0.841155	0.34635	0.494805	Same	Same	Same
AT4G12120	0.841758	1.06387	0.222114	Same	Same	Same
AT1G23010	0.841776	1.01572	0.17394	Same	Same	Same
AT3G04220	0.841948	-0.426179	1.26813	Opposite	Same	Same
AT1G51960	0.843295	0.72165	0.121646	Same	Same	Same
AT1G21930	0.843446	-0.119947	0.963393	Opposite	Same	Same
AT3G58000	0.84375	-0.72068	1.56443	Opposite	Opposite	Same
AT1G01660	0.843779	1.43069	0.586913	Same	Same	Same
AT1G09415	0.844397	0.798938	0.0454588	Same	Same	Same
AT2G36305	0.845392	0.50916	0.336232	Same	Same	Same
AT5G06750	0.846035	0.020994	0.825041	Same	Same	Same
AT4G25630	0.846444	-0.247814	1.09426	Opposite	Same	Same
AT4G39890	0.846698	1.24032	0.393625	Same	Same	Same
AT2G41070	0.847088	0.620888	0.2262	Same	Same	Same
AT2G45490	0.848395	0.039245	0.809149	Same	Same	Same
AT3G07520	0.848806	-0.285797	1.1346	Opposite	Same	Same
AT4G27080	0.849146	0.713531	0.135615	Same	Same	Same
AT4G20820	0.849206	0.758043	0.091163	Same	Same	Same
AT4G24710	0.84924	0.788741	0.0604987	Same	Same	Same
AT2G32645	0.849631	0.723532	0.126099	Same	Same	Same
AT1G63530	0.850625	-0.486815	1.33744	Opposite	Same	Same
AT3G17690	0.851208	-0.114624	0.965832	Opposite	Same	Same
AT2G17620	0.851282	0.27672	0.574562	Same	Same	Same
AT4G22780	0.852078	0.635622	0.216456	Same	Same	Same
AT1G07901	0.8524	1.64142	0.789025	Same	Same	Same
AT4G36460	0.852499	-0.013834	0.866333	Opposite	Same	Same
AT5G24200	0.852919	0.63041	0.222509	Same	Same	Same
AT5G53550	0.853109	-0.148155	1.00126	Opposite	Same	Same
AT4G04078	0.853281	1.18135	0.328066	Same	Same	Same
ATH-MIR84	0.854134	0.04331	0.810824	Same	Same	Same
AT5G09690	0.854269	-0.257082	1.11135	Opposite	Same	Same
AT1G15370	0.854592	0.00743	0.847162	Same	Same	Same
AT1G24145	0.854607	0.540519	0.314088	Same	Same	Same
AT1G67920	0.855264	0.5027	0.352564	Same	Same	Same
AT3G26600	0.855873	0.354859	0.501014	Same	Same	Same
AT1G68710	0.855956	0.31906	0.536896	Same	Same	Same
AT4G18490	0.856204	0.927876	0.071672	Same	Same	Same
AT1G04090	0.856546	0.872948	0.016402	Same	Same	Same
AT4G04450	0.857352	1.27402	0.416665	Same	Same	Same
AT3G27510	0.858326	0.069803	0.788523	Same	Same	Same
AT4G23030	0.858742	-0.596938	1.45568	Opposite	Opposite	Same
AT2G31110	0.85878	0.184214	0.674566	Same	Same	Same
AT5G46350	0.858792	-0.72423	1.58302	Opposite	Opposite	Same
AT4G22070	0.858844	1.49168	0.632841	Same	Same	Same
AT2G40205	0.859142	0.375508	0.483634	Same	Same	Same
AT5G44568	0.859556	1.25029	0.390738	Same	Same	Same
AT2G47190	0.859913	-0.039715	0.899628	Opposite	Same	Same
AT2G33580	0.860009	0.211632	0.648377	Same	Same	Same
AT1G51760	0.860776	0.464749	0.396027	Same	Same	Same
AT3G57260	0.860937	0.183462	0.677475	Same	Same	Same
AT4G39670	0.863175	0.305526	0.557649	Same	Same	Same
AT3G52390	0.86398	0.530358	0.333622	Same	Same	Same
AT3G54960	0.864533	0.25092	0.613613	Same	Same	Same
AT4G32730	0.864587	0.599202	0.265385	Same	Same	Same
AT3G09490	0.864839	0.197742	0.667097	Same	Same	Same
AT4G12440	0.864881	1.88008	1.0152	Same	Same	Same
AT3G13080	0.865677	-0.003793	0.86947	Opposite	Same	Same
AT2G46070	0.865763	0.257891	0.607872	Same	Same	Same
AT4G30870	0.867413	0.156421	0.710992	Same	Same	Same
AT1G14880	0.868258	3.66494	2.79668	Same	Same	Same
AT4G22790	0.868338	0.420962	0.447376	Same	Same	Same
AT3G48310	0.868594	0.3896	0.478994	Same	Same	Same
AT5G12380	0.86898	0.830332	0.0386483	Same	Same	Same
AT4G22280	0.871139	1.32675	0.455611	Same	Same	Same
AT2G44460	0.871457	2.06674	1.19528	Same	Same	Same
AT2G20110	0.872125	0.21806	0.654065	Same	Same	Same
AT4G16940	0.872278	0.101637	0.770641	Same	Same	Same
AT1G64185	0.872315	0.759686	0.112629	Same	Same	Same
AT2G28960	0.872422	0.872138	0.000283667	Same	Same	Same
AT5G14870	0.872942	0.141773	0.731169	Same	Same	Same
AT5G61980	0.872979	0.866963	0.00601633	Same	Same	Same
AT3G11840	0.873485	0.301084	0.572401	Same	Same	Same
AT5G49630	0.874988	0.911875	0.0368873	Same	Same	Same
AT1G47840	0.876914	0.08521	0.791704	Same	Same	Same
AT1G29860	0.876972	-0.391422	1.26839	Opposite	Same	Same
AT3G44660	0.877905	-0.175145	1.05305	Opposite	Same	Same
AT1G74440	0.878394	2.20782	1.32942	Same	Same	Same
AT4G00020	0.878513	1.02358	0.145072	Same	Same	Same
AT4G23700	0.878697	-0.512589	1.39129	Opposite	Same	Same
AT1G50180	0.878833	0.894711	0.0158777	Same	Same	Same
AT3G01710	0.879564	0.827144	0.0524205	Same	Same	Same
AT4G18010	0.881465	-0.186235	1.0677	Opposite	Same	Same
AT1G12100	0.881828	1.53167	0.649839	Same	Same	Same
AT1G72900	0.881849	-0.030248	0.912098	Opposite	Same	Same
AT2G46080	0.881983	0.649965	0.232018	Same	Same	Same
AT5G38240	0.882337	2.24646	1.36412	Same	Same	Same
AT5G05435	0.883667	0.961564	0.0778973	Same	Same	Same
AT3G55950	0.884025	0.484344	0.399681	Same	Same	Same
AT1G68700	0.884152	0.759605	0.124547	Same	Same	Same
AT1G64480	0.884373	1.45012	0.565748	Same	Same	Same
AT4G19200	0.884731	0.147248	0.737483	Same	Same	Same
AT4G04220	0.88619	0.861577	0.0246132	Same	Same	Same
AT5G24230	0.886366	0.879104	0.00726183	Same	Same	Same
AT4G34900	0.886594	1.29019	0.403593	Same	Same	Same
AT2G30480	0.88663	0.813652	0.0729782	Same	Same	Same
AT1G61160	0.88664	0.987032	0.100392	Same	Same	Same
AT2G19040	0.886643	0.479883	0.40676	Same	Same	Same
AT3G25905	0.887979	-0.130758	1.01874	Opposite	Same	Same
AT3G09010	0.88888	0.19114	0.69774	Same	Same	Same
AT5G24960	0.889509	1.09502	0.205512	Same	Same	Same
AT1G78770	0.890821	0.417038	0.473783	Same	Same	Same
AT4G12860	0.891004	2.16425	1.27324	Same	Same	Same
AT5G36970	0.891678	0.080056	0.811622	Same	Same	Same
AT3G29410	0.891703	1.17105	0.279344	Same	Same	Same
AT1G73680	0.892082	0.642448	0.249634	Same	Same	Same
AT3G43840	0.892501	3.77686	2.88435	Same	Same	Same
AT1G79680	0.894189	0.051397	0.842792	Same	Same	Same
AT1G52920	0.894533	2.11047	1.21594	Same	Same	Same
AT1G08420	0.894886	-0.09007	0.984956	Opposite	Same	Same
AT5G41180	0.895987	0.802291	0.0936963	Same	Same	Same
AT1G49050	0.896306	0.124718	0.771588	Same	Same	Same
AT5G03260	0.896783	0.005353	0.89143	Same	Same	Same
AT1G61490	0.896931	-0.339702	1.23663	Opposite	Same	Same
AT5G37570	0.897464	1.39075	0.493282	Same	Same	Same
AT4G12080	0.897731	-0.512038	1.40977	Opposite	Same	Same
AT5G42380	0.897919	0.227874	0.670045	Same	Same	Same
AT1G17610	0.899344	2.02123	1.12189	Same	Same	Same
AT5G61190	0.899801	0.786379	0.113422	Same	Same	Same
AT5G41680	0.900162	1.16828	0.268121	Same	Same	Same
AT1G20350	0.900186	0.770426	0.12976	Same	Same	Same
AT1G52590	0.900572	1.184	0.283426	Same	Same	Same
AT3G12070	0.90098	1.40184	0.500855	Same	Same	Same
AT3G51350	0.901753	1.76492	0.863169	Same	Same	Same
AT2G33130	0.902251	0.665537	0.236714	Same	Same	Same
AT4G00955	0.902396	0.287933	0.614463	Same	Same	Same
AT5G10100	0.902804	0.519141	0.383663	Same	Same	Same
AT4G14640	0.903269	0.210342	0.692927	Same	Same	Same
AT5G51850	0.903945	0.856368	0.0475775	Same	Same	Same
AT5G07200	0.904454	0.425375	0.479079	Same	Same	Same
AT3G56730	0.904473	0.341909	0.562564	Same	Same	Same
AT4G15075	0.905267	0.021389	0.883878	Same	Same	Same
AT2G38860	0.905976	-0.138774	1.04475	Opposite	Same	Same
AT3G27480	0.907166	0.482398	0.424768	Same	Same	Same
AT5G46390	0.90726	0.8181	0.0891602	Same	Same	Same
AT1G80900	0.907262	0.900772	0.0064905	Same	Same	Same
AT3G48320	0.907509	0.944264	0.0367555	Same	Same	Same
AT5G26940	0.907533	1.00257	0.0950385	Same	Same	Same
AT1G48280	0.909139	0.493172	0.415967	Same	Same	Same
AT3G16565	0.910708	0.590628	0.32008	Same	Same	Same
AT1G14860	0.911075	0.261044	0.650031	Same	Same	Same
AT3G12830	0.912101	0.191412	0.720689	Same	Same	Same
AT4G01440	0.912212	-0.069234	0.981446	Opposite	Same	Same
AT5G18780	0.915355	0.407984	0.507371	Same	Same	Same
AT5G44820	0.916573	0.414667	0.501906	Same	Same	Same
AT2G16850	0.917426	0.275712	0.641714	Same	Same	Same
AT1G64360	0.917572	0.51385	0.403722	Same	Same	Same
AT3G60176	0.919379	1.1033	0.183916	Same	Same	Same
AT5G13430	0.920249	0.331795	0.588454	Same	Same	Same
AT1G56510	0.920276	-0.312979	1.23325	Opposite	Same	Same
AT1G16670	0.921596	0.163349	0.758247	Same	Same	Same
AT2G33000	0.921785	0.920006	0.00177917	Same	Same	Same
AT1G65890	0.921824	2.55119	1.62937	Same	Same	Same
AT2G44290	0.921855	0.622893	0.298962	Same	Same	Same
AT3G10530	0.92216	1.27871	0.356547	Same	Same	Same
AT5G53280	0.922227	1.07152	0.149292	Same	Same	Same
AT4G08990	0.922278	0.621048	0.30123	Same	Same	Same
AT4G18375	0.922953	1.83908	0.916125	Same	Same	Same
AT1G58300	0.925079	0.36627	0.558809	Same	Same	Same
AT2G35820	0.927685	0.584598	0.343087	Same	Same	Same
AT5G39100	0.928614	1.24081	0.3122	Same	Same	Same
AT4G37490	0.929168	0.06879	0.860378	Same	Same	Same
AT2G21900	0.929329	0.580431	0.348898	Same	Same	Same
AT5G51530	0.929532	1.84096	0.911431	Same	Same	Same
AT1G05570	0.929849	0.040909	0.88894	Same	Same	Same
AT3G25880	0.931439	0.14479	0.786649	Same	Same	Same
AT5G26340	0.932912	0.075429	0.857482	Same	Same	Same
AT5G65500	0.933277	0.400332	0.532945	Same	Same	Same
AT2G38350	0.9342	1.7426	0.808396	Same	Same	Same
AT3G28540	0.934273	2.02405	1.08978	Same	Same	Same
AT2G46950	0.934274	1.24499	0.310715	Same	Same	Same
AT4G11850	0.935582	0.539188	0.396394	Same	Same	Same
AT2G46060	0.935833	0.591519	0.344314	Same	Same	Same
AT4G31805	0.938137	-0.217948	1.15609	Opposite	Same	Same
AT4G24050	0.939805	0.980367	0.0405617	Same	Same	Same
AT5G46440	0.939878	1.66028	0.720398	Same	Same	Same
AT2G26170	0.940871	0.30352	0.637351	Same	Same	Same
AT5G28320	0.941172	0.538149	0.403023	Same	Same	Same
AT4G01870	0.941991	-0.101112	1.0431	Opposite	Same	Same
AT5G45280	0.944527	0.66305	0.281477	Same	Same	Same
AT1G62770	0.944623	0.604328	0.340295	Same	Same	Same
AT1G02360	0.944992	0.54354	0.401452	Same	Same	Same
AT1G12015	0.946107	0.965849	0.0197425	Same	Same	Same
AT2G40050	0.948741	0.349901	0.59884	Same	Same	Same
AT4G27860	0.948851	0.445243	0.503608	Same	Same	Same
AT2G43550	0.948894	0.874021	0.0748733	Same	Same	Same
AT1G17744	0.949672	0.543329	0.406343	Same	Same	Same
AT2G40960	0.950879	1.23367	0.282793	Same	Same	Same
AT3G13500	0.950894	0.090758	0.860136	Same	Same	Same
AT4G36990	0.9509	-0.375981	1.32688	Opposite	Same	Same
AT3G49780	0.951065	-0.09137	1.04243	Opposite	Same	Same
AT1G71050	0.951535	-0.413652	1.36519	Opposite	Same	Same
AT1G13710	0.9555	1.10145	0.145952	Same	Same	Same
AT1G67800	0.957124	0.767727	0.189397	Same	Same	Same
AT4G23130	0.957681	1.04529	0.0876095	Same	Same	Same
AT1G65483	0.958563	-0.263875	1.22244	Opposite	Same	Same
AT3G57710	0.958635	-0.374788	1.33342	Opposite	Same	Same
AT1G56418	0.959108	0.023602	0.935506	Same	Same	Same
AT1G73810	0.959214	0.10476	0.854454	Same	Same	Same
AT1G11270	0.959239	0.313554	0.645685	Same	Same	Same
AT1G78190	0.959731	0.631074	0.328657	Same	Same	Same
AT1G52100	0.960538	1.77487	0.814328	Same	Same	Same
AT4G22214	0.960727	-0.24069	1.20142	Opposite	Same	Same
AT5G18730	0.961244	1.05199	0.0907488	Same	Same	Same
AT5G16350	0.962112	1.27048	0.308368	Same	Same	Same
AT2G24680	0.962191	0.732303	0.229888	Same	Same	Same
AT4G23160	0.962467	0.29138	0.671087	Same	Same	Same
AT2G20720	0.962744	0.512797	0.449947	Same	Same	Same
AT4G08740	0.962783	0.566135	0.396648	Same	Same	Same
AT3G22070	0.962947	1.00309	0.0401435	Same	Same	Same
AT3G02840	0.967528	0.113847	0.853681	Same	Same	Same
AT5G37340	0.968846	1.13701	0.168167	Same	Same	Same
AT2G22820	0.96901	0.906706	0.0623043	Same	Same	Same
AT3G20440	0.969365	0.954964	0.0144005	Same	Same	Same
AT3G21770	0.969898	-0.498524	1.46842	Opposite	Same	Same
AT5G43020	0.970475	1.00214	0.0316648	Same	Same	Same
AT3G19660	0.970727	0.257275	0.713452	Same	Same	Same
AT1G13520	0.971299	-0.470585	1.44188	Opposite	Same	Same
AT5G56300	0.97355	-0.129822	1.10337	Opposite	Same	Same
AT4G26270	0.973959	0.015015	0.958944	Same	Same	Same
AT4G04601	0.974526	0.145633	0.828893	Same	Same	Same
AT2G18120	0.978889	1.64295	0.66406	Same	Same	Same
AT2G04040	0.979849	0.618878	0.360971	Same	Same	Same
AT3G43800	0.980672	0.70509	0.275582	Same	Same	Same
AT3G50470	0.981053	0.782525	0.198528	Same	Same	Same
AT1G63245	0.981285	0.342542	0.638743	Same	Same	Same
AT1G15790	0.982132	0.79086	0.191272	Same	Same	Same
AT4G34610	0.982643	0.875668	0.106975	Same	Same	Same
AT4G01360	0.983051	0.289136	0.693915	Same	Same	Same
AT1G53000	0.9836	0.968728	0.0148717	Same	Same	Same
AT5G47220	0.984224	0.576229	0.407995	Same	Same	Same
AT5G48400	0.984426	-0.263331	1.24776	Opposite	Same	Same
AT5G16360	0.984534	-0.080137	1.06467	Opposite	Same	Same
AT1G22550	0.984738	0.488959	0.495778	Same	Same	Same
AT1G05630	0.984936	-0.175514	1.16045	Opposite	Same	Same
AT5G06390	0.985589	0.363644	0.621945	Same	Same	Same
AT4G35480	0.987047	0.194915	0.792132	Same	Same	Same
AT3G58020	0.98726	1.00512	0.017855	Same	Same	Same
AT4G15400	0.987825	-0.453682	1.44151	Opposite	Same	Same
AT2G46430	0.988145	0.663374	0.324771	Same	Same	Same
AT2G25000	0.988185	0.352396	0.635789	Same	Same	Same
AT4G21950	0.988473	-0.037526	1.026	Opposite	Same	Same
AT4G33270	0.989052	0.280043	0.709009	Same	Same	Same
AT5G50790	0.990064	-0.686188	1.67625	Opposite	Opposite	Same
AT3G01970	0.991225	-0.47304	1.46426	Opposite	Same	Same
AT1G59865	0.991244	1.29576	0.304519	Same	Same	Same
AT1G31290	0.991578	-0.514981	1.50656	Opposite	Same	Same
AT4G20110	0.99182	0.09638	0.89544	Same	Same	Same
AT4G04220	0.9924	0.861577	0.130823	Same	Same	Same
AT5G13490	0.99329	0.007637	0.985653	Same	Same	Same
AT3G16510	0.993732	0.881421	0.112311	Same	Same	Same
AT1G09995	0.99391	1.01895	0.0250412	Same	Same	Same
AT5G25930	0.995124	-0.295506	1.29063	Opposite	Same	Same
AT3G62160	0.995397	1.14919	0.153795	Same	Same	Same
AT5G49290	0.996336	0.703776	0.29256	Same	Same	Same
AT5G65070	0.996502	1.67719	0.68069	Same	Same	Same
AT4G04840	0.997505	1.1772	0.179695	Same	Same	Same
AT1G55265	0.999555	1.05412	0.054567	Same	Same	Same
AT1G79890	1.00087	1.20911	0.208238	Same	Same	Same
AT4G06598	1.00148	1.13277	0.131287	Same	Same	Same
AT1G20380	1.0021	0.524481	0.477621	Same	Same	Same
AT1G69920	1.00218	0.153673	0.848504	Same	Same	Same
AT3G52430	1.0023	0.652306	0.349998	Same	Same	Same
AT4G40020	1.00307	-0.203565	1.20664	Opposite	Same	Same
AT5G45520	1.00318	-0.219917	1.22309	Opposite	Same	Same
AT1G64610	1.00365	-0.006265	1.00991	Opposite	Same	Same
AT2G07170	1.00414	0.572152	0.431985	Same	Same	Same
AT2G31990	1.00485	0.488722	0.516124	Same	Same	Same
AT1G69710	1.00622	1.04981	0.0435967	Same	Same	Same
AT1G05370	1.00714	0.910347	0.0967978	Same	Same	Same
AT1G01670	1.00754	1.44993	0.442388	Same	Same	Same
AT1G34420	1.00851	0.298928	0.709581	Same	Same	Same
AT5G45240	1.00927	0.94608	0.0631918	Same	Same	Same
ATH-MIR39	1.00938	0.641157	0.368219	Same	Same	Same
AT1G59590	1.01105	0.632439	0.378607	Same	Same	Same
AT5G63730	1.0138	-0.01038	1.02418	Opposite	Same	Same
AT4G23240	1.01401	-1.60998	2.62399	Opposite	Opposite	Opposite
AT2G20453	1.01412	0.4176	0.596522	Same	Same	Same
AT1G70950	1.01442	0.469876	0.544544	Same	Same	Same
AT5G05460	1.01517	0.443531	0.571637	Same	Same	Same
AT1G17600	1.01554	1.01217	0.00336717	Same	Same	Same
AT3G20960	1.0166	0.455042	0.56156	Same	Same	Same
AT1G56240	1.01682	1.53241	0.515592	Same	Same	Same
AT3G23880	1.01701	1.20949	0.192484	Same	Same	Same
AT1G72120	1.01758	0.905161	0.112424	Same	Same	Same
AT3G05690	1.01827	0.793854	0.224411	Same	Same	Same
AT3G13437	1.02041	0.37456	0.645851	Same	Same	Same
AT3G57200	1.02144	0.158004	0.863436	Same	Same	Same
AT4G01750	1.02169	0.587908	0.433783	Same	Same	Same
AT4G26060	1.02174	0.713278	0.308462	Same	Same	Same
AT4G13572	1.02221	1.22821	0.205995	Same	Same	Same
AT3G05830	1.02418	0.952641	0.0715347	Same	Same	Same
AT5G11210	1.02507	-1.4858	2.51087	Opposite	Opposite	Opposite
AT2G04420	1.02525	-0.033054	1.0583	Opposite	Same	Same
AT4G26990	1.02548	0.648385	0.377092	Same	Same	Same
AT1G11800	1.02587	1.34421	0.318346	Same	Same	Same
AT4G34400	1.02727	-1.37822	2.40549	Opposite	Opposite	Opposite
AT5G40780	1.02742	0.11075	0.916665	Same	Same	Same
AT1G79530	1.03137	1.13692	0.105546	Same	Same	Same
AT1G18910	1.03266	0.48133	0.551327	Same	Same	Same
AT1G69485	1.03328	1.52161	0.48833	Same	Same	Same
AT3G43790	1.03329	2.56255	1.52926	Same	Same	Same
AT1G30420	1.03373	-0.046667	1.0804	Opposite	Same	Same
AT4G33390	1.03382	0.873353	0.160467	Same	Same	Same
AT1G61415	1.03392	0.363952	0.669972	Same	Same	Same
AT2G46270	1.03393	0.278406	0.755527	Same	Same	Same
AT5G37740	1.03664	-0.157434	1.19408	Opposite	Same	Same
AT1G12340	1.03913	0.600821	0.438304	Same	Same	Same
AT3G28155	1.03918	1.80804	0.768852	Same	Same	Same
AT1G03710	1.0424	1.5356	0.493199	Same	Same	Same
ATH-MIR84	1.04266	0.04331	0.999347	Same	Same	Same
AT5G15220	1.04297	0.720904	0.322066	Same	Same	Same
AT3G52400	1.04405	-0.156562	1.20061	Opposite	Same	Same
AT3G18550	1.04439	-0.414789	1.45918	Opposite	Same	Same
AT3G01720	1.04464	0.527503	0.517133	Same	Same	Same
AT2G21550	1.04603	0.593555	0.452476	Same	Same	Same
AT4G34750	1.04708	0.896481	0.150601	Same	Same	Same
AT1G53920	1.04815	0.49775	0.550395	Same	Same	Same
AT3G19210	1.04914	0.168481	0.880662	Same	Same	Same
AT2G18938	1.05023	0.062685	0.987543	Same	Same	Same
AT1G26380	1.05136	-0.311658	1.36301	Opposite	Same	Same
AT5G13330	1.05246	-0.180681	1.23314	Opposite	Same	Same
AT4G05475	1.0525	1.75465	0.702144	Same	Same	Same
AT5G43910	1.05403	0.168898	0.885131	Same	Same	Same
AT1G72420	1.0545	1.19239	0.137883	Same	Same	Same
AT1G03990	1.055	0.903078	0.151918	Same	Same	Same
AT1G69120	1.05581	-0.353241	1.40905	Opposite	Same	Same
AT2G36295	1.05653	0.227494	0.829039	Same	Same	Same
AT5G22590	1.05719	0.430219	0.626966	Same	Same	Same
AT1G14080	1.0578	-0.398521	1.45632	Opposite	Same	Same
AT1G01210	1.05867	1.61801	0.559335	Same	Same	Same
AT1G67330	1.05905	0.342926	0.716128	Same	Same	Same
AT4G18630	1.05977	0.319859	0.739911	Same	Same	Same
AT2G15220	1.06127	0.289024	0.772245	Same	Same	Same
AT5G54490	1.06229	0.761954	0.300336	Same	Same	Same
AT4G39830	1.06259	0.435676	0.626912	Same	Same	Same
AT5G48657	1.06349	0.284558	0.778937	Same	Same	Same
AT5G57510	1.06395	0.619713	0.444242	Same	Same	Same
AT1G22340	1.0655	1.04211	0.0233863	Same	Same	Same
AT2G37750	1.06631	-0.144271	1.21058	Opposite	Same	Same
AT1G50400	1.06641	0.651351	0.415059	Same	Same	Same
AT3G11402	1.06797	0.401402	0.666571	Same	Same	Same
AT5G55380	1.06825	1.85146	0.783212	Same	Same	Same
AT5G41160	1.0687	0.266048	0.802656	Same	Same	Same
AT3G60540	1.07123	0.409938	0.661289	Same	Same	Same
AT2G04100	1.07202	1.15185	0.0798215	Same	Same	Same
AT2G04090	1.07211	-2.60334	3.67545	Opposite	Opposite	Opposite
AT5G17320	1.07384	0.618161	0.455676	Same	Same	Same
AT4G34930	1.07533	0.902855	0.172473	Same	Same	Same
AJ240076	1.0757	1.4845	0.4088	Same	Same	Same
AT3G51430	1.07607	0.365049	0.71102	Same	Same	Same
AT4G33970	1.07737	0.447573	0.629793	Same	Same	Same
AT2G16530	1.0774	-0.033567	1.11097	Opposite	Same	Same
AT2G41835	1.07791	0.465297	0.612613	Same	Same	Same
AT5G56730	1.07954	1.26004	0.180493	Same	Same	Same
AT3G21520	1.08286	-0.279653	1.36251	Opposite	Same	Same
AT5G07770	1.08364	1.10599	0.022354	Same	Same	Same
AT1G02440	1.08601	0.217357	0.868653	Same	Same	Same
AT4G10890	1.08663	0.390195	0.696436	Same	Same	Same
AT3G60580	1.08673	-0.189391	1.27612	Opposite	Same	Same
AT1G06620	1.08717	0.468067	0.619101	Same	Same	Same
AT4G34580	1.08733	0.794536	0.292794	Same	Same	Same
AT1G53542	1.08776	1.35172	0.263961	Same	Same	Same
AT1G03950	1.0882	0.99334	0.094859	Same	Same	Same
AT5G39750	1.08829	0.930003	0.158286	Same	Same	Same
AT5G51480	1.08864	-0.13333	1.22197	Opposite	Same	Same
AT4G09880	1.08956	0.606977	0.48258	Same	Same	Same
AT1G74430	1.08974	1.40763	0.317884	Same	Same	Same
AT4G37900	1.09038	-0.012457	1.10284	Opposite	Same	Same
AT4G10410	1.0909	0.501399	0.589504	Same	Same	Same
AT5G02670	1.09159	0.612407	0.479182	Same	Same	Same
AT2G39210	1.09312	-0.08489	1.17801	Opposite	Same	Same
AT1G47560	1.0934	1.16572	0.0723133	Same	Same	Same
AT3G13782	1.09359	1.38813	0.294536	Same	Same	Same
AT5G19880	1.09501	-0.60784	1.70285	Opposite	Opposite	Same
AT5G01870	1.09744	-0.430889	1.52833	Opposite	Same	Same
AT5G60800	1.09798	0.858665	0.239311	Same	Same	Same
AT5G23930	1.09802	1.86239	0.764368	Same	Same	Same
AT2G25964	1.09919	1.21115	0.111961	Same	Same	Same
AT2G28755	1.09958	-0.747426	1.84701	Opposite	Opposite	Same
AT5G52760	1.09973	0.449601	0.650127	Same	Same	Same
AT4G17180	1.10044	0.304836	0.795601	Same	Same	Same
AT5G16170	1.10062	0.605646	0.494979	Same	Same	Same
AT2G28160	1.10081	1.38926	0.288443	Same	Same	Same
AT3G47040	1.10111	-0.237219	1.33833	Opposite	Same	Same
AT4G04223	1.10463	2.17888	1.07424	Same	Same	Same
AT1G51890	1.10487	-0.766543	1.87142	Opposite	Opposite	Same
AT4G28460	1.10508	-0.138965	1.24404	Opposite	Same	Same
AT2G24300	1.10528	0.838182	0.2671	Same	Same	Same
AT2G20142	1.10566	0.548032	0.557628	Same	Same	Same
AT4G21850	1.10593	-0.547505	1.65343	Opposite	Same	Same
AT4G34380	1.10682	0.579739	0.527083	Same	Same	Same
AT1G09480	1.11067	1.15708	0.0464155	Same	Same	Same
AT5G36220	1.11132	0.5341	0.577218	Same	Same	Same
AT1G07780	1.11285	1.53142	0.41858	Same	Same	Same
AT4G15165	1.11431	1.39208	0.277765	Same	Same	Same
AT3G04060	1.11718	0.706751	0.410426	Same	Same	Same
AT3G29970	1.12055	0.011929	1.10862	Same	Same	Same
AT5G64000	1.12061	-0.347865	1.46848	Opposite	Same	Same
AT3G30769	1.12121	2.24144	1.12022	Same	Same	Same
AT3G15590	1.12213	0.911344	0.210788	Same	Same	Same
AT3G28500	1.12283	-0.422716	1.54555	Opposite	Same	Same
AT2G40095	1.12396	0.202474	0.92149	Same	Same	Same
AT4G37700	1.12428	0.494411	0.629871	Same	Same	Same
AT1G16420	1.12456	1.23632	0.111759	Same	Same	Same
AT5G45000	1.12472	0.625165	0.499551	Same	Same	Same
AT1G24390	1.12551	1.51838	0.392876	Same	Same	Same
AT1G11070	1.12713	1.49791	0.370785	Same	Same	Same
AT5G22555	1.12743	-0.048644	1.17607	Opposite	Same	Same
AT3G47300	1.1277	1.22119	0.0934978	Same	Same	Same
AT3G14610	1.12793	0.515731	0.612199	Same	Same	Same
AT3G56890	1.13104	2.5549	1.42387	Same	Same	Same
AT5G28310	1.13106	-0.17727	1.30833	Opposite	Same	Same
AT5G15860	1.13161	0.614679	0.51693	Same	Same	Same
AT3G18200	1.13349	0.448996	0.684495	Same	Same	Same
AT5G08460	1.13353	0.422982	0.710548	Same	Same	Same
AT5G11180	1.13666	-0.185582	1.32225	Opposite	Same	Same
AT1G59860	1.13801	0.685464	0.452542	Same	Same	Same
AT1G74590	1.13877	-0.0739	1.21267	Opposite	Same	Same
AT4G15330	1.13879	0.494821	0.64397	Same	Same	Same
AT5G66620	1.139	0.72893	0.410069	Same	Same	Same
AT5G01850	1.13976	0.455164	0.684598	Same	Same	Same
AT2G17036	1.14225	0.911351	0.230898	Same	Same	Same
AT5G52730	1.14364	0.921643	0.222001	Same	Same	Same
AT5G58940	1.14368	0.176628	0.967053	Same	Same	Same
AT1G13750	1.14466	0.40213	0.742527	Same	Same	Same
AT2G20150	1.14496	0.669418	0.475537	Same	Same	Same
AT5G27010	1.14714	2.86724	1.72009	Same	Same	Same
AT5G66640	1.14803	-0.926914	2.07495	Opposite	Opposite	Same
AT4G04490	1.1481	-0.349659	1.49776	Opposite	Same	Same
AT1G33030	1.14815	-0.341178	1.48933	Opposite	Same	Same
AT3G09020	1.15065	0.572803	0.577849	Same	Same	Same
AT3G23637	1.15084	0.293027	0.857809	Same	Same	Same
AT3G52630	1.15166	1.02329	0.128368	Same	Same	Same
AT3G17680	1.15232	0.162462	0.989854	Same	Same	Same
AT2G34500	1.15444	-0.337128	1.49156	Opposite	Same	Same
AT4G22305	1.15496	1.12637	0.0285818	Same	Same	Same
AT5G53870	1.15602	0.711831	0.444191	Same	Same	Same
AT1G17480	1.1621	-0.332611	1.49471	Opposite	Same	Same
AT4G27260	1.16396	0.362281	0.801676	Same	Same	Same
AT2G29720	1.16488	0.635097	0.529778	Same	Same	Same
AT2G32680	1.16555	2.33441	1.16886	Same	Same	Same
AT2G31865	1.1658	0.532308	0.633494	Same	Same	Same
AT2G47130	1.16647	0.165806	1.00066	Same	Same	Same
AT3G21780	1.16761	0.142939	1.02467	Same	Same	Same
AT4G24580	1.16764	1.07361	0.0940317	Same	Same	Same
AT4G35590	1.1679	0.71905	0.448852	Same	Same	Same
AT5G53592	1.16843	-0.171204	1.33964	Opposite	Same	Same
AT5G54400	1.16997	0.596117	0.57385	Same	Same	Same
AT5G05300	1.17097	0.555975	0.614994	Same	Same	Same
AT2G27660	1.17442	0.230991	0.943432	Same	Same	Same
AT2G31945	1.17542	-0.271556	1.44697	Opposite	Same	Same
AT4G35600	1.17785	0.905241	0.272608	Same	Same	Same
AT1G48180	1.18059	1.50379	0.323201	Same	Same	Same
AT2G32030	1.18075	0.623313	0.557432	Same	Same	Same
AT1G61440	1.18083	0.347645	0.833185	Same	Same	Same
AT4G11655	1.18239	-0.076592	1.25898	Opposite	Same	Same
AT5G67450	1.18341	0.405843	0.777567	Same	Same	Same
AT1G78740	1.18389	0.703092	0.480801	Same	Same	Same
AT2G23270	1.18395	-0.813441	1.99739	Opposite	Opposite	Same
AT5G67310	1.18461	-0.760449	1.94506	Opposite	Opposite	Same
AT1G22650	1.18543	0.696454	0.488978	Same	Same	Same
AT3G57740	1.1863	1.4719	0.285602	Same	Same	Same
AT3G49970	1.18667	1.45796	0.27129	Same	Same	Same
AT1G04600	1.18856	1.51704	0.328478	Same	Same	Same
AT4G01430	1.1952	-1.71267	2.90786	Opposite	Opposite	Opposite
AT5G66380	1.19568	1.16717	0.0285148	Same	Same	Same
AT3G10320	1.19824	0.363848	0.834396	Same	Same	Same
AT1G07620	1.19873	0.395092	0.80364	Same	Same	Same
AT1G51790	1.2001	-0.207865	1.40796	Opposite	Same	Same
AT1G69930	1.20196	0.666244	0.535713	Same	Same	Same
AT5G48290	1.20634	0.688464	0.517876	Same	Same	Same
AT3G16460	1.20889	0.324444	0.884445	Same	Same	Same
AT4G23220	1.20931	1.5404	0.331092	Same	Same	Same
AT5G58575	1.21027	1.41433	0.204064	Same	Same	Same
AT4G23280	1.21159	-0.668911	1.8805	Opposite	Opposite	Same
AT1G23840	1.21254	2.55131	1.33878	Same	Same	Same
AT1G45145	1.21406	0.86651	0.347547	Same	Same	Same
AT3G45130	1.21462	0.606863	0.607757	Same	Same	Same
AT5G17880	1.21489	1.05514	0.159743	Same	Same	Same
AT1G01560	1.21531	0.629091	0.586217	Same	Same	Same
AT1G71140	1.21639	0.628721	0.58767	Same	Same	Same
AT1G78955	1.21852	0.186501	1.03202	Same	Same	Same
AT1G03660	1.22309	1.10458	0.118505	Same	Same	Same
AT5G07322	1.2236	0.670262	0.553338	Same	Same	Same
AT1G75170	1.22479	0.391279	0.83351	Same	Same	Same
AT3G59830	1.22614	0.738603	0.487533	Same	Same	Same
AT5G24760	1.22711	0.493822	0.733286	Same	Same	Same
AT1G50190	1.22782	1.09733	0.130493	Same	Same	Same
AT2G02340	1.22966	0.198068	1.03159	Same	Same	Same
AT5G45380	1.2303	1.77099	0.540691	Same	Same	Same
AT1G24140	1.23093	0.137732	1.0932	Same	Same	Same
AT3G21530	1.23109	0.996737	0.234351	Same	Same	Same
AT1G08050	1.23115	0.797585	0.433562	Same	Same	Same
AT5G54140	1.23147	0.612722	0.618746	Same	Same	Same
AT4G15280	1.23266	0.73838	0.494284	Same	Same	Same
AT3G14460	1.23359	0.959319	0.274272	Same	Same	Same
AT2G21910	1.24079	0.001581	1.23921	Same	Same	Same
AT2G19980	1.24131	0.269844	0.971463	Same	Same	Same
AT4G27050	1.24257	1.15284	0.0897317	Same	Same	Same
AT1G74360	1.24339	0.064259	1.17913	Same	Same	Same
AT1G24147	1.24592	1.78387	0.53795	Same	Same	Same
AT3G50930	1.24651	0.072203	1.17431	Same	Same	Same
AT4G18430	1.24685	1.11445	0.132401	Same	Same	Same
AT1G69750	1.24716	0.875536	0.371619	Same	Same	Same
AT1G69810	1.24726	0.029512	1.21775	Same	Same	Same
AT2G04430	1.24862	1.20441	0.0442187	Same	Same	Same
AT5G60280	1.25057	0.074432	1.17614	Same	Same	Same
AT2G32650	1.25085	2.32284	1.07199	Same	Same	Same
AT1G29290	1.25136	0.114795	1.13656	Same	Same	Same
AT4G09600	1.25441	0.775404	0.479007	Same	Same	Same
AT2G14560	1.25529	3.24993	1.99464	Same	Same	Same
AT2G40740	1.25618	0.566642	0.689542	Same	Same	Same
AT3G48400	1.25623	-0.254585	1.51081	Opposite	Same	Same
AT1G10040	1.25741	0.798551	0.458864	Same	Same	Same
AT2G44230	1.25915	0.7732	0.485949	Same	Same	Same
AT5G45150	1.25922	0.743249	0.515971	Same	Same	Same
AT1G71400	1.25945	-0.376163	1.63561	Opposite	Same	Same
AT1G12940	1.26264	0.626923	0.635715	Same	Same	Same
AT4G04180	1.26372	1.62297	0.359244	Same	Same	Same
AT2G15480	1.26456	1.22405	0.040511	Same	Same	Same
AT5G23570	1.26492	1.084	0.180916	Same	Same	Same
AT2G41082	1.26704	0.412789	0.854254	Same	Same	Same
AT3G59750	1.26714	0.55555	0.711594	Same	Same	Same
AT1G62760	1.26913	-1.33428	2.60341	Opposite	Opposite	Opposite
AT2G05270	1.26933	3.88429	2.61496	Same	Same	Same
AT5G40855	1.27163	1.53176	0.260133	Same	Same	Same
AT1G33840	1.2725	1.34202	0.069525	Same	Same	Same
AT5G61250	1.27635	0.715091	0.561259	Same	Same	Same
AT5G52540	1.27681	0.840113	0.436699	Same	Same	Same
AT3G46500	1.27774	0.008914	1.26883	Same	Same	Same
AT1G57750	1.27785	-0.305225	1.58308	Opposite	Same	Same
AT1G61420	1.27851	1.19598	0.0825328	Same	Same	Same
AT4G16690	1.27993	0.95005	0.329882	Same	Same	Same
AT5G45730	1.28001	2.30899	1.02898	Same	Same	Same
AT5G27660	1.28025	2.01293	0.732682	Same	Same	Same
AT3G13950	1.28072	-1.73934	3.02005	Opposite	Opposite	Opposite
AT5G44620	1.28352	0.184948	1.09857	Same	Same	Same
AT5G28380	1.28381	0.71812	0.565688	Same	Same	Same
AT1G30900	1.28449	0.560055	0.724434	Same	Same	Same
AT2G37975	1.28548	0.93901	0.346468	Same	Same	Same
AT5G57650	1.28604	-0.607473	1.89351	Opposite	Opposite	Same
AT1G75390	1.28629	-2.93322	4.21951	Opposite	Opposite	Opposite
AT4G04695	1.28674	1.61682	0.330076	Same	Same	Same
AT5G62770	1.28801	0.629968	0.658041	Same	Same	Same
AT5G13840	1.28854	0.384015	0.904529	Same	Same	Same
AT3G04181	1.29101	1.07779	0.213226	Same	Same	Same
AT3G43930	1.29218	0.953114	0.339071	Same	Same	Same
AT2G45220	1.29426	-0.080823	1.37508	Opposite	Same	Same
AT3G47090	1.29434	0.459244	0.835096	Same	Same	Same
AT3G47350	1.29794	1.458	0.160056	Same	Same	Same
AT2G07000	1.30177	3.37858	2.07682	Same	Same	Same
AT5G49680	1.30309	0.297843	1.00525	Same	Same	Same
AT4G23610	1.30319	0.307915	0.99527	Same	Same	Same
AT2G29100	1.30622	0.157303	1.14892	Same	Same	Same
AT3G53150	1.30771	-0.678291	1.986	Opposite	Opposite	Same
AT3G26500	1.30949	0.08166	1.22783	Same	Same	Same
AT3G60966	1.31067	0.294579	1.01609	Same	Same	Same
AT4G23810	1.3154	0.029539	1.28586	Same	Same	Same
AT2G25090	1.31656	0.804234	0.512322	Same	Same	Same
AT5G55560	1.31805	-0.194121	1.51217	Opposite	Same	Same
AT1G75700	1.31831	0.633876	0.684437	Same	Same	Same
AT4G23320	1.31864	0.477308	0.841332	Same	Same	Same
AT3G47480	1.32058	1.1581	0.162484	Same	Same	Same
AT5G54610	1.32337	3.78426	2.46089	Same	Same	Same
AT3G63480	1.32424	1.42272	0.0984807	Same	Same	Same
AT5G19100	1.32853	1.96927	0.640747	Same	Same	Same
AT5G29231	1.32859	0.28336	1.04523	Same	Same	Same
AT3G25780	1.32995	-0.176598	1.50654	Opposite	Same	Same
AT4G14390	1.33015	0.391712	0.938442	Same	Same	Same
AT2G18193	1.33335	-1.65378	2.98713	Opposite	Opposite	Opposite
AT3G13790	1.33388	0.279281	1.0546	Same	Same	Same
AT5G57567	1.33519	2.00384	0.668647	Same	Same	Same
[truncated: 412 more rows]
