# Supplementary material for: Transcriptomic and Metabolomic Analysis of a Pseudomonas-Resistant versus a Susceptible Arabidopsis Accession
Source: Int J Mol Sci. 2022 Oct 11;23(20):12087. doi: 10.3390/ijms232012087 (PMC9603445; doi:10.3390/ijms232012087)
Supplement: Supplementary file 1 [file ijms-23-12087-s001.zip › Supplemental Table S6.xlsx]

## Sheet: 2h
Table S6: Shared differentially expressed genes related to defense responses in Col-0 and C24 after Pst infection.
Affymetrix ST 1.0 Probe	New locus	2h Col-0 Mock	4h Col-0 Mock	8h Col-0 Mock	16h Col-0 Mock	24h Col-0 Mock	48h Col-0 Mock	2h Col-0 Pst	4h Col-0 Pst	8h Col-0 Pst	16h Col-0 Pst	24h Col-0 Pst	48h Col-0 Pst	2h C24 Mock	4h C24 Mock	8h C24 Mock	16h C24 Mock	24h C24 Mock	48h C24 Mock	2h C24 Pst	4h C24 Pst	8h C24 Pst	16h C24 Pst	24h C24 Pst	48h C24 Pst	2h C24 Mock - Col-0 Mock	4h C24 Mock - Col-0 Mock	8h C24 Mock - Col-0 Mock	16h C24 Mock - Col-0 Mock	24h C24 Mock - Col-0 Mock	48h C24 Mock - Col-0 Mock	2h Col-0 Pst - Mock	4h Col-0 Pst - Mock	8h Col-0 Pst - Mock	16h Col-0 Pst - Mock	24h Col-0 Pst - Mock	48h Col-0 Pst - Mock	2h C24 Pst - Mock	4h C24 Pst - Mock	8h C24 Pst - Mock	16h C24 Pst - Mock	24h C24 Pst - Mock	48h C24 Pst - Mock	2h C24 Pst - Col-0 Pst (each Mock subtracted)	4h C24 Pst - Col-0 Pst (each Mock subtracted)	8h C24 Pst - Col-0 Pst (each Mock subtracted)	16h C24 Pst - Col-0 Pst (each Mock subtracted)	24h C24 Pst - Col-0 Pst (each Mock subtracted)	48h C24 Pst - Col-0 Pst (each Mock subtracted)
13336428	AT1G06100	6.96077	6.13714	6.31444	6.71726	6.48262	6.50404	5.8622	6.8897	6.15921	6.30119	6.94432	7.61495	5.1834	5.60892	6.2637	6.17208	6.31225	6.13215	6.01515	5.98785	6.51447	5.67873	6.07434	5.7021	-1.77738	-0.528215	-0.050747	-0.545186	-0.170379	-0.371888	-1.09858	0.752559	-0.155232	-0.416069	0.461699	1.11091	0.83175	0.378926	0.250774	-0.493345	-0.237908	-0.430053	1.93033	-0.373633	0.406006	-0.077276	-0.699607	-1.54096
13337645	AT1G08860	3.96238	4.10083	3.82822	3.80777	3.80785	3.74959	3.26393	3.92739	3.20145	3.8216	3.31532	4.42949	5.92144	3.88179	4.0743	4.27453	3.11443	4.26471	6.57491	4.3806	3.64898	4.16021	4.18927	4.68307	1.95907	-0.219039	0.246076	0.46676	-0.693411	0.515113	-0.698441	-0.173439	-0.62677	0.013827	-0.492523	0.679896	0.653464	0.498808	-0.425319	-0.114323	1.07484	0.418365	1.3519	0.672247	0.201451	-0.12815	1.56736	-0.261531
13353261	AT1G58340	3.47097	3.451	3.55519	3.55784	3.63964	3.61267	4.75603	3.52048	3.33541	3.43799	3.53682	4.88558	3.63754	3.58902	3.73581	3.99868	4.27087	3.56852	4.44064	4.01289	4.36906	4.32576	3.8624	6.02006	0.166578	0.138026	0.180614	0.440841	0.631233	-0.044143	1.28506	0.069487	-0.219787	-0.119844	-0.102819	1.27291	0.803099	0.423869	0.633248	0.327078	-0.408471	2.45153	-0.481961	0.354382	0.853035	0.446922	-0.305652	1.17862
13354180	AT1G61800	6.99134	6.27948	5.56	5.18392	6.18375	6.45961	7.6425	7.61838	6.89834	6.03339	7.85495	9.21194	9.08917	8.13059	7.14378	7.78859	7.37824	8.5311	9.87295	9.22416	7.99319	8.41109	8.68196	9.80399	2.09783	1.85111	1.58378	2.60467	1.1945	2.07149	0.651164	1.3389	1.33835	0.849474	1.6712	2.75233	0.783785	1.09357	0.849415	0.622505	1.30371	1.27289	0.132621	-0.245333	-0.488934	-0.226969	-0.367492	-1.47944
13355762	AT1G66350	5.86398	6.10271	6.5392	6.78412	5.8977	5.55466	5.28697	5.44148	6.12436	6.40233	6.17863	6.02963	5.54469	5.55301	5.77877	6.00885	5.75313	5.78171	4.81394	5.73065	6.29284	6.36371	5.69925	5.99857	-0.319288	-0.549699	-0.760426	-0.775271	-0.144564	0.227042	-0.577014	-0.661234	-0.414834	-0.381794	0.280934	0.474964	-0.730754	0.177637	0.514066	0.354856	-0.053881	0.216864	-0.15374	0.838871	0.9289	0.73665	-0.334815	-0.2581
13362363	AT1G02450	5.4082	5.21163	5.355	4.64921	4.58397	5.66521	6.10001	4.63978	6.81804	4.07332	7.27857	8.03204	6.31025	7.77401	8.81606	7.79013	7.67711	7.89682	7.00381	8.73797	8.56144	8.01956	8.57852	8.10822	0.902049	2.56238	3.46106	3.14092	3.09314	2.23161	0.6918	-0.571854	1.46304	-0.575887	2.6946	2.36684	0.693554	0.963958	-0.254623	0.229432	0.901409	0.211401	0.001754	1.53581	-1.71766	0.805319	-1.79319	-2.15544
13368466	AT1G15520	7.00984	6.21121	5.99746	6.20161	5.98167	6.07115	8.18219	7.55926	6.94442	6.52004	8.817	10.3656	9.78294	8.60355	7.63012	9.20808	8.37528	9.57958	10.6889	9.79143	8.8253	9.85919	9.84395	11.0452	2.7731	2.39234	1.63266	3.00647	2.39362	3.50843	1.17234	1.34805	0.946962	0.318433	2.83533	4.29444	0.905916	1.18788	1.19519	0.651111	1.46867	1.4656	-0.266429	-0.160166	0.248225	0.332678	-1.36666	-2.82884
13369973	AT1G19250	4.66197	5.6159	4.85433	5.22194	5.17384	4.60368	5.44096	6.09611	6.90316	4.92452	8.35194	9.94892	7.9173	8.18992	7.50605	8.12506	7.64038	9.26207	8.9897	8.9934	8.62522	9.27121	9.79995	10.603	3.25532	2.57402	2.65172	2.90313	2.46654	4.65838	0.778983	0.480211	2.04883	-0.297423	3.1781	5.34523	1.0724	0.803485	1.11917	1.14614	2.15957	1.34096	0.29342	0.323274	-0.929664	1.44356	-1.01853	-4.00427
13372625	AT1G26380	3.33168	3.12022	2.30432	2.81329	2.93597	2.67319	4.51624	3.90547	3.70285	2.90512	3.01997	2.89863	5.31626	4.34193	3.33596	3.57267	3.50881	3.41119	6.75164	5.8831	4.51889	4.4693	3.80422	3.67444	1.98458	1.22171	1.03163	0.759375	0.572838	0.737998	1.18456	0.785249	1.39853	0.091827	0.084003	0.225437	1.43538	1.54117	1.18293	0.896633	0.295406	0.26325	0.250828	0.755925	-0.215598	0.804806	0.211403	0.037813
13372636	AT1G26420	5.26483	4.96255	3.99771	4.04412	4.46353	3.14533	6.19323	5.39531	6.06168	4.74067	4.41666	4.77022	6.11903	5.76015	5.2664	4.60482	4.4737	4.55778	7.57931	7.10424	6.22661	5.67516	5.63117	4.74948	0.854199	0.7976	1.26869	0.560694	0.010169	1.41245	0.928402	0.432767	2.06397	0.69655	-0.046874	1.62489	1.46028	1.3441	0.960214	1.07035	1.15747	0.191706	0.531876	0.911328	-1.10376	0.3738	1.20435	-1.43318
13374839	AT1G32350	5.19628	5.37453	4.90649	4.78418	5.10256	4.32338	6.17926	6.11326	6.43433	5.54084	6.2023	8.21188	7.84284	7.38048	6.6146	6.6545	6.57704	7.53757	9.02018	8.40305	7.38239	7.79608	7.14635	9.38595	2.64657	2.00595	1.70811	1.87032	1.47449	3.21419	0.982986	0.738726	1.52784	0.756666	1.09975	3.8885	1.17734	1.02256	0.767797	1.14159	0.569312	1.84838	0.194354	0.283839	-0.76004	0.38492	-0.530434	-2.04012
13376019	AT1G42560	3.52685	3.08209	3.14032	3.16856	3.7247	2.85354	2.75621	2.87423	3.38772	3.20609	3.31958	3.53328	3.77274	3.15519	2.94466	3.13789	3.93622	3.55554	2.83656	3.29653	3.26393	3.24205	3.43145	3.29398	0.245893	0.073094	-0.195659	-0.030668	0.211524	0.701996	-0.770642	-0.20786	0.247401	0.03753	-0.405112	0.679743	-0.936177	0.141346	0.319267	0.104158	-0.504769	-0.261554	-0.165535	0.349206	0.071866	0.066628	-0.099657	-0.941297
13376637	AT1G47510	4.66241	4.66425	4.62762	5.03901	6.8847	7.60355	5.57672	5.35973	5.33736	4.49843	7.02504	8.27952	4.95493	4.48358	4.48248	5.48525	6.42735	5.48239	5.59745	4.99883	5.74488	5.25942	6.22841	8.6243	0.292526	-0.180672	-0.145133	0.446244	-0.457352	-2.12116	0.914315	0.695484	0.709745	-0.540581	0.140333	0.675963	0.642513	0.515258	1.2624	-0.225829	-0.198944	3.14192	-0.271802	-0.180226	0.552652	0.314752	-0.339277	2.46595
13378857	AT1G52890	5.79756	6.25838	6.59356	5.18463	5.91861	6.7142	6.63446	6.72369	6.54521	5.92272	7.34782	9.55929	6.01731	6.79168	7.16981	5.18879	5.88921	6.94187	7.65754	7.59228	7.25324	7.14661	7.12512	9.54218	0.219743	0.5333	0.576254	0.004164	-0.029409	0.227669	0.836894	0.465306	-0.048349	0.738095	1.4292	2.84509	1.64024	0.8006	0.083431	1.95782	1.23592	2.60031	0.803343	0.335294	0.13178	1.21973	-0.193286	-0.244774
13381138	AT1G59950	4.22197	3.46023	3.74497	4.28621	4.31176	3.60175	3.49478	4.92387	3.65981	3.70088	4.10105	3.29686	3.76056	4.11896	3.22636	4.56801	3.81461	4.33895	5.60852	4.13339	4.15094	4.81502	5.46578	4.57313	-0.46141	0.658732	-0.518608	0.281802	-0.497154	0.737198	-0.727189	1.46365	-0.085156	-0.58533	-0.21071	-0.304891	1.84796	0.014429	0.924584	0.247005	1.65117	0.234183	2.57515	-1.44922	1.00974	0.832335	1.86188	0.539074
13385887	AT1G70880	3.7401	3.82375	4.31654	4.28175	4.40117	3.81237	4.64087	3.97363	3.96714	3.83648	4.20838	3.6597	3.80467	3.10967	3.63249	3.72453	3.41821	3.39634	3.06383	3.67586	3.32816	3.55286	3.42773	3.78631	0.064578	-0.714074	-0.684053	-0.557225	-0.982964	-0.416032	0.900779	0.149884	-0.349403	-0.445275	-0.192793	-0.152665	-0.740842	0.566192	-0.304332	-0.171665	0.009521	0.389975	-1.64162	0.416308	0.045071	0.27361	0.202314	0.54264
13389720	AT1G79680	6.03665	5.70313	5.75156	5.28286	5.02983	4.63033	6.91205	6.65659	6.32501	6.29187	6.28895	7.51993	6.97499	6.60754	6.21665	6.40218	5.54056	6.05757	7.72416	6.93295	6.64316	7.4177	6.22719	7.394	0.938339	0.904409	0.465089	1.11933	0.510727	1.42725	0.8754	0.953467	0.573448	1.00901	1.25912	2.8896	0.749173	0.325416	0.426506	1.01551	0.686633	1.33642	-0.126227	-0.628051	-0.146942	0.0065	-0.572486	-1.55318
13393188	AT2G15490	3.1558	2.92515	3.08812	3.08418	3.18419	3.11407	4.22085	3.49201	3.48841	3.86142	3.1297	3.26561	3.08716	3.07282	3.16792	3.21425	2.76001	3.27471	4.01213	2.98607	3.11921	3.82811	3.13284	3.78999	-0.068638	0.14767	0.079791	0.130064	-0.424178	0.160643	1.06505	0.566857	0.40029	0.777232	-0.054488	0.151539	0.924969	-0.086754	-0.048709	0.613859	0.372824	0.515275	-0.140083	-0.653611	-0.448999	-0.163373	0.427312	0.363736
13401341	AT2G35980	6.32216	5.61547	4.92994	5.20055	5.0075	4.28503	7.3672	6.51398	7.04648	6.0586	6.16193	7.46484	8.96099	7.46699	6.86702	8.01273	7.17554	8.07783	9.75128	8.99821	7.85014	8.53488	7.94561	9.37543	2.63883	1.85152	1.93708	2.81217	2.16804	3.7928	1.04504	0.898507	2.11654	0.858044	1.15444	3.17981	0.790294	1.53122	0.983117	0.522152	0.77007	1.2976	-0.254748	0.632711	-1.13342	-0.335892	-0.384365	-1.88221
13407459	AT2G03300	4.46676	4.12489	4.12427	3.78177	3.99545	4.7589	3.31956	3.86559	3.45369	3.55231	3.78951	4.22286	3.75702	2.99171	3.00061	3.04528	2.72548	3.33611	2.52403	2.84519	2.72675	2.83638	3.07536	3.31989	-0.709732	-1.13318	-1.12366	-0.736485	-1.26996	-1.42279	-1.1472	-0.259299	-0.670578	-0.229461	-0.205934	-0.536036	-1.23299	-0.146523	-0.273868	-0.208903	0.349878	-0.016213	-0.085794	0.112776	0.39671	0.020558	0.555812	0.519823
13409771	AT2G17740	7.54319	7.19544	6.52714	7.30539	6.63155	4.60827	8.17656	8.13548	8.74856	7.61932	6.73978	5.56986	8.45434	7.42054	6.88581	7.5744	6.79572	5.79007	9.1853	8.77755	8.24641	8.15382	7.01908	6.38778	0.911147	0.225109	0.358669	0.269009	0.164166	1.1818	0.633367	0.940047	2.22142	0.313931	0.108222	0.961595	0.730961	1.35701	1.36059	0.579417	0.223359	0.597712	0.097594	0.416962	-0.860824	0.265486	0.115137	-0.363883
13415110	AT2G30750	2.38199	2.51986	2.18807	2.32846	2.24176	2.13449	2.98616	2.81075	4.27025	3.26757	3.07584	3.48624	3.55818	2.98669	2.57949	2.51964	2.37095	2.11087	4.73882	4.37907	3.70771	4.57683	3.12837	2.92215	1.17619	0.466825	0.391424	0.19118	0.129196	-0.023615	0.604161	0.290889	2.08218	0.93911	0.834078	1.35175	1.18064	1.39239	1.12822	2.05719	0.757417	0.81128	0.576476	1.1015	-0.953961	1.11808	-0.076661	-0.540469
13420626	AT2G43000	5.43524	5.86165	5.27573	5.2698	6.44936	6.35359	6.29109	6.6508	6.87295	6.19047	7.47876	8.24035	7.5005	7.78493	7.16826	7.39903	8.04378	8.57723	8.21086	8.13773	7.91384	7.47649	8.70684	9.1229	2.06526	1.92328	1.89253	2.12923	1.59442	2.22364	0.855847	0.789152	1.59722	0.920664	1.0294	1.88676	0.71036	0.352794	0.745582	0.077461	0.663059	0.545673	-0.145487	-0.436358	-0.85164	-0.843203	-0.366336	-1.34109
13420890	AT2G43620	8.84492	9.27483	8.70636	8.23746	7.99178	8.10309	9.77046	10.037	10.4701	9.52794	8.3424	8.07936	7.5233	6.53133	5.35075	5.88784	6.28671	6.2546	8.32711	7.20362	6.57477	5.71631	5.13044	5.4025	-1.32163	-2.7435	-3.35561	-2.34962	-1.70507	-1.84848	0.925537	0.762196	1.76372	1.29048	0.350627	-0.023727	0.803816	0.672285	1.22402	-0.171525	-1.15627	-0.852107	-0.121721	-0.089911	-0.539699	-1.462	-1.5069	-0.82838
13432131	AT3G23240	4.75741	3.93294	4.52924	4.54133	4.507	3.98211	5.63795	4.45319	5.3639	4.48449	4.60673	4.59187	5.05264	5.49954	5.81677	4.42589	4.23625	5.11999	6.47488	6.61981	5.69468	5.64075	4.97443	4.83453	0.295229	1.5666	1.28753	-0.115439	-0.270753	1.13788	0.880545	0.520254	0.834664	-0.056833	0.099736	0.609755	1.42224	1.12027	-0.122091	1.21486	0.738188	-0.285456	0.541699	0.600018	-0.956755	1.27169	0.638452	-0.895211
13432135	AT3G23250	6.67966	6.42179	5.75181	5.25256	5.66316	5.00471	7.32949	6.81468	7.38148	6.27916	6.18027	6.58613	6.59081	6.53309	5.86126	5.28529	5.63369	5.87271	7.9378	7.15133	6.66761	7.19221	6.11644	6.48611	-0.088849	0.111296	0.10945	0.032732	-0.029466	0.868	0.649829	0.392892	1.62967	1.02661	0.517112	1.58142	1.34699	0.618246	0.806344	1.90692	0.482744	0.613401	0.697162	0.225354	-0.823322	0.880313	-0.034368	-0.968022
13433736	AT3G26830	6.47828	6.55619	6.5713	6.21988	5.98194	5.64876	7.89883	8.12749	8.37772	7.40619	7.17373	8.59464	8.89339	8.40542	8.06219	8.46093	7.15857	8.59363	10.0118	9.49856	8.76593	9.40712	7.99582	9.17425	2.41511	1.84924	1.49089	2.24105	1.17663	2.94487	1.42055	1.5713	1.80641	1.1863	1.19179	2.94588	1.11841	1.09313	0.703743	0.946191	0.837249	0.580624	-0.302142	-0.478169	-1.10267	-0.240114	-0.354542	-2.36525
13435626	AT3G44830	3.32297	3.5951	3.32156	3.53346	4.24805	3.73781	4.37389	4.13145	3.92418	4.11459	3.97098	3.82338	4.13103	4.58959	4.29861	3.69844	3.88497	4.24568	4.79363	4.90768	3.79996	4.9627	4.1564	4.91143	0.80806	0.994495	0.977055	0.164984	-0.36308	0.507865	1.05091	0.53635	0.602627	0.581126	-0.277073	0.08557	0.6626	0.318092	-0.498647	1.26426	0.271427	0.665753	-0.388314	-0.218258	-1.10127	0.683134	0.5485	0.580183
13457589	AT3G48850	4.13841	4.59682	3.98314	4.16325	4.46567	4.16916	5.41107	5.57958	5.43768	4.48201	5.66424	7.02393	7.18882	7.28423	6.12051	6.43409	6.2895	7.79258	8.60757	8.45038	7.53531	7.28637	7.28011	9.20052	3.05041	2.68741	2.13737	2.27084	1.82383	3.62342	1.27266	0.982763	1.45453	0.318764	1.19857	2.85476	1.41874	1.16615	1.4148	0.852281	0.990614	1.40794	0.146084	0.183391	-0.03974	0.533517	-0.207954	-1.44682
13458022	AT3G49860	4.43856	4.14067	4.29464	4.54578	4.30997	4.49116	5.09445	4.90517	4.16069	4.5767	4.10715	4.54709	5.1581	4.27316	3.43395	5.23628	4.24445	4.64411	4.49094	4.27077	4.53268	3.9555	4.5471	3.99423	0.719539	0.13249	-0.860683	0.690497	-0.065516	0.152955	0.65589	0.764503	-0.133947	0.030924	-0.202817	0.05594	-0.667163	-0.002386	1.09873	-1.28078	0.30265	-0.649882	-1.32305	-0.766889	1.23267	-1.3117	0.505467	-0.705822
13480733	AT4G01870	6.07136	5.76435	5.76721	5.70648	6.08354	6.6132	6.88189	6.02322	6.23952	5.80877	5.35174	6.76153	7.78733	6.77362	6.5252	6.57271	6.90366	7.09558	9.06936	8.17131	7.05643	7.50522	6.43567	8.12283	1.71597	1.00927	0.757983	0.866227	0.820119	0.48238	0.810532	0.258864	0.472303	0.102286	-0.731794	0.148326	1.28203	1.39769	0.531232	0.932512	-0.467981	1.02725	0.471501	1.13882	0.058929	0.830226	0.263813	0.878923
13494710	AT4G37290	5.27879	4.41853	4.67089	4.73684	4.80516	4.10494	5.88599	4.92788	5.34904	5.42294	5.19038	6.49861	5.35836	6.09941	5.29139	5.86279	5.06886	4.89217	6.97693	5.89095	4.80303	6.74605	5.30418	6.98833	0.079576	1.68088	0.620493	1.12595	0.263695	0.787225	0.607207	0.509348	0.678149	0.686099	0.385218	2.39366	1.61857	-0.208456	-0.488357	0.883257	0.235326	2.09616	1.01136	-0.717804	-1.16651	0.197158	-0.149892	-0.297502
13500977	AT5G13330	7.26197	7.25345	7.37362	6.91356	6.50772	6.75251	7.85718	8.14197	8.27054	7.34412	7.71259	9.31637	8.262	8.20279	8.41665	8.36952	7.47904	7.64757	9.00921	9.31822	9.22689	8.94889	8.454	9.63436	1.00003	0.949334	1.04303	1.45596	0.971328	0.89506	0.595212	0.888519	0.896925	0.430555	1.20487	2.56386	0.747208	1.11543	0.810243	0.579364	0.974954	1.98679	0.151996	0.226912	-0.086682	0.148809	-0.229921	-0.577068
13508989	AT5G40990	5.0277	6.54723	6.25888	6.10009	5.87367	6.29116	6.08795	7.34499	8.00413	5.87057	6.37119	7.11949	5.23282	6.87255	7.49507	5.52237	5.76329	6.04322	6.32625	8.3277	8.3459	5.44905	6.81995	6.94077	0.205118	0.325325	1.23619	-0.577716	-0.110383	-0.247939	1.06025	0.797763	1.74525	-0.229522	0.497518	0.828327	1.09343	1.45514	0.850832	-0.073322	1.05666	0.897547	0.033182	0.65738	-0.894422	0.1562	0.559142	0.06922
13525472	AT5G13080	5.72037	6.4651	5.70109	6.16111	6.02755	4.70029	6.47929	6.64658	7.24851	6.42982	7.24183	8.88986	8.2687	7.91385	7.83796	7.84461	7.21141	7.82324	9.47663	9.18509	8.57076	8.73103	7.8852	9.49973	2.54833	1.44875	2.13687	1.6835	1.18386	3.12295	0.758919	0.181484	1.54742	0.268711	1.21428	4.18958	1.20793	1.27124	0.7328	0.886421	0.673788	1.67649	0.449012	1.08976	-0.814624	0.61771	-0.540492	-2.51309
13527792	AT5G18350	3.84549	4.13661	4.55964	4.11475	4.55428	4.83497	4.53929	4.8854	3.34486	3.85027	4.03	4.87414	4.85403	5.31128	4.95122	5.12283	4.56365	5.60063	5.62546	5.02956	5.1554	5.64238	5.58314	6.64952	1.00855	1.17467	0.391572	1.00808	0.009369	0.765665	0.693801	0.748793	-1.21478	-0.26448	-0.524286	0.039172	0.771433	-0.281717	0.20418	0.519547	1.01949	1.04889	0.077632	-1.03051	1.41896	0.784027	1.54378	1.00972
13528445	AT5G19880	4.21217	4.30795	4.63225	4.69543	5.12282	4.81566	5.34668	5.29914	5.59755	5.04837	5.88612	6.32189	5.21849	5.57011	5.28365	5.20996	6.36127	6.71286	6.6369	6.61022	6.30743	5.84628	7.17933	7.57411	1.00631	1.26215	0.651399	0.514528	1.23845	1.8972	1.13451	0.991185	0.965305	0.35293	0.763302	1.50623	1.41841	1.04011	1.02378	0.636315	0.818059	0.861256	0.283905	0.048929	0.058475	0.283385	0.054757	-0.64497
13530150	AT5G24110	7.27881	5.45745	4.6631	5.71095	5.23236	5.08386	7.98051	5.92601	5.65865	5.93134	5.55293	6.06844	7.80529	6.10807	5.34126	7.27294	6.6161	6.26784	8.54981	7.24064	6.19899	7.03881	7.31269	6.8894	0.526477	0.650616	0.678161	1.56199	1.38373	1.18398	0.701696	0.468561	0.995551	0.220385	0.320568	0.984577	0.744517	1.13257	0.857733	-0.234135	0.696588	0.621562	0.042821	0.664004	-0.137818	-0.45452	0.37602	-0.363015
13378412	AT1G51890	7.84586	6.8351	5.87589	7.02628	6.30036	5.58265	8.07503	7.96012	7.88603	7.1749	7.58325	7.7411	8.55055	7.63783	7.60305	7.4975	7.4358	7.37065	9.11403	8.64039	8.11536	8.10384	7.74651	8.20568	0.704685	0.80273	1.72716	0.47122	1.13544	1.788	0.229169	1.12502	2.01014	0.148614	1.28289	2.15844	0.563476	1.00256	0.512316	0.60634	0.310705	0.835031	0.334307	-0.122459	-1.49783	0.457726	-0.972189	-1.32341
[truncated: 26 more columns]

## Sheet: 4h
Affymetrix ST 1.0 Probe	New locus	2h Col-0 Mock	4h Col-0 Mock	8h Col-0 Mock	16h Col-0 Mock	24h Col-0 Mock	48h Col-0 Mock	2h Col-0 Pst	4h Col-0 Pst	8h Col-0 Pst	16h Col-0 Pst	24h Col-0 Pst	48h Col-0 Pst	2h C24 Mock	4h C24 Mock	8h C24 Mock	16h C24 Mock	24h C24 Mock	48h C24 Mock	2h C24 Pst	4h C24 Pst	8h C24 Pst	16h C24 Pst	24h C24 Pst	48h C24 Pst	2h C24 Mock - Col-0 Mock	4h C24 Mock - Col-0 Mock	8h C24 Mock - Col-0 Mock	16h C24 Mock - Col-0 Mock	24h C24 Mock - Col-0 Mock	48h C24 Mock - Col-0 Mock	2h Col-0 Pst - Mock	4h Col-0 Pst - Mock	8h Col-0 Pst - Mock	16h Col-0 Pst - Mock	24h Col-0 Pst - Mock	48h Col-0 Pst - Mock	2h C24 Pst - Mock	4h C24 Pst - Mock	8h C24 Pst - Mock	16h C24 Pst - Mock	24h C24 Pst - Mock	48h C24 Pst - Mock	2h C24 Pst - Col-0 Pst (each Mock subtracted)	4h C24 Pst - Col-0 Pst (each Mock subtracted)	8h C24 Pst - Col-0 Pst (each Mock subtracted)	16h C24 Pst - Col-0 Pst (each Mock subtracted)	24h C24 Pst - Col-0 Pst (each Mock subtracted)	48h C24 Pst - Col-0 Pst (each Mock subtracted)
13336445	AT1G06160	7.9381	7.56186	6.82502	6.77582	6.69087	5.68054	7.95798	8.32661	7.92234	7.23011	6.742	5.0045	7.11352	6.42426	5.96445	5.61087	6.02674	4.86297	7.91029	7.71681	7.28886	7.3005	6.17658	5.29353	-0.824579	-1.13761	-0.860572	-1.16495	-0.664126	-0.817568	0.019884	0.764743	1.09733	0.45429	0.051129	-0.676033	0.796773	1.29256	1.32441	1.68963	0.149833	0.430561	0.776889	0.527815	0.227084	1.23534	0.098704	1.10659
13341812	AT1G18570	9.21055	7.83033	7.96678	8.03885	7.59896	6.6591	9.28127	8.67503	8.43296	8.5729	7.56101	7.13424	9.56829	8.67122	8.69889	8.29264	8.00985	7.52461	10.0622	9.49205	8.91224	9.02594	7.79658	7.61758	0.357735	0.840894	0.732117	0.253792	0.410892	0.865508	0.070719	0.844704	0.466181	0.534051	-0.037952	0.475137	0.493953	0.820822	0.213351	0.733305	-0.213275	0.092967	0.423234	-0.023882	-0.25283	0.199254	-0.175323	-0.38217
13353943	AT1G61120	5.41707	5.86437	6.28148	5.98384	6.35535	5.03275	5.67034	6.77993	6.73407	7.51219	9.21101	10.2522	5.15164	4.57048	5.09219	5.06371	5.05937	6.16462	6.21472	5.73319	5.95349	7.62737	7.02013	7.4141	-0.26543	-1.29389	-1.18929	-0.920135	-1.29598	1.13188	0.253272	0.915556	0.452589	1.52835	2.85567	5.21948	1.06308	1.16271	0.861304	2.56366	1.96076	1.24948	0.80981	0.247156	0.408715	1.03532	-0.894912	-3.97
13354180	AT1G61800	6.99134	6.27948	5.56	5.18392	6.18375	6.45961	7.6425	7.61838	6.89834	6.03339	7.85495	9.21194	9.08917	8.13059	7.14378	7.78859	7.37824	8.5311	9.87295	9.22416	7.99319	8.41109	8.68196	9.80399	2.09783	1.85111	1.58378	2.60467	1.1945	2.07149	0.651164	1.3389	1.33835	0.849474	1.6712	2.75233	0.783785	1.09357	0.849415	0.622505	1.30371	1.27289	0.132621	-0.245333	-0.488934	-0.226969	-0.367492	-1.47944
13362548	AT1G02920	9.40184	8.55826	7.9531	7.62675	8.07804	7.35044	9.8864	9.77757	9.77471	8.60425	8.86185	9.55799	9.3103	9.17807	8.44739	8.32763	8.08618	8.45186	10.2754	10.0316	9.26085	9.07655	8.73208	9.05304	-0.091535	0.619819	0.494285	0.700873	0.008134	1.10142	0.484566	1.21932	1.8216	0.977494	0.7838	2.20755	0.965127	0.853555	0.813461	0.74892	0.645904	0.601182	0.480561	-0.365763	-1.00814	-0.228574	-0.137896	-1.60637
13364981	AT1G08050	6.38883	5.53861	5.90833	5.83501	5.78723	6.26493	6.76858	6.2708	6.12759	6.05009	6.45315	7.6605	7.48672	6.75828	6.85511	7.50945	7.00357	7.4967	8.04205	7.41441	6.96818	7.58241	7.65749	7.82442	1.09789	1.21967	0.94678	1.67444	1.21633	1.23177	0.379745	0.732184	0.219263	0.215084	0.66592	1.39557	0.555329	0.656128	0.113072	0.072957	0.653925	0.327726	0.175584	-0.076056	-0.106191	-0.142127	-0.011995	-1.06784
13368466	AT1G15520	7.00984	6.21121	5.99746	6.20161	5.98167	6.07115	8.18219	7.55926	6.94442	6.52004	8.817	10.3656	9.78294	8.60355	7.63012	9.20808	8.37528	9.57958	10.6889	9.79143	8.8253	9.85919	9.84395	11.0452	2.7731	2.39234	1.63266	3.00647	2.39362	3.50843	1.17234	1.34805	0.946962	0.318433	2.83533	4.29444	0.905916	1.18788	1.19519	0.651111	1.46867	1.4656	-0.266429	-0.160166	0.248225	0.332678	-1.36666	-2.82884
13372625	AT1G26380	3.33168	3.12022	2.30432	2.81329	2.93597	2.67319	4.51624	3.90547	3.70285	2.90512	3.01997	2.89863	5.31626	4.34193	3.33596	3.57267	3.50881	3.41119	6.75164	5.8831	4.51889	4.4693	3.80422	3.67444	1.98458	1.22171	1.03163	0.759375	0.572838	0.737998	1.18456	0.785249	1.39853	0.091827	0.084003	0.225437	1.43538	1.54117	1.18293	0.896633	0.295406	0.26325	0.250828	0.755925	-0.215598	0.804806	0.211403	0.037813
13374839	AT1G32350	5.19628	5.37453	4.90649	4.78418	5.10256	4.32338	6.17926	6.11326	6.43433	5.54084	6.2023	8.21188	7.84284	7.38048	6.6146	6.6545	6.57704	7.53757	9.02018	8.40305	7.38239	7.79608	7.14635	9.38595	2.64657	2.00595	1.70811	1.87032	1.47449	3.21419	0.982986	0.738726	1.52784	0.756666	1.09975	3.8885	1.17734	1.02256	0.767797	1.14159	0.569312	1.84838	0.194354	0.283839	-0.76004	0.38492	-0.530434	-2.04012
13378412	AT1G51890	7.84586	6.8351	5.87589	7.02628	6.30036	5.58265	8.07503	7.96012	7.88603	7.1749	7.58325	7.7411	8.55055	7.63783	7.60305	7.4975	7.4358	7.37065	9.11403	8.64039	8.11536	8.10384	7.74651	8.20568	0.704685	0.80273	1.72716	0.47122	1.13544	1.788	0.229169	1.12502	2.01014	0.148614	1.28289	2.15844	0.563476	1.00256	0.512316	0.60634	0.310705	0.835031	0.334307	-0.122459	-1.49783	0.457726	-0.972189	-1.32341
13383656	AT1G65690	6.44412	5.82666	5.65905	5.60338	6.04523	6.2611	6.52581	6.64637	7.13779	6.30872	6.81929	7.84025	7.26425	7.38101	7.35241	6.92406	7.36785	7.80936	8.07739	8.04496	7.24096	7.46469	8.09703	8.82428	0.82013	1.55435	1.69336	1.32068	1.32262	1.54826	0.081689	0.819712	1.47874	0.705345	0.77406	1.57915	0.813141	0.663956	-0.111457	0.540634	0.729186	1.01492	0.731452	-0.155756	-1.5902	-0.164711	-0.044874	-0.564223
13393180	AT2G15480	4.95341	3.82502	3.16911	4.48588	4.64073	4.82071	5.29097	4.49994	4.55941	4.69864	4.46396	4.77672	6.23541	5.00507	5.39496	5.55681	5.69659	5.59339	7.34747	6.18294	5.6671	6.40625	5.51966	6.01519	1.282	1.18006	2.22585	1.07093	1.05586	0.772685	0.33756	0.674925	1.3903	0.212764	-0.176773	-0.043988	1.11206	1.17786	0.272134	0.849438	-0.17693	0.421796	0.774495	0.502939	-1.11816	0.636674	-0.000157	0.465784
13396126	AT2G22950	3.52021	2.96664	3.5264	3.45002	3.62677	3.76709	3.2917	3.78611	3.56711	3.36177	3.0928	3.37797	3.56906	3.40986	3.44694	3.20735	3.6359	3.42259	3.26318	4.36671	3.32034	3.57637	3.54211	2.97859	0.048854	0.443228	-0.079458	-0.242673	0.00913	-0.344497	-0.228507	0.819477	0.040709	-0.088252	-0.533966	-0.389121	-0.305885	0.956847	-0.126601	0.369023	-0.093794	-0.444007	-0.077378	0.13737	-0.16731	0.457275	0.440172	-0.054886
13396292	AT2G23270	5.07486	4.60933	5.01523	4.65687	5.12093	4.46703	5.63163	5.57069	5.27171	5.81309	4.93552	5.74657	7.3289	6.11765	5.33869	6.05197	5.54278	5.66794	8.20857	7.30459	5.51531	7.53445	5.5331	6.7948	2.25404	1.50832	0.323459	1.3951	0.42185	1.20091	0.556763	0.961356	0.256479	1.15622	-0.18541	1.27954	0.879666	1.18694	0.176621	1.48248	-0.009683	1.12685	0.322903	0.225586	-0.079858	0.326265	0.175727	-0.152682
13397254	AT2G26020	8.8274	7.31996	6.91518	6.37391	8.55456	6.30577	8.73878	8.6759	8.55204	7.96562	9.38522	7.8074	6.48104	5.07971	4.5015	4.98492	6.04615	5.86	8.10923	7.34063	6.72055	6.57144	7.41871	6.24118	-2.34635	-2.24025	-2.41368	-1.38899	-2.50841	-0.445766	-0.088616	1.35594	1.63686	1.59171	0.830661	1.50164	1.62819	2.26092	2.21904	1.58652	1.37255	0.381175	1.7168	0.904986	0.582181	-0.00519	0.541892	-1.12046
13400847	AT2G34940	6.53192	5.30979	5.39925	5.16675	5.58472	6.17511	6.20034	6.24214	6.76561	5.71428	7.04419	7.71224	7.59278	7.02049	8.16148	7.77666	8.02529	8.13037	7.76875	7.98726	8.12632	7.86633	8.42684	8.192	1.06086	1.7107	2.76223	2.60991	2.44057	1.95526	-0.331582	0.932353	1.36637	0.547527	1.45947	1.53713	0.175977	0.966773	-0.035156	0.089666	0.401548	0.061626	0.507559	0.03442	-1.40152	-0.457861	-1.05792	-1.4755
13401341	AT2G35980	6.32216	5.61547	4.92994	5.20055	5.0075	4.28503	7.3672	6.51398	7.04648	6.0586	6.16193	7.46484	8.96099	7.46699	6.86702	8.01273	7.17554	8.07783	9.75128	8.99821	7.85014	8.53488	7.94561	9.37543	2.63883	1.85152	1.93708	2.81217	2.16804	3.7928	1.04504	0.898507	2.11654	0.858044	1.15444	3.17981	0.790294	1.53122	0.983117	0.522152	0.77007	1.2976	-0.254748	0.632711	-1.13342	-0.335892	-0.384365	-1.88221
13406076	AT2G47190	4.73431	4.76985	5.23684	4.70855	5.64999	5.56085	5.65025	5.46458	5.63865	4.78522	6.26061	7.47677	6.10525	6.07192	6.54868	5.12218	6.10264	5.86919	6.71834	7.24462	7.02286	5.87687	5.96141	7.6444	1.37094	1.30207	1.31184	0.413633	0.452645	0.308345	0.91594	0.694732	0.401811	0.076666	0.610625	1.91593	0.613088	1.1727	0.474183	0.754686	-0.141225	1.7752	-0.302852	0.477965	0.072372	0.67802	-0.75185	-0.140723
13409771	AT2G17740	7.54319	7.19544	6.52714	7.30539	6.63155	4.60827	8.17656	8.13548	8.74856	7.61932	6.73978	5.56986	8.45434	7.42054	6.88581	7.5744	6.79572	5.79007	9.1853	8.77755	8.24641	8.15382	7.01908	6.38778	0.911147	0.225109	0.358669	0.269009	0.164166	1.1818	0.633367	0.940047	2.22142	0.313931	0.108222	0.961595	0.730961	1.35701	1.36059	0.579417	0.223359	0.597712	0.097594	0.416962	-0.860824	0.265486	0.115137	-0.363883
13410143	AT2G18660	7.9688	6.9001	6.86451	6.69768	7.21316	7.59663	8.35798	7.84993	9.20306	7.37025	8.73693	9.96101	9.47271	9.52229	10.1306	9.61952	9.68515	10.3896	9.89892	10.1719	9.90118	9.6536	10.0597	10.332	1.50391	2.6222	3.26608	2.92185	2.47199	2.79293	0.389177	0.949835	2.33855	0.672578	1.52377	2.36437	0.426204	0.649616	-0.229407	0.034074	0.374536	-0.0576	0.037027	-0.300219	-2.56795	-0.638504	-1.14924	-2.42198
13410252	AT2G19190	8.27072	8.13944	7.04605	6.60245	6.98848	5.91298	9.02036	9.10695	9.36923	7.477	7.4172	7.75181	9.54519	9.10973	8.10291	8.00669	7.57478	7.50691	10.0443	9.82523	9.24129	8.20104	7.74885	7.94627	1.27447	0.970295	1.05686	1.40424	0.586298	1.59393	0.749643	0.967511	2.32318	0.874549	0.428721	1.83883	0.499133	0.7155	1.13838	0.194353	0.174075	0.439356	-0.25051	-0.252011	-1.1848	-0.680196	-0.254646	-1.39948
13411796	AT2G22810	8.07239	7.88294	7.18787	7.80203	8.61974	7.82549	7.82987	7.13289	6.56605	7.45751	7.40656	5.44772	7.42687	8.05485	7.24058	6.76621	7.79023	5.81619	6.83737	6.58264	6.65807	5.68392	6.57484	4.7329	-0.645521	0.171909	0.052715	-1.03582	-0.82951	-2.00929	-0.242522	-0.750049	-0.621816	-0.344519	-1.21318	-2.37777	-0.589502	-1.4722	-0.582515	-1.08228	-1.21539	-1.08329	-0.34698	-0.722152	0.039301	-0.737766	-0.002212	1.29448
13413221	AT2G26400	6.77918	6.4938	5.81412	5.4698	5.51634	6.37425	5.7465	5.66454	6.62347	5.0351	9.03911	10.1022	7.13085	6.21751	7.48543	7.93861	8.05614	8.75152	7.24648	7.04981	7.73085	8.02242	9.2195	9.73811	0.351665	-0.276281	1.67131	2.46881	2.53981	2.37726	-1.03269	-0.829258	0.809347	-0.434692	3.52278	3.72795	0.115633	0.832292	0.245415	0.083811	1.16336	0.98659	1.14832	1.66155	-0.563932	0.518503	-2.35942	-2.74136
13418736	AT2G38860	8.6442	8.27746	7.93883	7.94567	8.16567	8.37021	9.09474	9.21593	9.06258	8.40957	8.84161	9.28323	9.36777	9.41676	9.3844	8.69365	8.82171	9.09359	10.3747	10.3266	9.8041	9.40678	9.37813	9.77221	0.723576	1.1393	1.44557	0.747979	0.656043	0.723381	0.450542	0.938473	1.12375	0.463898	0.675941	0.913019	1.0069	0.909851	0.419697	0.713133	0.55642	0.678619	0.556356	-0.028622	-0.704052	0.249235	-0.119521	-0.2344
13420430	AT2G42540	8.79314	9.43468	6.71237	6.07897	8.74557	10.3233	9.1063	7.69867	6.1709	6.92269	8.71666	10.1885	7.76199	9.18969	5.71387	6.14638	6.95618	8.02947	7.56021	6.64587	5.12807	6.05411	7.41799	8.80432	-1.03116	-0.244983	-0.998507	0.067407	-1.78939	-2.29379	0.313153	-1.73601	-0.541476	0.843716	-0.028914	-0.1348	-0.201774	-2.54382	-0.585798	-0.092266	0.461807	0.774854	-0.514927	-0.807816	-0.044322	-0.935982	0.490721	0.909654
13420874	AT2G43580	3.88069	3.9412	4.51722	3.52771	4.36079	6.33354	4.24675	5.03055	4.77306	3.9142	5.31544	6.94799	4.51008	5.20467	4.21342	5.06806	3.91715	5.17105	5.40531	6.63466	5.69793	4.42054	4.76778	5.20359	0.629391	1.26347	-0.3038	1.54035	-0.443638	-1.1625	0.366062	1.08936	0.255845	0.386489	0.954654	0.614443	0.895231	1.42999	1.48451	-0.647523	0.85063	0.032545	0.529169	0.34063	1.22866	-1.03401	-0.104024	-0.581898
13420890	AT2G43620	8.84492	9.27483	8.70636	8.23746	7.99178	8.10309	9.77046	10.037	10.4701	9.52794	8.3424	8.07936	7.5233	6.53133	5.35075	5.88784	6.28671	6.2546	8.32711	7.20362	6.57477	5.71631	5.13044	5.4025	-1.32163	-2.7435	-3.35561	-2.34962	-1.70507	-1.84848	0.925537	0.762196	1.76372	1.29048	0.350627	-0.023727	0.803816	0.672285	1.22402	-0.171525	-1.15627	-0.852107	-0.121721	-0.089911	-0.539699	-1.462	-1.5069	-0.82838
13426792	AT3G11340	7.81556	5.50995	5.23083	5.28057	5.65372	5.47363	8.12615	7.08598	7.53156	6.5268	9.43802	9.92194	8.64777	8.27882	7.39822	8.67672	8.27143	9.82554	9.94489	9.5543	8.41872	9.80668	10.3321	10.1306	0.832211	2.76886	2.16739	3.39615	2.6177	4.35191	0.310589	1.57603	2.30073	1.24623	3.7843	4.4483	1.29712	1.27549	1.02051	1.12996	2.06069	0.305079	0.986527	-0.300544	-1.28022	-0.116266	-1.72361	-4.14322
13428695	AT3G15500	6.10445	5.53094	5.03512	3.68171	4.9612	4.35	5.97366	6.36951	5.86254	4.68056	4.80176	6.57412	6.38732	6.15154	5.69817	4.80263	4.9344	4.9498	7.31455	7.22057	5.98113	6.1372	4.65573	6.03479	0.282876	0.620599	0.66306	1.12092	-0.026801	0.599803	-0.130788	0.838569	0.82743	0.998852	-0.159435	2.22412	0.927228	1.06903	0.282955	1.33457	-0.278665	1.08499	1.05802	0.23046	-0.544475	0.33572	-0.11923	-1.13913
13433736	AT3G26830	6.47828	6.55619	6.5713	6.21988	5.98194	5.64876	7.89883	8.12749	8.37772	7.40619	7.17373	8.59464	8.89339	8.40542	8.06219	8.46093	7.15857	8.59363	10.0118	9.49856	8.76593	9.40712	7.99582	9.17425	2.41511	1.84924	1.49089	2.24105	1.17663	2.94487	1.42055	1.5713	1.80641	1.1863	1.19179	2.94588	1.11841	1.09313	0.703743	0.946191	0.837249	0.580624	-0.302142	-0.478169	-1.10267	-0.240114	-0.354542	-2.36525
13434307	AT3G28510	4.68253	5.80317	4.50467	3.86556	5.49812	4.89597	4.18905	4.57306	6.30467	4.53595	7.95802	8.83647	8.03086	8.71809	9.10092	9.59532	9.73071	9.70272	8.444	9.3798	8.88426	9.72002	9.97142	10.1361	3.34833	2.91493	4.59625	5.72976	4.23259	4.80676	-0.493478	-1.23011	1.80001	0.670386	2.4599	3.9405	0.413139	0.661711	-0.216658	0.124701	0.240707	0.433417	0.906617	1.89182	-2.01666	-0.545685	-2.21919	-3.50709
13437483	AT3G49620	6.47827	5.80317	6.18425	6.28583	5.39691	4.56486	6.62877	6.58107	7.07265	6.92894	5.43082	5.97694	5.76693	4.7638	4.03122	4.49526	4.6807	3.926	6.55549	5.80557	4.86097	6.56052	4.51197	6.29215	-0.711336	-1.03936	-2.15303	-1.79057	-0.716212	-0.638857	0.150498	0.777907	0.888393	0.643111	0.033909	1.41208	0.788561	1.04177	0.829746	2.06526	-0.168734	2.36614	0.638063	0.263862	-0.058647	1.42215	-0.202643	0.954066
13443795	AT3G02800	9.22727	7.96977	8.53594	8.97669	7.60718	7.26807	9.19278	8.72542	8.79071	9.61195	7.81054	8.07357	9.86062	8.90922	9.35991	9.50521	8.55666	8.15362	10.2316	9.59043	9.25895	10.2754	8.615	8.54941	0.633344	0.939454	0.823967	0.528525	0.949485	0.885553	-0.034488	0.755654	0.254769	0.635262	0.203364	0.805508	0.370984	0.681207	-0.100957	0.770159	0.058334	0.39579	0.405472	-0.074447	-0.355726	0.134897	-0.14503	-0.409718
13447102	AT3G09940	6.77067	5.02782	4.83795	7.14615	6.3226	5.41986	6.94531	5.85736	6.57483	7.47167	8.85754	8.86838	8.45914	5.81864	6.11304	7.41714	7.12699	7.58116	8.49654	6.54732	6.82433	8.69319	8.02063	8.28973	1.68847	0.790819	1.27509	0.270991	0.804385	2.1613	0.17464	0.829533	1.73688	0.325524	2.53494	3.44852	0.0374	0.728672	0.71129	1.27606	0.893638	0.708571	-0.13724	-0.100861	-1.02559	0.950532	-1.6413	-2.73995
13452877	AT3G23550	10.6824	8.82756	8.25681	9.21878	9.07289	6.02928	10.6802	10.2485	9.95375	10.2929	9.15867	7.66326	10.369	7.62539	6.51823	8.18086	7.21515	6.54197	10.7632	9.186	7.85227	9.82968	7.24679	6.77136	-0.31346	-1.20216	-1.73858	-1.03792	-1.85774	0.512695	-0.00227	1.42092	1.69694	1.07412	0.085779	1.63398	0.39422	1.5606	1.33404	1.64883	0.031638	0.229385	0.39649	0.139678	-0.362895	0.574703	-0.054141	-1.4046
13453503	AT3G24900	4.59539	6.01242	4.39633	5.43075	5.4492	6.52043	4.27091	5.26696	5.56097	4.94785	6.90549	7.17608	4.77451	5.26153	4.17394	4.46271	3.33017	4.96913	4.63045	4.31595	5.01941	5.04328	4.57515	4.974	0.179121	-0.750897	-0.222388	-0.968042	-2.11903	-1.5513	-0.32448	-0.74546	1.16464	-0.482895	1.45629	0.655646	-0.144057	-0.945574	0.845463	0.580576	1.24499	0.004865	0.180423	-0.200114	-0.319172	1.06347	-0.2113	-0.650781
13457589	AT3G48850	4.13841	4.59682	3.98314	4.16325	4.46567	4.16916	5.41107	5.57958	5.43768	4.48201	5.66424	7.02393	7.18882	7.28423	6.12051	6.43409	6.2895	7.79258	8.60757	8.45038	7.53531	7.28637	7.28011	9.20052	3.05041	2.68741	2.13737	2.27084	1.82383	3.62342	1.27266	0.982763	1.45453	0.318764	1.19857	2.85476	1.41874	1.16615	1.4148	0.852281	0.990614	1.40794	0.146084	0.183391	-0.03974	0.533517	-0.207954	-1.44682
13461095	AT3G57240	7.96175	6.59025	5.87809	5.5911	4.62823	6.12254	7.583	7.53467	7.09944	6.63169	6.66197	8.67909	8.99847	7.93099	8.20997	7.60616	6.50513	8.11709	8.93702	8.7407	8.60245	7.95081	6.93108	8.1786	1.03672	1.34074	2.33188	2.01505	1.8769	1.99455	-0.378744	0.944418	1.22135	1.04059	2.03373	2.55655	-0.06145	0.809706	0.392483	0.344654	0.425948	0.061515	0.317294	-0.134712	-0.828871	-0.695931	-1.60778	-2.49504
13463691	AT3G63380	6.71443	6.08372	5.43495	5.39101	4.82125	4.24118	6.8631	7.25677	7.50667	6.38032	5.09524	6.04737	8.54137	7.89937	7.60725	7.42236	6.54171	6.60821	8.73454	8.69784	8.27939	7.63705	6.66362	7.2792	1.82695	1.81565	2.17229	2.03136	1.72046	2.36703	0.148672	1.17305	2.07172	0.989316	0.273993	1.80619	0.193164	0.798464	0.672144	0.214683	0.12191	0.670988	0.044492	-0.374589	-1.39958	-0.774633	-0.152083	-1.1352
13465664	AT4G04500	6.67901	5.76062	4.78247	4.24952	5.59486	6.70301	6.69238	6.60639	5.83548	5.83594	7.04546	8.68509	6.01552	4.20095	3.86172	4.7436	5.34006	5.99738	5.71992	5.25374	4.4052	4.79057	5.4101	6.64381	-0.663488	-1.55967	-0.920743	0.494088	-0.254805	-0.70563	0.013371	0.845767	1.05302	1.58642	1.4506	1.98207	-0.295597	1.05279	0.543475	0.046964	0.07005	0.646427	-0.308968	0.207023	-0.50954	-1.53946	-1.38055	-1.33564
13469960	AT4G17500	6.8936	6.85373	7.3087	6.09394	6.44186	5.29278	7.4669	7.54857	7.29926	7.26772	6.1862	6.57202	7.83584	7.06214	7.00635	6.55692	6.39639	6.90334	8.49007	8.07268	7.43629	8.19086	6.80582	7.73762	0.942238	0.208412	-0.302356	0.462985	-0.045475	1.61056	0.573297	0.694845	-0.009441	1.17378	-0.25566	1.27924	0.654226	1.01054	0.429946	1.63393	0.40943	0.834274	0.080929	0.315691	0.439387	0.460155	0.66509	-0.444964
13471365	AT4G20860	8.83676	7.78638	7.51062	7.3267	7.9431	7.23519	9.33926	8.49112	8.2567	7.73452	8.4002	8.44464	5.9841	6.37258	5.21621	5.79986	6.02335	5.52256	6.41961	5.68552	5.2972	5.71762	5.86006	6.41452	-2.85265	-1.4138	-2.29441	-1.52685	-1.91975	-1.71263	0.502501	0.704742	0.746079	0.407814	0.457102	1.20945	0.435512	-0.687055	0.080996	-0.082234	-0.163289	0.891959	-0.066989	-1.3918	-0.665083	-0.490048	-0.620391	-0.317489
13472344	AT4G23280	6.33535	6.27093	5.73959	6.28331	5.5341	4.3083	7.50001	7.37884	6.66386	6.07113	5.89234	4.56256	7.82055	7.30297	7.01996	7.12023	6.71982	5.75758	8.42306	7.99766	7.54267	7.10386	7.28432	6.49509	1.4852	1.03205	1.28037	0.836921	1.18572	1.44928	1.16465	1.10791	0.924271	-0.212176	0.358248	0.254265	0.602508	0.694687	0.522705	-0.016372	0.564499	0.737514	-0.562144	-0.413227	-0.401566	0.195804	0.206251	0.483249
13473374	AT4G25390	7.34414	6.28549	6.32671	6.28806	6.81859	6.34184	7.27512	7.14497	6.81002	6.7142	6.72396	7.13577	6.89232	5.96241	6.38785	6.46432	6.47569	6.25798	7.42042	6.70287	6.5941	6.8483	7.05463	6.94753	-0.451821	-0.323082	0.061135	0.17626	-0.3429	-0.083857	-0.069014	0.859479	0.483306	0.426134	-0.094631	0.793928	0.528104	0.740462	0.206258	0.383977	0.578939	0.689547	0.597118	-0.119017	-0.277048	-0.042157	0.67357	-0.104381
13475629	AT4G30650	7.92126	10.0754	9.21723	7.77384	7.04573	8.56819	7.7796	8.48408	8.26356	7.6527	7.45994	8.09213	7.34212	9.68731	9.05121	7.83295	6.34087	7.86246	7.65128	8.36925	8.67735	7.73982	6.44155	7.44111	-0.579141	-0.388056	-0.166019	0.059111	-0.704866	-0.705733	-0.141655	-1.59129	-0.953665	-0.121133	0.414207	-0.47606	0.309164	-1.31806	-0.373864	-0.093132	0.10068	-0.42135	0.450819	0.273227	0.579801	0.028001	-0.313527	0.05471
13480899	AT4G02380	9.85974	8.9089	8.6972	9.56367	7.54899	7.68776	9.77153	9.6049	9.71036	9.92909	7.78429	9.12689	10.0739	9.96097	10.2996	10.8427	8.82663	9.29334	10.7274	10.7451	10.4908	11.3369	8.98085	9.57798	0.2142	1.05207	1.60238	1.27903	1.27764	1.60559	-0.088213	0.696003	1.01316	0.365416	0.235302	1.43913	0.65343	0.7841	0.19126	0.49421	0.154226	0.284641	0.741643	0.088097	-0.821904	0.128794	-0.081076	-1.15449
13482338	AT4G08770	7.70244	6.76724	5.98571	7.99265	6.73325	5.89083	8.36294	8.33795	8.32323	7.91774	7.82754	9.04329	8.84476	6.69473	6.16981	7.41505	6.63596	7.76799	9.07745	7.77798	7.04258	8.35132	7.75222	10.1142	1.14233	-0.072513	0.184092	-0.577595	-0.097292	1.87716	0.6605	1.57071	2.33752	-0.07491	1.09429	3.15246	0.232688	1.08326	0.872773	0.936269	1.11626	2.34625	-0.427812	-0.487459	-1.46475	1.01118	0.021973	-0.806212
13485325	AT4G16260	6.41513	6.84597	6.87445	5.82418	6.07986	4.79319	6.55206	8.30397	8.66307	6.14509	6.6588	7.84108	6.46034	7.88326	7.19388	5.40639	6.45919	6.35481	7.34585	8.5659	7.97104	5.75036	6.23684	8.20799	0.045208	1.03729	0.319434	-0.41779	0.379327	1.56163	0.136932	1.45801	1.78862	0.320906	0.578934	3.04789	0.885512	0.682648	0.777159	0.343961	-0.222352	1.85318	0.74858	-0.775359	-1.01146	0.023055	-0.801286	-1.19471
13486513	AT4G18430	4.16035	3.0689	3.437	3.61529	3.76826	3.19451	4.08875	4.32993	4.35567	4.21844	4.03545	3.92017	5.41151	4.57256	4.64866	5.10437	4.28537	4.70294	6.35439	6.03783	5.52796	5.41852	4.92969	5.55545	1.25116	1.50366	1.21166	1.48909	0.517105	1.50843	-0.071599	1.26103	0.918669	0.603153	0.267186	0.725664	0.942879	1.46527	0.879304	0.314147	0.644319	0.852516	1.01448	0.204239	-0.039365	-0.289006	0.377133	0.126852
13486861	AT4G19370	6.00664	5.53481	5.37004	5.798	6.11398	5.08896	6.37714	6.55608	6.47435	6.03645	5.82666	5.51529	7.38918	6.98609	7.13288	6.54486	7.58701	7.7563	8.08793	8.06999	7.74134	6.9288	7.92192	7.85466	1.38255	1.45128	1.76285	0.746861	1.47303	2.66735	0.370504	1.02127	1.10431	0.23845	-0.287317	0.426328	0.698748	1.0839	0.608458	0.383933	0.334906	0.098352	0.328244	0.062637	-0.495853	0.145483	0.622223	-0.327976
13493743	AT4G35180	6.91536	4.07415	4.33386	5.15595	3.99815	4.301	6.30488	4.81059	6.50795	6.48722	7.43116	7.72221	8.23467	7.37652	7.59681	7.6929	7.19232	7.76199	8.36081	8.6542	8.00315	8.95312	8.62873	8.3464	1.31931	3.30237	3.26295	2.53695	3.19417	3.46099	-0.610478	0.736438	2.1741	1.33127	3.433	3.42121	0.126139	1.27768	0.406344	1.26022	1.43641	0.584403	0.736617	0.54124	-1.76775	-0.07105	-1.99659	-2.83681
13498909	AT5G07690	7.3909	8.202	7.9055	7.64439	10.0498	10.3006	7.68673	7.58583	7.75115	7.85964	10.5397	10.1253	6.33526	7.31721	6.83193	7.21646	9.43318	9.58868	6.31018	6.59289	6.95552	7.90453	9.45696	9.3695	-1.05564	-0.884798	-1.07358	-0.427931	-0.616619	-0.711896	0.295831	-0.616171	-0.15435	0.215242	0.48995	-0.17524	-0.025077	-0.724311	0.1236	0.688065	0.023778	-0.21918	-0.320908	-0.10814	0.27795	0.472823	-0.466172	-0.04394
13500977	AT5G13330	7.26197	7.25345	7.37362	6.91356	6.50772	6.75251	7.85718	8.14197	8.27054	7.34412	7.71259	9.31637	8.262	8.20279	8.41665	8.36952	7.47904	7.64757	9.00921	9.31822	9.22689	8.94889	8.454	9.63436	1.00003	0.949334	1.04303	1.45596	0.971328	0.89506	0.595212	0.888519	0.896925	0.430555	1.20487	2.56386	0.747208	1.11543	0.810243	0.579364	0.974954	1.98679	0.151996	0.226912	-0.086682	0.148809	-0.229921	-0.577068
13508989	AT5G40990	5.0277	6.54723	6.25888	6.10009	5.87367	6.29116	6.08795	7.34499	8.00413	5.87057	6.37119	7.11949	5.23282	6.87255	7.49507	5.52237	5.76329	6.04322	6.32625	8.3277	8.3459	5.44905	6.81995	6.94077	0.205118	0.325325	1.23619	-0.577716	-0.110383	-0.247939	1.06025	0.797763	1.74525	-0.229522	0.497518	0.828327	1.09343	1.45514	0.850832	-0.073322	1.05666	0.897547	0.033182	0.65738	-0.894422	0.1562	0.559142	0.06922
13518837	AT5G63660	3.17435	3.78377	3.18391	4.03567	3.05629	3.26564	3.25668	3.12838	3.2151	3.46464	3.30451	2.90986	3.73187	3.70734	3.96893	3.90748	3.34589	3.60334	3.46858	2.82241	3.25968	3.57874	3.9781	3.45616	0.557516	-0.076431	0.785021	-0.128182	0.289604	0.337703	0.082324	-0.655392	0.031196	-0.571029	0.248218	-0.355776	-0.263289	-0.884927	-0.709252	-0.328748	0.63221	-0.147185	-0.345613	-0.229535	-0.740448	0.242281	0.383992	0.208591
13520416	AT5G67080	5.06932	4.0946	4.28486	4.74918	3.58548	3.79012	5.07387	5.39565	4.40066	5.73022	5.61159	6.68099	5.93936	4.70336	4.25257	4.59549	4.21118	4.5928	6.21233	5.48182	5.15509	6.83894	5.3411	6.14304	0.870039	0.608762	-0.032294	-0.153693	0.625697	0.802677	0.004552	1.30105	0.115804	0.981033	2.0261	2.89087	0.272969	0.778458	0.902521	2.24345	1.12991	1.55025	0.268417	-0.522589	0.786717	1.26242	-0.89619	-1.34062
13528445	AT5G19880	4.21217	4.30795	4.63225	4.69543	5.12282	4.81566	5.34668	5.29914	5.59755	5.04837	5.88612	6.32189	5.21849	5.57011	5.28365	5.20996	6.36127	6.71286	6.6369	6.61022	6.30743	5.84628	7.17933	7.57411	1.00631	1.26215	0.651399	0.514528	1.23845	1.8972	1.13451	0.991185	0.965305	0.35293	0.763302	1.50623	1.41841	1.04011	1.02378	0.636315	0.818059	0.861256	0.283905	0.048929	0.058475	0.283385	0.054757	-0.64497
13533418	AT5G38900	7.22118	6.5856	6.33538	6.68135	7.05744	7.09313	7.61927	8.09099	8.48563	7.40069	8.37523	9.58399	9.15289	8.62766	8.60164	9.0501	8.70543	9.20824	9.84572	9.77709	9.18213	9.40748	9.34859	9.7803	1.93171	2.04206	2.26626	2.36875	1.64799	2.11511	0.398093	1.50539	2.15025	0.71934	1.31779	2.49086	0.692821	1.14943	0.580486	0.357378	0.643164	0.572056	0.294728	-0.355957	-1.56976	-0.361962	-0.674625	-1.91881
13533592	AT5G39580	6.55286	6.06778	5.60768	5.93785	4.736	4.99856	7.08402	7.0089	7.74944	6.4525	4.86947	5.05097	7.10376	5.81923	4.91607	5.6788	5.09456	4.25212	7.03367	6.64365	6.81548	5.9077	4.79045	4.62745	0.550894	-0.248552	-0.691603	-0.259056	0.358563	-0.746439	0.531159	0.941116	2.14176	0.514653	0.133476	0.052405	-0.070089	0.82442	1.89941	0.228904	-0.304112	0.375332	-0.601248	-0.116696	-0.24236	-0.285749	-0.437588	0.322927
13543860	AT5G65600	5.74487	5.11193	4.65254	4.90715	4.3644	4.02865	5.95822	5.90197	5.65569	5.24743	5.21323	4.57927	6.33773	5.46861	5.34642	5.44121	4.72191	4.7246	7.26492	6.55703	6.2325	5.86528	4.81364	5.46189	0.592864	0.356679	0.693872	0.534056	0.357507	0.695949	0.213353	0.790039	1.00315	0.340274	0.848821	0.550623	0.927189	1.08842	0.886088	0.424067	0.091725	0.737292	0.713836	0.298377	-0.117063	0.083793	-0.757096	0.186669
13432135	AT3G23250	6.67966	6.42179	5.75181	5.25256	5.66316	5.00471	7.32949	6.81468	7.38148	6.27916	6.18027	6.58613	6.59081	6.53309	5.86126	5.28529	5.63369	5.87271	7.9378	7.15133	6.66761	7.19221	6.11644	6.48611	-0.088849	0.111296	0.10945	0.032732	-0.029466	0.868	0.649829	0.392892	1.62967	1.02661	0.517112	1.58142	1.34699	0.618246	0.806344	1.90692	0.482744	0.613401	0.697162	0.225354	-0.823322	0.880313	-0.034368	-0.968022
[truncated: 26 more columns]

## Sheet: 8h
Affymetrix ST 1.0 Probe	New locus	2h Col-0 Mock	4h Col-0 Mock	8h Col-0 Mock	16h Col-0 Mock	24h Col-0 Mock	48h Col-0 Mock	2h Col-0 Pst	4h Col-0 Pst	8h Col-0 Pst	16h Col-0 Pst	24h Col-0 Pst	48h Col-0 Pst	2h C24 Mock	4h C24 Mock	8h C24 Mock	16h C24 Mock	24h C24 Mock	48h C24 Mock	2h C24 Pst	4h C24 Pst	8h C24 Pst	16h C24 Pst	24h C24 Pst	48h C24 Pst	2h C24 Mock - Col-0 Mock	4h C24 Mock - Col-0 Mock	8h C24 Mock - Col-0 Mock	16h C24 Mock - Col-0 Mock	24h C24 Mock - Col-0 Mock	48h C24 Mock - Col-0 Mock	2h Col-0 Pst - Mock	4h Col-0 Pst - Mock	8h Col-0 Pst - Mock	16h Col-0 Pst - Mock	24h Col-0 Pst - Mock	48h Col-0 Pst - Mock	2h C24 Pst - Mock	4h C24 Pst - Mock	8h C24 Pst - Mock	16h C24 Pst - Mock	24h C24 Pst - Mock	48h C24 Pst - Mock	2h C24 Pst - Col-0 Pst (each Mock subtracted)	4h C24 Pst - Col-0 Pst (each Mock subtracted)	8h C24 Pst - Col-0 Pst (each Mock subtracted)	16h C24 Pst - Col-0 Pst (each Mock subtracted)	24h C24 Pst - Col-0 Pst (each Mock subtracted)	48h C24 Pst - Col-0 Pst (each Mock subtracted)
13336445	AT1G06160	7.9381	7.56186	6.82502	6.77582	6.69087	5.68054	7.95798	8.32661	7.92234	7.23011	6.742	5.0045	7.11352	6.42426	5.96445	5.61087	6.02674	4.86297	7.91029	7.71681	7.28886	7.3005	6.17658	5.29353	-0.824579	-1.13761	-0.860572	-1.16495	-0.664126	-0.817568	0.019884	0.764743	1.09733	0.45429	0.051129	-0.676033	0.796773	1.29256	1.32441	1.68963	0.149833	0.430561	0.776889	0.527815	0.227084	1.23534	0.098704	1.10659
13339077	AT1G12010	7.23459	7.75873	7.94744	8.16277	7.63824	6.93842	7.48712	7.77873	7.06705	7.84293	6.93244	5.83033	4.284	3.87702	4.78593	3.9235	4.28411	3.9958	4.28905	4.05913	3.61783	4.4119	4.40916	3.38434	-2.9506	-3.88171	-3.16151	-4.23927	-3.35413	-2.94262	0.252529	0.020003	-0.880383	-0.319838	-0.705795	-1.10809	0.00505	0.182113	-1.1681	0.488407	0.125054	-0.611464	-0.247479	0.16211	-0.287715	0.808245	0.830849	0.496624
13343699	AT1G23120	5.12078	5.09094	4.60885	5.16556	4.9974	4.75539	5.3323	4.90194	5.9156	4.9196	5.39928	6.12696	5.25277	5.74786	5.54371	5.60519	5.88608	5.88627	5.41467	6.13226	6.32149	6.2735	6.2365	6.70287	0.132	0.656922	0.934859	0.439628	0.888684	1.13088	0.211524	-0.189003	1.30675	-0.245967	0.40188	1.37157	0.161898	0.384395	0.777783	0.668304	0.350419	0.816602	-0.049626	0.573398	-0.528971	0.914271	-0.051461	-0.554969
13351025	AT1G51800	8.96511	7.93544	6.82	7.25815	6.9489	6.37215	9.19067	8.55951	8.68342	7.95941	7.76425	7.96534	9.23885	8.26405	6.63626	7.17177	7.5697	7.18028	9.45297	8.72051	7.83781	7.91314	7.92694	7.65406	0.273732	0.328617	-0.183742	-0.086385	0.620808	0.80813	0.225557	0.624072	1.86342	0.701255	0.815356	1.59319	0.214127	0.456458	1.20155	0.741374	0.357235	0.473782	-0.01143	-0.167614	-0.661869	0.040119	-0.458121	-1.11941
13353090	AT1G57630	10.008	8.01412	6.93947	7.68401	7.72212	7.55249	10.0154	8.99476	7.94314	8.4989	9.60023	10.5666	4.56924	3.55995	4.63959	3.63177	4.20597	3.96805	4.29314	3.96498	3.97414	4.80025	4.02004	4.54383	-5.43875	-4.45417	-2.29988	-4.05224	-3.51614	-3.58444	0.00746	0.980643	1.00367	0.814892	1.87811	3.0141	-0.2761	0.405031	-0.665458	1.16848	-0.185932	0.575787	-0.28356	-0.575612	-1.66913	0.353589	-2.06405	-2.43831
13354180	AT1G61800	6.99134	6.27948	5.56	5.18392	6.18375	6.45961	7.6425	7.61838	6.89834	6.03339	7.85495	9.21194	9.08917	8.13059	7.14378	7.78859	7.37824	8.5311	9.87295	9.22416	7.99319	8.41109	8.68196	9.80399	2.09783	1.85111	1.58378	2.60467	1.1945	2.07149	0.651164	1.3389	1.33835	0.849474	1.6712	2.75233	0.783785	1.09357	0.849415	0.622505	1.30371	1.27289	0.132621	-0.245333	-0.488934	-0.226969	-0.367492	-1.47944
13358498	AT1G72920	8.46982	8.84438	9.8931	8.67748	8.79585	8.33933	8.92996	8.40408	8.90974	9.74164	8.92764	9.63703	9.24817	9.45703	10.1273	9.15611	9.29026	9.76018	9.72353	9.59823	9.45326	10.3757	9.99154	10.1808	0.778347	0.612647	0.234175	0.478635	0.494405	1.42085	0.460141	-0.440299	-0.983357	1.06416	0.131784	1.29769	0.475363	0.141201	-0.67401	1.21957	0.701283	0.420668	0.015222	0.5815	0.309347	0.155407	0.569499	-0.877026
13362548	AT1G02920	9.40184	8.55826	7.9531	7.62675	8.07804	7.35044	9.8864	9.77757	9.77471	8.60425	8.86185	9.55799	9.3103	9.17807	8.44739	8.32763	8.08618	8.45186	10.2754	10.0316	9.26085	9.07655	8.73208	9.05304	-0.091535	0.619819	0.494285	0.700873	0.008134	1.10142	0.484566	1.21932	1.8216	0.977494	0.7838	2.20755	0.965127	0.853555	0.813461	0.74892	0.645904	0.601182	0.480561	-0.365763	-1.00814	-0.228574	-0.137896	-1.60637
13362553	AT1G02930	8.57135	8.10077	7.34187	7.50274	7.21957	7.66379	8.85826	8.48591	8.6319	7.93085	7.81785	8.89261	9.09152	8.72517	8.2541	8.40555	8.11446	8.51323	9.18877	9.12019	8.92261	8.85722	8.47779	8.76757	0.520174	0.624399	0.912233	0.902818	0.894896	0.849444	0.286914	0.385136	1.29003	0.428113	0.598282	1.22882	0.097253	0.395018	0.668508	0.451666	0.363328	0.254335	-0.189661	0.009882	-0.621523	0.023553	-0.234954	-0.974487
13368466	AT1G15520	7.00984	6.21121	5.99746	6.20161	5.98167	6.07115	8.18219	7.55926	6.94442	6.52004	8.817	10.3656	9.78294	8.60355	7.63012	9.20808	8.37528	9.57958	10.6889	9.79143	8.8253	9.85919	9.84395	11.0452	2.7731	2.39234	1.63266	3.00647	2.39362	3.50843	1.17234	1.34805	0.946962	0.318433	2.83533	4.29444	0.905916	1.18788	1.19519	0.651111	1.46867	1.4656	-0.266429	-0.160166	0.248225	0.332678	-1.36666	-2.82884
13369973	AT1G19250	4.66197	5.6159	4.85433	5.22194	5.17384	4.60368	5.44096	6.09611	6.90316	4.92452	8.35194	9.94892	7.9173	8.18992	7.50605	8.12506	7.64038	9.26207	8.9897	8.9934	8.62522	9.27121	9.79995	10.603	3.25532	2.57402	2.65172	2.90313	2.46654	4.65838	0.778983	0.480211	2.04883	-0.297423	3.1781	5.34523	1.0724	0.803485	1.11917	1.14614	2.15957	1.34096	0.29342	0.323274	-0.929664	1.44356	-1.01853	-4.00427
13372625	AT1G26380	3.33168	3.12022	2.30432	2.81329	2.93597	2.67319	4.51624	3.90547	3.70285	2.90512	3.01997	2.89863	5.31626	4.34193	3.33596	3.57267	3.50881	3.41119	6.75164	5.8831	4.51889	4.4693	3.80422	3.67444	1.98458	1.22171	1.03163	0.759375	0.572838	0.737998	1.18456	0.785249	1.39853	0.091827	0.084003	0.225437	1.43538	1.54117	1.18293	0.896633	0.295406	0.26325	0.250828	0.755925	-0.215598	0.804806	0.211403	0.037813
13372636	AT1G26420	5.26483	4.96255	3.99771	4.04412	4.46353	3.14533	6.19323	5.39531	6.06168	4.74067	4.41666	4.77022	6.11903	5.76015	5.2664	4.60482	4.4737	4.55778	7.57931	7.10424	6.22661	5.67516	5.63117	4.74948	0.854199	0.7976	1.26869	0.560694	0.010169	1.41245	0.928402	0.432767	2.06397	0.69655	-0.046874	1.62489	1.46028	1.3441	0.960214	1.07035	1.15747	0.191706	0.531876	0.911328	-1.10376	0.3738	1.20435	-1.43318
13374839	AT1G32350	5.19628	5.37453	4.90649	4.78418	5.10256	4.32338	6.17926	6.11326	6.43433	5.54084	6.2023	8.21188	7.84284	7.38048	6.6146	6.6545	6.57704	7.53757	9.02018	8.40305	7.38239	7.79608	7.14635	9.38595	2.64657	2.00595	1.70811	1.87032	1.47449	3.21419	0.982986	0.738726	1.52784	0.756666	1.09975	3.8885	1.17734	1.02256	0.767797	1.14159	0.569312	1.84838	0.194354	0.283839	-0.76004	0.38492	-0.530434	-2.04012
13385870	AT1G70850	3.69884	3.91687	4.28235	3.69885	4.10576	4.1779	4.3052	4.43682	3.43449	3.53828	3.8027	4.08082	3.88431	4.0606	4.64612	3.74704	3.75766	3.92868	3.52998	3.89206	3.26205	3.97287	4.26558	3.76999	0.185473	0.143737	0.363774	0.048197	-0.348099	-0.249224	0.606361	0.519951	-0.847858	-0.160562	-0.303057	-0.09708	-0.354329	-0.168547	-1.38407	0.22583	0.507918	-0.158687	-0.96069	-0.688498	-0.536211	0.386392	0.810975	-0.061607
13388200	AT1G76650	5.39795	4.59336	5.40275	4.20594	3.64853	3.74381	5.32596	4.14578	4.59974	5.5047	4.07006	4.4997	4.59372	4.41253	5.02019	4.39595	4.12998	3.8238	4.92717	4.90241	4.22363	5.49808	3.52557	4.82556	-0.804228	-0.180825	-0.382562	0.190008	0.481454	0.079999	-0.071987	-0.447574	-0.803009	1.29877	0.421537	0.7559	0.333447	0.489875	-0.79656	1.10213	-0.604412	1.00176	0.405434	0.937449	0.006449	-0.196634	-1.02595	0.245856
13390755	AT2G02120	3.02915	3.38623	3.36424	3.92587	3.67323	3.85161	3.69344	3.82717	4.10402	3.68598	3.60864	3.54548	3.67952	3.94128	3.23204	4.64105	3.77917	3.23377	4.10302	4.0866	4.29856	3.71976	3.61447	3.5824	0.650373	0.555048	-0.132199	0.715181	0.105943	-0.617841	0.664291	0.440933	0.739779	-0.239894	-0.064587	-0.30613	0.423502	0.145319	1.06652	-0.921292	-0.1647	0.348633	-0.240789	-0.295614	0.32674	-0.681398	-0.100113	0.654763
13392784	AT2G13810	4.96739	4.12887	4.0739	3.72885	3.81932	4.08502	4.81897	4.37141	6.19606	3.62824	7.01314	9.40425	6.72045	7.62293	6.33659	6.8485	7.28668	9.52737	8.26456	8.50676	7.5627	8.02012	9.40242	10.7758	1.75306	3.49406	2.26269	3.11965	3.46736	5.44235	-0.148422	0.242546	2.12217	-0.100611	3.19382	5.31923	1.54411	0.883832	1.22611	1.17162	2.11574	1.24845	1.69253	0.641286	-0.896058	1.27223	-1.07808	-4.07077
13397254	AT2G26020	8.8274	7.31996	6.91518	6.37391	8.55456	6.30577	8.73878	8.6759	8.55204	7.96562	9.38522	7.8074	6.48104	5.07971	4.5015	4.98492	6.04615	5.86	8.10923	7.34063	6.72055	6.57144	7.41871	6.24118	-2.34635	-2.24025	-2.41368	-1.38899	-2.50841	-0.445766	-0.088616	1.35594	1.63686	1.59171	0.830661	1.50164	1.62819	2.26092	2.21904	1.58652	1.37255	0.381175	1.7168	0.904986	0.582181	-0.00519	0.541892	-1.12046
13401341	AT2G35980	6.32216	5.61547	4.92994	5.20055	5.0075	4.28503	7.3672	6.51398	7.04648	6.0586	6.16193	7.46484	8.96099	7.46699	6.86702	8.01273	7.17554	8.07783	9.75128	8.99821	7.85014	8.53488	7.94561	9.37543	2.63883	1.85152	1.93708	2.81217	2.16804	3.7928	1.04504	0.898507	2.11654	0.858044	1.15444	3.17981	0.790294	1.53122	0.983117	0.522152	0.77007	1.2976	-0.254748	0.632711	-1.13342	-0.335892	-0.384365	-1.88221
13401734	AT2G36970	8.22457	7.18207	7.17707	8.77125	7.13794	6.1567	8.12281	7.63466	7.9746	8.78925	6.81021	6.4059	7.52298	6.74977	6.31719	7.88514	6.6036	6.89857	7.58776	6.95746	7.14848	8.0073	6.74826	7.03222	-0.701593	-0.432309	-0.859879	-0.886106	-0.53434	0.741877	-0.101764	0.452589	0.79753	0.017995	-0.327729	0.249201	0.064779	0.207693	0.831293	0.122155	0.144659	0.133644	0.166543	-0.244896	0.033763	0.10416	0.472388	-0.115557
13402585	AT2G38900	4.63908	4.43247	4.52775	4.21567	3.74851	4.39973	3.97912	5.68599	3.31504	4.11998	4.33964	4.80276	3.8719	3.90112	4.21774	4.37673	3.37324	4.78439	4.44951	3.51323	3.50884	3.46147	4.65189	3.52397	-0.767183	-0.531351	-0.310005	0.161059	-0.375265	0.384659	-0.659964	1.25353	-1.21271	-0.095685	0.591135	0.403026	0.577614	-0.387888	-0.708906	-0.915253	1.27865	-1.26042	1.23758	-1.64141	0.503804	-0.819568	0.687511	-1.66344
13404090	AT2G42360	6.54948	6.68885	6.24317	6.33136	6.32091	5.8819	6.60232	6.97428	7.20475	6.46185	6.51675	6.5856	6.91681	7.26145	6.69811	6.80795	6.97478	6.75592	7.24779	7.48339	7.69494	7.21392	7.02551	7.31195	0.367325	0.572601	0.454938	0.476596	0.653868	0.874014	0.052842	0.285425	0.96158	0.130495	0.195836	0.703692	0.330988	0.221941	0.996827	0.405963	0.050737	0.556035	0.278146	-0.063484	0.035247	0.275468	-0.145099	-0.147657
13409077	AT2G15760	5.18236	4.77581	5.02491	5.63821	4.79443	5.33204	5.64466	5.58842	6.16445	6.01152	5.89694	6.1811	5.96708	5.88412	6.03396	5.73843	5.31935	5.23532	6.61956	6.50969	6.8611	6.76798	5.87308	6.08048	0.784719	1.10831	1.00905	0.100224	0.52492	-0.096716	0.462294	0.812601	1.13955	0.373309	1.10252	0.849068	0.652478	0.625569	0.82714	1.02955	0.553737	0.845155	0.190184	-0.187032	-0.312405	0.656237	-0.548779	-0.003913
13409771	AT2G17740	7.54319	7.19544	6.52714	7.30539	6.63155	4.60827	8.17656	8.13548	8.74856	7.61932	6.73978	5.56986	8.45434	7.42054	6.88581	7.5744	6.79572	5.79007	9.1853	8.77755	8.24641	8.15382	7.01908	6.38778	0.911147	0.225109	0.358669	0.269009	0.164166	1.1818	0.633367	0.940047	2.22142	0.313931	0.108222	0.961595	0.730961	1.35701	1.36059	0.579417	0.223359	0.597712	0.097594	0.416962	-0.860824	0.265486	0.115137	-0.363883
13410252	AT2G19190	8.27072	8.13944	7.04605	6.60245	6.98848	5.91298	9.02036	9.10695	9.36923	7.477	7.4172	7.75181	9.54519	9.10973	8.10291	8.00669	7.57478	7.50691	10.0443	9.82523	9.24129	8.20104	7.74885	7.94627	1.27447	0.970295	1.05686	1.40424	0.586298	1.59393	0.749643	0.967511	2.32318	0.874549	0.428721	1.83883	0.499133	0.7155	1.13838	0.194353	0.174075	0.439356	-0.25051	-0.252011	-1.1848	-0.680196	-0.254646	-1.39948
13412564	AT2G24850	5.95355	5.58815	5.79136	6.27228	6.74879	6.94033	6.04627	5.9272	6.61818	8.38726	10.6113	11.0916	6.35613	5.7165	5.75076	7.8876	7.63336	9.62445	7.42993	6.09539	6.76727	9.57718	10.5119	10.5106	0.402585	0.128344	-0.040599	1.61532	0.884565	2.68412	0.092722	0.339047	0.826825	2.11498	3.86254	4.15127	1.0738	0.378894	1.01651	1.68958	2.87855	0.88615	0.981079	0.039847	0.189688	-0.425401	-0.983985	-3.26512
13415110	AT2G30750	2.38199	2.51986	2.18807	2.32846	2.24176	2.13449	2.98616	2.81075	4.27025	3.26757	3.07584	3.48624	3.55818	2.98669	2.57949	2.51964	2.37095	2.11087	4.73882	4.37907	3.70771	4.57683	3.12837	2.92215	1.17619	0.466825	0.391424	0.19118	0.129196	-0.023615	0.604161	0.290889	2.08218	0.93911	0.834078	1.35175	1.18064	1.39239	1.12822	2.05719	0.757417	0.81128	0.576476	1.1015	-0.953961	1.11808	-0.076661	-0.540469
13420626	AT2G43000	5.43524	5.86165	5.27573	5.2698	6.44936	6.35359	6.29109	6.6508	6.87295	6.19047	7.47876	8.24035	7.5005	7.78493	7.16826	7.39903	8.04378	8.57723	8.21086	8.13773	7.91384	7.47649	8.70684	9.1229	2.06526	1.92328	1.89253	2.12923	1.59442	2.22364	0.855847	0.789152	1.59722	0.920664	1.0294	1.88676	0.71036	0.352794	0.745582	0.077461	0.663059	0.545673	-0.145487	-0.436358	-0.85164	-0.843203	-0.366336	-1.34109
13420890	AT2G43620	8.84492	9.27483	8.70636	8.23746	7.99178	8.10309	9.77046	10.037	10.4701	9.52794	8.3424	8.07936	7.5233	6.53133	5.35075	5.88784	6.28671	6.2546	8.32711	7.20362	6.57477	5.71631	5.13044	5.4025	-1.32163	-2.7435	-3.35561	-2.34962	-1.70507	-1.84848	0.925537	0.762196	1.76372	1.29048	0.350627	-0.023727	0.803816	0.672285	1.22402	-0.171525	-1.15627	-0.852107	-0.121721	-0.089911	-0.539699	-1.462	-1.5069	-0.82838
13426792	AT3G11340	7.81556	5.50995	5.23083	5.28057	5.65372	5.47363	8.12615	7.08598	7.53156	6.5268	9.43802	9.92194	8.64777	8.27882	7.39822	8.67672	8.27143	9.82554	9.94489	9.5543	8.41872	9.80668	10.3321	10.1306	0.832211	2.76886	2.16739	3.39615	2.6177	4.35191	0.310589	1.57603	2.30073	1.24623	3.7843	4.4483	1.29712	1.27549	1.02051	1.12996	2.06069	0.305079	0.986527	-0.300544	-1.28022	-0.116266	-1.72361	-4.14322
13432135	AT3G23250	6.67966	6.42179	5.75181	5.25256	5.66316	5.00471	7.32949	6.81468	7.38148	6.27916	6.18027	6.58613	6.59081	6.53309	5.86126	5.28529	5.63369	5.87271	7.9378	7.15133	6.66761	7.19221	6.11644	6.48611	-0.088849	0.111296	0.10945	0.032732	-0.029466	0.868	0.649829	0.392892	1.62967	1.02661	0.517112	1.58142	1.34699	0.618246	0.806344	1.90692	0.482744	0.613401	0.697162	0.225354	-0.823322	0.880313	-0.034368	-0.968022
13433243	AT3G25760	7.74462	7.30105	6.91	6.70758	8.19316	8.14892	8.10212	7.72416	7.85789	8.0672	9.03364	9.30235	8.51477	7.89603	7.15604	7.0463	7.89682	8.17435	9.03053	8.46707	8.19456	8.5139	8.95619	9.36868	0.770145	0.594985	0.246038	0.33872	-0.296341	0.025431	0.357499	0.423115	0.947888	1.35962	0.840472	1.15343	0.515756	0.571036	1.03851	1.46761	1.05936	1.19433	0.158257	0.147921	0.090625	0.107986	0.218891	0.040901
13433736	AT3G26830	6.47828	6.55619	6.5713	6.21988	5.98194	5.64876	7.89883	8.12749	8.37772	7.40619	7.17373	8.59464	8.89339	8.40542	8.06219	8.46093	7.15857	8.59363	10.0118	9.49856	8.76593	9.40712	7.99582	9.17425	2.41511	1.84924	1.49089	2.24105	1.17663	2.94487	1.42055	1.5713	1.80641	1.1863	1.19179	2.94588	1.11841	1.09313	0.703743	0.946191	0.837249	0.580624	-0.302142	-0.478169	-1.10267	-0.240114	-0.354542	-2.36525
13435379	AT3G44300	5.92924	5.96454	4.03581	6.11891	6.14218	6.01636	5.9291	5.67986	6.33927	5.62985	6.8177	9.22009	5.12149	4.7001	4.7084	6.0529	7.25304	6.5872	5.85877	5.72508	5.44976	6.52924	5.86194	8.88231	-0.807747	-1.26444	0.672588	-0.066015	1.11086	0.570839	-0.000146	-0.284683	2.30346	-0.489062	0.675525	3.20373	0.737277	1.02498	0.741362	0.476345	-1.3911	2.2951	0.737423	1.30966	-1.5621	0.965407	-2.06663	-0.908627
13437483	AT3G49620	6.47827	5.80317	6.18425	6.28583	5.39691	4.56486	6.62877	6.58107	7.07265	6.92894	5.43082	5.97694	5.76693	4.7638	4.03122	4.49526	4.6807	3.926	6.55549	5.80557	4.86097	6.56052	4.51197	6.29215	-0.711336	-1.03936	-2.15303	-1.79057	-0.716212	-0.638857	0.150498	0.777907	0.888393	0.643111	0.033909	1.41208	0.788561	1.04177	0.829746	2.06526	-0.168734	2.36614	0.638063	0.263862	-0.058647	1.42215	-0.202643	0.954066
13439330	AT3G54420	7.44741	6.64973	5.44149	6.92805	6.2929	6.3813	8.02073	6.89737	7.08298	6.78264	6.54113	7.69607	8.36903	6.9791	6.91246	7.12518	7.07097	7.31317	8.72115	7.75187	7.80057	7.60641	7.69067	8.01592	0.921619	0.32937	1.47097	0.197139	0.778068	0.931877	0.573316	0.247637	1.64149	-0.145403	0.248231	1.31477	0.352123	0.772765	0.888107	0.481228	0.619709	0.702749	-0.221193	0.525128	-0.753387	0.626631	0.371478	-0.612024
13447102	AT3G09940	6.77067	5.02782	4.83795	7.14615	6.3226	5.41986	6.94531	5.85736	6.57483	7.47167	8.85754	8.86838	8.45914	5.81864	6.11304	7.41714	7.12699	7.58116	8.49654	6.54732	6.82433	8.69319	8.02063	8.28973	1.68847	0.790819	1.27509	0.270991	0.804385	2.1613	0.17464	0.829533	1.73688	0.325524	2.53494	3.44852	0.0374	0.728672	0.71129	1.27606	0.893638	0.708571	-0.13724	-0.100861	-1.02559	0.950532	-1.6413	-2.73995
13452877	AT3G23550	10.6824	8.82756	8.25681	9.21878	9.07289	6.02928	10.6802	10.2485	9.95375	10.2929	9.15867	7.66326	10.369	7.62539	6.51823	8.18086	7.21515	6.54197	10.7632	9.186	7.85227	9.82968	7.24679	6.77136	-0.31346	-1.20216	-1.73858	-1.03792	-1.85774	0.512695	-0.00227	1.42092	1.69694	1.07412	0.085779	1.63398	0.39422	1.5606	1.33404	1.64883	0.031638	0.229385	0.39649	0.139678	-0.362895	0.574703	-0.054141	-1.4046
13453503	AT3G24900	4.59539	6.01242	4.39633	5.43075	5.4492	6.52043	4.27091	5.26696	5.56097	4.94785	6.90549	7.17608	4.77451	5.26153	4.17394	4.46271	3.33017	4.96913	4.63045	4.31595	5.01941	5.04328	4.57515	4.974	0.179121	-0.750897	-0.222388	-0.968042	-2.11903	-1.5513	-0.32448	-0.74546	1.16464	-0.482895	1.45629	0.655646	-0.144057	-0.945574	0.845463	0.580576	1.24499	0.004865	0.180423	-0.200114	-0.319172	1.06347	-0.2113	-0.650781
13455957	AT3G44260	7.30807	7.37583	8.71091	7.53297	6.62369	6.02567	7.48155	7.24955	7.8162	8.35425	6.04557	6.06531	6.76793	7.08607	8.06985	6.71339	6.26064	5.72085	7.14585	7.71919	6.40538	7.58786	6.50116	6.17685	-0.540145	-0.289756	-0.641064	-0.819582	-0.363053	-0.304819	0.173475	-0.126277	-0.894713	0.821284	-0.578122	0.039641	0.37792	0.63312	-1.66447	0.874473	0.240526	0.456002	0.204445	0.759397	-0.769759	0.053189	0.818648	0.416361
13456701	AT3G46280	8.90122	8.72242	8.08486	8.12454	7.03219	5.36601	9.43481	9.32485	9.13469	7.86605	6.86378	6.3601	9.3463	9.09064	8.27643	7.83345	7.23647	6.50027	9.92135	9.76369	8.98815	8.15488	6.84478	7.05995	0.445079	0.368217	0.191569	-0.291089	0.20428	1.13426	0.533594	0.602424	1.04983	-0.258497	-0.168408	0.994084	0.575052	0.673046	0.711717	0.321427	-0.391691	0.559683	0.041458	0.070622	-0.338117	0.579924	-0.223283	-0.434401
13457589	AT3G48850	4.13841	4.59682	3.98314	4.16325	4.46567	4.16916	5.41107	5.57958	5.43768	4.48201	5.66424	7.02393	7.18882	7.28423	6.12051	6.43409	6.2895	7.79258	8.60757	8.45038	7.53531	7.28637	7.28011	9.20052	3.05041	2.68741	2.13737	2.27084	1.82383	3.62342	1.27266	0.982763	1.45453	0.318764	1.19857	2.85476	1.41874	1.16615	1.4148	0.852281	0.990614	1.40794	0.146084	0.183391	-0.03974	0.533517	-0.207954	-1.44682
13463691	AT3G63380	6.71443	6.08372	5.43495	5.39101	4.82125	4.24118	6.8631	7.25677	7.50667	6.38032	5.09524	6.04737	8.54137	7.89937	7.60725	7.42236	6.54171	6.60821	8.73454	8.69784	8.27939	7.63705	6.66362	7.2792	1.82695	1.81565	2.17229	2.03136	1.72046	2.36703	0.148672	1.17305	2.07172	0.989316	0.273993	1.80619	0.193164	0.798464	0.672144	0.214683	0.12191	0.670988	0.044492	-0.374589	-1.39958	-0.774633	-0.152083	-1.1352
13467352	AT4G11210	4.27373	4.36936	5.09799	5.54489	4.96711	4.79382	4.16243	4.27852	3.33516	3.97882	4.65946	4.58802	3.66937	3.24682	2.84971	3.12615	4.03836	3.41434	3.59567	3.53779	5.01865	3.59667	4.14371	3.66454	-0.604359	-1.12254	-2.24828	-2.41874	-0.928751	-1.37947	-0.111295	-0.090842	-1.76283	-1.56607	-0.307645	-0.205798	-0.073694	0.290968	2.16895	0.470523	0.105358	0.250199	0.037601	0.38181	3.93178	2.0366	0.413003	0.455997
13473038	AT4G24570	8.82469	7.98965	9.17533	9.12482	7.17314	6.50665	8.5921	7.88055	7.66933	9.82399	6.39143	6.74168	9.2026	8.0755	9.07119	8.47122	7.11582	7.24191	8.96697	8.25982	7.07627	9.58162	6.99756	7.43199	0.377907	0.085853	-0.104142	-0.653595	-0.057318	0.73526	-0.232595	-0.109105	-1.50601	0.699172	-0.781705	0.235029	-0.23563	0.184318	-1.99492	1.1104	-0.118256	0.190082	-0.003035	0.293423	-0.488914	0.411231	0.663449	-0.044947
13482338	AT4G08770	7.70244	6.76724	5.98571	7.99265	6.73325	5.89083	8.36294	8.33795	8.32323	7.91774	7.82754	9.04329	8.84476	6.69473	6.16981	7.41505	6.63596	7.76799	9.07745	7.77798	7.04258	8.35132	7.75222	10.1142	1.14233	-0.072513	0.184092	-0.577595	-0.097292	1.87716	0.6605	1.57071	2.33752	-0.07491	1.09429	3.15246	0.232688	1.08326	0.872773	0.936269	1.11626	2.34625	-0.427812	-0.487459	-1.46475	1.01118	0.021973	-0.806212
13485325	AT4G16260	6.41513	6.84597	6.87445	5.82418	6.07986	4.79319	6.55206	8.30397	8.66307	6.14509	6.6588	7.84108	6.46034	7.88326	7.19388	5.40639	6.45919	6.35481	7.34585	8.5659	7.97104	5.75036	6.23684	8.20799	0.045208	1.03729	0.319434	-0.41779	0.379327	1.56163	0.136932	1.45801	1.78862	0.320906	0.578934	3.04789	0.885512	0.682648	0.777159	0.343961	-0.222352	1.85318	0.74858	-0.775359	-1.01146	0.023055	-0.801286	-1.19471
13486513	AT4G18430	4.16035	3.0689	3.437	3.61529	3.76826	3.19451	4.08875	4.32993	4.35567	4.21844	4.03545	3.92017	5.41151	4.57256	4.64866	5.10437	4.28537	4.70294	6.35439	6.03783	5.52796	5.41852	4.92969	5.55545	1.25116	1.50366	1.21166	1.48909	0.517105	1.50843	-0.071599	1.26103	0.918669	0.603153	0.267186	0.725664	0.942879	1.46527	0.879304	0.314147	0.644319	0.852516	1.01448	0.204239	-0.039365	-0.289006	0.377133	0.126852
13498037	AT5G05600	7.54392	7.2825	7.06614	6.63117	7.15055	6.44498	7.65443	7.82704	7.97536	8.11093	8.95585	9.45152	6.77606	6.47912	6.07553	6.13922	6.4094	6.77456	7.62826	7.07256	7.20289	8.0602	8.29645	8.64754	-0.767859	-0.803379	-0.990607	-0.491954	-0.741152	0.329584	0.110507	0.544534	0.909218	1.47976	1.8053	3.00654	0.852194	0.593435	1.12736	1.92098	1.88705	1.87298	0.741687	0.048901	0.218141	0.441216	0.081748	-1.13356
13499814	AT5G10040	4.16895	5.17036	4.64324	4.67345	3.92262	5.39999	4.77262	4.61654	3.4712	3.77055	4.15573	3.99283	4.54305	4.14809	4.46674	4.33923	4.0076	4.68721	4.30263	3.87593	3.81772	3.85604	4.44514	4.23524	0.374091	-1.02226	-0.176498	-0.334219	0.084978	-0.712776	0.60367	-0.553821	-1.17204	-0.902903	0.233107	-1.40716	-0.240417	-0.272164	-0.649016	-0.483197	0.437539	-0.451978	-0.844087	0.281657	0.523023	0.419706	0.204432	0.955182
13500977	AT5G13330	7.26197	7.25345	7.37362	6.91356	6.50772	6.75251	7.85718	8.14197	8.27054	7.34412	7.71259	9.31637	8.262	8.20279	8.41665	8.36952	7.47904	7.64757	9.00921	9.31822	9.22689	8.94889	8.454	9.63436	1.00003	0.949334	1.04303	1.45596	0.971328	0.89506	0.595212	0.888519	0.896925	0.430555	1.20487	2.56386	0.747208	1.11543	0.810243	0.579364	0.974954	1.98679	0.151996	0.226912	-0.086682	0.148809	-0.229921	-0.577068
13508159	AT5G38710	5.64822	5.37277	4.63395	4.82939	6.03027	6.37684	5.75332	5.94684	6.89888	5.72084	7.36542	8.12981	7.3722	6.96704	6.93706	6.61505	6.75248	6.32597	7.84495	7.812	7.80598	7.34891	7.06889	7.78105	1.72399	1.59426	2.3031	1.78567	0.722203	-0.050868	0.105105	0.574064	2.26492	0.891457	1.33515	1.75297	0.47275	0.844968	0.868929	0.733853	0.316412	1.45508	0.367645	0.270904	-1.396	-0.157604	-1.01874	-0.297892
13508989	AT5G40990	5.0277	6.54723	6.25888	6.10009	5.87367	6.29116	6.08795	7.34499	8.00413	5.87057	6.37119	7.11949	5.23282	6.87255	7.49507	5.52237	5.76329	6.04322	6.32625	8.3277	8.3459	5.44905	6.81995	6.94077	0.205118	0.325325	1.23619	-0.577716	-0.110383	-0.247939	1.06025	0.797763	1.74525	-0.229522	0.497518	0.828327	1.09343	1.45514	0.850832	-0.073322	1.05666	0.897547	0.033182	0.65738	-0.894422	0.1562	0.559142	0.06922
13525472	AT5G13080	5.72037	6.4651	5.70109	6.16111	6.02755	4.70029	6.47929	6.64658	7.24851	6.42982	7.24183	8.88986	8.2687	7.91385	7.83796	7.84461	7.21141	7.82324	9.47663	9.18509	8.57076	8.73103	7.8852	9.49973	2.54833	1.44875	2.13687	1.6835	1.18386	3.12295	0.758919	0.181484	1.54742	0.268711	1.21428	4.18958	1.20793	1.27124	0.7328	0.886421	0.673788	1.67649	0.449012	1.08976	-0.814624	0.61771	-0.540492	-2.51309
13528445	AT5G19880	4.21217	4.30795	4.63225	4.69543	5.12282	4.81566	5.34668	5.29914	5.59755	5.04837	5.88612	6.32189	5.21849	5.57011	5.28365	5.20996	6.36127	6.71286	6.6369	6.61022	6.30743	5.84628	7.17933	7.57411	1.00631	1.26215	0.651399	0.514528	1.23845	1.8972	1.13451	0.991185	0.965305	0.35293	0.763302	1.50623	1.41841	1.04011	1.02378	0.636315	0.818059	0.861256	0.283905	0.048929	0.058475	0.283385	0.054757	-0.64497
13530150	AT5G24110	7.27881	5.45745	4.6631	5.71095	5.23236	5.08386	7.98051	5.92601	5.65865	5.93134	5.55293	6.06844	7.80529	6.10807	5.34126	7.27294	6.6161	6.26784	8.54981	7.24064	6.19899	7.03881	7.31269	6.8894	0.526477	0.650616	0.678161	1.56199	1.38373	1.18398	0.701696	0.468561	0.995551	0.220385	0.320568	0.984577	0.744517	1.13257	0.857733	-0.234135	0.696588	0.621562	0.042821	0.664004	-0.137818	-0.45452	0.37602	-0.363015
13533592	AT5G39580	6.55286	6.06778	5.60768	5.93785	4.736	4.99856	7.08402	7.0089	7.74944	6.4525	4.86947	5.05097	7.10376	5.81923	4.91607	5.6788	5.09456	4.25212	7.03367	6.64365	6.81548	5.9077	4.79045	4.62745	0.550894	-0.248552	-0.691603	-0.259056	0.358563	-0.746439	0.531159	0.941116	2.14176	0.514653	0.133476	0.052405	-0.070089	0.82442	1.89941	0.228904	-0.304112	0.375332	-0.601248	-0.116696	-0.24236	-0.285749	-0.437588	0.322927
13535388	AT5G44420	6.71151	6.61815	6.15911	5.39257	7.56139	6.50938	6.36081	7.0462	8.38505	7.63242	9.31871	8.82622	4.3609	4.56621	3.6128	2.87226	3.93596	4.63471	6.01535	6.21688	5.64102	4.49217	5.21302	4.71622	-2.35061	-2.05194	-2.54631	-2.52031	-3.62543	-1.87466	-0.350698	0.428057	2.22594	2.23985	1.75732	2.31684	1.65445	1.65067	2.02822	1.61991	1.27706	0.081512	2.00515	1.22261	-0.197716	-0.619944	-0.480258	-2.23533
13543253	AT5G64120	10.5029	10.2203	9.68164	9.70807	9.66104	9.26406	10.6863	10.6342	10.8819	9.97724	9.27976	9.27656	11.1258	10.5092	9.86109	9.70505	9.5129	9.18527	11.288	10.9928	10.8025	10.202	9.58493	9.56928	0.62294	0.28881	0.17945	-0.003015	-0.14814	-0.078791	0.18345	0.41389	1.20025	0.26917	-0.381284	0.012495	0.16213	0.48361	0.941433	0.496905	0.072029	0.384011	-0.02132	0.06972	-0.25882	0.227735	0.453313	0.371516
13543860	AT5G65600	5.74487	5.11193	4.65254	4.90715	4.3644	4.02865	5.95822	5.90197	5.65569	5.24743	5.21323	4.57927	6.33773	5.46861	5.34642	5.44121	4.72191	4.7246	7.26492	6.55703	6.2325	5.86528	4.81364	5.46189	0.592864	0.356679	0.693872	0.534056	0.357507	0.695949	0.213353	0.790039	1.00315	0.340274	0.848821	0.550623	0.927189	1.08842	0.886088	0.424067	0.091725	0.737292	0.713836	0.298377	-0.117063	0.083793	-0.757096	0.186669
[truncated: 26 more columns]

## Sheet: 16h
Affymetrix ST 1.0 Probe	New locus	2h Col-0 Mock	4h Col-0 Mock	8h Col-0 Mock	16h Col-0 Mock	24h Col-0 Mock	48h Col-0 Mock	2h Col-0 Pst	4h Col-0 Pst	8h Col-0 Pst	16h Col-0 Pst	24h Col-0 Pst	48h Col-0 Pst	2h C24 Mock	4h C24 Mock	8h C24 Mock	16h C24 Mock	24h C24 Mock	48h C24 Mock	2h C24 Pst	4h C24 Pst	8h C24 Pst	16h C24 Pst	24h C24 Pst	48h C24 Pst	2h C24 Mock - Col-0 Mock	4h C24 Mock - Col-0 Mock	8h C24 Mock - Col-0 Mock	16h C24 Mock - Col-0 Mock	24h C24 Mock - Col-0 Mock	48h C24 Mock - Col-0 Mock	2h Col-0 Pst - Mock	4h Col-0 Pst - Mock	8h Col-0 Pst - Mock	16h Col-0 Pst - Mock	24h Col-0 Pst - Mock	48h Col-0 Pst - Mock	2h C24 Pst - Mock	4h C24 Pst - Mock	8h C24 Pst - Mock	16h C24 Pst - Mock	24h C24 Pst - Mock	48h C24 Pst - Mock	2h C24 Pst - Col-0 Pst (each Mock subtracted)	4h C24 Pst - Col-0 Pst (each Mock subtracted)	8h C24 Pst - Col-0 Pst (each Mock subtracted)	16h C24 Pst - Col-0 Pst (each Mock subtracted)	24h C24 Pst - Col-0 Pst (each Mock subtracted)	48h C24 Pst - Col-0 Pst (each Mock subtracted)
13336657	AT1G06620	5.88209	5.0126	5.68784	5.27649	5.33293	5.60389	6.47507	5.47049	6.33018	6.64029	7.83372	8.61519	6.68103	6.12808	6.41689	6.06802	6.74413	7.28069	7.15327	6.65774	7.13875	7.24524	8.15635	8.72324	0.798941	1.11548	0.729056	0.79153	1.4112	1.6768	0.592989	0.457884	0.642344	1.36381	2.50079	3.01131	0.472249	0.529662	0.721859	1.17723	1.41223	1.44255	-0.12074	0.071778	0.079515	-0.186582	-1.08856	-1.56876
13342060	AT1G19020	6.81374	5.16415	5.31554	5.16299	4.75513	3.86387	6.99519	5.72095	5.97931	5.74396	5.4691	5.89513	7.69096	5.98765	5.68686	6.09365	5.9421	5.98217	8.33544	7.23117	6.39677	6.9044	6.30581	6.79108	0.877222	0.823505	0.371322	0.930664	1.18697	2.1183	0.181449	0.556802	0.663772	0.580977	0.713964	2.03126	0.644481	1.24352	0.709907	0.810744	0.363713	0.808907	0.463032	0.68672	0.046135	0.229767	-0.350251	-1.22235
13342166	AT1G19180	9.59001	9.22624	9.65319	8.89587	8.81675	8.21361	9.73565	9.86027	9.97983	10.0344	10.1861	10.9581	10.1022	9.60848	9.44247	9.09279	8.61584	9.23109	10.5319	10.1657	9.95161	10.3377	9.92053	10.5076	0.512236	0.382236	-0.210722	0.196922	-0.20091	1.01749	0.145637	0.634027	0.326642	1.13851	1.36931	2.74449	0.42969	0.557191	0.509138	1.24486	1.30469	1.27645	0.284053	-0.076836	0.182496	0.106348	-0.064616	-1.46804
13346118	AT1G30135	3.11443	2.82293	3.18435	3.11998	3.30126	2.70765	3.37394	3.28509	3.18312	4.09314	4.1991	5.18876	3.12802	3.40391	3.24107	3.29174	3.40734	3.34726	4.04106	3.52572	3.22517	4.16635	4.36564	4.84095	0.013597	0.580983	0.056725	0.171757	0.106077	0.639606	0.259519	0.46216	-0.001231	0.973159	0.897838	2.4811	0.913042	0.121807	-0.015908	0.874612	0.958299	1.49369	0.653523	-0.340353	-0.014677	-0.098547	0.060461	-0.987419
13348179	AT1G35710	11.0055	10.4171	10.3889	10.778	10.8415	11.0829	11.0529	10.2995	11.1359	11.4423	11.6264	11.8894	7.18523	7.00169	8.17137	8.73434	9.28433	9.82348	7.71626	7.62484	8.71965	9.41747	9.55533	9.45993	-3.82023	-3.41543	-2.2175	-2.04363	-1.55712	-1.25943	0.04741	-0.1176	0.74708	0.66438	0.78499	0.80649	0.531025	0.62314	0.548277	0.683128	0.270994	-0.363552	0.483615	0.74074	-0.198803	0.018748	-0.513996	-1.17004
13351018	AT1G51780	4.78971	5.02805	5.35332	4.6878	4.90393	4.99045	4.88964	4.50041	4.93424	5.81904	8.10831	9.41625	5.78729	4.59982	4.49637	4.32602	4.56184	5.5756	6.22125	4.74909	5.76237	6.45645	7.11489	9.42887	0.997581	-0.428226	-0.856948	-0.361786	-0.342088	0.585151	0.099925	-0.527639	-0.419075	1.13123	3.20438	4.4258	0.433959	0.149263	1.266	2.13043	2.55304	3.85327	0.334034	0.676902	1.68507	0.999196	-0.651333	-0.572533
13351025	AT1G51800	8.96511	7.93544	6.82	7.25815	6.9489	6.37215	9.19067	8.55951	8.68342	7.95941	7.76425	7.96534	9.23885	8.26405	6.63626	7.17177	7.5697	7.18028	9.45297	8.72051	7.83781	7.91314	7.92694	7.65406	0.273732	0.328617	-0.183742	-0.086385	0.620808	0.80813	0.225557	0.624072	1.86342	0.701255	0.815356	1.59319	0.214127	0.456458	1.20155	0.741374	0.357235	0.473782	-0.01143	-0.167614	-0.661869	0.040119	-0.458121	-1.11941
13353090	AT1G57630	10.008	8.01412	6.93947	7.68401	7.72212	7.55249	10.0154	8.99476	7.94314	8.4989	9.60023	10.5666	4.56924	3.55995	4.63959	3.63177	4.20597	3.96805	4.29314	3.96498	3.97414	4.80025	4.02004	4.54383	-5.43875	-4.45417	-2.29988	-4.05224	-3.51614	-3.58444	0.00746	0.980643	1.00367	0.814892	1.87811	3.0141	-0.2761	0.405031	-0.665458	1.16848	-0.185932	0.575787	-0.28356	-0.575612	-1.66913	0.353589	-2.06405	-2.43831
13353943	AT1G61120	5.41707	5.86437	6.28148	5.98384	6.35535	5.03275	5.67034	6.77993	6.73407	7.51219	9.21101	10.2522	5.15164	4.57048	5.09219	5.06371	5.05937	6.16462	6.21472	5.73319	5.95349	7.62737	7.02013	7.4141	-0.26543	-1.29389	-1.18929	-0.920135	-1.29598	1.13188	0.253272	0.915556	0.452589	1.52835	2.85567	5.21948	1.06308	1.16271	0.861304	2.56366	1.96076	1.24948	0.80981	0.247156	0.408715	1.03532	-0.894912	-3.97
13355474	AT1G65390	8.74498	5.47699	3.77545	7.00871	5.20966	3.98438	8.0561	5.15752	4.85219	7.61684	3.70237	2.98131	7.61198	5.28917	4.54967	5.68961	4.90783	4.73225	7.27603	5.21593	4.91654	6.97351	4.40649	4.88845	-1.133	-0.187822	0.774215	-1.3191	-0.301832	0.74787	-0.688873	-0.319471	1.07674	0.608131	-1.50729	-1.00307	-0.335944	-0.073232	0.366877	1.28391	-0.501341	0.156201	0.352929	0.246239	-0.709861	0.675776	1.00595	1.15927
13355627	AT1G65850	3.82912	3.98052	3.61969	3.96295	3.59462	3.68967	3.92282	3.64454	3.58364	3.20308	4.00151	3.70464	4.7611	4.43723	4.49429	4.21584	4.50659	4.96784	4.57584	4.74551	4.29662	4.86684	4.20633	4.51166	0.931976	0.456708	0.874598	0.252882	0.911973	1.27817	0.093702	-0.335975	-0.036052	-0.759871	0.406893	0.014973	-0.185255	0.308282	-0.197669	0.651	-0.300262	-0.456179	-0.278957	0.644257	-0.161617	1.41087	-0.707155	-0.471152
13355696	AT1G66090	4.56416	3.35233	3.24187	3.61164	3.65622	2.56588	4.54228	3.09183	3.56553	4.21259	3.94355	4.09175	4.91915	3.83146	3.34553	3.73617	3.54864	3.55407	5.19308	4.24374	4.32209	4.54033	3.82477	4.20151	0.354985	0.479127	0.10366	0.124528	-0.107582	0.988196	-0.021877	-0.260507	0.323664	0.600954	0.287329	1.52588	0.273931	0.412275	0.976564	0.804158	0.276124	0.64744	0.295808	0.672782	0.6529	0.203204	-0.011205	-0.878436
13355772	AT1G66370	4.61259	4.52401	5.33379	5.5813	5.98688	5.84922	4.105	4.94321	5.99548	6.53267	7.64048	8.84603	5.27682	5.28937	5.22933	4.74808	5.6238	6.10846	4.91858	5.28475	5.44357	6.43221	6.92779	8.08474	0.66423	0.765368	-0.104456	-0.833221	-0.36308	0.259241	-0.50759	0.419208	0.66169	0.951369	1.6536	2.99681	-0.358241	-0.004621	0.21424	1.68414	1.30399	1.97629	0.149349	-0.423829	-0.44745	0.732767	-0.349607	-1.02052
13357574	AT1G70700	10.634	10.2003	10.4072	10.6017	10.7345	10.3207	10.6901	10.492	10.8193	11.1911	11.2695	11.5925	10.5551	10.1263	10.0681	10.4952	10.7146	10.7485	11.0311	10.452	10.5515	11.2726	11.2904	11.476	-0.07889	-0.07397	-0.33904	-0.10654	-0.01992	0.42787	0.05606	0.2917	0.41209	0.58935	0.53492	1.27183	0.476	0.32569	0.48339	0.7774	0.57583	0.72751	0.41994	0.03399	0.0713	0.18805	0.04091	-0.54432
13358339	AT1G72520	7.47596	6.71582	6.55654	7.16005	6.98865	7.00642	7.37647	7.27486	7.03397	8.51734	8.22521	9.11704	8.09895	7.10558	6.91231	7.89811	7.35893	7.5716	8.36836	7.36484	7.14312	8.88496	7.91833	8.53144	0.622992	0.389759	0.355771	0.738062	0.37028	0.565179	-0.099488	0.559032	0.47744	1.35729	1.23656	2.11063	0.269407	0.259262	0.230811	0.986853	0.559398	0.959846	0.368895	-0.29977	-0.246629	-0.370439	-0.67716	-1.15078
13358490	AT1G72900	8.99263	8.78468	9.17619	8.54672	8.107	7.97442	9.33726	9.14475	9.67954	9.53043	8.5158	9.04868	9.82353	9.41422	9.81831	9.26343	9.09671	9.45652	10.382	10.0161	9.66414	10.3375	9.53352	9.51096	0.830905	0.62954	0.642126	0.716711	0.989712	1.4821	0.344636	0.36007	0.503355	0.983706	0.408806	1.07426	0.558448	0.601907	-0.154177	1.07405	0.436814	0.054434	0.213812	0.241837	-0.657532	0.090349	0.028008	-1.01982
13358494	AT1G72910	7.20376	6.20019	8.35631	7.07551	6.84585	6.96539	6.76964	6.22764	7.76266	7.9884	7.57227	7.73831	6.92761	7.49377	8.72845	7.36264	7.73935	7.91845	7.78139	7.99686	8.06287	8.62869	8.29077	7.99529	-0.27615	1.29357	0.372133	0.287126	0.893501	0.953058	-0.434128	0.027443	-0.593656	0.912892	0.726428	0.772923	0.853778	0.503095	-0.665579	1.26605	0.551418	0.076845	1.28791	0.475652	-0.071923	0.353158	-0.17501	-0.696078
13358498	AT1G72920	8.46982	8.84438	9.8931	8.67748	8.79585	8.33933	8.92996	8.40408	8.90974	9.74164	8.92764	9.63703	9.24817	9.45703	10.1273	9.15611	9.29026	9.76018	9.72353	9.59823	9.45326	10.3757	9.99154	10.1808	0.778347	0.612647	0.234175	0.478635	0.494405	1.42085	0.460141	-0.440299	-0.983357	1.06416	0.131784	1.29769	0.475363	0.141201	-0.67401	1.21957	0.701283	0.420668	0.015222	0.5815	0.309347	0.155407	0.569499	-0.877026
13361730	AT1G80840	8.59812	7.63098	8.75286	7.63001	7.24611	6.01705	9.00435	8.14849	8.32355	8.85985	7.15499	8.06154	9.64195	8.67944	9.1928	8.43252	7.80295	8.19289	10.3038	9.46992	8.46542	9.62443	7.63061	8.61428	1.04383	1.04846	0.439934	0.802509	0.556841	2.17584	0.406235	0.517508	-0.429314	1.22984	-0.091126	2.04449	0.661831	0.790481	-0.727379	1.19191	-0.172344	0.421386	0.255596	0.272973	-0.298065	-0.037925	-0.081218	-1.62311
13362548	AT1G02920	9.40184	8.55826	7.9531	7.62675	8.07804	7.35044	9.8864	9.77757	9.77471	8.60425	8.86185	9.55799	9.3103	9.17807	8.44739	8.32763	8.08618	8.45186	10.2754	10.0316	9.26085	9.07655	8.73208	9.05304	-0.091535	0.619819	0.494285	0.700873	0.008134	1.10142	0.484566	1.21932	1.8216	0.977494	0.7838	2.20755	0.965127	0.853555	0.813461	0.74892	0.645904	0.601182	0.480561	-0.365763	-1.00814	-0.228574	-0.137896	-1.60637
13369126	AT1G17380	5.81926	5.46615	5.89924	6.18544	6.05898	5.62242	5.8608	5.98378	6.39344	8.45739	8.97807	9.45973	6.18478	5.53848	5.29887	6.0614	5.77982	6.39296	6.19964	5.73572	5.86193	8.69275	8.21023	8.75329	0.365511	0.072333	-0.600368	-0.124045	-0.279162	0.770542	0.041536	0.517627	0.4942	2.27195	2.91909	3.8373	0.014868	0.197236	0.563059	2.63135	2.43041	2.36032	-0.026668	-0.320391	0.068859	0.359396	-0.488677	-1.47698
13370096	AT1G19640	6.71334	4.52411	5.13556	5.99902	7.03264	7.46976	6.3879	5.33662	5.02707	7.55247	8.73747	9.20491	6.04362	4.60259	4.25503	4.83625	5.97865	6.52555	6.44136	4.52758	5.05996	5.9446	7.70731	8.3677	-0.669719	0.078481	-0.880526	-1.16276	-1.05399	-0.944215	-0.325443	0.812513	-0.108494	1.55345	1.70483	1.73514	0.397739	-0.075014	0.804924	1.10835	1.72865	1.84215	0.723182	-0.887527	0.913418	-0.445103	0.023822	0.107005
13370131	AT1G19670	9.6782	9.35628	10.1414	9.8728	10.631	10.4276	9.69025	9.76104	10.7675	11.1301	11.4249	11.5671	9.23005	9.39479	9.3281	9.77745	10.4536	10.6161	9.82635	9.46673	10.3003	10.9919	11.2751	11.2973	-0.448155	0.038517	-0.813301	-0.095355	-0.17738	0.1886	0.012048	0.40476	0.62611	1.2573	0.79391	1.13956	0.596303	0.071939	0.972191	1.21446	0.82155	0.6811	0.584255	-0.332821	0.346081	-0.042835	0.02764	-0.45846
13370474	AT1G20510	8.86662	8.42463	8.61835	8.25242	8.95194	8.95946	8.62277	9.07586	9.09359	9.09359	10.0127	10.2663	9.24016	8.95907	8.89158	8.62504	9.25876	9.51956	9.2753	9.18554	9.12032	9.45332	9.77313	9.93794	0.373542	0.53444	0.273226	0.372617	0.306814	0.560101	-0.243852	0.651231	0.475239	0.841168	1.06072	1.30688	0.035135	0.226471	0.22874	0.828283	0.514375	0.418373	0.278987	-0.42476	-0.246499	-0.012885	-0.546341	-0.888504
13371259	AT1G22400	7.58271	6.6544	6.79342	6.95524	6.40983	5.57059	7.54375	7.24955	7.217	7.68693	6.89956	7.87672	7.02495	5.83821	5.99759	6.6459	5.44928	6.18777	7.68575	6.74834	6.50365	7.63303	6.48038	7.30466	-0.557754	-0.816193	-0.795836	-0.309344	-0.960557	0.617174	-0.038962	0.595145	0.423574	0.731689	0.489727	2.30613	0.660801	0.910128	0.506059	0.987126	1.0311	1.11689	0.699763	0.314983	0.082485	0.255437	0.541376	-1.18923
13372636	AT1G26420	5.26483	4.96255	3.99771	4.04412	4.46353	3.14533	6.19323	5.39531	6.06168	4.74067	4.41666	4.77022	6.11903	5.76015	5.2664	4.60482	4.4737	4.55778	7.57931	7.10424	6.22661	5.67516	5.63117	4.74948	0.854199	0.7976	1.26869	0.560694	0.010169	1.41245	0.928402	0.432767	2.06397	0.69655	-0.046874	1.62489	1.46028	1.3441	0.960214	1.07035	1.15747	0.191706	0.531876	0.911328	-1.10376	0.3738	1.20435	-1.43318
13373034	AT1G27730	8.98517	7.9527	8.99665	8.25679	6.49914	5.96572	9.0937	8.51862	8.36451	9.25209	6.78499	8.07722	9.27689	8.57525	9.03685	8.23924	6.96596	7.26741	9.69039	9.08729	8.37607	9.37899	7.66205	8.36047	0.291725	0.622549	0.040204	-0.017549	0.466824	1.30169	0.108533	0.565924	-0.632143	0.995301	0.285854	2.1115	0.413503	0.512042	-0.66078	1.13974	0.696089	1.09306	0.30497	-0.053882	-0.028637	0.144441	0.410235	-1.01844
13373301	AT1G28370	6.58292	5.74683	6.5919	6.42514	5.61858	5.77681	6.94669	6.5181	6.49904	7.85919	6.21566	6.85093	6.49752	7.00432	7.16763	6.04068	6.07425	6.71191	7.12431	7.6444	6.76774	7.87154	6.68475	6.69604	-0.085407	1.25748	0.575729	-0.384467	0.455667	0.9351	0.363763	0.77127	-0.092867	1.43405	0.597083	1.07412	0.626794	0.640081	-0.399891	1.83086	0.610498	-0.015869	0.263031	-0.131189	-0.307024	0.396811	0.013415	-1.08999
13373342	AT1G28480	3.72133	3.75615	3.89836	3.63578	4.16791	4.24476	3.63325	3.76333	5.60147	5.39449	7.07765	7.52182	5.00826	5.75002	6.34711	6.15459	6.10188	6.23863	5.99537	6.36299	6.66352	7.00085	7.14787	7.03468	1.28694	1.99387	2.44875	2.51881	1.93397	1.99386	-0.088073	0.007187	1.70311	1.75871	2.90974	3.27706	0.987106	0.612973	0.316418	0.846262	1.04599	0.796054	1.07518	0.605786	-1.38669	-0.912446	-1.86375	-2.48101
13374839	AT1G32350	5.19628	5.37453	4.90649	4.78418	5.10256	4.32338	6.17926	6.11326	6.43433	5.54084	6.2023	8.21188	7.84284	7.38048	6.6146	6.6545	6.57704	7.53757	9.02018	8.40305	7.38239	7.79608	7.14635	9.38595	2.64657	2.00595	1.70811	1.87032	1.47449	3.21419	0.982986	0.738726	1.52784	0.756666	1.09975	3.8885	1.17734	1.02256	0.767797	1.14159	0.569312	1.84838	0.194354	0.283839	-0.76004	0.38492	-0.530434	-2.04012
13374940	AT1G32640	7.07643	7.22022	7.6421	6.85489	7.39335	7.62014	7.04598	7.37506	8.00885	8.0458	8.64913	9.14503	6.86668	6.96987	7.58981	7.21782	7.72379	8.02017	7.65723	7.75219	7.77994	8.34889	8.65494	9.00362	-0.209745	-0.25035	-0.052293	0.362921	0.330439	0.400029	-0.030445	0.154847	0.366747	1.1909	1.25578	1.52489	0.790544	0.78232	0.190136	1.13107	0.931148	0.983451	0.820989	0.627473	-0.176611	-0.059832	-0.324637	-0.541439
13375603	AT1G35210	6.80624	5.63683	5.74058	5.32395	4.55561	4.58379	6.53991	6.0489	6.2211	6.86491	5.95741	6.14074	7.32956	6.92153	7.11315	6.34229	6.34487	6.66894	7.90102	7.53757	6.96743	7.31791	6.84768	6.86931	0.523323	1.28471	1.37258	1.01834	1.78926	2.08515	-0.266329	0.412073	0.480529	1.54096	1.4018	1.55695	0.571461	0.61604	-0.145718	0.975626	0.502817	0.200371	0.83779	0.203967	-0.626247	-0.565337	-0.89898	-1.35658
13375629	AT1G35260	4.99009	5.38394	5.74295	6.24603	6.49503	7.22686	4.83503	4.95551	6.45864	6.8635	6.87451	6.99818	5.79843	5.8935	6.89537	6.4803	7.32307	6.8873	5.10543	5.81175	6.4328	7.34828	6.70575	6.44197	0.808338	0.509554	1.15243	0.234268	0.828045	-0.339561	-0.155058	-0.428431	0.715695	0.617472	0.379481	-0.228682	-0.692998	-0.081743	-0.462573	0.867976	-0.617326	-0.445328	-0.53794	0.346688	-1.17827	0.250504	-0.996807	-0.216646
13376292	AT1G44350	7.37309	7.85937	8.08784	7.41586	7.79229	7.32351	7.57691	7.86296	8.13289	8.17624	9.13611	9.76382	7.12172	7.48082	7.87917	7.1756	7.10158	7.37924	7.17694	7.39923	7.57883	8.08942	8.38337	9.25017	-0.251372	-0.378541	-0.20867	-0.240258	-0.690707	0.055734	0.203823	0.003593	0.04505	0.760385	1.34382	2.44032	0.055225	-0.08159	-0.300348	0.913821	1.28178	1.87093	-0.148598	-0.085183	-0.345398	0.153436	-0.062038	-0.569386
13378498	AT1G52040	8.15758	7.25404	8.04563	7.92374	8.92558	9.59188	8.46589	7.0818	7.91731	8.69175	10.0478	10.8437	4.64675	4.31245	4.47085	4.41754	4.72517	5.79322	4.52795	4.33728	3.94733	6.10548	6.88022	9.60058	-3.51082	-2.94159	-3.57478	-3.50619	-4.20041	-3.79866	0.308309	-0.172236	-0.128322	0.76801	1.12219	1.25184	-0.118801	0.024831	-0.523516	1.68794	2.15505	3.80735	-0.42711	0.197067	-0.395194	0.91993	1.03286	2.55551
13378857	AT1G52890	5.79756	6.25838	6.59356	5.18463	5.91861	6.7142	6.63446	6.72369	6.54521	5.92272	7.34782	9.55929	6.01731	6.79168	7.16981	5.18879	5.88921	6.94187	7.65754	7.59228	7.25324	7.14661	7.12512	9.54218	0.219743	0.5333	0.576254	0.004164	-0.029409	0.227669	0.836894	0.465306	-0.048349	0.738095	1.4292	2.84509	1.64024	0.8006	0.083431	1.95782	1.23592	2.60031	0.803343	0.335294	0.13178	1.21973	-0.193286	-0.244774
13382114	AT1G61890	8.17948	8.22567	8.66774	8.5358	8.17306	8.8124	7.8783	7.97326	8.53866	9.30076	8.88565	9.51269	7.73132	7.98935	8.4494	8.1994	8.30556	8.58581	7.61914	7.88579	8.4294	9.02804	8.6349	8.87844	-0.448156	-0.236325	-0.218341	-0.336404	0.132494	-0.226589	-0.30118	-0.252406	-0.129076	0.764961	0.71259	0.700291	-0.112183	-0.10356	-0.020002	0.828645	0.329346	0.292639	0.188997	0.148846	0.109074	0.063684	-0.383244	-0.407652
13385529	AT1G69890	8.76001	8.40126	7.88095	7.88163	6.66276	5.14925	9.04075	8.8281	7.92517	8.50237	6.14844	5.68618	8.91246	8.57061	8.24814	8.04047	6.51834	5.3701	9.16423	9.05055	8.12393	8.76969	5.50438	5.60205	0.152445	0.169342	0.367193	0.158834	-0.144421	0.220854	0.280739	0.426837	0.044223	0.620739	-0.514329	0.536936	0.251777	0.479943	-0.124207	0.729221	-1.01397	0.231948	-0.028962	0.053106	-0.16843	0.108482	-0.499638	-0.304988
13387713	AT1G75450	7.00162	6.87205	6.72741	5.46962	7.45219	7.04405	6.74582	6.66438	6.97966	6.31565	7.85189	7.93957	6.77298	6.51389	6.48579	5.82989	7.02503	6.39614	6.64738	6.81234	7.04265	6.7996	6.98768	7.39795	-0.228645	-0.35816	-0.241625	0.36028	-0.427156	-0.647913	-0.255799	-0.207676	0.252247	0.846033	0.399703	0.895526	-0.1256	0.298446	0.556859	0.969708	-0.037356	1.00182	0.130199	0.506122	0.304612	0.123675	-0.437059	0.106292
13388200	AT1G76650	5.39795	4.59336	5.40275	4.20594	3.64853	3.74381	5.32596	4.14578	4.59974	5.5047	4.07006	4.4997	4.59372	4.41253	5.02019	4.39595	4.12998	3.8238	4.92717	4.90241	4.22363	5.49808	3.52557	4.82556	-0.804228	-0.180825	-0.382562	0.190008	0.481454	0.079999	-0.071987	-0.447574	-0.803009	1.29877	0.421537	0.7559	0.333447	0.489875	-0.79656	1.10213	-0.604412	1.00176	0.405434	0.937449	0.006449	-0.196634	-1.02595	0.245856
13389720	AT1G79680	6.03665	5.70313	5.75156	5.28286	5.02983	4.63033	6.91205	6.65659	6.32501	6.29187	6.28895	7.51993	6.97499	6.60754	6.21665	6.40218	5.54056	6.05757	7.72416	6.93295	6.64316	7.4177	6.22719	7.394	0.938339	0.904409	0.465089	1.11933	0.510727	1.42725	0.8754	0.953467	0.573448	1.00901	1.25912	2.8896	0.749173	0.325416	0.426506	1.01551	0.686633	1.33642	-0.126227	-0.628051	-0.146942	0.0065	-0.572486	-1.55318
13392927	AT2G14560	9.66303	8.40613	9.33372	8.50056	9.26172	9.81775	9.29127	8.80665	10.2137	9.3428	10.2129	10.5689	9.84756	10.3795	10.8534	10.2503	10.3912	10.7927	10.2189	10.6485	10.4555	10.9826	10.5917	10.5018	0.184532	1.97339	1.51966	1.74979	1.12946	0.974896	-0.371752	0.400517	0.879989	0.842242	0.951136	0.751106	0.371392	0.26899	-0.39792	0.73224	0.20052	-0.29088	0.743144	-0.131527	-1.27791	-0.110002	-0.750616	-1.04199
13394245	AT2G18690	9.59581	8.78215	7.97316	7.77143	8.26244	6.81413	9.83964	9.49818	9.04669	8.6654	8.34489	8.9737	9.52811	9.15572	8.39323	8.4153	8.03003	8.34248	9.84161	9.44608	8.71343	9.07247	8.44225	8.8162	-0.067707	0.373566	0.420069	0.643871	-0.232412	1.52835	0.243821	0.716025	1.07353	0.893971	0.082447	2.15958	0.313506	0.290356	0.320199	0.657165	0.41222	0.473716	0.069685	-0.425669	-0.753331	-0.236806	0.329773	-1.68586
13396292	AT2G23270	5.07486	4.60933	5.01523	4.65687	5.12093	4.46703	5.63163	5.57069	5.27171	5.81309	4.93552	5.74657	7.3289	6.11765	5.33869	6.05197	5.54278	5.66794	8.20857	7.30459	5.51531	7.53445	5.5331	6.7948	2.25404	1.50832	0.323459	1.3951	0.42185	1.20091	0.556763	0.961356	0.256479	1.15622	-0.18541	1.27954	0.879666	1.18694	0.176621	1.48248	-0.009683	1.12685	0.322903	0.225586	-0.079858	0.326265	0.175727	-0.152682
13396401	AT2G23680	8.692	7.93807	8.42848	7.69896	7.1394	7.73639	8.65504	8.43057	9.03439	8.35208	8.17903	8.72253	8.63284	8.16987	8.62414	8.38222	8.31554	8.65758	8.96046	8.70734	8.81892	9.06991	8.81207	8.87117	-0.059169	0.231799	0.195657	0.683255	1.17614	0.921191	-0.036967	0.4925	0.605905	0.653124	1.03963	0.986141	0.32762	0.53747	0.194782	0.687696	0.496529	0.213593	0.364587	0.04497	-0.411123	0.034572	-0.543105	-0.772548
13397254	AT2G26020	8.8274	7.31996	6.91518	6.37391	8.55456	6.30577	8.73878	8.6759	8.55204	7.96562	9.38522	7.8074	6.48104	5.07971	4.5015	4.98492	6.04615	5.86	8.10923	7.34063	6.72055	6.57144	7.41871	6.24118	-2.34635	-2.24025	-2.41368	-1.38899	-2.50841	-0.445766	-0.088616	1.35594	1.63686	1.59171	0.830661	1.50164	1.62819	2.26092	2.21904	1.58652	1.37255	0.381175	1.7168	0.904986	0.582181	-0.00519	0.541892	-1.12046
13398846	AT2G30020	7.1638	7.38138	8.3214	7.88679	7.58061	7.49073	7.35669	7.51099	7.55286	8.68171	7.48988	8.19999	8.17619	7.90528	8.52894	7.87779	7.87707	8.02557	8.11047	8.38873	7.93885	9.01619	7.9428	8.34909	1.01239	0.523894	0.207545	-0.009005	0.296454	0.534838	0.192882	0.129606	-0.768533	0.79492	-0.090738	0.709265	-0.065715	0.483457	-0.590089	1.13841	0.065732	0.323525	-0.258597	0.353851	0.178444	0.343487	0.15647	-0.38574
13399525	AT2G31945	4.04226	4.45436	4.24424	3.63375	4.25597	3.41399	4.36294	4.58324	4.60033	4.2448	3.56204	4.79882	5.38257	5.50717	5.55405	5.10518	5.15193	4.39616	6.5555	6.50975	5.79984	6.09596	4.77234	6.0098	1.34031	1.05281	1.30981	1.47143	0.895964	0.982177	0.320681	0.128874	0.356093	0.611052	-0.693925	1.38483	1.17293	1.00258	0.245787	0.990776	-0.379588	1.61364	0.852251	0.873703	-0.110306	0.379724	0.314337	0.228808
13400703	AT2G34600	4.93476	5.24648	4.82805	4.81892	4.93179	4.07982	5.19772	5.21879	5.24093	5.59427	5.70262	6.13966	4.95416	5.09832	4.80411	5.12569	4.37516	4.85705	5.16935	4.55028	5.36176	5.88469	5.61767	5.92203	0.019406	-0.148158	-0.023934	0.306772	-0.55663	0.777236	0.262958	-0.027688	0.412883	0.775344	0.770831	2.05984	0.215189	-0.548046	0.55765	0.758995	1.24251	1.06498	-0.047769	-0.520358	0.144767	-0.016349	0.471679	-0.994859
13402643	AT2G39030	7.18673	7.08132	7.60875	6.94527	8.22568	7.70453	7.57362	7.97549	8.28642	8.75288	11.215	12.1381	5.43866	6.06832	5.65497	4.95851	5.77763	8.2758	6.91105	6.62834	6.57897	8.85166	10.9216	11.6187	-1.74807	-1.013	-1.95379	-1.98676	-2.44804	0.571276	0.386892	0.894164	0.67767	1.80761	2.9893	4.43357	1.47239	0.560016	0.924009	3.89315	5.14395	3.34285	1.0855	-0.334148	0.246339	2.08554	2.15464	-1.09073
13405102	AT2G44840	2.76801	2.56894	2.35141	2.60904	2.53561	2.21454	3.09913	2.31832	2.77204	3.31453	2.8929	3.07023	2.58075	2.42279	2.85624	3.05768	2.59028	3.00354	3.08453	2.82186	2.82252	3.88386	3.0242	2.96511	-0.18726	-0.146145	0.504834	0.448646	0.054663	0.788995	0.331113	-0.250619	0.42063	0.70549	0.357288	0.85569	0.503774	0.399068	-0.033718	0.82618	0.433919	-0.038424	0.172661	0.649687	-0.454348	0.12069	0.076631	-0.894114
13405905	AT2G46650	5.10987	4.88583	5.63907	5.81116	7.34847	7.90837	5.19809	5.81955	6.44806	6.43843	8.13851	8.21001	6.77184	6.86733	6.70859	6.77794	8.19068	8.27175	6.85894	7.11045	7.31052	7.83966	8.19736	8.45686	1.66197	1.9815	1.06952	0.966785	0.842207	0.363382	0.088222	0.93372	0.808996	0.627273	0.790036	0.30164	0.087098	0.243115	0.60193	1.06172	0.006683	0.185111	-0.001124	-0.690605	-0.207066	0.434443	-0.783353	-0.116529
13408088	AT2G06050	6.22379	6.58104	6.78665	6.39471	6.8661	6.79167	6.6263	6.7237	7.33923	7.28617	8.0423	8.40494	7.51725	7.37183	7.55324	6.73114	7.18386	7.55507	8.07264	7.80014	7.42236	8.2134	8.17278	8.57829	1.29345	0.790787	0.76659	0.336428	0.317757	0.7634	0.402504	0.142654	0.552582	0.891459	1.1762	1.61327	0.555398	0.428308	-0.130873	1.48226	0.988921	1.02322	0.152894	0.285654	-0.683455	0.590798	-0.187277	-0.590049
13412564	AT2G24850	5.95355	5.58815	5.79136	6.27228	6.74879	6.94033	6.04627	5.9272	6.61818	8.38726	10.6113	11.0916	6.35613	5.7165	5.75076	7.8876	7.63336	9.62445	7.42993	6.09539	6.76727	9.57718	10.5119	10.5106	0.402585	0.128344	-0.040599	1.61532	0.884565	2.68412	0.092722	0.339047	0.826825	2.11498	3.86254	4.15127	1.0738	0.378894	1.01651	1.68958	2.87855	0.88615	0.981079	0.039847	0.189688	-0.425401	-0.983985	-3.26512
13413277	AT2G26530	7.95357	7.52548	7.94551	7.50136	7.89518	6.77072	8.13055	7.89518	7.53545	8.1756	8.15453	8.04539	7.35188	6.96707	7.03922	6.8909	7.0202	7.249	7.99875	7.1751	7.1853	8.18897	7.85795	8.08707	-0.601692	-0.558418	-0.906297	-0.610461	-0.874986	0.478276	0.176976	0.369697	-0.410064	0.674237	0.259354	1.27467	0.646874	0.208037	0.14609	1.29807	0.837753	0.838074	0.469898	-0.16166	0.556154	0.623833	0.578399	-0.436597
13413305	AT2G26560	10.3216	9.65231	8.25858	8.04192	8.19339	6.6195	10.2984	10.3948	9.77683	9.18084	7.9423	8.02789	11.13	10.4708	10.1066	9.74744	9.67832	9.75475	11.4312	10.9974	10.2466	10.4158	9.71536	9.86725	0.80834	0.818461	1.84806	1.70551	1.48493	3.13525	-0.02324	0.742501	1.51825	1.13892	-0.251084	1.4084	0.30123	0.52667	0.13997	0.668371	0.037041	0.112498	0.32447	-0.215831	-1.37828	-0.47055	0.288125	-1.2959
13413731	AT2G27310	8.18552	7.88565	7.38793	7.10182	7.61139	7.57892	8.26874	8.40788	8.15743	8.01848	8.54528	9.01705	8.18401	7.77993	8.18401	7.99322	7.89563	7.9526	8.91911	8.44883	8.45683	8.85736	8.46658	8.37376	-0.001511	-0.105721	0.796081	0.8914	0.284244	0.373678	0.083218	0.522227	0.769502	0.916656	0.933898	1.43813	0.735096	0.668899	0.272824	0.864136	0.570952	0.421158	0.651878	0.146672	-0.496678	-0.05252	-0.362946	-1.01697
13415110	AT2G30750	2.38199	2.51986	2.18807	2.32846	2.24176	2.13449	2.98616	2.81075	4.27025	3.26757	3.07584	3.48624	3.55818	2.98669	2.57949	2.51964	2.37095	2.11087	4.73882	4.37907	3.70771	4.57683	3.12837	2.92215	1.17619	0.466825	0.391424	0.19118	0.129196	-0.023615	0.604161	0.290889	2.08218	0.93911	0.834078	1.35175	1.18064	1.39239	1.12822	2.05719	0.757417	0.81128	0.576476	1.1015	-0.953961	1.11808	-0.076661	-0.540469
13416340	AT2G33380	7.64881	7.38995	7.8945	7.13884	10.1989	10.8429	7.57087	7.57984	8.13929	7.94615	10.8556	11.694	7.44262	8.09224	8.08415	8.12031	10.1868	10.5456	7.78301	8.47813	8.64246	8.84033	10.364	11.42	-0.206189	0.702292	0.189643	0.981471	-0.01203	-0.29731	-0.077944	0.189892	0.24479	0.80731	0.65676	0.85109	0.340392	0.385892	0.558314	0.720019	0.17715	0.87442	0.418336	0.196	0.313524	-0.087291	-0.47961	0.02333
13417425	AT2G35930	8.89959	8.221	7.93038	8.49249	8.06199	6.8001	9.21561	8.58945	8.46112	9.14601	8.27464	7.855	9.63727	8.33215	8.1868	8.90274	8.03923	6.82359	9.93074	9.14399	8.34169	9.8812	8.53375	8.11801	0.737679	0.111145	0.256415	0.410258	-0.022764	0.023485	0.316018	0.368449	0.530734	0.653527	0.212649	1.05489	0.293465	0.811841	0.154897	0.978454	0.494517	1.29442	-0.022553	0.443392	-0.375837	0.324927	0.281868	0.23953
13421994	AT2G46400	6.24191	4.89396	4.77454	5.03901	5.45032	5.42975	6.38657	5.31927	5.51548	5.70296	6.48423	7.68761	6.98853	6.12735	5.82332	6.78819	7.10211	7.41518	7.36534	6.52402	6.34775	7.90996	7.47302	7.9067	0.746616	1.23339	1.04877	1.74918	1.65179	1.98542	0.144654	0.425303	0.740935	0.663953	1.03391	2.25786	0.376814	0.396663	0.524433	1.12177	0.370918	0.491522	0.23216	-0.02864	-0.216502	0.457816	-0.662997	-1.76634
13423502	AT3G02840	4.38702	3.76834	3.50199	3.65077	3.35063	3.69591	4.58065	4.06326	4.05517	4.43275	3.47393	3.83359	5.91107	4.58491	4.36603	4.34941	4.30131	4.6471	6.02097	5.12931	4.44525	5.61812	4.53667	4.43166	1.52405	0.816561	0.864047	0.698644	0.950679	0.95119	0.193625	0.294916	0.553182	0.78198	0.123299	0.137684	0.109897	0.544403	0.079216	1.2687	0.235366	-0.215434	-0.083728	0.249487	-0.473966	0.486721	0.112067	-0.353118
13426792	AT3G11340	7.81556	5.50995	5.23083	5.28057	5.65372	5.47363	8.12615	7.08598	7.53156	6.5268	9.43802	9.92194	8.64777	8.27882	7.39822	8.67672	8.27143	9.82554	9.94489	9.5543	8.41872	9.80668	10.3321	10.1306	0.832211	2.76886	2.16739	3.39615	2.6177	4.35191	0.310589	1.57603	2.30073	1.24623	3.7843	4.4483	1.29712	1.27549	1.02051	1.12996	2.06069	0.305079	0.986527	-0.300544	-1.28022	-0.116266	-1.72361	-4.14322
13426859	AT3G11480	2.97537	2.96045	3.03002	3.286	2.89122	2.99568	3.29356	2.91037	3.07502	4.1212	6.87457	8.52447	3.41845	3.37677	3.00453	2.99335	3.19677	3.05062	3.36406	2.97569	3.53638	4.44154	4.51191	6.65046	0.443084	0.416318	-0.025493	-0.292644	0.305548	0.054937	0.318188	-0.050082	0.044998	0.835201	3.98335	5.52879	-0.05439	-0.40108	0.531846	1.44819	1.31515	3.59984	-0.372578	-0.350998	0.486848	0.612989	-2.6682	-1.92895
13427382	AT3G12900	4.88834	5.16999	5.19695	5.34106	5.09001	5.36711	4.81854	5.26198	4.72393	4.37052	4.69161	4.28477	5.45727	4.93527	5.05419	5.34891	5.14565	5.47967	5.63368	5.33612	4.25636	4.35077	5.6954	5.15169	0.568928	-0.234719	-0.14276	0.007845	0.055643	0.112557	-0.069797	0.091983	-0.47302	-0.970545	-0.398396	-1.08234	0.176417	0.400844	-0.797834	-0.998139	0.549755	-0.32798	0.246214	0.308861	-0.324814	-0.027594	0.948151	0.75436
13428695	AT3G15500	6.10445	5.53094	5.03512	3.68171	4.9612	4.35	5.97366	6.36951	5.86254	4.68056	4.80176	6.57412	6.38732	6.15154	5.69817	4.80263	4.9344	4.9498	7.31455	7.22057	5.98113	6.1372	4.65573	6.03479	0.282876	0.620599	0.66306	1.12092	-0.026801	0.599803	-0.130788	0.838569	0.82743	0.998852	-0.159435	2.22412	0.927228	1.06903	0.282955	1.33457	-0.278665	1.08499	1.05802	0.23046	-0.544475	0.33572	-0.11923	-1.13913
13432135	AT3G23250	6.67966	6.42179	5.75181	5.25256	5.66316	5.00471	7.32949	6.81468	7.38148	6.27916	6.18027	6.58613	6.59081	6.53309	5.86126	5.28529	5.63369	5.87271	7.9378	7.15133	6.66761	7.19221	6.11644	6.48611	-0.088849	0.111296	0.10945	0.032732	-0.029466	0.868	0.649829	0.392892	1.62967	1.02661	0.517112	1.58142	1.34699	0.618246	0.806344	1.90692	0.482744	0.613401	0.697162	0.225354	-0.823322	0.880313	-0.034368	-0.968022
13433243	AT3G25760	7.74462	7.30105	6.91	6.70758	8.19316	8.14892	8.10212	7.72416	7.85789	8.0672	9.03364	9.30235	8.51477	7.89603	7.15604	7.0463	7.89682	8.17435	9.03053	8.46707	8.19456	8.5139	8.95619	9.36868	0.770145	0.594985	0.246038	0.33872	-0.296341	0.025431	0.357499	0.423115	0.947888	1.35962	0.840472	1.15343	0.515756	0.571036	1.03851	1.46761	1.05936	1.19433	0.158257	0.147921	0.090625	0.107986	0.218891	0.040901
13433248	AT3G25770	8.06893	8.64952	8.64678	6.75452	7.91961	8.10057	8.25332	8.75907	9.48284	8.4152	8.85907	9.36443	8.31963	8.79856	8.39174	7.17633	7.86653	8.55873	8.77295	8.89267	8.7111	7.89831	8.53794	8.85935	0.250698	0.149037	-0.255048	0.421809	-0.053078	0.458152	0.184385	0.109552	0.836052	1.66068	0.939458	1.26385	0.453319	0.094109	0.319358	0.721988	0.671408	0.300621	0.268934	-0.015443	-0.516694	-0.938693	-0.26805	-0.96323
13433253	AT3G25780	5.06926	4.84291	4.62237	5.13774	4.77372	4.72214	5.39703	5.37221	5.51443	6.03433	6.34634	7.21058	6.43135	6.09926	6.19466	5.95974	5.86103	6.6018	7.39818	6.63918	6.54141	7.34551	7.45485	7.91495	1.36208	1.25635	1.57229	0.821992	1.0873	1.87966	0.32777	0.529298	0.892066	0.896591	1.57262	2.48843	0.966833	0.539922	0.346755	1.38577	1.59382	1.31316	0.639063	0.010624	-0.545311	0.489181	0.021199	-1.17528
13433736	AT3G26830	6.47828	6.55619	6.5713	6.21988	5.98194	5.64876	7.89883	8.12749	8.37772	7.40619	7.17373	8.59464	8.89339	8.40542	8.06219	8.46093	7.15857	8.59363	10.0118	9.49856	8.76593	9.40712	7.99582	9.17425	2.41511	1.84924	1.49089	2.24105	1.17663	2.94487	1.42055	1.5713	1.80641	1.1863	1.19179	2.94588	1.11841	1.09313	0.703743	0.946191	0.837249	0.580624	-0.302142	-0.478169	-1.10267	-0.240114	-0.354542	-2.36525
13434325	AT3G28580	5.50108	4.574	4.32225	4.44551	4.70628	5.05176	4.96733	4.64329	5.43919	6.12225	6.34486	7.76225	7.42495	6.40516	6.50247	7.38101	5.93446	7.02008	7.59564	7.31817	6.38793	8.36441	7.19456	7.92657	1.92388	1.83115	2.18022	2.9355	1.22818	1.96832	-0.533745	0.069282	1.11695	1.67674	1.63858	2.71049	0.17069	0.913013	-0.114538	0.983393	1.2601	0.90649	0.704435	0.843731	-1.23149	-0.693347	-0.378481	-1.804
13435079	AT3G43250	3.42884	3.2054	3.00127	3.1437	3.28066	3.13236	3.6533	3.56731	4.06507	4.06925	4.5433	5.6758	3.52304	3.44683	3.37365	3.80902	3.07234	3.38307	4.62455	3.46617	3.52922	5.90437	4.03973	4.52011	0.094195	0.241436	0.372387	0.665317	-0.208322	0.25071	0.224464	0.361917	1.06381	0.925553	1.26264	2.54344	1.10151	0.019336	0.155564	2.09536	0.967394	1.13704	0.877046	-0.342581	-0.908244	1.16981	-0.295248	-1.4064
13435626	AT3G44830	3.32297	3.5951	3.32156	3.53346	4.24805	3.73781	4.37389	4.13145	3.92418	4.11459	3.97098	3.82338	4.13103	4.58959	4.29861	3.69844	3.88497	4.24568	4.79363	4.90768	3.79996	4.9627	4.1564	4.91143	0.80806	0.994495	0.977055	0.164984	-0.36308	0.507865	1.05091	0.53635	0.602627	0.581126	-0.277073	0.08557	0.6626	0.318092	-0.498647	1.26426	0.271427	0.665753	-0.388314	-0.218258	-1.10127	0.683134	0.5485	0.580183
13437483	AT3G49620	6.47827	5.80317	6.18425	6.28583	5.39691	4.56486	6.62877	6.58107	7.07265	6.92894	5.43082	5.97694	5.76693	4.7638	4.03122	4.49526	4.6807	3.926	6.55549	5.80557	4.86097	6.56052	4.51197	6.29215	-0.711336	-1.03936	-2.15303	-1.79057	-0.716212	-0.638857	0.150498	0.777907	0.888393	0.643111	0.033909	1.41208	0.788561	1.04177	0.829746	2.06526	-0.168734	2.36614	0.638063	0.263862	-0.058647	1.42215	-0.202643	0.954066
13437528	AT3G49690	4.21176	3.82418	4.24307	4.5519	4.03831	4.55747	4.3487	4.19632	4.10239	3.88751	4.64024	4.69973	4.15106	4.46756	4.65761	5.02464	4.31546	4.32317	3.99449	4.26485	4.02958	4.33127	4.06851	4.43285	-0.060697	0.643377	0.414533	0.472733	0.277157	-0.2343	0.136934	0.372138	-0.140678	-0.664392	0.601937	0.14226	-0.156578	-0.202706	-0.628027	-0.693363	-0.246958	0.109678	-0.293512	-0.574844	-0.487349	-0.028971	-0.848895	-0.032582
13437854	AT3G50930	6.03625	5.56885	5.6394	5.75818	5.56429	5.61491	6.36524	5.7762	5.95747	6.3588	6.31708	7.18639	7.48813	6.66363	6.70951	6.88511	6.72109	7.19346	7.75804	7.21676	6.89465	7.73125	7.02248	7.47306	1.45188	1.09478	1.07011	1.12693	1.1568	1.57855	0.32899	0.207345	0.318065	0.600622	0.752788	1.57148	0.269913	0.553122	0.185141	0.84614	0.301384	0.279597	-0.059077	0.345777	-0.132924	0.245518	-0.451404	-1.29188
13438085	AT3G51450	6.97179	6.22025	6.07058	5.39147	6.9698	7.3987	7.13046	6.56817	7.1147	6.73007	8.93441	9.57911	7.47537	7.18875	7.45861	6.69645	7.71871	8.57922	8.19368	7.94655	8.01443	8.08408	9.29833	9.35983	0.503578	0.9685	1.38803	1.30499	0.748918	1.18051	0.158667	0.347924	1.04411	1.33861	1.96462	2.18041	0.718309	0.757803	0.555811	1.38763	1.57961	0.78061	0.559642	0.409879	-0.488303	0.04902	-0.385006	-1.3998
13440042	AT3G55980	7.72128	7.44631	7.81299	7.83935	7.50054	7.06441	7.88495	7.39499	7.76507	8.51335	7.19405	7.09908	8.19058	7.37244	8.03335	7.7977	7.70573	7.31855	8.31914	7.85193	7.56091	8.46772	7.75313	7.50672	0.469297	-0.073862	0.220356	-0.041648	0.20519	0.254145	0.163671	-0.051313	-0.047916	0.674007	-0.30649	0.034669	0.128562	0.479481	-0.472438	0.670017	0.047405	0.188171	-0.035109	0.530794	-0.424522	-0.00399	0.353895	0.153502
13443795	AT3G02800	9.22727	7.96977	8.53594	8.97669	7.60718	7.26807	9.19278	8.72542	8.79071	9.61195	7.81054	8.07357	9.86062	8.90922	9.35991	9.50521	8.55666	8.15362	10.2316	9.59043	9.25895	10.2754	8.615	8.54941	0.633344	0.939454	0.823967	0.528525	0.949485	0.885553	-0.034488	0.755654	0.254769	0.635262	0.203364	0.805508	0.370984	0.681207	-0.100957	0.770159	0.058334	0.39579	0.405472	-0.074447	-0.355726	0.134897	-0.14503	-0.409718
13452877	AT3G23550	10.6824	8.82756	8.25681	9.21878	9.07289	6.02928	10.6802	10.2485	9.95375	10.2929	9.15867	7.66326	10.369	7.62539	6.51823	8.18086	7.21515	6.54197	10.7632	9.186	7.85227	9.82968	7.24679	6.77136	-0.31346	-1.20216	-1.73858	-1.03792	-1.85774	0.512695	-0.00227	1.42092	1.69694	1.07412	0.085779	1.63398	0.39422	1.5606	1.33404	1.64883	0.031638	0.229385	0.39649	0.139678	-0.362895	0.574703	-0.054141	-1.4046
13453509	AT3G25010	7.89775	8.72744	8.00727	8.19522	8.38633	9.32321	8.26798	8.28149	8.7414	8.85568	9.84209	10.7865	4.46661	4.54367	5.37582	4.78501	5.3845	6.12108	4.95373	5.20948	4.86418	5.57184	5.95628	6.74216	-3.43113	-4.18377	-2.63145	-3.41022	-3.00183	-3.20213	0.370234	-0.445943	0.734126	0.660456	1.45575	1.46325	0.487115	0.665813	-0.511647	0.786839	0.571778	0.621077	0.116881	1.11176	-1.24577	0.126383	-0.883977	-0.842175
13454876	AT3G28740	4.40858	4.3989	5.16901	5.67764	6.32939	6.3846	4.58632	5.31683	6.01937	8.2064	8.77271	8.15517	4.48119	4.28913	4.53562	4.60032	5.37749	5.15688	5.02663	4.74634	4.96742	7.67788	6.96242	5.7003	0.072615	-0.109768	-0.633391	-1.07731	-0.951897	-1.22772	0.177745	0.917928	0.850364	2.52877	2.44332	1.77057	0.545432	0.457205	0.431801	3.07755	1.58493	0.543418	0.367687	-0.460723	-0.418563	0.548784	-0.858393	-1.22715
13454944	AT3G28930	10.0699	9.76831	9.55122	9.11542	9.24149	9.92927	10.1024	10.0844	10.592	9.95678	10.0338	10.2198	10.5165	10.2293	10.3376	9.81695	9.8298	10.4227	10.7094	10.7013	10.343	10.6317	10.2582	10.356	0.4466	0.460942	0.786333	0.701532	0.588301	0.493462	0.03248	0.316092	1.04078	0.841355	0.792306	0.290552	0.1929	0.47208	0.00548	0.814706	0.428415	-0.06676	0.16042	0.155988	-1.0353	-0.026649	-0.363891	-0.357312
13455957	AT3G44260	7.30807	7.37583	8.71091	7.53297	6.62369	6.02567	7.48155	7.24955	7.8162	8.35425	6.04557	6.06531	6.76793	7.08607	8.06985	6.71339	6.26064	5.72085	7.14585	7.71919	6.40538	7.58786	6.50116	6.17685	-0.540145	-0.289756	-0.641064	-0.819582	-0.363053	-0.304819	0.173475	-0.126277	-0.894713	0.821284	-0.578122	0.039641	0.37792	0.63312	-1.66447	0.874473	0.240526	0.456002	0.204445	0.759397	-0.769759	0.053189	0.818648	0.416361
13456358	AT3G45410	3.88338	3.71322	4.07451	3.17164	4.11887	3.98382	4.3159	4.34276	3.75169	4.00102	3.84551	3.59531	4.75399	4.82584	3.40761	3.65472	4.39039	3.55533	4.07941	3.60458	3.34299	4.39308	3.96059	4.32385	0.870609	1.11262	-0.666904	0.48308	0.271516	-0.428494	0.432514	0.629538	-0.322825	0.829376	-0.273362	-0.388518	-0.674581	-1.22126	-0.064622	0.73836	-0.429795	0.768516	-1.10709	-1.8508	0.258203	-0.091016	-0.156433	1.15703
13460870	AT3G56710	6.48948	6.02463	6.95864	5.41205	6.19876	6.54098	6.8239	6.32469	7.46205	6.32878	7.17302	7.91999	7.33344	7.91049	8.41572	7.33448	7.71644	8.20242	8.31199	8.59402	8.37841	8.20472	8.42378	8.27568	0.843954	1.88586	1.45708	1.92242	1.51768	1.66144	0.334419	0.300066	0.503416	0.916732	0.974263	1.37902	0.978559	0.68353	-0.037308	0.870241	0.707342	0.073261	0.64414	0.383464	-0.540724	-0.046491	-0.266921	-1.30576
13461191	AT3G57460	7.39123	5.61745	4.77289	5.27597	5.68068	6.22926	7.98059	6.09879	6.14907	7.24523	9.03514	9.70827	4.94392	4.40747	4.30643	4.96641	5.0391	5.1044	5.55525	4.81426	4.54772	6.24409	6.52676	6.31919	-2.44731	-1.20998	-0.466461	-0.309565	-0.641572	-1.12485	0.58936	0.481344	1.37618	1.96926	3.35447	3.47901	0.611331	0.406789	0.241287	1.27769	1.48766	1.21479	0.021971	-0.074555	-1.13489	-0.691571	-1.86681	-2.26423
13467377	AT4G11280	6.38378	5.9407	6.70582	6.43833	6.35622	6.27792	6.58164	6.11343	6.21842	7.25026	6.5966	6.75104	6.70262	6.47353	6.44277	6.45714	6.63725	6.86771	7.82493	6.79792	6.28368	7.39871	6.75731	7.30026	0.318839	0.532827	-0.263053	0.018805	0.281031	0.589781	0.197857	0.172731	-0.487407	0.811926	0.240383	0.473117	1.12231	0.324387	-0.159093	0.94157	0.120058	0.432559	0.92445	0.151656	0.328314	0.129644	-0.120325	-0.040558
13469960	AT4G17500	6.8936	6.85373	7.3087	6.09394	6.44186	5.29278	7.4669	7.54857	7.29926	7.26772	6.1862	6.57202	7.83584	7.06214	7.00635	6.55692	6.39639	6.90334	8.49007	8.07268	7.43629	8.19086	6.80582	7.73762	0.942238	0.208412	-0.302356	0.462985	-0.045475	1.61056	0.573297	0.694845	-0.009441	1.17378	-0.25566	1.27924	0.654226	1.01054	0.429946	1.63393	0.40943	0.834274	0.080929	0.315691	0.439387	0.460155	0.66509	-0.444964
13472012	AT4G22212	5.20205	5.51356	4.95077	5.55049	5.25149	5.30875	5.75586	5.04801	5.16914	4.04039	4.73462	5.46175	6.53539	5.74401	6.13194	5.25149	5.83797	6.79017	6.37751	5.67516	5.71347	6.23306	6.42795	6.64449	1.33334	0.230452	1.18117	-0.299002	0.586479	1.48142	0.553805	-0.465544	0.218372	-1.5101	-0.516869	0.153004	-0.157882	-0.068842	-0.418468	0.981568	0.589986	-0.145679	-0.711687	0.396702	-0.63684	2.49167	1.10685	-0.298683
13472475	AT4G23600	9.23374	9.33482	9.159	9.18859	9.95258	10.616	9.46925	9.32417	9.76189	10.2546	11.2318	11.5302	9.5277	9.36586	8.74003	8.45655	9.72019	10.4358	10.0731	9.62379	9.64138	10.2734	10.9964	11.3791	0.293968	0.031043	-0.418974	-0.73204	-0.232388	-0.18019	0.235516	-0.010651	0.602891	1.06601	1.27918	0.91418	0.545436	0.257925	0.901348	1.81688	1.27623	0.94331	0.30992	0.268576	0.298457	0.75087	-0.002952	0.02913
13473038	AT4G24570	8.82469	7.98965	9.17533	9.12482	7.17314	6.50665	8.5921	7.88055	7.66933	9.82399	6.39143	6.74168	9.2026	8.0755	9.07119	8.47122	7.11582	7.24191	8.96697	8.25982	7.07627	9.58162	6.99756	7.43199	0.377907	0.085853	-0.104142	-0.653595	-0.057318	0.73526	-0.232595	-0.109105	-1.50601	0.699172	-0.781705	0.235029	-0.23563	0.184318	-1.99492	1.1104	-0.118256	0.190082	-0.003035	0.293423	-0.488914	0.411231	0.663449	-0.044947
13475343	AT4G29780	5.19688	5.10325	5.65064	5.4802	4.23883	4.73068	5.19045	4.65994	4.86287	6.93076	4.80121	4.92065	6.02996	5.34648	5.89585	5.49939	5.41911	4.87966	5.51414	5.65673	4.62164	6.74408	5.30444	5.51326	0.833078	0.24323	0.245214	0.019187	1.18029	0.148978	-0.00643	-0.443305	-0.787768	1.45056	0.562383	0.189971	-0.515821	0.310254	-1.27422	1.2447	-0.114678	0.633606	-0.509391	0.753559	-0.486447	-0.205867	-0.677061	0.443635
13477518	AT4G34410	4.69054	4.42452	4.59288	4.96916	4.63333	4.36529	3.97163	4.55542	4.6417	6.02731	4.18383	3.97826	4.96618	4.67654	4.57938	4.34318	4.57534	4.64642	4.66921	4.67054	4.7641	5.80833	4.42483	4.61596	0.275642	0.252025	-0.013492	-0.625976	-0.057989	0.281134	-0.718903	0.130896	0.048823	1.05815	-0.449493	-0.38703	-0.29697	-0.006005	0.18472	1.46515	-0.150503	-0.03046	0.421933	-0.136901	0.135897	0.406998	0.29899	0.35657
13482365	AT4G08870	7.81614	7.24442	7.5401	6.42319	9.17816	9.69133	7.89516	7.23829	8.15186	8.97225	11.0115	11.3558	3.9612	4.06207	3.3707	3.3235	3.82761	3.33437	3.56031	4.12894	3.59872	4.09487	3.15347	3.56339	-3.85494	-3.18236	-4.1694	-3.09969	-5.35055	-6.35696	0.079025	-0.006136	0.611759	2.54906	1.83335	1.66445	-0.400889	0.066869	0.228023	0.771365	-0.674135	0.229022	-0.479914	0.073005	-0.383736	-1.7777	-2.50748	-1.43543
13483613	AT4G12470	10.7708	10.6241	9.59155	8.77356	7.83694	6.35905	10.691	10.7854	10.9494	9.63495	7.99275	6.4134	10.958	10.8006	9.19302	7.64746	9.08794	8.18101	11.0108	11.0132	9.45799	8.7626	8.39024	7.21376	0.18719	0.17649	-0.398539	-1.1261	1.251	1.82195	-0.07984	0.16127	1.35789	0.861385	0.155816	0.054351	0.0528	0.2126	0.264969	1.11514	-0.697699	-0.967248	0.13264	0.05133	-1.09292	0.253756	-0.853515	-1.0216
13485736	AT4G16930	3.55547	3.13853	3.50427	3.84555	3.28621	3.53304	3.64294	3.42138	2.83853	3.05458	3.00276	3.40377	3.50068	4.33027	3.35347	3.9415	3.67385	3.28663	3.18818	3.10935	3.48132	3.04123	3.64648	3.72231	-0.054783	1.19174	-0.150809	0.09595	0.387635	-0.246405	0.087472	0.282852	-0.665748	-0.790963	-0.283453	-0.129266	-0.312506	-1.22091	0.127855	-0.900261	-0.027366	0.435675	-0.399978	-1.50377	0.793603	-0.109298	0.256087	0.564941
13486087	AT4G17490	6.55338	6.54853	7.4284	6.28065	5.60554	4.5593	7.07092	6.22678	6.04606	7.49097	4.90031	4.85023	6.10749	6.6041	6.59952	5.05872	5.12796	5.60763	6.88781	6.86131	6.14631	6.93684	5.79255	5.90319	-0.445891	0.055566	-0.828875	-1.22193	-0.477584	1.04833	0.51754	-0.32175	-1.38233	1.21032	-0.705228	0.290934	0.78032	0.257218	-0.453213	1.87811	0.664595	0.295568	0.26278	0.578968	0.929119	0.667794	1.36982	0.004634
13492742	AT4G33050	6.46534	5.66045	5.7358	5.97912	5.75832	5.71876	6.57638	5.79903	6.33184	6.67065	6.13562	6.5258	6.8164	6.13135	6.46349	6.44789	6.32536	6.51057	7.30343	6.6435	6.16101	7.1844	6.7073	6.64681	0.351059	0.470895	0.727686	0.468774	0.56704	0.791806	0.11104	0.138573	0.596043	0.691534	0.377299	0.807041	0.487027	0.512156	-0.302472	0.736505	0.381939	0.136238	0.375987	0.373583	-0.898515	0.044971	0.00464	-0.670803
13493743	AT4G35180	6.91536	4.07415	4.33386	5.15595	3.99815	4.301	6.30488	4.81059	6.50795	6.48722	7.43116	7.72221	8.23467	7.37652	7.59681	7.6929	7.19232	7.76199	8.36081	8.6542	8.00315	8.95312	8.62873	8.3464	1.31931	3.30237	3.26295	2.53695	3.19417	3.46099	-0.610478	0.736438	2.1741	1.33127	3.433	3.42121	0.126139	1.27768	0.406344	1.26022	1.43641	0.584403	0.736617	0.54124	-1.76775	-0.07105	-1.99659	-2.83681
13494710	AT4G37290	5.27879	4.41853	4.67089	4.73684	4.80516	4.10494	5.88599	4.92788	5.34904	5.42294	5.19038	6.49861	5.35836	6.09941	5.29139	5.86279	5.06886	4.89217	6.97693	5.89095	4.80303	6.74605	5.30418	6.98833	0.079576	1.68088	0.620493	1.12595	0.263695	0.787225	0.607207	0.509348	0.678149	0.686099	0.385218	2.39366	1.61857	-0.208456	-0.488357	0.883257	0.235326	2.09616	1.01136	-0.717804	-1.16651	0.197158	-0.149892	-0.297502
13498037	AT5G05600	7.54392	7.2825	7.06614	6.63117	7.15055	6.44498	7.65443	7.82704	7.97536	8.11093	8.95585	9.45152	6.77606	6.47912	6.07553	6.13922	6.4094	6.77456	7.62826	7.07256	7.20289	8.0602	8.29645	8.64754	-0.767859	-0.803379	-0.990607	-0.491954	-0.741152	0.329584	0.110507	0.544534	0.909218	1.47976	1.8053	3.00654	0.852194	0.593435	1.12736	1.92098	1.88705	1.87298	0.741687	0.048901	0.218141	0.441216	0.081748	-1.13356
13498516	AT5G06870	7.59521	7.87432	7.94639	7.31581	8.56188	7.89694	7.74264	8.32003	8.26401	8.41037	9.06669	9.28489	7.54164	7.44075	7.70861	7.3049	8.14397	8.05033	8.00977	7.80867	7.90782	8.42089	8.77728	8.69125	-0.053572	-0.433565	-0.237787	-0.010909	-0.417904	0.153384	0.147425	0.445707	0.31762	1.09456	0.50481	1.38794	0.468124	0.367912	0.19922	1.11598	0.633312	0.640923	0.320699	-0.077795	-0.1184	0.021424	0.128502	-0.747022
13500911	AT5G13220	6.40216	5.85294	6.12518	6.2457	5.59637	5.38779	6.7022	6.40234	6.61501	7.23999	8.53575	9.35294	7.12069	5.98942	6.14789	6.61455	6.30077	6.70339	7.20375	6.24467	6.92552	7.77373	7.68203	8.58104	0.71853	0.136485	0.022715	0.368848	0.704398	1.3156	0.300036	0.549399	0.489837	0.994288	2.93937	3.96516	0.083054	0.255251	0.777625	1.15918	1.38126	1.87765	-0.216982	-0.294148	0.287788	0.16489	-1.55811	-2.08751
13500970	AT5G13320	7.01541	5.61098	5.24156	5.88988	7.10413	7.37591	6.86779	6.0913	6.80083	6.92899	8.73674	9.75019	8.96685	8.38662	7.61604	8.54159	8.71718	9.21059	9.65721	8.8651	8.00517	9.28196	9.32154	9.81251	1.95143	2.77564	2.37448	2.65171	1.61304	1.83468	-0.147627	0.480328	1.55926	1.03911	1.63261	2.37427	0.690363	0.478474	0.389133	0.740369	0.604359	0.60192	0.83799	-0.001854	-1.17013	-0.298737	-1.02825	-1.77235
13508159	AT5G38710	5.64822	5.37277	4.63395	4.82939	6.03027	6.37684	5.75332	5.94684	6.89888	5.72084	7.36542	8.12981	7.3722	6.96704	6.93706	6.61505	6.75248	6.32597	7.84495	7.812	7.80598	7.34891	7.06889	7.78105	1.72399	1.59426	2.3031	1.78567	0.722203	-0.050868	0.105105	0.574064	2.26492	0.891457	1.33515	1.75297	0.47275	0.844968	0.868929	0.733853	0.316412	1.45508	0.367645	0.270904	-1.396	-0.157604	-1.01874	-0.297892
13513848	AT5G52050	4.39252	3.95365	3.85925	4.75948	4.30344	4.53455	4.63748	4.32775	4.5691	5.84614	4.59206	5.27217	5.2379	4.28795	4.79172	4.77068	4.2492	4.90756	4.83731	4.94642	4.61275	5.44257	4.63031	4.91979	0.845381	0.334299	0.932468	0.011207	-0.054248	0.373007	0.244961	0.374101	0.709849	1.08666	0.288614	0.73762	-0.400585	0.658472	-0.178966	0.671892	0.381116	0.012235	-0.645546	0.284371	-0.888815	-0.41477	0.092502	-0.725385
13514125	AT5G52750	5.98318	5.43113	5.77161	5.25309	5.47227	5.54862	6.63605	5.61766	6.178	6.43729	6.07181	6.90589	6.26594	6.00718	6.40863	5.89169	6.26059	6.0795	6.74843	6.70851	5.92227	6.6721	5.63915	6.23497	0.282759	0.576048	0.637022	0.638592	0.788321	0.530878	0.652869	0.186535	0.406392	1.18419	0.599545	1.35727	0.482491	0.701333	-0.486352	0.780414	-0.621444	0.155468	-0.170378	0.514798	-0.892744	-0.40378	-1.22099	-1.2018
13517207	AT5G59820	6.43091	5.42136	6.28192	6.01243	4.72882	4.32232	6.72918	5.38988	5.89146	6.6256	5.60285	6.70603	7.48463	6.42818	6.94722	6.76558	5.82416	6.34704	8.16695	7.49052	6.43721	7.85915	6.69457	7.44047	1.05372	1.00682	0.665297	0.753155	1.09533	2.02473	0.298265	-0.031483	-0.390467	0.613172	0.874021	2.38371	0.682317	1.06234	-0.510013	1.09356	0.870415	1.09343	0.384052	1.09383	-0.119546	0.480393	-0.003606	-1.29029
13520416	AT5G67080	5.06932	4.0946	4.28486	4.74918	3.58548	3.79012	5.07387	5.39565	4.40066	5.73022	5.61159	6.68099	5.93936	4.70336	4.25257	4.59549	4.21118	4.5928	6.21233	5.48182	5.15509	6.83894	5.3411	6.14304	0.870039	0.608762	-0.032294	-0.153693	0.625697	0.802677	0.004552	1.30105	0.115804	0.981033	2.0261	2.89087	0.272969	0.778458	0.902521	2.24345	1.12991	1.55025	0.268417	-0.522589	0.786717	1.26242	-0.89619	-1.34062
13523723	AT5G08790	9.56856	8.92707	9.33712	8.9176	8.6571	8.72601	9.75135	9.22531	9.76361	9.50915	9.40961	9.56189	9.98954	9.68368	9.91887	9.31913	9.41548	9.35891	10.5869	10.335	9.98018	10.2556	9.6884	9.77527	0.420972	0.756618	0.581754	0.401527	0.758374	0.632893	0.182788	0.298241	0.426488	0.591552	0.752507	0.835875	0.597414	0.651276	0.061312	0.936464	0.272919	0.416368	0.414626	0.353035	-0.365176	0.344912	-0.479588	-0.419507
13530607	AT5G24780	6.05524	5.28761	5.4586	5.03901	5.729	5.6878	6.0541	5.69126	6.00967	5.67068	8.62335	10.1824	4.62181	4.40126	3.80358	4.3475	5.5582	4.60807	4.18732	3.80358	5.20282	5.73304	7.14469	8.73624	-1.43344	-0.886349	-1.65502	-0.691504	-0.170807	-1.07973	-0.001148	0.40365	0.551068	0.631675	2.89434	4.49456	-0.434485	-0.597681	1.39924	1.38554	1.58649	4.12817	-0.433337	-1.00133	0.848175	0.753863	-1.30786	-0.366393
13531409	AT5G27060	4.9995	5.72039	6.04475	5.54088	5.5389	5.29661	4.93832	6.15341	5.67092	6.264	8.25427	8.86168	3.84745	4.57676	4.22796	4.09048	4.38378	5.82683	5.60754	5.18878	4.31533	6.17873	6.28563	7.3013	-1.15205	-1.14363	-1.81679	-1.4504	-1.15513	0.530213	-0.06118	0.433024	-0.373835	0.723125	2.71537	3.56507	1.76009	0.612027	0.087367	2.08826	1.90185	1.47448	1.82127	0.179003	0.461202	1.36513	-0.813518	-2.09059
13534610	AT5G42650	7.23683	7.43907	7.55277	7.16973	7.78046	7.96296	7.25954	7.7811	7.77933	7.86252	8.7751	9.34878	6.69796	6.5894	6.62417	6.37346	7.33336	7.45312	7.11735	6.6875	6.53927	7.57514	7.9395	8.15114	-0.538863	-0.849673	-0.9286	-0.796276	-0.447099	-0.509846	0.022717	0.342022	0.226563	0.692791	0.994637	1.38582	0.41939	0.098096	-0.0849	1.20168	0.606137	0.698023	0.396673	-0.243926	-0.311463	0.508889	-0.3885	-0.687797
13535388	AT5G44420	6.71151	6.61815	6.15911	5.39257	7.56139	6.50938	6.36081	7.0462	8.38505	7.63242	9.31871	8.82622	4.3609	4.56621	3.6128	2.87226	3.93596	4.63471	6.01535	6.21688	5.64102	4.49217	5.21302	4.71622	-2.35061	-2.05194	-2.54631	-2.52031	-3.62543	-1.87466	-0.350698	0.428057	2.22594	2.23985	1.75732	2.31684	1.65445	1.65067	2.02822	1.61991	1.27706	0.081512	2.00515	1.22261	-0.197716	-0.619944	-0.480258	-2.23533
13536497	AT5G47220	8.83536	8.96559	9.11622	8.20833	7.89435	7.77856	9.12982	9.3917	9.56279	9.02498	7.41956	7.34535	9.76102	9.83782	9.92561	9.28497	8.57079	9.32353	10.2991	10.2423	10.049	9.94563	8.80712	9.18121	0.925662	0.872236	0.809389	1.07664	0.676447	1.54497	0.294462	0.426118	0.446566	0.816648	-0.474784	-0.433205	0.538119	0.404499	0.123397	0.660656	0.236327	-0.142316	0.243657	-0.021619	-0.323169	-0.155992	0.711111	0.290889
13336448	AT1G06180	5.4522	4.94618	5.9241	5.56135	5.33001	5.58878	5.51119	5.50571	6.52373	5.88976	6.12693	7.01644	5.4522	5.66048	6.1639	6.02207	5.39808	6.18874	6.02152	6.53556	6.90661	6.40764	6.35655	7.12421	0	0.714297	0.239803	0.460714	0.068071	0.599966	0.058989	0.559529	0.599629	0.328403	0.796919	1.42766	0.569314	0.875085	0.742707	0.385576	0.958465	0.935467	0.510325	0.315556	0.143078	0.057173	0.161546	-0.492193
13341533	AT1G17750	4.583	4.64084	4.58619	4.82625	4.64906	5.12222	4.57651	4.50843	4.95329	5.08463	5.81168	6.36404	4.75159	4.51956	4.64994	5.28784	4.85384	5.41775	4.54193	4.76437	5.12458	5.86387	5.42212	6.07592	0.168595	-0.121278	0.063748	0.461589	0.204788	0.295527	-0.006488	-0.132411	0.367099	0.258384	1.16262	1.24182	-0.209658	0.244805	0.474642	0.576028	0.56828	0.658177	-0.20317	0.377216	0.107543	0.317644	-0.594342	-0.58364
13354462	AT1G62660	7.28374	7.20369	7.24128	8.19768	8.60763	8.64632	6.84794	7.19367	7.31138	8.52959	9.28389	9.9609	7.07987	6.49442	6.75473	7.47286	7.49933	7.69473	6.48995	6.34842	6.74047	7.63959	8.05797	9.00431	-0.203864	-0.709269	-0.48655	-0.724823	-1.1083	-0.951593	-0.435798	-0.010019	0.070095	0.331907	0.676266	1.31458	-0.589927	-0.145998	-0.014258	0.166734	0.558643	1.30958	-0.154129	-0.135979	-0.084353	-0.165173	-0.117623	-0.004999
13404541	AT2G43510	8.45913	8.67573	9.05497	8.7026	9.11158	8.63424	8.37822	9.13927	9.47012	9.04991	9.92911	10.9208	7.83731	8.47444	8.86403	8.63047	8.90445	8.85055	8.5213	8.90707	9.34778	9.23219	9.94339	11.0354	-0.621816	-0.201286	-0.190938	-0.07213	-0.207134	0.21631	-0.080913	0.463537	0.415148	0.347315	0.817527	2.28655	0.683985	0.432626	0.48375	0.601728	1.03895	2.18481	0.764898	-0.030911	0.068602	0.254413	0.221418	-0.10174
13500977	AT5G13330	7.26197	7.25345	7.37362	6.91356	6.50772	6.75251	7.85718	8.14197	8.27054	7.34412	7.71259	9.31637	8.262	8.20279	8.41665	8.36952	7.47904	7.64757	9.00921	9.31822	9.22689	8.94889	8.454	9.63436	1.00003	0.949334	1.04303	1.45596	0.971328	0.89506	0.595212	0.888519	0.896925	0.430555	1.20487	2.56386	0.747208	1.11543	0.810243	0.579364	0.974954	1.98679	0.151996	0.226912	-0.086682	0.148809	-0.229921	-0.577068
13530600	AT5G24770	4.11243	3.39146	3.62785	3.29077	4.3556	4.49845	3.70561	3.60958	3.59536	3.6429	7.51932	8.58965	3.49378	3.5045	3.21708	3.78214	3.25833	3.46111	3.64283	3.30091	3.28304	3.42128	4.7022	4.49109	-0.618646	0.113039	-0.410775	0.491369	-1.09727	-1.03734	-0.406819	0.218114	-0.032489	0.352123	3.16372	4.0912	0.149045	-0.203588	0.065958	-0.360865	1.44387	1.02998	0.555864	-0.421702	0.098447	-0.712988	-1.71985	-3.06122
[truncated: 26 more columns]

## Sheet: 24h
Affymetrix ST 1.0 Probe	New locus	2h Col-0 Mock	4h Col-0 Mock	8h Col-0 Mock	16h Col-0 Mock	24h Col-0 Mock	48h Col-0 Mock	2h Col-0 Pst	4h Col-0 Pst	8h Col-0 Pst	16h Col-0 Pst	24h Col-0 Pst	48h Col-0 Pst	2h C24 Mock	4h C24 Mock	8h C24 Mock	16h C24 Mock	24h C24 Mock	48h C24 Mock	2h C24 Pst	4h C24 Pst	8h C24 Pst	16h C24 Pst	24h C24 Pst	48h C24 Pst	2h C24 Mock - Col-0 Mock	4h C24 Mock - Col-0 Mock	8h C24 Mock - Col-0 Mock	16h C24 Mock - Col-0 Mock	24h C24 Mock - Col-0 Mock	48h C24 Mock - Col-0 Mock	2h Col-0 Pst - Mock	4h Col-0 Pst - Mock	8h Col-0 Pst - Mock	16h Col-0 Pst - Mock	24h Col-0 Pst - Mock	48h Col-0 Pst - Mock	2h C24 Pst - Mock	4h C24 Pst - Mock	8h C24 Pst - Mock	16h C24 Pst - Mock	24h C24 Pst - Mock	48h C24 Pst - Mock	2h C24 Pst - Col-0 Pst (each Mock subtracted)	4h C24 Pst - Col-0 Pst (each Mock subtracted)	8h C24 Pst - Col-0 Pst (each Mock subtracted)	16h C24 Pst - Col-0 Pst (each Mock subtracted)	24h C24 Pst - Col-0 Pst (each Mock subtracted)	48h C24 Pst - Col-0 Pst (each Mock subtracted)
13336414	AT1G06080	6.17388	8.51971	8.72407	6.88471	7.98248	7.42892	6.66573	8.26845	7.72949	6.16157	6.93562	4.84736	4.38661	7.24416	7.67274	4.96948	7.14033	6.65907	4.73364	6.88911	7.24464	4.81602	5.91093	5.57784	-1.78727	-1.27555	-1.05133	-1.91523	-0.842147	-0.769858	0.491854	-0.251259	-0.994583	-0.723138	-1.04686	-2.58157	0.347035	-0.355054	-0.428102	-0.153457	-1.2294	-1.08123	-0.144819	-0.103795	0.566481	0.569681	-0.182541	1.50034
13336448	AT1G06180	5.4522	4.94618	5.9241	5.56135	5.33001	5.58878	5.51119	5.50571	6.52373	5.88976	6.12693	7.01644	5.4522	5.66048	6.1639	6.02207	5.39808	6.18874	6.02152	6.53556	6.90661	6.40764	6.35655	7.12421	0	0.714297	0.239803	0.460714	0.068071	0.599966	0.058989	0.559529	0.599629	0.328403	0.796919	1.42766	0.569314	0.875085	0.742707	0.385576	0.958465	0.935467	0.510325	0.315556	0.143078	0.057173	0.161546	-0.492193
13336657	AT1G06620	5.88209	5.0126	5.68784	5.27649	5.33293	5.60389	6.47507	5.47049	6.33018	6.64029	7.83372	8.61519	6.68103	6.12808	6.41689	6.06802	6.74413	7.28069	7.15327	6.65774	7.13875	7.24524	8.15635	8.72324	0.798941	1.11548	0.729056	0.79153	1.4112	1.6768	0.592989	0.457884	0.642344	1.36381	2.50079	3.01131	0.472249	0.529662	0.721859	1.17723	1.41223	1.44255	-0.12074	0.071778	0.079515	-0.186582	-1.08856	-1.56876
13338744	AT1G11260	10.5056	10.4271	10.1377	9.82275	9.98227	8.4122	10.7157	10.5958	10.091	9.82989	9.1679	8.48978	10.293	10.3716	10.4327	9.91765	9.70925	8.70712	10.335	10.4878	10.1738	10.0543	9.00349	8.08034	-0.21264	-0.05555	0.29491	0.094904	-0.273015	0.294923	0.2101	0.16872	-0.04676	0.007134	-0.814366	0.077581	0.04196	0.11627	-0.25887	0.136695	-0.705761	-0.626783	-0.16814	-0.05245	-0.21211	0.129561	0.108605	-0.704364
13342166	AT1G19180	9.59001	9.22624	9.65319	8.89587	8.81675	8.21361	9.73565	9.86027	9.97983	10.0344	10.1861	10.9581	10.1022	9.60848	9.44247	9.09279	8.61584	9.23109	10.5319	10.1657	9.95161	10.3377	9.92053	10.5076	0.512236	0.382236	-0.210722	0.196922	-0.20091	1.01749	0.145637	0.634027	0.326642	1.13851	1.36931	2.74449	0.42969	0.557191	0.509138	1.24486	1.30469	1.27645	0.284053	-0.076836	0.182496	0.106348	-0.064616	-1.46804
13343195	AT1G21910	9.71611	9.13883	8.98402	8.94984	7.70445	6.01389	9.59547	8.86514	8.64484	9.16242	6.25922	5.53324	9.50874	9.08762	8.32997	7.87616	7.05718	6.0528	9.20592	8.89503	7.63221	8.26262	6.37774	5.82702	-0.207365	-0.05121	-0.654053	-1.07368	-0.647269	0.038902	-0.120643	-0.273693	-0.33918	0.212575	-1.44523	-0.480649	-0.302822	-0.192597	-0.697762	0.386465	-0.67944	-0.225774	-0.182179	0.081096	-0.358582	0.17389	0.76579	0.254875
13346118	AT1G30135	3.11443	2.82293	3.18435	3.11998	3.30126	2.70765	3.37394	3.28509	3.18312	4.09314	4.1991	5.18876	3.12802	3.40391	3.24107	3.29174	3.40734	3.34726	4.04106	3.52572	3.22517	4.16635	4.36564	4.84095	0.013597	0.580983	0.056725	0.171757	0.106077	0.639606	0.259519	0.46216	-0.001231	0.973159	0.897838	2.4811	0.913042	0.121807	-0.015908	0.874612	0.958299	1.49369	0.653523	-0.340353	-0.014677	-0.098547	0.060461	-0.987419
13347601	AT1G33960	8.27599	7.80166	6.84637	6.84139	7.42206	7.38602	7.93442	8.03697	6.9796	7.0472	9.90564	11.0726	7.15741	6.65107	6.4581	7.01493	6.80761	8.09563	7.49113	6.8464	6.24904	7.09783	8.75473	9.5967	-1.11858	-1.15059	-0.38827	0.173535	-0.614443	0.709616	-0.341565	0.235305	0.133235	0.205811	2.48359	3.68662	0.333719	0.195322	-0.209055	0.082899	1.94711	1.50107	0.675284	-0.039983	-0.34229	-0.122912	-0.536475	-2.18555
13348604	AT1G43160	6.81954	6.02274	5.05857	4.81458	4.81972	4.57116	6.61807	5.82908	5.15854	5.11646	6.44692	8.03133	5.22318	4.71055	4.62913	5.06003	4.94035	5.15534	6.31558	5.05081	5.52428	5.73938	5.68539	6.74172	-1.59636	-1.3122	-0.429442	0.245452	0.120635	0.584187	-0.201475	-0.193666	0.099969	0.301878	1.6272	3.46017	1.0924	0.340265	0.895147	0.679342	0.745035	1.58638	1.29387	0.533931	0.795178	0.377464	-0.882168	-1.87379
13351018	AT1G51780	4.78971	5.02805	5.35332	4.6878	4.90393	4.99045	4.88964	4.50041	4.93424	5.81904	8.10831	9.41625	5.78729	4.59982	4.49637	4.32602	4.56184	5.5756	6.22125	4.74909	5.76237	6.45645	7.11489	9.42887	0.997581	-0.428226	-0.856948	-0.361786	-0.342088	0.585151	0.099925	-0.527639	-0.419075	1.13123	3.20438	4.4258	0.433959	0.149263	1.266	2.13043	2.55304	3.85327	0.334034	0.676902	1.68507	0.999196	-0.651333	-0.572533
13351211	AT1G52410	8.74908	7.95653	8.58326	8.48692	8.72545	9.19457	8.64099	7.88507	8.30809	8.93219	9.82665	10.2346	7.16845	7.1072	7.13683	7.1306	8.07099	8.61167	7.0603	6.96537	7.20336	8.71174	9.12116	9.97968	-1.58063	-0.849325	-1.44643	-1.35632	-0.654467	-0.582903	-0.108088	-0.071452	-0.27517	0.445277	1.1012	1.04002	-0.108155	-0.141827	0.066529	1.58114	1.05018	1.36802	-6.7e-05	-0.070375	0.341699	1.13586	-0.051021	0.327998
13353943	AT1G61120	5.41707	5.86437	6.28148	5.98384	6.35535	5.03275	5.67034	6.77993	6.73407	7.51219	9.21101	10.2522	5.15164	4.57048	5.09219	5.06371	5.05937	6.16462	6.21472	5.73319	5.95349	7.62737	7.02013	7.4141	-0.26543	-1.29389	-1.18929	-0.920135	-1.29598	1.13188	0.253272	0.915556	0.452589	1.52835	2.85567	5.21948	1.06308	1.16271	0.861304	2.56366	1.96076	1.24948	0.80981	0.247156	0.408715	1.03532	-0.894912	-3.97
13354117	AT1G61610	6.0851	6.66069	6.58055	6.18374	6.78113	7.25291	6.24109	6.44648	6.55794	6.82162	8.77739	9.55193	6.7649	6.5009	6.46422	6.2205	6.87978	7.29684	7.53332	6.4315	6.36556	6.62682	8.08439	9.60591	0.679803	-0.159788	-0.116323	0.036763	0.098649	0.043927	0.155995	-0.214211	-0.02261	0.637875	1.99625	2.29901	0.768425	-0.0694	-0.098665	0.406315	1.20461	2.30906	0.61243	0.144811	-0.076055	-0.23156	-0.791645	0.010051
13354180	AT1G61800	6.99134	6.27948	5.56	5.18392	6.18375	6.45961	7.6425	7.61838	6.89834	6.03339	7.85495	9.21194	9.08917	8.13059	7.14378	7.78859	7.37824	8.5311	9.87295	9.22416	7.99319	8.41109	8.68196	9.80399	2.09783	1.85111	1.58378	2.60467	1.1945	2.07149	0.651164	1.3389	1.33835	0.849474	1.6712	2.75233	0.783785	1.09357	0.849415	0.622505	1.30371	1.27289	0.132621	-0.245333	-0.488934	-0.226969	-0.367492	-1.47944
13355772	AT1G66370	4.61259	4.52401	5.33379	5.5813	5.98688	5.84922	4.105	4.94321	5.99548	6.53267	7.64048	8.84603	5.27682	5.28937	5.22933	4.74808	5.6238	6.10846	4.91858	5.28475	5.44357	6.43221	6.92779	8.08474	0.66423	0.765368	-0.104456	-0.833221	-0.36308	0.259241	-0.50759	0.419208	0.66169	0.951369	1.6536	2.99681	-0.358241	-0.004621	0.21424	1.68414	1.30399	1.97629	0.149349	-0.423829	-0.44745	0.732767	-0.349607	-1.02052
13355836	AT1G66550	3.50789	3.56828	3.39244	3.49071	3.47914	3.83558	3.65955	3.6541	3.51254	3.48658	7.06442	6.36924	3.69255	3.717	4.01937	3.89329	3.5975	5.16472	3.8756	4.14442	4.41153	3.55857	5.45043	5.40556	0.184661	0.148721	0.626926	0.402574	0.118364	1.32913	0.151657	0.085814	0.120097	-0.004134	3.58528	2.53366	0.183046	0.427418	0.392155	-0.334718	1.85293	0.240842	0.031389	0.341604	0.272058	-0.330584	-1.73235	-2.29282
13362363	AT1G02450	5.4082	5.21163	5.355	4.64921	4.58397	5.66521	6.10001	4.63978	6.81804	4.07332	7.27857	8.03204	6.31025	7.77401	8.81606	7.79013	7.67711	7.89682	7.00381	8.73797	8.56144	8.01956	8.57852	8.10822	0.902049	2.56238	3.46106	3.14092	3.09314	2.23161	0.6918	-0.571854	1.46304	-0.575887	2.6946	2.36684	0.693554	0.963958	-0.254623	0.229432	0.901409	0.211401	0.001754	1.53581	-1.71766	0.805319	-1.79319	-2.15544
13363506	AT1G04980	7.72916	8.48239	8.86053	6.5382	7.33441	7.74113	7.92579	8.27345	9.06344	6.5164	8.2887	9.64813	8.21984	8.60372	8.97097	6.80895	8.09026	8.86701	8.87049	8.48633	9.1499	6.5812	9.03343	9.26655	0.490677	0.121336	0.110441	0.270751	0.755843	1.12588	0.196627	-0.208937	0.202907	-0.021798	0.954282	1.907	0.650655	-0.117395	0.178928	-0.227748	0.943178	0.399542	0.454028	0.091542	-0.023979	-0.20595	-0.011104	-1.50746
13367421	AT1G13340	6.10433	6.42281	6.12786	6.27994	6.48061	6.03096	6.40529	6.43456	6.84067	6.50554	7.41242	8.71758	7.9126	7.52097	7.62008	8.07536	7.85619	8.10573	8.78181	7.92948	7.52701	8.29621	8.53357	9.10594	1.80828	1.09816	1.49222	1.79542	1.37558	2.07477	0.300964	0.011748	0.712809	0.225601	0.93181	2.68662	0.869205	0.408501	-0.093063	0.220854	0.677378	1.00021	0.568241	0.396753	-0.805872	-0.004747	-0.254432	-1.68641
13368466	AT1G15520	7.00984	6.21121	5.99746	6.20161	5.98167	6.07115	8.18219	7.55926	6.94442	6.52004	8.817	10.3656	9.78294	8.60355	7.63012	9.20808	8.37528	9.57958	10.6889	9.79143	8.8253	9.85919	9.84395	11.0452	2.7731	2.39234	1.63266	3.00647	2.39362	3.50843	1.17234	1.34805	0.946962	0.318433	2.83533	4.29444	0.905916	1.18788	1.19519	0.651111	1.46867	1.4656	-0.266429	-0.160166	0.248225	0.332678	-1.36666	-2.82884
13369126	AT1G17380	5.81926	5.46615	5.89924	6.18544	6.05898	5.62242	5.8608	5.98378	6.39344	8.45739	8.97807	9.45973	6.18478	5.53848	5.29887	6.0614	5.77982	6.39296	6.19964	5.73572	5.86193	8.69275	8.21023	8.75329	0.365511	0.072333	-0.600368	-0.124045	-0.279162	0.770542	0.041536	0.517627	0.4942	2.27195	2.91909	3.8373	0.014868	0.197236	0.563059	2.63135	2.43041	2.36032	-0.026668	-0.320391	0.068859	0.359396	-0.488677	-1.47698
13369973	AT1G19250	4.66197	5.6159	4.85433	5.22194	5.17384	4.60368	5.44096	6.09611	6.90316	4.92452	8.35194	9.94892	7.9173	8.18992	7.50605	8.12506	7.64038	9.26207	8.9897	8.9934	8.62522	9.27121	9.79995	10.603	3.25532	2.57402	2.65172	2.90313	2.46654	4.65838	0.778983	0.480211	2.04883	-0.297423	3.1781	5.34523	1.0724	0.803485	1.11917	1.14614	2.15957	1.34096	0.29342	0.323274	-0.929664	1.44356	-1.01853	-4.00427
13370096	AT1G19640	6.71334	4.52411	5.13556	5.99902	7.03264	7.46976	6.3879	5.33662	5.02707	7.55247	8.73747	9.20491	6.04362	4.60259	4.25503	4.83625	5.97865	6.52555	6.44136	4.52758	5.05996	5.9446	7.70731	8.3677	-0.669719	0.078481	-0.880526	-1.16276	-1.05399	-0.944215	-0.325443	0.812513	-0.108494	1.55345	1.70483	1.73514	0.397739	-0.075014	0.804924	1.10835	1.72865	1.84215	0.723182	-0.887527	0.913418	-0.445103	0.023822	0.107005
13370131	AT1G19670	9.6782	9.35628	10.1414	9.8728	10.631	10.4276	9.69025	9.76104	10.7675	11.1301	11.4249	11.5671	9.23005	9.39479	9.3281	9.77745	10.4536	10.6161	9.82635	9.46673	10.3003	10.9919	11.2751	11.2973	-0.448155	0.038517	-0.813301	-0.095355	-0.17738	0.1886	0.012048	0.40476	0.62611	1.2573	0.79391	1.13956	0.596303	0.071939	0.972191	1.21446	0.82155	0.6811	0.584255	-0.332821	0.346081	-0.042835	0.02764	-0.45846
13372229	AT1G25220	3.56381	3.8039	3.56718	3.99546	3.34037	3.40989	3.86204	3.61716	3.57353	4.79436	4.82235	4.99829	3.06444	3.66765	3.15013	3.58813	2.75593	4.12843	4.03041	4.53219	4.1132	3.41989	3.88837	3.45407	-0.499373	-0.136251	-0.417054	-0.407339	-0.584437	0.718535	0.298221	-0.186739	0.00635	0.798899	1.48199	1.5884	0.965968	0.864543	0.963072	-0.168237	1.13244	-0.674352	0.667747	1.05128	0.956722	-0.967136	-0.349549	-2.26275
13373203	AT1G28190	8.19947	8.11791	7.98905	7.49035	6.77565	6.72867	8.6759	8.45958	8.14854	7.88473	7.5589	7.95782	8.83564	8.04653	7.94031	8.01279	7.2738	7.63569	9.59066	9.07825	8.1798	8.78717	8.14712	8.58971	0.636174	-0.071381	-0.048744	0.522435	0.498151	0.907024	0.476432	0.341669	0.159483	0.394379	0.783256	1.22915	0.755011	1.03172	0.239493	0.774386	0.873323	0.95402	0.278579	0.69005	0.08001	0.380007	0.090067	-0.275133
13373342	AT1G28480	3.72133	3.75615	3.89836	3.63578	4.16791	4.24476	3.63325	3.76333	5.60147	5.39449	7.07765	7.52182	5.00826	5.75002	6.34711	6.15459	6.10188	6.23863	5.99537	6.36299	6.66352	7.00085	7.14787	7.03468	1.28694	1.99387	2.44875	2.51881	1.93397	1.99386	-0.088073	0.007187	1.70311	1.75871	2.90974	3.27706	0.987106	0.612973	0.316418	0.846262	1.04599	0.796054	1.07518	0.605786	-1.38669	-0.912446	-1.86375	-2.48101
13374940	AT1G32640	7.07643	7.22022	7.6421	6.85489	7.39335	7.62014	7.04598	7.37506	8.00885	8.0458	8.64913	9.14503	6.86668	6.96987	7.58981	7.21782	7.72379	8.02017	7.65723	7.75219	7.77994	8.34889	8.65494	9.00362	-0.209745	-0.25035	-0.052293	0.362921	0.330439	0.400029	-0.030445	0.154847	0.366747	1.1909	1.25578	1.52489	0.790544	0.78232	0.190136	1.13107	0.931148	0.983451	0.820989	0.627473	-0.176611	-0.059832	-0.324637	-0.541439
13376292	AT1G44350	7.37309	7.85937	8.08784	7.41586	7.79229	7.32351	7.57691	7.86296	8.13289	8.17624	9.13611	9.76382	7.12172	7.48082	7.87917	7.1756	7.10158	7.37924	7.17694	7.39923	7.57883	8.08942	8.38337	9.25017	-0.251372	-0.378541	-0.20867	-0.240258	-0.690707	0.055734	0.203823	0.003593	0.04505	0.760385	1.34382	2.44032	0.055225	-0.08159	-0.300348	0.913821	1.28178	1.87093	-0.148598	-0.085183	-0.345398	0.153436	-0.062038	-0.569386
13378490	AT1G52030	7.51744	6.54781	7.16398	7.0874	7.65215	7.16849	7.3986	6.70051	6.93598	7.58686	8.98786	9.232	6.1452	5.68372	5.70664	5.8108	6.90383	6.66313	5.77011	5.47985	5.82256	7.47394	7.98398	8.33863	-1.37224	-0.864084	-1.45734	-1.2766	-0.748319	-0.505352	-0.118836	0.152702	-0.228006	0.499459	1.33572	2.06352	-0.375087	-0.203874	0.115911	1.66314	1.08015	1.6755	-0.256251	-0.356576	0.343917	1.16368	-0.255567	-0.38802
13378498	AT1G52040	8.15758	7.25404	8.04563	7.92374	8.92558	9.59188	8.46589	7.0818	7.91731	8.69175	10.0478	10.8437	4.64675	4.31245	4.47085	4.41754	4.72517	5.79322	4.52795	4.33728	3.94733	6.10548	6.88022	9.60058	-3.51082	-2.94159	-3.57478	-3.50619	-4.20041	-3.79866	0.308309	-0.172236	-0.128322	0.76801	1.12219	1.25184	-0.118801	0.024831	-0.523516	1.68794	2.15505	3.80735	-0.42711	0.197067	-0.395194	0.91993	1.03286	2.55551
13378857	AT1G52890	5.79756	6.25838	6.59356	5.18463	5.91861	6.7142	6.63446	6.72369	6.54521	5.92272	7.34782	9.55929	6.01731	6.79168	7.16981	5.18879	5.88921	6.94187	7.65754	7.59228	7.25324	7.14661	7.12512	9.54218	0.219743	0.5333	0.576254	0.004164	-0.029409	0.227669	0.836894	0.465306	-0.048349	0.738095	1.4292	2.84509	1.64024	0.8006	0.083431	1.95782	1.23592	2.60031	0.803343	0.335294	0.13178	1.21973	-0.193286	-0.244774
13378862	AT1G52900	3.81711	3.62192	3.02584	3.21681	3.34899	3.6463	3.70563	3.52767	3.43384	3.32991	4.17344	6.26538	3.98166	3.77791	3.49977	3.84657	3.31494	4.1604	4.16096	3.98225	3.37751	3.76827	5.12193	5.86095	0.164549	0.155987	0.473931	0.629755	-0.03405	0.514107	-0.111488	-0.094252	0.408008	0.1131	0.824443	2.61908	0.179296	0.204343	-0.122262	-0.078292	1.80699	1.70054	0.290784	0.298595	-0.53027	-0.191392	0.982543	-0.918535
13380490	AT1G56650	4.97189	5.42572	4.92458	5.08601	7.4201	9.17811	5.00281	5.13409	5.21617	5.07871	9.21731	10.3987	4.12398	4.64739	4.53372	4.98095	5.30195	5.58831	4.42271	4.61517	4.44447	5.04996	6.08625	5.87641	-0.847915	-0.77833	-0.390864	-0.105058	-2.11815	-3.5898	0.030913	-0.291629	0.291589	-0.007301	1.79721	1.22062	0.298735	-0.03222	-0.089248	0.069011	0.784296	0.2881	0.267822	0.259409	-0.380837	0.076312	-1.01291	-0.932519
13383656	AT1G65690	6.44412	5.82666	5.65905	5.60338	6.04523	6.2611	6.52581	6.64637	7.13779	6.30872	6.81929	7.84025	7.26425	7.38101	7.35241	6.92406	7.36785	7.80936	8.07739	8.04496	7.24096	7.46469	8.09703	8.82428	0.82013	1.55435	1.69336	1.32068	1.32262	1.54826	0.081689	0.819712	1.47874	0.705345	0.77406	1.57915	0.813141	0.663956	-0.111457	0.540634	0.729186	1.01492	0.731452	-0.155756	-1.5902	-0.164711	-0.044874	-0.564223
13389720	AT1G79680	6.03665	5.70313	5.75156	5.28286	5.02983	4.63033	6.91205	6.65659	6.32501	6.29187	6.28895	7.51993	6.97499	6.60754	6.21665	6.40218	5.54056	6.05757	7.72416	6.93295	6.64316	7.4177	6.22719	7.394	0.938339	0.904409	0.465089	1.11933	0.510727	1.42725	0.8754	0.953467	0.573448	1.00901	1.25912	2.8896	0.749173	0.325416	0.426506	1.01551	0.686633	1.33642	-0.126227	-0.628051	-0.146942	0.0065	-0.572486	-1.55318
13392784	AT2G13810	4.96739	4.12887	4.0739	3.72885	3.81932	4.08502	4.81897	4.37141	6.19606	3.62824	7.01314	9.40425	6.72045	7.62293	6.33659	6.8485	7.28668	9.52737	8.26456	8.50676	7.5627	8.02012	9.40242	10.7758	1.75306	3.49406	2.26269	3.11965	3.46736	5.44235	-0.148422	0.242546	2.12217	-0.100611	3.19382	5.31923	1.54411	0.883832	1.22611	1.17162	2.11574	1.24845	1.69253	0.641286	-0.896058	1.27223	-1.07808	-4.07077
13395851	AT2G22330	7.95685	7.60273	8.37202	8.56942	8.53041	8.86988	7.91212	8.18672	8.64658	9.06954	9.4263	9.48877	8.10253	7.93536	8.35382	8.30998	8.14178	8.30362	8.53234	8.37224	8.57857	9.07231	8.91671	9.22829	0.145684	0.332627	-0.018201	-0.259433	-0.388635	-0.566265	-0.044728	0.583986	0.274566	0.500119	0.895892	0.618883	0.429803	0.436878	0.224758	0.762321	0.774935	0.924672	0.474531	-0.147108	-0.049808	0.262202	-0.120957	0.305789
13397254	AT2G26020	8.8274	7.31996	6.91518	6.37391	8.55456	6.30577	8.73878	8.6759	8.55204	7.96562	9.38522	7.8074	6.48104	5.07971	4.5015	4.98492	6.04615	5.86	8.10923	7.34063	6.72055	6.57144	7.41871	6.24118	-2.34635	-2.24025	-2.41368	-1.38899	-2.50841	-0.445766	-0.088616	1.35594	1.63686	1.59171	0.830661	1.50164	1.62819	2.26092	2.21904	1.58652	1.37255	0.381175	1.7168	0.904986	0.582181	-0.00519	0.541892	-1.12046
13398584	AT2G29350	3.40038	3.2165	3.37649	2.80613	3.22269	4.2146	3.81535	3.52597	4.62599	2.91466	5.00332	8.02586	4.98662	4.47277	5.00207	5.3879	5.57923	7.0805	6.2676	5.81658	5.55368	5.83222	7.14735	8.92486	1.58624	1.25628	1.62558	2.58178	2.35654	2.8659	0.414965	0.309469	1.2495	0.108537	1.78063	3.81125	1.28097	1.34381	0.551601	0.444316	1.56812	1.84436	0.86601	1.03434	-0.697895	0.335779	-0.21251	-1.96689
13400703	AT2G34600	4.93476	5.24648	4.82805	4.81892	4.93179	4.07982	5.19772	5.21879	5.24093	5.59427	5.70262	6.13966	4.95416	5.09832	4.80411	5.12569	4.37516	4.85705	5.16935	4.55028	5.36176	5.88469	5.61767	5.92203	0.019406	-0.148158	-0.023934	0.306772	-0.55663	0.777236	0.262958	-0.027688	0.412883	0.775344	0.770831	2.05984	0.215189	-0.548046	0.55765	0.758995	1.24251	1.06498	-0.047769	-0.520358	0.144767	-0.016349	0.471679	-0.994859
13400810	AT2G34810	8.27139	8.3526	8.73844	8.426	9.20012	9.12156	8.31996	8.25571	9.062	8.54807	10.1144	10.9191	8.13306	8.7463	8.77645	7.92295	8.77732	9.48471	8.37327	8.61593	9.22164	8.7283	10.1708	10.9005	-0.138329	0.393699	0.038011	-0.503057	-0.422803	0.363152	0.048574	-0.09689	0.323556	0.122068	0.914277	1.79752	0.240213	-0.130373	0.445184	0.805355	1.39352	1.41582	0.191639	-0.033483	0.121628	0.683287	0.479243	-0.381702
13401341	AT2G35980	6.32216	5.61547	4.92994	5.20055	5.0075	4.28503	7.3672	6.51398	7.04648	6.0586	6.16193	7.46484	8.96099	7.46699	6.86702	8.01273	7.17554	8.07783	9.75128	8.99821	7.85014	8.53488	7.94561	9.37543	2.63883	1.85152	1.93708	2.81217	2.16804	3.7928	1.04504	0.898507	2.11654	0.858044	1.15444	3.17981	0.790294	1.53122	0.983117	0.522152	0.77007	1.2976	-0.254748	0.632711	-1.13342	-0.335892	-0.384365	-1.88221
13402643	AT2G39030	7.18673	7.08132	7.60875	6.94527	8.22568	7.70453	7.57362	7.97549	8.28642	8.75288	11.215	12.1381	5.43866	6.06832	5.65497	4.95851	5.77763	8.2758	6.91105	6.62834	6.57897	8.85166	10.9216	11.6187	-1.74807	-1.013	-1.95379	-1.98676	-2.44804	0.571276	0.386892	0.894164	0.67767	1.80761	2.9893	4.43357	1.47239	0.560016	0.924009	3.89315	5.14395	3.34285	1.0855	-0.334148	0.246339	2.08554	2.15464	-1.09073
13404541	AT2G43510	8.45913	8.67573	9.05497	8.7026	9.11158	8.63424	8.37822	9.13927	9.47012	9.04991	9.92911	10.9208	7.83731	8.47444	8.86403	8.63047	8.90445	8.85055	8.5213	8.90707	9.34778	9.23219	9.94339	11.0354	-0.621816	-0.201286	-0.190938	-0.07213	-0.207134	0.21631	-0.080913	0.463537	0.415148	0.347315	0.817527	2.28655	0.683985	0.432626	0.48375	0.601728	1.03895	2.18481	0.764898	-0.030911	0.068602	0.254413	0.221418	-0.10174
13404550	AT2G43530	7.98792	8.27785	9.39459	8.36051	8.76551	8.8305	8.31153	8.08287	9.24974	9.32831	9.66737	10.4637	4.86376	4.49273	5.68635	5.31208	5.30218	5.8351	4.7237	5.14383	5.49204	5.28415	6.06311	7.27029	-3.12416	-3.78512	-3.70824	-3.04843	-3.46333	-2.9954	0.323609	-0.194977	-0.144853	0.967799	0.901861	1.63321	-0.140061	0.651096	-0.194305	-0.02793	0.760931	1.43519	-0.46367	0.846073	-0.049452	-0.995729	-0.14093	-0.198023
13408088	AT2G06050	6.22379	6.58104	6.78665	6.39471	6.8661	6.79167	6.6263	6.7237	7.33923	7.28617	8.0423	8.40494	7.51725	7.37183	7.55324	6.73114	7.18386	7.55507	8.07264	7.80014	7.42236	8.2134	8.17278	8.57829	1.29345	0.790787	0.76659	0.336428	0.317757	0.7634	0.402504	0.142654	0.552582	0.891459	1.1762	1.61327	0.555398	0.428308	-0.130873	1.48226	0.988921	1.02322	0.152894	0.285654	-0.683455	0.590798	-0.187277	-0.590049
13411796	AT2G22810	8.07239	7.88294	7.18787	7.80203	8.61974	7.82549	7.82987	7.13289	6.56605	7.45751	7.40656	5.44772	7.42687	8.05485	7.24058	6.76621	7.79023	5.81619	6.83737	6.58264	6.65807	5.68392	6.57484	4.7329	-0.645521	0.171909	0.052715	-1.03582	-0.82951	-2.00929	-0.242522	-0.750049	-0.621816	-0.344519	-1.21318	-2.37777	-0.589502	-1.4722	-0.582515	-1.08228	-1.21539	-1.08329	-0.34698	-0.722152	0.039301	-0.737766	-0.002212	1.29448
13412564	AT2G24850	5.95355	5.58815	5.79136	6.27228	6.74879	6.94033	6.04627	5.9272	6.61818	8.38726	10.6113	11.0916	6.35613	5.7165	5.75076	7.8876	7.63336	9.62445	7.42993	6.09539	6.76727	9.57718	10.5119	10.5106	0.402585	0.128344	-0.040599	1.61532	0.884565	2.68412	0.092722	0.339047	0.826825	2.11498	3.86254	4.15127	1.0738	0.378894	1.01651	1.68958	2.87855	0.88615	0.981079	0.039847	0.189688	-0.425401	-0.983985	-3.26512
13413221	AT2G26400	6.77918	6.4938	5.81412	5.4698	5.51634	6.37425	5.7465	5.66454	6.62347	5.0351	9.03911	10.1022	7.13085	6.21751	7.48543	7.93861	8.05614	8.75152	7.24648	7.04981	7.73085	8.02242	9.2195	9.73811	0.351665	-0.276281	1.67131	2.46881	2.53981	2.37726	-1.03269	-0.829258	0.809347	-0.434692	3.52278	3.72795	0.115633	0.832292	0.245415	0.083811	1.16336	0.98659	1.14832	1.66155	-0.563932	0.518503	-2.35942	-2.74136
13415110	AT2G30750	2.38199	2.51986	2.18807	2.32846	2.24176	2.13449	2.98616	2.81075	4.27025	3.26757	3.07584	3.48624	3.55818	2.98669	2.57949	2.51964	2.37095	2.11087	4.73882	4.37907	3.70771	4.57683	3.12837	2.92215	1.17619	0.466825	0.391424	0.19118	0.129196	-0.023615	0.604161	0.290889	2.08218	0.93911	0.834078	1.35175	1.18064	1.39239	1.12822	2.05719	0.757417	0.81128	0.576476	1.1015	-0.953961	1.11808	-0.076661	-0.540469
13415302	AT2G31180	4.47409	4.65895	4.25325	4.95431	4.35567	5.25861	3.77865	4.80274	4.48567	4.3894	5.4149	6.06424	4.50932	4.75099	4.62569	4.12412	5.19732	4.75099	3.9051	3.10244	4.75099	4.30772	4.47817	5.54719	0.035233	0.092045	0.372444	-0.830193	0.841655	-0.507624	-0.695437	0.143795	0.232423	-0.564909	1.05923	0.805626	-0.604226	-1.64855	0.125297	0.183608	-0.71915	0.796202	0.091211	-1.79235	-0.107126	0.748517	-1.77838	-0.009424
13420874	AT2G43580	3.88069	3.9412	4.51722	3.52771	4.36079	6.33354	4.24675	5.03055	4.77306	3.9142	5.31544	6.94799	4.51008	5.20467	4.21342	5.06806	3.91715	5.17105	5.40531	6.63466	5.69793	4.42054	4.76778	5.20359	0.629391	1.26347	-0.3038	1.54035	-0.443638	-1.1625	0.366062	1.08936	0.255845	0.386489	0.954654	0.614443	0.895231	1.42999	1.48451	-0.647523	0.85063	0.032545	0.529169	0.34063	1.22866	-1.03401	-0.104024	-0.581898
13421761	AT2G45760	2.37948	2.13436	2.27698	2.30318	2.19158	2.31788	2.25232	2.15909	2.27698	2.26287	3.7573	4.82533	4.71843	3.72396	2.83022	4.08423	3.80956	4.84188	5.60198	4.44577	2.94513	4.62029	4.65133	5.80937	2.33894	1.5896	0.55324	1.78105	1.61797	2.524	-0.127166	0.024727	7e-06	-0.040312	1.56571	2.50744	0.883547	0.721809	0.114916	0.536059	0.841774	0.96749	1.01071	0.697082	0.114909	0.576371	-0.723937	-1.53995
13426792	AT3G11340	7.81556	5.50995	5.23083	5.28057	5.65372	5.47363	8.12615	7.08598	7.53156	6.5268	9.43802	9.92194	8.64777	8.27882	7.39822	8.67672	8.27143	9.82554	9.94489	9.5543	8.41872	9.80668	10.3321	10.1306	0.832211	2.76886	2.16739	3.39615	2.6177	4.35191	0.310589	1.57603	2.30073	1.24623	3.7843	4.4483	1.29712	1.27549	1.02051	1.12996	2.06069	0.305079	0.986527	-0.300544	-1.28022	-0.116266	-1.72361	-4.14322
13426859	AT3G11480	2.97537	2.96045	3.03002	3.286	2.89122	2.99568	3.29356	2.91037	3.07502	4.1212	6.87457	8.52447	3.41845	3.37677	3.00453	2.99335	3.19677	3.05062	3.36406	2.97569	3.53638	4.44154	4.51191	6.65046	0.443084	0.416318	-0.025493	-0.292644	0.305548	0.054937	0.318188	-0.050082	0.044998	0.835201	3.98335	5.52879	-0.05439	-0.40108	0.531846	1.44819	1.31515	3.59984	-0.372578	-0.350998	0.486848	0.612989	-2.6682	-1.92895
13427922	AT3G13950	7.28941	7.0013	6.22866	6.06732	6.51438	6.91398	7.74119	7.53155	8.02828	7.33652	8.55047	9.65261	8.07394	7.69765	7.81536	7.56975	7.85823	8.6844	8.99287	8.7047	8.1457	8.17404	8.8608	9.59618	0.784531	0.696352	1.5867	1.50243	1.34386	1.77042	0.451782	0.530255	1.79962	1.26921	2.0361	2.73863	0.918934	1.00705	0.330342	0.604288	1.00256	0.911779	0.467152	0.476798	-1.46928	-0.66492	-1.03353	-1.82685
13433243	AT3G25760	7.74462	7.30105	6.91	6.70758	8.19316	8.14892	8.10212	7.72416	7.85789	8.0672	9.03364	9.30235	8.51477	7.89603	7.15604	7.0463	7.89682	8.17435	9.03053	8.46707	8.19456	8.5139	8.95619	9.36868	0.770145	0.594985	0.246038	0.33872	-0.296341	0.025431	0.357499	0.423115	0.947888	1.35962	0.840472	1.15343	0.515756	0.571036	1.03851	1.46761	1.05936	1.19433	0.158257	0.147921	0.090625	0.107986	0.218891	0.040901
13433253	AT3G25780	5.06926	4.84291	4.62237	5.13774	4.77372	4.72214	5.39703	5.37221	5.51443	6.03433	6.34634	7.21058	6.43135	6.09926	6.19466	5.95974	5.86103	6.6018	7.39818	6.63918	6.54141	7.34551	7.45485	7.91495	1.36208	1.25635	1.57229	0.821992	1.0873	1.87966	0.32777	0.529298	0.892066	0.896591	1.57262	2.48843	0.966833	0.539922	0.346755	1.38577	1.59382	1.31316	0.639063	0.010624	-0.545311	0.489181	0.021199	-1.17528
13433736	AT3G26830	6.47828	6.55619	6.5713	6.21988	5.98194	5.64876	7.89883	8.12749	8.37772	7.40619	7.17373	8.59464	8.89339	8.40542	8.06219	8.46093	7.15857	8.59363	10.0118	9.49856	8.76593	9.40712	7.99582	9.17425	2.41511	1.84924	1.49089	2.24105	1.17663	2.94487	1.42055	1.5713	1.80641	1.1863	1.19179	2.94588	1.11841	1.09313	0.703743	0.946191	0.837249	0.580624	-0.302142	-0.478169	-1.10267	-0.240114	-0.354542	-2.36525
13434325	AT3G28580	5.50108	4.574	4.32225	4.44551	4.70628	5.05176	4.96733	4.64329	5.43919	6.12225	6.34486	7.76225	7.42495	6.40516	6.50247	7.38101	5.93446	7.02008	7.59564	7.31817	6.38793	8.36441	7.19456	7.92657	1.92388	1.83115	2.18022	2.9355	1.22818	1.96832	-0.533745	0.069282	1.11695	1.67674	1.63858	2.71049	0.17069	0.913013	-0.114538	0.983393	1.2601	0.90649	0.704435	0.843731	-1.23149	-0.693347	-0.378481	-1.804
13435079	AT3G43250	3.42884	3.2054	3.00127	3.1437	3.28066	3.13236	3.6533	3.56731	4.06507	4.06925	4.5433	5.6758	3.52304	3.44683	3.37365	3.80902	3.07234	3.38307	4.62455	3.46617	3.52922	5.90437	4.03973	4.52011	0.094195	0.241436	0.372387	0.665317	-0.208322	0.25071	0.224464	0.361917	1.06381	0.925553	1.26264	2.54344	1.10151	0.019336	0.155564	2.09536	0.967394	1.13704	0.877046	-0.342581	-0.908244	1.16981	-0.295248	-1.4064
13438085	AT3G51450	6.97179	6.22025	6.07058	5.39147	6.9698	7.3987	7.13046	6.56817	7.1147	6.73007	8.93441	9.57911	7.47537	7.18875	7.45861	6.69645	7.71871	8.57922	8.19368	7.94655	8.01443	8.08408	9.29833	9.35983	0.503578	0.9685	1.38803	1.30499	0.748918	1.18051	0.158667	0.347924	1.04411	1.33861	1.96462	2.18041	0.718309	0.757803	0.555811	1.38763	1.57961	0.78061	0.559642	0.409879	-0.488303	0.04902	-0.385006	-1.3998
13447102	AT3G09940	6.77067	5.02782	4.83795	7.14615	6.3226	5.41986	6.94531	5.85736	6.57483	7.47167	8.85754	8.86838	8.45914	5.81864	6.11304	7.41714	7.12699	7.58116	8.49654	6.54732	6.82433	8.69319	8.02063	8.28973	1.68847	0.790819	1.27509	0.270991	0.804385	2.1613	0.17464	0.829533	1.73688	0.325524	2.53494	3.44852	0.0374	0.728672	0.71129	1.27606	0.893638	0.708571	-0.13724	-0.100861	-1.02559	0.950532	-1.6413	-2.73995
13452744	AT3G22910	5.91887	6.10435	5.77077	5.61514	5.54699	5.9196	5.62318	6.33762	5.89582	5.34988	7.25254	8.42667	6.28845	6.30851	6.16899	6.40451	6.49141	7.86461	6.7439	6.58553	6.17916	6.01798	7.8374	8.95688	0.369578	0.204162	0.398224	0.789367	0.944426	1.94501	-0.295689	0.233273	0.125048	-0.26526	1.70555	2.50707	0.455454	0.277017	0.010167	-0.386529	1.34599	1.09226	0.751143	0.043744	-0.114881	-0.121269	-0.359566	-1.41481
13453503	AT3G24900	4.59539	6.01242	4.39633	5.43075	5.4492	6.52043	4.27091	5.26696	5.56097	4.94785	6.90549	7.17608	4.77451	5.26153	4.17394	4.46271	3.33017	4.96913	4.63045	4.31595	5.01941	5.04328	4.57515	4.974	0.179121	-0.750897	-0.222388	-0.968042	-2.11903	-1.5513	-0.32448	-0.74546	1.16464	-0.482895	1.45629	0.655646	-0.144057	-0.945574	0.845463	0.580576	1.24499	0.004865	0.180423	-0.200114	-0.319172	1.06347	-0.2113	-0.650781
13454876	AT3G28740	4.40858	4.3989	5.16901	5.67764	6.32939	6.3846	4.58632	5.31683	6.01937	8.2064	8.77271	8.15517	4.48119	4.28913	4.53562	4.60032	5.37749	5.15688	5.02663	4.74634	4.96742	7.67788	6.96242	5.7003	0.072615	-0.109768	-0.633391	-1.07731	-0.951897	-1.22772	0.177745	0.917928	0.850364	2.52877	2.44332	1.77057	0.545432	0.457205	0.431801	3.07755	1.58493	0.543418	0.367687	-0.460723	-0.418563	0.548784	-0.858393	-1.22715
13455353	AT3G30775	10.9869	9.74959	10.2209	10.8684	9.90132	8.04479	11.0797	9.6548	10.0498	10.9963	9.09606	8.94956	10.2256	9.02452	9.54717	10.3679	8.95507	7.32721	10.1909	9.06586	9.49978	10.4376	8.28311	7.86274	-0.76136	-0.725062	-0.673687	-0.50054	-0.946247	-0.717583	0.09274	-0.094783	-0.1711	0.12785	-0.805255	0.904769	-0.03464	0.041332	-0.04739	0.0697	-0.671958	0.535533	-0.12738	0.136115	0.12371	-0.05815	0.133297	-0.369236
13457589	AT3G48850	4.13841	4.59682	3.98314	4.16325	4.46567	4.16916	5.41107	5.57958	5.43768	4.48201	5.66424	7.02393	7.18882	7.28423	6.12051	6.43409	6.2895	7.79258	8.60757	8.45038	7.53531	7.28637	7.28011	9.20052	3.05041	2.68741	2.13737	2.27084	1.82383	3.62342	1.27266	0.982763	1.45453	0.318764	1.19857	2.85476	1.41874	1.16615	1.4148	0.852281	0.990614	1.40794	0.146084	0.183391	-0.03974	0.533517	-0.207954	-1.44682
13460870	AT3G56710	6.48948	6.02463	6.95864	5.41205	6.19876	6.54098	6.8239	6.32469	7.46205	6.32878	7.17302	7.91999	7.33344	7.91049	8.41572	7.33448	7.71644	8.20242	8.31199	8.59402	8.37841	8.20472	8.42378	8.27568	0.843954	1.88586	1.45708	1.92242	1.51768	1.66144	0.334419	0.300066	0.503416	0.916732	0.974263	1.37902	0.978559	0.68353	-0.037308	0.870241	0.707342	0.073261	0.64414	0.383464	-0.540724	-0.046491	-0.266921	-1.30576
13461191	AT3G57460	7.39123	5.61745	4.77289	5.27597	5.68068	6.22926	7.98059	6.09879	6.14907	7.24523	9.03514	9.70827	4.94392	4.40747	4.30643	4.96641	5.0391	5.1044	5.55525	4.81426	4.54772	6.24409	6.52676	6.31919	-2.44731	-1.20998	-0.466461	-0.309565	-0.641572	-1.12485	0.58936	0.481344	1.37618	1.96926	3.35447	3.47901	0.611331	0.406789	0.241287	1.27769	1.48766	1.21479	0.021971	-0.074555	-1.13489	-0.691571	-1.86681	-2.26423
13466218	AT4G08040	8.58996	7.38334	7.34805	7.96976	7.37332	6.00014	7.99174	6.89032	6.50151	7.65361	6.17612	5.47091	9.26806	7.45583	6.54654	7.63798	7.74178	5.98823	8.67304	7.20806	6.41811	7.12345	6.66897	5.68032	0.678102	0.072495	-0.801512	-0.331773	0.368458	-0.011915	-0.598218	-0.493014	-0.846538	-0.316152	-1.19721	-0.529235	-0.595023	-0.247774	-0.128432	-0.514535	-1.07282	-0.30791	0.003195	0.24524	0.718106	-0.198383	0.124391	0.221325
13472475	AT4G23600	9.23374	9.33482	9.159	9.18859	9.95258	10.616	9.46925	9.32417	9.76189	10.2546	11.2318	11.5302	9.5277	9.36586	8.74003	8.45655	9.72019	10.4358	10.0731	9.62379	9.64138	10.2734	10.9964	11.3791	0.293968	0.031043	-0.418974	-0.73204	-0.232388	-0.18019	0.235516	-0.010651	0.602891	1.06601	1.27918	0.91418	0.545436	0.257925	0.901348	1.81688	1.27623	0.94331	0.30992	0.268576	0.298457	0.75087	-0.002952	0.02913
13476200	AT4G31800	8.51105	7.532	7.70296	8.34644	6.68635	6.14647	8.43049	7.44887	8.62426	9.18936	8.64827	8.8621	8.60027	8.24764	8.70153	9.3242	7.76194	8.20351	8.51732	9.26889	9.00864	9.87876	9.20426	9.40943	0.089216	0.715639	0.998577	0.977757	1.07559	2.05705	-0.080563	-0.083129	0.921301	0.842911	1.96192	2.71563	-0.082952	1.02125	0.307104	0.554555	1.44232	1.20592	-0.002389	1.10438	-0.614197	-0.288356	-0.519598	-1.50971
13478151	AT4G35770	11.2387	11.2279	10.468	10.4642	11.2981	9.91715	11.283	11.3204	10.2199	10.1375	10.3934	9.40286	10.8627	10.8504	10.2729	10.4698	10.8041	9.35297	11.0478	10.9852	10.1635	10.2248	10.0215	8.28561	-0.37604	-0.37749	-0.19508	0.00561	-0.49398	-0.564184	0.04427	0.09246	-0.24808	-0.32668	-0.90469	-0.514291	0.18512	0.13473	-0.10933	-0.24504	-0.78266	-1.06736	0.14085	0.04227	0.13875	0.08164	0.12203	-0.553068
13479362	AT4G39030	7.47647	6.57857	6.56827	6.97454	6.64079	7.11638	7.60602	7.43699	6.94319	7.52808	8.68387	9.79869	8.94777	8.2225	7.49379	8.70194	7.96015	8.94327	9.50631	8.70889	8.27848	9.77017	9.30204	9.60795	1.4713	1.64393	0.925521	1.72739	1.31936	1.82689	0.12955	0.858422	0.374922	0.553533	2.04308	2.68231	0.558543	0.486383	0.784691	1.06823	1.34189	0.664674	0.428993	-0.372039	0.409769	0.514698	-0.701188	-2.01763
13479796	AT4G39950	6.89846	7.36003	8.12316	7.86324	8.38233	8.57167	7.23642	8.27203	8.6127	8.35225	9.34749	10.1073	8.29159	8.98035	8.35175	7.77673	8.01089	8.65998	9.38345	9.3575	8.84092	8.54846	8.98699	9.85136	1.39313	1.62032	0.228584	-0.086505	-0.371445	0.088307	0.337963	0.912002	0.489537	0.489015	0.965152	1.53563	1.09186	0.377147	0.489171	0.771733	0.976101	1.19138	0.7539	-0.534855	-0.000366	0.282718	0.010949	-0.344246
13482338	AT4G08770	7.70244	6.76724	5.98571	7.99265	6.73325	5.89083	8.36294	8.33795	8.32323	7.91774	7.82754	9.04329	8.84476	6.69473	6.16981	7.41505	6.63596	7.76799	9.07745	7.77798	7.04258	8.35132	7.75222	10.1142	1.14233	-0.072513	0.184092	-0.577595	-0.097292	1.87716	0.6605	1.57071	2.33752	-0.07491	1.09429	3.15246	0.232688	1.08326	0.872773	0.936269	1.11626	2.34625	-0.427812	-0.487459	-1.46475	1.01118	0.021973	-0.806212
13482365	AT4G08870	7.81614	7.24442	7.5401	6.42319	9.17816	9.69133	7.89516	7.23829	8.15186	8.97225	11.0115	11.3558	3.9612	4.06207	3.3707	3.3235	3.82761	3.33437	3.56031	4.12894	3.59872	4.09487	3.15347	3.56339	-3.85494	-3.18236	-4.1694	-3.09969	-5.35055	-6.35696	0.079025	-0.006136	0.611759	2.54906	1.83335	1.66445	-0.400889	0.066869	0.228023	0.771365	-0.674135	0.229022	-0.479914	0.073005	-0.383736	-1.7777	-2.50748	-1.43543
13488230	AT4G22880	4.14513	3.08931	3.0716	4.60529	4.94545	8.1659	4.00131	3.12951	3.10463	5.3475	7.33436	9.8903	3.85465	3.27304	3.31666	3.36214	4.51285	5.80025	3.88817	3.06511	3.29158	3.70715	5.85091	6.72721	-0.290481	0.183729	0.245053	-1.24315	-0.432597	-2.36565	-0.143819	0.040205	0.033023	0.742218	2.38891	1.72441	0.033517	-0.207932	-0.025079	0.345011	1.33806	0.926963	0.177336	-0.248137	-0.058102	-0.397207	-1.05085	-0.797443
13488817	AT4G24230	8.64721	8.13552	8.08233	8.11167	8.12773	6.95258	8.83118	8.19631	7.62212	7.94862	7.27179	6.62778	7.90457	7.5316	7.57348	7.66554	7.40507	6.28121	8.01597	7.52664	7.49479	7.51939	6.56213	6.11953	-0.742642	-0.603927	-0.508848	-0.446129	-0.722661	-0.671373	0.183974	0.060783	-0.46021	-0.163052	-0.855938	-0.324798	0.111407	-0.004958	-0.078687	-0.146156	-0.842931	-0.161679	-0.072567	-0.065741	0.381523	0.016896	0.013007	0.163119
13493743	AT4G35180	6.91536	4.07415	4.33386	5.15595	3.99815	4.301	6.30488	4.81059	6.50795	6.48722	7.43116	7.72221	8.23467	7.37652	7.59681	7.6929	7.19232	7.76199	8.36081	8.6542	8.00315	8.95312	8.62873	8.3464	1.31931	3.30237	3.26295	2.53695	3.19417	3.46099	-0.610478	0.736438	2.1741	1.33127	3.433	3.42121	0.126139	1.27768	0.406344	1.26022	1.43641	0.584403	0.736617	0.54124	-1.76775	-0.07105	-1.99659	-2.83681
13494833	AT4G37610	9.46571	8.48619	9.06259	9.00831	8.88084	6.73033	9.80968	8.69573	8.80888	8.63702	7.56945	6.84348	9.08515	8.39574	8.99291	9.09727	8.52745	6.68636	9.46451	8.55728	8.68358	8.95488	7.09901	6.67731	-0.38056	-0.090442	-0.069679	0.088964	-0.353386	-0.043968	0.343973	0.209549	-0.253716	-0.371292	-1.31138	0.113148	0.379356	0.161538	-0.309332	-0.142397	-1.42844	-0.009053	0.035383	-0.048011	-0.055616	0.228895	-0.117057	-0.122201
13498037	AT5G05600	7.54392	7.2825	7.06614	6.63117	7.15055	6.44498	7.65443	7.82704	7.97536	8.11093	8.95585	9.45152	6.77606	6.47912	6.07553	6.13922	6.4094	6.77456	7.62826	7.07256	7.20289	8.0602	8.29645	8.64754	-0.767859	-0.803379	-0.990607	-0.491954	-0.741152	0.329584	0.110507	0.544534	0.909218	1.47976	1.8053	3.00654	0.852194	0.593435	1.12736	1.92098	1.88705	1.87298	0.741687	0.048901	0.218141	0.441216	0.081748	-1.13356
13499516	AT5G09290	5.10907	5.08007	4.85487	4.40032	5.39853	5.15877	5.04549	5.19298	6.10111	4.65872	6.49376	7.76807	7.50782	7.54315	8.1395	8.33628	8.08971	8.55917	7.70005	8.0405	8.237	8.13275	8.86577	9.13968	2.39875	2.46308	3.28462	3.93596	2.69118	3.4004	-0.063577	0.112904	1.24624	0.258401	1.09522	2.6093	0.192226	0.497344	0.097505	-0.203525	0.776057	0.580511	0.255803	0.38444	-1.14874	-0.461926	-0.319168	-2.02879
13499909	AT5G10300	5.44686	5.64884	6.12692	6.24645	6.48773	6.30517	5.62629	5.6585	6.21431	6.71306	7.34732	7.97695	6.27298	5.72448	6.83751	6.55364	6.84841	6.971	5.90684	6.47472	6.80654	7.43269	7.71388	7.81522	0.826115	0.075643	0.71059	0.307193	0.360677	0.665824	0.179425	0.009665	0.087391	0.466605	0.85958	1.67178	-0.366136	0.750245	-0.030971	0.879047	0.865466	0.844227	-0.545561	0.74058	-0.118362	0.412442	0.005886	-0.827553
13500911	AT5G13220	6.40216	5.85294	6.12518	6.2457	5.59637	5.38779	6.7022	6.40234	6.61501	7.23999	8.53575	9.35294	7.12069	5.98942	6.14789	6.61455	6.30077	6.70339	7.20375	6.24467	6.92552	7.77373	7.68203	8.58104	0.71853	0.136485	0.022715	0.368848	0.704398	1.3156	0.300036	0.549399	0.489837	0.994288	2.93937	3.96516	0.083054	0.255251	0.777625	1.15918	1.38126	1.87765	-0.216982	-0.294148	0.287788	0.16489	-1.55811	-2.08751
13500977	AT5G13330	7.26197	7.25345	7.37362	6.91356	6.50772	6.75251	7.85718	8.14197	8.27054	7.34412	7.71259	9.31637	8.262	8.20279	8.41665	8.36952	7.47904	7.64757	9.00921	9.31822	9.22689	8.94889	8.454	9.63436	1.00003	0.949334	1.04303	1.45596	0.971328	0.89506	0.595212	0.888519	0.896925	0.430555	1.20487	2.56386	0.747208	1.11543	0.810243	0.579364	0.974954	1.98679	0.151996	0.226912	-0.086682	0.148809	-0.229921	-0.577068
13508039	AT5G38350	3.18504	3.45338	3.37995	3.24118	3.8457	3.36562	3.68333	3.37744	3.11277	3.48475	2.88678	4.11263	3.94902	3.37565	3.45642	3.29229	2.91956	3.52322	3.65233	3.40152	3.61773	3.54022	3.79975	3.54022	0.763979	-0.077732	0.07647	0.051114	-0.926144	0.157602	0.498297	-0.075945	-0.267184	0.243573	-0.958924	0.747014	-0.296681	0.025873	0.161307	0.247929	0.880192	0.017	-0.794978	0.101818	0.428491	0.004356	1.83912	-0.730014
13517207	AT5G59820	6.43091	5.42136	6.28192	6.01243	4.72882	4.32232	6.72918	5.38988	5.89146	6.6256	5.60285	6.70603	7.48463	6.42818	6.94722	6.76558	5.82416	6.34704	8.16695	7.49052	6.43721	7.85915	6.69457	7.44047	1.05372	1.00682	0.665297	0.753155	1.09533	2.02473	0.298265	-0.031483	-0.390467	0.613172	0.874021	2.38371	0.682317	1.06234	-0.510013	1.09356	0.870415	1.09343	0.384052	1.09383	-0.119546	0.480393	-0.003606	-1.29029
13519410	AT5G64810	5.79882	5.03083	4.8605	4.76119	5.04855	6.37315	5.92336	5.35504	6.52381	6.08549	8.15958	9.14285	7.48346	7.51132	8.23067	8.6059	7.90717	8.4271	7.80496	8.12407	8.29608	9.1598	8.86597	9.23857	1.68464	2.48049	3.37017	3.8447	2.85861	2.05395	0.124539	0.32421	1.66331	1.3243	3.11103	2.7697	0.321502	0.612755	0.065409	0.553899	0.9588	0.811466	0.196963	0.288545	-1.5979	-0.770399	-2.15223	-1.95823
13520416	AT5G67080	5.06932	4.0946	4.28486	4.74918	3.58548	3.79012	5.07387	5.39565	4.40066	5.73022	5.61159	6.68099	5.93936	4.70336	4.25257	4.59549	4.21118	4.5928	6.21233	5.48182	5.15509	6.83894	5.3411	6.14304	0.870039	0.608762	-0.032294	-0.153693	0.625697	0.802677	0.004552	1.30105	0.115804	0.981033	2.0261	2.89087	0.272969	0.778458	0.902521	2.24345	1.12991	1.55025	0.268417	-0.522589	0.786717	1.26242	-0.89619	-1.34062
13521047	AT5G01900	3.67078	3.94608	3.04847	3.8226	3.05007	3.70159	3.70981	3.78292	3.43284	3.63071	5.4844	5.654	4.07306	3.70804	4.49524	4.63048	4.48156	4.61834	3.7226	4.33854	4.77325	5.37709	6.37412	5.96722	0.402275	-0.238039	1.44677	0.807877	1.43149	0.916757	0.039025	-0.163153	0.384375	-0.191885	2.43433	1.95242	-0.350457	0.630497	0.278011	0.746615	1.89256	1.34887	-0.389482	0.79365	-0.106364	0.9385	-0.541769	-0.603544
13522950	AT5G07010	8.19851	8.64954	7.50115	6.57972	8.21072	7.0503	8.18967	8.29175	7.98527	7.04328	9.5458	10.5882	8.17852	9.49591	8.73088	5.95626	8.04976	7.06104	8.37747	9.29802	8.70063	7.40256	8.78203	9.78863	-0.019997	0.846372	1.22973	-0.623457	-0.160956	0.010741	-0.008841	-0.357785	0.484126	0.463561	1.33509	3.53792	0.198957	-0.197883	-0.030248	1.4463	0.732263	2.72759	0.207798	0.159902	-0.514374	0.982738	-0.602822	-0.810329
13529467	AT5G22570	5.51689	4.80696	4.63294	4.02018	5.18926	5.29898	5.21783	5.21631	6.03265	4.80135	7.46295	8.51233	6.28948	7.63601	8.32376	7.95944	7.63368	7.92195	6.67711	8.18004	8.07489	8.31837	8.70392	8.48176	0.772586	2.82905	3.69082	3.93925	2.44442	2.62298	-0.299064	0.409353	1.3997	0.781168	2.27369	3.21335	0.387634	0.544035	-0.248867	0.358937	1.07024	0.55981	0.686698	0.134682	-1.64857	-0.422231	-1.20345	-2.65354
13530600	AT5G24770	4.11243	3.39146	3.62785	3.29077	4.3556	4.49845	3.70561	3.60958	3.59536	3.6429	7.51932	8.58965	3.49378	3.5045	3.21708	3.78214	3.25833	3.46111	3.64283	3.30091	3.28304	3.42128	4.7022	4.49109	-0.618646	0.113039	-0.410775	0.491369	-1.09727	-1.03734	-0.406819	0.218114	-0.032489	0.352123	3.16372	4.0912	0.149045	-0.203588	0.065958	-0.360865	1.44387	1.02998	0.555864	-0.421702	0.098447	-0.712988	-1.71985	-3.06122
13530607	AT5G24780	6.05524	5.28761	5.4586	5.03901	5.729	5.6878	6.0541	5.69126	6.00967	5.67068	8.62335	10.1824	4.62181	4.40126	3.80358	4.3475	5.5582	4.60807	4.18732	3.80358	5.20282	5.73304	7.14469	8.73624	-1.43344	-0.886349	-1.65502	-0.691504	-0.170807	-1.07973	-0.001148	0.40365	0.551068	0.631675	2.89434	4.49456	-0.434485	-0.597681	1.39924	1.38554	1.58649	4.12817	-0.433337	-1.00133	0.848175	0.753863	-1.30786	-0.366393
13531409	AT5G27060	4.9995	5.72039	6.04475	5.54088	5.5389	5.29661	4.93832	6.15341	5.67092	6.264	8.25427	8.86168	3.84745	4.57676	4.22796	4.09048	4.38378	5.82683	5.60754	5.18878	4.31533	6.17873	6.28563	7.3013	-1.15205	-1.14363	-1.81679	-1.4504	-1.15513	0.530213	-0.06118	0.433024	-0.373835	0.723125	2.71537	3.56507	1.76009	0.612027	0.087367	2.08826	1.90185	1.47448	1.82127	0.179003	0.461202	1.36513	-0.813518	-2.09059
13533607	AT5G39610	8.99859	8.6865	8.47008	7.66088	7.89257	8.06753	8.93646	8.67682	9.06036	7.21633	6.9265	7.95171	9.52778	9.2374	9.44852	8.52693	8.08379	8.41317	9.72555	9.99595	9.47451	8.64022	7.3521	8.20781	0.529194	0.550895	0.978438	0.86605	0.191218	0.345645	-0.062128	-0.009682	0.590275	-0.444556	-0.966068	-0.115816	0.197766	0.758555	0.025985	0.113283	-0.731684	-0.20536	0.259894	0.768237	-0.56429	0.557839	0.234384	-0.089544
13535388	AT5G44420	6.71151	6.61815	6.15911	5.39257	7.56139	6.50938	6.36081	7.0462	8.38505	7.63242	9.31871	8.82622	4.3609	4.56621	3.6128	2.87226	3.93596	4.63471	6.01535	6.21688	5.64102	4.49217	5.21302	4.71622	-2.35061	-2.05194	-2.54631	-2.52031	-3.62543	-1.87466	-0.350698	0.428057	2.22594	2.23985	1.75732	2.31684	1.65445	1.65067	2.02822	1.61991	1.27706	0.081512	2.00515	1.22261	-0.197716	-0.619944	-0.480258	-2.23533
13354462	AT1G62660	7.28374	7.20369	7.24128	8.19768	8.60763	8.64632	6.84794	7.19367	7.31138	8.52959	9.28389	9.9609	7.07987	6.49442	6.75473	7.47286	7.49933	7.69473	6.48995	6.34842	6.74047	7.63959	8.05797	9.00431	-0.203864	-0.709269	-0.48655	-0.724823	-1.1083	-0.951593	-0.435798	-0.010019	0.070095	0.331907	0.676266	1.31458	-0.589927	-0.145998	-0.014258	0.166734	0.558643	1.30958	-0.154129	-0.135979	-0.084353	-0.165173	-0.117623	-0.004999
13357574	AT1G70700	10.634	10.2003	10.4072	10.6017	10.7345	10.3207	10.6901	10.492	10.8193	11.1911	11.2695	11.5925	10.5551	10.1263	10.0681	10.4952	10.7146	10.7485	11.0311	10.452	10.5515	11.2726	11.2904	11.476	-0.07889	-0.07397	-0.33904	-0.10654	-0.01992	0.42787	0.05606	0.2917	0.41209	0.58935	0.53492	1.27183	0.476	0.32569	0.48339	0.7774	0.57583	0.72751	0.41994	0.03399	0.0713	0.18805	0.04091	-0.54432
13373301	AT1G28370	6.58292	5.74683	6.5919	6.42514	5.61858	5.77681	6.94669	6.5181	6.49904	7.85919	6.21566	6.85093	6.49752	7.00432	7.16763	6.04068	6.07425	6.71191	7.12431	7.6444	6.76774	7.87154	6.68475	6.69604	-0.085407	1.25748	0.575729	-0.384467	0.455667	0.9351	0.363763	0.77127	-0.092867	1.43405	0.597083	1.07412	0.626794	0.640081	-0.399891	1.83086	0.610498	-0.015869	0.263031	-0.131189	-0.307024	0.396811	0.013415	-1.08999
13418736	AT2G38860	8.6442	8.27746	7.93883	7.94567	8.16567	8.37021	9.09474	9.21593	9.06258	8.40957	8.84161	9.28323	9.36777	9.41676	9.3844	8.69365	8.82171	9.09359	10.3747	10.3266	9.8041	9.40678	9.37813	9.77221	0.723576	1.1393	1.44557	0.747979	0.656043	0.723381	0.450542	0.938473	1.12375	0.463898	0.675941	0.913019	1.0069	0.909851	0.419697	0.713133	0.55642	0.678619	0.556356	-0.028622	-0.704052	0.249235	-0.119521	-0.2344
13430792	AT3G19970	6.49488	5.91757	5.92601	6.85151	6.71112	6.75438	6.1531	5.99608	6.20207	7.25731	7.1549	8.0924	6.78694	6.21469	6.56755	7.11791	6.98631	7.47006	6.99499	6.29695	6.29295	8.21521	7.58819	8.49954	0.29206	0.297123	0.641531	0.266406	0.275192	0.71568	-0.341779	0.07851	0.276054	0.4058	0.443778	1.33802	0.208051	0.082256	-0.274596	1.0973	0.601882	1.02948	0.54983	0.003746	-0.55065	0.691498	0.158104	-0.308542
13432135	AT3G23250	6.67966	6.42179	5.75181	5.25256	5.66316	5.00471	7.32949	6.81468	7.38148	6.27916	6.18027	6.58613	6.59081	6.53309	5.86126	5.28529	5.63369	5.87271	7.9378	7.15133	6.66761	7.19221	6.11644	6.48611	-0.088849	0.111296	0.10945	0.032732	-0.029466	0.868	0.649829	0.392892	1.62967	1.02661	0.517112	1.58142	1.34699	0.618246	0.806344	1.90692	0.482744	0.613401	0.697162	0.225354	-0.823322	0.880313	-0.034368	-0.968022
13469960	AT4G17500	6.8936	6.85373	7.3087	6.09394	6.44186	5.29278	7.4669	7.54857	7.29926	7.26772	6.1862	6.57202	7.83584	7.06214	7.00635	6.55692	6.39639	6.90334	8.49007	8.07268	7.43629	8.19086	6.80582	7.73762	0.942238	0.208412	-0.302356	0.462985	-0.045475	1.61056	0.573297	0.694845	-0.009441	1.17378	-0.25566	1.27924	0.654226	1.01054	0.429946	1.63393	0.40943	0.834274	0.080929	0.315691	0.439387	0.460155	0.66509	-0.444964
13498516	AT5G06870	7.59521	7.87432	7.94639	7.31581	8.56188	7.89694	7.74264	8.32003	8.26401	8.41037	9.06669	9.28489	7.54164	7.44075	7.70861	7.3049	8.14397	8.05033	8.00977	7.80867	7.90782	8.42089	8.77728	8.69125	-0.053572	-0.433565	-0.237787	-0.010909	-0.417904	0.153384	0.147425	0.445707	0.31762	1.09456	0.50481	1.38794	0.468124	0.367912	0.19922	1.11598	0.633312	0.640923	0.320699	-0.077795	-0.1184	0.021424	0.128502	-0.747022
[truncated: 26 more columns]

## Sheet: 48h
Affymetrix ST 1.0 Probe	New locus	2h Col-0 Mock	4h Col-0 Mock	8h Col-0 Mock	16h Col-0 Mock	24h Col-0 Mock	48h Col-0 Mock	2h Col-0 Pst	4h Col-0 Pst	8h Col-0 Pst	16h Col-0 Pst	24h Col-0 Pst	48h Col-0 Pst	2h C24 Mock	4h C24 Mock	8h C24 Mock	16h C24 Mock	24h C24 Mock	48h C24 Mock	2h C24 Pst	4h C24 Pst	8h C24 Pst	16h C24 Pst	24h C24 Pst	48h C24 Pst	2h C24 Mock - Col-0 Mock	4h C24 Mock - Col-0 Mock	8h C24 Mock - Col-0 Mock	16h C24 Mock - Col-0 Mock	24h C24 Mock - Col-0 Mock	48h C24 Mock - Col-0 Mock	2h Col-0 Pst - Mock	4h Col-0 Pst - Mock	8h Col-0 Pst - Mock	16h Col-0 Pst - Mock	24h Col-0 Pst - Mock	48h Col-0 Pst - Mock	2h C24 Pst - Mock	4h C24 Pst - Mock	8h C24 Pst - Mock	16h C24 Pst - Mock	24h C24 Pst - Mock	48h C24 Pst - Mock	2h C24 Pst - Col-0 Pst (each Mock subtracted)	4h C24 Pst - Col-0 Pst (each Mock subtracted)	8h C24 Pst - Col-0 Pst (each Mock subtracted)	16h C24 Pst - Col-0 Pst (each Mock subtracted)	24h C24 Pst - Col-0 Pst (each Mock subtracted)	48h C24 Pst - Col-0 Pst (each Mock subtracted)
13334341	AT1G01480	3.26941	3.42363	3.19663	3.27618	3.45382	3.39455	3.82612	3.57832	3.43547	3.36911	4.38689	5.46568	3.64683	3.79507	3.47614	3.57993	3.7603	4.01013	4.81375	4.04744	3.63069	4.49894	3.85877	5.4166	0.377428	0.371431	0.279514	0.303745	0.30648	0.615576	0.556712	0.154685	0.238841	0.09293	0.933068	2.07112	1.16692	0.252379	0.154546	0.919015	0.098465	1.40647	0.610206	0.097694	-0.084295	0.826085	-0.834603	-0.664658
13336414	AT1G06080	6.17388	8.51971	8.72407	6.88471	7.98248	7.42892	6.66573	8.26845	7.72949	6.16157	6.93562	4.84736	4.38661	7.24416	7.67274	4.96948	7.14033	6.65907	4.73364	6.88911	7.24464	4.81602	5.91093	5.57784	-1.78727	-1.27555	-1.05133	-1.91523	-0.842147	-0.769858	0.491854	-0.251259	-0.994583	-0.723138	-1.04686	-2.58157	0.347035	-0.355054	-0.428102	-0.153457	-1.2294	-1.08123	-0.144819	-0.103795	0.566481	0.569681	-0.182541	1.50034
13336448	AT1G06180	5.4522	4.94618	5.9241	5.56135	5.33001	5.58878	5.51119	5.50571	6.52373	5.88976	6.12693	7.01644	5.4522	5.66048	6.1639	6.02207	5.39808	6.18874	6.02152	6.53556	6.90661	6.40764	6.35655	7.12421	0	0.714297	0.239803	0.460714	0.068071	0.599966	0.058989	0.559529	0.599629	0.328403	0.796919	1.42766	0.569314	0.875085	0.742707	0.385576	0.958465	0.935467	0.510325	0.315556	0.143078	0.057173	0.161546	-0.492193
13336657	AT1G06620	5.88209	5.0126	5.68784	5.27649	5.33293	5.60389	6.47507	5.47049	6.33018	6.64029	7.83372	8.61519	6.68103	6.12808	6.41689	6.06802	6.74413	7.28069	7.15327	6.65774	7.13875	7.24524	8.15635	8.72324	0.798941	1.11548	0.729056	0.79153	1.4112	1.6768	0.592989	0.457884	0.642344	1.36381	2.50079	3.01131	0.472249	0.529662	0.721859	1.17723	1.41223	1.44255	-0.12074	0.071778	0.079515	-0.186582	-1.08856	-1.56876
13342060	AT1G19020	6.81374	5.16415	5.31554	5.16299	4.75513	3.86387	6.99519	5.72095	5.97931	5.74396	5.4691	5.89513	7.69096	5.98765	5.68686	6.09365	5.9421	5.98217	8.33544	7.23117	6.39677	6.9044	6.30581	6.79108	0.877222	0.823505	0.371322	0.930664	1.18697	2.1183	0.181449	0.556802	0.663772	0.580977	0.713964	2.03126	0.644481	1.24352	0.709907	0.810744	0.363713	0.808907	0.463032	0.68672	0.046135	0.229767	-0.350251	-1.22235
13342166	AT1G19180	9.59001	9.22624	9.65319	8.89587	8.81675	8.21361	9.73565	9.86027	9.97983	10.0344	10.1861	10.9581	10.1022	9.60848	9.44247	9.09279	8.61584	9.23109	10.5319	10.1657	9.95161	10.3377	9.92053	10.5076	0.512236	0.382236	-0.210722	0.196922	-0.20091	1.01749	0.145637	0.634027	0.326642	1.13851	1.36931	2.74449	0.42969	0.557191	0.509138	1.24486	1.30469	1.27645	0.284053	-0.076836	0.182496	0.106348	-0.064616	-1.46804
13343699	AT1G23120	5.12078	5.09094	4.60885	5.16556	4.9974	4.75539	5.3323	4.90194	5.9156	4.9196	5.39928	6.12696	5.25277	5.74786	5.54371	5.60519	5.88608	5.88627	5.41467	6.13226	6.32149	6.2735	6.2365	6.70287	0.132	0.656922	0.934859	0.439628	0.888684	1.13088	0.211524	-0.189003	1.30675	-0.245967	0.40188	1.37157	0.161898	0.384395	0.777783	0.668304	0.350419	0.816602	-0.049626	0.573398	-0.528971	0.914271	-0.051461	-0.554969
13346118	AT1G30135	3.11443	2.82293	3.18435	3.11998	3.30126	2.70765	3.37394	3.28509	3.18312	4.09314	4.1991	5.18876	3.12802	3.40391	3.24107	3.29174	3.40734	3.34726	4.04106	3.52572	3.22517	4.16635	4.36564	4.84095	0.013597	0.580983	0.056725	0.171757	0.106077	0.639606	0.259519	0.46216	-0.001231	0.973159	0.897838	2.4811	0.913042	0.121807	-0.015908	0.874612	0.958299	1.49369	0.653523	-0.340353	-0.014677	-0.098547	0.060461	-0.987419
13347601	AT1G33960	8.27599	7.80166	6.84637	6.84139	7.42206	7.38602	7.93442	8.03697	6.9796	7.0472	9.90564	11.0726	7.15741	6.65107	6.4581	7.01493	6.80761	8.09563	7.49113	6.8464	6.24904	7.09783	8.75473	9.5967	-1.11858	-1.15059	-0.38827	0.173535	-0.614443	0.709616	-0.341565	0.235305	0.133235	0.205811	2.48359	3.68662	0.333719	0.195322	-0.209055	0.082899	1.94711	1.50107	0.675284	-0.039983	-0.34229	-0.122912	-0.536475	-2.18555
13348604	AT1G43160	6.81954	6.02274	5.05857	4.81458	4.81972	4.57116	6.61807	5.82908	5.15854	5.11646	6.44692	8.03133	5.22318	4.71055	4.62913	5.06003	4.94035	5.15534	6.31558	5.05081	5.52428	5.73938	5.68539	6.74172	-1.59636	-1.3122	-0.429442	0.245452	0.120635	0.584187	-0.201475	-0.193666	0.099969	0.301878	1.6272	3.46017	1.0924	0.340265	0.895147	0.679342	0.745035	1.58638	1.29387	0.533931	0.795178	0.377464	-0.882168	-1.87379
13351018	AT1G51780	4.78971	5.02805	5.35332	4.6878	4.90393	4.99045	4.88964	4.50041	4.93424	5.81904	8.10831	9.41625	5.78729	4.59982	4.49637	4.32602	4.56184	5.5756	6.22125	4.74909	5.76237	6.45645	7.11489	9.42887	0.997581	-0.428226	-0.856948	-0.361786	-0.342088	0.585151	0.099925	-0.527639	-0.419075	1.13123	3.20438	4.4258	0.433959	0.149263	1.266	2.13043	2.55304	3.85327	0.334034	0.676902	1.68507	0.999196	-0.651333	-0.572533
13353060	AT1G57560	3.12689	3.0572	2.91519	3.29814	3.21089	3.57383	3.03178	3.07333	2.41118	3.12191	4.07076	4.99082	3.0294	2.99086	2.94973	3.35859	2.95389	3.22804	2.97588	2.6572	3.23716	3.62183	3.28126	3.98205	-0.09749	-0.06634	0.034535	0.060442	-0.257007	-0.345792	-0.095113	0.01613	-0.50401	-0.176232	0.85987	1.41699	-0.053518	-0.333665	0.287431	0.263243	0.327375	0.754008	0.041595	-0.349795	0.791441	0.439475	-0.532495	-0.662979
13353261	AT1G58340	3.47097	3.451	3.55519	3.55784	3.63964	3.61267	4.75603	3.52048	3.33541	3.43799	3.53682	4.88558	3.63754	3.58902	3.73581	3.99868	4.27087	3.56852	4.44064	4.01289	4.36906	4.32576	3.8624	6.02006	0.166578	0.138026	0.180614	0.440841	0.631233	-0.044143	1.28506	0.069487	-0.219787	-0.119844	-0.102819	1.27291	0.803099	0.423869	0.633248	0.327078	-0.408471	2.45153	-0.481961	0.354382	0.853035	0.446922	-0.305652	1.17862
13353943	AT1G61120	5.41707	5.86437	6.28148	5.98384	6.35535	5.03275	5.67034	6.77993	6.73407	7.51219	9.21101	10.2522	5.15164	4.57048	5.09219	5.06371	5.05937	6.16462	6.21472	5.73319	5.95349	7.62737	7.02013	7.4141	-0.26543	-1.29389	-1.18929	-0.920135	-1.29598	1.13188	0.253272	0.915556	0.452589	1.52835	2.85567	5.21948	1.06308	1.16271	0.861304	2.56366	1.96076	1.24948	0.80981	0.247156	0.408715	1.03532	-0.894912	-3.97
13354117	AT1G61610	6.0851	6.66069	6.58055	6.18374	6.78113	7.25291	6.24109	6.44648	6.55794	6.82162	8.77739	9.55193	6.7649	6.5009	6.46422	6.2205	6.87978	7.29684	7.53332	6.4315	6.36556	6.62682	8.08439	9.60591	0.679803	-0.159788	-0.116323	0.036763	0.098649	0.043927	0.155995	-0.214211	-0.02261	0.637875	1.99625	2.29901	0.768425	-0.0694	-0.098665	0.406315	1.20461	2.30906	0.61243	0.144811	-0.076055	-0.23156	-0.791645	0.010051
13354180	AT1G61800	6.99134	6.27948	5.56	5.18392	6.18375	6.45961	7.6425	7.61838	6.89834	6.03339	7.85495	9.21194	9.08917	8.13059	7.14378	7.78859	7.37824	8.5311	9.87295	9.22416	7.99319	8.41109	8.68196	9.80399	2.09783	1.85111	1.58378	2.60467	1.1945	2.07149	0.651164	1.3389	1.33835	0.849474	1.6712	2.75233	0.783785	1.09357	0.849415	0.622505	1.30371	1.27289	0.132621	-0.245333	-0.488934	-0.226969	-0.367492	-1.47944
13354462	AT1G62660	7.28374	7.20369	7.24128	8.19768	8.60763	8.64632	6.84794	7.19367	7.31138	8.52959	9.28389	9.9609	7.07987	6.49442	6.75473	7.47286	7.49933	7.69473	6.48995	6.34842	6.74047	7.63959	8.05797	9.00431	-0.203864	-0.709269	-0.48655	-0.724823	-1.1083	-0.951593	-0.435798	-0.010019	0.070095	0.331907	0.676266	1.31458	-0.589927	-0.145998	-0.014258	0.166734	0.558643	1.30958	-0.154129	-0.135979	-0.084353	-0.165173	-0.117623	-0.004999
13355717	AT1G66160	5.30788	4.84607	4.72044	5.0778	4.15507	3.11998	5.59289	5.0758	4.52376	5.14194	4.32369	4.21222	5.94993	5.20295	4.34923	5.02408	4.76481	3.84216	5.96451	5.41998	4.60379	5.20123	4.81054	5.32997	0.642053	0.356874	-0.371208	-0.053719	0.609744	0.722177	0.285015	0.229728	-0.196682	0.064137	0.168623	1.09224	0.014579	0.217035	0.254553	0.177151	0.045728	1.48781	-0.270436	-0.012693	0.451235	0.113014	-0.122895	0.395577
13355772	AT1G66370	4.61259	4.52401	5.33379	5.5813	5.98688	5.84922	4.105	4.94321	5.99548	6.53267	7.64048	8.84603	5.27682	5.28937	5.22933	4.74808	5.6238	6.10846	4.91858	5.28475	5.44357	6.43221	6.92779	8.08474	0.66423	0.765368	-0.104456	-0.833221	-0.36308	0.259241	-0.50759	0.419208	0.66169	0.951369	1.6536	2.99681	-0.358241	-0.004621	0.21424	1.68414	1.30399	1.97629	0.149349	-0.423829	-0.44745	0.732767	-0.349607	-1.02052
13355776	AT1G66380	3.08214	3.45346	2.75326	2.83321	2.8765	2.87737	2.59387	3.17094	2.66972	3.05016	2.88344	4.11128	3.47243	2.97442	2.71567	2.52595	2.73587	2.95257	3.97733	2.9872	3.11412	2.59239	2.65482	5.70827	0.390282	-0.479043	-0.037589	-0.307257	-0.140629	0.075203	-0.488279	-0.28252	-0.083547	0.216952	0.006937	1.23391	0.504904	0.01278	0.39845	0.066433	-0.081047	2.75569	0.993183	0.2953	0.481997	-0.150519	-0.087984	1.52178
13355915	AT1G66760	6.50972	6.12398	6.23218	6.38022	6.46484	6.19318	6.56203	6.23401	5.98288	6.44999	6.83068	7.44467	6.64268	5.86247	5.88943	5.89574	6.24358	6.43482	6.86904	6.17658	6.24854	6.58328	6.40877	7.83824	0.132955	-0.26151	-0.342757	-0.484482	-0.221263	0.241633	0.052305	0.110035	-0.249301	0.069771	0.365839	1.25148	0.226364	0.314112	0.359116	0.687537	0.165191	1.40342	0.174059	0.204077	0.608417	0.617766	-0.200648	0.151935
13358339	AT1G72520	7.47596	6.71582	6.55654	7.16005	6.98865	7.00642	7.37647	7.27486	7.03397	8.51734	8.22521	9.11704	8.09895	7.10558	6.91231	7.89811	7.35893	7.5716	8.36836	7.36484	7.14312	8.88496	7.91833	8.53144	0.622992	0.389759	0.355771	0.738062	0.37028	0.565179	-0.099488	0.559032	0.47744	1.35729	1.23656	2.11063	0.269407	0.259262	0.230811	0.986853	0.559398	0.959846	0.368895	-0.29977	-0.246629	-0.370439	-0.67716	-1.15078
13360638	AT1G78410	6.25711	4.8518	5.26618	5.86033	4.61272	4.32867	6.86149	5.86114	6.01408	6.9553	5.20301	5.64288	7.16832	6.60872	6.64881	6.85365	5.96189	6.07968	7.50831	7.15492	6.83356	7.35678	6.27885	6.90397	0.911213	1.75692	1.38262	0.993322	1.34917	1.75101	0.604378	1.00933	0.747901	1.09497	0.59029	1.3142	0.33999	0.546202	0.184755	0.503124	0.31696	0.824288	-0.264388	-0.46313	-0.563146	-0.59185	-0.27333	-0.489913
13367421	AT1G13340	6.10433	6.42281	6.12786	6.27994	6.48061	6.03096	6.40529	6.43456	6.84067	6.50554	7.41242	8.71758	7.9126	7.52097	7.62008	8.07536	7.85619	8.10573	8.78181	7.92948	7.52701	8.29621	8.53357	9.10594	1.80828	1.09816	1.49222	1.79542	1.37558	2.07477	0.300964	0.011748	0.712809	0.225601	0.93181	2.68662	0.869205	0.408501	-0.093063	0.220854	0.677378	1.00021	0.568241	0.396753	-0.805872	-0.004747	-0.254432	-1.68641
13368466	AT1G15520	7.00984	6.21121	5.99746	6.20161	5.98167	6.07115	8.18219	7.55926	6.94442	6.52004	8.817	10.3656	9.78294	8.60355	7.63012	9.20808	8.37528	9.57958	10.6889	9.79143	8.8253	9.85919	9.84395	11.0452	2.7731	2.39234	1.63266	3.00647	2.39362	3.50843	1.17234	1.34805	0.946962	0.318433	2.83533	4.29444	0.905916	1.18788	1.19519	0.651111	1.46867	1.4656	-0.266429	-0.160166	0.248225	0.332678	-1.36666	-2.82884
13369126	AT1G17380	5.81926	5.46615	5.89924	6.18544	6.05898	5.62242	5.8608	5.98378	6.39344	8.45739	8.97807	9.45973	6.18478	5.53848	5.29887	6.0614	5.77982	6.39296	6.19964	5.73572	5.86193	8.69275	8.21023	8.75329	0.365511	0.072333	-0.600368	-0.124045	-0.279162	0.770542	0.041536	0.517627	0.4942	2.27195	2.91909	3.8373	0.014868	0.197236	0.563059	2.63135	2.43041	2.36032	-0.026668	-0.320391	0.068859	0.359396	-0.488677	-1.47698
13369973	AT1G19250	4.66197	5.6159	4.85433	5.22194	5.17384	4.60368	5.44096	6.09611	6.90316	4.92452	8.35194	9.94892	7.9173	8.18992	7.50605	8.12506	7.64038	9.26207	8.9897	8.9934	8.62522	9.27121	9.79995	10.603	3.25532	2.57402	2.65172	2.90313	2.46654	4.65838	0.778983	0.480211	2.04883	-0.297423	3.1781	5.34523	1.0724	0.803485	1.11917	1.14614	2.15957	1.34096	0.29342	0.323274	-0.929664	1.44356	-1.01853	-4.00427
13370096	AT1G19640	6.71334	4.52411	5.13556	5.99902	7.03264	7.46976	6.3879	5.33662	5.02707	7.55247	8.73747	9.20491	6.04362	4.60259	4.25503	4.83625	5.97865	6.52555	6.44136	4.52758	5.05996	5.9446	7.70731	8.3677	-0.669719	0.078481	-0.880526	-1.16276	-1.05399	-0.944215	-0.325443	0.812513	-0.108494	1.55345	1.70483	1.73514	0.397739	-0.075014	0.804924	1.10835	1.72865	1.84215	0.723182	-0.887527	0.913418	-0.445103	0.023822	0.107005
13370843	AT1G21390	5.94333	5.36226	5.54431	5.80373	5.26747	5.60015	5.48142	5.67472	5.75317	5.759	5.77337	6.97991	5.36349	5.54682	5.68269	5.99455	5.79871	6.03123	5.73238	5.71308	6.28577	6.23778	6.45195	6.9574	-0.579839	0.184561	0.138376	0.190816	0.531242	0.43108	-0.461912	0.312461	0.208862	-0.044736	0.505907	1.37976	0.368891	0.166255	0.603081	0.24323	0.653245	0.926174	0.830803	-0.146206	0.394219	0.287966	0.147338	-0.453589
13371259	AT1G22400	7.58271	6.6544	6.79342	6.95524	6.40983	5.57059	7.54375	7.24955	7.217	7.68693	6.89956	7.87672	7.02495	5.83821	5.99759	6.6459	5.44928	6.18777	7.68575	6.74834	6.50365	7.63303	6.48038	7.30466	-0.557754	-0.816193	-0.795836	-0.309344	-0.960557	0.617174	-0.038962	0.595145	0.423574	0.731689	0.489727	2.30613	0.660801	0.910128	0.506059	0.987126	1.0311	1.11689	0.699763	0.314983	0.082485	0.255437	0.541376	-1.18923
13372326	AT1G25400	9.24307	7.91215	8.68471	8.28107	7.51767	5.67762	9.16687	8.29218	8.29892	8.85793	7.46936	8.03273	9.22938	8.21974	8.80583	8.8337	7.10872	6.43501	9.48131	8.59931	8.4343	9.38003	7.19893	7.38406	-0.013698	0.307595	0.121116	0.552631	-0.408946	0.757393	-0.076201	0.380035	-0.385789	0.576865	-0.048307	2.35512	0.251931	0.37957	-0.37153	0.546331	0.090214	0.949048	0.328132	-0.000465	0.014259	-0.030534	0.138521	-1.40607
13373034	AT1G27730	8.98517	7.9527	8.99665	8.25679	6.49914	5.96572	9.0937	8.51862	8.36451	9.25209	6.78499	8.07722	9.27689	8.57525	9.03685	8.23924	6.96596	7.26741	9.69039	9.08729	8.37607	9.37899	7.66205	8.36047	0.291725	0.622549	0.040204	-0.017549	0.466824	1.30169	0.108533	0.565924	-0.632143	0.995301	0.285854	2.1115	0.413503	0.512042	-0.66078	1.13974	0.696089	1.09306	0.30497	-0.053882	-0.028637	0.144441	0.410235	-1.01844
13373203	AT1G28190	8.19947	8.11791	7.98905	7.49035	6.77565	6.72867	8.6759	8.45958	8.14854	7.88473	7.5589	7.95782	8.83564	8.04653	7.94031	8.01279	7.2738	7.63569	9.59066	9.07825	8.1798	8.78717	8.14712	8.58971	0.636174	-0.071381	-0.048744	0.522435	0.498151	0.907024	0.476432	0.341669	0.159483	0.394379	0.783256	1.22915	0.755011	1.03172	0.239493	0.774386	0.873323	0.95402	0.278579	0.69005	0.08001	0.380007	0.090067	-0.275133
13373342	AT1G28480	3.72133	3.75615	3.89836	3.63578	4.16791	4.24476	3.63325	3.76333	5.60147	5.39449	7.07765	7.52182	5.00826	5.75002	6.34711	6.15459	6.10188	6.23863	5.99537	6.36299	6.66352	7.00085	7.14787	7.03468	1.28694	1.99387	2.44875	2.51881	1.93397	1.99386	-0.088073	0.007187	1.70311	1.75871	2.90974	3.27706	0.987106	0.612973	0.316418	0.846262	1.04599	0.796054	1.07518	0.605786	-1.38669	-0.912446	-1.86375	-2.48101
13374839	AT1G32350	5.19628	5.37453	4.90649	4.78418	5.10256	4.32338	6.17926	6.11326	6.43433	5.54084	6.2023	8.21188	7.84284	7.38048	6.6146	6.6545	6.57704	7.53757	9.02018	8.40305	7.38239	7.79608	7.14635	9.38595	2.64657	2.00595	1.70811	1.87032	1.47449	3.21419	0.982986	0.738726	1.52784	0.756666	1.09975	3.8885	1.17734	1.02256	0.767797	1.14159	0.569312	1.84838	0.194354	0.283839	-0.76004	0.38492	-0.530434	-2.04012
13374940	AT1G32640	7.07643	7.22022	7.6421	6.85489	7.39335	7.62014	7.04598	7.37506	8.00885	8.0458	8.64913	9.14503	6.86668	6.96987	7.58981	7.21782	7.72379	8.02017	7.65723	7.75219	7.77994	8.34889	8.65494	9.00362	-0.209745	-0.25035	-0.052293	0.362921	0.330439	0.400029	-0.030445	0.154847	0.366747	1.1909	1.25578	1.52489	0.790544	0.78232	0.190136	1.13107	0.931148	0.983451	0.820989	0.627473	-0.176611	-0.059832	-0.324637	-0.541439
13376292	AT1G44350	7.37309	7.85937	8.08784	7.41586	7.79229	7.32351	7.57691	7.86296	8.13289	8.17624	9.13611	9.76382	7.12172	7.48082	7.87917	7.1756	7.10158	7.37924	7.17694	7.39923	7.57883	8.08942	8.38337	9.25017	-0.251372	-0.378541	-0.20867	-0.240258	-0.690707	0.055734	0.203823	0.003593	0.04505	0.760385	1.34382	2.44032	0.055225	-0.08159	-0.300348	0.913821	1.28178	1.87093	-0.148598	-0.085183	-0.345398	0.153436	-0.062038	-0.569386
13378412	AT1G51890	7.84586	6.8351	5.87589	7.02628	6.30036	5.58265	8.07503	7.96012	7.88603	7.1749	7.58325	7.7411	8.55055	7.63783	7.60305	7.4975	7.4358	7.37065	9.11403	8.64039	8.11536	8.10384	7.74651	8.20568	0.704685	0.80273	1.72716	0.47122	1.13544	1.788	0.229169	1.12502	2.01014	0.148614	1.28289	2.15844	0.563476	1.00256	0.512316	0.60634	0.310705	0.835031	0.334307	-0.122459	-1.49783	0.457726	-0.972189	-1.32341
13378490	AT1G52030	7.51744	6.54781	7.16398	7.0874	7.65215	7.16849	7.3986	6.70051	6.93598	7.58686	8.98786	9.232	6.1452	5.68372	5.70664	5.8108	6.90383	6.66313	5.77011	5.47985	5.82256	7.47394	7.98398	8.33863	-1.37224	-0.864084	-1.45734	-1.2766	-0.748319	-0.505352	-0.118836	0.152702	-0.228006	0.499459	1.33572	2.06352	-0.375087	-0.203874	0.115911	1.66314	1.08015	1.6755	-0.256251	-0.356576	0.343917	1.16368	-0.255567	-0.38802
13378498	AT1G52040	8.15758	7.25404	8.04563	7.92374	8.92558	9.59188	8.46589	7.0818	7.91731	8.69175	10.0478	10.8437	4.64675	4.31245	4.47085	4.41754	4.72517	5.79322	4.52795	4.33728	3.94733	6.10548	6.88022	9.60058	-3.51082	-2.94159	-3.57478	-3.50619	-4.20041	-3.79866	0.308309	-0.172236	-0.128322	0.76801	1.12219	1.25184	-0.118801	0.024831	-0.523516	1.68794	2.15505	3.80735	-0.42711	0.197067	-0.395194	0.91993	1.03286	2.55551
13378857	AT1G52890	5.79756	6.25838	6.59356	5.18463	5.91861	6.7142	6.63446	6.72369	6.54521	5.92272	7.34782	9.55929	6.01731	6.79168	7.16981	5.18879	5.88921	6.94187	7.65754	7.59228	7.25324	7.14661	7.12512	9.54218	0.219743	0.5333	0.576254	0.004164	-0.029409	0.227669	0.836894	0.465306	-0.048349	0.738095	1.4292	2.84509	1.64024	0.8006	0.083431	1.95782	1.23592	2.60031	0.803343	0.335294	0.13178	1.21973	-0.193286	-0.244774
13378862	AT1G52900	3.81711	3.62192	3.02584	3.21681	3.34899	3.6463	3.70563	3.52767	3.43384	3.32991	4.17344	6.26538	3.98166	3.77791	3.49977	3.84657	3.31494	4.1604	4.16096	3.98225	3.37751	3.76827	5.12193	5.86095	0.164549	0.155987	0.473931	0.629755	-0.03405	0.514107	-0.111488	-0.094252	0.408008	0.1131	0.824443	2.61908	0.179296	0.204343	-0.122262	-0.078292	1.80699	1.70054	0.290784	0.298595	-0.53027	-0.191392	0.982543	-0.918535
13383656	AT1G65690	6.44412	5.82666	5.65905	5.60338	6.04523	6.2611	6.52581	6.64637	7.13779	6.30872	6.81929	7.84025	7.26425	7.38101	7.35241	6.92406	7.36785	7.80936	8.07739	8.04496	7.24096	7.46469	8.09703	8.82428	0.82013	1.55435	1.69336	1.32068	1.32262	1.54826	0.081689	0.819712	1.47874	0.705345	0.77406	1.57915	0.813141	0.663956	-0.111457	0.540634	0.729186	1.01492	0.731452	-0.155756	-1.5902	-0.164711	-0.044874	-0.564223
13386757	AT1G73260	5.46674	5.65529	5.31039	6.06025	5.63708	4.76758	5.61538	5.92601	7.1977	4.91	5.91258	9.42152	6.61723	7.80968	7.68887	7.18101	7.66113	7.41421	6.80561	8.33297	8.24319	7.61146	7.56506	9.13983	1.15049	2.15439	2.37847	1.12076	2.02405	2.64663	0.148647	0.270723	1.8873	-1.15025	0.2755	4.65395	0.188387	0.523297	0.554328	0.430447	-0.096065	1.72562	0.03974	0.252574	-1.33298	1.5807	-0.371565	-2.92833
13389720	AT1G79680	6.03665	5.70313	5.75156	5.28286	5.02983	4.63033	6.91205	6.65659	6.32501	6.29187	6.28895	7.51993	6.97499	6.60754	6.21665	6.40218	5.54056	6.05757	7.72416	6.93295	6.64316	7.4177	6.22719	7.394	0.938339	0.904409	0.465089	1.11933	0.510727	1.42725	0.8754	0.953467	0.573448	1.00901	1.25912	2.8896	0.749173	0.325416	0.426506	1.01551	0.686633	1.33642	-0.126227	-0.628051	-0.146942	0.0065	-0.572486	-1.55318
13392784	AT2G13810	4.96739	4.12887	4.0739	3.72885	3.81932	4.08502	4.81897	4.37141	6.19606	3.62824	7.01314	9.40425	6.72045	7.62293	6.33659	6.8485	7.28668	9.52737	8.26456	8.50676	7.5627	8.02012	9.40242	10.7758	1.75306	3.49406	2.26269	3.11965	3.46736	5.44235	-0.148422	0.242546	2.12217	-0.100611	3.19382	5.31923	1.54411	0.883832	1.22611	1.17162	2.11574	1.24845	1.69253	0.641286	-0.896058	1.27223	-1.07808	-4.07077
13396292	AT2G23270	5.07486	4.60933	5.01523	4.65687	5.12093	4.46703	5.63163	5.57069	5.27171	5.81309	4.93552	5.74657	7.3289	6.11765	5.33869	6.05197	5.54278	5.66794	8.20857	7.30459	5.51531	7.53445	5.5331	6.7948	2.25404	1.50832	0.323459	1.3951	0.42185	1.20091	0.556763	0.961356	0.256479	1.15622	-0.18541	1.27954	0.879666	1.18694	0.176621	1.48248	-0.009683	1.12685	0.322903	0.225586	-0.079858	0.326265	0.175727	-0.152682
13396571	AT2G24210	3.43387	2.8174	2.7071	2.96957	3.1247	2.73651	2.95806	3.02427	2.89558	2.98166	4.35401	6.34332	3.10884	3.02975	2.92281	3.06659	2.89043	3.27602	3.01284	3.05581	2.86537	3.10743	3.24223	5.62317	-0.325032	0.212342	0.21571	0.097028	-0.234268	0.539506	-0.475809	0.206867	0.188471	0.012091	1.22931	3.60681	-0.095998	0.026069	-0.057444	0.040832	0.351798	2.34715	0.379811	-0.180798	-0.245915	0.028741	-0.877511	-1.25965
13398584	AT2G29350	3.40038	3.2165	3.37649	2.80613	3.22269	4.2146	3.81535	3.52597	4.62599	2.91466	5.00332	8.02586	4.98662	4.47277	5.00207	5.3879	5.57923	7.0805	6.2676	5.81658	5.55368	5.83222	7.14735	8.92486	1.58624	1.25628	1.62558	2.58178	2.35654	2.8659	0.414965	0.309469	1.2495	0.108537	1.78063	3.81125	1.28097	1.34381	0.551601	0.444316	1.56812	1.84436	0.86601	1.03434	-0.697895	0.335779	-0.21251	-1.96689
13399525	AT2G31945	4.04226	4.45436	4.24424	3.63375	4.25597	3.41399	4.36294	4.58324	4.60033	4.2448	3.56204	4.79882	5.38257	5.50717	5.55405	5.10518	5.15193	4.39616	6.5555	6.50975	5.79984	6.09596	4.77234	6.0098	1.34031	1.05281	1.30981	1.47143	0.895964	0.982177	0.320681	0.128874	0.356093	0.611052	-0.693925	1.38483	1.17293	1.00258	0.245787	0.990776	-0.379588	1.61364	0.852251	0.873703	-0.110306	0.379724	0.314337	0.228808
13400703	AT2G34600	4.93476	5.24648	4.82805	4.81892	4.93179	4.07982	5.19772	5.21879	5.24093	5.59427	5.70262	6.13966	4.95416	5.09832	4.80411	5.12569	4.37516	4.85705	5.16935	4.55028	5.36176	5.88469	5.61767	5.92203	0.019406	-0.148158	-0.023934	0.306772	-0.55663	0.777236	0.262958	-0.027688	0.412883	0.775344	0.770831	2.05984	0.215189	-0.548046	0.55765	0.758995	1.24251	1.06498	-0.047769	-0.520358	0.144767	-0.016349	0.471679	-0.994859
13400810	AT2G34810	8.27139	8.3526	8.73844	8.426	9.20012	9.12156	8.31996	8.25571	9.062	8.54807	10.1144	10.9191	8.13306	8.7463	8.77645	7.92295	8.77732	9.48471	8.37327	8.61593	9.22164	8.7283	10.1708	10.9005	-0.138329	0.393699	0.038011	-0.503057	-0.422803	0.363152	0.048574	-0.09689	0.323556	0.122068	0.914277	1.79752	0.240213	-0.130373	0.445184	0.805355	1.39352	1.41582	0.191639	-0.033483	0.121628	0.683287	0.479243	-0.381702
13401341	AT2G35980	6.32216	5.61547	4.92994	5.20055	5.0075	4.28503	7.3672	6.51398	7.04648	6.0586	6.16193	7.46484	8.96099	7.46699	6.86702	8.01273	7.17554	8.07783	9.75128	8.99821	7.85014	8.53488	7.94561	9.37543	2.63883	1.85152	1.93708	2.81217	2.16804	3.7928	1.04504	0.898507	2.11654	0.858044	1.15444	3.17981	0.790294	1.53122	0.983117	0.522152	0.77007	1.2976	-0.254748	0.632711	-1.13342	-0.335892	-0.384365	-1.88221
13402643	AT2G39030	7.18673	7.08132	7.60875	6.94527	8.22568	7.70453	7.57362	7.97549	8.28642	8.75288	11.215	12.1381	5.43866	6.06832	5.65497	4.95851	5.77763	8.2758	6.91105	6.62834	6.57897	8.85166	10.9216	11.6187	-1.74807	-1.013	-1.95379	-1.98676	-2.44804	0.571276	0.386892	0.894164	0.67767	1.80761	2.9893	4.43357	1.47239	0.560016	0.924009	3.89315	5.14395	3.34285	1.0855	-0.334148	0.246339	2.08554	2.15464	-1.09073
13404541	AT2G43510	8.45913	8.67573	9.05497	8.7026	9.11158	8.63424	8.37822	9.13927	9.47012	9.04991	9.92911	10.9208	7.83731	8.47444	8.86403	8.63047	8.90445	8.85055	8.5213	8.90707	9.34778	9.23219	9.94339	11.0354	-0.621816	-0.201286	-0.190938	-0.07213	-0.207134	0.21631	-0.080913	0.463537	0.415148	0.347315	0.817527	2.28655	0.683985	0.432626	0.48375	0.601728	1.03895	2.18481	0.764898	-0.030911	0.068602	0.254413	0.221418	-0.10174
13404550	AT2G43530	7.98792	8.27785	9.39459	8.36051	8.76551	8.8305	8.31153	8.08287	9.24974	9.32831	9.66737	10.4637	4.86376	4.49273	5.68635	5.31208	5.30218	5.8351	4.7237	5.14383	5.49204	5.28415	6.06311	7.27029	-3.12416	-3.78512	-3.70824	-3.04843	-3.46333	-2.9954	0.323609	-0.194977	-0.144853	0.967799	0.901861	1.63321	-0.140061	0.651096	-0.194305	-0.02793	0.760931	1.43519	-0.46367	0.846073	-0.049452	-0.995729	-0.14093	-0.198023
13406076	AT2G47190	4.73431	4.76985	5.23684	4.70855	5.64999	5.56085	5.65025	5.46458	5.63865	4.78522	6.26061	7.47677	6.10525	6.07192	6.54868	5.12218	6.10264	5.86919	6.71834	7.24462	7.02286	5.87687	5.96141	7.6444	1.37094	1.30207	1.31184	0.413633	0.452645	0.308345	0.91594	0.694732	0.401811	0.076666	0.610625	1.91593	0.613088	1.1727	0.474183	0.754686	-0.141225	1.7752	-0.302852	0.477965	0.072372	0.67802	-0.75185	-0.140723
13408088	AT2G06050	6.22379	6.58104	6.78665	6.39471	6.8661	6.79167	6.6263	6.7237	7.33923	7.28617	8.0423	8.40494	7.51725	7.37183	7.55324	6.73114	7.18386	7.55507	8.07264	7.80014	7.42236	8.2134	8.17278	8.57829	1.29345	0.790787	0.76659	0.336428	0.317757	0.7634	0.402504	0.142654	0.552582	0.891459	1.1762	1.61327	0.555398	0.428308	-0.130873	1.48226	0.988921	1.02322	0.152894	0.285654	-0.683455	0.590798	-0.187277	-0.590049
13411796	AT2G22810	8.07239	7.88294	7.18787	7.80203	8.61974	7.82549	7.82987	7.13289	6.56605	7.45751	7.40656	5.44772	7.42687	8.05485	7.24058	6.76621	7.79023	5.81619	6.83737	6.58264	6.65807	5.68392	6.57484	4.7329	-0.645521	0.171909	0.052715	-1.03582	-0.82951	-2.00929	-0.242522	-0.750049	-0.621816	-0.344519	-1.21318	-2.37777	-0.589502	-1.4722	-0.582515	-1.08228	-1.21539	-1.08329	-0.34698	-0.722152	0.039301	-0.737766	-0.002212	1.29448
13412564	AT2G24850	5.95355	5.58815	5.79136	6.27228	6.74879	6.94033	6.04627	5.9272	6.61818	8.38726	10.6113	11.0916	6.35613	5.7165	5.75076	7.8876	7.63336	9.62445	7.42993	6.09539	6.76727	9.57718	10.5119	10.5106	0.402585	0.128344	-0.040599	1.61532	0.884565	2.68412	0.092722	0.339047	0.826825	2.11498	3.86254	4.15127	1.0738	0.378894	1.01651	1.68958	2.87855	0.88615	0.981079	0.039847	0.189688	-0.425401	-0.983985	-3.26512
13413221	AT2G26400	6.77918	6.4938	5.81412	5.4698	5.51634	6.37425	5.7465	5.66454	6.62347	5.0351	9.03911	10.1022	7.13085	6.21751	7.48543	7.93861	8.05614	8.75152	7.24648	7.04981	7.73085	8.02242	9.2195	9.73811	0.351665	-0.276281	1.67131	2.46881	2.53981	2.37726	-1.03269	-0.829258	0.809347	-0.434692	3.52278	3.72795	0.115633	0.832292	0.245415	0.083811	1.16336	0.98659	1.14832	1.66155	-0.563932	0.518503	-2.35942	-2.74136
13413277	AT2G26530	7.95357	7.52548	7.94551	7.50136	7.89518	6.77072	8.13055	7.89518	7.53545	8.1756	8.15453	8.04539	7.35188	6.96707	7.03922	6.8909	7.0202	7.249	7.99875	7.1751	7.1853	8.18897	7.85795	8.08707	-0.601692	-0.558418	-0.906297	-0.610461	-0.874986	0.478276	0.176976	0.369697	-0.410064	0.674237	0.259354	1.27467	0.646874	0.208037	0.14609	1.29807	0.837753	0.838074	0.469898	-0.16166	0.556154	0.623833	0.578399	-0.436597
13415110	AT2G30750	2.38199	2.51986	2.18807	2.32846	2.24176	2.13449	2.98616	2.81075	4.27025	3.26757	3.07584	3.48624	3.55818	2.98669	2.57949	2.51964	2.37095	2.11087	4.73882	4.37907	3.70771	4.57683	3.12837	2.92215	1.17619	0.466825	0.391424	0.19118	0.129196	-0.023615	0.604161	0.290889	2.08218	0.93911	0.834078	1.35175	1.18064	1.39239	1.12822	2.05719	0.757417	0.81128	0.576476	1.1015	-0.953961	1.11808	-0.076661	-0.540469
13415120	AT2G30770	6.1217	5.91147	6.43037	7.81929	8.0192	5.28921	5.93309	5.65344	7.0782	8.0192	8.1693	8.9093	8.27726	8.49074	7.70072	8.5138	8.21691	9.33354	9.56143	9.24186	8.48333	8.66059	8.93571	10.1288	2.15556	2.57927	1.27035	0.694513	0.197703	4.04433	-0.188618	-0.25803	0.647825	0.199916	0.150094	3.62008	1.28417	0.751127	0.782609	0.146791	0.718805	0.795272	1.47279	1.00916	0.134784	-0.053125	0.568711	-2.82481
13421761	AT2G45760	2.37948	2.13436	2.27698	2.30318	2.19158	2.31788	2.25232	2.15909	2.27698	2.26287	3.7573	4.82533	4.71843	3.72396	2.83022	4.08423	3.80956	4.84188	5.60198	4.44577	2.94513	4.62029	4.65133	5.80937	2.33894	1.5896	0.55324	1.78105	1.61797	2.524	-0.127166	0.024727	7e-06	-0.040312	1.56571	2.50744	0.883547	0.721809	0.114916	0.536059	0.841774	0.96749	1.01071	0.697082	0.114909	0.576371	-0.723937	-1.53995
13426859	AT3G11480	2.97537	2.96045	3.03002	3.286	2.89122	2.99568	3.29356	2.91037	3.07502	4.1212	6.87457	8.52447	3.41845	3.37677	3.00453	2.99335	3.19677	3.05062	3.36406	2.97569	3.53638	4.44154	4.51191	6.65046	0.443084	0.416318	-0.025493	-0.292644	0.305548	0.054937	0.318188	-0.050082	0.044998	0.835201	3.98335	5.52879	-0.05439	-0.40108	0.531846	1.44819	1.31515	3.59984	-0.372578	-0.350998	0.486848	0.612989	-2.6682	-1.92895
13427922	AT3G13950	7.28941	7.0013	6.22866	6.06732	6.51438	6.91398	7.74119	7.53155	8.02828	7.33652	8.55047	9.65261	8.07394	7.69765	7.81536	7.56975	7.85823	8.6844	8.99287	8.7047	8.1457	8.17404	8.8608	9.59618	0.784531	0.696352	1.5867	1.50243	1.34386	1.77042	0.451782	0.530255	1.79962	1.26921	2.0361	2.73863	0.918934	1.00705	0.330342	0.604288	1.00256	0.911779	0.467152	0.476798	-1.46928	-0.66492	-1.03353	-1.82685
13428695	AT3G15500	6.10445	5.53094	5.03512	3.68171	4.9612	4.35	5.97366	6.36951	5.86254	4.68056	4.80176	6.57412	6.38732	6.15154	5.69817	4.80263	4.9344	4.9498	7.31455	7.22057	5.98113	6.1372	4.65573	6.03479	0.282876	0.620599	0.66306	1.12092	-0.026801	0.599803	-0.130788	0.838569	0.82743	0.998852	-0.159435	2.22412	0.927228	1.06903	0.282955	1.33457	-0.278665	1.08499	1.05802	0.23046	-0.544475	0.33572	-0.11923	-1.13913
13430792	AT3G19970	6.49488	5.91757	5.92601	6.85151	6.71112	6.75438	6.1531	5.99608	6.20207	7.25731	7.1549	8.0924	6.78694	6.21469	6.56755	7.11791	6.98631	7.47006	6.99499	6.29695	6.29295	8.21521	7.58819	8.49954	0.29206	0.297123	0.641531	0.266406	0.275192	0.71568	-0.341779	0.07851	0.276054	0.4058	0.443778	1.33802	0.208051	0.082256	-0.274596	1.0973	0.601882	1.02948	0.54983	0.003746	-0.55065	0.691498	0.158104	-0.308542
13433243	AT3G25760	7.74462	7.30105	6.91	6.70758	8.19316	8.14892	8.10212	7.72416	7.85789	8.0672	9.03364	9.30235	8.51477	7.89603	7.15604	7.0463	7.89682	8.17435	9.03053	8.46707	8.19456	8.5139	8.95619	9.36868	0.770145	0.594985	0.246038	0.33872	-0.296341	0.025431	0.357499	0.423115	0.947888	1.35962	0.840472	1.15343	0.515756	0.571036	1.03851	1.46761	1.05936	1.19433	0.158257	0.147921	0.090625	0.107986	0.218891	0.040901
13433253	AT3G25780	5.06926	4.84291	4.62237	5.13774	4.77372	4.72214	5.39703	5.37221	5.51443	6.03433	6.34634	7.21058	6.43135	6.09926	6.19466	5.95974	5.86103	6.6018	7.39818	6.63918	6.54141	7.34551	7.45485	7.91495	1.36208	1.25635	1.57229	0.821992	1.0873	1.87966	0.32777	0.529298	0.892066	0.896591	1.57262	2.48843	0.966833	0.539922	0.346755	1.38577	1.59382	1.31316	0.639063	0.010624	-0.545311	0.489181	0.021199	-1.17528
13434244	AT3G28210	4.96026	4.62073	4.94334	3.58772	3.92988	3.92217	5.54165	4.51797	4.52577	4.12216	3.99752	5.59114	5.85573	4.37808	4.56533	4.4479	3.79812	4.83098	6.69052	5.82578	4.74867	4.53725	4.71513	6.06517	0.895469	-0.242658	-0.378009	0.860183	-0.131762	0.908812	0.581386	-0.10276	-0.417564	0.534442	0.067639	1.66897	0.834785	1.4477	0.18334	0.089349	0.917009	1.23419	0.253399	1.55046	0.600904	-0.445093	0.84937	-0.434773
13434325	AT3G28580	5.50108	4.574	4.32225	4.44551	4.70628	5.05176	4.96733	4.64329	5.43919	6.12225	6.34486	7.76225	7.42495	6.40516	6.50247	7.38101	5.93446	7.02008	7.59564	7.31817	6.38793	8.36441	7.19456	7.92657	1.92388	1.83115	2.18022	2.9355	1.22818	1.96832	-0.533745	0.069282	1.11695	1.67674	1.63858	2.71049	0.17069	0.913013	-0.114538	0.983393	1.2601	0.90649	0.704435	0.843731	-1.23149	-0.693347	-0.378481	-1.804
13435079	AT3G43250	3.42884	3.2054	3.00127	3.1437	3.28066	3.13236	3.6533	3.56731	4.06507	4.06925	4.5433	5.6758	3.52304	3.44683	3.37365	3.80902	3.07234	3.38307	4.62455	3.46617	3.52922	5.90437	4.03973	4.52011	0.094195	0.241436	0.372387	0.665317	-0.208322	0.25071	0.224464	0.361917	1.06381	0.925553	1.26264	2.54344	1.10151	0.019336	0.155564	2.09536	0.967394	1.13704	0.877046	-0.342581	-0.908244	1.16981	-0.295248	-1.4064
13435379	AT3G44300	5.92924	5.96454	4.03581	6.11891	6.14218	6.01636	5.9291	5.67986	6.33927	5.62985	6.8177	9.22009	5.12149	4.7001	4.7084	6.0529	7.25304	6.5872	5.85877	5.72508	5.44976	6.52924	5.86194	8.88231	-0.807747	-1.26444	0.672588	-0.066015	1.11086	0.570839	-0.000146	-0.284683	2.30346	-0.489062	0.675525	3.20373	0.737277	1.02498	0.741362	0.476345	-1.3911	2.2951	0.737423	1.30966	-1.5621	0.965407	-2.06663	-0.908627
13437483	AT3G49620	6.47827	5.80317	6.18425	6.28583	5.39691	4.56486	6.62877	6.58107	7.07265	6.92894	5.43082	5.97694	5.76693	4.7638	4.03122	4.49526	4.6807	3.926	6.55549	5.80557	4.86097	6.56052	4.51197	6.29215	-0.711336	-1.03936	-2.15303	-1.79057	-0.716212	-0.638857	0.150498	0.777907	0.888393	0.643111	0.033909	1.41208	0.788561	1.04177	0.829746	2.06526	-0.168734	2.36614	0.638063	0.263862	-0.058647	1.42215	-0.202643	0.954066
13437652	AT3G50260	8.30811	7.3229	6.54555	6.62911	6.1931	5.01057	8.43271	7.8832	7.42156	7.28465	6.8631	7.47129	7.55299	7.31855	7.14568	6.86395	6.14918	6.42377	8.06095	8.02199	7.57721	7.36785	7.17896	7.58875	-0.755122	-0.004348	0.600126	0.234839	-0.043919	1.41319	0.124593	0.560306	0.876008	0.65554	0.67	2.46071	0.507955	0.703443	0.431531	0.503904	1.02977	1.16498	0.383362	0.143137	-0.444477	-0.151636	0.359773	-1.29574
13438085	AT3G51450	6.97179	6.22025	6.07058	5.39147	6.9698	7.3987	7.13046	6.56817	7.1147	6.73007	8.93441	9.57911	7.47537	7.18875	7.45861	6.69645	7.71871	8.57922	8.19368	7.94655	8.01443	8.08408	9.29833	9.35983	0.503578	0.9685	1.38803	1.30499	0.748918	1.18051	0.158667	0.347924	1.04411	1.33861	1.96462	2.18041	0.718309	0.757803	0.555811	1.38763	1.57961	0.78061	0.559642	0.409879	-0.488303	0.04902	-0.385006	-1.3998
13443268	AT3G01420	3.83191	4.04699	4.3355	3.93537	3.97164	4.06073	4.10758	3.88856	4.52496	4.07732	4.54984	7.14995	4.23698	4.84627	4.33757	4.42025	5.30089	4.62818	5.09108	4.33409	4.71934	5.42514	4.39691	8.3251	0.405074	0.799277	0.002069	0.484887	1.32925	0.567445	0.275672	-0.158426	0.189463	0.141954	0.578197	3.08922	0.854098	-0.512179	0.381774	1.00489	-0.903976	3.69692	0.578426	-0.353753	0.192311	0.862932	-1.48217	0.6077
13448724	AT3G13100	6.04969	5.61763	5.17642	5.76759	5.55777	5.84771	5.79683	5.40663	5.96074	5.39412	6.82473	7.81351	7.63256	6.65196	6.49833	7.16578	7.22748	7.44724	7.88634	7.242	6.51846	7.70319	7.63903	8.30841	1.58287	1.03433	1.32191	1.39819	1.66971	1.59952	-0.252858	-0.211003	0.784324	-0.373473	1.26696	1.9658	0.253781	0.590038	0.020128	0.537411	0.411548	0.861176	0.506639	0.801041	-0.764196	0.910884	-0.855415	-1.10462
13451052	AT3G18830	8.10157	7.7352	7.64398	8.10613	7.86753	7.457	8.40858	8.15406	8.04474	8.31909	8.15905	8.62939	8.56899	8.70919	8.62349	8.65346	8.19741	8.46991	9.11666	9.0074	8.94533	8.89956	8.79819	9.22152	0.467429	0.973989	0.979509	0.547331	0.329878	1.01292	0.307017	0.418862	0.400758	0.212957	0.291518	1.1724	0.547661	0.298217	0.321842	0.246099	0.600776	0.751609	0.240644	-0.120645	-0.078916	0.033142	0.309258	-0.420788
13452744	AT3G22910	5.91887	6.10435	5.77077	5.61514	5.54699	5.9196	5.62318	6.33762	5.89582	5.34988	7.25254	8.42667	6.28845	6.30851	6.16899	6.40451	6.49141	7.86461	6.7439	6.58553	6.17916	6.01798	7.8374	8.95688	0.369578	0.204162	0.398224	0.789367	0.944426	1.94501	-0.295689	0.233273	0.125048	-0.26526	1.70555	2.50707	0.455454	0.277017	0.010167	-0.386529	1.34599	1.09226	0.751143	0.043744	-0.114881	-0.121269	-0.359566	-1.41481
13457589	AT3G48850	4.13841	4.59682	3.98314	4.16325	4.46567	4.16916	5.41107	5.57958	5.43768	4.48201	5.66424	7.02393	7.18882	7.28423	6.12051	6.43409	6.2895	7.79258	8.60757	8.45038	7.53531	7.28637	7.28011	9.20052	3.05041	2.68741	2.13737	2.27084	1.82383	3.62342	1.27266	0.982763	1.45453	0.318764	1.19857	2.85476	1.41874	1.16615	1.4148	0.852281	0.990614	1.40794	0.146084	0.183391	-0.03974	0.533517	-0.207954	-1.44682
13459771	AT3G54150	6.5906	5.33063	4.91225	5.36735	4.41656	4.09703	6.77081	5.39041	6.04699	5.7987	5.26865	5.54286	7.34414	5.70314	5.16475	6.06184	4.85774	4.99874	7.75166	6.3412	5.83018	7.18265	5.17445	6.2728	0.753544	0.372506	0.252495	0.694482	0.44118	0.901707	0.180212	0.059772	1.13473	0.431342	0.852086	1.44582	0.407512	0.638062	0.665434	1.12082	0.316706	1.27406	0.2273	0.57829	-0.4693	0.689476	-0.53538	-0.171761
13461100	AT3G57260	3.31632	3.20778	3.21333	3.09703	3.22192	3.29445	3.23329	2.77721	3.23969	2.90954	3.91615	6.05036	3.21114	3.97289	3.69347	4.16972	4.21702	5.2522	3.955	3.35991	3.88672	3.2609	4.30579	4.41666	-0.105179	0.765116	0.480139	1.07269	0.995097	1.95775	-0.083037	-0.43057	0.026366	-0.187494	0.694226	2.75591	0.743852	-0.612985	0.193251	-0.908826	0.088772	-0.835549	0.826889	-0.182415	0.166885	-0.721332	-0.605454	-3.59146
13461191	AT3G57460	7.39123	5.61745	4.77289	5.27597	5.68068	6.22926	7.98059	6.09879	6.14907	7.24523	9.03514	9.70827	4.94392	4.40747	4.30643	4.96641	5.0391	5.1044	5.55525	4.81426	4.54772	6.24409	6.52676	6.31919	-2.44731	-1.20998	-0.466461	-0.309565	-0.641572	-1.12485	0.58936	0.481344	1.37618	1.96926	3.35447	3.47901	0.611331	0.406789	0.241287	1.27769	1.48766	1.21479	0.021971	-0.074555	-1.13489	-0.691571	-1.86681	-2.26423
13464261	AT4G01060	4.78156	5.1304	4.58845	4.81235	5.53207	6.60688	4.77828	4.7718	4.73702	4.84811	5.21971	5.09279	5.60164	6.03219	5.30819	5.2046	6.26257	6.34874	5.42234	5.90718	5.22882	5.3891	6.12569	5.2942	0.82008	0.901785	0.71974	0.392247	0.730508	-0.258144	-0.003283	-0.3586	0.14857	0.03576	-0.312352	-1.51409	-0.179295	-0.125007	-0.079366	0.184508	-0.13688	-1.05454	-0.176012	0.233593	-0.227936	0.148748	0.175472	0.45955
13469677	AT4G16740	3.18987	3.10823	3.30187	3.38365	2.50206	3.24176	3.10823	3.3016	4.03669	3.526	3.44002	6.04378	3.38918	3.31025	3.46451	3.60644	3.21963	3.31777	3.55343	3.55899	3.70675	3.66886	3.06131	4.67016	0.199312	0.202017	0.162639	0.222789	0.717568	0.076013	-0.081642	0.193369	0.734813	0.142352	0.937965	2.80203	0.164251	0.248742	0.242236	0.062417	-0.158316	1.35239	0.245893	0.055373	-0.492577	-0.079935	-1.09628	-1.44964
13469960	AT4G17500	6.8936	6.85373	7.3087	6.09394	6.44186	5.29278	7.4669	7.54857	7.29926	7.26772	6.1862	6.57202	7.83584	7.06214	7.00635	6.55692	6.39639	6.90334	8.49007	8.07268	7.43629	8.19086	6.80582	7.73762	0.942238	0.208412	-0.302356	0.462985	-0.045475	1.61056	0.573297	0.694845	-0.009441	1.17378	-0.25566	1.27924	0.654226	1.01054	0.429946	1.63393	0.40943	0.834274	0.080929	0.315691	0.439387	0.460155	0.66509	-0.444964
13471365	AT4G20860	8.83676	7.78638	7.51062	7.3267	7.9431	7.23519	9.33926	8.49112	8.2567	7.73452	8.4002	8.44464	5.9841	6.37258	5.21621	5.79986	6.02335	5.52256	6.41961	5.68552	5.2972	5.71762	5.86006	6.41452	-2.85265	-1.4138	-2.29441	-1.52685	-1.91975	-1.71263	0.502501	0.704742	0.746079	0.407814	0.457102	1.20945	0.435512	-0.687055	0.080996	-0.082234	-0.163289	0.891959	-0.066989	-1.3918	-0.665083	-0.490048	-0.620391	-0.317489
13474536	AT4G28085	5.46106	4.40278	4.93523	4.85049	4.27645	3.18603	5.10302	4.36631	4.66795	5.24901	4.67153	4.93974	4.23828	3.64869	3.60623	3.80911	2.95824	2.99562	4.25218	3.71483	3.60458	4.05746	2.9662	4.14615	-1.22278	-0.754093	-1.329	-1.04138	-1.31821	-0.190403	-0.358036	-0.036473	-0.267273	0.398518	0.395083	1.75372	0.013899	0.066145	-0.001649	0.248345	0.007956	1.15053	0.371935	0.102618	0.265624	-0.150173	-0.387127	-0.603189
13476200	AT4G31800	8.51105	7.532	7.70296	8.34644	6.68635	6.14647	8.43049	7.44887	8.62426	9.18936	8.64827	8.8621	8.60027	8.24764	8.70153	9.3242	7.76194	8.20351	8.51732	9.26889	9.00864	9.87876	9.20426	9.40943	0.089216	0.715639	0.998577	0.977757	1.07559	2.05705	-0.080563	-0.083129	0.921301	0.842911	1.96192	2.71563	-0.082952	1.02125	0.307104	0.554555	1.44232	1.20592	-0.002389	1.10438	-0.614197	-0.288356	-0.519598	-1.50971
13478980	AT4G37990	5.31705	5.00496	5.17311	4.72821	4.77553	4.16588	5.46503	5.71055	5.81589	5.04245	6.95665	8.92181	5.65341	5.51033	5.29382	5.36052	5.28202	5.92162	6.80249	5.95562	6.3971	5.77501	5.8775	8.91084	0.336358	0.50537	0.120718	0.632314	0.506486	1.75573	0.147975	0.705595	0.642786	0.314235	2.18111	4.75593	1.14908	0.445298	1.10328	0.414481	0.595485	2.98923	1.0011	-0.260297	0.460495	0.100246	-1.58563	-1.7667
13479663	AT4G39670	4.97701	4.44967	4.10293	4.25075	4.31434	3.98587	5.53106	4.65567	5.13592	4.86782	4.51757	5.64923	6.10867	5.28719	4.75328	5.4778	4.72146	4.91122	6.61027	5.62671	5.16422	6.0035	5.24719	6.21344	1.13166	0.837518	0.650352	1.22705	0.407117	0.92535	0.55405	0.205998	1.03299	0.617074	0.203228	1.66336	0.501604	0.339521	0.410939	0.525704	0.525733	1.30222	-0.052446	0.133523	-0.622052	-0.09137	0.322505	-0.361139
13479796	AT4G39950	6.89846	7.36003	8.12316	7.86324	8.38233	8.57167	7.23642	8.27203	8.6127	8.35225	9.34749	10.1073	8.29159	8.98035	8.35175	7.77673	8.01089	8.65998	9.38345	9.3575	8.84092	8.54846	8.98699	9.85136	1.39313	1.62032	0.228584	-0.086505	-0.371445	0.088307	0.337963	0.912002	0.489537	0.489015	0.965152	1.53563	1.09186	0.377147	0.489171	0.771733	0.976101	1.19138	0.7539	-0.534855	-0.000366	0.282718	0.010949	-0.344246
13482338	AT4G08770	7.70244	6.76724	5.98571	7.99265	6.73325	5.89083	8.36294	8.33795	8.32323	7.91774	7.82754	9.04329	8.84476	6.69473	6.16981	7.41505	6.63596	7.76799	9.07745	7.77798	7.04258	8.35132	7.75222	10.1142	1.14233	-0.072513	0.184092	-0.577595	-0.097292	1.87716	0.6605	1.57071	2.33752	-0.07491	1.09429	3.15246	0.232688	1.08326	0.872773	0.936269	1.11626	2.34625	-0.427812	-0.487459	-1.46475	1.01118	0.021973	-0.806212
13483250	AT4G11650	7.30309	8.23151	7.05861	7.57852	7.4226	6.86472	7.245	8.23195	8.73327	6.62429	7.23062	9.86962	6.24486	7.34311	7.99252	7.3181	7.76342	6.855	7.46296	7.47422	8.29417	7.68885	6.83867	10.7997	-1.05823	-0.888408	0.933911	-0.26042	0.340826	-0.009724	-0.058087	0.000439	1.67467	-0.954231	-0.191981	3.0049	1.2181	0.131109	0.30165	0.370747	-0.924754	3.94475	1.27618	0.13067	-1.37302	1.32498	-0.732773	0.939849
13484203	AT4G13820	4.79444	4.3496	4.58519	4.52112	4.46753	4.02294	4.33274	4.28551	5.05531	5.10911	4.5134	5.23299	5.0705	4.47245	4.77046	5.12508	5.04482	5.20875	4.56325	5.24517	4.57153	4.9951	4.85417	4.40479	0.276064	0.122852	0.185263	0.603958	0.577291	1.1858	-0.461696	-0.064094	0.470115	0.587987	0.045876	1.21005	-0.507253	0.772715	-0.198928	-0.129982	-0.190646	-0.803958	-0.045557	0.836809	-0.669043	-0.717969	-0.236522	-2.01401
13484573	AT4G14370	6.20649	5.89966	5.69747	5.28143	5.46155	4.89121	6.41955	5.76732	6.17652	5.98419	5.68068	6.29764	6.39816	6.05125	5.60729	5.63987	5.67013	5.94009	6.47691	6.50898	6.05063	6.25179	5.49637	6.82745	0.191667	0.151599	-0.090183	0.358437	0.208572	1.04888	0.213058	-0.132336	0.47905	0.70276	0.219122	1.40642	0.078752	0.457723	0.443337	0.611921	-0.173751	0.887364	-0.134306	0.590059	-0.035713	-0.090839	-0.392873	-0.519058
13485325	AT4G16260	6.41513	6.84597	6.87445	5.82418	6.07986	4.79319	6.55206	8.30397	8.66307	6.14509	6.6588	7.84108	6.46034	7.88326	7.19388	5.40639	6.45919	6.35481	7.34585	8.5659	7.97104	5.75036	6.23684	8.20799	0.045208	1.03729	0.319434	-0.41779	0.379327	1.56163	0.136932	1.45801	1.78862	0.320906	0.578934	3.04789	0.885512	0.682648	0.777159	0.343961	-0.222352	1.85318	0.74858	-0.775359	-1.01146	0.023055	-0.801286	-1.19471
13487005	AT4G19700	6.51758	6.13262	6.39825	5.83745	5.56843	4.43499	6.43217	6.26257	6.61547	6.34781	5.57142	5.67928	4.51375	4.19199	4.04199	4.66521	4.11783	3.61629	4.97205	4.63807	4.9699	4.42163	4.21524	4.42988	-2.00382	-1.94063	-2.35626	-1.17224	-1.4506	-0.818703	-0.085413	0.129952	0.217211	0.510363	0.002987	1.24428	0.458297	0.446087	0.927903	-0.243581	0.097412	0.813588	0.54371	0.316135	0.710692	-0.753944	0.094425	-0.430696
13487029	AT4G19810	8.77217	7.5012	6.83606	7.80593	6.58845	5.81899	8.68729	8.30832	8.01534	7.4628	6.13543	7.31352	8.41913	7.52476	6.70554	7.22523	6.54831	6.59354	8.17216	7.74749	7.34161	7.05013	5.96048	8.93568	-0.353036	0.023562	-0.13052	-0.580694	-0.04014	0.774558	-0.084878	0.807116	1.17928	-0.343127	-0.45302	1.49453	-0.246972	0.222729	0.636062	-0.175106	-0.58783	2.34214	-0.162094	-0.584387	-0.543217	0.168021	-0.13481	0.847602
13488230	AT4G22880	4.14513	3.08931	3.0716	4.60529	4.94545	8.1659	4.00131	3.12951	3.10463	5.3475	7.33436	9.8903	3.85465	3.27304	3.31666	3.36214	4.51285	5.80025	3.88817	3.06511	3.29158	3.70715	5.85091	6.72721	-0.290481	0.183729	0.245053	-1.24315	-0.432597	-2.36565	-0.143819	0.040205	0.033023	0.742218	2.38891	1.72441	0.033517	-0.207932	-0.025079	0.345011	1.33806	0.926963	0.177336	-0.248137	-0.058102	-0.397207	-1.05085	-0.797443
13488692	AT4G23680	4.90896	6.13777	6.45176	5.95142	6.84649	6.99875	4.48457	6.37406	7.64487	5.46442	7.78878	9.9891	5.91486	7.02858	7.45565	6.09619	8.43331	7.7842	5.94572	6.83663	7.93198	5.89765	8.45622	9.88573	1.0059	0.890809	1.00389	0.144765	1.58682	0.785452	-0.424393	0.236289	1.19311	-0.487005	0.942293	2.99036	0.030859	-0.191949	0.47633	-0.198538	0.022912	2.10153	0.455252	-0.428238	-0.716778	0.288467	-0.919381	-0.888823
13493553	AT4G34710	8.06983	7.52733	7.61396	7.85433	7.86334	8.01512	7.98889	7.81966	7.79883	7.8954	8.51813	9.58845	8.27811	7.7883	7.65779	8.08397	7.92658	7.95591	8.30536	7.87423	7.64612	8.11814	8.16353	9.10876	0.208279	0.260973	0.043832	0.229639	0.063243	-0.059212	-0.080941	0.29233	0.184874	0.041075	0.654795	1.57333	0.027251	0.085928	-0.011674	0.034174	0.236946	1.15285	0.108192	-0.206402	-0.196548	-0.006901	-0.417849	-0.420475
13494710	AT4G37290	5.27879	4.41853	4.67089	4.73684	4.80516	4.10494	5.88599	4.92788	5.34904	5.42294	5.19038	6.49861	5.35836	6.09941	5.29139	5.86279	5.06886	4.89217	6.97693	5.89095	4.80303	6.74605	5.30418	6.98833	0.079576	1.68088	0.620493	1.12595	0.263695	0.787225	0.607207	0.509348	0.678149	0.686099	0.385218	2.39366	1.61857	-0.208456	-0.488357	0.883257	0.235326	2.09616	1.01136	-0.717804	-1.16651	0.197158	-0.149892	-0.297502
13498037	AT5G05600	7.54392	7.2825	7.06614	6.63117	7.15055	6.44498	7.65443	7.82704	7.97536	8.11093	8.95585	9.45152	6.77606	6.47912	6.07553	6.13922	6.4094	6.77456	7.62826	7.07256	7.20289	8.0602	8.29645	8.64754	-0.767859	-0.803379	-0.990607	-0.491954	-0.741152	0.329584	0.110507	0.544534	0.909218	1.47976	1.8053	3.00654	0.852194	0.593435	1.12736	1.92098	1.88705	1.87298	0.741687	0.048901	0.218141	0.441216	0.081748	-1.13356
13499909	AT5G10300	5.44686	5.64884	6.12692	6.24645	6.48773	6.30517	5.62629	5.6585	6.21431	6.71306	7.34732	7.97695	6.27298	5.72448	6.83751	6.55364	6.84841	6.971	5.90684	6.47472	6.80654	7.43269	7.71388	7.81522	0.826115	0.075643	0.71059	0.307193	0.360677	0.665824	0.179425	0.009665	0.087391	0.466605	0.85958	1.67178	-0.366136	0.750245	-0.030971	0.879047	0.865466	0.844227	-0.545561	0.74058	-0.118362	0.412442	0.005886	-0.827553
13500911	AT5G13220	6.40216	5.85294	6.12518	6.2457	5.59637	5.38779	6.7022	6.40234	6.61501	7.23999	8.53575	9.35294	7.12069	5.98942	6.14789	6.61455	6.30077	6.70339	7.20375	6.24467	6.92552	7.77373	7.68203	8.58104	0.71853	0.136485	0.022715	0.368848	0.704398	1.3156	0.300036	0.549399	0.489837	0.994288	2.93937	3.96516	0.083054	0.255251	0.777625	1.15918	1.38126	1.87765	-0.216982	-0.294148	0.287788	0.16489	-1.55811	-2.08751
13500977	AT5G13330	7.26197	7.25345	7.37362	6.91356	6.50772	6.75251	7.85718	8.14197	8.27054	7.34412	7.71259	9.31637	8.262	8.20279	8.41665	8.36952	7.47904	7.64757	9.00921	9.31822	9.22689	8.94889	8.454	9.63436	1.00003	0.949334	1.04303	1.45596	0.971328	0.89506	0.595212	0.888519	0.896925	0.430555	1.20487	2.56386	0.747208	1.11543	0.810243	0.579364	0.974954	1.98679	0.151996	0.226912	-0.086682	0.148809	-0.229921	-0.577068
13508159	AT5G38710	5.64822	5.37277	4.63395	4.82939	6.03027	6.37684	5.75332	5.94684	6.89888	5.72084	7.36542	8.12981	7.3722	6.96704	6.93706	6.61505	6.75248	6.32597	7.84495	7.812	7.80598	7.34891	7.06889	7.78105	1.72399	1.59426	2.3031	1.78567	0.722203	-0.050868	0.105105	0.574064	2.26492	0.891457	1.33515	1.75297	0.47275	0.844968	0.868929	0.733853	0.316412	1.45508	0.367645	0.270904	-1.396	-0.157604	-1.01874	-0.297892
13517207	AT5G59820	6.43091	5.42136	6.28192	6.01243	4.72882	4.32232	6.72918	5.38988	5.89146	6.6256	5.60285	6.70603	7.48463	6.42818	6.94722	6.76558	5.82416	6.34704	8.16695	7.49052	6.43721	7.85915	6.69457	7.44047	1.05372	1.00682	0.665297	0.753155	1.09533	2.02473	0.298265	-0.031483	-0.390467	0.613172	0.874021	2.38371	0.682317	1.06234	-0.510013	1.09356	0.870415	1.09343	0.384052	1.09383	-0.119546	0.480393	-0.003606	-1.29029
13519410	AT5G64810	5.79882	5.03083	4.8605	4.76119	5.04855	6.37315	5.92336	5.35504	6.52381	6.08549	8.15958	9.14285	7.48346	7.51132	8.23067	8.6059	7.90717	8.4271	7.80496	8.12407	8.29608	9.1598	8.86597	9.23857	1.68464	2.48049	3.37017	3.8447	2.85861	2.05395	0.124539	0.32421	1.66331	1.3243	3.11103	2.7697	0.321502	0.612755	0.065409	0.553899	0.9588	0.811466	0.196963	0.288545	-1.5979	-0.770399	-2.15223	-1.95823
13520416	AT5G67080	5.06932	4.0946	4.28486	4.74918	3.58548	3.79012	5.07387	5.39565	4.40066	5.73022	5.61159	6.68099	5.93936	4.70336	4.25257	4.59549	4.21118	4.5928	6.21233	5.48182	5.15509	6.83894	5.3411	6.14304	0.870039	0.608762	-0.032294	-0.153693	0.625697	0.802677	0.004552	1.30105	0.115804	0.981033	2.0261	2.89087	0.272969	0.778458	0.902521	2.24345	1.12991	1.55025	0.268417	-0.522589	0.786717	1.26242	-0.89619	-1.34062
13520487	AT5G67300	6.44263	6.54663	6.30595	6.21926	6.33542	5.94825	6.54318	6.5172	6.35743	6.3707	6.36848	7.05621	6.7274	6.88017	6.56147	6.54122	6.57343	6.4529	6.52768	6.84593	7.0432	6.62202	6.72621	7.61773	0.284772	0.333542	0.255516	0.321955	0.238004	0.504656	0.10055	-0.029425	0.051478	0.151435	0.03306	1.10796	-0.199721	-0.034241	0.481731	0.080805	0.15278	1.16482	-0.300271	-0.004816	0.430253	-0.07063	0.11972	0.056862
13520514	AT5G67340	7.68717	6.87249	5.85851	6.25217	6.7424	6.55542	7.94212	6.7137	6.79311	6.61044	7.42328	8.1535	8.86297	7.93055	7.72049	8.03759	8.14518	8.1957	9.03391	8.50474	7.92466	8.20407	8.59415	9.00125	1.1758	1.05805	1.86198	1.78542	1.40278	1.64028	0.254952	-0.158794	0.934603	0.358274	0.680879	1.59808	0.17094	0.574188	0.204176	0.166483	0.448972	0.805545	-0.084012	0.732982	-0.730427	-0.191791	-0.231907	-0.792537
13521047	AT5G01900	3.67078	3.94608	3.04847	3.8226	3.05007	3.70159	3.70981	3.78292	3.43284	3.63071	5.4844	5.654	4.07306	3.70804	4.49524	4.63048	4.48156	4.61834	3.7226	4.33854	4.77325	5.37709	6.37412	5.96722	0.402275	-0.238039	1.44677	0.807877	1.43149	0.916757	0.039025	-0.163153	0.384375	-0.191885	2.43433	1.95242	-0.350457	0.630497	0.278011	0.746615	1.89256	1.34887	-0.389482	0.79365	-0.106364	0.9385	-0.541769	-0.603544
13521262	AT5G02490	6.47784	5.37153	5.69959	4.13451	5.25522	5.28425	6.60712	5.72691	6.67608	4.22058	6.16384	7.15519	7.84213	6.9802	6.71726	5.81641	6.21997	6.70573	8.50595	7.6199	6.72386	5.91188	6.78519	7.52766	1.36428	1.60867	1.01766	1.6819	0.964746	1.42148	0.129278	0.355381	0.976485	0.08607	0.908621	1.87094	0.663822	0.639699	0.006603	0.095479	0.565225	0.821923	0.534544	0.284318	-0.969882	0.009409	-0.343396	-1.04902
13522950	AT5G07010	8.19851	8.64954	7.50115	6.57972	8.21072	7.0503	8.18967	8.29175	7.98527	7.04328	9.5458	10.5882	8.17852	9.49591	8.73088	5.95626	8.04976	7.06104	8.37747	9.29802	8.70063	7.40256	8.78203	9.78863	-0.019997	0.846372	1.22973	-0.623457	-0.160956	0.010741	-0.008841	-0.357785	0.484126	0.463561	1.33509	3.53792	0.198957	-0.197883	-0.030248	1.4463	0.732263	2.72759	0.207798	0.159902	-0.514374	0.982738	-0.602822	-0.810329
13525392	AT5G12930	6.53993	5.67725	5.21703	5.69296	5.81515	5.25173	6.63928	6.00112	5.88908	6.08776	5.98878	6.36064	7.37979	6.19168	5.79324	6.65536	6.46102	6.36811	8.03486	6.74942	6.65046	7.01492	6.65695	7.48446	0.839856	0.514425	0.576213	0.962406	0.64587	1.11638	0.099354	0.32386	0.672045	0.394804	0.173632	1.1089	0.655076	0.557744	0.857211	0.35956	0.195931	1.11634	0.555722	0.233884	0.185166	-0.035244	0.022299	0.007439
13525472	AT5G13080	5.72037	6.4651	5.70109	6.16111	6.02755	4.70029	6.47929	6.64658	7.24851	6.42982	7.24183	8.88986	8.2687	7.91385	7.83796	7.84461	7.21141	7.82324	9.47663	9.18509	8.57076	8.73103	7.8852	9.49973	2.54833	1.44875	2.13687	1.6835	1.18386	3.12295	0.758919	0.181484	1.54742	0.268711	1.21428	4.18958	1.20793	1.27124	0.7328	0.886421	0.673788	1.67649	0.449012	1.08976	-0.814624	0.61771	-0.540492	-2.51309
13525956	AT5G14180	4.4915	4.42439	4.1493	4.39112	4.47233	3.67054	4.35058	4.93479	4.27299	4.21762	4.91405	5.41677	4.16524	4.40239	4.36165	4.46271	4.64997	4.20286	4.52018	4.64083	4.8924	4.56461	4.56696	4.97143	-0.326256	-0.022007	0.21235	0.071589	0.177643	0.532318	-0.140916	0.510398	0.123692	-0.173503	0.441724	1.74623	0.354939	0.238441	0.530753	0.101906	-0.083013	0.768568	0.495855	-0.271957	0.407061	0.275409	-0.524737	-0.977663
13528445	AT5G19880	4.21217	4.30795	4.63225	4.69543	5.12282	4.81566	5.34668	5.29914	5.59755	5.04837	5.88612	6.32189	5.21849	5.57011	5.28365	5.20996	6.36127	6.71286	6.6369	6.61022	6.30743	5.84628	7.17933	7.57411	1.00631	1.26215	0.651399	0.514528	1.23845	1.8972	1.13451	0.991185	0.965305	0.35293	0.763302	1.50623	1.41841	1.04011	1.02378	0.636315	0.818059	0.861256	0.283905	0.048929	0.058475	0.283385	0.054757	-0.64497
13529454	AT5G22540	3.26571	3.38822	3.20474	3.85387	3.57504	3.32497	3.66582	3.3382	3.81672	3.86525	4.73887	5.56415	3.73567	3.73567	3.64864	3.38329	3.75092	3.30325	4.07141	4.01757	4.12579	4.05549	3.68305	4.24862	0.469962	0.347452	0.443896	-0.470584	0.175882	-0.02172	0.400111	-0.050011	0.611979	0.011377	1.16382	2.23918	0.335743	0.281898	0.477157	0.6722	-0.067876	0.945371	-0.064368	0.331909	-0.134822	0.660823	-1.2317	-1.29381
13530600	AT5G24770	4.11243	3.39146	3.62785	3.29077	4.3556	4.49845	3.70561	3.60958	3.59536	3.6429	7.51932	8.58965	3.49378	3.5045	3.21708	3.78214	3.25833	3.46111	3.64283	3.30091	3.28304	3.42128	4.7022	4.49109	-0.618646	0.113039	-0.410775	0.491369	-1.09727	-1.03734	-0.406819	0.218114	-0.032489	0.352123	3.16372	4.0912	0.149045	-0.203588	0.065958	-0.360865	1.44387	1.02998	0.555864	-0.421702	0.098447	-0.712988	-1.71985	-3.06122
13530607	AT5G24780	6.05524	5.28761	5.4586	5.03901	5.729	5.6878	6.0541	5.69126	6.00967	5.67068	8.62335	10.1824	4.62181	4.40126	3.80358	4.3475	5.5582	4.60807	4.18732	3.80358	5.20282	5.73304	7.14469	8.73624	-1.43344	-0.886349	-1.65502	-0.691504	-0.170807	-1.07973	-0.001148	0.40365	0.551068	0.631675	2.89434	4.49456	-0.434485	-0.597681	1.39924	1.38554	1.58649	4.12817	-0.433337	-1.00133	0.848175	0.753863	-1.30786	-0.366393
13531409	AT5G27060	4.9995	5.72039	6.04475	5.54088	5.5389	5.29661	4.93832	6.15341	5.67092	6.264	8.25427	8.86168	3.84745	4.57676	4.22796	4.09048	4.38378	5.82683	5.60754	5.18878	4.31533	6.17873	6.28563	7.3013	-1.15205	-1.14363	-1.81679	-1.4504	-1.15513	0.530213	-0.06118	0.433024	-0.373835	0.723125	2.71537	3.56507	1.76009	0.612027	0.087367	2.08826	1.90185	1.47448	1.82127	0.179003	0.461202	1.36513	-0.813518	-2.09059
13532805	AT5G36970	2.7398	2.91243	3.12276	2.52612	2.39636	2.56464	2.72979	2.85866	2.43575	2.48881	2.72107	4.04092	4.28207	3.64775	2.98668	3.66563	2.74848	4.28158	5.63214	3.84989	3.94913	4.65005	3.77869	6.68391	1.54226	0.735323	-0.136085	1.13951	0.352112	1.71694	-0.010011	-0.053766	-0.687013	-0.037317	0.324707	1.47628	1.35008	0.202134	0.962455	0.984412	1.03022	2.40233	1.36009	0.2559	1.64947	1.02173	0.70551	0.926053
13534993	AT5G43580	2.98249	3.13215	2.8345	3.2498	3.28074	3.05728	3.101	2.94587	3.03718	2.95694	3.53295	5.66073	3.30676	3.05039	3.26113	3.03796	2.99442	2.9497	3.05223	2.85907	3.14227	3.1222	2.86111	4.07815	0.324263	-0.081765	0.426632	-0.211838	-0.286317	-0.107577	0.118511	-0.186281	0.202678	-0.292859	0.252215	2.60345	-0.254527	-0.19132	-0.118858	0.084235	-0.133316	1.12844	-0.373038	-0.005039	-0.321536	0.377094	-0.385531	-1.47501
13536226	AT5G46350	5.50633	5.468	5.32139	5.49661	5.6368	5.50039	5.76003	5.57555	5.63242	5.83325	6.00163	7.2711	6.3697	6.38187	5.87509	6.23035	6.67714	6.54814	6.78029	6.54462	5.79177	6.57194	6.75412	7.46663	0.863372	0.913861	0.553698	0.733738	1.04034	1.04775	0.253704	0.107542	0.311031	0.336644	0.364823	1.77071	0.410587	0.162756	-0.083318	0.341592	0.076979	0.91849	0.156883	0.055214	-0.394349	0.004948	-0.287844	-0.852223
13541306	AT5G59220	4.94146	5.62191	5.73959	5.17361	6.34155	7.45176	5.16776	5.83628	5.79195	5.23768	7.03382	8.61256	5.12226	5.92901	6.54805	6.1063	6.89193	7.32472	6.33729	6.79228	6.9364	6.66496	7.39543	8.83669	0.180802	0.307104	0.808465	0.932689	0.550379	-0.127043	0.226301	0.214368	0.052362	0.064067	0.692272	1.1608	1.21502	0.863272	0.388346	0.558664	0.503509	1.51197	0.988723	0.648904	0.335984	0.494597	-0.188763	0.351171
13542308	AT5G61890	6.00727	4.97736	4.60201	5.04858	4.93794	4.99295	5.88549	5.77616	4.8858	5.01821	5.6338	6.6522	6.16294	5.39691	5.24146	5.08186	4.79054	4.91688	6.12746	5.97311	5.39542	4.93992	4.90475	6.00021	0.155663	0.41956	0.639451	0.033278	-0.147403	-0.076077	-0.121784	0.79881	0.283791	-0.030369	0.695852	1.65925	-0.035474	0.57619	0.153953	-0.141938	0.11421	1.08334	0.08631	-0.22262	-0.129838	-0.111569	-0.581642	-0.575908
13544741	AT5G67480	10.3128	10.2674	10.245	10.1086	7.7228	7.08818	10.3651	10.4523	10.3779	10.2375	7.94679	8.91671	9.87615	9.90714	9.9752	9.60652	7.13841	7.20461	10.0757	10.084	9.70131	9.84643	6.96734	8.37956	-0.436649	-0.360225	-0.269828	-0.5021	-0.584396	0.116427	0.05231	0.18494	0.13284	0.12892	0.223993	1.82853	0.199529	0.176905	-0.273888	0.239912	-0.171066	1.17495	0.147219	-0.008035	-0.406728	0.110992	-0.395059	-0.653582
13373301	AT1G28370	6.58292	5.74683	6.5919	6.42514	5.61858	5.77681	6.94669	6.5181	6.49904	7.85919	6.21566	6.85093	6.49752	7.00432	7.16763	6.04068	6.07425	6.71191	7.12431	7.6444	6.76774	7.87154	6.68475	6.69604	-0.085407	1.25748	0.575729	-0.384467	0.455667	0.9351	0.363763	0.77127	-0.092867	1.43405	0.597083	1.07412	0.626794	0.640081	-0.399891	1.83086	0.610498	-0.015869	0.263031	-0.131189	-0.307024	0.396811	0.013415	-1.08999
13418736	AT2G38860	8.6442	8.27746	7.93883	7.94567	8.16567	8.37021	9.09474	9.21593	9.06258	8.40957	8.84161	9.28323	9.36777	9.41676	9.3844	8.69365	8.82171	9.09359	10.3747	10.3266	9.8041	9.40678	9.37813	9.77221	0.723576	1.1393	1.44557	0.747979	0.656043	0.723381	0.450542	0.938473	1.12375	0.463898	0.675941	0.913019	1.0069	0.909851	0.419697	0.713133	0.55642	0.678619	0.556356	-0.028622	-0.704052	0.249235	-0.119521	-0.2344
[truncated: 26 more columns]
