# Supplementary material for: Transcriptomic and Metabolomic Analysis of a Pseudomonas-Resistant versus a Susceptible Arabidopsis Accession
Source: Int J Mol Sci. 2022 Oct 11;23(20):12087. doi: 10.3390/ijms232012087 (PMC9603445; doi:10.3390/ijms232012087)
Supplement: Supplementary file 1 [file ijms-23-12087-s001.zip › Supplemental Table S7.xlsx]

## Sheet: 2h
Table S7: Col-0 unique differentially expressed genes related to defense responses after Pst infection.
Affymetrix ST 1.0 Probe	New locus	2h Col-0 Mock	4h Col-0 Mock	8h Col-0 Mock	16h Col-0 Mock	24h Col-0 Mock	48h Col-0 Mock	2h Col-0 Pst	4h Col-0 Pst	8h Col-0 Pst	16h Col-0 Pst	24h Col-0 Pst	48h Col-0 Pst	2h C24 Mock	4h C24 Mock	8h C24 Mock	16h C24 Mock	24h C24 Mock	48h C24 Mock	2h C24 Pst	4h C24 Pst	8h C24 Pst	16h C24 Pst	24h C24 Pst	48h C24 Pst	2h C24 Mock - Col-0 Mock	4h C24 Mock - Col-0 Mock	8h C24 Mock - Col-0 Mock	16h C24 Mock - Col-0 Mock	24h C24 Mock - Col-0 Mock	48h C24 Mock - Col-0 Mock	2h Col-0 Pst - Mock	4h Col-0 Pst - Mock	8h Col-0 Pst - Mock	16h Col-0 Pst - Mock	24h Col-0 Pst - Mock	48h Col-0 Pst - Mock	2h C24 Pst - Mock	4h C24 Pst - Mock	8h C24 Pst - Mock	16h C24 Pst - Mock	24h C24 Pst - Mock	48h C24 Pst - Mock	2h C24 Pst - Col-0 Pst (each Mock subtracted)	4h C24 Pst - Col-0 Pst (each Mock subtracted)	8h C24 Pst - Col-0 Pst (each Mock subtracted)	16h C24 Pst - Col-0 Pst (each Mock subtracted)	24h C24 Pst - Col-0 Pst (each Mock subtracted)	48h C24 Pst - Col-0 Pst (each Mock subtracted)
13334202	AT1G01115	3.04206	3.58617	3.41363	3.44531	3.28721	3.32057	3.63987	3.65146	3.55212	3.76284	3.46132	3.42934	4.01831	3.61448	3.87403	3.86818	3.60175	3.7504	3.97629	3.83981	3.49605	3.83181	3.36542	3.63987	0.976248	0.02831	0.460392	0.422871	0.314538	0.429823	0.597815	0.065292	0.138481	0.317535	0.17411	0.108769	-0.04202	0.225332	-0.377977	-0.036368	-0.236334	-0.110521	-0.639835	0.16004	-0.516458	-0.353903	-0.410444	-0.21929
13334298	AT1G01370	6.65231	6.05692	5.78369	6.51086	6.23006	7.04604	5.83234	5.7375	5.78053	6.22224	6.4845	6.73627	6.29775	5.99711	6.21189	6.93783	6.99946	6.7919	6.51864	6.24727	6.46335	7.12054	7.10609	7.09717	-0.354555	-0.059816	0.428195	0.426975	0.769396	-0.254142	-0.81997	-0.319427	-0.003163	-0.288616	0.254441	-0.309768	0.220886	0.250158	0.251469	0.182713	0.106637	0.305271	1.04086	0.569585	0.254632	0.471329	-0.147804	0.615039
13334311	AT1G01380	6.23639	5.48766	5.65014	5.71782	6.22963	6.99026	4.83725	5.18982	5.08009	5.72649	6.72515	6.31134	4.71832	4.03233	4.5388	5.12751	5.61223	5.25462	4.13504	4.61547	4.79806	4.80261	5.17132	4.84088	-1.51807	-1.45533	-1.11134	-0.590319	-0.617402	-1.73564	-1.39914	-0.297842	-0.570049	0.008663	0.495515	-0.678919	-0.583283	0.58314	0.259261	-0.324896	-0.440906	-0.413743	0.815858	0.880982	0.82931	-0.333559	-0.936421	0.265176
13334424	AT1G01600	4.62614	4.39535	4.26661	4.45401	4.17626	4.49803	3.82942	4.84342	3.99497	4.74902	5.56527	4.7139	3.7107	4.03594	3.73029	4.03478	4.11671	3.69012	3.65643	3.63038	4.18274	4.05834	3.76656	3.7658	-0.915447	-0.359408	-0.536319	-0.419231	-0.059546	-0.807904	-0.796721	0.448069	-0.271641	0.295011	1.38901	0.215874	-0.054271	-0.40556	0.452449	0.023568	-0.350157	0.07568	0.74245	-0.853629	0.72409	-0.271443	-1.73917	-0.140194
13334552	AT3G50840	6.05403	7.05934	6.81838	6.43728	7.07378	6.75958	6.68326	6.8723	5.85088	6.41953	6.78615	6.81047	6.60494	5.86453	6.40697	6.15657	6.27647	6.00258	6.00079	6.10011	6.58063	5.82997	6.49336	6.00886	0.55091	-1.19481	-0.411405	-0.280711	-0.797311	-0.757003	0.629236	-0.187033	-0.967498	-0.017749	-0.287637	0.05089	-0.604148	0.235575	0.173656	-0.326603	0.216888	0.006283	-1.23338	0.422608	1.14115	-0.308854	0.504525	-0.044607
13334650	AT1G02074	4.73574	5.98734	6.2991	4.74298	5.12454	5.74415	5.50747	6.03425	4.30363	4.83154	5.07277	6.43961	5.18156	4.94078	4.67166	4.68971	4.51329	5.10576	5.17665	4.66341	4.76227	3.61839	5.01795	4.20824	0.445813	-1.04656	-1.62743	-0.053274	-0.611256	-0.638388	0.771727	0.046918	-1.99547	0.08856	-0.051769	0.695463	-0.004906	-0.277369	0.090608	-1.07132	0.504661	-0.897521	-0.776633	-0.324287	2.08607	-1.15988	0.55643	-1.59298
13334797	AT1G02205	9.33429	8.71753	9.12335	8.78775	9.27964	10.597	8.49337	8.27386	8.34251	8.06278	9.46362	9.95793	8.20757	8.45857	8.78039	8.02144	9.07498	9.53197	7.60757	7.78753	8.34653	7.65155	8.345	9.21083	-1.12672	-0.258961	-0.342952	-0.76631	-0.204664	-1.06506	-0.840923	-0.443677	-0.780836	-0.72497	0.183973	-0.6391	-0.599998	-0.671043	-0.433861	-0.369894	-0.729981	-0.321136	0.240925	-0.227366	0.346975	0.355076	-0.913954	0.317964
13334875	AT1G02490	3.37189	3.87664	3.53797	4.04301	4.18017	3.97679	4.441	5.42523	4.13847	3.89516	3.8661	4.03789	4.53347	3.73189	4.58049	4.55324	4.60748	4.26123	4.12429	4.35939	4.09984	4.9474	4.47968	4.75711	1.16158	-0.144751	1.04252	0.51023	0.42731	0.284441	1.06911	1.54859	0.600502	-0.147845	-0.314065	0.061094	-0.409186	0.627502	-0.480655	0.394158	-0.127802	0.495872	-1.47829	-0.921088	-1.08116	0.542003	0.186263	0.434778
13334953	AT1G02650	6.17412	5.35032	5.03901	5.21691	5.0811	4.61479	5.17855	5.11216	5.22758	5.21242	4.83551	4.20537	5.65886	4.7554	4.95763	4.92829	4.83421	4.85046	6.01817	5.73627	5.23929	5.00724	4.99139	4.66449	-0.515252	-0.594926	-0.081374	-0.288614	-0.246887	0.235679	-0.995567	-0.238163	0.188571	-0.004488	-0.245589	-0.409414	0.359304	0.980867	0.281658	0.078948	0.157183	-0.185974	1.35487	1.21903	0.093087	0.083436	0.402772	0.22344
13335291	AT1G03320	2.79514	3.62971	3.72598	3.91725	3.58548	3.71448	3.44314	3.3609	3.39172	3.35355	4.20514	3.31338	3.63588	3.70698	4.02988	4.16322	4.6304	3.90955	3.90228	3.75474	3.93605	3.97795	3.53344	3.37565	0.840743	0.077264	0.303901	0.245961	1.04492	0.195068	0.648006	-0.26881	-0.334266	-0.563706	0.619657	-0.401101	0.266396	0.047757	-0.093828	-0.185264	-1.09696	-0.533901	-0.38161	0.316567	0.240438	0.378442	-1.71662	-0.1328
13335471	AT1G03905	4.6818	4.56067	4.6262	5.29626	4.74742	4.63136	5.3793	4.79149	4.86989	4.95411	4.93839	4.82344	6.50708	6.15417	6.33804	6.35913	6.08756	6.11855	6.73262	6.2715	6.55099	6.99211	6.22489	6.3544	1.82528	1.59351	1.71184	1.06287	1.34014	1.48719	0.697498	0.230828	0.243691	-0.34215	0.190974	0.192083	0.225538	0.117331	0.212955	0.63298	0.137327	0.235856	-0.47196	-0.113497	-0.030736	0.97513	-0.053647	0.043773
13335852	AT1G04635	5.51306	4.54837	5.29538	4.57585	4.32346	4.03216	4.83726	4.29214	4.72322	4.23912	4.87079	4.32602	4.48657	4.85151	4.54837	4.58902	3.9344	4.34411	4.5659	4.03793	4.98014	4.16838	3.68035	4.43731	-1.02649	0.303137	-0.747006	0.013164	-0.389054	0.311943	-0.6758	-0.256232	-0.572156	-0.336734	0.547334	0.293853	0.079327	-0.81358	0.431769	-0.420639	-0.254057	0.093199	0.755127	-0.557348	1.00392	-0.083905	-0.801391	-0.200654
13336002	AT1G05100	5.68543	5.06476	5.14575	5.3151	5.77028	6.29765	4.61638	4.79376	5.19585	5.85495	5.92462	8.06752	6.00541	6.0887	5.19813	6.39429	6.23342	6.31127	5.65557	5.68092	5.56116	6.92507	7.08342	8.79824	0.319981	1.02394	0.052386	1.07919	0.463139	0.013618	-1.06905	-0.271002	0.050109	0.539847	0.154344	1.76987	-0.349843	-0.407778	0.363027	0.530774	0.849999	2.48697	0.719209	-0.136776	0.312918	-0.009073	0.695655	0.717098
13336198	AT1G05730	4.73373	4.42932	4.93518	3.95212	3.85622	3.70979	4.00774	4.72588	4.58621	4.39752	4.07589	4.0281	4.19733	4.70233	4.58966	4.48229	4.32686	4.80566	4.52917	4.78569	4.64965	4.4112	4.57515	4.16219	-0.536403	0.273009	-0.345518	0.530177	0.470635	1.09587	-0.725992	0.296553	-0.348963	0.445399	0.219667	0.318314	0.331842	0.083355	0.059995	-0.071099	0.248296	-0.643463	1.05783	-0.213198	0.408958	-0.516498	0.028629	-0.961777
13336434	AT1G06120	2.7906	3.12285	3.43369	3.44337	3.33965	3.9452	4.66702	3.14174	3.68163	3.06276	3.15218	4.04399	3.14924	4.02406	3.85416	2.27484	2.94525	3.87786	3.3132	3.28445	2.77014	3.33822	4.02226	2.77066	0.358636	0.901213	0.420463	-1.16853	-0.394404	-0.067337	1.87642	0.018885	0.247936	-0.380604	-0.187474	0.098793	0.163964	-0.739611	-1.08402	1.06339	1.07701	-1.1072	-1.71246	-0.758496	-1.33196	1.44399	1.26449	-1.20599
13336586	AT1G06480	3.33524	3.09723	4.32096	3.89791	4.90126	3.46694	4.02129	4.16561	3.15078	3.36823	3.33156	4.65867	3.67562	3.82429	4.21585	4.00814	4.28237	3.84665	4.20483	3.32793	3.56066	3.63762	4.17625	4.41249	0.340381	0.727059	-0.105113	0.110233	-0.618888	0.37971	0.686055	1.06838	-1.17018	-0.529685	-1.5697	1.19173	0.529213	-0.496368	-0.655184	-0.370523	-0.106123	0.565836	-0.156842	-1.56475	0.514992	0.159162	1.46358	-0.625899
13336657	AT1G06620	5.88209	5.0126	5.68784	5.27649	5.33293	5.60389	6.47507	5.47049	6.33018	6.64029	7.83372	8.61519	6.68103	6.12808	6.41689	6.06802	6.74413	7.28069	7.15327	6.65774	7.13875	7.24524	8.15635	8.72324	0.798941	1.11548	0.729056	0.79153	1.4112	1.6768	0.592989	0.457884	0.642344	1.36381	2.50079	3.01131	0.472249	0.529662	0.721859	1.17723	1.41223	1.44255	-0.12074	0.071778	0.079515	-0.186582	-1.08856	-1.56876
13336767	AT1G06830	7.13378	5.96406	5.21405	7.13036	7.34562	5.93503	6.23599	5.0579	5.97806	6.79916	6.82374	5.73916	6.32513	5.78777	5.49637	6.13783	6.67069	5.97769	6.56436	6.10327	5.50491	6.14034	6.65678	6.13485	-0.808651	-0.176288	0.282323	-0.992538	-0.674926	0.042656	-0.897796	-0.906167	0.764014	-0.331203	-0.521878	-0.195869	0.239227	0.315498	0.008541	0.002516	-0.013913	0.157158	1.13702	1.22167	-0.755473	0.333719	0.507965	0.353027
13336876	AT1G07175	5.91325	5.53047	5.06883	5.65307	5.15101	5.47989	5.01595	5.20693	4.8407	5.02105	5.46394	4.99812	5.77355	5.27221	5.71113	5.55001	5.09218	5.15101	5.68719	5.40757	5.18461	5.28913	5.3156	5.36368	-0.139697	-0.258263	0.642301	-0.103059	-0.058828	-0.328882	-0.897306	-0.323545	-0.228125	-0.632021	0.312926	-0.481774	-0.086361	0.135362	-0.526523	-0.260884	0.223418	0.212667	0.810945	0.458907	-0.298398	0.371137	-0.089508	0.694441
13337021	AT1G07610	8.33445	6.90282	5.89544	7.29348	8.43263	9.35024	7.72847	6.72369	6.64426	7.22732	8.82086	9.70628	8.02598	6.74925	6.66753	7.52956	8.79614	9.71974	7.86629	7.14819	6.99802	8.03312	8.70735	10.1233	-0.308466	-0.153572	0.772085	0.236079	0.363511	0.369494	-0.605983	-0.179128	0.748817	-0.066162	0.388229	0.356035	-0.159693	0.398948	0.330488	0.503555	-0.088796	0.403551	0.44629	0.578076	-0.418329	0.569717	-0.477025	0.047516
13337122	AT1G07850	4.23923	4.45752	4.20875	4.48933	4.26613	4.48563	4.8509	4.6597	4.37036	4.32104	4.17243	3.82535	4.74078	4.64782	4.77206	4.59418	4.85508	4.47492	4.65002	4.82811	4.81442	4.40033	4.61318	4.84506	0.501552	0.190298	0.563308	0.104853	0.588953	-0.010702	0.611675	0.202176	0.161613	-0.168295	-0.093699	-0.660279	-0.090756	0.180292	0.042366	-0.193852	-0.241898	0.370134	-0.702431	-0.021884	-0.119247	-0.025557	-0.148199	1.03041
13337142	AT1G07900	5.9611	6.23225	6.29423	5.69352	6.27369	7.20322	4.21654	5.4589	5.85541	6.06902	6.80298	8.53241	5.5595	5.71901	5.79396	7.14554	6.59105	7.58846	5.40402	5.44084	5.17752	6.86055	7.2981	8.09578	-0.401594	-0.513241	-0.500272	1.45202	0.317361	0.385248	-1.74456	-0.773357	-0.438824	0.375506	0.529292	1.32919	-0.155479	-0.278175	-0.616435	-0.284992	0.707045	0.507314	1.58908	0.495182	-0.177611	-0.660498	0.177753	-0.821881
13337351	AT1G08420	7.92641	8.3131	8.19318	7.93529	8.57393	8.11368	8.59658	8.59566	8.19216	8.2377	8.28793	7.928	9.34192	8.81967	9.04116	9.12384	9.26666	8.83165	8.98782	8.65337	8.90359	8.83382	8.64213	9.08021	1.41551	0.506566	0.847974	1.18855	0.692739	0.71797	0.670175	0.282554	-0.001018	0.302412	-0.285998	-0.185689	-0.354107	-0.166302	-0.137562	-0.290027	-0.624538	0.248554	-1.02428	-0.448856	-0.136544	-0.592439	-0.33854	0.434243
13337375	AT1G08430	3.34599	4.11244	4.15428	3.99061	4.4091	3.94093	2.55881	4.13379	2.79736	3.20151	3.4989	3.49317	3.21052	3.05962	2.94188	3.33386	3.16206	3.43926	3.38502	2.867	2.5134	3.54531	3.15455	3.27174	-0.13547	-1.05282	-1.2124	-0.656748	-1.24704	-0.501663	-0.787182	0.021351	-1.35692	-0.7891	-0.910201	-0.447755	0.174495	-0.192618	-0.428483	0.211446	-0.00751	-0.167522	0.961677	-0.213969	0.928435	1.00055	0.902691	0.280233
13337383	AT1G08440	4.73463	3.22534	2.95809	2.97609	2.9593	3.02328	3.08679	4.09075	2.80054	2.81726	3.3897	3.26396	2.76022	3.06381	3.10287	2.57064	3.21747	4.26364	2.50458	2.9258	3.03481	2.60467	3.47301	2.86514	-1.97442	-0.161534	0.14478	-0.40545	0.258178	1.24036	-1.64784	0.86541	-0.157552	-0.158823	0.430401	0.240675	-0.255638	-0.138009	-0.068058	0.034028	0.255535	-1.3985	1.3922	-1.00342	0.089494	0.192851	-0.174866	-1.63918
13337918	AT1G09350	3.67495	3.78384	3.55267	3.38205	4.66657	4.34853	4.41422	3.45931	3.6936	3.25228	4.67486	3.44442	3.92161	3.8993	3.40524	3.60535	3.14703	3.60509	3.36569	3.42748	3.61375	3.50533	3.44708	3.41988	0.246664	0.115461	-0.147425	0.223294	-1.51954	-0.743437	0.739271	-0.324525	0.140934	-0.129778	0.008292	-0.904106	-0.555924	-0.471819	0.208509	-0.100014	0.300055	-0.185217	-1.2952	-0.147294	0.067575	0.029764	0.291763	0.718889
13338081	AT1G09665	4.84734	5.23749	5.07018	4.37154	4.70207	5.40832	4.16589	5.4314	3.98626	4.19864	4.76818	5.17433	3.54818	4.43569	3.8368	4.12116	4.16849	4.24549	3.71257	4.27486	3.58986	3.76235	4.868	3.63113	-1.29916	-0.801798	-1.23338	-0.250376	-0.533577	-1.16283	-0.681445	0.193912	-1.08392	-0.172898	0.066118	-0.233986	0.164396	-0.160828	-0.246946	-0.358807	0.699508	-0.614359	0.845841	-0.35474	0.836977	-0.185909	0.63339	-0.380373
13338680	AT1G11160	4.5459	5.20555	5.93906	5.28787	5.42918	5.81854	5.1827	4.79669	5.41195	4.8721	4.90342	4.69664	5.3477	5.54993	5.53074	5.60788	5.37491	5.77362	4.90059	5.42196	5.97633	5.37537	5.4912	4.97494	0.801799	0.344384	-0.408315	0.320001	-0.054268	-0.044924	0.636797	-0.40886	-0.527108	-0.415773	-0.52576	-1.1219	-0.447113	-0.127974	0.445592	-0.232505	0.116294	-0.798677	-1.08391	0.280886	0.9727	0.183268	0.642054	0.323227
13338828	AT1G11460	3.00853	3.36474	3.67876	2.8003	3.53465	3.11659	2.4	3.65571	3.71976	3.12274	3.21958	2.95688	3.20925	3.08842	3.86841	4.13178	3.61715	2.83621	3.35059	3.64597	3.79809	3.64315	4.64083	3.4486	0.200721	-0.276313	0.18965	1.33148	0.082498	-0.280383	-0.608531	0.290978	0.041006	0.322432	-0.315073	-0.159709	0.141336	0.557545	-0.070317	-0.488638	1.02367	0.612389	0.749867	0.266567	-0.111323	-0.81107	1.33875	0.772098
13338853	AT1G50070	4.59265	4.61479	4.73686	4.31339	4.88589	4.56648	4.01872	4.95707	4.39369	4.1579	4.56313	4.22236	4.47247	4.76703	4.39829	4.85704	4.39071	4.85985	4.72354	4.52253	4.73496	4.15594	4.74998	4.41005	-0.120185	0.152239	-0.338563	0.543648	-0.495178	0.293375	-0.573932	0.342276	-0.343169	-0.155488	-0.322756	-0.344119	0.251069	-0.244498	0.336666	-0.701097	0.359268	-0.449805	0.825001	-0.586774	0.679835	-0.545609	0.682024	-0.105686
13339117	AT1G12100	6.815	6.16226	5.76585	5.2062	6.20414	5.03933	6.13866	5.22886	6.05152	5.40523	5.14456	3.72138	6.96474	7.26695	6.50769	6.75734	6.68511	6.30193	6.94794	6.57472	6.17182	6.16151	6.55646	5.96731	0.149737	1.10468	0.741839	1.55114	0.480971	1.2626	-0.67634	-0.933401	0.28567	0.199024	-1.05958	-1.31796	-0.016798	-0.692225	-0.33587	-0.59583	-0.128659	-0.334623	0.659542	0.241176	-0.62154	-0.794854	0.930925	0.983333
13339477	AT1G12890	4.36081	3.38503	2.93475	3.03169	3.33345	3.42972	3.35196	3.78184	3.16732	3.7088	3.52449	3.68613	3.63317	3.15125	3.49693	3.40725	3.59803	3.86379	3.49204	3.06468	3.32368	3.42717	3.37527	3.50788	-0.727648	-0.233781	0.562185	0.375563	0.264578	0.434063	-1.00885	0.396808	0.232574	0.677118	0.191031	0.256405	-0.141129	-0.08657	-0.173255	0.019924	-0.222768	-0.355902	0.867723	-0.483378	-0.405829	-0.657194	-0.413799	-0.612307
13339486	AT1G12950	4.59738	4.52792	4.44806	4.47234	4.56674	4.22062	3.97936	4.27025	3.86497	4.44806	4.64077	4.05819	4.62608	4.52258	3.60524	4.18813	4.51469	4.50552	4.44806	4.70067	4.12531	3.75017	4.34703	4.00871	0.028703	-0.005342	-0.842822	-0.284212	-0.052049	0.284905	-0.618015	-0.257667	-0.583091	-0.024276	0.074036	-0.162426	-0.178017	0.178091	0.520065	-0.437962	-0.167655	-0.496809	0.439998	0.435758	1.10316	-0.413686	-0.241691	-0.334383
13339973	AT1G14250	6.27838	4.68903	5.25865	4.72669	7.75534	7.14112	5.17513	5.27422	6.87767	6.44575	10.1853	10.942	7.60091	6.10914	6.20623	5.30102	7.57435	8.25416	7.96945	5.95047	6.77474	6.59316	9.95895	10.5165	1.32253	1.42011	0.947581	0.574338	-0.180987	1.11304	-1.10325	0.585192	1.61902	1.71907	2.43	3.80088	0.368542	-0.158667	0.568507	1.29214	2.38459	2.26233	1.47179	-0.743859	-1.05051	-0.426931	-0.045406	-1.53855
13340061	AT1G14470	6.73157	7.20028	7.80378	7.31028	6.26512	5.91955	5.80547	7.57099	7.61188	7.39056	6.22095	6.19761	6.22153	7.22639	7.37086	6.71793	6.02997	6.40707	6.40834	7.17269	7.99502	6.80434	6.26153	6.50325	-0.510043	0.026109	-0.43292	-0.592356	-0.235144	0.487516	-0.926097	0.370703	-0.191907	0.080276	-0.044164	0.278058	0.18681	-0.053702	0.624159	0.08641	0.231554	0.096182	1.11291	-0.424405	0.816066	0.006134	0.275718	-0.181876
13340063	AT1G14480	4.47576	4.92267	5.64832	5.23858	4.52284	4.38862	5.12852	5.3477	5.3858	5.25021	4.57289	4.51201	4.65258	5.03805	5.54532	5.08851	4.35221	4.93872	4.56529	5.08019	5.27189	5.32122	4.73948	5.00551	0.176818	0.115379	-0.103006	-0.150075	-0.170636	0.550101	0.652758	0.425027	-0.262521	0.011631	0.050053	0.123396	-0.087289	0.042141	-0.273429	0.232708	0.387271	0.066794	-0.740047	-0.382886	-0.010908	0.221077	0.337218	-0.056602
13340121	AT1G14642	7.93178	8.60027	8.29744	8.82582	8.44115	8.3617	8.57271	8.35814	8.27182	8.39532	8.54494	8.17084	8.97965	8.47957	8.53472	8.54494	8.67352	8.39066	8.78006	8.78944	8.87435	8.90582	8.68249	8.55226	1.04787	-0.120707	0.237275	-0.280875	0.232364	0.028956	0.640932	-0.242132	-0.025628	-0.4305	0.10379	-0.190865	-0.199594	0.309878	0.339634	0.360873	0.008968	0.1616	-0.840526	0.55201	0.365262	0.791373	-0.094822	0.352465
13340695	AT1G16120	4.33847	4.40892	3.36866	3.44631	3.74259	3.54165	3.76525	4.04378	3.45471	3.79428	3.47807	3.8106	3.64232	3.64232	3.83676	4.32027	3.82659	3.55925	3.86301	4.00348	3.54484	3.36866	3.35279	3.58132	-0.696148	-0.766596	0.468094	0.873959	0.083995	0.017604	-0.573215	-0.365143	0.086044	0.347964	-0.26452	0.268953	0.220691	0.361155	-0.291914	-0.95161	-0.473802	0.022069	0.793906	0.726298	-0.377958	-1.29957	-0.209282	-0.246884
13340709	AT1G16160	4.10778	5.23159	4.62561	5.23159	4.42559	5.0911	5.23159	6.30177	4.31724	4.97083	4.40389	5.55483	5.36358	5.25593	5.5664	5.87171	5.76339	5.21191	5.26609	5.20932	5.66979	5.53709	5.50566	5.23159	1.2558	0.02434	0.940795	0.640123	1.3378	0.120805	1.12381	1.07018	-0.308368	-0.26076	-0.021705	0.46372	-0.097493	-0.046609	0.103393	-0.334627	-0.25773	0.01968	-1.22131	-1.11679	0.411761	-0.073867	-0.236025	-0.44404
13340808	AT1G16410	4.14492	3.76046	4.83804	5.19672	6.4904	6.88507	3.40365	4.31176	5.06607	5.32833	6.83532	7.01852	4.46661	5.1756	5.00428	5.49633	7.03624	6.98602	4.42635	4.61078	5.19102	6.33118	6.81652	6.93849	0.321691	1.41514	0.166243	0.299616	0.545842	0.100951	-0.741273	0.551298	0.228026	0.131613	0.344924	0.13345	-0.040265	-0.56482	0.186735	0.834851	-0.219724	-0.047537	0.701008	-1.11612	-0.041291	0.703238	-0.564648	-0.180987
13340912	AT1G16640	7.0929	5.05301	5.4188	6.76886	6.31478	5.43471	6.50464	5.30835	5.80821	6.971	5.15444	4.53061	6.88581	5.51443	5.71807	7.2102	6.64642	6.3339	6.95618	5.48035	6.18823	7.35475	6.15198	6.04646	-0.207094	0.461426	0.299272	0.441341	0.331646	0.899196	-0.588256	0.255346	0.389409	0.202144	-1.16033	-0.904097	0.070378	-0.03408	0.470163	0.144547	-0.494444	-0.287445	0.658634	-0.289426	0.080754	-0.057597	0.665891	0.616652
13341089	AT1G16910	4.02497	3.16024	3.13644	3.04892	3.16124	3.08336	3.16615	2.80127	3.06383	2.90849	3.17738	2.98892	3.79491	3.66459	3.65249	3.21806	3.43998	2.97432	3.95446	3.27628	3.38417	3.11156	3.31533	2.93829	-0.230058	0.504355	0.516042	0.16914	0.27874	-0.109039	-0.858817	-0.358965	-0.072614	-0.140427	0.016138	-0.094435	0.159554	-0.38831	-0.26832	-0.106505	-0.124655	-0.036029	1.01837	-0.029345	-0.195706	0.033922	-0.140793	0.058406
13341128	AT1G17000	3.35748	2.37056	2.5086	2.88313	2.27647	2.7545	2.44406	2.55944	2.33228	2.67464	2.53526	2.06666	2.44864	2.72173	2.39891	3.05222	2.5086	2.38844	2.86223	2.5086	2.84566	2.55632	2.38571	2.33647	-0.908843	0.351172	-0.109686	0.169088	0.232127	-0.36606	-0.913427	0.188885	-0.176316	-0.208496	0.258788	-0.687836	0.413588	-0.21313	0.446743	-0.495905	-0.122894	-0.051973	1.32702	-0.402015	0.623059	-0.287409	-0.381682	0.635863
13341233	AT1G17190	5.85012	5.24039	6.05297	6.35169	5.97977	7.02075	5.18331	4.98337	5.65626	5.88154	6.42443	6.34957	5.35692	5.5185	5.11089	5.50809	6.61415	6.84453	5.40794	5.06325	5.57688	5.76196	5.78204	6.44448	-0.493206	0.27811	-0.942072	-0.843601	0.634384	-0.176215	-0.666811	-0.257023	-0.396703	-0.470145	0.444662	-0.671184	0.05102	-0.455253	0.465988	0.253871	-0.832114	-0.400056	0.717831	-0.19823	0.862691	0.724016	-1.27678	0.271128
13341345	AT1G17345	3.36859	2.65526	3.14266	2.63417	2.35428	2.55188	2.70827	2.70119	2.76986	2.63291	2.49084	2.45388	2.69264	2.67855	2.32184	2.69642	2.55537	2.39317	2.75154	2.36535	2.61829	2.57633	2.46454	2.34053	-0.675945	0.02329	-0.820823	0.062252	0.201082	-0.158705	-0.66032	0.045929	-0.372806	-0.001255	0.136553	-0.098	0.058899	-0.313206	0.296455	-0.120085	-0.090829	-0.052647	0.719219	-0.359135	0.669261	-0.11883	-0.227382	0.045353
13341695	AT1G18350	6.22052	5.41056	4.75455	3.64308	4.08456	4.08253	5.30252	5.91612	4.84095	4.14184	3.69828	4.2264	5.58335	6.10923	5.06872	3.93724	4.681	4.01983	5.64726	5.6474	5.87143	4.50542	4.27088	4.67454	-0.637167	0.698666	0.314171	0.29416	0.596433	-0.062701	-0.917994	0.505562	0.086405	0.498762	-0.38628	0.143873	0.063908	-0.461833	0.802712	0.568186	-0.410113	0.65471	0.981902	-0.967395	0.716307	0.069424	-0.023833	0.510837
13341795	AT1G18510	3.57366	3.96142	4.03799	4.1013	3.89824	4.31063	4.4114	3.87547	4.07696	3.81847	3.63797	4.125	4.25106	4.08141	3.67799	3.87839	4.22117	3.99785	4.01491	3.58438	3.53983	3.7942	3.91454	3.85693	0.677401	0.11999	-0.359999	-0.222904	0.322926	-0.31278	0.83774	-0.08595	0.038972	-0.282832	-0.260269	-0.185634	-0.236152	-0.497028	-0.138163	-0.084198	-0.306633	-0.140922	-1.07389	-0.411078	-0.177135	0.198634	-0.046364	0.044712
13341803	AT1G18530	5.28712	5.39859	5.51588	4.78094	5.8326	5.76339	5.98457	6.05614	5.01523	4.72433	4.9803	4.44071	5.42321	4.99044	4.95618	5.36107	5.18235	4.67447	5.29448	5.44156	5.03116	5.00842	5.26622	5.18592	0.13609	-0.408154	-0.559705	0.580132	-0.650246	-1.08892	0.697448	0.657549	-0.500656	-0.056605	-0.852293	-1.32268	-0.128728	0.451126	0.074983	-0.352645	0.083872	0.51145	-0.826176	-0.206423	0.575639	-0.29604	0.936165	1.83413
13342085	AT1G19086	3.94552	3.63726	3.38351	3.67696	3.51056	4.10384	3.23418	4.22342	3.78217	3.67696	3.8196	3.61978	3.57178	3.93342	3.44467	4.37112	3.505	3.90726	3.66174	3.9185	3.63501	3.7032	3.71397	3.6998	-0.373743	0.296155	0.061165	0.694165	-0.005565	-0.196578	-0.711341	0.58616	0.398657	0	0.309038	-0.484061	0.089959	-0.014917	0.190337	-0.667923	0.208973	-0.207465	0.8013	-0.601077	-0.20832	-0.667923	-0.100065	0.276596
13342343	AT1G19710	6.87384	6.20656	6.27666	6.751	6.58042	6.66627	6.27666	6.25117	6.6979	6.87199	6.55072	6.76941	6.98156	6.86072	6.7849	6.96597	6.76098	6.95274	6.53034	6.88129	6.71716	6.87467	6.68895	6.75766	0.107724	0.654158	0.508247	0.214969	0.180563	0.286468	-0.597183	0.04461	0.421242	0.120989	-0.029706	0.103137	-0.451221	0.020577	-0.067739	-0.091299	-0.072034	-0.195079	0.145962	-0.024033	-0.488981	-0.212288	-0.042328	-0.298216
13342604	AT1G20470	5.24566	5.14622	5.50185	6.52963	7.09172	6.77587	5.9476	5.59433	5.34441	5.49614	6.8854	6.21254	6.61237	6.44597	5.95977	6.83678	7.26069	7.44589	6.26187	6.768	6.40813	6.33913	6.99615	6.99734	1.36671	1.29975	0.457925	0.30715	0.168969	0.670019	0.701942	0.448111	-0.157434	-1.03348	-0.206319	-0.563336	-0.350491	0.322026	0.44836	-0.497643	-0.264544	-0.448551	-1.05243	-0.126085	0.605794	0.535842	-0.058225	0.114785
13342666	AT1G20680	4.17457	4.22001	4.03702	4.70611	4.17319	4.70614	3.56742	4.87488	3.53569	4.07215	3.71737	4.44795	4.57374	4.28006	3.85554	4.54324	4.47646	4.06775	4.44408	3.71237	3.57072	4.0392	4.30744	4.19302	0.399165	0.060044	-0.181473	-0.162877	0.303275	-0.638393	-0.607148	0.654866	-0.501322	-0.633963	-0.455816	-0.258196	-0.129658	-0.567688	-0.284822	-0.504041	-0.169021	0.125275	0.47749	-1.22255	0.2165	0.129922	0.286795	0.383471
13342862	AT1G21090	6.44243	6.76237	6.56259	6.62103	6.48211	6.55071	5.84481	6.40206	6.23121	6.65778	6.11534	6.25942	6.61053	6.3324	6.70414	7.15872	6.79539	6.8158	6.60806	6.78444	6.8947	6.77428	6.61402	6.59446	0.168104	-0.429971	0.141542	0.537694	0.313276	0.265089	-0.59761	-0.360309	-0.331387	0.036748	-0.36677	-0.291291	-0.002473	0.45204	0.190565	-0.384448	-0.181369	-0.221345	0.595137	0.812349	0.521952	-0.421196	0.185401	0.069946
13342911	AT1G21245	3.64464	3.71278	3.38357	3.39158	3.93046	3.46937	2.97668	3.66937	3.65017	3.60385	3.46937	3.29195	4.56936	4.06862	4.61469	3.92242	3.7143	4.4697	4.3545	3.98411	4.49241	4.52548	4.13582	4.08106	0.924717	0.355837	1.23112	0.530846	-0.21616	1.00033	-0.667965	-0.04341	0.266605	0.212278	-0.461094	-0.177417	-0.214856	-0.084512	-0.122283	0.603064	0.421519	-0.388634	0.453109	-0.041102	-0.388888	0.390786	0.882613	-0.211217
13342963	AT1G21410	6.54719	7.23973	7.27219	7.37535	7.98291	8.03603	7.16363	7.51462	7.34658	7.32632	8.06297	8.39406	6.91026	7.43125	7.45609	7.37149	8.16148	8.17532	7.25139	7.69442	7.74469	7.52346	7.92062	8.4969	0.363064	0.19152	0.183893	-0.003857	0.17857	0.139285	0.616437	0.274898	0.074388	-0.04903	0.080059	0.358025	0.341135	0.263174	0.2886	0.151967	-0.240865	0.321585	-0.275302	-0.011724	0.214212	0.200997	-0.320924	-0.03644
13343092	AT1G21722	3.99105	4.83427	5.27008	4.54425	4.03668	4.43355	4.99724	5.93042	4.18944	4.45861	4.0659	4.95832	4.97164	4.87386	4.26116	4.29162	4.58427	4.55802	4.65086	4.07808	4.18873	4.1887	5.14633	4.53282	0.980587	0.039591	-1.00892	-0.252626	0.547586	0.12447	1.00619	1.09615	-1.08063	-0.085643	0.029222	0.524773	-0.320778	-0.795781	-0.072428	-0.102921	0.562063	-0.025201	-1.32696	-1.89193	1.00821	-0.017278	0.532841	-0.549974
13343261	AT1G22090	2.77622	3.05266	3.51742	3.05266	2.70237	3.16434	3.67402	3.05266	2.45677	2.8353	3.10948	3.08977	3.05266	3.20473	3.43337	2.94224	2.84041	3.34557	2.86223	2.97097	3.11944	3.40124	3.18393	3.25648	0.276436	0.152074	-0.084049	-0.110417	0.138032	0.181236	0.897799	0	-1.06066	-0.21736	0.40711	-0.074569	-0.190429	-0.233759	-0.313935	0.458999	0.343529	-0.089095	-1.08823	-0.233759	0.746723	0.676359	-0.063581	-0.014526
13343655	AT1G22990	3.16908	4.68925	4.58683	2.87632	3.08664	4.27762	4.35437	5.07949	3.23152	3.06789	3.7038	4.86556	2.76913	3.42963	2.9596	2.34883	2.87041	3.0125	2.73425	2.81006	2.89521	3.34138	2.82234	2.9748	-0.399952	-1.25961	-1.62722	-0.527488	-0.216231	-1.26512	1.18529	0.390249	-1.35531	0.191574	0.617157	0.587947	-0.034881	-0.619579	-0.064393	0.992554	-0.048069	-0.037699	-1.22017	-1.00983	1.29092	0.80098	-0.665226	-0.625646
13343778	AT1G23210	3.9742	3.67571	3.46348	3.61305	3.58597	3.52188	3.18629	3.46326	3.60226	3.608	3.2648	3.59337	3.92583	3.42429	3.76671	4.25633	3.67077	4.04346	4.01714	3.91692	3.94327	3.92285	3.76583	3.44713	-0.048374	-0.251419	0.303226	0.643288	0.084797	0.521577	-0.787906	-0.212446	0.138778	-0.005043	-0.321175	0.071489	0.09131	0.492631	0.176562	-0.333485	0.095058	-0.59633	0.879216	0.705077	0.037784	-0.328442	0.416233	-0.667819
13343835	AT1G23450	5.36815	6.13884	6.10298	6.30207	4.91367	6.32963	5.98165	6.74715	6.05484	6.21876	5.45507	5.7467	6.24195	6.07644	6.63042	6.24596	5.56411	5.81666	6.1082	6.31957	6.22029	5.99634	6.22688	6.31814	0.8738	-0.062397	0.527441	-0.056107	0.650436	-0.512968	0.613493	0.608312	-0.048139	-0.083314	0.541394	-0.582924	-0.133748	0.243134	-0.41013	-0.249628	0.662776	0.501484	-0.747241	-0.365178	-0.361991	-0.166314	0.121382	1.08441
13344231	AT1G24530	8.52314	6.58607	6.109	6.83127	6.27774	5.4322	7.94651	6.94726	6.60438	6.65804	5.26559	5.65652	5.81319	5.37488	5.08617	5.0884	5.30451	4.51579	5.68493	5.60376	5.24869	5.38925	4.80575	4.93987	-2.70995	-1.21118	-1.02283	-1.74287	-0.973234	-0.916406	-0.576631	0.361197	0.495386	-0.17323	-1.01215	0.224322	-0.128258	0.228879	0.162524	0.300845	-0.49876	0.424073	0.448373	-0.132318	-0.332862	0.474075	0.513395	0.199751
13344307	AT1G24735	5.80724	5.46804	4.84614	5.92762	6.02626	6.30309	4.97404	4.87165	4.72093	5.97589	6.11563	5.99841	4.80786	4.8113	4.43939	4.98925	4.89482	5.1776	4.2203	4.63067	4.42979	4.99408	4.76646	4.8958	-0.999375	-0.656736	-0.406747	-0.938362	-1.13144	-1.12549	-0.833192	-0.596393	-0.125205	0.048273	0.089373	-0.304673	-0.587558	-0.180637	-0.009606	0.004822	-0.128365	-0.281793	0.245634	0.415756	0.115599	-0.043451	-0.217738	0.02288
13344503	AT1G25460	4.50913	3.70444	3.51742	3.21641	3.38597	3.40592	3.74832	3.51648	3.92696	3.34865	3.78007	3.76537	4.22182	4.17016	4.1999	3.6476	4.08035	3.64211	3.78007	4.4621	4.55816	3.78007	4.09252	4.25282	-0.287307	0.465721	0.682479	0.431195	0.694377	0.236188	-0.760809	-0.187959	0.409532	0.13224	0.394094	0.359445	-0.441758	0.291937	0.358257	0.132464	0.012173	0.610711	0.319051	0.479896	-0.051275	0.000224	-0.381921	0.251266
13344824	AT1G26773	3.26925	4.67579	3.89559	3.48555	4.10653	4.95698	4.54132	4.69318	4.58817	4.41421	3.57954	3.75023	3.55354	3.51112	3.96744	4.28704	3.62399	4.27533	3.75335	3.2079	3.60781	3.53371	4.1157	4.40985	0.284295	-1.16467	0.071849	0.801487	-0.482538	-0.68165	1.27208	0.017388	0.69258	0.928659	-0.526987	-1.20675	0.199808	-0.303223	-0.359628	-0.753324	0.491715	0.134519	-1.07227	-0.320611	-1.05221	-1.68198	1.0187	1.34127
13344994	AT1G27135	3.8668	3.90073	3.84399	3.54566	3.61549	4.0826	3.18926	4.0742	3.36934	3.30368	3.49041	3.48181	4.00391	3.52202	4.3334	3.59703	3.72899	4.17521	3.52859	3.65016	3.91868	3.36208	3.48179	3.63204	0.137107	-0.378716	0.489411	0.051376	0.113505	0.092601	-0.677544	0.173471	-0.474653	-0.241973	-0.125079	-0.600792	-0.475321	0.128146	-0.414724	-0.23495	-0.247204	-0.543169	0.202223	-0.045325	0.059929	0.007023	-0.122125	0.057623
13345057	AT1G27270	3.73321	3.32294	3.028	2.92267	3.04116	3.09706	2.67119	2.78398	2.83979	3.11889	2.86239	3.00884	2.88678	3.09156	3.25159	2.42473	2.48743	3.59922	3.49175	3.05927	2.90936	2.90936	2.90936	3.20241	-0.84643	-0.231375	0.223593	-0.497936	-0.553723	0.502164	-1.06202	-0.538958	-0.188203	0.196222	-0.178766	-0.088218	0.604975	-0.032287	-0.342231	0.484627	0.421925	-0.396814	1.667	0.506671	-0.154028	0.288405	0.600691	-0.308596
13345753	AT1G29179	3.56284	3.93516	3.64037	3.92178	2.91211	4.03184	2.6187	3.57687	2.94962	3.143	3.1561	3.33876	3.69136	3.92897	3.81863	3.28972	4.11657	3.61272	3.30689	3.57687	3.4794	3.93221	3.57687	3.57687	0.12852	-0.00619	0.178264	-0.632059	1.20446	-0.419121	-0.944136	-0.358291	-0.690753	-0.778781	0.243991	-0.693078	-0.384464	-0.352101	-0.339231	0.642488	-0.539698	-0.035848	0.559672	0.00619	0.351522	1.42127	-0.783689	0.65723
13345782	AT1G29270	5.72244	4.16003	4.42217	3.79566	3.58764	4.06578	3.96887	3.86437	4.52049	3.95024	3.79261	3.86521	4.05465	4.15842	4.21725	4.29296	4.83092	4.32989	4.17921	4.33242	5.13948	4.31615	4.35939	4.05013	-1.66779	-0.001615	-0.204923	0.497301	1.24329	0.264107	-1.75357	-0.295662	0.098316	0.154582	0.204968	-0.200576	0.124562	0.174008	0.922224	0.023187	-0.471535	-0.279763	1.87813	0.46967	0.823908	-0.131395	-0.676503	-0.079187
13345792	AT1G29290	5.09599	5.03348	5.11408	4.59374	4.09766	3.44026	5.82084	4.99799	5.64615	5.50283	3.98505	5.28555	7.04659	6.02574	6.00967	5.81547	5.00422	4.98166	7.17886	7.04238	6.54353	6.66529	5.34094	6.33523	1.9506	0.992265	0.895589	1.22173	0.906556	1.54139	0.724851	-0.035485	0.532069	0.909096	-0.112607	1.84529	0.132266	1.01664	0.533857	0.84982	0.336721	1.35358	-0.592585	1.05212	0.001788	-0.059276	0.449328	-0.491712
13345884	AT1G29570	5.87505	5.96409	6.18764	5.61618	5.09284	6.41905	5.18412	6.26643	5.16583	5.44974	4.77199	6.39601	5.0427	6.30527	5.41906	5.64401	4.87875	5.59163	5.36191	4.83694	4.83204	4.95349	5.40396	5.5962	-0.832355	0.341178	-0.768588	0.027823	-0.214089	-0.82742	-0.69093	0.302341	-1.02181	-0.166444	-0.320851	-0.023037	0.319214	-1.46833	-0.587012	-0.690513	0.525208	0.004574	1.01014	-1.77067	0.434803	-0.524069	0.846059	0.027611
13345894	AT1G29580	3.92678	4.80158	4.29922	3.92896	4.6609	4.51327	4.59806	4.59448	3.89023	3.46046	3.91539	4.74828	3.93065	4.27522	3.35154	4.05239	3.74177	4.01004	3.54169	3.82275	3.96896	4.06097	3.72359	4.19286	0.003866	-0.526361	-0.947678	0.12342	-0.919123	-0.50323	0.671278	-0.207096	-0.408988	-0.468508	-0.745502	0.235018	-0.388956	-0.452463	0.617422	0.008581	-0.018185	0.182823	-1.06023	-0.245367	1.02641	0.477089	0.727317	-0.052195
13346095	AT1G30100	4.27885	4.72134	4.71289	4.97941	4.05352	4.45506	5.02232	4.1679	4.09716	4.33983	4.67327	4.55008	4.88337	4.68959	4.66915	5.16295	4.95717	4.62105	5.4015	4.57423	4.91389	4.90438	4.05205	4.95473	0.604519	-0.031754	-0.043743	0.18354	0.903643	0.165989	0.743474	-0.55344	-0.615737	-0.639584	0.619749	0.095023	0.518135	-0.115358	0.244739	-0.258571	-0.905119	0.333683	-0.225339	0.438082	0.860476	0.381013	-1.52487	0.23866
13346468	AT1G30740	3.70726	2.99572	3.09512	2.84934	3.14545	2.75931	2.9988	3.41489	3.24648	3.12592	2.97845	2.73804	3.24028	3.14169	3.24197	3.05832	3.07115	3.17375	3.65753	3.28482	3.05772	3.07334	2.77126	3.25734	-0.466976	0.145973	0.146846	0.20898	-0.074306	0.414433	-0.708452	0.419165	0.15136	0.276584	-0.167006	-0.021278	0.417253	0.143122	-0.184243	0.015026	-0.299887	0.083592	1.1257	-0.276043	-0.335603	-0.261558	-0.132881	0.10487
13346482	AT1G30795	5.73113	6.88246	7.30757	6.58985	6.08343	7.51088	6.33554	7.61019	6.33355	6.52162	6.10258	6.89049	6.01343	5.72335	6.46888	6.20015	6.43413	6.51811	6.34839	6.25903	4.16897	5.45068	7.16884	5.92439	0.282306	-1.1591	-0.838682	-0.389696	0.350698	-0.992762	0.604419	0.727734	-0.974017	-0.068228	0.019151	-0.620384	0.334953	0.53567	-2.29992	-0.749466	0.734714	-0.593719	-0.269466	-0.192064	-1.3259	-0.681238	0.715563	0.026665
13346661	AT1G31290	5.11402	4.64683	4.8175	4.37057	4.5266	3.87177	4.40092	4.70873	4.79298	4.84452	4.4364	4.50179	5.76488	5.1273	5.93937	5.56772	5.36418	5.53333	5.3055	5.23678	5.59918	5.43105	5.397	6.02688	0.650853	0.480468	1.12187	1.19715	0.837573	1.66156	-0.713099	0.061893	-0.024521	0.473942	-0.090203	0.630023	-0.459373	0.10948	-0.340195	-0.136669	0.032824	0.49355	0.253726	0.047587	-0.315674	-0.610611	0.123027	-0.136473
13346775	AT1G31690	6.05618	6.28747	7.68386	7.42345	5.21205	6.5974	5.11032	5.98712	7.60681	7.64885	5.96744	7.02735	6.24408	6.55096	8.28859	8.42735	5.87779	6.62047	6.24595	6.54167	8.37054	8.41982	6.32719	6.89847	0.187903	0.263485	0.604727	1.00391	0.665745	0.023073	-0.945855	-0.300352	-0.077054	0.225402	0.755395	0.42995	0.001866	-0.009283	0.081949	-0.007536	0.449395	0.277999	0.947721	0.291069	0.159003	-0.232938	-0.306	-0.151951
13347049	AT1G32337	4.46936	4.36006	3.75081	4.6993	4.01228	4.91232	5.05417	4.32435	3.80883	4.21393	3.54165	3.58206	5.31998	4.50649	4.43604	4.42871	5.21782	4.92482	5.33433	4.46387	4.29153	4.27375	3.80572	4.78204	0.850622	0.146423	0.685229	-0.270586	1.20554	0.012496	0.584805	-0.035713	0.05802	-0.485366	-0.470635	-1.33027	0.014349	-0.042621	-0.144511	-0.154955	-1.4121	-0.142779	-0.570456	-0.006908	-0.202531	0.330411	-0.94147	1.18749
13347193	AT1G32730	6.00211	6.10716	6.40637	6.36738	6.38314	6.38314	6.60511	6.00538	6.24468	6.05725	6.52768	5.97509	6.85696	6.19606	6.34007	6.76856	6.55396	6.66283	6.4574	6.50812	6.31256	6.38314	6.38314	6.50992	0.854842	0.088893	-0.066301	0.401178	0.170817	0.279694	0.602997	-0.101784	-0.161686	-0.310127	0.144542	-0.408053	-0.399558	0.312066	-0.027509	-0.385418	-0.170817	-0.152915	-1.00256	0.41385	0.134177	-0.075291	-0.315359	0.255138
13347236	AT1G32910	4.0652	4.53493	4.69505	4.46661	4.38957	4.81217	4.68012	4.49249	4.32483	4.53869	4.86476	4.2107	4.44102	3.81219	4.19642	4.20606	3.93492	4.24431	4.631	4.72668	4.29987	4.5306	4.44102	4.39141	0.375821	-0.722734	-0.498626	-0.260546	-0.454652	-0.567858	0.614917	-0.04244	-0.370216	0.072077	0.475188	-0.601464	0.189984	0.914487	0.103449	0.324536	0.506103	0.147102	-0.424933	0.956927	0.473665	0.252459	0.030915	0.748566
13347295	AT1G33010	3.60437	4.1409	4.20873	4.28634	3.4097	5.01852	4.32641	4.68336	3.88515	4.20873	3.85262	4.09617	4.28481	4.23614	4.38265	4.52467	3.91931	4.01469	3.80474	3.82338	2.9084	3.72253	4.32867	4.15602	0.68044	0.095236	0.173923	0.23833	0.509611	-1.00383	0.722041	0.542457	-0.323579	-0.077614	0.442924	-0.922344	-0.480065	-0.412754	-1.47425	-0.802142	0.409364	0.141334	-1.20211	-0.955211	-1.15067	-0.724528	-0.03356	1.06368
13347325	AT1G33090	2.59389	2.91342	3.04914	3.51891	2.82392	3.18811	3.47082	2.82591	2.76867	2.8907	2.57274	2.68634	2.68076	3.12085	3.03561	3.80021	2.94098	3.00603	2.59453	3.7838	2.8764	3.23167	3.20359	3.58918	0.086875	0.20743	-0.013528	0.281301	0.117056	-0.182072	0.876932	-0.08751	-0.280468	-0.628203	-0.251182	-0.501768	-0.08623	0.662941	-0.159215	-0.568542	0.262607	0.583149	-0.963162	0.750451	0.121253	0.059661	0.513789	1.08492
13347373	AT1G33220	3.96147	4.05225	4.20233	3.92587	4.12366	5.05946	2.98658	3.86893	2.8837	3.88719	3.67692	4.18252	4.25901	3.8474	3.30764	4.26941	3.42019	3.68564	4.11768	4.10269	3.75771	3.70623	4.63802	3.35077	0.297545	-0.204852	-0.894692	0.343542	-0.703472	-1.37382	-0.974889	-0.183317	-1.31863	-0.038678	-0.446745	-0.876936	-0.141329	0.255288	0.45007	-0.563183	1.21783	-0.334871	0.83356	0.438605	1.7687	-0.524505	1.66457	0.542065
13347701	AT1G34180	6.51227	6.46415	6.23886	5.65469	5.9127	6.05893	5.66314	5.79176	6.89073	5.9913	5.86834	6.70512	8.77669	8.57116	8.47324	8.63448	8.56882	8.34739	8.95189	8.72407	8.31537	8.69043	8.52931	8.58804	2.26442	2.10701	2.23438	2.97979	2.65612	2.28846	-0.849129	-0.672394	0.651866	0.336609	-0.044353	0.646193	0.175201	0.152904	-0.157869	0.055956	-0.039505	0.240648	1.02433	0.825298	-0.809735	-0.280653	0.004848	-0.405545
13348085	AT1G35515	3.12714	2.87645	3.12714	2.96149	2.95438	3.31215	4.53204	3.28556	3.02485	2.92724	3.72789	3.32044	3.4563	3.89058	3.53871	2.86889	2.68814	3.0279	3.62837	3.38403	3.14112	3.59415	3.12808	2.65707	0.329156	1.01414	0.411568	-0.092595	-0.266242	-0.284251	1.40489	0.409117	-0.10229	-0.03425	0.773509	0.008293	0.172075	-0.506548	-0.397594	0.72526	0.439935	-0.370828	-1.23282	-0.915665	-0.295304	0.75951	-0.333574	-0.379121
13348198	AT1G36030	2.68426	3.10887	2.84645	3.04823	3.00629	2.84041	3.45816	3.60525	2.66983	2.53578	3.59957	2.73358	3.19659	2.75279	2.87239	2.78763	2.65479	2.63808	2.60369	2.73779	2.66768	2.61368	2.71971	2.57745	0.512327	-0.356088	0.025943	-0.260603	-0.351497	-0.202329	0.773894	0.496371	-0.176624	-0.512446	0.59328	-0.106829	-0.592899	-0.014998	-0.204719	-0.173944	0.064916	-0.060628	-1.36679	-0.511369	-0.028095	0.338502	-0.528364	0.046201
13348428	AT1G41875	4.12304	4.11422	3.39239	3.53518	3.2528	3.41554	3.33462	3.65092	3.5478	3.57977	3.32693	3.48994	3.77042	3.48026	3.58645	4.28754	3.57657	3.53262	3.65908	3.89497	3.48173	3.43485	4.04702	3.46687	-0.352615	-0.633955	0.194061	0.752357	0.323762	0.117074	-0.788413	-0.463296	0.155405	0.044591	0.074128	0.074393	-0.111344	0.414709	-0.104725	-0.852693	0.470456	-0.065749	0.677069	0.878005	-0.26013	-0.897284	0.396328	-0.140142
13348519	AT1G42680	3.39709	2.30468	2.30468	2.31771	1.9691	1.9695	2.10358	2.41209	2.23899	2.10308	2.39755	2.80613	2.51365	2.68586	2.1699	2.14644	2.40276	2.2529	2.30468	2.06698	2.30468	2.26543	2.45483	2.30468	-0.883439	0.381181	-0.134784	-0.171266	0.433665	0.283397	-1.2935	0.107404	-0.065694	-0.214632	0.42845	0.836632	-0.208966	-0.618887	0.134784	0.118986	0.052071	0.051782	1.08454	-0.726291	0.200478	0.333618	-0.376379	-0.78485
13348588	AT1G43040	4.27389	3.45215	3.14097	3.40191	3.48487	2.92328	2.98248	3.66773	3.20931	2.93126	2.99433	3.66349	3.18788	3.78136	3.49326	3.33008	3.35241	3.29868	3.21448	3.64668	3.33611	3.85341	3.24148	3.10968	-1.08601	0.329208	0.352294	-0.071829	-0.132464	0.375405	-1.29141	0.215572	0.068339	-0.470647	-0.490545	0.740206	0.026601	-0.134687	-0.157152	0.523329	-0.110926	-0.189007	1.31801	-0.350259	-0.225491	0.993976	0.379619	-0.929213
13348590	AT1G43140	4.41244	4.23286	4.50825	4.33639	3.82891	4.57171	3.74747	4.40755	4.09887	4.38094	4.31764	4.21357	4.62567	4.59499	4.9564	4.40755	4.44355	5.07623	4.48098	4.73622	4.30136	4.19582	4.89742	4.67184	0.213225	0.36213	0.448146	0.071165	0.614638	0.504516	-0.664968	0.174689	-0.409386	0.044554	0.488729	-0.358144	-0.144685	0.141226	-0.655038	-0.211736	0.453871	-0.404382	0.520283	-0.033463	-0.245652	-0.25629	-0.034858	-0.046238
13348630	AT1G43330	2.73423	3.46241	2.93323	2.95075	2.99323	2.87206	3.57953	2.6773	3.192	2.46959	2.837	2.78164	3.30933	3.18807	3.39659	2.84041	3.32388	3.6668	3.28263	3.07665	2.60743	2.68336	3.23615	2.98157	0.575101	-0.27434	0.463357	-0.110349	0.330652	0.794738	0.845303	-0.785113	0.258762	-0.481165	-0.156229	-0.090421	-0.026703	-0.111419	-0.789159	-0.157045	-0.087729	-0.685227	-0.872006	0.673694	-1.04792	0.32412	0.0685	-0.594806
13348655	AT1G43680	4.00714	3.69425	4.29079	3.85163	3.11316	4.34886	3.40359	4.29179	3.20086	3.36399	3.709	4.13775	3.53494	3.87916	3.77411	3.45125	3.48792	4.21966	3.56288	3.12957	2.98716	2.84327	3.67233	3.82877	-0.472198	0.184914	-0.516684	-0.40039	0.374756	-0.1292	-0.603554	0.597544	-1.08993	-0.487648	0.595836	-0.211112	0.027933	-0.749589	-0.786943	-0.607973	0.184412	-0.390887	0.631487	-1.34713	0.30299	-0.120325	-0.411424	-0.179775
13348761	AT1G44050	3.59433	2.9263	3.18096	3.54615	3.0152	2.89105	2.92489	2.95555	3.17642	3.24425	3.32041	3.38992	3.55868	3.64318	3.60001	3.64822	3.01824	3.25003	3.1821	2.85724	3.51379	3.73534	3.50846	3.48795	-0.035652	0.71688	0.41905	0.102068	0.003038	0.358979	-0.669441	0.029248	-0.004538	-0.301908	0.3052	0.498876	-0.376578	-0.785942	-0.086221	0.087121	0.490215	0.237923	0.292863	-0.81519	-0.081683	0.389029	0.185015	-0.260953
13348763	AT1G44094	4.63727	4.39742	4.23935	4.90943	4.31567	4.65636	3.98625	5.0218	4.43448	4.86142	4.79198	4.94237	5.41036	4.79037	4.72236	4.88707	4.39965	4.79818	5.22417	4.62975	5.3983	4.7166	4.60226	4.53383	0.773089	0.392952	0.483003	-0.02236	0.083982	0.141819	-0.651027	0.624387	0.195131	-0.048011	0.476312	0.286009	-0.186197	-0.160623	0.675943	-0.170469	0.202605	-0.26435	0.46483	-0.78501	0.480812	-0.122458	-0.273707	-0.550359
13348799	AT1G44674	2.90038	4.17871	4.41437	4.43782	4.2672	3.26791	4.44601	4.3106	2.90728	3.55719	3.40849	3.78548	3.41445	3.75948	3.34476	3.26791	2.6458	3.19968	3.3324	2.95322	3.40849	2.86197	3.79021	3.13604	0.514072	-0.419234	-1.06961	-1.16991	-1.62139	-0.068233	1.54563	0.131883	-1.5071	-0.880627	-0.858709	0.517572	-0.082057	-0.806263	0.063731	-0.405938	1.14441	-0.06364	-1.62768	-0.938146	1.57083	0.474689	2.00312	-0.581212
13349003	AT1G45191	5.13699	5.77291	5.48532	5.89356	7.33166	7.89671	5.79773	4.54959	5.46502	5.74265	7.68752	8.66929	6.31827	6.27049	5.72065	6.25116	7.00483	7.01339	6.19298	5.76322	6.12906	6.47282	6.75019	6.63325	1.18128	0.497572	0.235325	0.357598	-0.326835	-0.883319	0.66074	-1.22332	-0.020298	-0.150913	0.355856	0.772577	-0.125287	-0.50727	0.408409	0.221653	-0.254641	-0.380137	-0.786027	0.716051	0.428707	0.372566	-0.610497	-1.15271
13349047	AT1G45236	4.88036	3.448	3.53494	2.56601	2.8658	2.82553	4.12175	3.40467	3.80791	3.5269	3.20445	3.56097	3.34612	4.61799	3.81308	3.4072	5.06708	3.64708	3.56003	3.94863	3.08928	4.51747	3.8095	2.96581	-1.53424	1.16999	0.278139	0.841195	2.20128	0.821552	-0.758613	-0.043338	0.272964	0.960893	0.338654	0.735442	0.213905	-0.669365	-0.7238	1.11027	-1.25758	-0.681267	0.972518	-0.626027	-0.996764	0.149376	-1.59623	-1.41671
13349262	AT1G47560	4.15215	4.51406	4.40211	4.95548	4.88986	3.81964	4.76433	4.08801	4.63945	4.75931	4.91299	3.93168	5.97231	5.3738	5.04111	5.29753	5.86338	5.7456	5.35117	5.28323	5.37882	5.34751	5.83521	5.88792	1.82015	0.859739	0.639003	0.342056	0.973514	1.92596	0.612179	-0.426049	0.237342	-0.196161	0.023128	0.112043	-0.621136	-0.090571	0.337709	0.049978	-0.02817	0.142321	-1.23331	0.335478	0.100367	0.246139	-0.051298	0.030278
13349327	AT1G47655	6.74448	7.21903	7.61607	7.51211	7.91075	7.04988	7.43051	7.1019	7.04124	7.27151	7.04113	5.84521	5.83043	6.45225	6.30929	6.18851	6.42044	6.32498	6.06508	5.61994	6.52158	6.55375	6.68759	4.92648	-0.914052	-0.766786	-1.30678	-1.3236	-1.49031	-0.724903	0.686032	-0.11713	-0.574827	-0.240595	-0.869626	-1.20467	0.234653	-0.832302	0.212288	0.365241	0.267145	-1.3985	-0.451379	-0.715172	0.787115	0.605836	1.13677	-0.193829
13349451	AT1G48130	3.02547	3.72038	3.42187	3.58041	3.50748	3.4694	3.61863	4.10442	3.43212	3.76947	3.36945	3.6633	3.88278	3.99681	3.46599	3.79794	3.49921	3.48205	3.6434	4.06691	3.87386	3.18532	3.70086	3.38296	0.857314	0.276434	0.044121	0.217531	-0.008265	0.012653	0.593163	0.384045	0.010253	0.189057	-0.138025	0.193904	-0.239383	0.070104	0.407868	-0.612619	0.201646	-0.099094	-0.832546	-0.313941	0.397615	-0.801676	0.339671	-0.292998
13349703	AT1G48640	4.55978	4.15035	4.56073	4.07552	4.35416	4.3173	3.88148	4.67824	4.31682	4.36177	4.03596	4.15267	5.14712	4.61936	4.36239	4.72516	4.36041	4.69397	4.9693	5.17534	5.09702	5.10776	4.34673	4.88565	0.587331	0.469008	-0.198337	0.649642	0.006248	0.376662	-0.678309	0.52789	-0.24391	0.286248	-0.318209	-0.164636	-0.177811	0.555984	0.734625	0.382601	-0.013681	0.191687	0.500498	0.028094	0.978535	0.096353	0.304528	0.356323
13349716	AT1G48720	4.62755	5.98373	6.81265	5.51846	5.81745	6.27689	5.46503	5.86681	3.91998	4.32602	4.66137	5.55529	3.75702	2.68586	4.96913	3.84657	3.34743	5.50087	4.21118	5.76044	3.65248	5.49021	3.56147	3.94814	-0.870529	-3.29786	-1.84352	-1.6719	-2.47002	-0.776024	0.837478	-0.116912	-2.89267	-1.19245	-1.15608	-0.721604	0.454158	3.07457	-1.31665	1.64365	0.214042	-1.55273	-0.38332	3.19149	1.57602	2.83609	1.37012	-0.831124
13349770	AT1G48912	6.34382	6.72704	7.12952	6.27997	6.65007	6.29129	6.93565	6.96889	6.17917	6.01621	6.24519	5.67671	6.89268	7.10138	6.81651	6.80506	6.6855	6.26046	6.74035	6.5175	6.64726	6.53153	6.18234	6.24601	0.548869	0.374344	-0.313007	0.525093	0.035435	-0.030829	0.591838	0.241844	-0.950344	-0.263754	-0.404874	-0.614587	-0.152334	-0.583883	-0.169254	-0.273527	-0.503167	-0.014452	-0.744172	-0.825727	0.78109	-0.009773	-0.098293	0.600135
13349859	AT1G49150	3.80602	4.714	4.71521	4.47143	5.90703	5.24062	4.50569	5.12612	3.98655	5.2049	5.65648	4.85394	4.63972	4.67515	4.08631	4.83935	5.09182	5.03831	5.10591	4.45034	3.96538	5.88275	4.6714	4.84549	0.833697	-0.038845	-0.628896	0.367923	-0.815219	-0.202309	0.699672	0.412121	-0.728665	0.733473	-0.25055	-0.386679	0.466195	-0.224816	-0.120935	1.0434	-0.420413	-0.192819	-0.233477	-0.636937	0.60773	0.309924	-0.169863	0.19386
13350252	AT1G50070	4.59265	4.61479	4.73686	4.31339	4.88589	4.56648	4.01872	4.95707	4.39369	4.1579	4.56313	4.22236	4.47247	4.76703	4.39829	4.85704	4.39071	4.85985	4.72354	4.52253	4.73496	4.15594	4.74998	4.41005	-0.120185	0.152239	-0.338563	0.543648	-0.495178	0.293375	-0.573932	0.342276	-0.343169	-0.155488	-0.322756	-0.344119	0.251069	-0.244498	0.336666	-0.701097	0.359268	-0.449805	0.825001	-0.586774	0.679835	-0.545609	0.682024	-0.105686
13350254	AT1G50070	4.59265	4.61479	4.73686	4.31339	4.88589	4.56648	4.01872	4.95707	4.39369	4.1579	4.56313	4.22236	4.47247	4.76703	4.39829	4.85704	4.39071	4.85985	4.72354	4.52253	4.73496	4.15594	4.74998	4.41005	-0.120185	0.152239	-0.338563	0.543648	-0.495178	0.293375	-0.573932	0.342276	-0.343169	-0.155488	-0.322756	-0.344119	0.251069	-0.244498	0.336666	-0.701097	0.359268	-0.449805	0.825001	-0.586774	0.679835	-0.545609	0.682024	-0.105686
13351046	AT1G51915	3.38847	3.28973	3.1858	4.00321	3.33109	3.11475	4.24048	3.48965	4.08653	4.10106	3.04241	3.41442	3.26082	3.10436	3.26069	3.14979	2.94766	3.2938	3.55213	3.36782	3.86531	3.2066	3.13435	3.33611	-0.127648	-0.185367	0.074899	-0.853424	-0.383429	0.179051	0.852013	0.199925	0.900735	0.09785	-0.288686	0.29967	0.291308	0.263462	0.604618	0.056814	0.186682	0.042303	-0.560705	0.063537	-0.296117	-0.041036	0.475368	-0.257367
13351051	AT1G51920	7.14461	7.03732	6.30562	6.54791	6.77046	5.93316	7.88764	7.77056	7.67952	6.68065	6.67856	7.00197	8.19642	7.11461	6.36877	6.73465	6.55754	6.16373	8.67382	8.0092	7.53173	7.48223	7.1716	6.53516	1.05181	0.077295	0.063144	0.186745	-0.212924	0.230571	0.743031	0.733238	1.3739	0.132743	-0.091898	1.06881	0.477397	0.894588	1.16296	0.747574	0.614063	0.371434	-0.265634	0.16135	-0.210932	0.614831	0.705961	-0.697377
13351604	AT1G53345	7.189	6.7141	6.56467	5.94263	6.14836	5.76297	6.31989	6.09633	6.41176	6.05391	5.84322	5.89136	6.32754	6.5661	5.8309	5.54641	5.69609	5.66793	6.07955	6.47728	6.06116	5.37754	5.56429	5.17635	-0.861458	-0.147999	-0.733774	-0.396223	-0.452264	-0.09504	-0.86911	-0.617773	-0.152907	0.111272	-0.305135	0.128395	-0.247992	-0.088825	0.230269	-0.168874	-0.131803	-0.491572	0.621118	0.528948	0.383176	-0.280146	0.173332	-0.619967
13351613	AT1G53360	3.30777	3.68857	3.27074	3.83002	3.35733	3.60632	3.98059	3.66583	3.08737	3.1854	3.18209	3.82308	4.07547	4.19857	3.82055	3.60851	3.7098	3.69579	3.98999	3.6558	3.57421	3.72063	3.70944	3.68499	0.767708	0.510004	0.54981	-0.221506	0.352475	0.089477	0.672821	-0.022739	-0.183372	-0.644621	-0.175243	0.21676	-0.085488	-0.54277	-0.246338	0.112121	-0.00036	-0.010803	-0.758309	-0.520031	-0.062966	0.756742	0.174883	-0.227563
13351689	AT1G53490	5.25375	5.7632	6.67547	5.67366	4.91443	5.11941	6.19864	7.16554	6.14418	5.90288	4.93123	5.64995	6.66793	6.49125	6.28443	6.08638	6.241	6.04411	6.38781	6.5066	6.51574	6.02203	5.78167	5.92236	1.41418	0.728054	-0.391047	0.41272	1.32657	0.924707	0.944894	1.40235	-0.531292	0.229224	0.016797	0.530542	-0.280113	0.015348	0.231319	-0.064346	-0.459327	-0.121749	-1.22501	-1.387	0.762611	-0.29357	-0.476124	-0.652291
13351712	AT1G53542	5.02291	5.13261	5.03752	4.28064	4.75744	5.56598	4.28754	4.55874	5.48067	4.53342	5.55251	4.83125	6.0083	6.23787	5.975	5.56637	5.64736	6.88877	6.03609	5.94218	6.33885	6.06607	6.21882	6.79056	0.985396	1.10526	0.937474	1.28573	0.889925	1.32278	-0.735364	-0.573864	0.443144	0.252784	0.795075	-0.734734	0.027786	-0.295688	0.363854	0.499708	0.571462	-0.098206	0.76315	0.278176	-0.07929	0.246924	-0.223613	0.636528
13351748	AT1G53600	5.5203	6.90152	6.84053	6.80794	5.86805	5.95267	6.12622	7.06851	6.34112	5.95174	5.41935	6.25517	5.46843	6.12405	6.4169	6.02936	5.12844	4.99835	5.64311	6.02242	6.05156	5.56421	5.53277	5.39959	-0.051873	-0.777472	-0.423626	-0.778582	-0.739612	-0.954327	0.605917	0.166991	-0.499408	-0.856205	-0.448699	0.302499	0.174682	-0.10163	-0.365343	-0.465156	0.404327	0.401248	-0.431235	-0.268621	0.134065	0.391049	0.853026	0.098749
13351893	AT1G53940	4.22941	3.64877	3.81336	3.15862	3.73043	3.16785	3.6292	3.95808	3.08129	3.71177	3.59855	3.68795	2.94691	3.70158	3.47888	3.43026	3.62531	3.38082	3.48223	3.51266	3.49131	3.305	3.01257	2.80961	-1.28249	0.052814	-0.334482	0.271644	-0.10512	0.212964	-0.600207	0.309314	-0.732069	0.55315	-0.131881	0.520092	0.535317	-0.18892	0.012434	-0.125259	-0.612734	-0.571213	1.13552	-0.498234	0.744503	-0.678409	-0.480853	-1.0913
13351992	AT1G54230	2.37602	3.2385	2.75055	3.49085	3.51952	2.83759	3.1035	2.7819	2.96722	2.75442	2.64771	3.42403	2.60522	2.61398	2.59995	2.97463	2.66322	3.00811	3.08946	2.61128	2.56364	2.71537	2.52142	2.62537	0.229201	-0.62452	-0.150595	-0.516226	-0.856306	0.170527	0.727483	-0.456605	0.216672	-0.736435	-0.871813	0.58644	0.484246	-0.002708	-0.036314	-0.259257	-0.141798	-0.382739	-0.243237	0.453897	-0.252986	0.477178	0.730015	-0.969179
13352620	AT1G55570	2.84465	3.28329	3.03582	3.33529	3.59516	3.11998	3.69326	3.59309	3.19841	3.5872	3.2179	3.20931	3.22322	3.56786	3.54727	2.93187	3.68085	3.86999	3.70267	3.05394	3.20645	3.34904	3.46423	3.37882	0.378573	0.284575	0.511448	-0.403425	0.085687	0.750011	0.848618	0.309804	0.162583	0.251909	-0.37726	0.089324	0.479453	-0.513924	-0.340821	0.417176	-0.216616	-0.491176	-0.369165	-0.823728	-0.503404	0.165267	0.160644	-0.5805
13352896	AT1G56418	3.8825	5.0729	4.44102	5.25916	3.73387	4.50085	4.52454	5.21592	4.76607	4.34804	4.30739	4.58035	4.75805	5.029	5.844	5.73403	6.07382	5.20604	4.84363	4.61457	4.70641	5.03423	5.52826	5.06564	0.875552	-0.043902	1.40298	0.474867	2.33996	0.705189	0.642042	0.143019	0.325053	-0.91112	0.57352	0.079504	0.085579	-0.414421	-1.1376	-0.699796	-0.545563	-0.140391	-0.556463	-0.55744	-1.46265	0.211324	-1.11908	-0.219895
13352991	AT1G56600	5.88943	6.71254	7.25859	6.28471	9.07553	9.67059	6.51343	6.69777	6.88545	6.29982	9.15288	9.37837	5.95386	7.24462	6.96225	6.00449	8.94576	9.4446	5.84032	6.37308	6.49694	5.52765	8.57447	8.88142	0.064437	0.532088	-0.296338	-0.280216	-0.129769	-0.225989	0.624006	-0.014763	-0.373136	0.015116	0.07735	-0.292217	-0.113545	-0.87154	-0.465308	-0.476837	-0.371294	-0.563175	-0.737551	-0.856777	-0.092172	-0.491953	-0.448644	-0.270958
13353020	AT1G56690	7.21981	8.09183	8.23236	7.91521	6.4102	7.51621	6.52451	7.84519	7.80467	7.95716	7.14788	7.41485	7.09026	7.30328	7.55404	8.01934	6.90045	7.33572	6.61465	7.30968	7.58697	7.18604	7.11451	6.98723	-0.129555	-0.788545	-0.678323	0.104137	0.490252	-0.180491	-0.6953	-0.246638	-0.427692	0.041951	0.737679	-0.101361	-0.475601	0.006395	0.032931	-0.833301	0.214056	-0.348483	0.219699	0.253033	0.460623	-0.875252	-0.523623	-0.247122
13353065	AT1G57565	2.79131	3.31378	3.45627	3.15042	2.59329	3.26875	3.40907	3.00622	2.94208	2.63471	3.07509	3.56169	2.73453	3.04068	2.57127	3.19494	2.97098	3.41228	2.90657	2.7989	2.98043	3.04446	3.04658	2.68434	-0.056782	-0.273094	-0.885001	0.04452	0.377696	0.143537	0.61775	-0.307554	-0.514192	-0.515715	0.481806	0.292944	0.172034	-0.241781	0.409161	-0.150486	0.075597	-0.727946	-0.445716	0.065773	0.923353	0.365229	-0.406209	-1.02089
13353157	AT1G57835	3.21379	3.34824	3.07851	3.0072	3.90716	4.00477	2.5814	3.25632	3.35343	3.4504	3.54394	3.23175	3.24608	2.88976	3.01506	3.13571	3.08541	2.95639	2.94243	3.38101	3.18995	2.98514	2.93494	2.94183	0.03229	-0.458476	-0.063454	0.128512	-0.821748	-1.04838	-0.632389	-0.091915	0.274921	0.443197	-0.363213	-0.773017	-0.303653	0.491254	0.174896	-0.150572	-0.150465	-0.014559	0.328736	0.583169	-0.100025	-0.593769	0.212748	0.758458
13353275	AT1G58370	7.35536	6.92584	6.73779	7.34833	6.91595	4.99847	6.45388	6.81485	6.94222	7.53943	6.08079	4.93174	6.98752	6.91904	6.77587	6.6827	6.4311	5.74308	6.62603	6.49441	7.13034	6.7134	6.06922	5.78629	-0.367839	-0.006797	0.038082	-0.665624	-0.484848	0.744609	-0.901483	-0.110986	0.204432	0.1911	-0.835158	-0.066734	-0.361493	-0.424629	0.354468	0.030697	-0.361882	0.043211	0.53999	-0.313643	0.150036	-0.160403	0.473276	0.109945
13353297	AT1G58460	5.32479	3.85371	3.50532	4.5257	3.65679	3.19234	3.62898	4.14108	3.83468	3.21057	3.6633	3.54805	3.25455	3.30139	3.37974	3.8201	3.81084	3.08498	3.53048	3.86342	3.84887	3.23458	3.84073	3.36223	-2.07023	-0.552326	-0.125578	-0.705602	0.154055	-0.107362	-1.69581	0.287368	0.329359	-1.31513	0.00651	0.355713	0.275922	0.562031	0.469129	-0.585514	0.029892	0.277254	1.97173	0.274663	0.13977	0.729615	0.023382	-0.078459
13353308	AT1G58520	6.38859	7.31745	8.17884	8.11461	9.42555	9.67677	7.0051	7.10927	7.64307	8.00733	9.36748	9.39315	7.55807	7.60794	7.52342	8.06577	9.19778	9.33694	7.42929	7.13629	7.85158	7.73558	8.90304	9.07543	1.16948	0.290485	-0.655419	-0.048845	-0.227775	-0.33983	0.616512	-0.208178	-0.535771	-0.107282	-0.058074	-0.283621	-0.128779	-0.471645	0.32816	-0.330192	-0.294737	-0.261513	-0.745291	-0.263467	0.863931	-0.22291	-0.236663	0.022108
13353534	AT1G59725	3.49151	4.23124	3.98854	4.04679	4.25575	4.54065	4.44025	4.77575	3.50502	4.08469	4.33447	4.55924	4.72404	4.48777	4.36062	4.10012	3.89183	4.21603	4.0991	4.18529	3.79146	4.10255	4.09539	3.76589	1.23253	0.256528	0.372078	0.053335	-0.36392	-0.324618	0.948744	0.544507	-0.483521	0.037904	0.07872	0.018589	-0.624939	-0.302483	-0.569166	0.002424	0.20356	-0.450145	-1.57368	-0.84699	-0.085645	-0.03548	0.12484	-0.468734
13353768	AT1G60320	2.70732	3.09124	2.87566	3.43176	3.06895	3.62364	3.35608	3.15058	3.10079	2.89989	3.00618	3.26676	3.41687	4.21562	3.30509	3.77288	3.42207	3.0474	3.91484	3.89989	3.40685	3.3291	3.00723	3.04715	0.709547	1.12437	0.429436	0.341118	0.353119	-0.576237	0.648755	0.059334	0.225134	-0.531871	-0.062776	-0.356879	0.497972	-0.315723	0.101753	-0.443784	-0.414842	-0.000253	-0.150783	-0.375057	-0.123381	0.088087	-0.352066	0.356626
13353772	AT1G60400	3.15449	2.90632	2.39992	2.8119	2.58703	2.61633	2.57364	2.6167	2.80875	2.47261	2.50983	2.58921	3.57214	2.97009	3.09994	2.82587	3.01249	3.24546	3.25039	2.73513	2.89851	2.94699	3.04965	2.83513	0.41765	0.063769	0.700019	0.013972	0.425461	0.629134	-0.58085	-0.289621	0.408829	-0.33929	-0.0772	-0.027122	-0.321754	-0.234955	-0.201424	0.121114	0.037162	-0.410332	0.259096	0.054666	-0.610253	0.460404	0.114362	-0.38321
13353802	AT1G60500	3.29257	3.84367	3.78012	3.5845	3.90811	3.96039	3.88192	3.71142	3.21357	4.21672	3.37999	3.73659	4.12725	3.5439	3.79149	3.64119	3.692	3.71008	3.68301	3.63927	4.20799	3.67033	3.69506	3.76003	0.834673	-0.299776	0.011365	0.056689	-0.216116	-0.250308	0.589345	-0.13225	-0.566557	0.63222	-0.528122	-0.223804	-0.444243	0.095371	0.4165	0.029137	0.003061	0.049947	-1.03359	0.227621	0.983057	-0.603083	0.531183	0.273751
13353848	AT1G60720	5.44721	5.49864	5.09503	4.73161	5.02165	5.13981	4.80295	5.21889	4.56276	4.9673	4.88257	4.1939	5.4628	5.33028	5.01441	5.02031	5.7348	5.3232	5.04314	5.13826	5.13466	5.14168	5.051	5.16749	0.015589	-0.168358	-0.080617	0.288697	0.713142	0.183389	-0.644254	-0.279748	-0.53227	0.235689	-0.139079	-0.945914	-0.41966	-0.192012	0.120247	0.121372	-0.683792	-0.155714	0.224594	0.087736	0.652517	-0.114317	-0.544713	0.7902
13353906	AT1G60987	3.43573	3.35252	3.47866	3.60866	3.80565	3.85114	4.11621	3.64135	3.9441	3.65759	3.45995	3.3327	4.10781	3.63753	3.9006	3.73808	3.90005	3.83205	3.55589	3.88281	3.65837	4.2113	3.71707	3.75879	0.672073	0.285004	0.421941	0.129419	0.094394	-0.019089	0.680478	0.288834	0.465438	0.04893	-0.345708	-0.518447	-0.551916	0.245289	-0.242238	0.473217	-0.182983	-0.073262	-1.23239	-0.043545	-0.707676	0.424287	0.162725	0.445185
13353934	AT1G61050	3.66094	3.39088	3.42262	3.23856	3.20264	3.19463	3.03813	3.23445	3.51395	3.31392	3.52111	3.27364	3.29234	4.01375	3.72358	3.52111	4.11766	3.51408	3.52111	3.46455	3.77229	3.66915	3.4198	3.40695	-0.368602	0.62287	0.300964	0.282549	0.915022	0.319449	-0.622814	-0.156424	0.091325	0.07536	0.318475	0.079014	0.22877	-0.549196	0.048706	0.148033	-0.69786	-0.107128	0.851584	-0.392772	-0.042619	0.072673	-1.01633	-0.186142
13353970	AT1G61170	6.93877	7.01012	7.12452	8.2102	7.03753	6.79124	7.78519	6.98582	7.44591	7.57933	7.41133	7.39849	6.2763	6.81144	6.61675	7.3912	7.05587	6.46188	6.0209	5.84463	6.88417	6.75502	6.90667	6.11986	-0.662464	-0.198684	-0.507772	-0.818996	0.018337	-0.32936	0.846427	-0.024307	0.321391	-0.630866	0.373804	0.607246	-0.255398	-0.966813	0.26742	-0.636178	-0.149192	-0.342025	-1.10183	-0.942506	-0.053971	-0.005312	-0.522996	-0.949271
13354096	AT1G61470	4.06108	3.54602	4.65593	4.58526	4.73993	3.57754	3.34473	3.79209	3.82921	4.65541	4.18992	4.14333	3.94595	4.44074	4.92965	4.82972	3.67452	3.88865	4.0945	4.20827	3.39146	4.31141	3.90689	4.33392	-0.115125	0.89472	0.273718	0.244457	-1.06541	0.311115	-0.716344	0.246073	-0.826723	0.070146	-0.550011	0.565789	0.148554	-0.232472	-1.53819	-0.518313	0.232375	0.445265	0.864898	-0.478545	-0.711466	-0.588459	0.782386	-0.120524
13354110	AT1G61575	3.91737	4.57295	4.35729	4.2645	5.26224	4.51631	4.52432	4.32364	3.70484	4.17781	4.55867	4.08942	4.43846	3.99747	4.02331	4.22085	3.56624	3.91865	3.97929	4.13248	3.71513	4.10398	3.43389	4.18155	0.521086	-0.575484	-0.333981	-0.043645	-1.696	-0.597654	0.606951	-0.249314	-0.652444	-0.086682	-0.703571	-0.426889	-0.459166	0.13501	-0.30818	-0.116867	-0.13235	0.262898	-1.06612	0.384324	0.344264	-0.030185	0.571221	0.689787
13354187	AT1G61810	4.41878	3.46161	3.43736	3.41669	3.98404	3.79251	3.74104	2.97359	3.05689	3.31655	4.34432	5.73959	3.7647	3.77786	3.2437	3.84249	4.31366	3.77883	3.85038	3.71841	3.63548	3.63628	3.88121	4.40079	-0.654084	0.316253	-0.193659	0.425799	0.32962	-0.013676	-0.677746	-0.48802	-0.380467	-0.100143	0.360285	1.94709	0.085679	-0.05945	0.391778	-0.20621	-0.432449	0.621961	0.763425	0.42857	0.772245	-0.106067	-0.792734	-1.32513
13354516	AT1G62910	6.63084	6.03053	6.86915	6.13864	5.90238	6.41178	5.9181	6.35346	6.54053	7.18287	5.98711	6.08554	2.67041	2.6478	2.80139	3.54898	2.04764	2.71319	2.27516	3.05593	2.50809	2.6727	2.79265	3.03754	-3.96042	-3.38273	-4.06776	-2.58967	-3.85474	-3.69859	-0.712732	0.322929	-0.328621	1.04423	0.084727	-0.326242	-0.39525	0.408132	-0.293303	-0.876276	0.745005	0.324359	0.317482	0.085203	0.035318	-1.9205	0.660278	0.650601
13354754	AT1G63540	4.10714	5.81958	4.54087	4.73912	4.75864	5.31465	5.26267	5.99713	6.39944	5.07765	4.19032	3.69258	8.67637	9.16498	9.05011	8.79771	9.00218	8.99257	8.44188	8.99363	8.95647	8.77155	8.99443	9.58579	4.56923	3.3454	4.50924	4.05859	4.24355	3.67792	1.15553	0.177551	1.85857	0.338535	-0.568319	-1.62207	-0.234489	-0.171348	-0.09364	-0.026154	-0.007757	0.593228	-1.39002	-0.348899	-1.95221	-0.364689	0.560562	2.2153
13354970	AT1G64130	4.24411	3.80327	3.85454	4.62234	3.81521	4.13486	3.398	4.50445	3.99145	3.95525	4.17968	3.66036	3.45997	3.4394	3.62535	3.75488	3.42252	3.80327	3.75245	3.38922	3.59465	3.47183	4.11043	3.65197	-0.784138	-0.363867	-0.22919	-0.867465	-0.392691	-0.331592	-0.846106	0.701186	0.136908	-0.667095	0.364466	-0.474497	0.292478	-0.050179	-0.030696	-0.283051	0.687903	-0.1513	1.13858	-0.751365	-0.167604	0.384044	0.323437	0.323197
13355124	AT1G64540	4.18413	4.80102	4.50297	4.6761	4.57239	4.84898	4.79359	4.50399	4.09969	4.55761	4.49388	4.60201	4.502	4.70087	4.84935	4.40333	4.27959	4.79849	4.22097	4.53349	3.71123	4.88498	4.55423	4.19095	0.317874	-0.100149	0.346382	-0.272768	-0.292798	-0.05049	0.609463	-0.297027	-0.403279	-0.118487	-0.078508	-0.246966	-0.281032	-0.167386	-1.13813	0.481649	0.274639	-0.607537	-0.890495	0.129641	-0.734846	0.600136	0.353147	-0.360571
13355224	AT1G64690	5.63092	5.08447	5.68442	5.39607	5.71181	5.54262	4.82023	5.4006	5.10697	4.97037	5.37133	4.97781	3.92893	4.12025	3.87636	4.33097	4.02549	3.76797	4.13274	4.14364	4.14079	4.09313	3.93665	3.96678	-1.70199	-0.964218	-1.80805	-1.06509	-1.68632	-1.77465	-0.810693	0.316129	-0.57745	-0.425698	-0.340482	-0.564804	0.203818	0.023389	0.264425	-0.237838	-0.088832	0.198809	1.01451	-0.29274	0.841875	0.18786	0.25165	0.763613
13355287	AT1G64870	4.0967	4.56934	4.23727	4.28941	3.67342	4.64044	4.81222	5.35819	4.21955	4.3275	4.62252	4.49384	5.00283	4.69576	4.39174	4.97124	4.97594	4.59114	4.62345	4.04766	4.26972	4.26064	5.38267	4.67292	0.906133	0.126419	0.154473	0.681829	1.30252	-0.049303	0.715521	0.788845	-0.01772	0.038093	0.949099	-0.146602	-0.379377	-0.6481	-0.122024	-0.710595	0.406727	0.081783	-1.0949	-1.43694	-0.104304	-0.748688	-0.542372	0.228385
13355385	AT1G65210	4.54122	5.01358	4.71132	4.468	4.58143	5.38386	3.72413	4.90611	3.87047	4.54907	4.26543	5.87503	4.1741	3.70187	3.94025	3.48873	4.05624	4.04199	3.79558	2.97003	3.22351	3.38707	3.46943	3.57621	-0.367119	-1.31171	-0.771067	-0.979267	-0.525194	-1.34187	-0.817093	-0.10747	-0.840854	0.08107	-0.315998	0.49117	-0.378525	-0.731842	-0.71674	-0.101655	-0.586803	-0.465784	0.438568	-0.624372	0.124114	-0.182725	-0.270805	-0.956954
13355454	AT1G65300	3.89847	2.40765	3.34878	2.71413	2.96394	3.26791	2.96412	2.92527	3.7033	2.4204	2.88678	3.34922	6.23381	6.36661	5.84788	6.2009	6.51915	6.96405	6.23075	6.42726	5.92819	5.24036	6.3727	6.60941	2.33534	3.95896	2.4991	3.48677	3.55521	3.69614	-0.934349	0.517623	0.354515	-0.293735	-0.077159	0.081305	-0.003054	0.060652	0.080313	-0.960548	-0.146455	-0.354642	0.931295	-0.456971	-0.274202	-0.666813	-0.069296	-0.435947
13355474	AT1G65390	8.74498	5.47699	3.77545	7.00871	5.20966	3.98438	8.0561	5.15752	4.85219	7.61684	3.70237	2.98131	7.61198	5.28917	4.54967	5.68961	4.90783	4.73225	7.27603	5.21593	4.91654	6.97351	4.40649	4.88845	-1.133	-0.187822	0.774215	-1.3191	-0.301832	0.74787	-0.688873	-0.319471	1.07674	0.608131	-1.50729	-1.00307	-0.335944	-0.073232	0.366877	1.28391	-0.501341	0.156201	0.352929	0.246239	-0.709861	0.675776	1.00595	1.15927
13355496	AT1G65450	4.37677	4.09881	4.12364	4.17108	3.87375	4.25828	3.5017	4.24846	3.87296	4.09297	4.71662	4.63028	3.387	3.5145	3.41657	3.76922	3.8345	4.57297	3.73008	3.69176	3.63171	3.30386	3.6159	4.35548	-0.989768	-0.584307	-0.70707	-0.401864	-0.039243	0.314697	-0.87507	0.149649	-0.250682	-0.078115	0.84287	0.372001	0.343077	0.177254	0.215138	-0.465356	-0.218607	-0.217492	1.21815	0.027605	0.46582	-0.387241	-1.06148	-0.589493
13355586	AT1G65760	3.5162	4.35414	4.36092	3.49408	3.49391	4.98435	4.47827	5.13551	4.26706	3.8966	3.84512	3.76133	3.5656	3.71754	3.81611	3.49916	3.24078	3.703	3.58464	3.49016	3.59736	3.52969	3.72718	3.84382	0.049396	-0.636599	-0.544811	0.005085	-0.253132	-1.28135	0.962071	0.781368	-0.09386	0.402527	0.35121	-1.22301	0.019045	-0.227383	-0.218749	0.030527	0.486404	0.140817	-0.943026	-1.00875	-0.124889	-0.372	0.135194	1.36383
13355636	AT1G65870	5.06498	5.38087	5.73185	5.71884	6.25944	6.19187	5.7371	5.55403	5.39536	5.90946	6.77353	6.23446	6.24167	5.75482	6.10015	6.36429	7.3133	7.08311	6.2094	6.12244	5.65817	6.5776	6.84368	6.8875	1.17668	0.373949	0.368298	0.645447	1.05387	0.891242	0.672121	0.173158	-0.336488	0.190616	0.514096	0.042592	-0.032263	0.367622	-0.441973	0.213311	-0.469624	-0.195615	-0.704384	0.194464	-0.105485	0.022695	-0.98372	-0.238207
13355780	AT1G66390	5.11079	5.55107	5.11595	5.82247	5.82387	7.22823	6.13744	5.32001	5.26997	5.77879	6.136	9.30909	5.36409	5.13684	5.5209	5.34664	5.4189	5.59562	5.01854	5.00871	5.70152	4.75528	6.08401	5.79593	0.253303	-0.414233	0.404956	-0.475832	-0.404968	-1.63261	1.02665	-0.231062	0.15402	-0.043673	0.312131	2.08086	-0.345555	-0.128129	0.180614	-0.591351	0.665115	0.200311	-1.3722	0.102933	0.026594	-0.547678	0.352984	-1.88055
13355853	AT1G66590	4.12907	4.63587	4.9881	4.89291	5.07727	4.33062	4.78166	4.48085	4.85057	5.07854	5.08164	5.48627	4.67627	4.58953	4.52254	4.62413	5.40638	4.59145	5.1138	4.89394	4.60636	4.82021	4.63576	4.97349	0.547204	-0.046341	-0.465563	-0.268781	0.329111	0.260831	0.652587	-0.155015	-0.137532	0.185633	0.004369	1.15565	0.437526	0.304411	0.083823	0.196078	-0.770613	0.382038	-0.215061	0.459426	0.221355	0.010445	-0.774982	-0.773614
13356058	AT1G67180	6.83834	6.22998	6.32087	7.02844	6.63301	7.13001	6.14279	6.5097	5.90731	6.56468	6.70772	7.2249	6.60562	6.55768	6.51479	7.51263	7.37208	7.55886	6.33454	5.83931	6.3007	7.01889	6.96231	6.97978	-0.232727	0.327702	0.193925	0.484186	0.739065	0.428846	-0.695554	0.279724	-0.413555	-0.463763	0.074709	0.094885	-0.27108	-0.718372	-0.214087	-0.493742	-0.409767	-0.579074	0.424474	-0.998096	0.199468	-0.029979	-0.484476	-0.673959
13356084	AT1G67220	3.75753	3.95159	3.64805	3.93012	3.54109	3.89442	3.0279	3.9319	3.12066	3.53566	3.52429	3.355	3.63867	3.69866	3.40675	3.62889	3.56961	3.7291	4.07536	3.44978	3.5112	3.52279	4.0242	3.75809	-0.118862	-0.252937	-0.241308	-0.301229	0.028518	-0.165318	-0.729633	-0.019691	-0.527397	-0.394465	-0.016798	-0.539418	0.436687	-0.24888	0.10445	-0.106098	0.454591	0.028989	1.16632	-0.229189	0.631847	0.288367	0.471389	0.568407
13356152	AT1G67455	3.40656	2.83268	2.83081	3.9174	2.69743	3.41625	2.78064	3.70696	3.20716	3.0452	3.65732	3.54732	3.22695	2.27724	2.77785	3.26791	3.36396	2.7254	3.50292	2.83963	4.01403	2.76379	2.67586	2.91914	-0.179611	-0.555435	-0.052961	-0.649487	0.666534	-0.690843	-0.625919	0.874281	0.376342	-0.872194	0.95989	0.13107	0.275977	0.562387	1.23618	-0.50412	-0.688098	0.193733	0.901896	-0.311894	0.859836	0.368074	-1.64799	0.062663
13356456	AT1G68050	4.50677	7.64409	8.05997	4.79171	3.52586	3.41878	5.19278	7.57799	8.0356	4.72392	3.55348	3.60499	4.66908	7.88206	8.35112	5.17087	3.59454	3.95213	4.2705	8.06801	8.06682	5.20851	4.029	3.725	0.16231	0.237977	0.29116	0.379161	0.068681	0.533355	0.686017	-0.066099	-0.02437	-0.067791	0.027623	0.186217	-0.398575	0.185944	-0.284303	0.037638	0.434457	-0.227127	-1.08459	0.252043	-0.259933	0.105429	0.406834	-0.413344
13356924	AT1G69320	3.68761	3.85968	3.82033	3.72131	3.99154	3.80812	4.4196	3.93243	3.77447	3.36543	3.46311	3.77203	4.17649	3.90402	4.33529	4.08663	4.10532	3.95202	3.84463	3.83658	3.83755	4.34884	3.69673	3.51611	0.488879	0.044332	0.514957	0.365321	0.113779	0.1439	0.731994	0.07275	-0.045857	-0.355877	-0.528422	-0.036086	-0.331861	-0.067436	-0.497738	0.262212	-0.408589	-0.435912	-1.06385	-0.140186	-0.451881	0.618089	0.119833	-0.399826
13357176	AT1G69790	4.8422	4.90961	4.17092	4.79769	5.58672	6.05473	4.13289	4.62665	4.87653	5.18594	6.20445	7.15231	5.0433	5.13084	5.55553	5.35592	6.06263	6.94754	5.41067	5.48011	5.52552	5.80308	6.55778	7.82214	0.201103	0.221225	1.38462	0.558231	0.475911	0.892815	-0.709313	-0.282966	0.705619	0.388253	0.617732	1.09758	0.367369	0.349268	-0.030011	0.447162	0.495146	0.874599	1.07668	0.632234	-0.73563	0.058909	-0.122586	-0.222979
13357218	AT1G70020	5.02463	4.84031	5.30395	4.20704	4.55681	4.38769	4.13859	4.38708	4.78905	4.26324	4.77395	4.45464	3.45524	3.74907	3.63991	3.36352	3.33752	3.422	3.17434	3.52403	3.36352	3.69562	3.06093	3.24286	-1.5694	-1.09124	-1.66404	-0.843525	-1.21929	-0.965695	-0.886043	-0.453227	-0.5149	0.056199	0.217146	0.066943	-0.280899	-0.22504	-0.276391	0.3321	-0.276589	-0.179144	0.605144	0.228187	0.238509	0.275901	-0.493735	-0.246087
13357274	AT1G70120	2.98383	3.52728	3.16774	3.75684	3.17657	3.29711	4.01595	3.81342	3.18835	3.32873	3.56004	3.46024	3.29717	3.17392	3.36445	4.00186	3.24914	3.84112	3.66479	3.07278	3.41996	3.1009	3.44673	3.19975	0.313336	-0.353352	0.196711	0.245018	0.072567	0.54401	1.03212	0.28614	0.020608	-0.42811	0.38347	0.163124	0.367629	-0.101146	0.055506	-0.900954	0.197591	-0.641375	-0.66449	-0.387286	0.034898	-0.472844	-0.185879	-0.804499
13357373	AT1G70450	4.25035	3.33723	4.16682	3.84541	3.75042	4.68626	3.55756	3.99541	3.68831	3.98059	3.91759	4.85121	3.57323	4.42675	4.24708	3.9826	3.60829	3.90887	3.66246	3.52048	3.81926	3.75303	4.4655	3.25085	-0.677124	1.08952	0.080265	0.137191	-0.142127	-0.777392	-0.692796	0.658186	-0.478505	0.135176	0.167171	0.164947	0.089236	-0.906266	-0.427821	-0.229578	0.857206	-0.658014	0.782032	-1.56445	0.050684	-0.364754	0.690035	-0.822961
13357605	AT1G70800	6.25871	6.34467	6.95772	6.02644	6.3437	6.68666	5.61943	6.71802	6.77176	5.95289	6.13812	6.22463	5.87432	6.13237	5.74503	5.84297	5.36992	6.14613	6.00767	6.07496	6.44826	5.52766	5.85024	5.98649	-0.384391	-0.212298	-1.2127	-0.183473	-0.973787	-0.540535	-0.639278	0.373351	-0.185963	-0.073546	-0.205579	-0.462033	0.133354	-0.057412	0.703232	-0.315309	0.480321	-0.159642	0.772632	-0.430763	0.889195	-0.241763	0.6859	0.302391
13357645	AT1G70910	3.2305	3.30029	3.56694	3.51406	3.43149	2.96326	3.96328	3.38536	3.20938	2.87769	3.38102	2.86613	3.72703	3.1561	3.69573	3.77825	3.33503	3.45217	3.70165	3.378	3.4929	3.47358	3.18085	3.32262	0.496524	-0.14419	0.128791	0.264184	-0.09646	0.488905	0.732774	0.085069	-0.357563	-0.636377	-0.050468	-0.097134	-0.02538	0.221909	-0.202825	-0.304666	-0.154184	-0.129543	-0.758154	0.13684	0.154738	0.331711	-0.103716	-0.032409
13357830	AT1G71300	3.03325	2.91119	2.98822	3.33342	3.26169	3.48708	3.82716	3.35426	3.43264	3.4218	3.34767	3.34625	3.45115	3.34625	3.16529	3.79405	3.50835	3.2464	3.49261	3.41867	3.34625	3.19976	3.41861	3.5867	0.417894	0.435058	0.177077	0.460629	0.246661	-0.240676	0.793904	0.443069	0.444428	0.088386	0.085977	-0.140829	0.041469	0.072423	0.180953	-0.594284	-0.089743	0.3403	-0.752435	-0.370646	-0.263475	-0.68267	-0.17572	0.481129
13357852	AT1G71400	5.09752	4.24614	4.46632	4.98754	4.21267	3.39135	4.05086	5.03892	4.74378	5.10274	4.11195	3.99336	6.3297	5.77235	5.47004	5.78339	5.64142	4.96133	6.6618	6.40693	5.88465	5.92832	5.74352	5.53382	1.23218	1.52621	1.00372	0.79586	1.42875	1.56998	-1.04667	0.792786	0.277461	0.115209	-0.100717	0.60201	0.332101	0.634579	0.414612	0.144922	0.102095	0.572492	1.37877	-0.158207	0.137151	0.029713	0.202812	-0.029518
13357856	AT1G71430	7.57634	6.95512	7.00861	6.83911	7.10953	7.02935	6.92985	6.70674	6.90735	6.73064	7.00383	7.10361	6.47031	6.49994	6.21139	6.35888	6.32946	6.83173	6.52039	6.73235	6.53854	6.30578	6.34156	6.51931	-1.10604	-0.455185	-0.797216	-0.48023	-0.780075	-0.197617	-0.646496	-0.248385	-0.101264	-0.108474	-0.105696	0.074267	0.050084	0.23241	0.327143	-0.053101	0.012102	-0.31242	0.69658	0.480795	0.428407	0.055373	0.117798	-0.386687
13358304	AT1G72360	5.28355	3.99596	3.41557	4.25704	3.98548	3.45181	4.71092	3.84802	3.84763	4.51342	3.53506	3.28174	4.81375	3.56226	3.85019	4.09603	4.15973	3.76639	4.64138	4.10372	3.66617	4.27648	3.6087	3.44528	-0.469794	-0.433701	0.434618	-0.161016	0.17425	0.314578	-0.572625	-0.147932	0.432053	0.256379	-0.450417	-0.170072	-0.172374	0.54146	-0.184026	0.180454	-0.551027	-0.321114	0.400251	0.689392	-0.616079	-0.075925	-0.10061	-0.151042
13358353	AT1G72570	2.99612	3.3391	3.33769	3.55879	3.74358	3.37707	3.76636	3.94293	3.06185	3.35257	3.29359	3.81026	3.86287	3.38407	3.23878	3.31237	3.35632	3.27332	3.51639	3.22128	3.0966	3.53725	3.54866	3.32021	0.866745	0.044977	-0.098913	-0.246425	-0.387258	-0.103746	0.770239	0.603838	-0.275845	-0.206217	-0.449989	0.433195	-0.346471	-0.162797	-0.142178	0.224887	0.192339	0.046882	-1.11671	-0.766635	0.133667	0.431104	0.642328	-0.386313
13359221	AT1G74720	6.6426	6.25837	6.61723	6.29374	6.84868	6.55737	6.03544	6.21774	6.34416	6.17335	6.44775	6.44844	6.42295	6.36422	6.34443	6.44844	6.65238	6.64635	6.18554	6.54717	6.47445	6.36749	6.44025	6.44844	-0.219652	0.105857	-0.272799	0.154694	-0.196305	0.088977	-0.60716	-0.040624	-0.273069	-0.120399	-0.400933	-0.108934	-0.237409	0.182944	0.130027	-0.080948	-0.212126	-0.197911	0.369751	0.223568	0.403096	0.039451	0.188807	-0.088977
13359247	AT1G74810	6.44789	5.82115	4.49725	6.2101	6.5566	6.61995	5.77994	5.83789	4.88321	6.2101	7.26975	7.52065	5.20659	4.39875	5.07557	4.92625	4.60059	4.99199	5.11538	4.76086	4.3801	4.61634	4.89186	5.34066	-1.24129	-1.4224	0.578317	-1.28385	-1.95601	-1.62795	-0.667942	0.016741	0.385951	0	0.713143	0.900703	-0.091208	0.36211	-0.695474	-0.309914	0.29127	0.348669	0.576734	0.345369	-1.08143	-0.309914	-0.421873	-0.552034
13359728	AT1G76190	4.00752	4.59657	4.16953	4.44764	4.6152	4.25103	4.75069	4.4009	4.0101	4.4512	4.20662	4.05724	4.81466	4.38257	4.27673	4.69234	4.33531	4.47199	4.29448	4.70671	4.32104	4.32913	4.36912	3.98106	0.807139	-0.213999	0.107202	0.244704	-0.279886	0.220962	0.743168	-0.195666	-0.159433	0.003569	-0.408579	-0.193785	-0.520183	0.324139	0.044307	-0.36321	0.033813	-0.490929	-1.26335	0.519805	0.20374	-0.366779	0.442392	-0.297144
13359830	AT1G76530	3.49203	4.17676	4.60818	4.45611	5.62777	6.33323	2.76644	3.72536	4.22941	4.7589	5.17801	6.30192	3.74072	3.65026	4.87365	5.47367	6.10795	5.8406	4.13875	3.70284	5.26882	5.47304	5.62566	5.64131	0.248692	-0.526502	0.265466	1.01756	0.480178	-0.492631	-0.725592	-0.451396	-0.378774	0.302791	-0.449758	-0.031317	0.39803	0.052583	0.395166	-0.000624	-0.482284	-0.199294	1.12362	0.503979	0.77394	-0.303415	-0.032526	-0.167977
13360638	AT1G78410	6.25711	4.8518	5.26618	5.86033	4.61272	4.32867	6.86149	5.86114	6.01408	6.9553	5.20301	5.64288	7.16832	6.60872	6.64881	6.85365	5.96189	6.07968	7.50831	7.15492	6.83356	7.35678	6.27885	6.90397	0.911213	1.75692	1.38262	0.993322	1.34917	1.75101	0.604378	1.00933	0.747901	1.09497	0.59029	1.3142	0.33999	0.546202	0.184755	0.503124	0.31696	0.824288	-0.264388	-0.46313	-0.563146	-0.59185	-0.27333	-0.489913
13360791	AT1G78710	3.33815	3.76423	3.33675	3.76035	3.39049	3.77235	4.19329	3.6496	3.30927	3.55282	3.17992	3.97002	3.59772	4.33834	3.78135	4.1165	3.66137	4.08814	3.76788	3.88108	4.05028	3.79664	3.68029	4.4788	0.259572	0.574103	0.444605	0.356149	0.270874	0.315783	0.855145	-0.114637	-0.027476	-0.207533	-0.210574	0.197669	0.17016	-0.457254	0.268927	-0.319858	0.018922	0.390667	-0.684985	-0.342617	0.296403	-0.112325	0.229496	0.192998
13360946	AT1G79100	2.92605	2.58857	2.50881	3.19311	2.63092	2.83131	2.31738	2.6621	2.35586	2.55717	3.0272	2.93795	2.92605	2.68586	3.64197	2.94035	3.12032	3.2662	2.62585	2.62724	2.92605	3.07891	3.26107	3.2194	0	0.097292	1.13317	-0.252764	0.489402	0.434887	-0.608665	0.073534	-0.152945	-0.635944	0.396283	0.10664	-0.300199	-0.058628	-0.715927	0.138562	0.140753	-0.046792	0.308466	-0.132162	-0.562982	0.774506	-0.25553	-0.153432
13360960	AT1G79170	6.7886	6.99125	6.18067	7.36819	7.57223	7.46852	5.74828	6.26264	6.37177	7.14957	6.47735	6.39959	7.98612	7.87368	7.08147	8.24941	7.49423	7.67889	7.68816	7.63139	7.02148	7.59564	8.17768	7.33563	1.19752	0.882427	0.900801	0.881215	-0.077998	0.210361	-1.04032	-0.72862	0.191106	-0.218622	-1.09489	-1.06893	-0.297964	-0.24229	-0.059989	-0.653769	0.683447	-0.343254	0.742353	0.48633	-0.251095	-0.435147	1.77833	0.725679
13361214	AT1G79800	3.74069	4.1478	4.22784	4.58831	4.23335	4.51766	4.38239	4.60597	4.27077	4.29525	4.23631	3.84187	4.78871	4.47583	4.83134	4.83754	4.38239	4.33822	4.88293	4.10547	4.3003	4.50574	4.64315	4.31834	1.04802	0.328033	0.603498	0.249228	0.149041	-0.179444	0.641701	0.458176	0.04293	-0.293067	0.002961	-0.675789	0.094214	-0.370366	-0.531036	-0.331805	0.260755	-0.019876	-0.547487	-0.828542	-0.573966	-0.038738	0.257794	0.655913
13361268	AT1G79915	5.07456	4.26273	4.35459	3.86259	3.63997	3.76207	4.42726	4.62551	4.14921	4.25015	4.0439	3.93213	4.08386	4.46617	3.67244	3.5559	2.94606	3.82824	4.34886	3.85637	3.90689	3.69455	4.14573	3.2892	-0.990699	0.20344	-0.68215	-0.306685	-0.69391	0.066171	-0.647303	0.36278	-0.205382	0.387565	0.403928	0.170055	0.264997	-0.609805	0.234453	0.138649	1.19967	-0.539042	0.9123	-0.972585	0.439835	-0.248916	0.795746	-0.709097
13361838	AT1G01070	4.38883	3.90961	3.66337	3.94757	4.48554	4.51271	3.76213	3.96224	3.71026	3.52519	4.35332	4.2053	4.36099	4.71374	4.06242	4.47703	4.93347	4.79592	4.65678	5.10492	4.24485	4.11884	4.99854	4.3999	-0.027843	0.804124	0.399047	0.529458	0.447926	0.283216	-0.626703	0.052629	0.046888	-0.422377	-0.132224	-0.307408	0.295787	0.391178	0.18243	-0.358185	0.065074	-0.396023	0.92249	0.338549	0.135542	0.064192	0.197298	-0.088615
13362349	AT1G02405	5.82524	4.86227	4.76183	4.77434	5.10851	4.76409	5.16697	4.97776	4.78368	4.9081	5.06384	5.55745	5.18417	4.80905	4.80905	4.47575	4.8616	5.00844	5.25442	4.83536	4.76653	4.938	4.85273	5.29236	-0.641073	-0.053212	0.047228	-0.298595	-0.246909	0.244352	-0.658264	0.115492	0.02185	0.133754	-0.044673	0.793361	0.070255	0.026305	-0.042526	0.462257	-0.008874	0.283921	0.728519	-0.089187	-0.064376	0.328503	0.035799	-0.50944
13362367	AT1G02460	6.0998	5.16451	5.10855	5.48852	4.78031	5.89429	5.51576	5.55287	5.11296	5.46052	6.13134	6.76292	5.46217	4.97533	4.40693	5.03117	5.06882	5.90937	5.76195	4.99515	4.89376	6.08948	5.90502	6.47442	-0.637627	-0.189177	-0.701627	-0.457347	0.288509	0.015082	-0.584037	0.388365	0.004407	-0.027999	1.35103	0.868637	0.299774	0.019824	0.486835	1.05831	0.836201	0.565053	0.883811	-0.368541	0.482428	1.0863	-0.51483	-0.303584
13362633	AT1G03055	5.89582	6.69587	6.98916	6.6692	8.34877	8.46588	6.62506	6.52037	7.13823	6.38094	8.2521	7.93226	6.6963	7.30826	6.90909	6.78372	8.15435	8.33032	6.82777	6.98406	6.96127	6.50556	8.03661	8.3006	0.80048	0.612386	-0.080068	0.114522	-0.194414	-0.135557	0.72924	-0.175503	0.149069	-0.28826	-0.096672	-0.53362	0.131474	-0.324193	0.052177	-0.278163	-0.117743	-0.029726	-0.597766	-0.14869	-0.096892	0.010097	-0.021071	0.503894
13362671	AT1G03100	6.96799	7.13523	6.93299	6.44742	6.08908	6.22474	6.26193	6.99564	6.71585	6.43462	6.05129	5.90523	6.40553	7.04206	6.45829	6.29065	5.98975	6.08312	6.28826	6.32075	6.08828	6.43447	5.99406	5.60109	-0.562466	-0.093168	-0.474691	-0.156773	-0.099327	-0.141616	-0.706061	-0.13959	-0.217137	-0.012799	-0.037789	-0.319505	-0.117267	-0.721313	-0.370018	0.143818	0.004311	-0.482033	0.588794	-0.581723	-0.152881	0.156617	0.0421	-0.162528
13362764	AT1G03457	7.58227	6.98923	7.16099	7.32606	7.31303	6.41148	6.9944	6.60549	6.71999	7.53914	6.91941	5.84454	7.56072	7.49162	7.09839	7.36362	7.46892	7.03786	7.13718	7.12913	7.45829	7.73915	7.39581	6.90541	-0.021547	0.502391	-0.062591	0.037558	0.155891	0.626376	-0.587865	-0.383739	-0.440998	0.213071	-0.393629	-0.566944	-0.423541	-0.362485	0.359899	0.375531	-0.073115	-0.132453	0.164324	0.021254	0.800897	0.16246	0.320514	0.434491
13362796	DQ108835	3.38197	2.29453	3.13751	2.25004	2.64471	2.22977	2.39905	2.5622	2.73653	2.24985	2.3944	1.95105	2.11536	2.3662	2.10947	2.51762	2.35091	2.16934	2.16275	1.98959	2.14483	1.81782	2.12503	1.84065	-1.26662	0.071673	-1.02804	0.267588	-0.293802	-0.060438	-0.982919	0.267666	-0.400986	-0.000182	-0.250311	-0.278723	0.04739	-0.376616	0.035353	-0.6998	-0.225873	-0.328683	1.03031	-0.644282	0.436339	-0.699618	0.024438	-0.04996
13362882	AY707463	5.60727	5.38204	5.46866	4.69189	5.0045	5.5851	4.52572	4.39734	5.73815	4.79575	4.39761	5.59365	4.8308	4.98748	4.66516	4.40481	5.09124	5.38231	4.60586	5.06142	4.06163	4.93554	5.0045	4.94598	-0.776469	-0.394564	-0.803493	-0.287082	0.086737	-0.202787	-1.08155	-0.984698	0.269495	0.103852	-0.606892	0.008548	-0.224937	0.073941	-0.603534	0.530731	-0.086737	-0.436335	0.856617	1.05864	-0.873029	0.426879	0.520155	-0.444883
13363080	AT1G04171	3.38885	2.36459	2.62297	2.7106	3.0828	2.3672	2.56045	2.72897	2.66296	2.25526	2.62485	2.63304	2.97302	3.40388	2.42495	2.61025	3.04007	2.65279	2.63304	2.58212	2.96864	2.65982	2.66572	2.41718	-0.415833	1.0393	-0.19802	-0.10035	-0.042734	0.285588	-0.828401	0.364379	0.039994	-0.455342	-0.457948	0.265842	-0.339981	-0.821759	0.543689	0.049569	-0.374352	-0.235609	0.48842	-1.18614	0.503695	0.504911	0.083596	-0.501451
13363155	AT1G04330	2.99645	3.02898	3.06041	3.64907	3.18506	3.60278	3.71511	4.12307	3.33094	2.85708	2.92323	3.0232	3.2753	3.18506	3.29333	3.12905	3.46317	3.06101	3.29152	2.96318	2.8054	3.14134	3.36049	3.15601	0.278847	0.156083	0.232921	-0.520026	0.278105	-0.541767	0.71866	1.09409	0.270529	-0.791991	-0.26183	-0.579581	0.016219	-0.221876	-0.487927	0.012296	-0.10267	0.094997	-0.702441	-1.31597	-0.758456	0.804287	0.15916	0.674578
13363798	AT1G05440	5.79539	5.49853	6.09603	5.18812	5.727	5.6618	5.10488	5.8824	5.15131	5.45798	5.73223	5.28605	6.2149	5.62882	5.47312	6.42739	5.92774	6.01471	6.17813	6.05267	5.73241	6.69432	6.41751	6.17767	0.419505	0.130287	-0.622912	1.23928	0.20074	0.352906	-0.690512	0.383869	-0.944727	0.269863	0.005231	-0.375753	-0.036767	0.423846	0.259289	0.266923	0.489771	0.162958	0.653745	0.039977	1.20402	-0.00294	0.48454	0.538711
13363905	AT1G05580	2.83143	3.07648	3.05354	3.16175	2.99201	2.99038	3.44388	2.99083	2.93399	2.87698	2.92093	3.04451	3.44222	3.70883	3.1262	3.35152	3.21694	3.04617	3.68274	3.39402	3.85047	3.44019	3.04006	2.97275	0.610795	0.632344	0.072656	0.189769	0.224923	0.055789	0.612454	-0.085654	-0.119545	-0.28477	-0.071086	0.054127	0.240516	-0.314807	0.724278	0.088679	-0.176875	-0.073419	-0.371938	-0.229153	0.843823	0.373449	-0.105789	-0.127546
13364121	AT1G06148	4.14837	4.44348	4.03874	4.32049	4.62509	4.16018	5.19963	4.44348	4.23876	4.84474	4.12562	4.12907	5.04544	4.55061	4.468	4.6216	4.30741	4.4645	4.91531	4.77522	4.70117	4.43377	5.02279	4.37679	0.897071	0.107132	0.429256	0.301108	-0.317682	0.304322	1.05126	0	0.200023	0.524244	-0.499464	-0.031105	-0.130127	0.224606	0.233178	-0.187829	0.715382	-0.087709	-1.18138	0.224606	0.033155	-0.712073	1.21485	-0.056604
13364175	AT1G06340	3.91037	3.64733	4.13796	3.88548	4.0258	4.02351	2.83373	3.69182	3.30931	3.91961	3.17086	4.08029	3.39377	3.44479	3.969	3.59355	3.53294	3.63182	3.68076	3.8008	3.70537	3.44023	4.5802	3.65593	-0.516604	-0.202533	-0.168958	-0.29193	-0.492862	-0.391691	-1.07664	0.044493	-0.828642	0.034136	-0.854946	0.056785	0.286995	0.356004	-0.263627	-0.153323	1.04726	0.024115	1.36363	0.311511	0.565015	-0.187459	1.90221	-0.03267
13364187	AT1G06360	10.0848	10.2517	10.2363	10.9337	10.0921	10.4689	9.20154	9.3995	9.92009	10.5782	9.87591	8.96136	9.95277	10.2633	10.3872	10.873	10.4736	10.7397	9.51524	10.0297	10.2463	10.9804	10.3339	10.5026	-0.132018	0.01156	0.15081	-0.0607	0.38147	0.27072	-0.883248	-0.852227	-0.316246	-0.35554	-0.216234	-1.50759	-0.437535	-0.23359	-0.14083	0.10733	-0.13971	-0.23703	0.445713	0.618637	0.175416	0.46287	0.076524	1.27056
13364205	AT1G06440	4.20196	4.94934	5.23239	5.2341	4.76475	4.75053	4.81379	5.35801	5.39818	5.51334	4.79947	4.70248	4.74245	5.56756	5.38047	5.32832	4.45855	4.82883	4.67474	5.35971	5.49235	5.02951	4.53074	4.55923	0.540487	0.618216	0.148087	0.094221	-0.306199	0.078303	0.611832	0.408666	0.165796	0.279241	0.034718	-0.048047	-0.067705	-0.207849	0.111878	-0.298813	0.072186	-0.269601	-0.679537	-0.616515	-0.053918	-0.578054	0.037468	-0.221554
13364234	AT1G06540	5.66542	6.52315	6.50589	7.19513	6.47555	6.37131	6.55579	6.71419	5.96387	6.46157	6.27694	6.87206	6.68658	6.94786	7.01618	7.0449	6.50546	6.197	7.11845	6.78122	6.56825	6.55739	6.80718	6.5925	1.02116	0.424715	0.510289	-0.150227	0.029912	-0.174308	0.890369	0.191045	-0.542022	-0.733562	-0.19861	0.500751	0.431874	-0.166641	-0.447936	-0.487509	0.301718	0.395496	-0.458495	-0.357686	0.094086	0.246053	0.500328	-0.105255
13364484	AT1G07025	3.73168	3.56925	4.40294	4.45948	4.1109	3.67945	4.42852	4.04753	3.70325	3.94655	3.70699	3.995	4.44364	4.19569	4.49112	4.06917	4.30169	4.75824	4.4757	4.78326	3.7424	3.99525	3.83522	4.63943	0.71196	0.626435	0.088177	-0.390308	0.190786	1.07879	0.696835	0.478282	-0.699695	-0.512926	-0.403913	0.315547	0.03206	0.587569	-0.748715	-0.073924	-0.466471	-0.118815	-0.664775	0.109287	-0.04902	0.439002	-0.062558	-0.434362
13364566	AT1G07160	4.40534	3.41651	3.05507	3.49486	2.95206	3.22642	4.99693	3.45362	3.45562	3.39212	3.21805	3.49486	4.92899	3.82503	2.95325	3.88379	3.10682	3.40591	4.87651	3.96377	4.09022	3.41592	3.04368	3.48547	0.523649	0.408516	-0.101823	0.388929	0.154759	0.179484	0.591584	0.037111	0.400549	-0.102738	0.265988	0.268434	-0.05248	0.138742	1.13698	-0.467869	-0.063136	0.07956	-0.644064	0.101631	0.736426	-0.365131	-0.329124	-0.188874
13364699	AT1G07490	6.45516	7.21666	8.18021	8.83773	8.23487	7.37745	7.16495	6.77387	7.47787	8.51901	7.90257	5.62645	6.64987	7.47382	8.0116	8.86444	8.30065	7.51951	6.73132	6.95512	7.94669	8.43013	7.80057	6.72307	0.194705	0.257152	-0.16861	0.026716	0.065778	0.14206	0.709788	-0.442796	-0.702338	-0.318714	-0.332298	-1.751	0.081453	-0.518695	-0.064903	-0.434318	-0.500082	-0.796445	-0.628335	-0.075899	0.637435	-0.115604	-0.167784	0.95456
13365017	AT1G08080	4.40289	4.59351	5.70215	5.58729	5.45957	5.06201	5.2577	5.03843	4.90016	4.46853	4.65506	4.49053	4.85158	5.29069	5.23732	5.28966	5.24178	4.87536	5.33958	4.61902	5.16957	5.12214	4.72922	4.75698	0.448689	0.697174	-0.464831	-0.29763	-0.217787	-0.186645	0.854804	0.44492	-0.801993	-1.11877	-0.804513	-0.57148	0.487998	-0.671672	-0.067757	-0.167519	-0.512567	-0.11838	-0.366806	-1.11659	0.734236	0.951246	0.291946	0.4531
13365420	AT1G09030	3.00026	3.46023	3.66488	4.37074	3.77306	3.56048	3.71078	3.67448	3.45904	3.64414	3.23516	3.306	3.98652	3.74277	4.26939	3.85893	3.40899	3.79543	3.5301	3.47227	3.87737	3.79207	3.7667	3.61687	0.986262	0.282541	0.604507	-0.511813	-0.364072	0.234944	0.710519	0.214255	-0.205842	-0.726596	-0.537901	-0.254482	-0.456422	-0.270496	-0.39202	-0.066852	0.357719	-0.178562	-1.16694	-0.484751	-0.186178	0.659744	0.89562	0.07592
13365497	AT1G09157	5.08673	5.74543	4.96975	5.30944	4.83348	5.87999	5.70675	5.55984	5.40514	5.10139	4.93316	4.7541	5.01023	5.00892	5.08672	4.66745	5.00998	5.14883	5.38092	5.46671	5.36744	5.22106	5.43453	5.71806	-0.076495	-0.736511	0.116972	-0.641994	0.176501	-0.731165	0.620026	-0.185587	0.43539	-0.208055	0.099672	-1.1259	0.370692	0.45779	0.280721	0.553613	0.424545	0.569236	-0.249334	0.643377	-0.154669	0.761668	0.324873	1.69513
13365753	AT1G09720	4.31485	5.67858	5.23404	4.75177	4.60877	5.2191	4.93512	5.60116	4.46104	5.16174	4.55298	4.36809	5.53146	5.00066	5.25622	4.58909	4.74736	5.19745	5.20346	5.0538	4.95859	4.92171	4.79334	4.90467	1.21661	-0.677913	0.022178	-0.162683	0.138583	-0.02165	0.620268	-0.077413	-0.773002	0.409971	-0.055789	-0.851006	-0.328006	0.053133	-0.297628	0.332625	0.045983	-0.29278	-0.948274	0.130546	0.475374	-0.077346	0.101772	0.558226
13365861	AT1G09880	5.07435	5.24001	5.08878	5.33042	5.75308	5.11934	4.3493	5.3627	4.86163	4.60336	4.92605	5.25708	5.88916	5.10949	5.31379	5.70522	5.6244	5.68104	5.2884	5.30839	5.48234	5.43598	5.25341	5.17306	0.814813	-0.130519	0.22501	0.374794	-0.128677	0.561696	-0.725044	0.122691	-0.227156	-0.727062	-0.827026	0.137735	-0.600758	0.198903	0.168548	-0.269242	-0.370989	-0.507979	0.124286	0.076212	0.395704	0.45782	0.456037	-0.645714
13366022	AT1G10100	6.5483	6.93786	6.07716	6.57075	6.02932	6.61332	5.87557	6.57969	5.91936	6.06726	6.36875	7.13894	6.13157	6.26891	6.32833	6.32923	5.96278	6.01563	6.12597	5.9666	5.84629	6.03343	6.15684	6.36822	-0.416726	-0.668943	0.251172	-0.241521	-0.066543	-0.597684	-0.67273	-0.358166	-0.157806	-0.503496	0.33943	0.525627	-0.005601	-0.30231	-0.482046	-0.295799	0.194057	0.352584	0.667129	0.055856	-0.32424	0.207697	-0.145373	-0.173043
13366251	AT1G10620	3.42081	5.01362	4.38886	4.11227	4.0452	4.59242	4.02902	4.28221	4.18602	4.49804	4.23735	4.0013	4.64834	4.65499	4.85202	4.61895	4.12337	4.22538	4.54769	4.26073	4.22065	4.35605	4.63228	4.60716	1.22754	-0.358629	0.463161	0.50668	0.078171	-0.367041	0.608216	-0.731418	-0.202843	0.385773	0.192158	-0.591123	-0.100655	-0.394264	-0.631368	-0.2629	0.508913	0.381779	-0.708871	0.337154	-0.428525	-0.648673	0.316755	0.972902
13366267	AT1G10640	4.83412	6.45581	7.89426	7.43899	8.3107	8.08598	5.63005	5.83619	7.28103	7.13363	7.79486	5.75304	5.79964	6.69895	8.39408	8.51008	8.57588	8.42638	5.26844	6.29506	7.9893	7.99602	8.27487	7.64587	0.965517	0.243136	0.49982	1.07109	0.265181	0.3404	0.795927	-0.619625	-0.613232	-0.305357	-0.51584	-2.33294	-0.531196	-0.403884	-0.404788	-0.514064	-0.301012	-0.780508	-1.32712	0.215741	0.208444	-0.208707	0.214828	1.55243
13366362	AT1G10770	3.53618	4.606	3.66974	3.20037	3.0156	3.20219	4.67933	4.09803	3.33532	3.38216	3.34691	3.06106	3.6773	3.59479	3.37061	3.22493	3.17732	3.17925	3.54418	3.24743	3.20614	3.12297	3.37634	3.08494	0.141122	-1.01121	-0.299124	0.024558	0.161715	-0.022943	1.14314	-0.507977	-0.33442	0.181784	0.33131	-0.141128	-0.133128	-0.347368	-0.164473	-0.101957	0.199025	-0.094304	-1.27627	0.160609	0.169947	-0.283741	-0.132285	0.046824
13366573	AT1G11100	5.43918	5.50195	5.57378	4.67468	5.21211	4.68642	6.06404	5.45927	5.37391	4.25281	5.07098	4.63533	6.01274	5.13168	5.46959	4.22115	4.8571	4.52246	6.5739	5.9729	5.42325	4.79984	4.57273	5.1791	0.57356	-0.370275	-0.104189	-0.453531	-0.35501	-0.163967	0.624863	-0.042683	-0.199869	-0.421877	-0.141129	-0.051094	0.561163	0.841224	-0.046341	0.578692	-0.284373	0.656642	-0.0637	0.883907	0.153528	1.00057	-0.143244	0.707736
13366947	AT1G12030	5.63154	6.31431	6.28794	5.39201	5.99832	5.6276	6.22215	5.93365	6.07215	4.65519	5.72211	5.70461	7.13325	6.31759	6.35394	6.08917	6.22218	6.16592	7.5733	6.15736	6.7376	6.0611	6.73143	6.83973	1.50172	0.003289	0.066003	0.69715	0.223861	0.53832	0.590611	-0.380652	-0.215789	-0.736829	-0.276204	0.077003	0.440047	-0.160234	0.383654	-0.028065	0.509253	0.673804	-0.150564	0.220418	0.599443	0.708764	0.785457	0.596801
13367095	AT1G12570	4.13913	3.66145	3.45874	3.91559	3.93939	4.32268	3.04627	4.02419	3.58869	3.73202	4.34427	3.91181	3.44822	3.83163	3.64226	3.64511	3.7622	4.38068	3.32452	3.73202	3.77945	3.62741	3.51518	4.34839	-0.69091	0.170176	0.183524	-0.270477	-0.177194	0.058001	-1.09287	0.362735	0.12995	-0.183573	0.404877	-0.410872	-0.123697	-0.099612	0.137193	-0.017704	-0.247022	-0.032292	0.969169	-0.462347	0.007243	0.165869	-0.651899	0.37858
13367114	AT1G12610	2.45043	2.45859	2.70234	2.54697	2.51197	2.4186	3.30099	2.5076	2.71687	2.8324	2.51423	2.53005	2.98127	2.95742	2.93874	2.7574	2.61749	2.56359	3.02833	2.91107	2.85584	2.73865	2.64467	2.63707	0.530832	0.498826	0.2364	0.210426	0.105523	0.14499	0.850558	0.049011	0.014525	0.285424	0.002261	0.111453	0.047068	-0.046345	-0.082901	-0.01875	0.027182	0.073484	-0.80349	-0.095356	-0.097426	-0.304174	0.024921	-0.037969
13367147	AT1G12710	5.60024	6.39917	6.17594	5.85523	5.15688	5.28958	6.24235	6.52214	5.79708	5.87334	5.04399	5.0564	5.6512	6.04715	6.08256	5.65503	4.7628	5.01811	5.6525	6.58219	6.05376	5.73699	4.37322	5.09945	0.05096	-0.352019	-0.093379	-0.200197	-0.394075	-0.271473	0.642104	0.122963	-0.378858	0.018104	-0.112892	-0.233174	0.001301	0.535034	-0.028803	0.081951	-0.389582	0.081348	-0.640803	0.412071	0.350055	0.063847	-0.27669	0.314522
13367381	AT1G06480	3.33524	3.09723	4.32096	3.89791	4.90126	3.46694	4.02129	4.16561	3.15078	3.36823	3.33156	4.65867	3.67562	3.82429	4.21585	4.00814	4.28237	3.84665	4.20483	3.32793	3.56066	3.63762	4.17625	4.41249	0.340381	0.727059	-0.105113	0.110233	-0.618888	0.37971	0.686055	1.06838	-1.17018	-0.529685	-1.5697	1.19173	0.529213	-0.496368	-0.655184	-0.370523	-0.106123	0.565836	-0.156842	-1.56475	0.514992	0.159162	1.46358	-0.625899
13367500	AT1G13485	3.72386	3.75718	3.64177	3.16184	3.54781	4.38955	2.98517	3.54992	3.30934	3.47737	3.68876	4.4405	3.49411	3.55848	3.30551	3.14481	3.6826	3.36766	2.95485	2.95682	2.73415	2.95322	3.78793	3.17005	-0.229748	-0.198706	-0.336258	-0.017027	0.13479	-1.02189	-0.738682	-0.207264	-0.332425	0.315524	0.140949	0.050951	-0.539261	-0.601659	-0.571357	-0.1916	0.105328	-0.197606	0.199421	-0.394395	-0.238932	-0.507124	-0.035621	-0.248557
13367506	AT1G13500	5.81931	6.52871	6.48443	5.92598	5.66033	5.96636	5.21463	6.52294	5.14148	5.94856	5.73364	6.83318	5.97311	5.46999	5.08282	5.49944	5.44274	6.20954	5.55883	5.45684	4.33853	5.24097	5.78587	5.34693	0.153801	-1.05872	-1.4016	-0.426548	-0.217591	0.243178	-0.604682	-0.005775	-1.34295	0.022581	0.073307	0.866823	-0.414283	-0.01315	-0.744294	-0.258464	0.34313	-0.862605	0.190399	-0.007375	0.598658	-0.281045	0.269823	-1.72943
13367605	AT1G13710	5.72388	5.60845	5.57967	5.04346	4.72401	4.99589	6.78559	5.67423	5.89043	4.54573	4.65307	4.40011	6.23821	6.21263	6.72469	5.90297	6.19135	6.13852	6.42967	6.55213	6.42748	5.70252	6.66376	6.66286	0.514326	0.604176	1.14502	0.859506	1.46734	1.14263	1.06171	0.065778	0.310762	-0.497729	-0.070942	-0.595783	0.191461	0.339501	-0.297216	-0.200447	0.472412	0.524338	-0.870252	0.273723	-0.607978	0.297282	0.543354	1.12012
13367697	AT1G14048	5.52528	4.67337	5.44279	4.35207	4.85892	6.06243	4.39763	6.51819	3.98909	4.98039	4.24371	6.32214	4.66323	4.8625	5.27768	4.5236	4.49448	4.45591	4.5323	3.32994	4.4361	4.21186	4.2085	4.15078	-0.862051	0.189133	-0.165113	0.171529	-0.364436	-1.60652	-1.12765	1.84482	-1.4537	0.628318	-0.615211	0.259704	-0.13093	-1.53256	-0.84158	-0.311738	-0.285986	-0.305133	0.996721	-3.37739	0.612116	-0.940056	0.329225	-0.564837
13367856	AT1G14455	4.14665	3.05404	3.10017	3.65978	3.41106	3.38612	2.76581	3.15814	2.9701	3.09523	3.2138	3.68899	3.28054	3.73509	3.23734	3.0231	3.86129	3.40906	3.12177	3.18958	3.1713	3.31663	3.53184	3.56245	-0.866107	0.681046	0.137168	-0.636676	0.450235	0.022946	-1.38084	0.104093	-0.130073	-0.564543	-0.197261	0.302873	-0.158768	-0.54551	-0.066044	0.293533	-0.329455	0.153384	1.22208	-0.649603	0.064029	0.858076	-0.132194	-0.149489
13368061	AT1G14790	7.06175	7.61219	7.81724	7.66987	8.03267	7.72176	7.66746	7.84305	7.95638	7.55731	8.24784	8.18692	7.77356	8.20216	8.37186	8.2126	8.63969	8.19368	7.9059	8.31497	8.41695	8.17658	8.46312	8.10469	0.711808	0.589975	0.554618	0.542727	0.607021	0.471924	0.605713	0.230867	0.139138	-0.112561	0.215168	0.465157	0.132338	0.112805	0.045089	-0.036019	-0.176567	-0.08899	-0.473375	-0.118062	-0.094049	0.076542	-0.391735	-0.554147
13368415	AT1G15415	5.39901	5.40587	5.09858	5.36914	5.72542	4.99905	6.14513	5.54022	5.62671	5.39878	5.65668	5.67232	5.67634	5.52004	5.42933	5.57505	5.62405	5.5233	5.96615	6.05237	5.7479	6.44928	5.82384	6.22678	0.277338	0.114167	0.330747	0.205913	-0.101366	0.524252	0.746122	0.134348	0.528128	0.029645	-0.068737	0.673272	0.289806	0.532332	0.318572	0.874225	0.199786	0.703471	-0.456316	0.397984	-0.209556	0.84458	0.268523	0.030199
13369027	AT1G17090	6.0386	5.98741	6.9212	6.52044	5.2046	5.22562	5.348	5.49493	6.53303	6.34175	5.34269	5.03801	5.08149	5.61862	6.5382	6.31484	5.2301	5.45168	4.921	5.82409	6.52267	6.39757	5.34731	5.22987	-0.957112	-0.368791	-0.382993	-0.2056	0.025504	0.22606	-0.690601	-0.492476	-0.388166	-0.178688	0.138091	-0.187609	-0.160488	0.205472	-0.015532	0.08273	0.11721	-0.221814	0.530113	0.697948	0.372634	0.261418	-0.020881	-0.034205
13369306	AT1G17710	2.56952	3.10128	2.42933	3.30552	2.84971	2.73742	3.26151	2.92157	2.95691	2.99528	3.1764	2.87301	3.18848	2.74642	2.9674	3.32608	3.12113	2.90549	3.13327	2.92455	3.01194	2.91671	2.9776	3.02508	0.618964	-0.354869	0.538073	0.02056	0.271418	0.16807	0.691987	-0.179716	0.527583	-0.310244	0.326687	0.135582	-0.055211	0.178131	0.044537	-0.409375	-0.143531	0.11959	-0.747198	0.357847	-0.483046	-0.099131	-0.470218	-0.015992
13369662	AT1G18310	3.04658	3.96311	3.70034	3.70044	3.42689	3.75594	3.78637	3.79358	3.57632	3.58051	3.49222	3.51648	3.73023	3.93966	3.63775	3.5209	3.71705	3.54784	3.76374	3.57632	3.66126	4.11935	3.23482	3.56272	0.683648	-0.023451	-0.062596	-0.179541	0.290161	-0.208101	0.739787	-0.169529	-0.124024	-0.119927	0.065336	-0.239455	0.033506	-0.36334	0.023512	0.598453	-0.482227	0.014886	-0.706281	-0.193811	0.147536	0.71838	-0.547563	0.254341
13369708	AT1G18370	7.72167	7.25713	7.30092	7.45843	7.29533	7.56142	7.13923	7.26728	6.61097	7.13783	7.24834	6.59121	8.06963	7.3956	7.69181	8.45109	7.98675	8.15304	7.86839	7.04723	7.58077	8.23558	7.93	7.72364	0.347958	0.138467	0.390894	0.992658	0.691421	0.591621	-0.582444	0.01015	-0.689947	-0.320599	-0.046986	-0.970205	-0.201244	-0.348365	-0.111044	-0.215505	-0.056754	-0.429396	0.3812	-0.358515	0.578903	0.105094	-0.009768	0.540809
13369901	AT1G18990	2.38525	2.73183	3.13694	3.00385	2.79356	2.82483	3.04627	2.66577	3.01841	2.48932	2.50309	2.45064	3.02541	4.00718	3.4554	3.93007	3.90936	3.0463	3.07313	3.51444	3.25243	3.79449	3.81162	2.85134	0.640157	1.27535	0.318451	0.926217	1.1158	0.221469	0.66101	-0.066063	-0.118533	-0.514532	-0.290466	-0.374194	0.04772	-0.492747	-0.202971	-0.13558	-0.097734	-0.194954	-0.61329	-0.426684	-0.084438	0.378952	0.192732	0.17924
13370180	AT1G19780	2.72233	3.02653	3.24699	3.47555	2.97815	2.90981	3.39012	3.08318	2.95898	3.07829	2.72908	3.10646	3.26583	3.00945	3.21117	3.62115	3.13157	3.56962	3.21311	2.97344	3.03421	3.09527	3.5799	3.07829	0.543503	-0.017077	-0.035822	0.145599	0.153426	0.659803	0.667796	0.056653	-0.288017	-0.39726	-0.249068	0.196644	-0.052721	-0.036013	-0.176958	-0.52588	0.448322	-0.491326	-0.720517	-0.092666	0.111059	-0.12862	0.69739	-0.68797
13370258	AT1G19970	7.26666	6.7423	7.21875	7.9457	7.61127	8.12611	6.6712	6.63605	6.58534	7.35379	7.58615	7.97221	6.43707	7.02456	7.03805	7.13993	7.73266	7.46945	6.20047	6.78448	6.90402	7.36554	7.24641	7.49915	-0.829581	0.282262	-0.180708	-0.80577	0.121384	-0.656662	-0.595456	-0.106247	-0.633415	-0.591909	-0.025118	-0.153901	-0.236599	-0.24008	-0.13403	0.225614	-0.486241	0.029695	0.358857	-0.133833	0.499385	0.817523	-0.461123	0.183596
13370276	AT1G20040	3.34517	3.46371	3.25594	2.88257	2.42392	2.66251	2.63754	2.8876	2.90886	4.04777	3.0901	3.53405	3.49594	3.47273	3.30252	3.30181	2.91987	3.49612	3.71818	3.29208	3.21027	3.17252	2.84794	3.05359	0.150774	0.009026	0.046579	0.41924	0.495957	0.833614	-0.707636	-0.57611	-0.347079	1.1652	0.666188	0.871544	0.222234	-0.180655	-0.092254	-0.12929	-0.071938	-0.442528	0.92987	0.395455	0.254825	-1.29449	-0.738126	-1.31407
13370760	AT1G21120	8.69413	7.90363	6.10826	6.97191	6.36004	5.5603	9.43508	7.77879	7.47279	8.38166	6.56785	6.21371	9.55394	8.20356	7.66592	8.26344	7.70318	7.03379	10.0387	8.91941	8.32297	9.14618	7.55574	7.55232	0.859812	0.299928	1.55766	1.29153	1.34314	1.47349	0.740952	-0.124841	1.36453	1.40975	0.207818	0.653408	0.484768	0.715857	0.657049	0.882742	-0.14744	0.518529	-0.256184	0.840698	-0.707482	-0.527007	-0.355258	-0.134879
13370816	AT1G21327	3.85246	3.73516	3.14054	3.25076	3.49464	3.89235	2.9603	3.19342	3.08796	3.20438	3.51469	3.20848	3.54741	2.9729	3.07874	3.2456	3.45818	3.95329	3.22309	3.44753	3.4847	3.54746	3.05638	3.21621	-0.305049	-0.762266	-0.061805	-0.005163	-0.036456	0.060934	-0.892158	-0.541742	-0.052585	-0.046377	0.020052	-0.683876	-0.324326	0.474631	0.405959	0.301865	-0.401802	-0.737076	0.567832	1.01637	0.458544	0.348242	-0.421854	-0.0532
13370848	AT1G77030	4.52954	5.09531	5.23043	4.51433	4.91505	5.44063	5.52325	5.55529	5.47382	4.54553	5.30177	4.88993	5.34514	5.33472	5.81263	5.86871	5.69639	5.8702	5.46014	5.79498	5.01941	5.25845	5.62615	5.55524	0.815603	0.239413	0.582206	1.35439	0.781339	0.429572	0.993714	0.45998	0.243399	0.031201	0.386727	-0.550702	0.115002	0.460254	-0.793226	-0.610267	-0.07023	-0.314962	-0.878712	0.000274	-1.03662	-0.641468	-0.456957	0.23574
13370899	AT1G21528	4.76813	4.50602	4.13888	4.68745	5.36085	5.09599	4.19622	4.5831	4.26874	4.54773	5.05595	4.41299	4.21729	3.93243	3.79446	4.08062	4.41572	4.38263	4.03568	4.17778	4.4344	5.02772	4.2754	4.73306	-0.550833	-0.573589	-0.34442	-0.606831	-0.945134	-0.713361	-0.571909	0.077079	0.129859	-0.139727	-0.304902	-0.682996	-0.18161	0.245346	0.63994	0.947094	-0.140316	0.35043	0.390299	0.168267	0.510081	1.08682	0.164586	1.03343
13371009	AT1G77030	4.52954	5.09531	5.23043	4.51433	4.91505	5.44063	5.52325	5.55529	5.47382	4.54553	5.30177	4.88993	5.34514	5.33472	5.81263	5.86871	5.69639	5.8702	5.46014	5.79498	5.01941	5.25845	5.62615	5.55524	0.815603	0.239413	0.582206	1.35439	0.781339	0.429572	0.993714	0.45998	0.243399	0.031201	0.386727	-0.550702	0.115002	0.460254	-0.793226	-0.610267	-0.07023	-0.314962	-0.878712	0.000274	-1.03662	-0.641468	-0.456957	0.23574
13371064	AT1G21928	4.51634	5.33425	4.8614	4.96469	4.9848	5.47712	5.60767	4.9971	5.05669	5.27013	4.7888	4.89744	6.19163	6.00453	5.31731	5.38493	5.5312	5.49001	5.93012	5.42667	5.71143	5.2468	5.62923	5.29581	1.67529	0.670276	0.455913	0.420239	0.546405	0.012885	1.09134	-0.337156	0.195285	0.305436	-0.196001	-0.579682	-0.261511	-0.577861	0.394117	-0.138131	0.098028	-0.194196	-1.35285	-0.240705	0.198832	-0.443567	0.294029	0.385486
13371081	AT1G22015	2.69567	3.07657	3.47913	2.69164	3.36647	2.87581	3.33957	2.87228	2.83625	2.74395	3.09065	2.76087	3.02164	3.20023	3.21576	3.38722	3.48497	3.15334	3.16907	3.0022	3.65156	2.86253	3.17092	3.22947	0.325969	0.123662	-0.263373	0.695584	0.118496	0.277531	0.643898	-0.204289	-0.642881	0.052311	-0.275823	-0.11494	0.14743	-0.198031	0.4358	-0.52469	-0.314051	0.076129	-0.496468	0.006258	1.07868	-0.577001	-0.038228	0.191069
13371241	AT1G22340	4.06819	5.01106	5.05944	4.74163	5.5711	5.32099	4.72586	5.07129	5.22711	4.95889	5.82947	6.30363	5.82957	5.61227	5.66322	5.92704	6.44835	6.68496	5.29329	5.81764	6.19398	6.54088	6.61532	7.26702	1.76138	0.601209	0.603781	1.18541	0.87725	1.36397	0.657669	0.060225	0.167676	0.217255	0.258374	0.982642	-0.536281	0.205372	0.53076	0.613835	0.166969	0.582064	-1.19395	0.145147	0.363084	0.39658	-0.091405	-0.400578
13371286	AT1G22470	5.38461	5.73322	5.15302	4.17318	4.12228	4.21049	4.76951	5.06225	4.08584	4.55231	4.10372	3.92687	5.17007	6.19913	5.7075	4.42517	4.49017	4.0189	5.51991	5.3249	5.29445	4.23577	4.33806	4.07025	-0.214537	0.46591	0.554476	0.251995	0.367895	-0.191586	-0.615101	-0.670972	-1.06718	0.379132	-0.01856	-0.283617	0.34984	-0.874232	-0.41305	-0.189402	-0.152107	0.051353	0.964941	-0.20326	0.654134	-0.568534	-0.133547	0.33497
13371398	AT1G22767	3.68643	4.49285	5.36675	4.23516	3.6749	3.87609	2.8937	4.03071	3.63975	3.21248	4.91635	3.97397	3.4063	3.92478	3.90174	3.23257	3.42714	4.30626	3.88314	3.45067	3.30363	3.12834	4.2281	3.78862	-0.280129	-0.568063	-1.46501	-1.00259	-0.247758	0.430167	-0.792733	-0.462138	-1.727	-1.02268	1.24145	0.09787	0.476842	-0.474115	-0.598116	-0.104235	0.800962	-0.517646	1.26957	-0.011977	1.12888	0.918444	-0.440487	-0.615516
13371444	AT1G22980	4.70198	4.33056	4.58955	4.15579	4.39922	3.71839	4.03846	4.67184	4.99582	4.73527	4.22483	4.01552	5.36518	5.77612	6.18019	5.34457	5.70919	6.22792	5.55347	5.58926	6.6759	5.74783	5.59825	6.40629	0.663206	1.44556	1.59064	1.18878	1.30997	2.50953	-0.663512	0.341285	0.406268	0.579478	-0.174392	0.297132	0.188287	-0.186862	0.495702	0.403261	-0.11094	0.178375	0.851799	-0.528147	0.089434	-0.176217	0.063452	-0.118757
13371740	AT1G23640	3.44324	3.29939	3.44206	3.23249	2.822	3.1678	2.75319	3.97672	3.03015	3.68815	4.45498	5.69324	2.97647	3.12378	2.62866	2.60047	2.91065	2.71093	2.79675	2.5086	2.53722	2.738	2.91685	3.24118	-0.466771	-0.175605	-0.813403	-0.632018	0.08865	-0.45687	-0.690049	0.677329	-0.411913	0.455663	1.63297	2.52544	-0.179721	-0.615184	-0.091438	0.137534	0.006196	0.530258	0.510328	-1.29251	0.320475	-0.318129	-1.62678	-1.99518
13371799	AT1G23770	6.32845	5.64423	6.15986	5.85325	5.80679	6.30352	5.199	6.5058	5.70864	5.58746	5.29566	6.26999	4.96592	4.93016	5.3774	5.00871	4.73112	5.27823	5.11876	5.24769	5.01771	5.1798	6.0115	5.02105	-1.36253	-0.714061	-0.782457	-0.84453	-1.07567	-1.02529	-1.12944	0.861576	-0.451221	-0.265781	-0.511129	-0.033535	0.152845	0.317529	-0.359687	0.171088	1.28037	-0.257177	1.28228	-0.544047	0.091534	0.436869	1.7915	-0.223642
13372361	AT1G25510	4.48517	4.18237	4.26702	4.49878	4.3599	4.54162	3.75308	4.22196	4.08195	4.45804	4.45856	3.84514	4.5286	4.74879	4.36572	4.89582	4.33352	4.59327	4.50665	4.57043	4.2331	4.70951	4.7295	4.52631	0.043438	0.566417	0.098702	0.39704	-0.026379	0.051651	-0.732089	0.039586	-0.185065	-0.04074	0.098656	-0.696478	-0.021952	-0.178352	-0.132617	-0.186303	0.395977	-0.066959	0.710137	-0.217938	0.052448	-0.145563	0.297321	0.629519
13372568	AJ505672	6.17287	5.04358	5.10182	6.02663	5.85466	5.39426	5.39635	4.91997	6.12846	5.45871	5.48912	4.95892	5.10596	5.40767	5.35998	5.23273	4.89933	5.02204	5.39508	5.49829	6.01814	5.2588	5.86976	5.32179	-1.0669	0.36409	0.258151	-0.793906	-0.955326	-0.372229	-0.77652	-0.123612	1.02664	-0.567926	-0.365543	-0.435347	0.289119	0.090617	0.658164	0.026072	0.970428	0.299759	1.06564	0.214229	-0.368474	0.593998	1.33597	0.735106
13372600	AT1G26355	5.20663	5.90487	5.72475	5.72921	5.30639	5.31473	5.85013	5.8017	5.66669	5.60452	5.58305	5.43942	5.72227	5.99339	5.88975	5.7875	5.1508	5.30711	5.50004	5.53489	5.54876	5.40094	5.57714	5.02514	0.515643	0.088517	0.165002	0.058284	-0.155589	-0.007619	0.643506	-0.103176	-0.058053	-0.124694	0.276665	0.124684	-0.222233	-0.458499	-0.340988	-0.386556	0.426339	-0.281973	-0.865739	-0.355323	-0.282935	-0.261862	0.149674	-0.406657
13372724	AT1G26720	5.05673	5.50371	4.8764	5.19557	5.16233	5.41296	5.84467	4.38708	5.08536	5.60649	5.15393	4.87816	5.00015	6.01118	4.87577	4.94147	5.46524	5.55229	5.15464	4.81245	4.89043	5.02582	5.02696	5.30559	-0.056576	0.507466	-0.000631	-0.254098	0.302906	0.139336	0.787944	-1.11663	0.208965	0.410921	-0.008396	-0.534793	0.154488	-1.19872	0.014661	0.084351	-0.438282	-0.246701	-0.633456	-0.082094	-0.194304	-0.32657	-0.429886	0.288092
13373406	AT1G28610	5.43596	6.76196	6.4957	6.22602	7.36633	7.82437	6.05578	6.03654	7.03216	6.56249	7.75981	7.89076	6.93307	7.73289	7.37378	5.98526	7.34657	8.08041	7.31642	7.92616	7.64375	5.78819	7.67545	8.38826	1.49711	0.970927	0.878075	-0.240762	-0.019758	0.25604	0.61982	-0.725427	0.536455	0.336469	0.39348	0.066394	0.383353	0.193267	0.269973	-0.197073	0.328879	0.307849	-0.236467	0.918694	-0.266482	-0.533542	-0.064601	0.241455
13374244	AT1G30780	2.9235	3.4165	2.88599	3.375	3.36267	3.2949	3.80136	3.08099	2.66082	3.20828	2.90352	3.09615	3.65517	3.61834	3.20362	3.81339	4.25951	3.5581	3.78533	4.12002	4.15182	3.92426	3.58927	3.64538	0.731671	0.201841	0.317623	0.438391	0.896847	0.263203	0.877861	-0.33551	-0.225169	-0.166727	-0.45915	-0.198747	0.130153	0.501681	0.948198	0.110869	-0.670241	0.08728	-0.747708	0.837191	1.17337	0.277596	-0.211091	0.286027
13374336	AT1G31000	3.27256	3.72085	4.63629	3.94947	3.74371	4.13891	4.08719	4.69481	3.64417	3.83077	3.65155	4.15851	4.06437	4.44244	3.69024	2.94949	3.81562	3.62514	4.01575	3.734	3.34885	3.70232	4.23959	4.05036	0.79181	0.721581	-0.946054	-0.999986	0.071908	-0.513768	0.81463	0.973954	-0.992127	-0.118702	-0.092163	0.019609	-0.048623	-0.708441	-0.34139	0.752832	0.423973	0.42522	-0.863253	-1.6824	0.650737	0.871534	0.516136	0.405611
13374440	AT1G31319	2.66296	4.76782	2.68566	3.07154	2.59677	3.09561	3.6144	2.91275	2.78472	3.0497	2.75709	2.91977	3.44998	3.18289	3.49412	3.02829	3.02738	3.01273	3.3209	3.2643	3.37723	2.88166	2.87138	3.51297	0.787019	-1.58493	0.808457	-0.04325	0.430611	-0.082875	0.951436	-1.85508	0.09906	-0.02184	0.160319	-0.175841	-0.129081	0.081404	-0.116895	-0.14663	-0.155995	0.50024	-1.08052	1.93648	-0.215955	-0.12479	-0.316314	0.676081
13374467	AT1G31380	5.17531	5.06718	6.03352	4.49158	5.27414	5.83415	4.3654	5.75078	5.04808	5.66773	4.76738	5.31116	2.64896	2.94618	2.93992	2.96158	2.9418	2.91439	2.89742	2.90667	3.08251	2.88413	3.15569	2.94536	-2.52636	-2.121	-3.0936	-1.53001	-2.33234	-2.91976	-0.809912	0.683604	-0.985441	1.17615	-0.506763	-0.52299	0.248466	-0.039508	0.142587	-0.077453	0.213888	0.030973	1.05838	-0.723112	1.12803	-1.2536	0.720651	0.553963
13374672	AT1G31820	5.11693	5.42717	6.0245	5.58066	6.61584	6.93227	5.80277	5.83955	6.42259	6.10637	6.74447	6.84643	4.24091	4.37467	4.26132	4.31959	4.04586	4.21653	4.23939	4.40701	3.67781	4.00565	3.79226	4.1598	-0.876012	-1.0525	-1.76318	-1.26106	-2.56998	-2.71574	0.685841	0.412374	0.398094	0.52571	0.128632	-0.085839	-0.001522	0.032342	-0.583515	-0.31395	-0.253597	-0.056732	-0.687363	-0.380032	-0.981609	-0.83966	-0.382229	0.029107
13374931	AT1G32610	5.54836	5.58506	5.50637	5.72846	5.27501	5.33008	4.88347	5.32229	5.34943	5.74144	5.54522	5.56572	5.41911	5.01161	5.27509	5.32719	5.33251	5.06677	4.98754	5.11191	5.19506	5.43288	4.91462	4.99045	-0.129248	-0.573451	-0.231279	-0.401267	0.057501	-0.263309	-0.664892	-0.262776	-0.156938	0.01298	0.270209	0.235644	-0.43157	0.100303	-0.080034	0.105685	-0.417894	-0.076322	0.233322	0.363079	0.076904	0.092705	-0.688103	-0.311966
13375044	AT1G32970	3.18865	3.40906	2.84358	3.54302	3.3416	3.74083	3.78271	3.22964	3.45593	3.16762	3.17793	3.01817	3.82558	3.42834	3.69505	3.62072	3.36103	3.42069	3.49376	3.24419	3.658	3.2701	3.18335	3.76717	0.636922	0.019278	0.851468	0.077694	0.019431	-0.320143	0.594059	-0.179426	0.612347	-0.375405	-0.163664	-0.722663	-0.33182	-0.18415	-0.037049	-0.35062	-0.177684	0.346488	-0.925879	-0.004724	-0.649396	0.024785	-0.01402	1.06915
13375294	AT1G33850	2.29103	2.4838	2.4602	2.38807	2.5333	2.54535	2.99423	2.43641	2.30806	2.34493	2.90935	2.62092	3.80404	2.89458	3.35319	2.90058	3.34483	3.02446	3.39214	3.60033	2.50993	3.18838	3.36482	2.63481	1.513	0.410783	0.892994	0.512511	0.811522	0.479106	0.703193	-0.047384	-0.152133	-0.043144	0.376047	0.075564	-0.411902	0.70575	-0.843257	0.287797	0.019994	-0.389655	-1.11509	0.753134	-0.691124	0.330941	-0.356053	-0.465219
13375313	AT1G33900	3.89027	3.82542	3.39121	3.66367	3.25064	3.47279	2.92605	4.08875	3.3574	3.23106	3.04521	3.31043	3.97778	3.81219	3.53191	3.93967	4.02549	3.24726	4.09634	3.75401	3.67765	3.56824	3.67442	3.67431	0.087515	-0.013222	0.140699	0.276003	0.774843	-0.225531	-0.96422	0.263333	-0.033816	-0.432602	-0.205434	-0.162357	0.118559	-0.058185	0.145737	-0.371427	-0.351063	0.427052	1.08278	-0.321518	0.179553	0.061175	-0.145629	0.589409
13375362	AT1G34047	4.36303	3.71197	3.45858	3.98682	4.73211	3.66976	3.23967	4.33378	3.68919	4.51204	3.62496	3.62564	4.30715	3.91077	3.61238	4.0827	3.83384	4.65629	3.75401	3.63056	4.07422	3.7221	4.54143	3.85467	-0.055886	0.198797	0.153799	0.095873	-0.898266	0.986533	-1.12337	0.621812	0.23061	0.525218	-1.10715	-0.044114	-0.553133	-0.280201	0.46184	-0.360598	0.707585	-0.801624	0.570235	-0.902013	0.23123	-0.885816	1.81474	-0.75751
13375436	AT1G34280	3.32931	4.87226	4.88936	4.27207	4.6175	5.13594	4.65631	5.22259	3.72163	4.31955	4.00269	4.62077	4.06321	4.18792	4.21972	4.30854	3.73745	4.1135	4.1347	3.89515	3.8737	3.73333	4.04641	4.67059	0.733905	-0.684342	-0.669643	0.036471	-0.880044	-1.02245	1.327	0.350327	-1.16773	0.047477	-0.614807	-0.515175	0.071482	-0.292772	-0.346012	-0.575214	0.308962	0.557094	-1.25552	-0.643099	0.821718	-0.622691	0.923769	1.07227
13375618	AT1G35250	3.04663	3.97164	3.65302	4.09861	3.86949	3.91358	3.91358	3.75964	3.62572	4.41492	3.91358	3.91358	4.06178	3.91358	3.91358	3.43129	3.7245	3.41044	4.00922	3.6884	3.35118	4.01124	4.01957	3.47464	1.01515	-0.058065	0.260554	-0.66732	-0.144988	-0.503136	0.866947	-0.212001	-0.027306	0.316314	0.044087	0	-0.052556	-0.225179	-0.562397	0.579951	0.295069	0.064196	-0.919503	-0.013178	-0.535091	0.263637	0.250982	0.064196
13375625	AT1G35255	2.63488	2.87684	3.75115	3.07798	2.79645	2.93421	3.46082	3.14604	3.246	3.2236	2.62478	2.68133	2.93421	2.93198	3.12186	3.11971	2.77022	2.84616	2.66781	2.93421	2.98836	3.01537	2.7666	2.67846	0.299339	0.055136	-0.629295	0.041732	-0.026224	-0.088052	0.825945	0.269192	-0.505155	0.14562	-0.171669	-0.25288	-0.266407	0.002233	-0.133492	-0.104336	-0.003625	-0.167698	-1.09235	-0.266959	0.371663	-0.249956	0.168044	0.085182
13375634	AT1G35290	4.94045	4.1857	3.53619	3.71118	4.27644	5.11358	4.02394	4.22763	3.60305	3.74824	5.62681	4.34098	4.11757	4.88492	4.06856	4.47973	5.30963	5.57073	4.36334	4.06898	4.30843	3.70826	5.13166	5.46276	-0.822882	0.699214	0.532374	0.768547	1.03319	0.457147	-0.916508	0.041924	0.066861	0.037056	1.35036	-0.772604	0.245767	-0.815944	0.239869	-0.771469	-0.177968	-0.10797	1.16227	-0.857868	0.173008	-0.808525	-1.52833	0.664634
13375731	AT1G35630	3.14988	3.43512	3.80019	3.59776	4.36275	3.8281	3.93088	3.75881	4.07897	3.71141	3.64362	4.09473	4.15767	3.83463	4.41615	4.28552	3.8509	3.72819	4.03422	3.54369	3.96247	3.64624	3.4989	4.22804	1.00779	0.399512	0.615959	0.687763	-0.511844	-0.099909	0.781	0.323692	0.278781	0.113649	-0.719129	0.266628	-0.123447	-0.290936	-0.453685	-0.639289	-0.352006	0.499848	-0.904447	-0.614628	-0.732466	-0.752938	0.367123	0.23322
13375792	AT1G36020	4.26457	4.21046	5.1156	3.54022	4.04538	5.23796	2.85451	5.50305	3.81117	2.85203	2.8127	5.02812	3.73003	3.3387	3.53395	3.01106	4.07355	3.74994	3.74994	3.12009	2.70578	3.56507	4.79472	4.1968	-0.534541	-0.871763	-1.58164	-0.529157	0.028174	-1.48802	-1.41007	1.29258	-1.30443	-0.688188	-1.23268	-0.209839	0.019905	-0.218609	-0.828173	0.554001	0.721171	0.446862	1.42997	-1.51119	0.476258	1.24219	1.95385	0.656701
13375984	AT1G41880	5.3134	4.752	5.01024	5.205	4.93846	5.2661	4.71935	4.80561	5.34636	5.07344	5.04302	5.0608	5.72056	5.54997	5.66227	6.04813	5.92876	6.14202	5.92185	6.06937	5.74083	6.08412	5.63006	5.73981	0.40716	0.797972	0.652032	0.843128	0.990297	0.87592	-0.594052	0.053608	0.336118	-0.131559	0.104565	-0.205304	0.201289	0.519403	0.078561	0.035992	-0.298695	-0.402212	0.795341	0.465795	-0.257557	0.167551	-0.40326	-0.196908
13376091	AT1G43310	7.32013	7.13408	7.0734	6.49003	6.27118	6.01495	6.55996	6.95869	6.51104	6.44251	6.64659	7.15086	5.54287	5.6641	5.4215	5.98021	5.13786	5.11553	5.35553	5.5502	5.60004	5.12594	5.66151	5.21558	-1.77726	-1.46998	-1.6519	-0.509814	-1.13333	-0.899421	-0.76017	-0.175389	-0.562361	-0.047515	0.375406	1.13591	-0.187334	-0.113897	0.178539	-0.854275	0.523651	0.100053	0.572836	0.061492	0.7409	-0.80676	0.148245	-1.03586
13376380	AT1G44990	6.04162	6.36639	6.44407	6.7348	6.1044	7.50073	5.13977	7.08111	4.9172	5.53203	4.96403	6.52946	4.48902	3.94789	4.53523	4.38487	4.51287	3.57742	4.16218	4.35905	3.60824	3.35561	4.33648	4.40412	-1.5526	-2.4185	-1.90884	-2.34993	-1.59153	-3.92331	-0.901852	0.71472	-1.52687	-1.20277	-1.14037	-0.971275	-0.326848	0.411158	-0.926985	-1.02926	-0.176385	0.826702	0.575004	-0.303562	0.599884	0.173506	0.963987	1.79798
13376546	AT1G46768	5.50558	4.65558	4.57358	6.09039	5.64672	5.44063	6.23484	5.07611	5.19375	6.28823	4.9531	4.90073	5.5264	4.28968	4.71514	6.0199	5.29924	5.8552	5.32543	5.39244	5.29445	6.21769	5.35449	5.39571	0.020822	-0.365899	0.141554	-0.070486	-0.347474	0.414569	0.729261	0.420532	0.620168	0.197846	-0.693618	-0.539899	-0.200977	1.10276	0.579314	0.197785	0.055242	-0.45949	-0.930238	0.682232	-0.040854	-6.1e-05	0.74886	0.080409
13376955	AT1G48390	5.19683	4.12683	4.29469	4.27781	4.49445	4.07388	3.94298	3.92881	3.8503	3.75651	4.60336	3.29484	2.93311	3.21167	2.96622	2.14176	2.95757	3.25316	2.95502	2.68464	2.70583	2.84455	3.57871	2.67386	-2.26372	-0.915157	-1.32846	-2.13605	-1.53688	-0.820724	-1.25385	-0.19802	-0.444385	-0.521297	0.108908	-0.779043	0.021909	-0.527035	-0.260395	0.702796	0.621145	-0.579295	1.27575	-0.329015	0.18399	1.22409	0.512237	0.199748
13377243	AT1G48870	5.262	5.872	5.75213	5.73238	5.94266	5.73705	5.96781	6.06764	5.24569	5.08109	5.84746	5.50465	5.78293	5.96251	5.96822	5.82318	6.07215	6.10227	5.86614	6.31867	6.10899	5.87849	5.98744	5.57386	0.520934	0.090508	0.216092	0.090799	0.129492	0.365226	0.705809	0.195632	-0.506438	-0.651289	-0.095203	-0.232401	0.083213	0.356159	0.140769	0.055309	-0.084716	-0.528412	-0.622596	0.160527	0.647207	0.706598	0.010487	-0.296011
13377524	AT1G49700	3.3893	3.18578	3.1051	2.85204	3.01658	2.61286	2.65421	2.9698	3.13047	3.19385	2.76444	3.09187	3.09294	3.52435	2.81699	2.88874	3.35266	3.3182	3.00201	3.01658	3.22539	3.01658	3.23056	2.92112	-0.296359	0.338576	-0.288115	0.036699	0.336077	0.705335	-0.735091	-0.21598	0.025363	0.341807	-0.252137	0.479008	-0.090931	-0.50777	0.408397	0.127845	-0.122094	-0.397078	0.64416	-0.29179	0.383034	-0.213962	0.130043	-0.876086
13377606	AT1G49938	5.79435	5.91127	6.09749	5.76718	5.47891	5.46382	5.02093	5.65104	5.93335	5.47251	5.92775	5.58653	5.03848	5.17582	5.3443	4.74013	4.74974	4.36762	4.89266	5.05749	5.08279	5.4338	5.22882	5.2048	-0.755878	-0.735448	-0.753184	-1.02705	-0.729179	-1.0962	-0.773424	-0.260236	-0.164132	-0.294674	0.448839	0.122707	-0.145821	-0.118338	-0.261517	0.693668	0.479083	0.837181	0.627603	0.141898	-0.097385	0.988342	0.030244	0.714474
13377858	AT1G50325	3.74	3.03059	3.20915	3.2157	3.31079	2.91368	3.10308	3.4019	3.20887	3.64926	3.20663	3.01718	3.47803	3.01801	2.96628	3.10396	3.45202	3.39268	3.25166	3.42502	3.17782	3.56196	2.97086	3.65699	-0.261972	-0.012578	-0.242865	-0.111735	0.141236	0.479003	-0.636925	0.371311	-0.000274	0.433556	-0.104158	0.103503	-0.226371	0.407009	0.211533	0.457994	-0.48116	0.264309	0.410554	0.035698	0.211807	0.024438	-0.377002	0.160806
13377955	AT1G50590	5.71514	5.64597	6.05126	6.20649	6.1431	5.81901	4.84064	5.29505	5.63912	5.85134	5.56842	5.28605	5.5085	5.97164	5.91253	6.10544	6.58852	5.91146	4.95404	5.43103	6.39098	5.78654	5.55253	5.44104	-0.206637	0.325665	-0.138737	-0.101052	0.445422	0.092448	-0.874492	-0.35092	-0.412149	-0.355155	-0.574684	-0.53296	-0.554461	-0.540602	0.478449	-0.318896	-1.03599	-0.47042	0.320031	-0.189682	0.890598	0.036259	-0.461306	0.06254
13377994	AT1G50691	3.18008	4.25009	4.71875	4.68782	3.85266	4.33546	4.77012	4.03047	4.11183	4.51535	3.71074	4.61328	3.76205	3.86719	3.74859	3.6047	3.28821	3.60222	3.50134	3.65838	3.13512	4.26305	3.55909	4.72587	0.581965	-0.382898	-0.970157	-1.08312	-0.56445	-0.733239	1.59004	-0.219618	-0.606917	-0.172475	-0.141913	0.277822	-0.260712	-0.208814	-0.613473	0.658347	0.270887	1.12365	-1.85075	0.010804	-0.006556	0.830822	0.4128	0.845825
13378027	AT1G50790	5.50369	4.82722	5.40551	6.31767	5.49884	5.07575	4.87687	5.01292	5.64607	5.58078	4.78984	4.68499	5.26687	5.41502	5.25619	5.88245	5.42256	5.24245	5.12844	5.07084	5.85271	5.54884	5.68637	5.35894	-0.236825	0.587801	-0.149313	-0.435219	-0.076284	0.166698	-0.626823	0.185701	0.240567	-0.736887	-0.709008	-0.390768	-0.138433	-0.34418	0.596518	-0.333614	0.263808	0.116493	0.48839	-0.529881	0.355951	0.403273	0.972816	0.507261
13378179	AT1G51460	5.99457	6.45058	6.67035	6.46086	5.60894	5.36873	5.09944	6.6532	6.76225	6.14106	5.67063	5.23595	5.71254	6.33839	6.61767	6.53636	5.90672	5.50038	5.25233	6.68873	6.98893	6.24118	4.98009	5.38771	-0.282024	-0.11219	-0.052671	0.075501	0.297785	0.131653	-0.895124	0.202619	0.091902	-0.3198	0.061689	-0.13278	-0.460216	0.350332	0.371256	-0.295181	-0.926636	-0.112678	0.434908	0.147713	0.279354	0.024619	-0.988325	0.020102
13378434	AT1G51910	3.29747	3.48575	2.91488	2.79172	2.53628	2.72166	2.54898	2.8606	3.03248	2.75322	2.9863	2.9553	2.8606	2.88678	3.51104	3.05059	2.54371	3.14385	2.99405	2.93047	3.13672	2.82953	2.77132	2.75181	-0.43687	-0.598973	0.596162	0.258874	0.007428	0.422193	-0.748488	-0.625153	0.117602	-0.0385	0.450023	0.233634	0.133452	0.043695	-0.374321	-0.221056	0.22761	-0.39205	0.88194	0.668848	-0.491923	-0.182556	-0.222413	-0.625684
13378519	AT1G52100	3.66868	3.9246	4.98187	3.64314	3.73312	3.36357	4.3449	4.03484	4.39008	3.43137	3.4964	3.84839	4.79421	4.87894	5.44235	4.47161	5.17256	4.31854	4.78544	5.07554	4.54955	4.48793	5.38985	4.58454	1.12553	0.954345	0.460477	0.828466	1.43944	0.954967	0.676224	0.110246	-0.591798	-0.211772	-0.236718	0.484821	-0.00877	0.196595	-0.892797	0.016324	0.217288	0.265998	-0.684994	0.086349	-0.300999	0.228096	0.454006	-0.218823
13378545	AT1G52130	4.37637	3.45325	3.40509	3.82284	4.0424	4.4432	2.99358	3.86041	2.70165	3.13273	3.45325	4.5152	3.22155	3.47261	3.53514	3.35431	3.45325	4.02345	3.25935	3.06406	3.01592	3.11823	3.45325	3.59367	-1.15482	0.019357	0.130054	-0.468525	-0.589145	-0.41975	-1.38279	0.407151	-0.703438	-0.690106	-0.589145	0.071996	0.037805	-0.408554	-0.519226	-0.236082	0	-0.429787	1.4206	-0.815705	0.184212	0.454024	0.589145	-0.501783
13378583	AT1G52180	2.74723	3.63056	3.57378	3.41452	3.40984	3.19884	3.6045	3.76577	3.25425	3.3797	3.6199	3.27366	2.9788	3.09281	3.27803	3.41683	2.77451	3.81586	2.93646	2.65618	3.81959	3.24617	3.074	3.40569	0.231567	-0.537749	-0.295746	0.002309	-0.635331	0.617023	0.857266	0.135205	-0.319525	-0.034826	0.210067	0.074825	-0.042342	-0.436632	0.541558	-0.17066	0.299495	-0.410175	-0.899608	-0.571837	0.861083	-0.135834	0.089428	-0.485
13378620	AT1G52270	7.58411	5.7926	6.03879	6.93843	7.16983	6.4646	6.86918	6.26385	5.99408	7.13117	7.0987	5.46089	3.42968	2.90155	2.79555	2.73519	3.07445	3.10656	2.88387	2.90611	3.43901	3.00437	3.51285	3.05888	-4.15443	-2.89105	-3.24324	-4.20324	-4.09538	-3.35804	-0.714926	0.47125	-0.044705	0.192737	-0.071129	-1.00371	-0.545809	0.004557	0.643462	0.269181	0.4384	-0.047678	0.169117	-0.466693	0.688167	0.076444	0.509529	0.956027
13378667	AT1G52390	5.47835	5.57417	5.88048	6.68968	5.41432	6.49861	4.569	5.72751	4.75395	5.67692	5.83686	6.52817	5.0515	5.29863	5.69696	5.08626	5.67266	5.72621	4.8895	5.36072	5.027	5.75117	6.77927	6.3985	-0.426854	-0.275532	-0.183524	-1.60342	0.258342	-0.772399	-0.909354	0.153344	-1.12653	-1.01276	0.422542	0.029555	-0.161993	0.062089	-0.669958	0.664912	1.10661	0.672288	0.747361	-0.091255	0.456574	1.67767	0.684069	0.642733
13378729	AT1G52560	3.88953	4.71674	4.26401	3.94524	4.76042	5.02697	4.75031	4.45223	4.47165	3.91677	4.94091	5.00843	4.51238	5.31577	4.95644	4.38519	6.23465	5.0375	4.71838	5.16766	4.77256	4.29333	5.32959	4.86832	0.622852	0.599033	0.692433	0.43995	1.47423	0.010527	0.860778	-0.264515	0.207643	-0.028472	0.18049	-0.018544	0.206001	-0.148114	-0.183884	-0.091854	-0.90506	-0.169177	-0.654777	0.116401	-0.391527	-0.063382	-1.08555	-0.150633
13378972	AT1G53260	5.75409	5.01218	5.33504	5.19997	4.90617	5.06889	4.68323	5.30536	4.57548	5.1562	4.89901	4.21935	5.13562	4.91843	4.97435	5.23407	5.36153	4.75772	5.10427	5.00121	5.42435	5.0224	5.22618	4.91012	-0.618473	-0.093742	-0.360691	0.034105	0.455367	-0.311173	-1.07086	0.293182	-0.759555	-0.043771	-0.007159	-0.849538	-0.03135	0.082775	0.449999	-0.211667	-0.135356	0.152402	1.03951	-0.210407	1.20955	-0.167896	-0.128197	1.00194
13378993	AT1G53282	3.41998	3.78801	4.59463	3.41754	3.90657	3.94582	4.29947	4.32831	3.87175	3.86662	3.63066	3.92003	3.32057	3.36377	3.22988	3.69911	3.71598	3.07264	3.58116	3.08283	3.76041	3.30914	3.24038	3.28011	-0.099403	-0.424236	-1.36475	0.281568	-0.190588	-0.873174	0.879492	0.5403	-0.722881	0.449087	-0.27591	-0.025785	0.260586	-0.280939	0.530533	-0.389962	-0.475602	0.207466	-0.618906	-0.821239	1.25341	-0.839049	-0.199692	0.233251
13379075	AT1G53480	4.55976	6.11686	7.93743	5.39766	4.69142	5.6633	6.36564	7.91267	7.29127	8.30291	5.44866	6.53864	8.08088	8.0944	8.02384	8.59572	7.94958	8.04516	8.35965	8.20651	8.27863	8.83578	8.24097	8.22886	3.52111	1.97754	0.086415	3.19806	3.25816	2.38186	1.80588	1.79581	-0.646161	2.90525	0.757241	0.875341	0.278777	0.112112	0.254789	0.240058	0.291391	0.183699	-1.5271	-1.6837	0.90095	-2.66519	-0.46585	-0.691642
13379124	AT1G53610	3.84124	4.18808	3.5291	3.71342	3.96293	3.63335	4.7143	3.99679	4.40196	3.51785	3.87317	3.89107	3.82943	4.15822	3.32281	3.214	3.82018	3.85373	4.11035	3.70298	3.48279	3.51649	3.5566	3.73992	-0.01181	-0.029865	-0.206286	-0.499428	-0.142756	0.220379	0.873055	-0.191295	0.872862	-0.195574	-0.089766	0.25772	0.280917	-0.455233	0.159974	0.302494	-0.263575	-0.113815	-0.592138	-0.263938	-0.712888	0.498068	-0.173809	-0.371535
13379301	AT1G54000	5.59448	5.64673	5.48401	5.03366	5.47758	4.9991	6.53925	5.88476	5.75819	5.9463	5.61351	5.3681	6.42958	5.60829	5.63457	5.60344	6.07215	6.36102	6.56522	5.96585	5.81541	6.17185	6.50183	6.251	0.835108	-0.038443	0.150562	0.569777	0.594576	1.36192	0.944774	0.238027	0.274177	0.912636	0.13593	0.368992	0.135634	0.35756	0.180839	0.568414	0.429676	-0.110026	-0.80914	0.119533	-0.093338	-0.344222	0.293746	-0.479018
13379677	AT1G54930	4.86221	4.37172	4.29371	4.88257	4.35346	4.52385	5.74276	3.99992	4.49728	4.61958	4.54429	3.73317	4.6062	4.86769	4.59988	5.2001	4.16688	4.68993	4.71474	4.27609	5.05499	5.34912	4.34787	4.78835	-0.256009	0.495976	0.306171	0.317527	-0.186581	0.166082	0.880556	-0.371797	0.203572	-0.262992	0.190825	-0.790682	0.108547	-0.591606	0.45511	0.149026	0.180984	0.098413	-0.772009	-0.219809	0.251538	0.412018	-0.009841	0.889095
13379722	AT1G55200	6.77856	6.23184	6.03683	5.76459	6.10399	5.39796	5.77243	5.48929	5.90247	5.71302	5.48929	4.91214	6.65565	6.7252	6.40402	6.52345	6.23636	6.05828	6.05828	5.89343	6.12915	5.81175	5.88441	5.18022	-0.122912	0.493366	0.367193	0.758857	0.132374	0.660317	-1.00613	-0.742553	-0.134361	-0.051572	-0.614703	-0.485819	-0.597371	-0.831777	-0.274866	-0.711694	-0.351958	-0.878058	0.408759	-0.089224	-0.140505	-0.660122	0.262745	-0.392239
13379870	AT1G55525	2.93864	4.07759	3.39616	4.04561	3.23281	4.26368	3.56855	4.05003	3.0738	3.71718	3.9234	5.0359	4.04114	4.03619	3.63946	3.77529	4.79504	4.22347	3.70206	3.60362	3.69597	3.6555	4.62008	4.02532	1.10251	-0.041398	0.243301	-0.270321	1.56224	-0.040202	0.629914	-0.027556	-0.322366	-0.328432	0.690588	0.772219	-0.339081	-0.432573	0.056506	-0.119781	-0.17496	-0.198154	-0.968995	-0.405017	0.378872	0.208651	-0.865548	-0.970373
13380044	AT1G55760	7.27904	6.34605	6.35816	6.91331	6.50458	7.39886	6.68823	6.48075	6.49184	6.79575	6.69526	7.27165	6.73205	6.81616	6.72856	7.09581	6.73658	6.65723	6.31803	6.51598	6.7404	6.86332	6.50056	6.79124	-0.546995	0.47011	0.370406	0.182502	0.232004	-0.741629	-0.590812	0.134701	0.133684	-0.117561	0.190678	-0.127207	-0.414017	-0.300175	0.011834	-0.232489	-0.236024	0.134016	0.176795	-0.434876	-0.12185	-0.114928	-0.426702	0.261223
13380109	AT1G55940	5.08851	4.18665	3.86155	4.30136	3.49442	3.63427	3.7743	3.80923	3.65641	3.7776	4.03887	4.51824	3.94333	3.82557	4.14964	3.94333	3.83039	3.94333	3.73525	3.7739	4.55778	3.92824	3.94333	3.94333	-1.14518	-0.361081	0.28809	-0.358029	0.335974	0.309055	-1.31421	-0.377425	-0.205143	-0.523758	0.544453	0.883971	-0.208078	-0.051677	0.408136	-0.015083	0.112935	0	1.10613	0.325748	0.613279	0.508675	-0.431518	-0.883971
13380344	AT1G56250	5.44663	4.19961	3.91685	3.06768	3.73476	4.27697	4.72954	3.48949	3.21682	4.53319	3.44022	3.70041	3.31924	2.82498	3.28599	3.07893	2.90444	2.80143	3.5351	2.99552	2.93421	3.39453	2.96495	2.88212	-2.12739	-1.37463	-0.630866	0.011252	-0.830315	-1.47554	-0.717092	-0.710121	-0.700031	1.46551	-0.294539	-0.576556	0.215864	0.170547	-0.351774	0.315599	0.060508	0.080697	0.932956	0.880668	0.348257	-1.14991	0.355047	0.657253
13380483	AT1G56630	2.96998	3.25071	3.54536	3.44631	3.55408	3.30461	3.72134	3.26345	3.26531	3.87433	3.20835	3.41046	3.72275	3.90361	3.52739	3.32378	3.15244	3.33163	3.63918	3.1874	3.49086	3.3425	3.09847	3.52004	0.752762	0.652897	-0.017978	-0.122535	-0.401645	0.027018	0.751354	0.012737	-0.280053	0.428018	-0.345734	0.105854	-0.083565	-0.716209	-0.036525	0.018722	-0.053962	0.188411	-0.834919	-0.728946	0.243528	-0.409296	0.291772	0.082557
13380528	AT1G57590	4.74791	5.18211	4.75625	4.39532	6.44547	8.58968	5.40473	5.34992	4.76491	4.58975	7.56341	8.71728	4.15135	4.23095	4.29143	3.78184	4.71159	5.48021	4.07005	3.34957	4.10777	3.4138	4.58998	5.73087	-0.596565	-0.951162	-0.464813	-0.613483	-1.73388	-3.10947	0.656825	0.167805	0.008663	0.194427	1.11793	0.127601	-0.081295	-0.881374	-0.183666	-0.368033	-0.12161	0.250659	-0.73812	-1.04918	-0.192329	-0.56246	-1.23954	0.123058
13380596	AT1G57750	2.80905	3.23102	3.18694	3.46967	3.24308	3.1438	3.41769	3.72636	3.42288	3.13653	3.26146	3.50798	3.52999	4.47357	3.20642	4.74359	5.74917	5.04795	3.3717	4.66227	2.99248	3.55594	4.0705	5.31243	0.720931	1.24254	0.019482	1.27392	2.50609	1.90415	0.608633	0.495337	0.235941	-0.333142	0.018381	0.364174	-0.158285	0.188701	-0.213941	-1.18765	-1.67867	0.264479	-0.766918	-0.306636	-0.449882	-0.854511	-1.69705	-0.099695
13380633	AT1G57860	6.48008	5.95865	6.78887	6.11464	6.03648	6.96504	5.71833	5.85013	6.53863	6.54927	5.89938	6.40524	2.4676	2.49834	2.53131	2.67931	2.79321	2.22108	2.33621	2.37091	2.11193	2.23723	2.12019	2.39653	-4.01247	-3.46032	-4.25756	-3.43532	-3.24328	-4.74396	-0.761749	-0.108527	-0.250242	0.434636	-0.137102	-0.559792	-0.131391	-0.127432	-0.41938	-0.442084	-0.673013	0.175455	0.630358	-0.018905	-0.169138	-0.87672	-0.535911	0.735247
13380841	AT1G58242	3.3317	3.88341	3.51692	3.56978	4.10359	4.02201	4.19416	4.26782	5.09443	3.67357	4.41251	3.65551	5.10254	5.44531	5.18302	4.63105	5.07327	5.00569	5.44278	5.89766	5.58936	5.46539	5.54755	5.17004	1.77084	1.5619	1.66609	1.06126	0.969684	0.983687	0.862465	0.384413	1.57751	0.103781	0.308922	-0.366494	0.340239	0.452352	0.406347	0.834349	0.474277	0.164345	-0.522226	0.067939	-1.17116	0.730568	0.165355	0.530839
13380846	AT1G58248	2.38525	2.9504	2.67202	3.11998	2.87077	3.00113	3.10029	2.91012	2.68586	2.55602	3.10948	2.75512	2.88678	3.0155	2.30095	2.47017	2.93208	2.48516	2.35939	3.34858	2.53635	2.46795	2.27591	2.61598	0.501523	0.065099	-0.371069	-0.64981	0.061304	-0.515963	0.715038	-0.040281	0.013841	-0.563961	0.238711	-0.246011	-0.52739	0.333081	0.235395	-0.002226	-0.656161	0.130819	-1.24243	0.373362	0.221554	0.561735	-0.894872	0.37683
13380905	AT1G58300	4.8379	4.62942	4.87291	4.78654	4.93296	5.46232	5.44858	4.59038	4.42733	4.10311	5.39173	7.18632	5.71366	5.3168	5.82098	5.0663	6.67193	6.48285	5.77875	5.18651	5.45654	5.44768	6.17438	6.52931	0.875754	0.687384	0.948071	0.279763	1.73897	1.02053	0.610678	-0.039035	-0.445576	-0.683428	0.458776	1.724	0.065094	-0.130288	-0.364435	0.381372	-0.497548	0.046459	-0.545584	-0.091253	0.081141	1.0648	-0.956324	-1.67754
13381128	AT1G59930	6.5262	6.69919	6.79261	6.76425	7.96076	7.5995	7.36362	6.57582	5.59387	6.08029	7.6194	7.2607	6.4276	6.61479	6.0665	5.95642	6.79648	6.77828	6.53242	6.24993	5.90639	6.09422	6.92949	6.14343	-0.098599	-0.084402	-0.72611	-0.807827	-1.16428	-0.821226	0.837414	-0.123375	-1.19874	-0.68396	-0.341353	-0.338806	0.104816	-0.364858	-0.160103	0.1378	0.133006	-0.634843	-0.732598	-0.241483	1.03864	0.82176	0.474359	-0.296037
13381302	AT1G60340	4.45916	4.90346	5.3699	5.30539	4.6685	5.05655	5.05156	5.48555	5.0937	4.70369	4.24329	5.82618	5.28218	5.97705	5.01646	4.80933	5.31901	4.91626	5.46017	5.10675	4.97469	4.76117	5.52911	5.04941	0.823016	1.07359	-0.353438	-0.496069	0.650508	-0.140291	0.592397	0.582096	-0.276202	-0.6017	-0.425213	0.769633	0.177996	-0.870298	-0.041775	-0.048151	0.210097	0.133149	-0.414401	-1.45239	0.234427	0.553549	0.63531	-0.636484
13381439	AT1G60630	6.50582	6.07251	6.06432	6.03462	6.07066	6.03885	5.88122	5.83405	5.95049	6.0742	6.15748	5.581	5.43845	5.66942	5.95191	5.60773	6.05625	5.95191	5.44554	5.45423	5.18062	5.72563	5.81387	4.89847	-1.06738	-0.40309	-0.112405	-0.426887	-0.014411	-0.086935	-0.624602	-0.238456	-0.113828	0.039582	0.086817	-0.457845	0.007098	-0.215189	-0.771287	0.117902	-0.242374	-1.05344	0.6317	0.023267	-0.657459	0.07832	-0.329191	-0.595593
13381771	AT1G61097	2.63292	3.07945	2.37102	2.79244	3.29392	2.81005	3.21867	3.03027	2.72008	2.59172	2.69685	2.97953	3.0731	2.94253	2.83699	2.73963	2.53067	2.56448	2.48145	3.12598	2.74831	3.20002	2.73536	3.01029	0.440179	-0.136912	0.465962	-0.052811	-0.763255	-0.245566	0.585749	-0.049178	0.349054	-0.200723	-0.597074	0.169485	-0.59165	0.183445	-0.088682	0.460393	0.204691	0.445807	-1.1774	0.232623	-0.437736	0.661116	0.801765	0.276322
13381823	AT1G61200	3.85278	4.53388	4.32457	4.01013	4.58092	4.12641	4.52604	4.13006	3.71703	3.74136	4.01013	3.81168	3.47199	3.4106	4.04822	4.57413	3.95498	3.71601	3.59826	3.77812	4.003	4.01013	3.69445	3.4467	-0.380797	-1.12327	-0.27635	0.563997	-0.625933	-0.4104	0.673255	-0.403817	-0.607539	-0.268767	-0.570787	-0.314724	0.126271	0.367516	-0.045225	-0.563997	-0.260538	-0.269302	-0.546984	0.771333	0.562314	-0.29523	0.310249	0.045422
13382169	AT1G62120	5.14052	4.77904	4.89743	5.27719	4.83162	4.90984	4.55877	5.104	5.01776	5.24386	5.02603	4.41764	4.90842	5.02603	5.31723	5.85831	4.91039	5.16276	4.9541	5.05836	5.42345	5.73134	5.2988	5.33104	-0.232095	0.246997	0.419802	0.581127	0.078768	0.252927	-0.581747	0.324969	0.120325	-0.033327	0.194412	-0.492198	0.045679	0.032332	0.106215	-0.126974	0.388413	0.168277	0.627426	-0.292637	-0.01411	-0.093647	0.194001	0.660475
13382333	AT1G62420	3.3245	3.72379	3.40073	2.77181	2.90635	3.02456	3.92468	3.45741	3.22706	2.88733	2.71948	2.58433	4.12579	3.65571	3.23864	2.84041	3.39762	3.03639	3.68857	3.67167	3.89008	3.02446	3.13873	2.79531	0.801297	-0.068076	-0.162088	0.068594	0.491275	0.011823	0.600184	-0.266383	-0.173668	0.115521	-0.186867	-0.440237	-0.437223	0.015959	0.651444	0.18405	-0.258897	-0.241078	-1.03741	0.282342	0.825112	0.068529	-0.07203	0.199159
13382424	AT1G62770	5.36113	5.982	5.82591	5.56622	5.26868	4.67634	6.11105	5.70211	5.74798	5.12932	4.88303	4.06251	6.3248	6.98015	6.90624	6.36683	6.26451	5.50548	6.32333	7.08991	7.17423	5.9394	5.55396	5.10306	0.96367	0.998153	1.08033	0.800613	0.995835	0.829135	0.74992	-0.279887	-0.077927	-0.436899	-0.385652	-0.613832	-0.001469	0.109761	0.267989	-0.427432	-0.710557	-0.402412	-0.751389	0.389648	0.345916	0.009467	-0.324905	0.21142
13382573	AT1G63100	7.12111	6.58332	6.5566	6.61818	6.40121	6.72781	6.41104	6.75853	5.85536	6.48734	6.25567	6.25826	7.29838	6.58698	6.68155	7.12725	6.89227	7.20732	6.84142	6.39533	6.31315	7.13781	7.04459	6.68155	0.177267	0.003654	0.124949	0.509072	0.491058	0.479509	-0.71008	0.175208	-0.701244	-0.130839	-0.145547	-0.469559	-0.456959	-0.19165	-0.3684	0.010558	0.152322	-0.525773	0.253121	-0.366858	0.332844	0.141397	0.297869	-0.056214
13382695	AT1G63370	5.84468	5.20715	5.45657	5.60506	5.40869	5.30962	5.11461	5.20516	5.65135	5.3003	5.48213	5.66409	6.39065	6.33058	6.22089	6.25849	5.77625	5.65774	6.59674	6.46362	6.31726	6.19122	5.80894	5.90981	0.545977	1.12343	0.764318	0.653436	0.367558	0.34812	-0.730062	-0.001991	0.194784	-0.304756	0.073439	0.354479	0.20609	0.133041	0.096372	-0.067268	0.032692	0.252075	0.936152	0.135032	-0.098412	0.237488	-0.040747	-0.102404
13382988	AT1G64020	3.12466	3.53114	3.10715	3.50854	3.29661	3.62533	3.73989	3.62444	3.48942	4.13377	3.55348	3.67542	4.4361	3.7956	3.88353	4.12822	4.19876	3.7296	4.07237	3.99425	4.33516	3.95893	3.7287	4.01231	1.31144	0.264456	0.776385	0.619678	0.902157	0.104272	0.615227	0.093292	0.382267	0.625227	0.256877	0.050094	-0.363727	0.198649	0.451626	-0.16929	-0.47006	0.282714	-0.978954	0.105357	0.069359	-0.794517	-0.726937	0.23262
13383004	AT1G64107	4.9995	4.40679	4.68289	5.221	4.3441	4.69408	4.04001	4.8989	4.81132	5.47382	4.76187	5.52293	4.68375	4.64938	4.17471	4.65937	4.01711	4.65487	4.72074	4.81625	4.38826	4.85262	4.78936	4.8553	-0.315746	0.24259	-0.508172	-0.561634	-0.326989	-0.039204	-0.959489	0.492108	0.128432	0.25282	0.417777	0.828855	0.036989	0.166862	0.213546	0.193253	0.772251	0.200429	0.996478	-0.325246	0.085114	-0.059567	0.354474	-0.628426
13383007	AT1G64110	4.73245	4.38722	4.2573	4.417	5.51645	6.72211	5.39676	5.04443	4.35788	4.33951	4.64601	6.7314	4.11789	4.21914	4.32616	4.41855	4.21667	4.31889	4.24832	4.48303	4.24476	3.65729	4.30353	4.46211	-0.614556	-0.168084	0.068866	0.001558	-1.29978	-2.40322	0.664318	0.657209	0.10058	-0.07749	-0.870444	0.009288	0.130435	0.26389	-0.081406	-0.761262	0.086858	0.14322	-0.533883	-0.393319	-0.181986	-0.683772	0.957302	0.133932
13383388	AT1G65120	5.07238	6.02598	6.4442	5.75278	4.69747	5.4196	4.01183	5.81413	6.50672	6.28751	5.06037	5.31737	5.54471	5.85338	6.31475	6.6432	5.43378	5.77976	5.07952	5.95693	6.88709	5.79251	5.51938	5.64545	0.47233	-0.172606	-0.129456	0.890426	0.736312	0.360155	-1.06054	-0.211856	0.062515	0.534736	0.362897	-0.102232	-0.465183	0.103549	0.572341	-0.850696	0.085602	-0.134312	0.595359	0.315405	0.509826	-1.38543	-0.277295	-0.03208
13383403	AT1G65130	3.48536	4.08705	4.08155	3.80338	4.10213	3.98284	4.16078	3.77506	3.65435	3.84014	3.76257	3.55999	3.92903	3.83623	4.19594	4.50589	3.88687	3.91004	3.81227	4.06782	3.88464	3.8934	3.40687	3.69004	0.443664	-0.250821	0.114388	0.702506	-0.215263	-0.0728	0.675419	-0.311989	-0.427205	0.036759	-0.339568	-0.422845	-0.116756	0.231592	-0.311304	-0.612489	-0.480004	-0.219997	-0.792175	0.543581	0.115901	-0.649248	-0.140436	0.202848
13383463	AT1G65330	3.57854	4.33872	2.90818	3.70833	3.41781	3.82051	4.53402	4.13364	3.35333	3.29321	3.46156	3.43427	3.77006	3.56893	4.08193	3.41206	3.57468	3.70169	4.25567	3.96011	3.99534	3.59464	3.7704	3.95713	0.191521	-0.769791	1.17375	-0.296271	0.156868	-0.118819	0.955483	-0.205082	0.445148	-0.415125	0.043747	-0.386245	0.485611	0.391187	-0.086584	0.182584	0.195716	0.255439	-0.469872	0.596269	-0.531732	0.597709	0.151969	0.641684
13383741	AT1G65910	4.90471	4.38708	4.0507	4.73095	4.17183	4.21822	4.12272	4.35196	4.38269	4.6783	4.06966	4.46351	5.0233	4.27437	5.00142	5.02815	4.80344	4.74524	4.7046	4.6713	4.82733	5.30507	4.67166	4.58735	0.118596	-0.11271	0.950723	0.297195	0.631608	0.527025	-0.781993	-0.035124	0.331999	-0.052657	-0.102175	0.245294	-0.31871	0.396927	-0.174084	0.276918	-0.131785	-0.157895	0.463283	0.432051	-0.506083	0.329575	-0.02961	-0.403189
13383801	AT1G65990	4.39069	3.99451	5.0438	3.76219	3.69905	4.38233	3.64503	4.94432	3.89975	3.99923	4.02621	4.26535	4.41197	4.13973	4.11344	3.81901	4.68026	4.08232	4.43611	4.95765	3.90235	4.53111	4.49643	4.39378	0.021288	0.14522	-0.930361	0.056823	0.981209	-0.300007	-0.745658	0.949809	-1.14405	0.23704	0.327156	-0.116977	0.024132	0.817917	-0.211093	0.71209	-0.183826	0.311461	0.76979	-0.131892	0.932961	0.47505	-0.510982	0.428438
13383815	AT1G66060	4.6393	5.31833	3.70561	3.2355	3.38846	3.5304	5.42262	4.85508	3.40096	3.2486	3.72539	3.22309	3.23357	2.81824	2.92725	3.15505	2.97015	2.76023	3.15632	2.82842	2.92798	2.99991	2.9824	2.9097	-1.40572	-2.50009	-0.778361	-0.080454	-0.41831	-0.770172	0.78332	-0.463246	-0.304651	0.013097	0.336929	-0.307314	-0.077255	0.010178	0.000724	-0.15514	0.01225	0.14947	-0.860575	0.473424	0.305375	-0.168237	-0.324679	0.456784
13383905	AT1G66270	4.81496	5.08653	5.2487	5.60686	5.1846	5.02392	4.11504	5.3699	4.63396	4.31963	4.69841	4.44215	5.29193	4.9513	4.50561	4.87702	4.81556	5.44534	4.79107	4.56548	4.52928	5.23508	5.12872	4.7108	0.476974	-0.135232	-0.743089	-0.729848	-0.369045	0.421419	-0.699917	0.283371	-0.614746	-1.28723	-0.486194	-0.58177	-0.500865	-0.385826	0.023668	0.358068	0.313163	-0.734545	0.199052	-0.669197	0.638414	1.6453	0.799357	-0.152775
13384025	AT1G66570	1.99367	1.92399	1.85372	1.85258	2.16387	1.9452	2.65421	2.19578	2.80025	2.18997	2.09155	3.48497	2.56075	2.18997	2.18997	2.17828	1.92946	2.12861	2.87108	2.03921	2.59443	2.17205	2.4326	2.54009	0.567073	0.265981	0.336251	0.325706	-0.23441	0.183408	0.660534	0.271789	0.946528	0.33739	-0.072318	1.53976	0.310332	-0.150763	0.404457	-0.006237	0.503134	0.411475	-0.350202	-0.422552	-0.542071	-0.343627	0.575452	-1.12829
13384031	AT1G66610	5.00274	4.58403	4.6505	4.68287	4.3671	4.98308	4.22254	5.06058	4.93101	4.43663	4.67707	4.61043	4.67995	4.76049	4.92697	4.84141	4.70523	5.07405	4.73912	4.64579	4.74446	4.5748	4.50253	4.42209	-0.322798	0.176459	0.276471	0.158549	0.33813	0.090962	-0.780203	0.476542	0.28051	-0.246233	0.309968	-0.37265	0.059172	-0.1147	-0.182507	-0.266616	-0.202699	-0.651955	0.839375	-0.591242	-0.463017	-0.020383	-0.512667	-0.279305
13384105	AT1G66855	2.11734	2.48639	2.26291	2.13385	2.36614	2.20053	2.97444	2.26291	2.01994	2.08432	2.36866	1.96438	2.26291	2.82256	2.41421	2.19893	2.6022	2.40023	2.35767	2.26291	2.18396	2.6315	2.18179	2.23387	0.145572	0.33617	0.151304	0.065083	0.236065	0.199703	0.857101	-0.223483	-0.242973	-0.04953	0.002521	-0.236146	0.094755	-0.559653	-0.230256	0.432567	-0.420414	-0.166358	-0.762346	-0.33617	0.012717	0.482097	-0.422935	0.069788
13384128	AT1G66960	4.91574	6.22934	5.53527	5.05063	4.33754	6.23844	5.53707	6.14114	6.29707	5.67313	6.43478	8.80044	5.19432	4.41282	5.72653	4.70632	4.6301	4.5928	5.04948	5.44298	5.62711	4.63197	4.56175	4.70411	0.278575	-1.81652	0.191255	-0.344303	0.292558	-1.64565	0.621325	-0.088197	0.761801	0.6225	2.09724	2.562	-0.144838	1.03017	-0.099416	-0.074352	-0.068343	0.111311	-0.766163	1.11837	-0.861217	-0.696852	-2.16558	-2.45068
13384169	AT1G67000	4.8694	4.27642	4.16972	4.93796	4.76994	4.71861	4.2423	4.41271	5.98288	4.92131	6.99965	7.55536	7.0437	7.45481	7.67184	7.39758	7.59915	7.69087	7.19399	7.55118	7.907	7.56983	8.21342	8.50924	2.1743	3.17839	3.50211	2.45963	2.82921	2.97226	-0.627105	0.136286	1.81316	-0.016649	2.22972	2.83675	0.150291	0.096374	0.235166	0.172246	0.614273	0.818377	0.777396	-0.039912	-1.57799	0.188895	-1.61545	-2.01837
13384377	AT1G67265	7.71601	8.5118	7.74625	6.1184	6.90896	5.45945	8.35914	8.33395	7.60353	5.15407	5.90332	5.73681	7.66137	8.71735	8.01031	5.50763	6.83593	5.8411	7.81226	8.27747	7.41878	5.6201	6.3168	5.25045	-0.054636	0.205549	0.26406	-0.610775	-0.073026	0.381658	0.643133	-0.177849	-0.142716	-0.964335	-1.00564	0.27736	0.15088	-0.439883	-0.591533	0.112471	-0.519132	-0.590654	-0.492253	-0.262034	-0.448817	1.07681	0.486505	-0.868014
13384593	AT1G67520	4.9089	4.87619	4.34565	5.40957	5.51791	4.398	5.68175	5.54695	5.51346	5.40936	5.50971	5.68574	7.09073	6.45619	6.89742	6.8395	6.58809	6.22315	7.14465	7.28546	7.21782	7.27064	6.57115	6.90186	2.18183	1.58001	2.55177	1.42993	1.07018	1.82515	0.772851	0.670759	1.16781	-0.000211	-0.008193	1.28774	0.053921	0.82927	0.320397	0.431131	-0.016938	0.678714	-0.71893	0.158511	-0.847411	0.431342	-0.008745	-0.609027
13384720	AT1G67855	2.73019	2.92067	2.87564	2.8434	3.34153	3.38701	3.55118	3.5417	2.68965	2.93421	3.39927	3.64343	3.10054	3.02417	2.92555	3.28981	3.2346	3.42045	3.14018	3.16699	3.2704	3.05695	3.43571	4.02483	0.370352	0.103502	0.049914	0.446406	-0.106937	0.033438	0.820988	0.621028	-0.185988	0.090813	0.057732	0.25642	0.039641	0.142822	0.344848	-0.232854	0.201118	0.604385	-0.781347	-0.478206	0.530836	-0.323667	0.143386	0.347965
13384951	AT1G68526	4.55873	3.86781	4.64579	4.36024	5.08269	2.6999	5.19563	4.31802	3.61631	4.03478	4.75012	3.46071	4.94283	4.97413	5.2962	6.47448	4.79439	4.00521	4.48635	5.21968	4.18098	5.62085	4.78822	3.78518	0.384099	1.10632	0.650413	2.11424	-0.288302	1.30531	0.636897	0.450206	-1.02948	-0.325458	-0.332571	0.760809	-0.45648	0.245543	-1.11521	-0.853626	-0.006164	-0.22003	-1.09338	-0.204663	-0.085738	-0.528168	0.326407	-0.980839
13385132	AT1G68907	5.10089	5.14397	5.09555	4.68799	5.64132	4.44317	4.35052	6.39194	3.92701	4.75279	4.43604	5.88403	5.559	4.99495	5.28145	3.65817	5.51053	5.00052	6.15307	4.08521	4.65495	3.55954	5.17407	4.77289	0.458106	-0.149021	0.185898	-1.02982	-0.13079	0.557352	-0.750376	1.24797	-1.16854	0.064803	-1.20528	1.44086	0.594073	-0.909737	-0.626505	-0.098626	-0.336465	-0.227633	1.34445	-2.15771	0.542036	-0.163429	0.868814	-1.6685
13385364	AT1G69480	3.63887	4.11407	4.57917	3.64021	5.13571	6.51747	4.23655	4.31829	4.44447	4.29923	5.98111	7.40721	5.07646	5.24026	5.52873	5.13502	5.47826	6.42553	5.29539	5.49859	5.37173	5.09632	5.51948	7.35826	1.43758	1.1262	0.949568	1.49481	0.342546	-0.091941	0.597673	0.204221	-0.134692	0.659018	0.845403	0.889734	0.218932	0.258326	-0.157008	-0.038696	0.041218	0.932724	-0.378741	0.054105	-0.022316	-0.697714	-0.804185	0.04299
13385378	AT1G69485	5.37357	5.46483	4.81158	5.31427	5.19402	6.00298	5.98784	5.64296	5.19248	5.42814	5.19737	5.29643	6.68966	6.55626	6.09665	5.91942	6.62592	6.47303	6.93679	6.65804	6.14954	6.24503	6.35563	6.60226	1.31609	1.09143	1.28508	0.605148	1.43191	0.470046	0.61427	0.178125	0.3809	0.113864	0.003351	-0.706553	0.247124	0.101777	0.052886	0.325612	-0.270294	0.12923	-0.367146	-0.076348	-0.328014	0.211748	-0.273645	0.835783
13385383	AT1G69540	5.31994	5.35527	5.58934	4.90644	5.73707	5.77665	4.74273	5.20268	4.7765	5.28261	5.31067	5.99861	4.03527	4.24919	4.72966	4.38561	3.75366	4.74819	3.60606	4.59692	4.18694	3.97644	3.83342	4.27079	-1.28467	-1.10608	-0.859676	-0.52083	-1.9834	-1.02846	-0.577207	-0.152593	-0.812836	0.376169	-0.426398	0.221956	-0.429215	0.347734	-0.542718	-0.409175	0.079757	-0.477401	0.147992	0.500327	0.270118	-0.785344	0.506155	-0.699357
13385410	AT1G69630	4.22703	4.98912	5.21544	5.36593	5.25837	4.9871	5.14048	5.80337	5.01521	4.83942	5.1541	5.55774	4.92146	4.57226	5.07272	5.45463	4.92146	4.43856	4.95084	4.51363	3.82803	4.33521	5.24946	4.74739	0.694427	-0.416865	-0.142717	0.088701	-0.336913	-0.548543	0.913447	0.814251	-0.200223	-0.526509	-0.104276	0.57064	0.029383	-0.058629	-1.24469	-1.11942	0.327995	0.308824	-0.884064	-0.87288	-1.04446	-0.592908	0.432271	-0.261816
13385444	AT1G69770	7.66051	7.39115	7.51464	7.36111	7.92256	7.82137	7.08506	7.12018	7.69829	7.16697	7.63078	7.67777	7.91102	7.88152	7.75497	8.1276	8.37888	8.56841	7.81172	7.3994	8.14611	8.07735	8.57189	8.36068	0.250506	0.490368	0.240334	0.766496	0.456319	0.747038	-0.575452	-0.270964	0.183649	-0.194133	-0.29178	-0.143596	-0.099295	-0.482118	0.391139	-0.050256	0.193006	-0.207724	0.476157	-0.211154	0.20749	0.143877	0.484786	-0.064128
13385554	AT1G69940	2.06507	2.74947	2.83133	2.60256	2.60678	2.49127	2.73819	2.5086	2.28912	2.58625	2.48819	2.51176	2.84095	2.5086	2.83542	3.25614	2.24544	2.47562	2.63083	2.29547	2.54764	2.41011	2.42	2.50371	0.775884	-0.24087	0.004087	0.653579	-0.36134	-0.015651	0.673118	-0.24087	-0.542212	-0.016308	-0.118591	0.020489	-0.210126	-0.21313	-0.287777	-0.84603	0.174551	0.028088	-0.883244	0.02774	0.254435	-0.829722	0.293142	0.007599
13385857	AT1G70830	7.98078	6.98253	7.52635	7.02492	7.69361	7.65104	7.38333	6.86926	7.37431	7.07595	7.74625	7.39991	6.80514	7.1873	7.17599	7.18657	7.63499	6.99398	7.29858	6.96434	7.02655	7.15016	7.45859	7.14573	-1.17564	0.204765	-0.350362	0.161647	-0.058621	-0.657057	-0.597452	-0.11327	-0.152041	0.05103	0.052642	-0.251126	0.493444	-0.22296	-0.149442	-0.036403	-0.176399	0.151751	1.0909	-0.10969	0.002599	-0.087433	-0.229041	0.402877
13385870	AT1G70850	3.69884	3.91687	4.28235	3.69885	4.10576	4.1779	4.3052	4.43682	3.43449	3.53828	3.8027	4.08082	3.88431	4.0606	4.64612	3.74704	3.75766	3.92868	3.52998	3.89206	3.26205	3.97287	4.26558	3.76999	0.185473	0.143737	0.363774	0.048197	-0.348099	-0.249224	0.606361	0.519951	-0.847858	-0.160562	-0.303057	-0.09708	-0.354329	-0.168547	-1.38407	0.22583	0.507918	-0.158687	-0.96069	-0.688498	-0.536211	0.386392	0.810975	-0.061607
13385968	AT1G71160	3.3323	3.05394	2.83096	2.90513	2.65038	3.2491	2.7037	3.06666	2.82224	3.25447	2.89334	2.95797	3.54305	3.19761	3.75819	3.17094	3.22963	3.12424	3.29016	2.87751	3.07994	3.32096	2.97264	3.15791	0.210747	0.143665	0.927223	0.265808	0.579254	-0.124865	-0.628601	0.012724	-0.008726	0.349333	0.242963	-0.291125	-0.25289	-0.320101	-0.678246	0.150023	-0.256993	0.033672	0.375711	-0.332825	-0.66952	-0.19931	-0.499956	0.324797
13385981	AT1G71200	3.8243	3.21639	3.50773	3.37752	3.66654	3.38607	3.24843	3.9422	3.09866	3.12107	3.35786	3.87441	3.76405	3.42506	3.89566	3.82977	3.74163	3.66102	3.29425	3.46576	3.31426	3.63978	4.34845	3.64941	-0.060247	0.208678	0.387927	0.452247	0.07509	0.274954	-0.575875	0.725819	-0.409077	-0.256448	-0.308681	0.488346	-0.469808	0.040692	-0.581406	-0.189993	0.60682	-0.011608	0.106067	-0.685127	-0.172329	0.066455	0.915501	-0.499954
13386282	AT1G72260	5.84746	4.60378	5.40514	4.54459	4.2577	4.81844	4.59718	4.65004	5.51684	4.22168	5.04165	5.46119	4.18209	4.33506	4.20992	4.58951	4.39699	4.6734	4.63945	3.94118	3.74198	4.09107	4.65405	5.41581	-1.66537	-0.268721	-1.19522	0.044922	0.139295	-0.145041	-1.25028	0.046259	0.111691	-0.322907	0.783953	0.642744	0.457364	-0.393882	-0.467936	-0.498447	0.257054	0.742413	1.70764	-0.440141	-0.579627	-0.17554	-0.526899	0.099669
13386364	AT1G72416	10.4733	9.44897	9.39539	9.08066	8.02926	7.19325	9.86425	9.36264	9.7617	9.00505	7.54369	6.76295	9.98057	9.31571	8.78228	8.56115	7.96781	7.03649	9.7193	9.31766	8.99141	8.62269	7.73985	7.02287	-0.492729	-0.133255	-0.613111	-0.519509	-0.061448	-0.156757	-0.609045	-0.08633	0.366312	-0.075615	-0.485572	-0.430302	-0.261271	0.001944	0.20913	0.061532	-0.227961	-0.013627	0.347774	0.088274	-0.157182	0.137147	0.257611	0.416675
13386528	AT1G72720	3.88632	2.79231	2.87479	3.16368	2.59144	2.38386	2.88738	3.01734	3.49831	3.26507	2.68346	2.4199	2.87856	2.87479	2.5192	2.77138	2.58805	2.47741	2.81634	3.06035	3.46129	2.8326	2.31434	2.35579	-1.00775	0.08248	-0.355584	-0.392297	-0.003385	0.093548	-0.998937	0.225034	0.623521	0.101389	0.092026	0.036035	-0.06222	0.185559	0.942081	0.061213	-0.273706	-0.121625	0.936717	-0.039475	0.31856	-0.040176	-0.365732	-0.15766
13386607	AT1G72980	2.52798	2.92748	2.90803	3.22898	2.8362	2.96555	3.219	2.56639	3.21941	2.94359	2.8105	2.49146	3.27383	3.22379	2.71612	3.10296	2.85982	2.84523	2.64558	2.75013	2.82007	3.00553	3.08327	2.95208	0.745853	0.296311	-0.191911	-0.126014	0.023617	-0.120322	0.69102	-0.361089	0.311379	-0.285382	-0.025697	-0.474083	-0.628252	-0.473661	0.103949	-0.097437	0.223451	0.106858	-1.31927	-0.112572	-0.20743	0.187945	0.249148	0.580941
13386686	AT1G73140	3.75155	3.75611	3.97377	3.52851	4.11706	3.91358	4.4093	3.68721	3.39031	3.88376	3.60056	3.91968	4.12296	4.81418	3.58503	3.95402	4.05571	4.07792	3.87357	4.6794	4.38659	3.71704	4.1817	4.08028	0.371404	1.05806	-0.388745	0.42551	-0.06135	0.164343	0.657743	-0.068908	-0.583466	0.355248	-0.516493	0.006104	-0.249385	-0.134783	0.801564	-0.236981	0.125989	0.002364	-0.907128	-0.065875	1.38503	-0.592229	0.642482	-0.00374
13386713	AT1G73177	8.39535	8.56865	8.57632	8.36168	8.07719	8.18428	7.58067	8.43607	8.35139	8.21481	7.92537	8.0696	7.97042	8.23423	8.48567	8.15712	8.39341	8.2591	7.42842	8.21766	8.81915	7.91068	8.24767	8.41085	-0.424932	-0.33442	-0.090645	-0.204562	0.316218	0.074824	-0.814675	-0.132578	-0.22493	-0.14687	-0.151815	-0.114681	-0.541993	-0.016569	0.333482	-0.246431	-0.145733	0.151751	0.272682	0.116009	0.558412	-0.099561	0.006082	0.266432
13386799	AT1G73300	3.01419	2.24755	2.41901	2.64258	2.40291	2.14789	2.10295	2.36738	2.81447	2.34722	2.46569	2.35536	2.94377	2.61606	2.6315	2.28914	2.14789	2.64258	2.85412	2.97553	2.78758	2.6315	2.71393	2.93632	-0.070414	0.368506	0.212487	-0.35344	-0.255026	0.494698	-0.911242	0.119827	0.395455	-0.295367	0.062782	0.207474	-0.089653	0.359472	0.156084	0.342358	0.566044	0.293736	0.821589	0.239645	-0.239371	0.637725	0.503262	0.086262
13386830	AT1G73330	7.37574	7.53286	7.14873	7.2039	7.93325	7.67971	6.78694	6.93626	7.74563	6.6646	7.56072	7.47653	6.31084	7.37633	6.78412	5.57631	7.3252	7.94362	6.31413	6.93621	6.6075	5.84555	7.31222	7.47427	-1.0649	-0.156532	-0.364606	-1.62759	-0.608055	0.263907	-0.588797	-0.596598	0.596896	-0.539298	-0.372528	-0.203174	0.003284	-0.440119	-0.176622	0.269243	-0.012974	-0.469343	0.592081	0.156479	-0.773518	0.808541	0.359554	-0.266169
13388370	AT1G77030	4.52954	5.09531	5.23043	4.51433	4.91505	5.44063	5.52325	5.55529	5.47382	4.54553	5.30177	4.88993	5.34514	5.33472	5.81263	5.86871	5.69639	5.8702	5.46014	5.79498	5.01941	5.25845	5.62615	5.55524	0.815603	0.239413	0.582206	1.35439	0.781339	0.429572	0.993714	0.45998	0.243399	0.031201	0.386727	-0.550702	0.115002	0.460254	-0.793226	-0.610267	-0.07023	-0.314962	-0.878712	0.000274	-1.03662	-0.641468	-0.456957	0.23574
13388372	AT1G77030	8.89852	9.17411	9.00014	9.07886	8.20382	8.60929	8.80767	9.16106	9.32623	9.20943	8.54352	8.68058	9.1831	9.28749	9.31984	9.10293	8.47752	9.03118	9.04613	9.26888	9.12412	8.77589	8.74232	8.97646	0.28458	0.113377	0.319706	0.024071	0.273698	0.421892	-0.090845	-0.013047	0.326096	0.130574	0.339697	0.071286	-0.136967	-0.018602	-0.195718	-0.327043	0.264801	-0.054718	-0.046122	-0.005555	-0.521814	-0.457617	-0.074896	-0.126004
13388426	AT1G77150	4.76487	4.6712	5.83721	4.62238	4.59278	4.3926	4.08569	4.15243	4.09171	4.76781	4.59508	4.47878	5.1906	4.68325	4.62238	4.39434	4.58904	4.57962	4.87617	4.79106	4.42819	4.83918	5.02192	4.23084	0.425738	0.012054	-1.21483	-0.228047	-0.003742	0.187028	-0.679177	-0.518767	-1.7455	0.145427	0.002294	0.086187	-0.314436	0.107807	-0.194198	0.444843	0.43288	-0.348783	0.364741	0.626574	1.55131	0.299416	0.430586	-0.43497
13388459	AT1G77240	7.7229	7.46709	7.80837	7.67256	7.19795	7.07277	7.12667	7.77218	7.75942	7.50094	7.44044	7.34683	7.52168	7.94707	7.40493	7.9173	7.49718	7.59495	7.59403	7.91888	8.42254	7.49699	7.61203	7.79663	-0.201224	0.479979	-0.403449	0.244744	0.299227	0.522181	-0.596229	0.305091	-0.048953	-0.171615	0.242487	0.274057	0.072351	-0.028187	1.01761	-0.420305	0.114847	0.201676	0.66858	-0.333278	1.06657	-0.24869	-0.12764	-0.072381
13388623	AT1G77030	4.52954	5.09531	5.23043	4.51433	4.91505	5.44063	5.52325	5.55529	5.47382	4.54553	5.30177	4.88993	5.34514	5.33472	5.81263	5.86871	5.69639	5.8702	5.46014	5.79498	5.01941	5.25845	5.62615	5.55524	0.815603	0.239413	0.582206	1.35439	0.781339	0.429572	0.993714	0.45998	0.243399	0.031201	0.386727	-0.550702	0.115002	0.460254	-0.793226	-0.610267	-0.07023	-0.314962	-0.878712	0.000274	-1.03662	-0.641468	-0.456957	0.23574
13388704	AT1G77655	2.92069	3.48162	3.40529	4.26169	4.15108	3.78071	3.7894	3.64937	3.32047	3.37933	3.47647	3.68158	4.201	3.57296	3.13442	2.78467	3.62919	3.4324	4.2281	3.42286	3.38019	3.39116	3.77989	3.70369	1.2803	0.091348	-0.27087	-1.47702	-0.52189	-0.34831	0.868702	0.167756	-0.084816	-0.882361	-0.67461	-0.099135	0.0271	-0.1501	0.245775	0.606493	0.150702	0.271287	-0.841602	-0.317856	0.330591	1.48885	0.825312	0.370422
13388748	AT1G77760	9.35557	7.08848	6.90588	9.13492	8.94553	9.37215	8.59149	7.07298	7.38985	9.26349	9.12065	10.0653	9.06698	7.26083	7.47704	9.92272	9.18451	9.91341	8.43759	7.35576	8.04056	9.72201	9.28813	10.1263	-0.288592	0.17235	0.571158	0.787803	0.238978	0.541265	-0.764084	-0.0155	0.483972	0.128568	0.175122	0.693104	-0.629387	0.094931	0.563522	-0.200709	0.103617	0.212879	0.134697	0.110431	0.07955	-0.329277	-0.071505	-0.480225
13388761	AT1G77780	3.17566	2.58071	2.50739	2.63998	2.61025	2.61025	2.55593	2.83305	2.43263	2.61629	2.53909	2.61025	2.67516	2.75222	2.6195	2.5839	2.59867	2.60217	2.61312	2.53909	2.61025	2.74479	2.80648	2.50432	-0.500504	0.171514	0.112117	-0.056084	-0.01159	-0.008083	-0.619728	0.25235	-0.07476	-0.023691	-0.071166	0	-0.062037	-0.21313	-0.009249	0.16089	0.207812	-0.097856	0.557691	-0.46548	0.065511	0.184581	0.278978	-0.097856
13388813	AT1G77960	4.40118	4.97456	4.62596	5.00565	7.65972	7.86815	5.37332	4.86789	4.50385	4.91199	7.27902	6.61033	4.17031	4.57161	3.45336	4.42709	3.92353	4.19429	4.48773	3.71422	4.12429	4.3794	4.63373	4.63146	-0.230863	-0.402951	-1.1726	-0.578565	-3.73619	-3.67386	0.972139	-0.106677	-0.12211	-0.093658	-0.380699	-1.25782	0.317412	-0.857395	0.670933	-0.047685	0.7102	0.437171	-0.654727	-0.750718	0.793043	0.045973	1.0909	1.695
13388951	AT1G78400	5.69408	4.99147	4.97269	5.06703	5.2306	5.02429	4.88145	4.91159	4.65941	5.05685	5.0671	5.11687	5.08493	5.34014	4.87341	5.05576	5.01792	5.04968	5.33312	5.16658	5.14671	5.15174	5.26807	5.54628	-0.609154	0.348671	-0.099282	-0.011278	-0.212678	0.025394	-0.812633	-0.079882	-0.313281	-0.010184	-0.163505	0.09258	0.248192	-0.17356	0.2733	0.095983	0.250149	0.496598	1.06082	-0.093678	0.586581	0.106167	0.413654	0.404018
13388984	AT1G78520	4.57661	5.11667	5.19	4.66773	5.09389	5.34075	5.80109	4.95622	5.15812	4.89556	5.2333	4.97419	4.8542	5.3123	4.85123	5.30836	5.75821	5.42875	5.38494	5.03217	5.31679	4.94048	5.79	4.96711	0.277589	0.195633	-0.338767	0.64063	0.664316	0.088004	1.22448	-0.160448	-0.031877	0.227833	0.139407	-0.366559	0.530739	-0.28013	0.465556	-0.367875	0.031789	-0.461644	-0.693743	-0.119682	0.497433	-0.595708	-0.107618	-0.095085
13389233	AT1G78955	5.0277	4.82853	5.11983	5.41076	5.30224	5.11812	5.62477	4.81417	5.07535	4.76638	5.08667	5.31764	5.94879	6.46021	6.39194	6.271	6.79248	6.25387	6.4277	6.06478	6.15653	5.89558	6.65243	5.91467	0.921083	1.63168	1.27211	0.86024	1.49024	1.13575	0.597066	-0.014355	-0.044485	-0.644387	-0.215569	0.199525	0.47891	-0.395427	-0.235409	-0.375424	-0.140052	-0.339197	-0.118156	-0.381072	-0.190924	0.268963	0.075517	-0.538722
13389500	AT1G79410	4.45894	3.77535	5.52543	7.08395	6.03371	6.46108	5.24206	4.74385	5.58454	7.22727	6.21348	5.91585	5.55059	4.0102	5.46642	6.81157	5.68446	6.00478	5.95019	4.89438	5.36464	7.22882	5.45926	5.71003	1.09166	0.234856	-0.05901	-0.272383	-0.349252	-0.456295	0.783122	0.968506	0.05911	0.143316	0.179771	-0.545224	0.3996	0.88418	-0.101783	0.41725	-0.225201	-0.294749	-0.383522	-0.084326	-0.160893	0.273934	-0.404972	0.250475
13389933	AT1G80060	5.83232	5.60181	5.88591	5.81016	6.21615	5.71127	6.52943	5.7971	6.03343	5.72214	6.04287	5.67803	6.5153	6.46211	5.90825	6.52632	6.48981	6.34708	6.04436	6.24759	6.58917	5.84622	6.14395	5.78113	0.682978	0.860305	0.022345	0.716163	0.273665	0.635814	0.697108	0.195289	0.14752	-0.088015	-0.173278	-0.033239	-0.470932	-0.214523	0.680915	-0.680098	-0.34586	-0.565955	-1.16804	-0.409812	0.533395	-0.592083	-0.172582	-0.532716
13389995	AT1G80280	7.10862	6.81947	8.07495	8.43983	6.04213	6.06529	6.48111	6.4521	7.46546	8.28253	5.80151	5.41196	6.90705	6.90921	8.37011	8.48391	6.76475	6.523	6.57449	6.83682	8.02625	8.47116	6.3669	6.39931	-0.201566	0.089742	0.295159	0.044074	0.722618	0.457706	-0.627511	-0.367368	-0.609485	-0.157299	-0.240623	-0.653331	-0.332566	-0.072393	-0.343852	-0.012749	-0.397853	-0.123684	0.294945	0.294975	0.265633	0.14455	-0.15723	0.529647
13390215	AT1G80710	6.92792	5.55814	5.78793	6.54233	6.11047	6.27635	6.09205	5.95171	5.40536	5.87731	6.32106	6.17108	6.44416	6.03799	5.97907	6.82879	6.21879	6.21833	6.21214	5.56163	6.31427	6.21786	6.20096	6.52481	-0.483758	0.479847	0.191143	0.286463	0.108322	-0.058027	-0.835866	0.393562	-0.382572	-0.665022	0.210591	-0.105273	-0.232021	-0.476367	0.335196	-0.610926	-0.017831	0.306481	0.603845	-0.869929	0.717768	0.054096	-0.228422	0.411754
13390625	AT2G01905	4.95826	4.20541	4.29411	4.43049	4.75487	4.5489	4.36998	4.30757	3.94516	4.63492	4.15027	4.16991	4.80575	4.26775	5.05185	5.04784	4.67095	4.19261	4.39226	4.38956	4.45627	4.62273	4.83064	4.23194	-0.15251	0.062338	0.757742	0.617355	-0.083919	-0.35629	-0.588274	0.102157	-0.348945	0.20443	-0.604592	-0.378988	-0.413483	0.121808	-0.595578	-0.425112	0.159697	0.039328	0.174791	0.019651	-0.246633	-0.629542	0.764289	0.418316
13390690	AT2G02020	8.90293	8.22154	7.95452	8.78179	8.5488	7.20236	8.06374	8.00487	7.7456	8.95362	7.9626	6.69861	8.67309	8.03008	7.07972	7.87157	8.25195	7.67659	8.24814	7.35756	7.94284	8.16276	8.01169	7.67206	-0.22984	-0.191455	-0.874798	-0.910215	-0.296846	0.474225	-0.839186	-0.216664	-0.208923	0.171833	-0.586194	-0.503751	-0.424949	-0.672527	0.863118	0.291187	-0.240262	-0.00453	0.414237	-0.455863	1.07204	0.119354	0.345932	0.499221
13390755	AT2G02120	3.02915	3.38623	3.36424	3.92587	3.67323	3.85161	3.69344	3.82717	4.10402	3.68598	3.60864	3.54548	3.67952	3.94128	3.23204	4.64105	3.77917	3.23377	4.10302	4.0866	4.29856	3.71976	3.61447	3.5824	0.650373	0.555048	-0.132199	0.715181	0.105943	-0.617841	0.664291	0.440933	0.739779	-0.239894	-0.064587	-0.30613	0.423502	0.145319	1.06652	-0.921292	-0.1647	0.348633	-0.240789	-0.295614	0.32674	-0.681398	-0.100113	0.654763
13390794	AT2G02380	5.63198	6.09165	6.31306	5.85998	6.11785	5.81301	4.64776	5.83525	5.36596	5.43141	5.75795	5.34506	5.55704	5.99667	5.66947	5.90911	6.04878	5.94052	5.60128	5.77623	5.10461	5.73341	5.95378	5.51911	-0.074942	-0.094978	-0.643588	0.049132	-0.069077	0.127514	-0.984218	-0.256403	-0.947103	-0.428569	-0.359907	-0.467952	0.044235	-0.220446	-0.564859	-0.175704	-0.094999	-0.421416	1.02845	0.035957	0.382244	0.252865	0.264908	0.046536
13390934	AT2G02640	3.0257	2.86585	2.60194	2.38008	2.6515	2.8242	2.43509	2.79773	2.14255	2.52801	2.73018	3.48497	2.43872	2.77735	2.43511	2.6716	2.26102	2.15668	2.55298	2.30128	2.55079	2.06421	2.18443	2.54046	-0.586975	-0.088496	-0.166835	0.291522	-0.390476	-0.667514	-0.590614	-0.068111	-0.459391	0.147929	0.078688	0.660768	0.114252	-0.476072	0.115683	-0.607388	-0.076588	0.383772	0.704866	-0.407961	0.575074	-0.755317	-0.155276	-0.276996
13390943	AT2G02690	3.46238	3.80639	3.43906	3.27651	3.46256	3.48844	4.20468	3.75702	3.12022	3.85615	3.44631	3.21433	3.62507	3.38706	3.9938	3.35425	3.04342	3.8596	3.37322	3.55996	2.98613	3.62028	3.43686	3.78851	0.162692	-0.419325	0.554739	0.077743	-0.419142	0.371162	0.7423	-0.049363	-0.318845	0.579644	-0.016252	-0.274111	-0.251851	0.172895	-1.00768	0.266027	0.393436	-0.071092	-0.994151	0.222258	-0.688832	-0.313617	0.409688	0.203019
13391146	AT2G03290	3.01421	4.15597	4.16909	4.04919	3.57924	3.86375	4.62852	3.38666	3.20053	4.17896	3.61368	4.06878	3.39507	3.32833	4.13034	3.52511	3.38555	3.43495	3.89008	3.46941	3.50549	3.64543	3.34005	3.81245	0.380859	-0.827643	-0.038755	-0.524082	-0.193691	-0.4288	1.6143	-0.769312	-0.968563	0.12977	0.034434	0.205029	0.495005	0.141081	-0.624849	0.120325	-0.045501	0.377504	-1.1193	0.910393	0.343714	-0.009445	-0.079935	0.172475
13391247	AT2G03590	5.67714	5.16395	4.69622	4.98993	5.52145	6.6208	5.04243	5.76732	5.19312	4.79209	6.28686	5.68718	7.48505	6.33641	6.77241	7.06039	7.8553	7.05445	7.17571	6.96867	6.51194	6.92065	7.23849	6.32082	1.80791	1.17246	2.07619	2.07046	2.33384	0.433646	-0.634708	0.603373	0.496894	-0.197842	0.765406	-0.933619	-0.309338	0.632263	-0.260474	-0.139742	-0.616811	-0.733632	0.32537	0.02889	-0.757368	0.0581	-1.38222	0.199987
13391334	AT3G50840	6.05403	7.05934	6.81838	6.43728	7.07378	6.75958	6.68326	6.8723	5.85088	6.41953	6.78615	6.81047	6.60494	5.86453	6.40697	6.15657	6.27647	6.00258	6.00079	6.10011	6.58063	5.82997	6.49336	6.00886	0.55091	-1.19481	-0.411405	-0.280711	-0.797311	-0.757003	0.629236	-0.187033	-0.967498	-0.017749	-0.287637	0.05089	-0.604148	0.235575	0.173656	-0.326603	0.216888	0.006283	-1.23338	0.422608	1.14115	-0.308854	0.504525	-0.044607
13391392	AT2G03913	4.23545	5.09281	3.94814	5.63111	4.57145	6.59363	3.05178	5.48854	3.65443	5.47353	3.93891	5.13429	3.86978	4.09764	3.46785	4.21252	2.83247	4.23925	3.46504	3.07637	3.16745	2.91694	6.44025	3.12242	-0.365668	-0.995169	-0.480289	-1.41858	-1.73898	-2.35438	-1.18367	0.395734	-0.293714	-0.15758	-0.632535	-1.45934	-0.404745	-1.02127	-0.300408	-1.29558	3.60778	-1.11683	0.778923	-1.41701	-0.006694	-1.138	4.24032	0.34251
13391402	AT2G03933	4.00214	2.57259	3.4915	2.58178	2.81436	2.95004	3.42062	2.96872	2.35723	3.34596	2.5799	2.92057	2.90422	3.10864	2.96928	3.5199	2.5244	2.78854	3.30548	3.09067	2.61864	3.1398	2.46337	2.96936	-1.09792	0.536043	-0.522221	0.938122	-0.289964	-0.161506	-0.581514	0.396123	-1.13426	0.764185	-0.234461	-0.029474	0.401261	-0.017969	-0.350637	-0.380096	-0.061032	0.180826	0.982775	-0.414092	0.783626	-1.14428	0.173429	0.2103
13391479	AT2G04220	3.07877	3.27792	3.25939	3.14494	3.00774	3.18802	3.89632	3.7007	3.12362	3.30766	2.84787	3.32355	3.14494	3.0331	3.42376	3.04427	2.97848	3.42512	2.98759	3.12449	3.20307	3.21845	3.13859	3.14494	0.066172	-0.244819	0.164372	-0.100672	-0.029263	0.237099	0.817549	0.422779	-0.135771	0.16272	-0.159875	0.135528	-0.15735	0.091389	-0.220692	0.17418	0.160115	-0.280179	-0.974899	-0.33139	-0.084921	0.01146	0.31999	-0.415707
13391664	AT2G04680	5.14545	4.68769	5.04626	4.54194	3.92753	4.71175	3.89671	4.40662	3.65337	4.75025	4.45265	5.08533	3.68265	3.77181	3.49413	3.67335	3.60006	3.66969	3.63909	4.16774	3.99577	3.63163	3.84908	3.67393	-1.4628	-0.915882	-1.55212	-0.868596	-0.327476	-1.04206	-1.24873	-0.281071	-1.39289	0.208305	0.525119	0.373579	-0.043559	0.395935	0.501631	-0.041719	0.249025	0.004237	1.20517	0.677006	1.89452	-0.250024	-0.276094	-0.369342
13391708	AT2G04810	4.06214	4.90684	5.46749	4.68982	4.15103	4.99079	4.65525	4.92766	3.90365	4.48034	4.36534	5.11311	4.57933	4.19545	4.17531	4.24208	3.95913	3.92163	4.23167	4.30417	3.67286	4.31009	4.36534	3.98315	0.517189	-0.71139	-1.29218	-0.447738	-0.191904	-1.06916	0.593109	0.020818	-1.56384	-0.209485	0.214312	0.122327	-0.347661	0.108716	-0.502444	0.068012	0.406216	0.061518	-0.94077	0.087898	1.06139	0.277497	0.191904	-0.060809
13391747	AT2G05050	5.25831	5.05019	5.11826	4.8116	3.88864	4.99247	3.77229	5.35255	3.74947	4.3687	4.17981	4.37046	4.36693	5.34228	4.70839	4.79581	3.94924	4.55552	3.82988	4.41863	3.48901	3.95085	5.36412	4.24329	-0.891388	0.29209	-0.409871	-0.015787	0.060601	-0.436941	-1.48603	0.302361	-1.36879	-0.442898	0.291173	-0.622009	-0.53705	-0.923643	-1.21938	-0.844964	1.41488	-0.312235	0.948976	-1.226	0.149413	-0.402066	1.12371	0.309774
13391800	AT2G05335	3.14813	3.19075	3.22634	3.55132	3.23559	4.00849	4.39785	3.90011	3.07708	3.59323	3.3411	3.456	3.24017	3.30846	3.45228	3.02467	3.3837	3.42006	3.01094	3.03181	3.37622	3.46475	3.23767	3.65858	0.092045	0.11771	0.225938	-0.526649	0.148112	-0.588433	1.24972	0.709352	-0.149262	0.041903	0.105506	-0.552491	-0.22923	-0.276657	-0.076066	0.440079	-0.146027	0.238523	-1.47895	-0.986009	0.073196	0.398176	-0.251533	0.791014
13391844	AT2G05440	9.10731	8.81047	9.0244	8.11751	8.3407	8.46611	8.53375	8.21331	8.4487	7.89292	8.3941	9.39629	6.89616	7.68892	7.50009	5.54153	6.54656	6.74934	6.97928	6.85405	5.90623	6.56253	6.56905	6.94005	-2.21115	-1.12156	-1.52432	-2.57597	-1.79414	-1.71676	-0.573558	-0.597159	-0.575706	-0.224585	0.05341	0.930185	0.083127	-0.83487	-1.59386	1.02099	0.022492	0.190708	0.656685	-0.237711	-1.01815	1.24558	-0.030918	-0.739477
13391988	AT2G05915	5.59101	6.16898	7.15019	7.12217	6.01065	6.44281	6.26406	7.17642	6.577	7.67269	5.81553	6.47502	7.12034	5.48878	6.07563	7.52895	5.74632	7.04257	7.24242	7.15374	7.2593	7.3072	6.66845	6.04507	1.52934	-0.680199	-1.07456	0.40678	-0.264326	0.599759	0.673057	1.00744	-0.573188	0.550519	-0.195116	0.032213	0.122072	1.66496	1.18367	-0.221751	0.922125	-0.997491	-0.550985	0.65752	1.75686	-0.77227	1.11724	-1.0297
13392009	AT2G06002	5.24551	6.0752	6.39063	5.33277	6.39765	5.90287	6.01987	6.14007	6.61068	4.91079	5.71696	5.28037	4.91577	4.01306	4.38468	4.40511	4.90825	3.83869	4.83731	4.27197	5.38688	5.21529	4.15032	4.41418	-0.329742	-2.06215	-2.00595	-0.927669	-1.4894	-2.06419	0.774358	0.064867	0.220052	-0.421985	-0.68069	-0.622504	-0.078458	0.258911	1.0022	0.810184	-0.757926	0.575497	-0.852816	0.194044	0.782152	1.23217	-0.077236	1.198
13392085	AT2G06845	2.70765	3.27537	3.01972	3.06202	3.0725	3.4486	3.42788	3.71632	2.96348	3.87055	3.52975	3.71171	3.64111	4.12324	3.85093	3.30697	3.42878	3.36838	3.78921	3.78105	3.65248	3.91559	3.05879	3.45865	0.933457	0.847864	0.831205	0.24496	0.356276	-0.08022	0.720221	0.44095	-0.05624	0.808537	0.457251	0.263112	0.148094	-0.342182	-0.198443	0.608614	-0.369985	0.090268	-0.572127	-0.783132	-0.142203	-0.199923	-0.827236	-0.172844
13392125	AT2G07040	3.09834	3.23748	3.3309	3.50014	3.6307	3.41031	3.69677	3.62718	3.55932	3.35692	3.48777	3.43337	3.35328	3.52098	3.61469	3.31438	3.66019	3.32087	3.29818	3.68548	3.8615	3.28448	3.32276	4.08062	0.254938	0.2835	0.283791	-0.185763	0.029488	-0.089436	0.59843	0.389709	0.228419	-0.14322	-0.142936	0.023064	-0.055101	0.1645	0.246812	-0.029901	-0.337431	0.759751	-0.653531	-0.225209	0.018393	0.113319	-0.194495	0.736687
13392216	BT010728	4.14665	4.67563	4.63998	3.97099	5.56228	3.97355	4.74305	3.51577	4.51134	4.27033	4.26328	4.94033	4.28682	3.88404	4.54837	4.27094	4.65778	5.33548	4.42635	4.13991	4.33498	3.63721	4.72713	4.48875	0.140167	-0.79159	-0.09161	0.299943	-0.904495	1.36193	0.596396	-1.15986	-0.128644	0.299334	-1.29899	0.966783	0.139529	0.255869	-0.213385	-0.633722	0.069348	-0.846728	-0.456867	1.41573	-0.084741	-0.933056	1.36834	-1.81351
13392500	AT2G10965	3.26749	3.69808	3.58762	3.51832	3.77205	3.38671	3.92224	3.28794	3.47374	3.39844	3.29451	3.54779	3.47758	3.41641	3.77138	3.72356	3.37011	3.29929	3.49091	3.64745	3.85541	3.6515	3.57908	3.73392	0.210088	-0.281667	0.183765	0.205235	-0.401947	-0.087411	0.654752	-0.410142	-0.113878	-0.11988	-0.477541	0.161085	0.013329	0.231042	0.084029	-0.072062	0.208968	0.434626	-0.641423	0.641184	0.197907	0.047818	0.686509	0.273541
13392523	AT2G11015	3.58091	3.06779	3.47382	3.53915	3.16299	3.49197	2.9968	3.51098	3.57809	3.38145	3.74846	3.21125	3.96566	4.06992	3.48754	3.12783	3.54211	3.74953	3.34842	4.15577	3.67762	3.78884	3.57938	3.93278	0.384752	1.00213	0.013722	-0.411321	0.379116	0.257558	-0.584106	0.443189	0.104276	-0.157704	0.585469	-0.280721	-0.61724	0.085853	0.190084	0.661008	0.037269	0.183251	-0.033134	-0.357336	0.085808	0.818712	-0.5482	0.463972
13392531	AT2G11405	3.95202	4.09639	4.35447	3.49005	4.08097	4.9976	3.13787	4.37312	3.83758	3.69112	4.54155	4.53196	2.93224	2.63957	2.59185	2.88328	2.95563	2.63417	2.73867	2.58109	2.89422	3.01936	2.74097	2.73336	-1.01978	-1.45682	-1.76262	-0.606764	-1.12534	-2.36342	-0.81415	0.276728	-0.516894	0.201071	0.460578	-0.465634	-0.193571	-0.058475	0.30237	0.136073	-0.214669	0.099181	0.620579	-0.335203	0.819264	-0.064998	-0.675247	0.564815
13392804	AT2G13950	4.68728	5.05757	4.57303	5.42428	5.06848	5.03367	5.36049	5.20625	4.77819	4.75169	4.51016	4.62646	5.34441	4.93431	5.53338	5.16628	4.78626	5.39934	5.47432	5.08327	5.8341	5.01948	4.58619	4.95983	0.657133	-0.123267	0.960343	-0.258007	-0.282221	0.365675	0.67321	0.148672	0.205157	-0.672592	-0.558322	-0.407203	0.129912	0.148965	0.300727	-0.146798	-0.200068	-0.439508	-0.543298	0.000293	0.09557	0.525794	0.358254	-0.032305
13392895	AT2G14270	3.18095	3.19828	3.36326	3.33611	3.4032	2.92938	2.40946	3.72485	2.84969	3.0055	2.89951	3.57687	3.09471	3.58201	3.64645	5.37665	2.92003	3.63046	3.18926	3.28456	3.37867	3.18788	3.74249	3.52565	-0.086239	0.383727	0.283193	2.04054	-0.483164	0.70108	-0.771484	0.52657	-0.513564	-0.33061	-0.503687	0.647492	0.094553	-0.297444	-0.267774	-2.18877	0.822456	-0.104813	0.866037	-0.824014	0.24579	-1.85816	1.32614	-0.752305
13393607	AT2G17043	4.92275	5.02998	5.21633	4.34732	4.68015	5.34992	3.75055	5.7245	4.24981	5.06554	4.00784	4.67227	4.65066	4.05162	3.96976	3.53028	3.6973	3.62359	4.40303	4.20472	4.03613	4.15551	4.06078	3.82549	-0.27209	-0.978355	-1.24657	-0.817041	-0.982848	-1.72633	-1.1722	0.694519	-0.966514	0.718217	-0.67231	-0.677644	-0.247633	0.153102	0.066369	0.625231	0.363483	0.201904	0.92457	-0.541417	1.03288	-0.092986	1.03579	0.879548
13393856	AT2G17620	4.31543	3.73393	3.52881	4.05509	4.22948	4.06519	3.50665	4.22573	3.80112	4.08877	3.56492	3.62448	4.76109	4.5871	4.79313	5.05756	4.87193	4.96482	4.75736	4.38956	4.10496	4.5692	4.45863	4.66033	0.445655	0.853162	1.26432	1.00247	0.642453	0.899629	-0.808787	0.491798	0.272313	0.033687	-0.664562	-0.440705	-0.003732	-0.197538	-0.688166	-0.488356	-0.4133	-0.304491	0.805055	-0.689336	-0.960479	-0.522043	0.251262	0.136214
13393990	AT1G06480	3.33524	3.09723	4.32096	3.89791	4.90126	3.46694	4.02129	4.16561	3.15078	3.36823	3.33156	4.65867	3.67562	3.82429	4.21585	4.00814	4.28237	3.84665	4.20483	3.32793	3.56066	3.63762	4.17625	4.41249	0.340381	0.727059	-0.105113	0.110233	-0.618888	0.37971	0.686055	1.06838	-1.17018	-0.529685	-1.5697	1.19173	0.529213	-0.496368	-0.655184	-0.370523	-0.106123	0.565836	-0.156842	-1.56475	0.514992	0.159162	1.46358	-0.625899
13394136	AT2G18260	4.68037	5.38166	5.27192	4.36427	5.16751	4.37548	5.32005	5.52727	4.46908	4.38999	4.40905	4.30328	4.18571	4.16051	4.36567	3.67047	4.2959	4.31435	3.90278	3.86397	4.26187	4.03182	3.9826	3.7923	-0.494659	-1.22116	-0.90625	-0.693804	-0.871606	-0.061128	0.63968	0.145602	-0.802836	0.025716	-0.758458	-0.072204	-0.282932	-0.296538	-0.103792	0.361357	-0.313295	-0.522049	-0.922612	-0.44214	0.699044	0.335641	0.445163	-0.449845
13394148	AT2G18320	3.59433	2.90122	2.62921	3.5634	3.60196	3.02942	2.96893	2.96024	2.83111	2.90497	2.99721	3.08472	3.24529	3.35401	3.37095	3.61565	3.29643	3.09697	3.33367	3.41507	3.44838	3.91638	3.42042	3.02027	-0.349043	0.452793	0.741738	0.052253	-0.305526	0.06755	-0.6254	0.059019	0.201896	-0.658429	-0.604749	0.0553	0.088378	0.061056	0.077434	0.300727	0.123984	-0.076702	0.713778	0.002037	-0.124462	0.959156	0.728733	-0.132002
13394214	AT2G18530	3.38466	3.33524	3.14792	3.02357	2.93116	3.50344	2.7387	4.22406	3.25113	3.14058	2.99109	3.10853	3.69558	3.04554	3.53505	3.13663	3.13579	3.10139	3.24939	2.85402	2.83529	3.00749	3.72288	3.28831	0.310919	-0.289702	0.387129	0.113057	0.204636	-0.402051	-0.645959	0.888818	0.10321	0.117006	0.059937	-0.394908	-0.446183	-0.191518	-0.699758	-0.129139	0.587084	0.186923	0.199776	-1.08034	-0.802968	-0.246145	0.527147	0.581831
13394399	AT2G18920	4.1505	4.32974	4.38763	4.53851	4.36437	4.44854	4.94245	4.37041	4.37076	4.48649	4.19166	4.1623	4.63298	4.37751	4.5643	4.63292	4.81597	4.57768	4.67273	4.32853	4.45329	4.55518	4.43588	4.46289	0.482486	0.047766	0.176668	0.094413	0.451597	0.129138	0.79195	0.040672	-0.016869	-0.05202	-0.172714	-0.286244	0.039744	-0.048972	-0.111011	-0.077741	-0.380094	-0.114792	-0.752206	-0.089644	-0.094142	-0.025721	-0.20738	0.171452
13394405	AT2G18938	3.79464	4.24482	4.59214	4.38389	4.41169	3.89954	4.82367	4.70608	5.43371	4.43633	5.03087	4.24067	5.1241	5.38019	6.00334	5.31481	5.03385	4.7718	5.39556	6.26466	6.74801	4.6566	5.56681	4.73051	1.32946	1.13537	1.4112	0.930922	0.622164	0.872251	1.02903	0.461257	0.84157	0.052443	0.619182	0.341127	0.271463	0.884462	0.74467	-0.658204	0.532959	-0.041286	-0.757563	0.423205	-0.0969	-0.710647	-0.086223	-0.382413
13394455	AT2G19020	2.33059	3.26212	2.48476	3.32103	2.8942	3.49551	3.40745	2.70718	3.001	3.18025	2.9731	2.86481	3.03236	2.98917	3.48527	3.22469	3.13721	3.60044	3.17508	3.3166	3.47783	3.38843	3.52683	3.08304	0.701768	-0.27295	1.00051	-0.096337	0.243014	0.104931	1.07686	-0.554941	0.516241	-0.140777	0.078907	-0.630697	0.142716	0.327426	-0.007447	0.163742	0.389623	-0.517404	-0.934144	0.882367	-0.523688	0.304519	0.310716	0.113293
13394457	AT2G19030	4.48339	5.30349	4.70652	5.71725	4.74593	5.21861	5.22461	5.42548	5.2012	5.29357	4.90047	5.11249	5.6751	5.02681	5.48801	4.61943	5.20407	5.25353	5.45784	5.39128	5.38565	5.08695	5.28395	5.17715	1.19172	-0.27668	0.781492	-1.09782	0.458144	0.034922	0.741224	0.121985	0.494673	-0.423676	0.15454	-0.106122	-0.217267	0.36447	-0.102364	0.467524	0.079878	-0.076376	-0.958491	0.242485	-0.597037	0.8912	-0.074662	0.029746
13394704	AT2G19610	4.11224	3.82158	3.72034	3.54258	3.81863	3.33277	3.51209	3.47484	3.16509	3.68329	3.44639	3.47279	4.07221	3.96152	3.80552	3.84839	3.71875	4.18938	4.01543	3.60216	4.09685	3.78758	3.35935	4.00486	-0.040029	0.139943	0.085186	0.305805	-0.099877	0.856602	-0.600141	-0.34674	-0.555248	0.140706	-0.372242	0.14001	-0.056776	-0.359363	0.291323	-0.060804	-0.359407	-0.184515	0.543365	-0.012623	0.846571	-0.20151	0.012835	-0.324525
13395066	AT2G20540	6.34186	6.59638	6.53326	6.79082	6.49932	6.36121	5.60627	6.36286	6.42544	6.64127	5.87878	5.91071	6.21585	6.36121	6.602	6.5839	5.90894	6.01809	6.09523	6.42634	6.49479	6.46336	6.27365	6.36622	-0.126004	-0.235174	0.068737	-0.206914	-0.590388	-0.343123	-0.735586	-0.233523	-0.107827	-0.149547	-0.62055	-0.450494	-0.120621	0.065136	-0.107213	-0.120542	0.36471	0.348134	0.614965	0.298659	0.000614	0.029005	0.98526	0.798628
13395165	AT2G20750	5.65898	6.07222	6.06671	5.61216	7.04261	8.12673	4.32746	5.49334	6.02707	5.65812	7.42368	6.55646	5.82447	5.95419	7.41798	6.50563	8.16343	8.02301	5.42015	5.76725	6.52766	6.47764	7.92258	7.31231	0.16549	-0.118026	1.35127	0.893473	1.12082	-0.103718	-1.33153	-0.578877	-0.039633	0.045965	0.381065	-1.57027	-0.404325	-0.186939	-0.890319	-0.027991	-0.240853	-0.710705	0.927203	0.391938	-0.850686	-0.073956	-0.621918	0.859562
13395367	AT2G21220	3.87011	4.86892	4.82794	4.57512	4.88254	4.91231	4.73405	4.80607	5.0318	4.42573	4.64831	4.71052	5.37345	6.63763	6.13823	6.00066	6.403	5.65829	5.24868	6.46327	6.23315	5.58586	6.34368	5.40526	1.50334	1.7687	1.31029	1.42553	1.52046	0.745986	0.863932	-0.062854	0.203863	-0.149398	-0.234223	-0.201791	-0.124767	-0.174358	0.094926	-0.414795	-0.059319	-0.253032	-0.988699	-0.111504	-0.108937	-0.265397	0.174904	-0.051241
13395480	AT2G21420	3.25908	3.91251	3.84395	3.69225	3.59965	3.71397	3.90223	3.5264	3.47682	3.73722	3.85984	4.33409	3.64832	3.41376	3.88801	4.1695	4.13477	3.83141	3.74268	3.63097	3.80554	4.3177	3.94443	4.19736	0.389248	-0.498745	0.044056	0.477247	0.535123	0.117442	0.643155	-0.38611	-0.367127	0.044964	0.260188	0.620121	0.094352	0.217206	-0.082467	0.148201	-0.190343	0.365953	-0.548803	0.603316	0.28466	0.103237	-0.450531	-0.254168
13395606	AT2G21720	4.56611	4.42329	5.07988	4.59006	4.90107	4.99369	3.9215	5.01718	4.36218	4.48382	3.90253	4.93482	4.50898	4.93701	4.50618	4.49966	4.49966	4.49966	4.82628	4.29314	4.17189	4.47845	4.99035	4.44765	-0.057127	0.513718	-0.573699	-0.090408	-0.401415	-0.494038	-0.644616	0.593889	-0.717693	-0.106247	-0.998537	-0.058872	0.317299	-0.643875	-0.33429	-0.021207	0.490691	-0.052005	0.961915	-1.23776	0.383403	0.08504	1.48923	0.006867
13395735	AT2G22030	5.87171	6.3726	7.25805	5.80858	6.82154	6.74577	5.28221	6.9522	6.61049	6.67765	5.80099	6.49044	6.50753	6.33944	6.2751	6.47579	6.04235	6.57192	6.09267	5.32947	3.92714	5.15801	6.19658	5.97248	0.635818	-0.033164	-0.982945	0.667205	-0.77919	-0.173848	-0.589503	0.579602	-0.647557	0.869068	-1.02055	-0.255328	-0.414857	-1.00996	-2.34796	-1.31777	0.154228	-0.599443	0.174646	-1.58957	-1.70041	-2.18684	1.17478	-0.344115
13396150	AT2G22980	7.51341	8.1177	8.60193	6.79535	7.88524	6.58844	8.24585	8.28153	8.52012	6.77949	7.49555	5.99098	7.9655	8.20602	8.26704	6.69646	6.46073	6.19283	7.8202	8.31855	8.1894	6.14964	6.59235	6.05846	0.452089	0.088322	-0.334888	-0.098893	-1.42451	-0.395609	0.732439	0.163837	-0.081804	-0.015859	-0.38969	-0.597454	-0.145306	0.112531	-0.077644	-0.546812	0.131619	-0.134366	-0.877745	-0.051306	0.00416	-0.530953	0.521309	0.463088
13396253	AT2G23130	6.58966	7.32196	6.77777	6.48004	6.81214	6.04936	7.36027	6.91066	6.42208	7.58148	6.18854	5.62736	5.77872	5.86992	5.56687	5.48874	5.33193	4.9808	5.77453	5.74228	5.35602	5.07599	5.32945	5.04768	-0.810945	-1.45204	-1.21091	-0.991301	-1.4802	-1.06855	0.770602	-0.411302	-0.355695	1.10144	-0.623598	-0.422002	-0.004192	-0.127642	-0.210842	-0.412747	-0.002486	0.066873	-0.774794	0.28366	0.144853	-1.51419	0.621112	0.488875
13396312	AT2G23321	4.44593	4.23645	4.62911	5.41205	4.20257	4.38239	5.59122	4.14067	4.67536	5.84538	5.16742	5.37224	4.20339	4.33544	3.97178	3.47055	4.11593	3.90464	4.78805	4.03404	4.23191	3.60574	3.31709	4.16389	-0.242536	0.09899	-0.657328	-1.94151	-0.086643	-0.477751	1.14529	-0.095777	0.046254	0.433323	0.964849	0.989852	0.584653	-0.301396	0.260131	0.135195	-0.798835	0.259247	-0.560637	-0.205619	0.213877	-0.298128	-1.76368	-0.730605
13396759	AT2G24762	6.24955	6.1962	5.90144	6.32371	6.04382	6.15866	5.48478	5.8108	5.89587	6.04268	5.87758	6.19477	4.84195	5.74596	5.03327	5.76565	5.79799	5.98373	4.7477	5.76406	4.94576	5.73868	5.67044	5.57784	-1.4076	-0.450233	-0.868173	-0.558053	-0.245834	-0.17493	-0.764772	-0.385394	-0.005577	-0.281023	-0.166239	0.036116	-0.094251	0.0181	-0.087516	-0.026971	-0.127544	-0.405886	0.670521	0.403494	-0.081939	0.254052	0.038695	-0.442002
13396791	AT2G24834	2.79009	3.5937	3.82366	3.31104	2.80039	3.6258	3.47427	3.25565	2.729	3.14664	2.83788	4.50284	3.85983	3.48026	3.44272	2.60503	2.69366	3.2012	3.45418	3.165	3.42386	4.57008	3.31644	3.34837	1.06974	-0.113439	-0.380941	-0.70601	-0.10673	-0.424602	0.684176	-0.338054	-1.09466	-0.1644	0.037487	0.877034	-0.405655	-0.315266	-0.018859	1.96504	0.62278	0.147166	-1.08983	0.022788	1.0758	2.12944	0.585293	-0.729868
13396817	AT2G24980	4.0415	4.46942	4.54102	3.44154	4.17004	3.94283	2.91707	3.83269	2.90963	3.16245	3.34561	4.49876	3.61292	4.36386	4.21515	2.98833	3.56845	3.795	3.6185	2.74545	2.80292	3.12073	4.35422	3.23761	-0.428583	-0.10556	-0.32587	-0.453214	-0.60159	-0.147831	-1.12444	-0.636729	-1.63139	-0.279097	-0.824425	0.555932	0.005584	-1.61841	-1.41223	0.132399	0.785776	-0.557385	1.13002	-0.981684	0.219165	0.411496	1.6102	-1.11332
13397280	AT2G26135	3.33301	3.93778	4.09622	4.18192	3.73081	3.90444	4.16437	3.96139	3.71444	3.75902	3.41041	3.84175	4.14721	3.66609	3.96091	3.58096	4.1147	3.85164	4.74912	4.06901	3.86596	4.5559	3.52415	4.12477	0.814199	-0.271691	-0.135314	-0.600958	0.383886	-0.052801	0.831366	0.023611	-0.381789	-0.422892	-0.320402	-0.062685	0.601916	0.402922	-0.094954	0.974945	-0.590553	0.273128	-0.22945	0.379311	0.286835	1.39784	-0.270151	0.335813
13397590	AT2G26820	4.08191	4.31808	3.72768	3.76303	4.13229	4.61308	3.36948	4.71818	3.57716	4.41618	3.95016	4.7608	3.82545	3.46909	3.60473	3.67057	3.00181	2.99093	3.25823	3.12424	3.20429	3.18742	3.15496	3.27415	-0.256456	-0.848982	-0.122942	-0.092452	-1.13047	-1.62215	-0.712429	0.400107	-0.150512	0.653151	-0.182125	0.147714	-0.56722	-0.344855	-0.400444	-0.483157	0.153145	0.28322	0.145209	-0.744962	-0.249932	-1.13631	0.33527	0.135506
13397841	AT2G27402	8.4961	7.9278	8.90011	9.87917	9.71448	8.95478	7.79931	7.30614	7.94041	9.85146	9.4127	7.18495	4.48513	4.12352	4.26005	5.73389	5.25484	4.51922	4.61251	4.31265	5.00373	3.98441	4.51823	4.29882	-4.01097	-3.80429	-4.64006	-4.14528	-4.45963	-4.43556	-0.696786	-0.621664	-0.959696	-0.02771	-0.301781	-1.76983	0.127377	0.189134	0.743676	-1.74948	-0.736609	-0.220401	0.824163	0.810798	1.70337	-1.72177	-0.434828	1.54943
13398351	AT2G28610	3.07213	3.43011	3.6468	3.69255	3.20579	3.01291	3.80535	3.7086	3.37086	3.08948	3.95344	3.85596	3.59497	3.57913	3.44917	3.44758	3.55956	3.91661	3.43101	3.54977	3.26729	3.18605	3.85021	3.37702	0.522831	0.149018	-0.19763	-0.244965	0.353765	0.903699	0.733219	0.278486	-0.275936	-0.603071	0.747653	0.843049	-0.163958	-0.02936	-0.181877	-0.261536	0.290654	-0.539597	-0.897177	-0.307846	0.094059	0.341535	-0.456999	-1.38265
13399123	AT2G30925	1.8375	1.87207	1.79513	1.80765	2.05673	1.81056	2.78824	1.6316	1.59937	1.65825	2.19893	2.22126	2.06978	1.81664	1.7746	2.52664	1.90689	2.29175	1.73299	2.40451	2.01427	1.82878	1.90419	1.79387	0.232283	-0.055433	-0.020533	0.718988	-0.14984	0.481183	0.950745	-0.240476	-0.195767	-0.149402	0.142202	0.410699	-0.336788	0.587868	0.239672	-0.69786	-0.002705	-0.497876	-1.28753	0.828344	0.435439	-0.548458	-0.144907	-0.908575
13399594	AT2G31981	4.43166	4.05576	4.32921	3.86224	3.38449	3.98314	3.75666	4.25787	3.87258	3.78802	4.00913	3.93262	4.43716	4.71841	3.92596	3.79439	4.42673	4.00885	4.20837	3.85422	3.55314	4.74953	3.9709	3.94415	0.005507	0.662649	-0.403251	-0.067853	1.04223	0.025709	-0.674995	0.202116	-0.456639	-0.074223	0.624637	-0.050526	-0.228794	-0.864188	-0.372829	0.955141	-0.455825	-0.064696	0.446201	-1.0663	0.08381	1.02936	-1.08046	-0.01417
13399696	AT2G32210	3.08799	2.79453	2.60542	3.58519	3.10081	2.32538	4.07848	3.0285	2.86271	2.79066	2.9432	2.71631	3.27569	3.1509	2.91872	2.89165	2.87035	3.19546	3.30631	3.46707	3.02565	2.95324	2.89644	3.48552	0.187702	0.356376	0.313294	-0.693541	-0.230457	0.870079	0.990485	0.233972	0.257289	-0.794528	-0.157608	0.390933	0.030612	0.31617	0.106936	0.06159	0.026093	0.29006	-0.959873	0.082198	-0.150353	0.856118	0.183701	-0.100873
13399730	AT2G32270	2.45687	2.59475	2.65888	2.85721	2.59271	2.62042	3.07592	2.805	2.67705	2.42322	2.52364	2.51631	3.34582	3.27193	2.93841	2.96746	2.80456	2.81609	2.99533	2.95495	2.95167	2.87169	2.65524	2.82986	0.888953	0.677175	0.279527	0.110254	0.211845	0.195678	0.619056	0.21025	0.018169	-0.43399	-0.069076	-0.104103	-0.350488	-0.316975	0.013261	-0.09577	-0.149319	0.013763	-0.969544	-0.527225	-0.004908	0.33822	-0.080243	0.117866
13399809	AT2G32350	3.01231	3.62892	3.42638	3.71475	3.44964	3.39809	3.61741	3.75525	3.60278	3.43187	3.48248	3.60032	3.07632	3.43128	3.23102	2.88973	3.72606	3.51442	3.57735	3.88114	3.58991	3.40448	3.47396	3.6954	0.06401	-0.197636	-0.195359	-0.825017	0.276417	0.11633	0.605096	0.126339	0.176395	-0.282879	0.032837	0.202235	0.501032	0.449863	0.358884	0.514747	-0.252102	0.180979	-0.104064	0.323524	0.182489	0.797626	-0.284939	-0.021256
13399845	AT2G32430	6.0441	6.21083	6.27176	7.24672	6.8686	7.5454	5.43951	6.36674	6.41822	7.33527	7.28228	7.63889	6.10961	6.22842	6.14542	7.07455	7.14423	7.37797	6.09485	6.56019	6.30115	7.13291	7.12951	7.51428	0.065515	0.017581	-0.12634	-0.172167	0.275632	-0.167431	-0.604585	0.155907	0.146455	0.088552	0.413681	0.093495	-0.014762	0.331779	0.155726	0.058359	-0.014722	0.136315	0.589823	0.175872	0.009271	-0.030193	-0.428403	0.04282
13399897	AT2G32540	7.00555	6.79833	7.42039	8.08726	8.09316	8.16254	7.69452	7.07085	7.28578	7.85293	7.93069	7.65485	7.52494	7.46834	7.79679	7.894	8.06671	8.02441	7.89509	7.27391	7.43106	7.79352	7.73758	7.84115	0.519387	0.670014	0.376402	-0.193264	-0.026451	-0.138121	0.688967	0.272518	-0.134611	-0.234334	-0.162478	-0.507685	0.370153	-0.194432	-0.365728	-0.10048	-0.329136	-0.183267	-0.318814	-0.46695	-0.231117	0.133854	-0.166658	0.324418
13399934	AT2G32610	2.62181	3.53721	3.63051	3.46382	3.13858	3.36782	3.30593	3.53997	2.50219	2.98588	2.64245	3.28042	3.92951	3.04423	3.71834	3.51392	3.67125	3.5918	3.51962	3.31906	2.87738	2.83073	3.28899	3.42745	1.3077	-0.49298	0.087829	0.050106	0.532675	0.223979	0.684116	0.002759	-1.12832	-0.477941	-0.496132	-0.087406	-0.409889	0.274833	-0.840959	-0.683194	-0.382259	-0.164347	-1.094	0.272074	0.287357	-0.205253	0.113873	-0.076941
13400014	AT2G32740	4.10611	4.084	4.41972	5.33207	3.27711	4.28051	4.86784	4.39437	4.35283	4.32602	3.64293	3.97399	4.50343	4.53027	4.16106	5.68956	4.89857	4.04918	4.35659	3.61661	3.86793	4.68277	4.70967	4.19666	0.397327	0.446274	-0.25866	0.357487	1.62146	-0.231329	0.761728	0.310371	-0.066885	-1.00606	0.365821	-0.306518	-0.146848	-0.913657	-0.29313	-1.00679	-0.188897	0.147482	-0.908576	-1.22403	-0.226245	-0.000734	-0.554718	0.454
13400485	AT2G34185	4.85546	4.88572	4.74858	4.41766	4.50401	4.9418	4.01721	4.73809	4.57306	5.01062	4.45615	4.44204	4.61548	4.5167	5.05682	4.56866	4.48706	4.83164	4.53916	4.43578	4.74322	4.48222	5.16766	4.58268	-0.23998	-0.369015	0.308234	0.150997	-0.01695	-0.11016	-0.838244	-0.147625	-0.175527	0.592958	-0.04786	-0.49976	-0.076316	-0.080923	-0.313598	-0.08644	0.680603	-0.248958	0.761928	0.066702	-0.138071	-0.679398	0.728463	0.250802
13400845	AT2G34925	8.33455	7.94821	8.11786	8.1589	8.65458	8.06247	7.72902	8.14958	7.66713	8.11122	7.88942	7.0856	7.45562	8.24924	8.04306	8.0942	8.05216	7.78971	7.80667	7.65243	8.08705	8.02603	7.81468	6.99225	-0.878931	0.301027	-0.0748	-0.064705	-0.602421	-0.272755	-0.605525	0.201365	-0.450726	-0.047685	-0.765159	-0.976871	0.35105	-0.596808	0.043991	-0.068171	-0.237482	-0.797462	0.956575	-0.798173	0.494717	-0.020486	0.527677	0.179409
13402031	AT2G37620	7.3023	6.89118	6.89203	7.37909	7.21691	7.14617	6.65598	6.36052	6.87455	7.1021	7.36809	7.29183	7.39379	7.18338	7.24709	7.34423	7.58841	7.75342	7.08255	6.78328	6.91296	7.44467	7.51354	7.69887	0.091487	0.2922	0.355063	-0.034859	0.371499	0.607255	-0.646321	-0.530654	-0.017474	-0.276984	0.151178	0.14566	-0.311239	-0.400098	-0.334127	0.100438	-0.074867	-0.05455	0.335082	0.130556	-0.316653	0.377422	-0.226045	-0.20021
13402333	AT2G38390	4.0402	4.74217	4.09858	4.32838	4.28683	4.82446	4.8598	4.55926	4.49231	3.62367	4.21792	4.01106	4.18224	4.63363	4.227	3.85416	4.06525	4.1302	4.50459	3.79793	3.76426	3.79924	4.16351	4.42685	0.142037	-0.108539	0.128418	-0.474218	-0.221583	-0.69426	0.819607	-0.182913	0.393728	-0.704709	-0.068913	-0.8134	0.322351	-0.835704	-0.462744	-0.054923	0.098259	0.296652	-0.497256	-0.652791	-0.856472	0.649786	0.167172	1.11005
13402585	AT2G38900	4.63908	4.43247	4.52775	4.21567	3.74851	4.39973	3.97912	5.68599	3.31504	4.11998	4.33964	4.80276	3.8719	3.90112	4.21774	4.37673	3.37324	4.78439	4.44951	3.51323	3.50884	3.46147	4.65189	3.52397	-0.767183	-0.531351	-0.310005	0.161059	-0.375265	0.384659	-0.659964	1.25353	-1.21271	-0.095685	0.591135	0.403026	0.577614	-0.387888	-0.708906	-0.915253	1.27865	-1.26042	1.23758	-1.64141	0.503804	-0.819568	0.687511	-1.66344
13402624	AT2G38995	6.60934	6.20092	7.0617	7.91332	7.84993	8.17551	5.72891	6.1947	6.3258	7.50454	7.63783	6.78046	5.52544	5.89559	5.67306	6.64657	6.82651	6.84019	5.49954	5.53407	5.74581	6.75705	6.62757	6.70828	-1.08391	-0.305334	-1.38864	-1.26675	-1.02342	-1.33531	-0.880437	-0.006229	-0.735899	-0.408781	-0.212099	-1.39505	-0.025893	-0.361524	0.072749	0.110477	-0.198939	-0.13191	0.854544	-0.355295	0.808648	0.519258	0.01316	1.26314
13402761	AT2G39430	3.42277	5.12446	4.51496	5.27091	4.60329	4.71709	4.17112	4.7394	4.18402	4.83762	4.55302	4.18126	4.6833	4.06378	4.09708	4.57088	4.42477	4.74417	5.09466	4.36763	4.29238	4.71925	4.69267	4.71634	1.26054	-1.06069	-0.417883	-0.700037	-0.178525	0.027078	0.748358	-0.385063	-0.33094	-0.433296	-0.050272	-0.535831	0.411353	0.303859	0.195308	0.14837	0.2679	-0.027828	-0.337005	0.688922	0.526248	0.581666	0.318172	0.508003
13403175	AT2G40240	6.76042	6.27699	6.62953	6.21292	6.01031	6.14869	6.14294	6.61325	6.53228	6.09203	5.99441	5.28569	6.57353	6.34998	6.33185	6.51575	6.13981	6.32648	6.22406	6.62058	6.66932	6.00273	6.35584	6.14528	-0.186886	0.072984	-0.297679	0.302829	0.129498	0.177786	-0.617474	0.33626	-0.097255	-0.120887	-0.015907	-0.863007	-0.349475	0.270606	0.33747	-0.513021	0.216026	-0.1812	0.267999	-0.065654	0.434725	-0.392134	0.231933	0.681807
13403405	AT2G40740	6.2899	5.56492	5.17842	5.55281	5.55851	5.03912	7.09828	5.82641	5.7823	6.09761	5.58219	5.64133	8.20307	6.50141	6.13287	7.38801	5.78428	6.71112	8.71729	7.33319	6.36656	7.27738	6.57461	6.32458	1.91318	0.936488	0.954452	1.8352	0.225774	1.67201	0.808379	0.261484	0.60388	0.544801	0.023686	0.602217	0.514216	0.83178	0.233687	-0.11063	0.790335	-0.38654	-0.294163	0.570296	-0.370193	-0.655431	0.766649	-0.988757
13403667	AT2G41231	7.30145	5.69929	5.35598	5.41944	5.43563	5.32136	6.49842	6.04184	5.28001	5.50624	5.46878	5.34603	7.11472	6.1141	5.61888	6.03818	5.98841	5.63988	7.17641	6.79774	5.93529	5.40658	5.30269	5.81491	-0.186735	0.414813	0.262894	0.61874	0.552778	0.318524	-0.80303	0.34255	-0.075977	0.086794	0.033151	0.024671	0.061696	0.683634	0.316414	-0.631598	-0.685714	0.175024	0.864726	0.341084	0.392391	-0.718392	-0.718865	0.150353
13404097	DQ108661	4.90697	6.22686	5.99635	4.70095	4.68638	3.60487	4.25632	6.33537	5.75619	4.49908	3.90516	3.5432	4.30741	3.87616	4.17141	4.52442	4.70014	3.75469	4.12775	4.23722	4.22087	4.05838	4.27854	3.90351	-0.59956	-2.3507	-1.82493	-0.176531	0.01376	0.14982	-0.650649	0.108508	-0.240161	-0.20187	-0.781221	-0.061676	-0.179664	0.361063	0.049456	-0.466032	-0.421599	0.148814	0.470985	0.252555	0.289617	-0.264162	0.359622	0.21049
13404555	AT2G43535	6.95206	7.73229	8.67565	7.267	6.88467	6.4431	7.69864	8.35075	7.98154	7.55856	7.54215	7.2388	4.60077	5.35403	5.45622	4.33159	4.17446	4.67737	5.15585	5.15214	4.98032	5.09744	4.96171	4.95169	-2.35129	-2.37826	-3.21943	-2.93541	-2.71021	-1.76573	0.746574	0.618462	-0.694108	0.291563	0.657478	0.795707	0.555085	-0.201891	-0.475896	0.765845	0.787251	0.274325	-0.191489	-0.820353	0.218212	0.474282	0.129773	-0.521382
13404591	AT2G43670	2.03628	2.18793	2.05126	2.23905	2.32922	2.10229	2.89187	2.18362	2.35553	2.07651	2.60022	2.2946	2.42674	2.68345	2.43285	2.55681	2.57443	2.2184	2.39784	2.24437	2.61141	2.41192	2.47521	2.36739	0.390467	0.495521	0.381591	0.317762	0.245209	0.116112	0.85559	-0.004312	0.304265	-0.162539	0.270998	0.192314	-0.028904	-0.439088	0.17856	-0.144894	-0.099217	0.148996	-0.884494	-0.434776	-0.125705	0.017645	-0.370215	-0.043318
13405429	AT2G45650	3.00034	2.87679	2.77993	3.11337	2.69946	2.90049	3.79495	2.97697	3.01562	3.01342	2.937	3.01984	2.99661	3.28109	2.89612	3.36845	3.678	3.41958	3.50395	3.17935	3.7392	3.1953	3.0861	3.17341	-0.003726	0.404296	0.116185	0.255079	0.978543	0.519087	0.794617	0.100177	0.235692	-0.099948	0.237543	0.119347	0.507341	-0.101742	0.843082	-0.173146	-0.591902	-0.246173	-0.287276	-0.201919	0.60739	-0.073198	-0.829445	-0.36552
13405538	AT2G45890	4.39123	4.49153	4.1365	4.02174	4.27437	3.94288	3.70878	4.57124	3.71949	3.54732	4.3355	4.39154	4.46884	4.81595	4.20382	4.73481	5.09212	4.56489	4.38499	4.76895	4.54683	4.35373	4.42758	4.30077	0.077618	0.324424	0.067315	0.713073	0.817753	0.622013	-0.682449	0.079714	-0.417012	-0.474415	0.061131	0.44866	-0.083854	-0.047005	0.343008	-0.38108	-0.664539	-0.264121	0.598595	-0.126719	0.76002	0.093335	-0.72567	-0.712781
13405570	AT2G45940	4.44943	4.75485	5.0337	4.10192	4.68012	4.68012	3.70845	4.57921	3.996	4.45273	5.04761	6.46164	4.42166	4.74095	4.96913	4.81521	4.80154	5.07207	4.49094	4.74077	4.20111	4.61295	5.40071	5.78487	-0.027768	-0.0139	-0.064566	0.713297	0.12142	0.39195	-0.740977	-0.175644	-1.03769	0.350818	0.367494	1.78153	0.069275	-0.000182	-0.768025	-0.202265	0.599179	0.712804	0.810252	0.175462	0.269669	-0.553083	0.231685	-1.06872
13405643	AT2G46130	3.11221	2.99271	2.36491	2.73665	2.81176	2.74646	2.51606	2.71763	2.46131	3.15435	3.22438	2.9055	2.9224	2.92045	3.15905	3.27936	2.86367	2.81375	2.8707	2.7683	2.90952	3.41035	2.9737	3.12658	-0.189806	-0.072267	0.794144	0.54271	0.051914	0.067291	-0.596145	-0.275082	0.096407	0.417703	0.41262	0.15904	-0.051699	-0.152142	-0.249529	0.130991	0.110024	0.312832	0.544446	0.12294	-0.345936	-0.286712	-0.302596	0.153792
13405669	AT2G46190	2.91137	3.27565	3.1551	3.31245	3.31713	3.60708	3.58934	3.41835	3.42481	3.44316	3.33708	3.24188	3.72448	3.68281	3.5442	3.6474	3.52223	3.49669	3.33866	3.60769	3.5079	3.36112	3.54959	3.69363	0.813111	0.407157	0.389098	0.334949	0.205106	-0.11039	0.677969	0.1427	0.269708	0.130711	0.019955	-0.365201	-0.385822	-0.075119	-0.036294	-0.286274	0.027358	0.196939	-1.06379	-0.217819	-0.306002	-0.416985	0.007403	0.56214
13405676	AT2G46210	4.28705	3.61131	3.396	3.95668	3.29256	3.34914	3.61926	3.29224	2.9309	3.77337	3.55758	3.16741	4.16528	3.56057	3.47705	4.40812	3.86164	3.7649	4.4435	3.70411	3.2916	4.23314	3.72267	3.70786	-0.12178	-0.050746	0.081047	0.451438	0.569082	0.415756	-0.667796	-0.319078	-0.465106	-0.183316	0.265018	-0.181732	0.27822	0.143542	-0.185455	-0.174981	-0.138968	-0.057037	0.946016	0.46262	0.279651	0.008335	-0.403986	0.124695
13406076	AT2G47190	4.73431	4.76985	5.23684	4.70855	5.64999	5.56085	5.65025	5.46458	5.63865	4.78522	6.26061	7.47677	6.10525	6.07192	6.54868	5.12218	6.10264	5.86919	6.71834	7.24462	7.02286	5.87687	5.96141	7.6444	1.37094	1.30207	1.31184	0.413633	0.452645	0.308345	0.91594	0.694732	0.401811	0.076666	0.610625	1.91593	0.613088	1.1727	0.474183	0.754686	-0.141225	1.7752	-0.302852	0.477965	0.072372	0.67802	-0.75185	-0.140723
13406111	AT2G47230	7.4648	7.03726	7.49834	7.45019	7.21376	7.15123	6.8716	6.96455	7.26786	7.24569	7.17482	6.45089	6.68666	6.742	7.10858	6.96692	6.76016	6.32501	6.36904	6.30099	6.69579	6.89905	6.70332	6.32599	-0.778138	-0.295264	-0.389756	-0.483275	-0.453597	-0.826226	-0.593196	-0.072715	-0.230477	-0.204505	-0.038937	-0.700347	-0.317618	-0.441014	-0.41279	-0.067873	-0.056841	0.000979	0.275578	-0.368299	-0.182313	0.136632	-0.017904	0.701326
13406123	AT2G47240	9.84823	8.94652	9.18115	10.1792	8.80785	8.50165	9.2679	9.01388	9.06029	10.1107	8.7087	8.31196	9.57714	8.79833	8.96394	9.96825	8.63131	8.43143	9.47028	8.7675	8.98851	9.76874	8.51256	8.50523	-0.271087	-0.148192	-0.21721	-0.210921	-0.176534	-0.070219	-0.580332	0.067364	-0.120868	-0.06842	-0.099143	-0.189692	-0.106864	-0.030824	0.024567	-0.199509	-0.118755	0.073798	0.473468	-0.098188	0.145435	-0.131089	-0.019612	0.26349
13406379	AT2G47630	7.6959	7.63176	8.00292	7.9418	8.48839	8.55213	7.11113	7.67271	7.82927	7.78224	8.11898	8.32048	7.9229	8.06012	8.08473	8.21257	8.71859	8.46015	7.77976	7.7308	7.82757	8.03937	8.58477	8.35505	0.226998	0.428355	0.081812	0.270771	0.230194	-0.091982	-0.584764	0.040951	-0.173652	-0.159561	-0.36941	-0.231651	-0.14314	-0.32932	-0.257163	-0.173205	-0.13382	-0.105103	0.441624	-0.370271	-0.083511	-0.013644	0.23559	0.126548
13406413	AT2G47770	2.85934	3.08005	3.24872	2.90219	3.79238	4.98229	3.63263	2.87164	3.12911	3.34424	3.68639	6.13751	3.30758	3.15132	2.86927	3.63836	3.34424	4.48299	3.23009	2.79204	3.48644	4.08464	3.55862	4.35946	0.448247	0.071271	-0.379448	0.736172	-0.448145	-0.499295	0.773298	-0.208415	-0.119612	0.442053	-0.105992	1.15523	-0.077493	-0.359286	0.617171	0.446282	0.214379	-0.123529	-0.850791	-0.150871	0.736783	0.004229	0.320371	-1.27876
13406863	AT2G01505	7.12821	7.18968	7.21398	7.63033	7.91461	8.20213	6.39832	6.61716	6.99268	6.96777	7.55761	7.65567	7.26789	7.29035	7.63499	7.91653	8.2879	8.47882	6.8361	7.12302	7.41901	7.93854	8.16267	8.43735	0.139677	0.10067	0.421008	0.286195	0.373293	0.276691	-0.729885	-0.572516	-0.221298	-0.662558	-0.357003	-0.546457	-0.431791	-0.16733	-0.215983	0.022013	-0.125234	-0.041463	0.298094	0.405186	0.005315	0.684571	0.231769	0.504994
13406866	AT2G01510	5.834	6.34303	7.4687	6.57301	6.1028	5.79871	6.49161	6.84383	7.51625	6.79716	5.62994	6.21345	6.3174	6.9326	6.63669	6.70946	5.46089	5.87961	5.7196	6.41548	6.3766	6.78254	6.01541	5.8871	0.483409	0.589567	-0.832013	0.136451	-0.641912	0.080897	0.657613	0.5008	0.04755	0.224153	-0.472861	0.414734	-0.597801	-0.517114	-0.260083	0.073074	0.554526	0.007485	-1.25541	-1.01791	-0.307633	-0.151079	1.02739	-0.407249
13406962	AT2G01770	4.9177	4.22677	3.77574	4.16715	4.10053	4.04048	4.14101	4.30513	4.68903	3.76342	4.22426	3.93632	4.76555	4.57027	4.99751	4.73047	4.72047	4.49105	5.0505	4.73258	4.93022	4.60088	4.95187	4.53803	-0.152148	0.343497	1.22177	0.563318	0.619947	0.45057	-0.776687	0.078355	0.913295	-0.403732	0.123737	-0.104155	0.284948	0.162306	-0.067295	-0.129588	0.231393	0.046985	1.06164	0.083951	-0.98059	0.274144	0.107656	0.15114
13407025	AT2G01890	5.65132	7.20252	7.25278	7.29772	8.81528	8.46684	6.4516	6.09507	7.02164	7.44803	8.56311	8.53417	6.75331	7.79619	8.03278	8.13342	8.55105	9.06724	7.10384	7.1388	7.37276	7.84678	8.56219	8.83555	1.102	0.593665	0.779998	0.835704	-0.264231	0.600406	0.800285	-1.10745	-0.231141	0.150305	-0.252176	0.06733	0.350526	-0.657387	-0.660015	-0.286646	0.011137	-0.231697	-0.449759	0.450065	-0.428874	-0.436951	0.263313	-0.299027
13407070	AT2G02000	3.06785	3.36535	3.59456	3.39029	3.75076	3.53304	3.8496	3.67764	3.27463	3.49127	3.55348	3.40197	3.57796	3.57846	3.69974	3.65701	3.50124	3.61046	3.65001	3.90494	3.56814	3.63263	3.70883	3.58605	0.510114	0.213107	0.105184	0.26672	-0.249521	0.077416	0.78176	0.312293	-0.31993	0.100978	-0.197276	-0.131069	0.072055	0.326486	-0.131605	-0.024374	0.207587	-0.024403	-0.709705	0.014193	0.188325	-0.125352	0.404863	0.106666
13407078	AT2G02010	5.37645	4.57958	4.18317	4.53929	4.76072	4.89111	6.24576	5.658	5.34244	4.71301	5.1825	6.47044	7.73538	6.2065	5.48848	6.23255	5.89503	6.15581	8.2579	7.2583	6.39278	5.98065	5.80243	6.82026	2.35893	1.62692	1.30531	1.69327	1.1343	1.2647	0.869314	1.07842	1.15927	0.173725	0.421776	1.57933	0.522517	1.05181	0.904297	-0.251906	-0.0926	0.66445	-0.346797	-0.02662	-0.254972	-0.425631	-0.514376	-0.914875
13407146	AT2G02280	2.70722	2.07218	2.46574	2.46846	2.98025	2.15996	2.10693	2.4982	3.14616	2.35339	2.01297	2.22126	2.43872	3.67016	2.4758	2.46574	2.47203	2.18994	2.14355	2.8214	2.50024	2.50665	2.61152	2.90091	-0.268491	1.59798	0.01006	-0.002711	-0.508222	0.029982	-0.600287	0.426024	0.680419	-0.115065	-0.967279	0.061304	-0.295172	-0.848755	0.024439	0.040905	0.13949	0.710968	0.305115	-1.27478	-0.65598	0.15597	1.10677	0.649664
13407158	AT2G02320	4.75978	4.20535	4.06772	4.28144	3.85374	4.69105	3.57604	4.64986	3.41389	3.48963	3.3955	4.0287	6.00859	5.0017	4.37027	4.39563	4.9645	4.62884	6.53979	5.31032	4.08444	4.9973	4.95386	4.87967	1.24882	0.79635	0.302548	0.114183	1.11076	-0.062207	-1.18374	0.444509	-0.653833	-0.791808	-0.458242	-0.66235	0.531199	0.308614	-0.285827	0.60167	-0.010638	0.250829	1.71494	-0.135895	0.368006	1.39348	0.447604	0.913179
13407398	AT2G03200	5.41137	4.47882	4.89802	5.12984	4.78611	5.323	4.8356	5.66525	4.38274	4.51086	4.78611	5.51525	4.07327	4.72336	4.63227	4.11003	4.378	5.1809	4.34353	4.21321	4.49041	4.14853	4.25809	4.99538	-1.3381	0.24454	-0.265751	-1.01981	-0.408107	-0.142102	-0.575767	1.18643	-0.515279	-0.618982	0	0.192248	0.27026	-0.510147	-0.141861	0.038507	-0.119911	-0.185518	0.846027	-1.69658	0.373418	0.657489	-0.119911	-0.377766
13407639	AT2G04060	2.28627	2.56031	2.38456	2.55893	2.29692	2.63961	2.9177	2.60056	2.33086	2.48428	2.37469	2.22502	2.56837	2.78717	3.04624	2.78771	2.77795	2.68686	2.69886	2.68435	2.94621	2.50171	2.31935	2.82419	0.282099	0.226861	0.661673	0.22878	0.481032	0.047245	0.631421	0.040251	-0.053707	-0.074657	0.077763	-0.414588	0.130482	-0.102822	-0.100027	-0.286003	-0.458605	0.137334	-0.500939	-0.143073	-0.04632	-0.211346	-0.536368	0.551922
13407656	AT2G04070	5.4683	4.28001	2.93952	3.87854	4.08003	5.26824	6.21692	4.82174	4.2401	5.06079	6.42234	6.8824	3.1782	3.31014	2.62	2.94462	2.8471	3.07399	2.95804	2.88675	3.01799	2.8603	2.69354	2.84864	-2.2901	-0.969871	-0.319515	-0.933919	-1.23293	-2.19425	0.748617	0.541737	1.30058	1.18225	2.34231	1.61416	-0.220168	-0.423388	0.397982	-0.084321	-0.153553	-0.225347	-0.968785	-0.965125	-0.902601	-1.26657	-2.49586	-1.83951
13407663	AT2G04080	5.07764	4.96913	5.51554	5.09757	5.54896	5.96457	5.69367	4.91712	5.73759	5.53057	7.13403	7.90089	4.23081	4.59676	4.87711	4.67086	4.7797	4.69312	3.89309	4.11827	4.73487	4.38141	4.14137	5.23597	-0.846836	-0.37237	-0.638432	-0.426709	-0.76926	-1.27145	0.616027	-0.052014	0.222047	0.433	1.58506	1.93633	-0.337719	-0.478492	-0.142234	-0.289454	-0.638338	0.542851	-0.953746	-0.426478	-0.364281	-0.722454	-2.2234	-1.39348
13407677	AT2G04100	5.19582	5.49316	5.71521	4.62436	6.29387	5.95207	5.86478	5.41396	5.59526	4.99818	6.94544	7.34301	6.09664	6.7359	6.13422	5.85375	7.2236	7.66252	6.34922	7.08495	6.646	6.25959	7.80517	8.48323	0.900828	1.24274	0.41901	1.2294	0.929723	1.71045	0.668962	-0.079203	-0.119951	0.373823	0.651565	1.39093	0.252572	0.349049	0.511772	0.40584	0.581568	0.820702	-0.41639	0.428252	0.631723	0.032017	-0.069997	-0.570232
13407765	AT2G04395	3.90627	3.32606	3.75129	3.75597	3.57235	4.02863	2.85646	4.49906	2.96251	3.46151	4.85239	3.85352	3.61275	3.30887	3.4584	2.92106	2.75997	3.39679	3.35634	2.86358	3.08251	2.49103	3.46776	3.30218	-0.29352	-0.01719	-0.292886	-0.834907	-0.812379	-0.631839	-1.04982	1.173	-0.788779	-0.294456	1.28004	-0.175116	-0.256413	-0.445289	-0.375895	-0.430038	0.707792	-0.094618	0.793404	-1.61829	0.412884	-0.135582	-0.572245	0.080498
13407893	AT2G04910	4.81521	5.61344	5.7212	5.28751	5.25255	5.50515	5.68161	6.7953	4.68386	5.54975	4.72867	6.12703	4.61854	4.24058	5.02219	4.18533	3.98887	4.5795	4.63708	4.46192	3.48082	3.93323	5.20159	4.09807	-0.196663	-1.37286	-0.699008	-1.10218	-1.26368	-0.925651	0.866401	1.18186	-1.03735	0.262241	-0.523879	0.621875	0.018531	0.221341	-1.54137	-0.252095	1.21273	-0.48143	-0.84787	-0.960515	-0.504023	-0.514336	1.7366	-1.1033
13407928	AT2G05117	3.53689	4.23171	4.50059	3.91399	4.05636	4.13599	4.32084	4.73595	4.33315	4.31194	3.82531	3.67564	6.50783	7.03834	6.12528	6.18934	6.54687	6.76628	6.89945	7.14572	6.87665	6.20444	7.00472	6.39457	2.97094	2.80663	1.62469	2.27535	2.49051	2.63029	0.783949	0.504246	-0.167434	0.39795	-0.231053	-0.460349	0.391617	0.107384	0.751375	0.015105	0.457851	-0.371719	-0.392332	-0.396862	0.918809	-0.382845	0.688904	0.08863
13407980	AT2G05360	4.69931	4.49792	4.28933	4.0983	4.22783	5.21096	3.18679	4.4795	3.90419	4.11758	3.76843	4.42077	3.6738	3.14574	3.54026	3.76843	3.15108	3.33611	3.54417	3.64085	3.38399	3.97399	3.581	3.28769	-1.02551	-1.35217	-0.749075	-0.329865	-1.07675	-1.87485	-1.51252	-0.018417	-0.385145	0.019284	-0.459402	-0.790185	-0.129623	0.4951	-0.156266	0.205561	0.429919	-0.048416	1.38289	0.513517	0.228879	0.186277	0.889321	0.741769
13408014	AT2G05642	3.59584	3.50021	3.98318	3.85901	3.53697	3.16915	2.82944	3.7327	9.39774	3.54439	3.26939	3.16781	10.5995	10.9187	10.8573	10.5217	10.8147	10.6975	10.6219	10.9012	10.5962	10.5799	10.7199	10.5657	7.00364	7.4185	6.87412	6.66266	7.27769	7.52835	-0.766396	0.232484	5.41456	-0.314624	-0.26758	-0.001339	0.02239	-0.01747	-0.26109	0.05826	-0.0948	-0.13182	0.788786	-0.249954	-5.67565	0.372884	0.17278	-0.130481
13408059	AT2G05915	4.56776	5.57544	5.70845	6.1983	4.53895	5.39045	4.72445	6.04333	5.46777	6.27396	4.93934	5.30665	6.39198	4.45315	5.1564	6.53137	4.66616	5.95095	6.32752	6.19822	6.03001	6.33343	5.56817	5.11609	1.82422	-1.12229	-0.552046	0.333066	0.127215	0.560502	0.156688	0.467889	-0.240679	0.075652	0.400389	-0.0838	-0.064458	1.74507	0.873608	-0.197935	0.902005	-0.834867	-0.221146	1.27718	1.11429	-0.273587	0.501616	-0.751067
13408324	AT2G07691	4.96378	5.69488	5.9069	5.86956	5.86956	5.92318	5.77976	5.92601	5.81923	5.52347	5.68759	6.07763	5.86956	5.86956	6.00999	5.93263	6.02698	5.68788	6.28844	5.883	6.0264	5.67653	6.36405	5.56567	0.905781	0.174679	0.103088	0.063075	0.157419	-0.235298	0.815984	0.231135	-0.087666	-0.346086	-0.181971	0.154447	0.418884	0.013443	0.016409	-0.256108	0.337071	-0.122208	-0.3971	-0.217692	0.104075	0.089978	0.519042	-0.276655
13408466	AT2G10557	6.11647	6.31814	6.35801	6.09914	5.38455	6.76975	5.02834	6.6107	5.38047	5.78751	5.44484	5.07624	4.55465	4.61659	4.50135	4.79288	3.89964	4.39071	4.44664	4.05825	3.54418	4.38152	6.03347	4.67233	-1.56182	-1.70156	-1.85666	-1.30626	-1.48491	-2.37904	-1.08813	0.292559	-0.977538	-0.31163	0.060298	-1.69352	-0.108007	-0.558331	-0.957177	-0.411359	2.13383	0.281618	0.980122	-0.85089	0.020361	-0.099729	2.07353	1.97514
13408528	AT2G11462	5.3559	6.12063	6.26628	5.59223	6.12585	7.29546	6.27613	7.36725	6.0221	5.75062	5.94205	6.13515	5.57555	4.96659	5.34811	5.19456	4.97799	5.70377	5.6143	4.66432	4.73993	4.50154	4.82717	4.91585	0.219651	-1.15404	-0.918172	-0.397666	-1.14786	-1.59169	0.920233	1.24662	-0.244182	0.158394	-0.18381	-1.16032	0.038749	-0.302271	-0.608184	-0.69302	-0.150822	-0.787919	-0.881484	-1.54889	-0.364002	-0.851414	0.032988	0.372399
13408557	AT2G12190	7.03511	7.21839	7.48519	7.18178	7.33162	7.63284	6.19791	6.8086	7.16625	7.36807	7.03838	6.82204	3.8727	3.08821	4.15106	4.27438	3.20941	3.19809	3.83488	3.10907	2.85878	3.14679	3.66903	3.52017	-3.16242	-4.13018	-3.33413	-2.9074	-4.12221	-4.43475	-0.837208	-0.409789	-0.318941	0.186289	-0.293239	-0.810806	-0.037817	0.020859	-1.29228	-1.12759	0.459616	0.322079	0.799391	0.430648	-0.973338	-1.31388	0.752855	1.13288
13408579	AT2G12462	7.48874	7.699	7.50081	8.5326	8.27362	8.66971	6.90412	7.69313	7.12636	7.69801	8.69304	8.23102	6.80122	7.04939	6.53388	7.61408	8.21233	8.25321	6.64944	6.42114	6.25417	7.1948	7.96238	8.07849	-0.687514	-0.649615	-0.966931	-0.91852	-0.061288	-0.416501	-0.584612	-0.005875	-0.374452	-0.834592	0.419413	-0.438685	-0.151779	-0.628251	-0.279704	-0.419278	-0.249954	-0.174714	0.432833	-0.622376	0.094748	0.415314	-0.669367	0.263971
13408688	AT2G13542	2.9917	2.19585	2.96359	2.71816	2.34674	2.83877	2.40505	2.55096	2.64569	2.3631	3.1507	3.20216	2.75246	2.42582	2.57067	2.54348	2.52646	2.64269	2.14604	2.58143	2.30268	2.56974	2.58457	2.37947	-0.23924	0.229966	-0.39292	-0.174675	0.179722	-0.196086	-0.586651	0.355109	-0.317899	-0.355059	0.803959	0.363392	-0.606425	0.155609	-0.267993	0.026253	0.058111	-0.263218	-0.019774	-0.1995	0.049906	0.381312	-0.745848	-0.62661
13408691	AT2G13550	6.96306	6.57803	6.66693	6.60342	6.69822	6.58214	6.31887	6.66732	6.78166	6.99479	6.60285	6.69942	7.86887	8.22749	8.49521	8.35691	8.40229	8.16814	8.32452	8.30646	8.38231	8.29357	8.66638	8.11281	0.905807	1.64946	1.82828	1.75349	1.70407	1.586	-0.644196	0.089288	0.114728	0.391371	-0.095366	0.117283	0.455652	0.078973	-0.112906	-0.06334	0.264088	-0.055328	1.09985	-0.010315	-0.227634	-0.454711	0.359454	-0.172611
13408790	AT2G14160	4.63569	5.3914	4.93345	3.87595	3.58507	2.77742	5.41513	5.77837	4.5415	3.74439	3.59078	3.15178	3.76672	3.68803	3.38301	3.7359	3.61508	3.50929	3.96989	3.62338	3.92191	3.44709	3.46073	3.63311	-0.868963	-1.70338	-1.55044	-0.14005	0.030002	0.73187	0.779445	0.386971	-0.391953	-0.131551	0.005702	0.374366	0.203169	-0.06464	0.5389	-0.288804	-0.154346	0.123819	-0.576276	-0.451611	0.930853	-0.157253	-0.160048	-0.250547
13408832	AT2G14282	4.16365	3.70444	3.56563	3.11998	3.39783	3.39171	3.40742	3.69402	3.56563	3.44205	3.30766	3.33484	3.54685	3.6648	3.46987	3.77104	3.65105	3.80539	3.72679	3.82283	3.94813	3.26832	3.42184	3.67694	-0.6168	-0.039635	-0.095757	0.651063	0.253213	0.413672	-0.756226	-0.010417	0	0.322072	-0.090177	-0.056878	0.179943	0.158021	0.478257	-0.502727	-0.229205	-0.128442	0.936169	0.168438	0.478257	-0.824799	-0.139028	-0.071564
13408848	AT2G14378	4.3901	5.1248	5.16072	4.98152	3.9356	5.65278	5.21382	5.80222	4.17856	4.37912	4.45696	4.82606	3.48386	4.32108	3.8941	3.76911	3.79144	4.31889	3.88558	3.60045	3.61261	3.91523	3.81957	3.25648	-0.906239	-0.803722	-1.26662	-1.21241	-0.144153	-1.3339	0.823716	0.677422	-0.982164	-0.602405	0.521362	-0.826719	0.401718	-0.720632	-0.28149	0.146114	0.028126	-1.06241	-0.421998	-1.39805	0.700674	0.748519	-0.493236	-0.235691
13408881	AT2G14580	4.42131	4.04624	3.55654	4.29477	3.80788	3.68668	3.70241	3.57908	3.9898	3.61028	4.2095	3.65023	5.19826	4.84448	4.22661	4.80659	5.00519	4.5876	5.44777	5.03001	4.74296	4.43791	5.02515	4.50441	0.776949	0.798238	0.670067	0.51182	1.19731	0.900918	-0.718897	-0.467158	0.433258	-0.684491	0.40162	-0.036443	0.249509	0.185537	0.516348	-0.368685	0.019967	-0.083186	0.968406	0.652695	0.08309	0.315806	-0.381653	-0.046743
13409023	AT2G15360	2.35902	2.20462	2.85602	2.51539	2.29976	2.34811	3.15276	2.2817	2.15423	2.27119	2.25768	2.77867	2.72573	2.47381	2.61328	2.52409	2.37736	2.2243	2.74038	2.1953	2.25667	2.48617	2.18305	2.44775	0.36671	0.269192	-0.242738	0.0087	0.077601	-0.123812	0.793738	0.077076	-0.701781	-0.244203	-0.042071	0.430561	0.014648	-0.278517	-0.35661	-0.037917	-0.194309	0.223454	-0.77909	-0.355593	0.345171	0.206286	-0.152238	-0.207107
13409649	AT2G17470	3.64409	4.13053	3.92248	4.09933	4.54941	3.98668	4.38859	4.50816	3.70679	4.00688	4.46246	4.43016	4.08252	4.56975	4.23888	3.93982	4.15973	4.34008	4.28717	4.45389	4.34854	4.17793	3.82321	3.75004	0.438437	0.439227	0.316403	-0.159504	-0.389678	0.353406	0.744509	0.37763	-0.215686	-0.092443	-0.086951	0.443479	0.204649	-0.115867	0.109655	0.238107	-0.336519	-0.59004	-0.53986	-0.493497	0.325341	0.33055	-0.249568	-1.03352
13410166	AT2G18810	2.85838	3.71887	4.6504	3.88141	3.14387	4.62545	3.79628	4.77601	3.58415	3.44188	3.22534	4.12767	3.46415	3.77319	4.27184	3.49023	3.34211	2.94076	3.2128	2.79521	2.77718	2.98072	3.11722	2.50676	0.605773	0.054321	-0.378562	-0.391185	0.198239	-1.68469	0.937908	1.05714	-1.06625	-0.439535	0.081479	-0.497773	-0.251351	-0.977982	-1.49466	-0.509506	-0.224886	-0.433999	-1.18926	-2.03512	-0.428412	-0.069971	-0.306365	0.063774
13410201	AT2G18920	3.88751	4.47002	4.28137	4.24529	4.01588	4.19144	4.01588	4.31829	3.69443	4.43004	3.97772	4.01588	4.13603	3.72756	4.11384	3.82483	3.84481	4.04518	3.83478	4.03511	4.09121	3.7697	4.01588	3.84347	0.248516	-0.742466	-0.167535	-0.420463	-0.171074	-0.14626	0.12837	-0.151734	-0.586946	0.184749	-0.038163	-0.175558	-0.301251	0.307552	-0.022627	-0.055124	0.171074	-0.201709	-0.429621	0.459286	0.564319	-0.239873	0.209237	-0.026151
13410252	AT2G19190	8.27072	8.13944	7.04605	6.60245	6.98848	5.91298	9.02036	9.10695	9.36923	7.477	7.4172	7.75181	9.54519	9.10973	8.10291	8.00669	7.57478	7.50691	10.0443	9.82523	9.24129	8.20104	7.74885	7.94627	1.27447	0.970295	1.05686	1.40424	0.586298	1.59393	0.749643	0.967511	2.32318	0.874549	0.428721	1.83883	0.499133	0.7155	1.13838	0.194353	0.174075	0.439356	-0.25051	-0.252011	-1.1848	-0.680196	-0.254646	-1.39948
13410374	AT2G19440	5.21942	5.16726	5.21627	5.14973	4.78063	5.9723	4.5433	5.69652	4.97243	5.40188	4.46899	4.89288	5.24176	5.34856	4.76513	4.29371	4.43887	4.87319	4.85543	5.11234	4.21391	5.11469	5.04123	4.05933	0.022346	0.181296	-0.451147	-0.856024	-0.341763	-1.09911	-0.676115	0.529258	-0.243838	0.252146	-0.31164	-1.07943	-0.38633	-0.236221	-0.551217	0.820984	0.602362	-0.813865	0.289785	-0.765479	-0.307379	0.568838	0.914002	0.26556
13410458	AT2G19670	8.33453	8.25759	8.22356	7.22625	7.4661	7.66422	7.66547	7.96447	8.22266	7.4092	7.57292	7.26088	8.19555	8.22027	7.8869	7.23124	7.54844	7.98	7.66042	7.73945	7.9107	6.97346	7.11495	7.96723	-0.138975	-0.037313	-0.336663	0.004991	0.082336	0.31578	-0.669061	-0.293112	-0.000899	0.182955	0.106815	-0.403339	-0.535134	-0.480822	0.023803	-0.257782	-0.433492	-0.012773	0.133927	-0.18771	0.024702	-0.440737	-0.540307	0.390566
13410581	AT2G19930	5.71483	6.29062	6.76421	5.88205	6.20636	6.17075	6.40524	6.6891	6.30723	5.27785	6.29129	5.84474	6.20173	7.07644	6.85092	6.02263	6.38732	6.25701	5.90885	6.20636	6.52591	6.15622	6.19241	5.84539	0.486903	0.785826	0.086709	0.140578	0.18096	0.086255	0.69041	0.398477	-0.456987	-0.604199	0.084937	-0.326012	-0.292887	-0.870087	-0.325015	0.133592	-0.194904	-0.411615	-0.983297	-1.26856	0.131972	0.737791	-0.279841	-0.085603
13410622	AT2G19970	4.60224	4.55862	4.9337	4.73757	4.10933	3.63774	5.38877	4.92394	4.89783	3.93797	5.00692	4.47769	4.4361	4.57628	4.49791	4.57628	4.39668	4.20541	4.7234	4.40622	4.96625	4.33108	4.13016	4.3848	-0.166141	0.017662	-0.435795	-0.161293	0.287348	0.567671	0.786529	0.365319	-0.035875	-0.799598	0.897587	0.839951	0.287303	-0.170059	0.468338	-0.245201	-0.266526	0.179386	-0.499226	-0.535378	0.504213	0.554397	-1.16411	-0.660565
13410913	AT2G20480	5.96232	5.49434	5.2362	5.19407	4.57168	5.07504	5.20236	5.33087	5.79439	5.6723	5.38333	4.51558	5.47475	5.73357	5.25856	5.45395	4.4646	5.03938	5.63254	5.55753	5.9911	5.07705	5.26109	4.63557	-0.487574	0.239237	0.022361	0.259877	-0.107085	-0.035658	-0.759958	-0.163465	0.558189	0.478231	0.811652	-0.559461	0.157794	-0.176038	0.732541	-0.376892	0.796499	-0.403811	0.917752	-0.012573	0.174352	-0.855123	-0.015153	0.15565
13411104	AT2G20835	5.75591	5.87416	5.61419	6.0197	5.78931	5.29416	6.3563	5.76265	4.92537	5.41921	5.29097	4.50929	6.03364	6.57637	6.05899	5.48524	5.79239	5.15915	5.7013	6.01311	5.23709	5.21329	5.12946	5.0156	0.277724	0.70221	0.444805	-0.534462	0.003078	-0.135006	0.600391	-0.111506	-0.688824	-0.600489	-0.498341	-0.784871	-0.332338	-0.563258	-0.821907	-0.271946	-0.662923	-0.14355	-0.932729	-0.451752	-0.133083	0.328543	-0.164582	0.641321
13411139	AT2G20870	5.42365	4.37093	4.22749	4.72517	4.66977	4.26032	4.76489	4.58583	4.27606	4.41478	5.11622	4.55598	4.68145	4.43612	4.63583	5.32305	5.7684	4.94412	5.13276	4.63583	4.36962	4.45837	4.87619	6.1694	-0.742199	0.065194	0.40834	0.597882	1.09863	0.683799	-0.658761	0.214903	0.048569	-0.310392	0.446458	0.295667	0.451312	0.199707	-0.266207	-0.864678	-0.89221	1.22528	1.11007	-0.015196	-0.314776	-0.554286	-1.33867	0.929615
13411229	AT2G21140	8.76569	8.30964	8.11529	8.35542	8.40184	8.08014	8.15164	8.0219	7.73219	8.10096	8.68609	7.70348	7.6336	7.78597	7.61024	7.85681	7.93497	7.36243	7.41114	7.42048	7.35183	7.25135	7.49582	7.1688	-1.13209	-0.523664	-0.505058	-0.498614	-0.466873	-0.717717	-0.614057	-0.287743	-0.383103	-0.254468	0.284249	-0.376661	-0.222462	-0.365498	-0.258405	-0.605462	-0.439147	-0.193626	0.391595	-0.077755	0.124698	-0.350994	-0.723396	0.183035
13411277	AT2G21237	3.12304	3.36447	3.21056	3.22874	3.13913	3.35592	3.99248	3.18547	3.10507	3.12949	3.33838	3.25664	3.19926	3.33164	3.26805	3.59863	3.06562	3.70246	3.42908	3.33853	3.19756	3.2211	3.22262	3.18523	0.076222	-0.032824	0.057493	0.369888	-0.073512	0.346536	0.869442	-0.179001	-0.105486	-0.09925	0.199251	-0.099286	0.229823	0.006884	-0.070489	-0.377527	0.157004	-0.517227	-0.639619	0.185885	0.034997	-0.278277	-0.042247	-0.417941
13411563	AT2G22140	5.32837	4.31816	4.88199	5.20837	5.01637	5.51262	4.60563	4.35683	4.46788	5.13909	4.85126	4.80672	5.12703	5.00115	5.15091	5.39201	5.74158	5.58696	5.42011	5.07944	5.11956	5.05943	5.11956	5.39419	-0.201341	0.682983	0.268914	0.183637	0.725213	0.074338	-0.722737	0.038671	-0.414113	-0.069286	-0.165105	-0.705906	0.293082	0.078293	-0.031349	-0.332575	-0.622023	-0.192766	1.01582	0.039622	0.382764	-0.263289	-0.456918	0.51314
13411578	AT2G22160	3.54986	3.10632	3.10361	3.03986	3.15145	3.11998	2.89374	3.15945	2.80552	3.07556	3.00128	2.66211	3.33706	2.74757	3.22321	3.40584	2.57914	2.84163	3.55952	2.87237	3.53101	3.58122	3.01787	3.2801	-0.212799	-0.358752	0.119596	0.365974	-0.572309	-0.278353	-0.656119	0.053124	-0.298095	0.035701	-0.150171	-0.457875	0.222461	0.124797	0.307804	0.175387	0.438727	0.438469	0.87858	0.071673	0.605899	0.139686	0.588898	0.896344
13411698	AT2G22510	5.67248	5.87976	6.25991	5.61786	5.80381	6.41346	5.07857	6.40423	5.3254	6.13151	6.60983	6.92428	4.69667	4.61486	4.7925	4.64949	4.52241	4.58423	4.62249	4.47296	4.58986	4.50268	5.04279	4.66758	-0.975809	-1.26489	-1.46741	-0.96837	-1.2814	-1.82923	-0.593911	0.524475	-0.934509	0.513646	0.80602	0.510822	-0.074178	-0.1419	-0.202638	-0.146811	0.520378	0.08335	0.519733	-0.666375	0.731871	-0.660457	-0.285642	-0.427472
13411732	AT2G22620	4.95372	5.38985	5.10072	5.42104	5.29716	5.17165	5.76928	5.44472	5.19236	5.29784	5.26456	5.49211	5.31463	5.61953	5.41032	5.59276	5.9974	5.16937	5.22674	5.39863	5.9532	5.56785	5.0274	5.00532	0.360912	0.229684	0.309597	0.171715	0.700249	-0.002278	0.815556	0.054868	0.091633	-0.123202	-0.032594	0.320464	-0.08789	-0.220901	0.542875	-0.024911	-0.970004	-0.164048	-0.903446	-0.275769	0.451242	0.098291	-0.93741	-0.484512
13411893	AT2G23118	4.05699	4.74491	3.99692	4.17014	4.70407	5.4483	5.34268	5.07431	4.31047	4.51047	4.60547	4.26187	4.68068	4.46818	4.49645	4.65074	4.4052	4.63401	4.65405	4.5176	4.3707	4.43118	4.52421	4.92475	0.623689	-0.276723	0.499535	0.480601	-0.298871	-0.81429	1.28569	0.329399	0.313554	0.340336	-0.098599	-1.18642	-0.026629	0.04942	-0.125755	-0.219558	0.119011	0.290744	-1.31232	-0.279979	-0.439309	-0.559894	0.21761	1.47717
13411925	AT2G23250	3.15161	3.66363	3.3884	3.72547	3.88062	3.28209	3.7449	4.07095	3.51077	4.04464	3.4793	3.34382	3.72415	3.65571	3.99795	3.7766	3.2209	3.71681	4.19593	4.06527	4.13884	4.02545	3.49029	3.57687	0.572545	-0.007919	0.609541	0.051135	-0.659726	0.43472	0.593288	0.40732	0.122367	0.319166	-0.401323	0.061734	0.471782	0.409556	0.140892	0.248845	0.269396	-0.139935	-0.121506	0.002236	0.018525	-0.070321	0.670719	-0.201669
13412325	AT2G24285	3.95777	4.22685	4.4481	4.51128	3.87684	4.30573	3.16943	4.30124	3.62952	3.5749	3.96849	5.02969	4.14864	4.49179	4.54919	5.44407	4.51133	4.91317	4.24469	5.11573	4.92818	4.16009	4.56134	4.14797	0.190872	0.264934	0.101091	0.932793	0.634491	0.607441	-0.788343	0.074382	-0.818584	-0.93638	0.091644	0.723961	0.096048	0.623941	0.378989	-1.28398	0.050009	-0.765204	0.884391	0.549559	1.19757	-0.347602	-0.041635	-1.48917
13412510	AT2G24696	4.3479	3.76387	3.85171	3.71654	3.80794	3.69912	3.63809	3.73975	3.57862	3.75631	3.73975	3.91974	3.86994	3.95032	3.63003	3.95156	3.62801	3.57479	3.53371	3.47779	3.76099	3.86158	3.64881	3.58285	-0.477954	0.186455	-0.221677	0.235017	-0.179931	-0.124335	-0.709805	-0.024124	-0.273083	0.039767	-0.068198	0.22062	-0.336232	-0.472536	0.130964	-0.089986	0.020801	0.008064	0.373573	-0.448412	0.404047	-0.129753	0.088999	-0.212556
13412584	AT2G24970	6.50771	5.28468	5.73489	6.4457	6.1185	6.2568	5.86498	4.65069	6.10904	6.32548	5.68335	6.05549	5.80626	5.83923	5.90507	6.32364	6.62166	6.19514	5.30017	5.80201	6.03138	6.49499	6.01236	6.44346	-0.701452	0.554551	0.170176	-0.122056	0.503167	-0.061652	-0.642729	-0.633993	0.374143	-0.120222	-0.435142	-0.201304	-0.50609	-0.037223	0.126309	0.171344	-0.609301	0.248314	0.136639	0.59677	-0.247834	0.291566	-0.174159	0.449618
13412704	AT2G25240	3.49268	4.34936	3.94994	3.7196	3.32209	4.08639	4.12003	3.87784	4.02852	3.62596	3.96755	3.78179	4.05923	3.92073	3.59863	4.3018	3.62214	3.81677	3.88234	3.63056	4.03198	3.86547	3.84499	3.90689	0.56655	-0.428623	-0.351303	0.582207	0.300048	-0.269619	0.62735	-0.471519	0.078584	-0.093634	0.645459	-0.304604	-0.176886	-0.29017	0.433346	-0.436332	0.222855	0.090119	-0.804236	0.181349	0.354762	-0.342698	-0.422604	0.394723
13412796	AT2G25460	3.92471	3.92694	3.98401	3.61972	3.90725	3.84531	4.94172	4.20469	4.69248	4.49982	3.49738	4.65027	6.15113	6.25031	6.34668	7.56619	6.60495	6.95659	6.12078	6.07299	6.31866	7.29557	6.55712	6.88952	2.22642	2.32337	2.36268	3.94647	2.6977	3.11128	1.01701	0.277751	0.708473	0.880098	-0.40987	0.804963	-0.030348	-0.177317	-0.028026	-0.270618	-0.047826	-0.067068	-1.04736	-0.455068	-0.736499	-1.15072	0.362044	-0.872031
13413221	AT2G26400	6.77918	6.4938	5.81412	5.4698	5.51634	6.37425	5.7465	5.66454	6.62347	5.0351	9.03911	10.1022	7.13085	6.21751	7.48543	7.93861	8.05614	8.75152	7.24648	7.04981	7.73085	8.02242	9.2195	9.73811	0.351665	-0.276281	1.67131	2.46881	2.53981	2.37726	-1.03269	-0.829258	0.809347	-0.434692	3.52278	3.72795	0.115633	0.832292	0.245415	0.083811	1.16336	0.98659	1.14832	1.66155	-0.563932	0.518503	-2.35942	-2.74136
13413339	AT2G26620	3.10136	2.67435	2.67509	2.65802	3.22613	3.06653	2.01533	2.17168	2.69816	2.46053	2.54311	2.80234	2.76875	2.75768	2.94553	2.72078	2.75347	2.86862	2.67873	2.99106	3.28932	2.76178	2.68973	2.57183	-0.332611	0.083333	0.270434	0.062762	-0.472653	-0.197907	-1.08602	-0.502669	0.02307	-0.197496	-0.683018	-0.264188	-0.090013	0.23338	0.34379	0.04099	-0.06374	-0.296796	0.996009	0.736049	0.32072	0.238486	0.619278	-0.032608
13413375	AT2G26750	3.67552	3.32775	2.74044	3.42836	3.61401	3.44299	2.1515	3.53076	2.62818	2.61667	3.60499	3.21833	2.56555	2.6048	2.37216	2.69205	2.2691	2.504	2.00136	2.60209	2.4857	2.42622	2.87659	2.51534	-1.10997	-0.722946	-0.368285	-0.736307	-1.34491	-0.938983	-1.52402	0.20301	-0.112265	-0.811693	-0.009021	-0.224656	-0.564186	-0.002716	0.113543	-0.265836	0.607495	0.011334	0.959831	-0.205726	0.225808	0.545857	0.616516	0.23599
13413521	AT2G26960	4.33422	4.49991	3.99201	3.39562	3.75545	3.99121	3.65141	4.29011	3.97048	4.39071	3.53024	3.77371	4.20271	3.69066	4.41675	4.08183	3.53604	3.94785	3.93391	4.27743	3.70805	4.09163	3.94968	3.75335	-0.131512	-0.809252	0.424736	0.686205	-0.21941	-0.043366	-0.682809	-0.209798	-0.021529	0.995089	-0.225212	-0.217501	-0.268796	0.586774	-0.708697	0.009804	0.413636	-0.194499	0.414013	0.796572	-0.687168	-0.985285	0.638848	0.023002
13413571	AT2G27010	4.44812	3.9099	3.42468	3.75237	3.86457	4.27542	2.81916	4.13387	3.5126	3.5138	3.57255	4.24879	3.04007	3.67774	2.73581	3.05963	2.81737	2.76252	3.0628	2.87187	3.0699	2.76567	2.65061	2.89877	-1.40805	-0.232159	-0.688872	-0.692739	-1.04721	-1.5129	-1.62896	0.223977	0.087923	-0.23857	-0.292025	-0.026633	0.022726	-0.80587	0.33409	-0.293967	-0.16676	0.136251	1.65169	-1.02985	0.246167	-0.055397	0.125265	0.162884
13413709	AT2G27280	4.0855	4.48486	4.88995	4.59196	4.25187	4.60032	4.85749	4.49288	4.38623	4.54144	3.95686	4.56495	4.3313	4.43856	4.76039	4.27087	4.60807	5.16538	4.27337	4.21817	4.33767	4.31566	4.38009	4.1207	0.245801	-0.046294	-0.129562	-0.321094	0.356201	0.56506	0.771992	0.008023	-0.50372	-0.050526	-0.295011	-0.035374	-0.057935	-0.220392	-0.422721	0.044793	-0.227982	-1.04468	-0.829927	-0.228415	0.080999	0.095319	0.067029	-1.00931
13413775	AT2G27410	3.05658	3.07827	3.92967	3.48851	3.64296	3.85976	3.65405	3.7416	3.63593	3.73722	3.56704	3.65405	4.17276	3.88023	4.0748	3.58417	3.99551	3.56245	3.69987	3.93004	3.43677	3.59412	3.76571	3.75382	1.11618	0.801965	0.145136	0.095654	0.352556	-0.297304	0.597476	0.66333	-0.29374	0.248702	-0.075919	-0.205704	-0.472887	0.049811	-0.638028	0.009955	-0.229804	0.191367	-1.07036	-0.613519	-0.344288	-0.238747	-0.153885	0.397071
13413905	AT2G27700	3.47412	3.04143	2.48156	2.73135	2.76159	2.83723	2.77125	3.61718	2.51298	2.76319	3.04701	2.78133	3.13664	2.46286	2.71479	2.99419	2.65387	3.03922	2.70898	2.77512	3.27162	3.06663	2.72713	3.02406	-0.337481	-0.578575	0.233232	0.262843	-0.107721	0.201991	-0.702862	0.57575	0.031418	0.031839	0.285416	-0.055904	-0.427657	0.312266	0.556831	0.072434	0.073259	-0.015161	0.275205	-0.263484	0.525413	0.040595	-0.212157	0.040743
13414031	AT2G28010	3.61308	4.24012	4.56664	4.347	4.16997	3.76558	4.76861	5.09293	3.63758	4.15036	3.64306	4.64551	4.32748	4.85197	4.10796	4.18618	4.30613	4.7076	4.1735	4.21399	4.92762	4.43967	3.75292	4.47773	0.714404	0.611851	-0.458683	-0.160818	0.136166	0.942022	1.15553	0.852807	-0.929067	-0.196633	-0.526903	0.879934	-0.15398	-0.637977	0.819658	0.253488	-0.553215	-0.229877	-1.30951	-1.49078	1.74873	0.450121	-0.026312	-1.10981
13414053	AT2G28085	3.45839	3.55824	4.29353	5.78773	3.31958	3.13179	4.1795	3.79868	4.71298	4.91638	3.44861	3.62504	4.26626	3.86212	5.07658	5.71404	3.98675	3.27592	4.2272	3.99978	5.02502	6.32456	3.37437	4.45226	0.807864	0.303883	0.783054	-0.073692	0.667172	0.144129	0.721104	0.240445	0.419452	-0.871354	0.129025	0.493256	-0.039056	0.137657	-0.051566	0.610515	-0.612381	1.17634	-0.76016	-0.102788	-0.471018	1.48187	-0.741406	0.683087
13414291	AT2G28755	5.51092	5.9412	5.84589	4.62316	5.58587	4.93797	6.2959	6.63695	5.408	5.84436	5.99048	4.94957	6.54608	6.32029	5.7959	7.51117	6.74734	6.12171	6.66332	6.9783	6.34707	6.74763	7.42217	6.99489	1.03517	0.379086	-0.049996	2.88801	1.16147	1.18375	0.784981	0.695752	-0.437891	1.2212	0.404608	0.011605	0.117236	0.658017	0.551175	-0.763543	0.674835	0.873179	-0.667745	-0.037735	0.989066	-1.98474	0.270227	0.861574
13414401	AT2G28960	4.17657	3.9338	3.70768	3.7946	3.79524	4.11281	3.31697	4.68129	3.8143	4.31191	4.19848	4.3989	4.83968	5.80826	4.58148	4.92761	4.43331	4.16488	4.38331	4.90604	4.98403	4.58037	4.6522	4.74705	0.663108	1.87446	0.873805	1.13301	0.638075	0.052069	-0.859602	0.747487	0.106626	0.517313	0.403244	0.286081	-0.456374	-0.902226	0.402552	-0.347239	0.218885	0.582168	0.403228	-1.64971	0.295926	-0.864552	-0.184359	0.296087
13414471	AT2G29150	4.80215	4.34257	5.29319	4.46678	4.70347	5.0632	3.68649	5.12439	4.36584	3.50306	5.151	4.88478	5.31407	5.86681	5.37905	5.13226	5.28734	4.97917	5.20748	5.17976	5.11458	5.14733	5.57784	7.13735	0.511918	1.52425	0.085858	0.665479	0.583873	-0.084037	-1.11565	0.781815	-0.927355	-0.963713	0.447528	-0.178417	-0.106582	-0.687059	-0.264477	0.015068	0.290498	2.15818	1.00907	-1.46887	0.662878	0.978781	-0.15703	2.3366
13414539	AT2G29452	5.04111	5.85913	6.09844	5.33359	6.61495	6.11095	4.08857	4.8528	4.32503	4.19576	6.07943	6.8683	5.46633	5.57212	4.96866	6.22267	6.047	5.62322	5.35914	5.3209	5.31973	5.53905	5.75806	5.84376	0.425218	-0.287009	-1.12978	0.889085	-0.567949	-0.487733	-0.952535	-1.00633	-1.77341	-1.13782	-0.535516	0.757352	-0.107182	-0.251222	0.351075	-0.683617	-0.288936	0.220543	0.845353	0.755112	2.12448	0.454205	0.24658	-0.536809
13414556	AT2G29490	4.91136	4.60493	5.54265	5.75689	6.23224	7.27548	5.5968	5.70824	5.52388	6.24003	6.34607	7.35547	4.14103	4.80744	4.37896	4.68065	4.94436	5.49929	4.59384	4.45674	4.27579	5.22825	5.30252	5.80275	-0.770333	0.202506	-1.16368	-1.07624	-1.28787	-1.77618	0.685438	1.10331	-0.018762	0.483146	0.113835	0.079995	0.452817	-0.350694	-0.103173	0.547603	0.358157	0.303454	-0.232621	-1.454	-0.084411	0.064457	0.244322	0.223459
13414565	AT3G50840	6.05403	7.05934	6.81838	6.43728	7.07378	6.75958	6.68326	6.8723	5.85088	6.41953	6.78615	6.81047	6.60494	5.86453	6.40697	6.15657	6.27647	6.00258	6.00079	6.10011	6.58063	5.82997	6.49336	6.00886	0.55091	-1.19481	-0.411405	-0.280711	-0.797311	-0.757003	0.629236	-0.187033	-0.967498	-0.017749	-0.287637	0.05089	-0.604148	0.235575	0.173656	-0.326603	0.216888	0.006283	-1.23338	0.422608	1.14115	-0.308854	0.504525	-0.044607
13414623	AT2G29654	2.62455	3.18244	2.55749	3.06756	3.25205	3.4146	3.38395	3.07793	2.86108	2.79783	3.218	3.1522	3.445	2.75602	3.41474	3.06816	2.80184	3.11281	2.91682	3.0077	3.26584	3.09156	4.01378	3.98838	0.820448	-0.426423	0.857258	0.0006	-0.450212	-0.301788	0.759395	-0.104515	0.303588	-0.269727	-0.034054	-0.262399	-0.528185	0.251677	-0.148901	0.023403	1.21194	0.87557	-1.28758	0.356192	-0.452489	0.29313	1.246	1.13797
13414649	AT2G29790	3.24633	3.59756	2.94755	3.63056	3.63056	3.34583	4.00131	3.19385	3.43156	3.54281	3.73364	3.63862	3.96826	3.46749	4.14686	3.48949	3.86877	3.90222	3.4691	3.969	3.67261	3.79035	3.57677	3.63056	0.721932	-0.130072	1.19931	-0.141076	0.238202	0.556384	0.754978	-0.403716	0.484014	-0.087757	0.103077	0.292782	-0.49916	0.501506	-0.474244	0.30086	-0.291996	-0.271654	-1.25414	0.905222	-0.958258	0.388617	-0.395073	-0.564436
13414908	AT2G30420	4.88875	4.84641	4.60336	3.79318	3.98343	4.71486	4.09632	4.75803	4.23787	4.27063	4.32619	4.07344	3.96712	3.26676	3.29527	3.07574	3.12602	3.48405	3.57819	3.41516	3.5396	3.42956	3.50753	3.07674	-0.92163	-1.57965	-1.30809	-0.717444	-0.857409	-1.23082	-0.792434	-0.08838	-0.365491	0.47745	0.342764	-0.641424	-0.388928	0.148399	0.244326	0.353819	0.381515	-0.407307	0.403506	0.236779	0.609817	-0.123631	0.038751	0.234117
13415060	AT2G30670	3.04794	2.82027	4.05659	3.08641	2.74316	3.39281	3.75136	3.42164	3.36918	3.38373	3.97247	3.09293	3.33511	3.85364	3.18789	4.15684	4.86927	3.30848	2.92227	3.86977	3.08825	4.18253	4.39489	3.56802	0.287174	1.03337	-0.868706	1.07043	2.1261	-0.084328	0.703419	0.601366	-0.687409	0.297314	1.22931	-0.299885	-0.412841	0.016131	-0.099632	0.02568	-0.47438	0.25954	-1.11626	-0.585235	0.587777	-0.271634	-1.70369	0.559425
13415224	AT2G31018	4.6441	4.4979	4.55418	4.63121	4.83715	4.89289	5.2842	4.72209	4.10295	4.53964	4.62432	4.80341	5.26331	5.14825	4.94561	4.43582	4.69369	4.66725	5.43354	4.98123	4.84093	4.71897	4.95634	5.18992	0.61921	0.650345	0.391429	-0.195385	-0.143466	-0.225637	0.640104	0.224186	-0.451231	-0.091569	-0.212829	-0.089482	0.170236	-0.167017	-0.104684	0.283149	0.262654	0.522672	-0.469868	-0.391203	0.346547	0.374718	0.475483	0.612154
13415302	AT2G31180	4.47409	4.65895	4.25325	4.95431	4.35567	5.25861	3.77865	4.80274	4.48567	4.3894	5.4149	6.06424	4.50932	4.75099	4.62569	4.12412	5.19732	4.75099	3.9051	3.10244	4.75099	4.30772	4.47817	5.54719	0.035233	0.092045	0.372444	-0.830193	0.841655	-0.507624	-0.695437	0.143795	0.232423	-0.564909	1.05923	0.805626	-0.604226	-1.64855	0.125297	0.183608	-0.71915	0.796202	0.091211	-1.79235	-0.107126	0.748517	-1.77838	-0.009424
13415330	AT2G31250	4.16553	5.01825	4.91873	4.32602	4.15972	4.88167	4.84469	4.24179	4.01947	4.40353	4.19913	4.91	4.99285	4.57367	4.26005	4.33835	3.96963	4.32602	4.51238	4.36012	3.5713	3.88492	4.42441	4.56908	0.827312	-0.444581	-0.658684	0.012329	-0.190091	-0.555649	0.679151	-0.776465	-0.899264	0.077511	0.039409	0.028334	-0.48047	-0.213553	-0.688753	-0.453424	0.454771	0.243064	-1.15962	0.562912	0.210511	-0.530935	0.415362	0.21473
13415553	AT2G31720	5.85783	5.86494	6.3629	5.90495	6.21556	6.41581	5.05849	6.57488	5.1144	5.47079	5.7739	6.93446	5.43161	5.68796	5.91617	4.68287	5.70293	5.75461	5.90484	5.0292	4.96332	4.90201	5.93941	5.04596	-0.426221	-0.176989	-0.446729	-1.22208	-0.512632	-0.661206	-0.799342	0.709933	-1.2485	-0.434155	-0.441656	0.518647	0.473226	-0.658759	-0.952847	0.219137	0.236487	-0.708641	1.27257	-1.36869	0.295655	0.653292	0.678143	-1.22729
13415555	AT2G31725	6.87208	6.2875	6.79824	6.05671	6.05571	5.91349	6.18339	6.36697	6.66615	5.8087	5.82694	5.85101	6.43411	7.01635	6.39141	6.16257	5.90631	6.55166	6.38855	6.79417	6.79142	5.80793	6.10883	6.36941	-0.437967	0.728849	-0.406838	0.105855	-0.1494	0.638177	-0.688694	0.079466	-0.132097	-0.248009	-0.22877	-0.06248	-0.045561	-0.222178	0.400017	-0.35464	0.202526	-0.182251	0.643133	-0.301644	0.532114	-0.106631	0.431296	-0.119771
13415788	AT2G32140	3.61405	3.06149	3.13876	2.99827	3.48829	3.29999	4.25747	3.03883	3.12478	3.21085	3.74534	4.87414	3.87243	3.42359	3.02835	3.55995	3.41379	3.74124	3.72993	3.62363	3.23268	3.85435	3.6742	3.80562	0.258381	0.3621	-0.110416	0.56168	-0.074501	0.441256	0.643422	-0.022666	-0.013984	0.212581	0.257047	1.57415	-0.142497	0.200035	0.204336	0.294401	0.260405	0.064382	-0.785919	0.222701	0.21832	0.08182	0.003358	-1.50977
13415837	AT2G32360	4.6692	4.73989	4.79666	4.95444	5.01916	5.9087	3.87565	5.85172	4.49983	4.72831	4.37431	4.8577	5.17672	5.25335	4.34185	4.23784	4.53733	3.83734	5.02707	4.99254	3.92023	4.19883	4.79221	3.85013	0.507525	0.513466	-0.454818	-0.716601	-0.481828	-2.07137	-0.793547	1.11183	-0.296832	-0.226134	-0.644851	-1.051	-0.149646	-0.260811	-0.421617	-0.039013	0.254876	0.012798	0.643901	-1.37264	-0.124785	0.187121	0.899727	1.0638
13415913	AT2G32590	7.36964	6.06617	6.42256	6.96335	6.99756	6.83486	6.69345	6.30037	6.28592	6.37189	6.8398	6.47535	7.00328	6.88035	6.96335	7.82118	7.73821	7.4929	7.30493	6.91373	7.23757	7.09926	6.9713	7.19289	-0.36636	0.81418	0.540797	0.857829	0.74065	0.658038	-0.676193	0.234197	-0.136635	-0.591461	-0.157765	-0.359515	0.301648	0.033377	0.274212	-0.721924	-0.766914	-0.300013	0.977841	-0.20082	0.410847	-0.130463	-0.609149	0.059502
13416425	AT2G33560	6.26531	5.72874	5.73007	5.89351	6.07266	6.46191	5.66877	5.93916	5.36441	5.51145	6.22826	5.52145	6.17063	6.03818	5.87294	6.60354	6.54547	6.22454	5.71178	5.55842	5.6691	6.67502	6.14759	6.18368	-0.094673	0.309438	0.142878	0.71003	0.472812	-0.237365	-0.596534	0.210416	-0.365655	-0.382062	0.155606	-0.940457	-0.45885	-0.479761	-0.203847	0.071477	-0.397881	-0.040863	0.137684	-0.690177	0.161808	0.453539	-0.553487	0.899594
13416460	AT2G33710	4.32123	4.063	4.11839	4.21673	4.41882	3.9493	4.91024	4.27539	4.21279	4.33755	3.93516	3.63038	4.77834	4.34752	4.38464	4.59996	4.7373	4.1326	5.22561	4.91218	4.60196	5.08169	4.17056	4.80178	0.457109	0.284515	0.266243	0.383228	0.318482	0.183307	0.589013	0.212386	0.094399	0.120823	-0.483653	-0.318911	0.447267	0.564657	0.217322	0.481734	-0.566736	0.669173	-0.141746	0.352271	0.122923	0.360911	-0.083083	0.988084
13416506	AT2G33796	4.13264	4.98318	5.65231	4.39647	4.22199	5.82952	5.07663	5.51066	4.73272	4.85886	5.41767	5.60309	4.53671	5.16465	5.60468	5.39653	4.95732	5.10823	5.01743	4.90866	4.47034	4.94833	5.20986	4.49763	0.404062	0.181473	-0.047628	1.00006	0.735333	-0.721297	0.943983	0.527482	-0.919588	0.462399	1.19568	-0.226438	0.480723	-0.255994	-1.13434	-0.448203	0.252542	-0.610599	-0.46326	-0.783476	-0.214749	-0.910602	-0.943135	-0.384161
13416545	AT2G33850	8.81438	8.34016	8.09612	8.09313	8.26436	8.08642	7.8093	7.98628	7.95127	8.03262	9.01125	8.19663	5.53849	6.0273	6.0073	6.02511	6.04774	6.03837	5.75407	5.64431	6.20469	6.10357	6.06382	5.91897	-3.27589	-2.31286	-2.08882	-2.06802	-2.21662	-2.04805	-1.00508	-0.353876	-0.144851	-0.060506	0.746893	0.110204	0.215585	-0.382991	0.197393	0.078457	0.016088	-0.119402	1.22066	-0.029115	0.342244	0.138963	-0.730805	-0.229606
13416959	AT2G34850	2.94597	4.20178	4.10657	4.30246	4.69805	5.81415	3.6108	4.56218	4.17363	4.23661	5.19423	5.53082	4.702	4.85814	5.09663	4.58074	5.71589	5.94899	4.65895	4.38526	5.00586	4.72003	5.54099	5.64324	1.75603	0.656354	0.990054	0.278281	1.01784	0.134842	0.664833	0.360396	0.067064	-0.065851	0.496184	-0.28333	-0.043049	-0.472875	-0.090762	0.139292	-0.174895	-0.305747	-0.707882	-0.833271	-0.157826	0.205143	-0.671079	-0.022417
13417199	AY707462	7.00845	6.60491	6.17161	6.13483	6.237	6.64278	6.08113	6.24594	6.46881	6.21028	6.28725	6.7	5.20143	6.06417	5.44157	5.0585	4.61458	5.49798	4.62443	5.14457	5.07482	4.77045	5.33605	5.52979	-1.80702	-0.540743	-0.730039	-1.07633	-1.62242	-1.1448	-0.927317	-0.358973	0.297205	0.075452	0.050246	0.057224	-0.576997	-0.919599	-0.366747	-0.288046	0.721464	0.031814	0.35032	-0.560626	-0.663952	-0.363498	0.671218	-0.02541
13417367	AJ242536	7.35691	7.59316	7.50908	6.68933	6.61133	7.24641	6.71215	6.80628	7.45613	6.38615	6.93653	5.78998	7.62593	7.85508	8.28056	7.92436	7.75592	7.94834	7.63179	8.11405	8.6167	7.4466	8.21759	7.92764	0.269025	0.261917	0.771485	1.23503	1.14459	0.701933	-0.644756	-0.786877	-0.052947	-0.303179	0.325201	-1.45642	0.005855	0.258971	0.33614	-0.477759	0.461673	-0.020702	0.650611	1.04585	0.389087	-0.17458	0.136472	1.43572
13417725	AT2G36660	5.83717	5.37378	4.86676	5.44199	5.10343	5.60114	4.7911	5.20879	5.24931	5.02136	5.51229	4.92994	5.1794	5.24007	5.60528	5.41857	5.39038	5.04365	4.75056	5.25321	5.27406	5.22663	5.22092	4.91462	-0.65777	-0.13371	0.738522	-0.023416	0.286942	-0.557491	-1.04608	-0.164982	0.382556	-0.420633	0.408857	-0.671203	-0.428848	0.013145	-0.331221	-0.191941	-0.169459	-0.129037	0.617229	0.178127	-0.713777	0.228692	-0.578316	0.542166
13417766	AT2G36710	4.49682	4.28768	4.3256	4.5922	4.33001	4.21167	3.86778	4.40985	4.15005	3.90507	4.42055	4.32203	4.76329	5.19096	5.63682	4.49927	5.18548	5.47351	4.8334	4.65791	4.72963	4.36351	4.70866	5.03413	0.266467	0.903285	1.31122	-0.092933	0.85547	1.26184	-0.629037	0.122171	-0.175544	-0.68713	0.090537	0.110357	0.07011	-0.533049	-0.907193	-0.135752	-0.476825	-0.439385	0.699147	-0.65522	-0.731649	0.551378	-0.567362	-0.549742
13417972	AT2G36985	5.69531	3.78889	3.31221	4.02142	4.47557	4.58785	4.76447	3.90495	3.89384	3.68103	4.22089	3.73037	4.01202	4.40488	3.98338	4.09994	4.00211	3.87088	4.28784	4.51306	3.87045	4.3373	4.04474	3.88135	-1.68329	0.615985	0.671164	0.078522	-0.473456	-0.71697	-0.930843	0.116057	0.581624	-0.340381	-0.254677	-0.857477	0.275817	0.108183	-0.112929	0.237359	0.04263	0.010466	1.20666	-0.007874	-0.694553	0.57774	0.297307	0.867943
13418421	AT2G38060	5.90676	5.50361	5.65813	5.44291	5.57203	5.48186	6.71399	5.93689	5.41456	5.3709	5.07506	4.88741	5.72576	5.50349	5.47023	6.30592	5.55223	4.98349	6.11359	5.07312	6.06109	5.14	5.36003	5.39362	-0.181005	-0.000121	-0.187906	0.863008	-0.019802	-0.498376	0.807226	0.433287	-0.243571	-0.072013	-0.496967	-0.594454	0.387836	-0.430366	0.590868	-1.16592	-0.192195	0.410133	-0.41939	-0.863653	0.834439	-1.0939	0.304772	1.00459
13418455	AT2G38160	4.96493	3.94141	4.48537	4.5143	4.88124	4.10013	4.14239	4.1181	4.13026	3.61205	4.31079	4.36545	4.13983	4.09947	4.80963	5.33823	4.95482	5.234	4.13521	4.42687	4.76948	5.10633	4.87392	4.26258	-0.825091	0.158059	0.324261	0.823933	0.073574	1.13387	-0.822531	0.176695	-0.355102	-0.90225	-0.570454	0.265316	-0.00462	0.327403	-0.040151	-0.231902	-0.080896	-0.971428	0.817911	0.150708	0.314951	0.670348	0.489558	-1.23674
13418537	AT2G38304	4.78962	4.90444	4.42744	5.44599	4.39156	4.42968	3.83742	5.02264	4.00862	4.33289	4.5473	5.14632	4.28106	4.34068	4.25225	4.56691	3.75067	4.9417	4.88555	4.458	4.13455	4.34863	4.4352	4.28572	-0.508567	-0.563757	-0.175189	-0.87908	-0.640896	0.512018	-0.952202	0.118203	-0.418816	-1.1131	0.155736	0.716635	0.604498	0.117315	-0.117704	-0.218278	0.684533	-0.655977	1.5567	-0.000888	0.301112	0.894824	0.528797	-1.37261
13418754	AT2G38910	4.79526	5.30946	5.35557	4.37153	5.25452	5.5491	3.98465	6.1169	4.56585	4.72843	4.4967	5.37262	4.68996	4.72843	4.88531	5.24983	5.03817	4.67814	4.92563	4.48012	4.21638	3.56958	5.20749	4.83509	-0.105301	-0.581035	-0.470259	0.878292	-0.216344	-0.870955	-0.810612	0.807442	-0.789715	0.356893	-0.75782	-0.176478	0.235668	-0.248307	-0.668931	-1.68025	0.169316	0.156954	1.04628	-1.05575	0.120784	-2.03714	0.927136	0.333432
13419067	AT2G39590	4.56959	4.32783	4.47763	4.53467	4.54042	4.88296	3.47889	4.45139	4.57105	4.17295	4.18544	4.20701	4.85908	4.7674	4.0429	4.68656	3.69609	3.84241	4.34788	3.87487	3.68935	3.89581	4.40586	4.07343	0.28949	0.43957	-0.434727	0.151886	-0.844327	-1.04055	-1.0907	0.12356	0.093422	-0.361722	-0.354976	-0.675954	-0.511201	-0.892523	-0.353554	-0.790745	0.709774	0.231023	0.579499	-1.01608	-0.446976	-0.429023	1.06475	0.906977
13419142	AT2G39800	8.51081	9.54495	9.74484	9.94783	11.22	11.6542	9.36517	9.47807	9.18675	9.80017	11.1512	11.4562	9.28852	9.87804	10.1608	10.5523	10.6728	11.3596	9.41682	9.87185	9.89025	10.2527	10.5842	11.0505	0.777711	0.333087	0.415997	0.604489	-0.54719	-0.29465	0.854362	-0.066883	-0.558094	-0.147661	-0.0688	-0.19801	0.1283	-0.006182	-0.270593	-0.2996	-0.08857	-0.30902	-0.726062	0.060701	0.287501	-0.151939	-0.01977	-0.11101
13419199	AT2G39920	8.20528	9.48969	8.56379	8.00854	6.44405	8.01225	9.0445	9.26614	8.54877	7.904	7.17732	8.19803	8.00117	9.38167	8.67391	8.10492	6.82896	7.946	8.20015	9.34771	8.49713	7.92514	7.21853	8.17076	-0.204111	-0.108024	0.110121	0.096379	0.384911	-0.066245	0.839221	-0.223551	-0.015018	-0.104539	0.733272	0.185786	0.198983	-0.033965	-0.176778	-0.179778	0.389571	0.224759	-0.640238	0.189586	-0.16176	-0.075239	-0.343701	0.038973
13419286	AT2G40085	6.05166	6.59473	7.35268	6.96533	4.99497	4.58045	5.45847	5.79778	7.53847	6.84463	5.44576	4.7639	5.46382	6.96023	7.86249	6.99598	5.30508	5.5692	5.37328	6.7696	7.38177	7.03867	5.55459	5.38317	-0.587841	0.365499	0.509817	0.030649	0.310108	0.988757	-0.593189	-0.79695	0.185789	-0.120703	0.450792	0.183451	-0.090539	-0.190621	-0.480724	0.042688	0.249513	-0.186031	0.50265	0.606329	-0.666513	0.163391	-0.201279	-0.369482
13419309	AT2G40170	4.48824	4.74266	4.41028	4.10255	4.68713	4.62589	5.14181	4.43851	4.40411	4.57698	4.22661	4.45086	4.62792	4.52736	4.90676	4.16259	4.38079	4.31854	4.31295	4.85369	4.55028	4.68692	4.27725	4.10686	0.13968	-0.215301	0.496486	0.060039	-0.306338	-0.307351	0.65357	-0.304154	-0.006164	0.474435	-0.460516	-0.17503	-0.314973	0.32633	-0.356489	0.524328	-0.103542	-0.21168	-0.968543	0.630484	-0.350325	0.049893	0.356974	-0.03665
13419379	AT2G40340	5.00243	7.27118	7.63868	4.4942	4.78216	4.58588	5.84187	7.49976	7.58627	4.42765	4.49156	5.11664	5.10143	6.07238	6.9781	4.36911	3.86742	3.80254	5.67423	6.84442	7.07856	4.15009	4.82844	4.2233	0.098994	-1.19881	-0.66058	-0.125086	-0.914742	-0.783336	0.839432	0.228581	-0.052411	-0.066546	-0.290599	0.530757	0.572801	0.77204	0.100458	-0.219022	0.961023	0.420758	-0.266631	0.543459	0.152869	-0.152476	1.25162	-0.109999
13419744	AT2G41225	3.64907	4.03272	3.28176	3.47135	3.4067	3.45072	4.84416	4.2126	3.62062	3.34743	3.64907	3.38609	3.59811	3.96819	4.24637	3.55804	4.12157	3.57721	3.64667	3.37009	3.48319	3.75543	3.85982	3.93122	-0.050964	-0.064531	0.964616	0.086694	0.714874	0.126485	1.19509	0.179887	0.338858	-0.123923	0.242372	-0.064634	0.04856	-0.598101	-0.763184	0.197381	-0.261753	0.354015	-1.14653	-0.777988	-1.10204	0.321304	-0.504125	0.418649
13419828	AT2G41480	5.20497	4.72933	4.37255	4.89505	5.27259	4.32188	4.60775	4.98529	4.9178	4.94246	4.94246	4.47732	4.94246	5.91041	5.15027	4.76141	5.38493	4.90091	4.45931	5.45984	5.00935	4.78774	4.87991	4.78643	-0.262508	1.18108	0.777713	-0.133643	0.112343	0.579025	-0.597222	0.255964	0.545247	0.04741	-0.330129	0.15544	-0.483152	-0.450577	-0.140916	0.026337	-0.505023	-0.114479	0.11407	-0.706541	-0.686163	-0.021073	-0.174894	-0.269919
13420114	AT2G41860	3.65129	3.24427	3.46434	3.33948	3.53515	3.20962	3.07558	3.32968	3.10898	3.33732	3.49818	3.57881	3.4684	3.91939	3.50409	3.62019	3.51686	3.53498	3.72782	3.35971	3.669	3.70445	3.46367	3.49467	-0.182893	0.675119	0.039746	0.280709	-0.018289	0.325355	-0.575717	0.085417	-0.355361	-0.00216	-0.036973	0.36919	0.259423	-0.559673	0.164908	0.08426	-0.053193	-0.040309	0.83514	-0.64509	0.520269	0.08642	-0.01622	-0.409499
13420259	AT2G42180	3.95862	3.45045	3.5346	3.48323	3.35156	3.42264	3.20399	4.36972	2.94945	4.16153	3.28039	3.87629	3.38879	3.0088	3.09672	3.09462	3.50147	3.1588	3.13241	3.0827	3.06892	2.96557	3.16211	3.27997	-0.569825	-0.441652	-0.437884	-0.388615	0.149913	-0.263844	-0.754624	0.919267	-0.585153	0.678305	-0.071165	0.453644	-0.256378	0.073898	-0.027804	-0.129049	-0.339365	0.121176	0.498246	-0.845369	0.557349	-0.807354	-0.2682	-0.332468
13420425	AT2G42530	5.33069	6.70024	4.80792	4.41689	4.69162	6.51868	6.29842	5.53495	4.60432	4.96585	5.114	6.78322	4.76065	5.87817	4.62632	4.73641	3.86945	5.03492	5.16308	5.27321	4.89043	4.45393	4.10047	4.90639	-0.570042	-0.82207	-0.181601	0.319516	-0.822173	-1.48377	0.967726	-1.16529	-0.203597	0.54896	0.422382	0.264538	0.402434	-0.604965	0.264113	-0.282479	0.231027	-0.128529	-0.565292	0.56033	0.46771	-0.831439	-0.191355	-0.393067
13420612	AT2G42955	4.00494	3.94574	4.1523	4.21615	3.39597	4.0226	4.90309	3.83161	3.97073	4.04296	3.58409	3.3837	4.10498	4.36527	4.50202	4.67554	4.16804	4.2259	3.79718	4.32692	4.94785	4.10537	4.04097	3.95567	0.100033	0.419532	0.349717	0.459394	0.772063	0.203293	0.898151	-0.114126	-0.181568	-0.173187	0.188115	-0.638901	-0.3078	-0.038348	0.445836	-0.570173	-0.127066	-0.270225	-1.20595	0.075778	0.627404	-0.396986	-0.315181	0.368676
13420882	AT2G43600	2.79743	3.09581	3.93459	4.04949	3.16909	3.50643	3.40289	4.18487	3.1657	3.40433	3.26215	2.88209	3.22755	2.92573	3.09788	2.99511	3.78632	3.58364	3.20084	3.14085	4.14883	3.65577	3.32978	3.05961	0.430118	-0.170075	-0.836711	-1.05437	0.617229	0.077204	0.605461	1.08907	-0.768883	-0.645154	0.093058	-0.62434	-0.02671	0.215116	1.05096	0.66066	-0.456544	-0.524022	-0.632171	-0.873951	1.81984	1.30581	-0.549602	0.100318
13421100	AT2G44070	4.82778	3.27471	4.14378	3.01388	2.98025	3.23114	3.99219	3.94319	4.03019	3.02108	3.11479	3.71007	4.72043	3.96307	3.43954	3.48026	3.82324	3.55257	4.55293	4.08877	3.76201	3.57421	3.21716	3.34018	-0.107349	0.688363	-0.70424	0.466385	0.842988	0.321432	-0.835582	0.668479	-0.113591	0.007207	0.134539	0.478938	-0.167502	0.1257	0.322469	0.093947	-0.60608	-0.212387	0.66808	-0.542779	0.43606	0.08674	-0.740619	-0.691325
13421162	AT2G44198	3.52	4.39527	4.53289	5.18981	4.29188	5.17486	4.93251	4.56665	4.25338	3.86379	3.72306	4.85433	4.87432	3.54669	3.97869	3.85711	4.16325	4.41919	4.3024	3.28713	3.77939	3.78009	4.24647	4.29497	1.35432	-0.848587	-0.554199	-1.3327	-0.128637	-0.755674	1.41252	0.171375	-0.279506	-1.32601	-0.568828	-0.320532	-0.571919	-0.259559	-0.199296	-0.077023	0.083219	-0.124222	-1.98443	-0.430934	0.08021	1.24899	0.652047	0.19631
13421221	AT2G44380	5.9428	4.98407	4.10693	3.96815	5.6149	5.81811	6.6261	4.47997	6.28555	5.16263	6.8462	6.86771	7.47103	7.50498	7.85208	7.84707	9.06757	8.67469	7.90279	7.92924	7.76398	7.99898	9.16875	8.28042	1.52823	2.52091	3.74516	3.87893	3.45266	2.85657	0.683298	-0.504098	2.17862	1.19449	1.2313	1.0496	0.431758	0.424253	-0.088105	0.151907	0.10118	-0.394262	-0.25154	0.928351	-2.26673	-1.04258	-1.13012	-1.44386
13421392	AT2G44910	4.9061	4.51811	4.64818	4.46316	4.5974	4.94255	5.52331	4.59347	4.85245	4.37394	5.18028	4.94184	4.78176	4.69147	6.14061	5.42741	6.10908	5.62173	5.39634	5.06917	5.18208	5.72758	5.31944	6.05973	-0.124334	0.173356	1.49243	0.964252	1.51168	0.679179	0.617211	0.075358	0.204264	-0.08922	0.582885	-0.000711	0.614577	0.3777	-0.958534	0.300169	-0.789642	0.437999	-0.002634	0.302342	-1.1628	0.389389	-1.37253	0.43871
13421576	AT2G45410	3.7669	3.72567	3.56744	3.55606	3.75742	3.66106	4.97487	3.86161	3.93022	3.6176	4.20534	3.64929	4.0272	3.85237	4.77668	3.64712	3.98606	4.46058	3.974	4.08877	3.3305	3.66509	3.88674	4.04395	0.260302	0.126703	1.20925	0.091057	0.228647	0.799518	1.20797	0.135939	0.362787	0.061539	0.447922	-0.011772	-0.053201	0.236401	-1.44619	0.01797	-0.099319	-0.416628	-1.26117	0.100462	-1.80897	-0.043569	-0.547241	-0.404856
13421862	AT2G46040	7.08654	6.82323	6.67329	7.16099	6.73653	7.32391	6.34039	6.85502	6.95207	6.98548	6.88161	7.18059	7.35038	7.23217	7.36739	7.97065	7.57523	7.74008	7.34271	7.43372	7.7544	7.88579	7.57267	7.63215	0.263844	0.408934	0.694098	0.809658	0.838708	0.41617	-0.746152	0.03179	0.278782	-0.175518	0.145088	-0.143324	-0.007668	0.201552	0.387009	-0.084864	-0.002564	-0.107931	0.738484	0.169762	0.108227	0.090654	-0.147652	0.035393
13422156	AT2G46760	4.15714	4.83044	4.43953	4.92311	5.11484	5.02926	4.81907	5.30084	4.60996	4.69858	4.90406	5.33969	4.20608	4.82991	4.26005	4.87696	4.95395	4.77059	3.71688	4.4041	4.76391	3.81219	5.40103	5.0997	0.048939	-0.00053	-0.17948	-0.046149	-0.16089	-0.258668	0.661932	0.470401	0.170435	-0.224533	-0.210777	0.310439	-0.489202	-0.425809	0.503856	-1.06477	0.447078	0.329109	-1.15113	-0.89621	0.333421	-0.840237	0.657855	0.01867
13422256	AT2G46995	4.27698	4.65252	4.66593	4.66877	4.36822	4.46823	5.04187	6.05627	4.41601	5.16266	4.5187	4.01742	5.57146	4.64071	4.07824	4.912	4.56768	4.2133	5.15986	4.76203	4.61108	4.24179	4.55517	3.96474	1.29448	-0.011812	-0.587693	0.24323	0.199453	-0.254931	0.76489	1.40375	-0.249922	0.493892	0.150474	-0.45081	-0.411599	0.121315	0.532841	-0.670204	-0.012506	-0.248561	-1.17649	-1.28243	0.782763	-1.1641	-0.16298	0.202249
13422444	AT2G47560	4.60733	4.57481	4.33972	4.36452	6.13718	4.3467	5.41967	4.64705	4.31647	3.8901	5.43838	4.32602	5.01643	5.30416	4.72957	4.78156	6.51759	5.25045	5.57964	4.96296	5.1934	4.46492	5.36513	5.09871	0.409099	0.729352	0.389847	0.417048	0.38041	0.903759	0.812338	0.072246	-0.023249	-0.474414	-0.698801	-0.020679	0.563205	-0.341196	0.463832	-0.316644	-1.15247	-0.151748	-0.249133	-0.413442	0.487081	0.15777	-0.453665	-0.131069
13422448	AT2G47570	2.93459	3.46767	3.63759	3.38289	3.31404	3.60049	3.59733	3.22491	3.28239	3.49038	3.21716	3.09593	3.56532	3.61685	3.64664	3.51672	3.3755	3.49342	3.94258	3.54049	3.64761	3.56372	3.33611	3.33029	0.630731	0.149172	0.009044	0.133828	0.061456	-0.107065	0.662737	-0.24276	-0.355204	0.107489	-0.096883	-0.504557	0.377254	-0.076358	0.000977	0.047002	-0.03939	-0.163133	-0.285483	0.166402	0.356181	-0.060487	0.057493	0.341424
13422716	AT3G01080	5.26094	4.49095	4.80354	5.39847	5.24137	4.76664	4.45993	5.13482	5.5391	5.24446	6.14769	6.70484	6.37447	6.36651	7.27749	7.44464	7.18853	7.34901	6.27408	7.1757	7.34398	7.30381	7.62656	7.52156	1.11353	1.87556	2.47395	2.04616	1.94715	2.58237	-0.801006	0.643867	0.735564	-0.154011	0.906319	1.93819	-0.100385	0.809195	0.066488	-0.140824	0.438035	0.172545	0.700621	0.165328	-0.669076	0.013187	-0.468284	-1.76565
13422904	AT3G01600	4.02809	3.74611	4.20155	4.11518	4.11828	4.68012	4.83123	4.48001	4.54687	4.79138	4.58253	4.5189	4.46144	5.02828	4.41169	4.14741	4.71808	4.54687	4.96099	4.62593	4.54687	4.9596	4.68476	4.78491	0.43335	1.28217	0.21014	0.032228	0.5998	-0.133249	0.80314	0.733901	0.345315	0.676199	0.464251	-0.161218	0.499548	-0.40235	0.135175	0.812191	-0.033318	0.23804	-0.303592	-1.13625	-0.21014	0.135992	-0.497569	0.399258
13422994	AT3G01750	5.37212	5.20032	5.55982	5.80964	4.98545	5.2998	4.55149	5.34832	5.24103	5.58001	5.04717	4.95764	5.2744	5.4211	5.55681	5.74615	5.0747	5.04376	5.53988	5.50844	5.73863	5.86367	4.9874	5.20728	-0.097721	0.220783	-0.003016	-0.063488	0.089245	-0.256043	-0.820629	0.147998	-0.318793	-0.229629	0.061716	-0.342158	0.265482	0.087334	0.181822	0.117525	-0.087297	0.163524	1.08611	-0.060664	0.500615	0.347154	-0.149013	0.505682
13423077	AT3G01950	7.11051	7.20275	7.07846	7.32265	6.84081	6.69123	6.43781	6.94337	6.62087	7.44322	6.62087	5.84459	6.31783	6.41528	6.40202	6.50659	6.65263	6.15716	6.20179	6.15988	6.26726	6.33096	6.49171	6.24194	-0.792686	-0.787462	-0.676444	-0.816059	-0.188181	-0.534068	-0.672702	-0.259377	-0.457596	0.120574	-0.219943	-0.846639	-0.116032	-0.2554	-0.134757	-0.175636	-0.160919	0.08478	0.55667	0.003977	0.322839	-0.29621	0.059024	0.931419
13423174	AT3G02120	6.66384	6.03145	5.71593	6.11733	5.67669	6.11325	6.06412	5.58751	5.54007	5.76354	5.66176	4.98691	6.59715	6.03784	6.06325	6.46219	6.16071	6.51096	6.75618	6.18462	5.9933	6.79336	6.45355	6.26059	-0.066693	0.006395	0.347319	0.344851	0.48402	0.397713	-0.599716	-0.44394	-0.175859	-0.353796	-0.014931	-1.12634	0.159037	0.146778	-0.069949	0.331172	0.292845	-0.250369	0.758753	0.590718	0.10591	0.684968	0.307776	0.87597
13423272	AT1G06480	3.33524	3.09723	4.32096	3.89791	4.90126	3.46694	4.02129	4.16561	3.15078	3.36823	3.33156	4.65867	3.67562	3.82429	4.21585	4.00814	4.28237	3.84665	4.20483	3.32793	3.56066	3.63762	4.17625	4.41249	0.340381	0.727059	-0.105113	0.110233	-0.618888	0.37971	0.686055	1.06838	-1.17018	-0.529685	-1.5697	1.19173	0.529213	-0.496368	-0.655184	-0.370523	-0.106123	0.565836	-0.156842	-1.56475	0.514992	0.159162	1.46358	-0.625899
13423766	AT3G03430	4.52593	5.27181	5.16996	5.65065	5.12314	5.03931	5.11819	5.24582	5.22808	5.35972	4.81335	4.99984	6.03021	5.68528	5.75941	5.26815	5.40071	5.93349	6.10403	6.00967	5.64985	5.88031	5.42023	5.78869	1.50428	0.413466	0.589451	-0.3825	0.277575	0.894179	0.592262	-0.025991	0.058119	-0.290934	-0.30979	-0.039462	0.073814	0.324388	-0.109563	0.612159	0.019516	-0.144799	-0.518448	0.350379	-0.167682	0.903093	0.329306	-0.105337
13424064	AT3G04250	2.73875	2.85368	2.68922	2.67539	2.85363	2.82475	3.41126	2.84041	2.76729	3.11345	2.72356	2.98139	3.30506	3.3457	2.97762	3.2423	3.25353	3.25003	3.04012	3.59514	3.23145	2.67723	2.76286	2.80916	0.566317	0.492019	0.288403	0.566911	0.399905	0.425277	0.672513	-0.013279	0.078068	0.438062	-0.130071	0.156642	-0.264944	0.249439	0.253825	-0.565068	-0.490668	-0.440863	-0.937457	0.262718	0.175757	-1.00313	-0.360597	-0.597505
13424181	AT3G04525	4.32336	4.75951	4.69363	4.65527	4.78611	4.4722	5.07873	5.21494	4.61032	4.48808	4.6999	4.50826	5.18643	4.40026	5.60004	4.80414	4.74862	5.32664	5.18644	4.84772	4.63717	4.20471	5.1616	4.75474	0.863068	-0.359258	0.906411	0.148865	-0.03749	0.854435	0.755374	0.455422	-0.083311	-0.167194	-0.086209	0.036051	1.9e-05	0.447464	-0.962874	-0.599427	0.412979	-0.571895	-0.755355	-0.007958	-0.879563	-0.432233	0.499188	-0.607946
13424583	AT3G05400	4.36376	5.11848	5.24326	6.23203	5.4324	5.87284	4.95209	5.12156	5.10858	6.00968	5.53675	6.16436	4.78002	4.77252	5.14624	5.19554	5.58707	5.57078	4.66042	4.88015	5.53837	5.32432	5.06052	6.20025	0.416262	-0.345965	-0.097016	-1.03649	0.154667	-0.302057	0.588333	0.003077	-0.134682	-0.222349	0.104346	0.291517	-0.119601	0.107633	0.392133	0.128783	-0.526548	0.629464	-0.707934	0.104556	0.526815	0.351132	-0.630894	0.337947
13424865	AT3G05858	2.15782	2.52228	2.51813	2.79328	3.11452	2.50479	2.74907	2.93676	2.78435	2.26631	2.73312	2.73068	2.97831	2.90114	2.80743	3.31578	2.68718	3.13351	2.52713	2.80761	3.14182	2.42605	2.50839	2.36782	0.820498	0.378856	0.289304	0.522503	-0.427338	0.628714	0.59125	0.414482	0.266219	-0.526963	-0.381399	0.225891	-0.451187	-0.09353	0.334385	-0.889727	-0.17879	-0.765691	-1.04244	-0.508012	0.068166	-0.362764	0.202609	-0.991582
13424892	AT3G06020	5.94139	5.00519	5.47969	5.11041	5.78971	5.68181	5.33605	5.55272	5.1336	5.03702	5.7164	5.82763	5.66657	5.71605	5.26931	4.76071	5.47203	5.93561	5.40759	5.34634	5.3689	4.80632	5.65776	5.85821	-0.274822	0.71086	-0.210379	-0.349696	-0.317676	0.2538	-0.60534	0.547529	-0.346089	-0.073392	-0.073309	0.145816	-0.258978	-0.369711	0.099591	0.04561	0.185725	-0.077396	0.346362	-0.91724	0.44568	0.119002	0.259034	-0.223212
13425312	AT3G50840	6.05403	7.05934	6.81838	6.43728	7.07378	6.75958	6.68326	6.8723	5.85088	6.41953	6.78615	6.81047	6.60494	5.86453	6.40697	6.15657	6.27647	6.00258	6.00079	6.10011	6.58063	5.82997	6.49336	6.00886	0.55091	-1.19481	-0.411405	-0.280711	-0.797311	-0.757003	0.629236	-0.187033	-0.967498	-0.017749	-0.287637	0.05089	-0.604148	0.235575	0.173656	-0.326603	0.216888	0.006283	-1.23338	0.422608	1.14115	-0.308854	0.504525	-0.044607
13425334	AT3G07070	3.31706	3.84657	3.62919	3.57459	3.44289	3.79835	4.04209	3.88766	3.75611	3.9433	3.40848	3.40637	3.80559	3.75654	3.49181	3.84657	3.66562	4.02451	3.87786	3.73841	3.88116	4.19466	3.44211	3.88458	0.488521	-0.090021	-0.137376	0.271973	0.222723	0.226153	0.725021	0.04109	0.12692	0.368708	-0.034414	-0.391984	0.072275	-0.018139	0.389344	0.348094	-0.223508	-0.139922	-0.652746	-0.059229	0.262424	-0.020614	-0.189094	0.252062
13425376	AT3G07185	3.24086	3.22822	3.06135	3.41682	3.14948	3.03195	2.65052	3.09538	3.24083	3.13518	2.85557	3.17472	4.06888	3.34273	3.20141	3.48026	3.63701	3.29914	3.48825	3.24086	3.36306	3.4328	3.2442	3.35111	0.828019	0.114516	0.140052	0.063446	0.487525	0.267187	-0.590334	-0.132837	0.179473	-0.281631	-0.293911	0.142766	-0.580623	-0.101877	0.161656	-0.047467	-0.392807	0.051967	0.009711	0.03096	-0.017817	0.234164	-0.098896	-0.090799
13425402	AT3G07260	3.41463	4.13438	4.38111	4.23008	3.91539	3.90655	4.21245	4.46271	2.97814	3.77294	4.16364	4.20446	4.52912	4.12413	4.2258	4.38367	4.1585	4.31391	4.03055	4.03055	3.94127	3.42944	4.25388	4.10772	1.11449	-0.01025	-0.155309	0.153592	0.24311	0.407364	0.797821	0.328324	-1.40298	-0.457136	0.248252	0.297918	-0.498566	-0.093583	-0.284535	-0.954237	0.095379	-0.206188	-1.29639	-0.421907	1.11844	-0.497101	-0.152873	-0.504106
13425793	AT3G08636	3.28876	3.40995	3.39828	3.60293	3.94106	4.18632	3.90201	4.34491	3.53864	3.36173	3.84144	3.90554	3.55521	3.34879	3.65361	3.60523	3.48497	3.81058	4.14649	3.77826	3.62007	3.74992	3.3309	3.89189	0.266453	-0.061161	0.255331	0.002305	-0.456089	-0.375739	0.613256	0.93496	0.140361	-0.241195	-0.099616	-0.280777	0.591276	0.429473	-0.033536	0.144687	-0.154064	0.081312	-0.02198	-0.505487	-0.173897	0.385882	-0.054448	0.362089
13425827	AT3G08700	4.11443	5.00446	4.71159	4.57409	4.2781	5.07935	4.80915	4.91712	5.15433	4.3186	4.77026	4.56367	5.23635	4.54015	4.57933	4.77967	4.53026	4.3849	4.67602	4.55621	4.70718	4.63116	4.63116	4.18808	1.12193	-0.464315	-0.132251	0.205575	0.252164	-0.694453	0.694721	-0.087347	0.442749	-0.255486	0.492164	-0.51568	-0.560337	0.016061	0.12785	-0.148509	0.100896	-0.196819	-1.25506	0.103408	-0.314899	0.106977	-0.391268	0.318861
13426098	AT3G09520	5.01565	5.07504	5.02897	5.46652	5.61019	5.61019	5.67287	5.17451	5.14351	5.49421	5.68818	5.79045	6.08084	5.42512	5.10545	5.78871	5.24755	5.76377	6.25425	5.7491	5.81539	6.00283	5.76097	6.47528	1.06519	0.350082	0.076479	0.322194	-0.362636	0.153585	0.657219	0.099466	0.114537	0.027688	0.07799	0.180264	0.173411	0.32398	0.70994	0.214117	0.513417	0.711507	-0.483808	0.224514	0.595403	0.186429	0.435427	0.531243
13426112	AT3G09590	3.52194	4.10962	3.57798	4.56564	4.58397	4.08003	4.23831	4.13612	3.84159	4.61868	3.89888	3.92423	4.00462	4.22483	4.12137	4.89254	4.07267	4.44977	4.34816	4.10219	4.46068	4.64095	4.34354	4.93181	0.482681	0.115206	0.543394	0.326895	-0.511304	0.369745	0.716376	0.026495	0.263609	0.053031	-0.685093	-0.155795	0.343541	-0.122639	0.339303	-0.251594	0.270871	0.482034	-0.372835	-0.149134	0.075694	-0.304625	0.955964	0.637829
13426291	AT3G10000	5.08095	4.92417	4.67613	4.99559	4.6679	4.90999	4.38364	4.95059	4.71856	4.71701	4.82309	5.18222	4.81383	4.76119	4.78611	5.3078	4.92505	4.78611	4.45967	4.76086	4.62699	4.66961	5.2319	4.39326	-0.267122	-0.162985	0.10998	0.312215	0.257152	-0.123876	-0.697311	0.026417	0.042427	-0.278573	0.155198	0.27223	-0.354156	-0.000331	-0.159119	-0.638187	0.306852	-0.392853	0.343155	-0.026748	-0.201546	-0.359614	0.151654	-0.665083
13426555	AT3G10560	2.91562	3.30631	3.37037	3.52515	3.49782	3.37222	3.5554	3.44724	3.26531	3.60151	4.06625	3.06141	3.57613	3.48026	3.22685	3.87738	4.31806	3.67312	4.13776	3.58926	3.53629	3.47101	3.56102	3.65771	0.660509	0.173955	-0.143519	0.352231	0.820237	0.300899	0.639778	0.140932	-0.105053	0.076358	0.568433	-0.31081	0.561637	0.108996	0.309443	-0.406374	-0.757034	-0.015409	-0.078141	-0.031936	0.414496	-0.482732	-1.32547	0.295401
13426667	AT3G10974	2.2617	2.09155	2.44886	2.28253	2.76545	3.09208	2.96759	2.84864	2.275	2.275	2.63815	2.47389	2.66999	2.73687	2.81574	2.49708	2.49708	2.69929	2.32517	2.43963	2.60378	2.49708	2.77237	2.35488	0.408293	0.645319	0.36688	0.21455	-0.268379	-0.392788	0.705887	0.757083	-0.173859	-0.007522	-0.127305	-0.618189	-0.344826	-0.297241	-0.211964	0	0.275296	-0.34441	-1.05071	-1.05432	-0.038105	0.007522	0.402601	0.273779
13426835	AT3G11405	4.09424	3.08015	3.24321	3.56428	3.61729	3.72227	3.30432	3.35481	3.17256	3.02793	3.32818	3.1177	3.25819	3.57221	3.25998	3.60364	3.25819	3.3038	3.2854	3.22604	3.14709	3.44675	3.43191	2.96713	-0.836046	0.492062	0.016763	0.03936	-0.359102	-0.418465	-0.789917	0.274658	-0.070655	-0.536346	-0.289113	-0.604564	0.027213	-0.346171	-0.112886	-0.156888	0.173718	-0.336671	0.81713	-0.620829	-0.042231	0.379458	0.462831	0.267893
13426857	AT3G11460	4.90934	6.31431	6.52847	6.68191	5.28437	5.86025	5.54701	6.44424	6.21588	6.35186	5.40702	5.3645	5.82528	6.37132	6.24435	6.18834	5.2442	5.43271	5.53154	5.92106	6.07222	6.15438	5.50577	5.17057	0.915939	0.057017	-0.284114	-0.493568	-0.040173	-0.42754	0.637663	0.129934	-0.31259	-0.330044	0.122656	-0.495752	-0.293739	-0.45026	-0.172135	-0.033964	0.261569	-0.262139	-0.931402	-0.580194	0.140455	0.29608	0.138913	0.233613
13427117	AT3G12060	5.34485	5.44011	5.81879	5.38797	5.76628	5.36252	4.64261	5.79147	5.45253	4.83453	5.57978	5.40117	6.28283	6.16869	5.34114	5.76738	6.14018	5.25394	6.12552	5.57719	5.3933	6.10283	5.65181	5.45556	0.937978	0.728577	-0.477652	0.37941	0.373902	-0.108585	-0.702242	0.351357	-0.366257	-0.553444	-0.186499	0.038648	-0.157304	-0.591494	0.052163	0.335445	-0.488369	0.201623	0.544938	-0.942851	0.41842	0.888889	-0.30187	0.162975
13427411	AT3G12960	4.62092	3.69764	4.11642	3.733	4.29649	4.14931	3.50255	4.16626	3.64916	3.88955	4.3105	4.0463	3.6214	3.54485	3.67059	3.92442	3.83317	3.62616	3.79835	3.30047	3.85532	3.32038	3.96471	3.72015	-0.99952	-0.152786	-0.445839	0.191418	-0.463318	-0.523148	-1.11837	0.468622	-0.467268	0.156553	0.014012	-0.103009	0.176951	-0.244383	0.18473	-0.60404	0.131533	0.093988	1.29532	-0.713005	0.651998	-0.760593	0.117521	0.196997
13427414	AT3G12977	2.6774	3.40744	3.04324	3.14373	3.00311	3.12083	3.49112	3.30687	3.26531	2.92118	3.21894	3.02276	3.23677	3.50342	3.48743	3.45611	3.49251	3.4004	3.02083	3.23476	3.40744	4.43817	4.1151	3.41976	0.559361	0.095984	0.444183	0.31238	0.489399	0.27957	0.813712	-0.100564	0.222068	-0.222543	0.215829	-0.098069	-0.215935	-0.268662	-0.079989	0.982067	0.622591	0.019359	-1.02965	-0.168098	-0.302057	1.20461	0.406762	0.117428
13427705	AT3G13540	5.57875	4.56948	4.86584	4.9523	5.24728	4.80084	4.28214	4.89958	4.23948	4.00537	4.80609	4.7489	3.97956	3.81219	4.38118	4.21554	3.98845	4.23149	4.0262	4.32981	4.20372	4.11098	4.19842	3.8179	-1.59919	-0.757289	-0.484666	-0.736756	-1.25882	-0.569344	-1.2966	0.330096	-0.626364	-0.946926	-0.441185	-0.051932	0.046643	0.517614	-0.177462	-0.104564	0.20997	-0.413594	1.34325	0.187518	0.448902	0.842362	0.651155	-0.361662
13427926	AT3G13960	6.17581	5.32419	5.18375	5.35306	4.53157	4.61797	5.38007	5.32455	5.21354	4.78746	4.72838	4.93272	6.40966	5.84905	5.78928	5.54676	5.5887	5.73877	6.09104	6.1146	5.94544	5.29923	5.81366	5.23427	0.233854	0.524866	0.605528	0.193703	1.05713	1.1208	-0.795742	0.000359	0.029786	-0.565602	0.196804	0.314747	-0.318618	0.265549	0.156155	-0.247528	0.224964	-0.504493	0.477124	0.26519	0.126369	0.318074	0.02816	-0.81924
13428110	AT3G14431	3.54878	4.30327	3.04124	4.01443	3.52711	4.45092	4.19287	4.90463	3.51289	3.65275	3.83846	4.4841	3.95999	5.08108	4.0587	3.28103	3.98516	4.66442	4.13924	4.04415	3.97697	4.11151	4.39045	4.12394	0.411204	0.777813	1.01746	-0.733401	0.458048	0.213501	0.644091	0.60136	0.471654	-0.361685	0.311351	0.033177	0.179252	-1.03694	-0.08173	0.83048	0.405293	-0.540478	-0.464839	-1.6383	-0.553384	1.19216	0.093942	-0.573655
13428267	AT3G14760	6.05311	5.88863	5.99431	5.78386	6.69101	6.35414	5.15071	5.62623	5.1525	5.63702	6.42851	4.8372	5.84839	6.1121	6.21656	5.87378	6.89577	6.15322	5.67393	5.97645	5.88863	5.78106	6.38973	5.75253	-0.204722	0.22347	0.222248	0.089919	0.204754	-0.200921	-0.902402	-0.262392	-0.841811	-0.146848	-0.262505	-1.51694	-0.174454	-0.135645	-0.327936	-0.092726	-0.506036	-0.400685	0.727948	0.126747	0.513875	0.054122	-0.243531	1.11626
13428534	AT3G15240	4.3348	4.82099	4.26666	5.11126	4.36692	4.93227	3.71905	4.58665	3.72687	4.82865	4.73582	4.84145	4.25958	5.31184	4.3785	4.50618	4.5857	4.67826	4.48168	4.73336	4.72987	4.59742	4.70753	4.598	-0.075214	0.490843	0.111843	-0.605076	0.21878	-0.254006	-0.615748	-0.234342	-0.539792	-0.282609	0.3689	-0.090816	0.222094	-0.578482	0.351367	0.091236	0.121834	-0.080266	0.837842	-0.34414	0.891159	0.373845	-0.247066	0.01055
13428711	AT3G15534	5.75369	5.2287	5.45157	5.27698	7.07082	7.32093	6.86782	5.39084	5.3094	5.47978	6.71795	7.39981	6.12236	6.291	5.40631	6.1935	6.23635	7.66169	5.50063	5.65493	5.517	6.25862	6.31185	8.41114	0.368675	1.06231	-0.045256	0.916523	-0.834467	0.340763	1.11413	0.162144	-0.142166	0.202806	-0.352873	0.078879	-0.621734	-0.636077	0.110688	0.06512	0.075502	0.749446	-1.73586	-0.798221	0.252854	-0.137686	0.428375	0.670567
13428890	AT3G16020	3.61071	3.12078	3.5849	4.08859	3.08499	3.26756	2.68075	3.15546	3.76076	3.34743	2.8114	2.89615	2.12224	2.14036	2.1699	2.32343	2.14733	2.43629	2.41901	2.36095	2.65669	2.19893	2.28253	2.1656	-1.48847	-0.980423	-1.415	-1.76516	-0.937658	-0.831275	-0.92996	0.034683	0.17586	-0.741165	-0.273589	-0.371413	0.296773	0.220588	0.48679	-0.124499	0.135194	-0.270684	1.22673	0.185905	0.31093	0.616666	0.408783	0.100729
13429067	AT3G16330	4.05536	4.88768	4.00826	5.72414	4.39611	5.07455	4.80415	4.39655	4.66811	5.7891	5.29904	5.34648	5.79849	5.32008	5.2427	4.86167	5.22553	5.48557	5.41341	5.26576	5.38329	5.5822	5.21678	5.92617	1.74313	0.432406	1.23443	-0.862475	0.829419	0.411023	0.748792	-0.491125	0.659852	0.064962	0.902933	0.271933	-0.385085	-0.054321	0.140594	0.720531	-0.008745	0.440594	-1.13388	0.436804	-0.519258	0.655569	-0.911678	0.168661
13429130	AT3G16410	6.7363	5.85892	5.48177	6.08681	5.1611	5.72359	4.60148	5.23775	5.02187	5.36438	6.48284	6.60631	4.10606	3.76834	4.09444	4.15704	3.86092	3.92921	3.84335	3.71971	4.38167	4.48254	4.39176	4.41666	-2.63024	-2.09058	-1.38733	-1.92977	-1.30017	-1.79438	-2.13482	-0.621174	-0.4599	-0.722437	1.32175	0.882725	-0.26271	-0.048627	0.287236	0.325503	0.530838	0.487449	1.87211	0.572547	0.747136	1.04794	-0.79091	-0.395276
13429218	AT3G16670	9.09377	8.76147	9.53158	9.92016	9.60559	8.69441	8.50451	9.55512	9.3708	9.77497	8.82695	8.89772	9.12129	8.97468	9.16879	9.29559	9.35876	8.28518	9.30721	8.71049	9.56368	9.43611	9.01702	8.76257	0.027525	0.213205	-0.362786	-0.624572	-0.246829	-0.40923	-0.589261	0.793651	-0.160775	-0.145197	-0.778641	0.20331	0.185922	-0.264188	0.394892	0.140518	-0.341747	0.47739	0.775183	-1.05784	0.555667	0.285715	0.436894	0.27408
13429335	AT3G16851	6.08568	5.70173	4.77059	4.64473	5.10447	5.60487	5.30311	6.73047	4.69102	4.641	5.75698	5.08536	3.95112	3.77262	4.69102	4.77226	5.06137	4.17779	3.95937	4.32939	3.98801	4.75358	5.04739	4.45079	-2.13455	-1.92911	-0.079572	0.127536	-0.043095	-1.42708	-0.782571	1.02875	-0.079572	-0.003724	0.652509	-0.519505	0.00825	0.556777	-0.703002	-0.018686	-0.013984	0.273002	0.790821	-0.471968	-0.62343	-0.014962	-0.666493	0.792507
13429580	AT3G17570	4.09065	4.46404	4.72497	4.88781	4.4288	4.77067	4.74305	5.5173	4.27365	4.01864	4.02549	5.48806	4.7156	4.92876	3.88635	4.28534	4.14835	4.38155	4.97389	4.37497	4.10441	4.1262	4.98369	4.73952	0.624944	0.464711	-0.838618	-0.602469	-0.280447	-0.389121	0.652394	1.05325	-0.451325	-0.869166	-0.403314	0.717393	0.2583	-0.553791	0.21806	-0.159136	0.835335	0.357978	-0.394094	-1.60704	0.669385	0.71003	1.23865	-0.359415
13429609	AT3G17630	4.50264	4.70052	4.48832	5.14172	4.78611	5.02933	5.13366	4.87952	5.13484	4.92629	5.01042	4.56109	5.74733	5.65142	5.62008	5.35834	5.58117	5.65205	5.76033	5.60803	6.05773	5.4567	5.18983	5.78836	1.24469	0.950899	1.13176	0.21662	0.795058	0.622724	0.631022	0.178996	0.646518	-0.215439	0.224315	-0.468239	0.012997	-0.043394	0.437649	0.09836	-0.391335	0.136315	-0.618025	-0.22239	-0.208869	0.313799	-0.61565	0.604554
13429690	AT3G17720	4.4309	4.88757	5.30395	4.79058	4.59501	5.79574	5.58088	4.87919	4.62664	5.10173	4.95616	4.98438	5.27242	4.97764	4.93684	4.9288	5.2565	5.08498	5.7337	4.9811	5.08899	5.25159	4.95536	4.88025	0.841521	0.090064	-0.367105	0.138225	0.661497	-0.710756	1.14999	-0.008378	-0.677303	0.311149	0.361149	-0.811354	0.461285	0.003465	0.152143	0.322786	-0.301148	-0.204738	-0.6887	0.011843	0.829446	0.011637	-0.662297	0.606616
13430206	AT3G18590	6.04777	4.50148	4.70919	5.85238	4.68244	5.66902	4.56495	5.75945	4.61018	5.02462	4.28894	4.9969	4.39989	4.85083	5.27156	4.59373	4.21922	4.71268	4.36283	3.92593	4.40394	4.1888	4.56446	4.36394	-1.64788	0.349348	0.562368	-1.25865	-0.463217	-0.956339	-1.48281	1.25798	-0.09901	-0.827764	-0.393497	-0.672119	-0.037054	-0.924895	-0.867617	-0.404934	0.345239	-0.348744	1.44576	-2.18287	-0.768607	0.42283	0.738736	0.323375
13430517	AT3G19350	3.60928	4.17322	3.29455	3.86825	3.06736	3.90823	4.30394	3.61144	4.27923	3.88751	3.80497	3.53818	6.02766	6.68882	6.78239	4.98392	4.80985	5.36343	6.06158	6.59166	6.16761	5.13902	4.71901	5.14325	2.41837	2.51559	3.48784	1.11566	1.74249	1.4552	0.694652	-0.561787	0.984688	0.019257	0.73761	-0.370052	0.033917	-0.097158	-0.614776	0.155099	-0.090839	-0.220181	-0.660735	0.464629	-1.59946	0.135842	-0.828449	0.149871
13430899	AT3G20150	6.69884	6.09051	6.31831	6.28894	6.26085	6.48593	6.10849	6.28089	5.58029	6.21057	6.53592	5.52442	6.83152	6.38896	6.36521	7.06851	6.78335	6.83066	6.84633	6.21533	6.67567	6.76799	6.65552	6.62387	0.132676	0.298458	0.046903	0.779574	0.522503	0.344724	-0.590353	0.190384	-0.73802	-0.078369	0.275066	-0.961511	0.014812	-0.173636	0.310457	-0.300525	-0.127836	-0.206794	0.605165	-0.36402	1.04848	-0.222156	-0.402902	0.754717
13430918	AT3G20155	3.45209	3.20529	3.01339	3.20348	3.30218	3.9152	2.66075	3.6515	3.26692	3.05896	3.24709	3.17846	3.26241	3.37067	2.66813	3.02711	2.67008	2.90384	2.97089	3.20903	2.99695	2.89778	3.23131	2.95685	-0.189678	0.165381	-0.345255	-0.17637	-0.632095	-1.01136	-0.791336	0.446207	0.253533	-0.144516	-0.055084	-0.736738	-0.291517	-0.16164	0.328815	-0.129323	0.561229	0.053006	0.499819	-0.607847	0.075282	0.015193	0.616313	0.789744
13431303	AT3G20950	3.01135	2.62661	2.7254	2.62269	2.62724	2.65872	2.43461	2.64221	2.50198	2.37823	2.23071	2.22126	2.7254	2.73405	3.75468	3.35239	2.84041	3.27545	2.34411	2.82209	4.06739	2.49087	3.21451	2.67147	-0.285943	0.107448	1.02928	0.7297	0.21317	0.616726	-0.576735	0.015599	-0.223428	-0.244456	-0.396529	-0.437461	-0.38129	0.088034	0.312703	-0.861517	0.374109	-0.603982	0.195445	0.072435	0.536131	-0.617061	0.770638	-0.166521
13431307	AT3G20960	5.19675	5.44215	5.73149	5.80232	6.40123	5.49114	5.99444	6.06264	5.99885	6.26433	6.24867	6.97556	6.3814	6.42558	6.92435	6.99383	6.8405	6.59904	6.47761	6.93551	6.80599	7.08631	6.97241	7.05165	1.18465	0.983427	1.19287	1.19151	0.439261	1.1079	0.797691	0.620483	0.267363	0.462001	-0.152565	1.48443	0.096204	0.509931	-0.118364	0.092485	0.131909	0.452614	-0.701487	-0.110552	-0.385727	-0.369516	0.284474	-1.03181
13431327	AT3G21000	3.27207	3.39483	3.45516	3.20369	3.31902	3.31755	2.67922	3.49088	3.2665	2.81852	3.28122	3.33514	3.53763	3.67717	3.33008	3.74098	3.84098	3.56949	3.70691	4.04686	3.58429	3.35261	3.10664	3.42007	0.265566	0.282339	-0.125084	0.537293	0.521956	0.251935	-0.592854	0.096049	-0.188659	-0.385167	-0.037807	0.01759	0.169277	0.369686	0.254207	-0.388377	-0.734337	-0.149414	0.762131	0.273637	0.442866	-0.00321	-0.69653	-0.167004
13431518	AT3G21490	3.88751	3.09946	3.66728	3.14273	3.72667	3.26661	3.05768	3.16894	3.01874	3.28065	2.89658	3.17757	3.0187	3.6804	3.20953	3.55358	3.58647	3.38265	3.18059	3.28065	3.44699	3.108	3.54881	3.25958	-0.868816	0.580942	-0.457744	0.410852	-0.140195	0.116037	-0.829834	0.069475	-0.648539	0.137922	-0.83009	-0.089042	0.161891	-0.399752	0.237459	-0.445583	-0.037663	-0.123071	0.991725	-0.469227	0.885998	-0.583505	0.792427	-0.034029
13431572	AT3G21780	5.83906	5.13305	5.00555	5.15251	4.99788	4.973	6.54531	5.32934	5.93848	5.65077	5.29859	5.46235	7.08788	6.44651	5.88717	6.27285	6.28402	6.12825	7.58641	7.05007	6.17725	6.84026	6.61787	6.43865	1.24882	1.31346	0.881619	1.12034	1.28613	1.15526	0.706249	0.196289	0.932924	0.498257	0.300712	0.489356	0.498526	0.603555	0.290076	0.567409	0.333854	0.310397	-0.207723	0.407266	-0.642848	0.069152	0.033142	-0.178959
13431608	AT3G21940	4.01369	3.34764	3.68183	4.31651	3.77656	4.61255	2.88957	4.9964	4.23656	3.34479	3.60028	3.8123	3.23892	3.74651	3.79835	3.75904	3.54398	3.92444	3.69365	3.61191	3.05895	2.87018	4.66465	3.37388	-0.774775	0.39887	0.116526	-0.557467	-0.232573	-0.688105	-1.12412	1.64876	0.554738	-0.971721	-0.176281	-0.800254	0.454727	-0.134601	-0.739405	-0.888864	1.12067	-0.550568	1.57885	-1.78336	-1.29414	0.082857	1.29695	0.249686
13431676	AT3G22090	3.14555	3.67229	3.74582	3.41883	3.82718	3.86133	3.89343	4.26268	3.22742	3.29467	3.86851	3.49522	3.13935	3.88731	3.5303	3.21678	4.81641	4.0826	3.62824	3.15748	2.90187	2.95347	4.33314	3.24146	-0.006203	0.215019	-0.215512	-0.202049	0.989227	0.221273	0.747874	0.590389	-0.5184	-0.124163	0.041326	-0.366113	0.488886	-0.729829	-0.628436	-0.26331	-0.483271	-0.841149	-0.258988	-1.32022	-0.110036	-0.139147	-0.524597	-0.475036
13432000	AT3G22940	3.3661	4.07886	4.03542	4.07043	3.74026	4.68949	4.21194	4.47224	4.74181	3.21393	3.20638	3.76953	6.22209	6.71009	6.61125	6.62153	6.62033	6.61072	6.55355	6.24073	6.6811	6.70268	6.50403	5.81629	2.85599	2.63123	2.57583	2.55109	2.88007	1.92123	0.845831	0.39338	0.706398	-0.856498	-0.533878	-0.91996	0.331454	-0.469357	0.069854	0.081155	-0.116299	-0.794432	-0.514377	-0.862737	-0.636544	0.937653	0.417579	0.125528
13432093	AT3G23140	3.88417	4.72294	4.58901	4.73448	4.73871	4.6436	4.46784	3.99944	3.98087	4.24258	3.97358	3.90281	5.25258	4.70894	4.58818	5.18145	4.54443	5.02307	4.7484	4.59126	4.46715	4.22241	4.58423	4.60817	1.36842	-0.013996	-0.000825	0.44697	-0.194276	0.379476	0.583672	-0.723494	-0.608134	-0.491904	-0.765123	-0.740781	-0.504187	-0.117678	-0.121028	-0.95904	0.039801	-0.414903	-1.08786	0.605816	0.487106	-0.467136	0.804924	0.325878
13432205	AT3G23320	3.8495	4.60802	4.38127	3.92139	4.4721	4.57604	4.70328	4.67125	4.30763	4.12089	4.56508	4.24805	4.2128	4.00389	4.12089	4.12089	4.18334	3.65695	4.19443	4.11346	3.88191	3.75749	3.98536	3.91549	0.363302	-0.604129	-0.260379	0.199504	-0.288763	-0.919096	0.853783	0.06323	-0.073646	0.199504	0.092981	-0.327996	-0.018373	0.10957	-0.238982	-0.363401	-0.197977	0.25854	-0.872156	0.04634	-0.165336	-0.562905	-0.290958	0.586536
13432279	AT3G23470	4.98688	4.56235	3.84357	4.81566	4.115	4.49082	4.03396	4.24471	4.22159	3.96088	4.24137	4.66693	4.88371	4.81284	4.27231	4.56718	4.06287	4.33421	4.84336	4.9135	4.94122	4.56858	4.19738	4.52707	-0.103169	0.250493	0.428739	-0.248478	-0.052133	-0.156607	-0.952916	-0.31764	0.378017	-0.854784	0.126365	0.176116	-0.040345	0.100657	0.668906	0.001397	0.134507	0.192863	0.912571	0.418297	0.290889	0.856181	0.008142	0.016747
13432310	AT3G23510	6.25782	4.94205	5.28194	4.59424	6.92775	6.28753	5.28786	3.92884	4.20058	4.75774	6.69572	5.65887	3.82014	4.22483	3.35329	3.60364	3.50159	4.0145	3.68864	3.92234	3.19889	3.37759	3.67846	3.70345	-2.43769	-0.71722	-1.92866	-0.9906	-3.42616	-2.27303	-0.969965	-1.01321	-1.08136	0.163499	-0.232022	-0.628655	-0.131495	-0.302489	-0.154404	-0.226054	0.176869	-0.31105	0.83847	0.710721	0.926957	-0.389553	0.408891	0.317605
13432527	AT3G23800	5.80928	5.01811	5.19864	5.29507	4.69216	5.2412	5.23254	5.0475	3.83224	5.03882	4.09749	4.6795	4.82557	4.95602	4.72647	4.94422	4.45188	4.69792	4.87556	4.67106	4.21002	4.81469	5.10345	4.7411	-0.983709	-0.062087	-0.47217	-0.350853	-0.240285	-0.543281	-0.576742	0.029392	-1.36639	-0.256253	-0.59467	-0.561696	0.049994	-0.284961	-0.516446	-0.129523	0.651574	0.043182	0.626736	-0.314353	0.849945	0.12673	1.24624	0.604878
13432690	AT3G24225	3.32102	3.85767	3.5873	3.82027	3.34833	2.86358	3.96359	3.55407	3.12394	3.00548	3.69802	3.4703	3.44196	3.45627	3.7385	3.53678	3.46776	3.46679	3.86116	3.59599	3.80252	3.80083	3.22535	3.60583	0.120933	-0.401401	0.1512	-0.28349	0.119435	0.60321	0.642563	-0.303603	-0.463364	-0.81479	0.349691	0.606713	0.419202	0.13972	0.064017	0.264048	-0.24241	0.139036	-0.223361	0.443323	0.527381	1.07884	-0.592101	-0.467677
13432756	AT3G24520	5.9794	6.47511	6.99165	7.81002	7.6235	8.04224	6.34059	6.40183	6.5378	7.46452	7.67076	7.86795	6.17457	6.85229	7.13361	7.76248	8.02493	7.75061	6.11661	6.64841	6.94684	7.32208	7.43297	7.17557	0.195174	0.377186	0.141956	-0.047539	0.401429	-0.291632	0.361192	-0.07328	-0.453855	-0.3455	0.047262	-0.174296	-0.057964	-0.20388	-0.186768	-0.440402	-0.591964	-0.575038	-0.419156	-0.1306	0.267087	-0.094902	-0.639226	-0.400742
13432922	AT3G24850	4.91502	4.22425	4.46714	4.72332	4.58151	4.76303	4.11793	4.90313	4.34886	4.51368	4.14871	4.29546	4.82434	4.88516	4.51836	3.78282	3.87639	4.22889	4.28925	3.95715	4.6202	4.46729	4.41294	4.22533	-0.090674	0.660908	0.051216	-0.940509	-0.705115	-0.534141	-0.797089	0.678877	-0.118284	-0.209645	-0.432793	-0.467578	-0.535099	-0.928012	0.101842	0.684474	0.53655	-0.003561	0.26199	-1.60689	0.220126	0.894119	0.969343	0.464017
13433069	AT3G25420	3.62582	3.68353	2.96252	3.09587	3.3084	3.36804	3.027	3.75584	3.40082	3.19385	3.21066	3.67588	3.54244	3.62633	3.58367	3.62036	2.91208	3.0889	3.04948	3.36804	2.6315	3.38199	3.13484	3.8937	-0.08338	-0.057206	0.621151	0.524494	-0.396324	-0.279141	-0.598826	0.072311	0.438302	0.097976	-0.097744	0.307835	-0.492966	-0.258286	-0.952168	-0.238377	0.222762	0.804803	0.10586	-0.330597	-1.39047	-0.336353	0.320506	0.496968
13433224	AT3G25730	3.88842	3.06875	3.25779	3.4006	2.96545	3.36504	3.18385	3.28648	4.09469	3.13765	2.89875	3.11774	3.65575	3.7012	3.44807	3.31309	3.72745	3.4063	3.90477	3.9658	3.60982	3.84124	3.2839	3.24579	-0.232664	0.63245	0.190283	-0.087507	0.762	0.04125	-0.704565	0.217728	0.836905	-0.262947	-0.066701	-0.247302	0.249015	0.264593	0.161746	0.528151	-0.443551	-0.160504	0.95358	0.046865	-0.675159	0.791098	-0.37685	0.086798
13433335	AT3G25960	3.47838	3.93516	3.35064	3.76112	3.10814	4.07063	4.31745	3.37698	3.45833	3.9428	3.52941	3.54832	3.32991	4.00386	4.04515	4.41531	4.19376	3.79835	3.79835	4.12801	3.76858	4.14665	3.79835	4.37757	-0.148478	0.068699	0.694516	0.654185	1.08562	-0.272275	0.839063	-0.558185	0.107696	0.181679	0.42127	-0.522312	0.468447	0.124149	-0.276575	-0.268657	-0.395403	0.57922	-0.370616	0.682334	-0.384271	-0.450336	-0.816673	1.10153
13433470	AT3G26235	2.98412	3.10078	3.38274	3.3522	2.93354	3.49694	4.02046	3.04125	2.70738	3.08024	3.11759	3.5962	2.7464	2.74133	2.71464	2.95183	2.66012	3.09991	2.91906	2.71251	2.8622	2.85174	2.92651	2.72244	-0.237713	-0.359452	-0.668098	-0.400373	-0.273421	-0.397033	1.03634	-0.059531	-0.67536	-0.271965	0.184048	0.099262	0.172655	-0.028822	0.147555	-0.100085	0.266393	-0.377466	-0.863684	0.030709	0.822915	0.17188	0.082345	-0.476728
13433930	AT3G27425	3.37753	3.57917	3.02042	3.20605	3.69216	3.46021	2.7849	3.20605	2.77226	2.99292	2.89529	3.12186	3.20605	3.02969	2.9689	3.59789	3.20605	3.3988	2.99292	3.73061	3.39738	3.312	3.14522	3.17981	-0.171473	-0.549476	-0.05152	0.39184	-0.48611	-0.061405	-0.592625	-0.373112	-0.248162	-0.213129	-0.79687	-0.338345	-0.213132	0.700926	0.428478	-0.285896	-0.060832	-0.21899	0.379493	1.07404	0.67664	-0.072767	0.736038	0.119355
13434055	AT3G27720	4.59472	4.22849	4.28421	4.65998	4.07052	3.80661	3.42676	4.69566	3.51361	4.05383	4.1064	4.55829	4.50068	3.89963	3.97183	3.96744	4.2525	3.82664	4.27368	4.38723	3.78401	3.2505	3.6876	4.06845	-0.094043	-0.328853	-0.312379	-0.692544	0.18198	0.020029	-1.16796	0.467176	-0.770597	-0.60615	0.035884	0.751681	-0.226993	0.487596	-0.187815	-0.716939	-0.564901	0.24181	0.940969	0.02042	0.582782	-0.110789	-0.600785	-0.509871
13434172	AT3G28070	6.48329	5.7291	6.93494	7.13402	7.87392	7.95775	5.26105	5.23793	6.67736	7.36509	7.33249	7.36925	4.81412	4.9125	5.10028	5.02285	4.99131	4.93886	5.14999	4.86395	4.68777	4.93224	5.54982	4.9125	-1.66916	-0.816606	-1.83466	-2.11117	-2.88261	-3.01889	-1.22224	-0.491173	-0.257582	0.231067	-0.541423	-0.588501	0.33586	-0.04855	-0.41251	-0.090612	0.558515	-0.026368	1.5581	0.442623	-0.154928	-0.321679	1.09994	0.562133
13434303	AT3G28500	7.31105	6.45955	6.56111	6.65231	6.62703	6.49208	6.70173	6.98763	6.4896	6.44408	6.41997	6.50871	7.81223	7.66776	7.67335	7.63625	8.24328	7.80726	7.90828	7.93969	7.77461	7.73275	7.69453	8.18651	0.501181	1.20821	1.11224	0.98394	1.61625	1.31518	-0.609317	0.528078	-0.071509	-0.208235	-0.207067	0.016626	0.096045	0.271931	0.101267	0.096495	-0.548755	0.379248	0.705362	-0.256147	0.172776	0.30473	-0.341688	0.362622
13434468	AT3G28918	3.63461	4.17831	2.87882	3.82311	4.84066	3.30816	4.22781	4.09222	2.60599	2.73784	2.60935	2.70221	3.01677	2.93771	2.9513	2.74939	2.83932	2.75612	2.91567	2.20092	2.88693	3.17257	2.83068	2.42091	-0.617833	-1.2406	0.072479	-1.07372	-2.00134	-0.552047	0.593207	-0.08609	-0.272832	-1.08527	-2.23131	-0.605957	-0.101109	-0.736796	-0.064368	0.423179	-0.00864	-0.335208	-0.694316	-0.650706	0.208464	1.50845	2.22267	0.270749
13434470	AT3G28925	3.92604	4.71236	3.53029	3.90394	3.71476	4.62324	4.7054	4.30207	3.22063	4.29067	4.13784	3.99586	4.61301	3.50448	4.53823	4.65446	5.27719	4.45258	4.66516	4.16002	4.68164	4.50935	4.419	5.17857	0.68697	-1.20788	1.00794	0.750515	1.56243	-0.170659	0.779359	-0.410288	-0.309655	0.386726	0.423076	-0.627376	0.05215	0.655533	0.143416	-0.145108	-0.858193	0.725987	-0.727209	1.06582	0.453071	-0.531834	-1.28127	1.35336
13434501	AT3G29040	3.83397	3.76232	4.21993	4.60029	3.82355	4.9629	4.56686	5.05576	4.11341	3.94893	3.76554	4.03194	4.11234	5.65712	4.02817	4.58684	3.9675	4.4918	4.08065	4.11897	3.94318	3.85356	4.56842	4.10845	0.278365	1.8948	-0.191767	-0.013446	0.143954	-0.4711	0.732885	1.29344	-0.106528	-0.651356	-0.058001	-0.930965	-0.031689	-1.53815	-0.084986	-0.733281	0.600925	-0.383351	-0.764574	-2.8316	0.021542	-0.081925	0.658926	0.547614
13434856	AT3G32260	3.7618	3.82117	4.17778	3.51446	4.09074	3.45909	2.95971	3.82251	2.41228	3.19223	4.19689	4.33467	3.76258	3.51472	3.25422	2.94048	3.94962	3.42681	3.49708	3.14293	3.21835	3.09106	3.16127	4.09653	0.000778	-0.306442	-0.923557	-0.573984	-0.141119	-0.032282	-0.802086	0.001344	-1.7655	-0.322237	0.106156	0.875577	-0.265499	-0.371796	-0.035872	0.150584	-0.78835	0.669722	0.536587	-0.37314	1.72963	0.472821	-0.894506	-0.205855
13434935	AT3G42310	3.24073	3.07279	3.37481	3.14177	3.13144	4.13486	2.61295	2.90471	5.58274	2.80904	3.04735	3.76188	7.49631	7.5066	7.60782	7.61419	7.66704	7.16309	7.24829	7.17609	7.30077	7.52945	7.59031	7.2473	4.25558	4.43381	4.23301	4.47242	4.5356	3.02823	-0.627782	-0.168077	2.20793	-0.332733	-0.084089	-0.372977	-0.248025	-0.330506	-0.307056	-0.084738	-0.076726	0.084214	0.379757	-0.162429	-2.51499	0.247995	0.007363	0.457191
13434998	AT3G42800	4.5739	5.40848	5.31372	4.99818	4.94581	4.78956	5.75161	5.83471	5.04082	4.71378	4.58711	4.74778	4.56821	5.47491	5.7445	4.85116	4.76703	4.33366	4.75995	5.03099	5.84522	4.2776	4.26366	4.67184	-0.005691	0.066434	0.430782	-0.147017	-0.178776	-0.455893	1.17771	0.426236	-0.272905	-0.284402	-0.3587	-0.041779	0.19174	-0.443918	0.100714	-0.573557	-0.503372	0.338182	-0.985965	-0.870154	0.373619	-0.289155	-0.144672	0.379961
13435143	AT3G43570	2.21759	2.45174	3.18686	3.78439	3.00475	3.44083	2.99044	2.36699	2.42463	2.94411	3.87527	2.95096	2.95068	2.36914	2.70502	2.44041	3.0488	2.37864	2.62915	2.53307	2.70576	2.97385	2.30354	2.68143	0.733084	-0.082591	-0.481837	-1.34398	0.044043	-1.06219	0.772853	-0.084744	-0.762231	-0.840277	0.870518	-0.48987	-0.321523	0.163925	0.000743	0.533442	-0.745255	0.302791	-1.09438	0.248669	0.762974	1.37372	-1.61577	0.792661
13435298	AT3G44050	6.47916	6.15311	6.17418	6.37995	6.36306	6.4072	5.79016	6.03056	6.09227	6.05108	6.25715	6.09076	6.65984	6.40028	6.27491	6.93117	7.07724	6.58544	6.62245	6.11339	6.60768	7.00197	6.5376	6.92222	0.180686	0.247171	0.100735	0.551227	0.714177	0.17824	-0.688997	-0.122547	-0.08191	-0.328865	-0.105916	-0.316439	-0.037395	-0.28689	0.332766	0.070795	-0.539642	0.336778	0.651602	-0.164343	0.414676	0.39966	-0.433726	0.653217
13435330	AT3G44130	3.74846	4.58036	4.3397	3.60031	4.41978	4.97648	2.82875	4.43917	3.47256	3.26256	3.86445	4.78093	3.72574	4.10199	4.18086	3.81728	4.47871	3.93144	3.28199	3.56122	3.31824	3.65591	4.06388	4.33757	-0.022717	-0.478371	-0.158843	0.216971	0.058933	-1.04505	-0.91971	-0.141195	-0.867143	-0.337751	-0.555332	-0.195555	-0.44375	-0.540768	-0.86262	-0.16137	-0.414832	0.40613	0.47596	-0.399573	0.004523	0.176381	0.1405	0.601685
13435361	AT3G44210	5.54749	4.84765	5.07208	5.35087	5.12811	5.451	4.66908	5.57828	4.90136	4.86028	4.27974	5.01582	4.80574	4.52149	4.7829	5.0358	5.05716	5.31774	4.68975	4.32602	4.01306	4.42413	5.96529	4.98727	-0.741752	-0.32616	-0.289182	-0.315064	-0.070949	-0.133265	-0.878419	0.730629	-0.170726	-0.490585	-0.848376	-0.435184	-0.115991	-0.195477	-0.769837	-0.611667	0.908128	-0.330465	0.762428	-0.926106	-0.599111	-0.121082	1.7565	0.104719
13435526	AT3G44713	6.27812	6.38992	6.73662	6.32027	5.55682	5.94664	5.43934	5.19271	6.18775	6.19582	5.70801	5.737	4.78148	4.37472	4.74139	4.64266	4.36662	4.71002	4.29118	4.84077	4.65288	4.56508	4.54446	4.82049	-1.49664	-2.01521	-1.99523	-1.67761	-1.19019	-1.23663	-0.838777	-1.19721	-0.548863	-0.124455	0.151193	-0.209644	-0.490299	0.466055	-0.088514	-0.077575	0.177836	0.110474	0.348478	1.66327	0.460349	0.04688	0.026643	0.320118
13435633	AT3G44860	8.20066	8.2692	7.8069	6.71709	9.63382	10.251	8.79568	8.5505	9.04484	9.58581	11.2878	11.3645	5.31474	4.63549	4.47998	5.72798	4.96387	6.06237	5.17009	4.65467	4.72184	6.91329	7.36889	6.95783	-2.88592	-3.63372	-3.32692	-0.989112	-4.66995	-4.1886	0.595023	0.2813	1.23794	2.86871	1.65394	1.1135	-0.144644	0.019183	0.241854	1.18531	2.40503	0.895464	-0.739667	-0.262117	-0.996086	-1.6834	0.751084	-0.218036
13435638	AT3G44870	3.37812	2.76745	2.92663	2.70558	2.7923	3.0396	2.63964	3.43796	3.0398	3.14364	3.70329	3.26922	3.40171	3.09357	3.10247	3.26791	2.55642	2.92663	3.10407	2.92663	3.22906	3.19253	3.14605	2.91342	0.023599	0.326112	0.175838	0.562335	-0.235881	-0.112973	-0.738479	0.670507	0.113167	0.438059	0.910986	0.22962	-0.297641	-0.166937	0.126591	-0.075383	0.589632	-0.013208	0.440838	-0.837444	0.013424	-0.513442	-0.321354	-0.242828
13435756	AT3G45245	4.81215	4.41664	4.1381	4.53206	4.44341	4.2135	3.7954	4.63617	4.09613	3.97843	4.18455	5.04276	4.31716	4.79886	3.93787	4.58819	4.47518	5.27377	4.52336	4.67806	4.32571	4.49355	4.72469	4.43195	-0.494994	0.382224	-0.200228	0.056128	0.031775	1.06027	-1.01675	0.219528	-0.041972	-0.553625	-0.258862	0.829263	0.206197	-0.120805	0.387835	-0.094642	0.249504	-0.841812	1.22295	-0.340333	0.429807	0.458983	0.508366	-1.67108
13435829	AT3G45660	4.36646	4.85026	4.22655	5.12966	4.80779	4.10759	5.25555	5.02411	4.51265	4.7946	4.74009	4.36781	5.3903	4.69137	5.25411	4.93257	4.94309	5.06001	4.90083	5.26746	5.25244	5.22562	4.85896	5.0838	1.02384	-0.158894	1.02756	-0.197089	0.135296	0.95241	0.889092	0.173846	0.286106	-0.335055	-0.067706	0.260217	-0.489473	0.576091	-0.001663	0.293046	-0.084133	0.023796	-1.37857	0.402245	-0.287769	0.628101	-0.016427	-0.236421
13435988	AT3G46130	7.6459	7.10705	7.69711	8.45708	8.0147	8.7701	7.0102	6.39937	7.71567	8.38668	7.91097	8.13301	7.46263	7.65853	8.05815	8.29287	8.64568	9.29063	7.12148	7.22813	7.09337	8.04755	8.44895	8.86395	-0.183271	0.551474	0.361038	-0.164212	0.630972	0.520527	-0.635695	-0.707685	0.018558	-0.070405	-0.103737	-0.63709	-0.341145	-0.430399	-0.964785	-0.245321	-0.196729	-0.426679	0.29455	0.277286	-0.983343	-0.174916	-0.092992	0.210411
13436076	AT3G46370	9.22142	10.1033	8.51332	6.74491	10.0645	9.70144	9.94173	10.1208	8.07653	6.49107	10.1195	9.04517	4.63869	4.29793	4.15374	5.09384	4.87027	4.97463	4.42433	4.53541	4.3309	4.4421	4.26518	4.70912	-4.58273	-5.80539	-4.35958	-1.65107	-5.19421	-4.72681	0.720315	0.0175	-0.436799	-0.253841	0.05505	-0.656278	-0.214356	0.237482	0.177157	-0.651738	-0.605092	-0.265514	-0.934671	0.219982	0.613956	-0.397897	-0.660142	0.390764
13436196	AT3G46613	3.04074	3.40014	3.16511	3.18383	2.93668	3.09143	3.78942	3.28771	3.22225	3.24019	3.02909	3.37957	3.57142	3.76285	3.31325	3.5971	3.36768	3.14727	3.47869	3.49091	3.44634	3.36409	3.19308	3.38975	0.53068	0.362711	0.148144	0.413263	0.431009	0.055843	0.748689	-0.112432	0.057147	0.056358	0.092416	0.288142	-0.09273	-0.271944	0.133093	-0.233006	-0.174602	0.242479	-0.841419	-0.159512	0.075946	-0.289364	-0.267018	-0.045663
13436206	AT3G46660	5.58074	5.99296	6.0301	6.12436	6.04034	6.32433	6.42838	5.83213	5.9624	6.28587	6.18648	6.36076	6.6775	6.43487	6.2946	6.73044	6.53407	6.34724	6.32475	6.40422	6.50871	6.5518	6.43788	6.8897	1.09676	0.441909	0.264502	0.606086	0.493733	0.022912	0.847643	-0.160831	-0.067699	0.161516	0.14614	0.036428	-0.352756	-0.030647	0.214115	-0.178645	-0.096195	0.542462	-1.2004	0.130184	0.281814	-0.340161	-0.242335	0.506034
13436543	AT3G47720	2.65922	3.02458	2.80409	3.41164	3.13365	3.43182	3.56158	3.40037	2.8382	2.84516	2.71713	3.01513	3.4109	2.94538	3.27704	3.02938	3.07397	3.36686	3.23598	2.90093	3.1935	3.04232	3.14429	3.07086	0.751671	-0.079204	0.472946	-0.382258	-0.059685	-0.064963	0.902357	0.375793	0.034106	-0.566478	-0.416518	-0.416691	-0.174917	-0.044444	-0.083533	0.012939	0.070323	-0.296001	-1.07727	-0.420237	-0.117639	0.579417	0.486841	0.12069
13436672	AT3G47920	2.86126	3.01387	2.75466	2.82166	3.15363	3.39301	3.55782	3.58807	2.93398	3.27429	2.92525	2.72864	3.45501	3.31451	3.01144	3.2551	3.02562	2.98337	3.3049	2.95121	2.8825	2.75975	3.03543	2.86766	0.593751	0.300644	0.256778	0.433436	-0.128015	-0.409638	0.696566	0.574204	0.179324	0.452631	-0.228385	-0.66437	-0.15011	-0.363304	-0.128942	-0.495352	0.009805	-0.11571	-0.846676	-0.937508	-0.308266	-0.947983	0.23819	0.54866
13436912	AT3G48280	4.25357	5.37624	5.30848	5.45248	5.76815	6.38092	5.04505	5.55551	5.33234	5.16177	5.99339	3.99854	3.44799	2.97196	3.26443	2.99857	3.58511	3.19596	3.2499	3.3548	3.08376	3.05081	3.1201	3.24791	-0.805586	-2.40428	-2.04405	-2.4539	-2.18304	-3.18496	0.79148	0.179276	0.023862	-0.290709	0.225236	-2.38238	-0.198091	0.382845	-0.180671	0.052237	-0.465016	0.051949	-0.989571	0.203569	-0.204533	0.342946	-0.690252	2.43433
13436924	AT3G48310	7.5977	7.65569	8.26614	7.65074	8.66364	8.46378	8.3616	7.92905	8.38497	8.24989	8.63035	8.90768	8.79842	8.62978	8.84803	9.08868	9.09082	9.05353	9.14322	8.73386	8.67685	9.00487	8.99221	9.09904	1.20072	0.974087	0.581888	1.43794	0.427179	0.589752	0.763895	0.273354	0.118821	0.599156	-0.033285	0.443903	0.344797	0.104082	-0.171178	-0.083813	-0.098607	0.045514	-0.419098	-0.169272	-0.289999	-0.682969	-0.065322	-0.398389
13436941	AT3G48346	5.3865	5.38573	5.96239	4.33058	4.3845	4.95875	3.96415	4.7891	4.80147	4.67866	4.72877	5.44463	3.60894	4.53576	3.49501	3.64504	4.87894	3.36638	3.09384	3.61849	3.37072	5.10906	3.46126	3.64332	-1.77757	-0.849966	-2.46738	-0.685536	0.494441	-1.59237	-1.42236	-0.596625	-1.16092	0.348087	0.344272	0.485872	-0.515096	-0.917276	-0.124283	1.46402	-1.41767	0.27694	0.907259	-0.320651	1.03664	1.11593	-1.76195	-0.208932
13436943	AT3G48350	6.87408	6.09296	6.75688	6.57704	6.23402	6.45226	6.19264	5.7215	6.42338	6.38438	6.71303	6.84142	5.60426	5.54151	6.25806	5.97965	6.21233	6.8342	5.21497	5.34508	6.24285	6.48785	6.27405	6.89497	-1.26982	-0.551447	-0.498822	-0.597384	-0.021697	0.381932	-0.681439	-0.371459	-0.333506	-0.192651	0.479009	0.389159	-0.389296	-0.19643	-0.015207	0.508204	0.061719	0.060773	0.292143	0.175029	0.318299	0.700855	-0.41729	-0.328386
13437101	AT3G48675	2.9745	3.78889	4.26662	4.60367	3.63422	4.44388	4.29786	4.69621	3.47054	4.56222	3.33914	4.38692	3.48638	3.29267	3.1464	3.48026	3.53727	3.93096	3.86808	3.57153	3.63261	3.31529	4.92957	3.29165	0.511882	-0.496216	-1.12022	-1.12341	-0.096952	-0.512911	1.32336	0.907317	-0.796076	-0.04145	-0.295076	-0.056952	0.381699	0.278858	0.486211	-0.16497	1.39231	-0.639313	-0.941658	-0.628459	1.28229	-0.12352	1.68738	-0.582361
13437134	AT1G77030	4.52954	5.09531	5.23043	4.51433	4.91505	5.44063	5.52325	5.55529	5.47382	4.54553	5.30177	4.88993	5.34514	5.33472	5.81263	5.86871	5.69639	5.8702	5.46014	5.79498	5.01941	5.25845	5.62615	5.55524	0.815603	0.239413	0.582206	1.35439	0.781339	0.429572	0.993714	0.45998	0.243399	0.031201	0.386727	-0.550702	0.115002	0.460254	-0.793226	-0.610267	-0.07023	-0.314962	-0.878712	0.000274	-1.03662	-0.641468	-0.456957	0.23574
13437316	AT3G49110	9.08848	7.51627	6.76112	7.33337	7.5226	7.00858	9.80077	7.63838	8.0872	6.94059	7.33183	7.10763	8.03355	7.67888	7.09961	7.26329	7.94191	8.19805	8.05701	7.47405	7.63175	7.7557	8.45016	8.06674	-1.05493	0.162604	0.338494	-0.070077	0.419315	1.18946	0.712285	0.122104	1.32609	-0.392777	-0.190769	0.09905	0.023463	-0.204831	0.532136	0.492408	0.508242	-0.131304	-0.688822	-0.326935	-0.793951	0.885185	0.699011	-0.230354
13437396	AT3G49330	5.16533	5.21363	5.14828	6.13195	6.0069	6.741	5.86523	5.34078	5.4176	6.04889	5.93019	6.33408	4.97858	5.36232	5.52408	5.42418	5.88057	6.1579	5.0963	5.06637	5.42606	6.09152	5.58047	6.00558	-0.18675	0.148689	0.375801	-0.707774	-0.126328	-0.583108	0.6999	0.127148	0.269319	-0.083063	-0.076711	-0.406921	0.117715	-0.295948	-0.098024	0.667339	-0.300098	-0.152319	-0.582185	-0.423096	-0.367343	0.750402	-0.223387	0.254602
13437561	AT3G49845	3.93286	4.4181	4.35183	4.41104	4.37513	4.36256	4.81221	4.47386	4.2578	4.15545	4.32926	4.09997	4.58316	4.1981	4.15435	4.41903	4.39121	4.25693	4.30366	4.31265	4.43262	4.55969	4.45263	4.4068	0.650299	-0.220004	-0.197484	0.007991	0.016083	-0.10563	0.879352	0.055763	-0.094034	-0.255592	-0.045863	-0.262597	-0.2795	0.114548	0.278267	0.140662	0.061416	0.149866	-1.15885	0.058785	0.372301	0.396254	0.107279	0.412463
13437622	AT3G50090	4.68794	4.8915	4.60567	4.49195	4.36668	4.25315	4.0213	5.29003	4.55824	4.79747	4.18323	4.58683	4.1595	4.63477	4.30896	3.88509	3.92821	3.97615	4.28797	4.58334	4.04971	4.19302	4.24833	4.08939	-0.528445	-0.256724	-0.296709	-0.606861	-0.438474	-0.276999	-0.666638	0.398538	-0.047432	0.305518	-0.18345	0.333681	0.12847	-0.051432	-0.259252	0.307933	0.320116	0.113235	0.795108	-0.44997	-0.21182	0.002415	0.503566	-0.220446
13437685	AT3G50400	2.97867	3.20634	3.32465	3.48489	3.59474	4.24866	3.82637	3.9057	2.84478	3.1886	3.60227	3.68193	3.43336	3.49642	3.32025	3.4557	3.52321	3.79878	3.62135	3.77179	3.51545	3.52861	3.65571	4.13189	0.454692	0.290084	-0.004404	-0.029192	-0.07153	-0.449878	0.847704	0.699366	-0.479871	-0.296298	0.007531	-0.566726	0.187987	0.275375	0.195195	0.072909	0.132502	0.333104	-0.659717	-0.423991	0.675066	0.369207	0.124971	0.89983
13437715	AT3G50460	3.3922	2.99803	2.58571	3.00049	3.8791	2.68199	3.98968	3.22433	3.01024	3.59433	3.07097	3.22494	4.75284	3.95023	3.12382	4.35607	3.3773	3.11501	4.56247	4.62547	3.54427	3.78249	3.76108	3.61799	1.36064	0.952202	0.538107	1.35558	-0.501803	0.433015	0.597475	0.226296	0.424529	0.593845	-0.808134	0.542951	-0.190374	0.675239	0.420449	-0.573575	0.38378	0.502985	-0.787849	0.448943	-0.00408	-1.16742	1.19191	-0.039966
13437818	AT3G50840	6.11668	7.3021	6.44003	6.32232	6.8741	6.39417	6.56365	6.63525	5.85879	6.32416	6.64464	6.32507	6.22626	5.8801	6.11624	5.5765	5.88509	5.89436	5.69328	5.80474	5.86359	5.71551	5.87515	5.5909	0.10958	-1.422	-0.323791	-0.745819	-0.989015	-0.499819	0.446973	-0.666853	-0.581243	0.001834	-0.229461	-0.069103	-0.532977	-0.075364	-0.25265	0.139007	-0.009937	-0.303456	-0.97995	0.591489	0.328593	0.137173	0.219524	-0.234353
13437883	AT3G51020	4.42419	4.64633	4.16924	4.50833	4.50833	4.7236	5.42431	6.01397	4.27365	4.60833	4.44216	5.07053	4.79569	4.79575	4.73784	4.53799	4.60831	4.5559	4.50439	4.11942	4.50833	4.27642	4.70653	4.22569	0.371505	0.149418	0.568604	0.029662	0.099983	-0.167696	1.00012	1.36764	0.104409	0.1	-0.066174	0.346928	-0.291297	-0.676326	-0.22951	-0.261577	0.098217	-0.330214	-1.29142	-2.04397	-0.333919	-0.361577	0.164391	-0.677142
13438146	AT3G51570	3.08425	3.42473	3.27144	3.54022	3.75419	4.03095	3.68333	3.63993	3.63983	3.47769	2.91026	3.60633	3.88215	3.68734	3.78225	4.39994	3.4264	4.14783	3.82913	3.71272	3.9198	3.77563	3.57842	3.43575	0.797899	0.262608	0.510806	0.859717	-0.327789	0.116878	0.599084	0.215194	0.368388	-0.062534	-0.843936	-0.424618	-0.053018	0.025378	0.137552	-0.624305	0.15202	-0.712072	-0.652102	-0.189816	-0.230836	-0.561771	0.995956	-0.287454
13438283	AT3G51930	5.26944	4.96045	5.30336	5.47674	5.96317	5.67936	4.43924	5.17828	4.72414	4.5585	5.52571	5.0828	5.03037	4.93984	4.97418	5.69792	5.56221	5.75666	5.13975	4.67313	4.08644	5.37631	5.71398	5.24531	-0.239069	-0.020606	-0.329175	0.221177	-0.400962	0.077304	-0.830202	0.217831	-0.579215	-0.91824	-0.437463	-0.59656	0.109379	-0.266717	-0.887744	-0.321606	0.151777	-0.511353	0.939581	-0.484548	-0.308529	0.596634	0.58924	0.085207
13438573	AT1G50070	4.59265	4.61479	4.73686	4.31339	4.88589	4.56648	4.01872	4.95707	4.39369	4.1579	4.56313	4.22236	4.47247	4.76703	4.39829	4.85704	4.39071	4.85985	4.72354	4.52253	4.73496	4.15594	4.74998	4.41005	-0.120185	0.152239	-0.338563	0.543648	-0.495178	0.293375	-0.573932	0.342276	-0.343169	-0.155488	-0.322756	-0.344119	0.251069	-0.244498	0.336666	-0.701097	0.359268	-0.449805	0.825001	-0.586774	0.679835	-0.545609	0.682024	-0.105686
13438884	AT3G53250	5.82576	8.80971	9.61025	7.06524	5.66403	5.22372	6.96469	8.87178	8.6096	6.41306	4.26543	4.00539	5.01323	8.48973	8.42561	5.72352	5.06117	5.04193	5.59087	8.05127	8.64133	5.64011	4.39991	4.3392	-0.812529	-0.319978	-1.18463	-1.34172	-0.60286	-0.181785	1.13893	0.062075	-1.00065	-0.652182	-1.3986	-1.21833	0.577637	-0.438459	0.215717	-0.083402	-0.661264	-0.702735	-0.56129	-0.500534	1.21637	0.56878	0.737339	0.515594
13439224	AT3G54160	3.8112	4.06782	4.21605	5.49149	4.21241	4.47791	4.48487	4.28181	4.18229	4.28058	3.84074	4.49436	4.91251	4.6793	5.75481	6.37231	5.73014	4.47874	4.81827	4.82092	4.7108	5.92665	5.49377	5.10641	1.10131	0.611477	1.53877	0.880812	1.51774	0.000829	0.673664	0.213987	-0.03376	-1.21092	-0.371665	0.016446	-0.094239	0.141623	-1.04402	-0.445653	-0.236371	0.627675	-0.767903	-0.072364	-1.01026	0.765263	0.135294	0.611229
13439349	AT3G54510	5.57433	5.09513	4.80932	4.85328	5.93025	5.38165	6.23452	5.3452	4.83152	4.82495	5.3976	4.85231	5.59642	5.40706	4.86951	4.9729	6.21929	5.11734	5.19086	5.13206	5.35961	4.79799	5.38181	4.73638	0.022094	0.311932	0.060191	0.11963	0.289043	-0.26431	0.660197	0.250076	0.0222	-0.028328	-0.532648	-0.529349	-0.405565	-0.274996	0.490096	-0.174913	-0.837484	-0.380962	-1.06576	-0.525072	0.467896	-0.146585	-0.304836	0.148387
13439434	AT3G54710	5.73034	5.03109	5.67876	5.87838	5.53212	5.69336	5.01232	5.60889	5.47321	5.59303	5.32171	4.97868	6.11848	5.9057	5.68995	6.31044	6.14267	6.41861	5.74484	5.93582	5.9749	6.46565	6.00884	6.20594	0.388146	0.874605	0.011188	0.432062	0.610555	0.725248	-0.718017	0.577793	-0.205555	-0.285348	-0.210409	-0.714677	-0.373645	0.030122	0.284951	0.155207	-0.133828	-0.212669	0.344372	-0.547671	0.490506	0.440555	0.076581	0.502008
13439640	AT3G55210	2.98983	3.46018	3.79089	4.06181	3.00471	3.97289	3.96139	3.54657	3.24725	3.35305	4.25126	4.11809	4.5953	4.02902	3.79835	3.58596	3.23766	3.79089	4.05784	4.08877	3.67694	3.70305	3.42131	3.76974	1.60547	0.568834	0.007459	-0.475849	0.232958	-0.182002	0.971559	0.086388	-0.543639	-0.708758	1.24656	0.145193	-0.537457	0.059757	-0.121407	0.117093	0.183647	-0.021157	-1.50902	-0.026631	0.422232	0.825851	-1.06291	-0.16635
13439783	AT3G55485	6.42366	5.86511	6.65154	6.08696	6.10768	5.36576	5.811	6.68379	6.09001	6.51889	6.01065	5.97893	6.18386	6.33767	6.7107	6.46977	6.19953	6.05449	5.95946	5.79722	5.76387	6.27546	6.55787	5.65124	-0.239802	0.472559	0.059162	0.382805	0.091853	0.68873	-0.612663	0.818683	-0.56153	0.431931	-0.097033	0.61317	-0.224402	-0.540453	-0.946829	-0.194312	0.35834	-0.403244	0.388261	-1.35914	-0.385299	-0.626243	0.455373	-1.01641
13439894	AT3G55650	3.21629	4.22517	3.30316	3.67827	3.72436	3.82132	3.81804	3.97417	3.54396	4.03846	3.95476	4.07265	3.86169	3.85125	3.87698	4.28703	3.94907	4.11564	4.46558	4.09768	3.83697	4.13019	4.03343	4.35658	0.645398	-0.373916	0.573828	0.608762	0.224708	0.294321	0.601754	-0.251001	0.240807	0.360186	0.230403	0.25133	0.603891	0.246429	-0.040014	-0.156843	0.084362	0.24094	0.002137	0.49743	-0.280821	-0.517029	-0.146041	-0.01039
13440028	AT3G55910	6.64159	6.69423	6.55321	5.62859	6.30582	6.9463	5.58	7.12158	6.87975	4.96869	6.69307	7.99155	5.00222	5.38931	5.65121	5.09743	5.47981	5.27184	4.95705	6.04604	5.4445	4.98108	5.48693	6.11725	-1.63937	-1.30492	-0.901995	-0.53116	-0.826011	-1.67446	-1.06159	0.427352	0.326542	-0.659896	0.387248	1.04525	-0.045169	0.656738	-0.206717	-0.116347	0.007125	0.845409	1.01642	0.229386	-0.533259	0.543549	-0.380123	-0.199843
13440125	AT3G56220	5.50602	4.5853	5.40071	4.90196	5.53872	4.43801	4.91937	4.0674	5.52136	4.39891	5.40412	4.35283	5.03479	5.08324	5.4914	5.54275	6.06783	6.11737	4.92485	5.68272	6.1063	5.71782	6.3231	5.98309	-0.471236	0.497933	0.090685	0.640793	0.529105	1.67936	-0.586647	-0.517907	0.120646	-0.503056	-0.134599	-0.085183	-0.109939	0.599487	0.614901	0.175064	0.25527	-0.134277	0.476708	1.11739	0.494255	0.67812	0.389869	-0.049094
13440185	AT3G56390	3.63155	4.56264	3.94514	4.37221	3.86766	4.36155	4.62934	4.18297	3.80137	4.41232	4.36487	4.05362	4.06078	4.70682	4.48541	4.96896	4.45893	4.16911	4.41509	4.19931	4.28661	4.61874	3.75961	4.14068	0.429228	0.144179	0.540266	0.596758	0.591276	-0.19244	0.997796	-0.37967	-0.143772	0.040111	0.497211	-0.307934	0.354316	-0.507511	-0.198796	-0.350218	-0.699321	-0.028432	-0.64348	-0.127841	-0.055024	-0.390329	-1.19653	0.279502
13440220	AT3G56540	4.02575	4.20988	4.84422	4.31829	3.95389	4.27926	4.77258	4.31829	4.11154	4.55281	4.01584	4.17565	4.75402	4.54194	4.54627	4.55748	4.20703	4.31829	4.27028	4.10285	4.7657	4.31829	4.09075	4.49675	0.728271	0.332065	-0.297949	0.239191	0.253139	0.03903	0.74683	0.108413	-0.732682	0.23452	0.061952	-0.10361	-0.483744	-0.439089	0.219428	-0.239191	-0.116274	0.178458	-1.23057	-0.547502	0.95211	-0.473711	-0.178226	0.282068
13440422	AT3G57110	5.70694	5.13033	5.26412	5.17623	5.11687	5.76713	4.88687	4.81382	4.84662	4.71121	5.23946	5.02608	5.2173	5.30437	5.56777	5.22494	5.84746	5.33829	5.64238	5.14544	5.48049	4.71377	5.92073	5.75071	-0.489635	0.174045	0.303654	0.048712	0.730589	-0.428842	-0.820068	-0.316511	-0.417494	-0.465016	0.122593	-0.741055	0.425074	-0.158928	-0.087278	-0.51117	0.073275	0.412421	1.24514	0.157583	0.330216	-0.046154	-0.049318	1.15348
13440444	AT3G57200	4.81191	4.44631	4.41835	4.73511	4.85607	5.01532	4.2371	5.00252	4.04943	4.4307	4.83816	4.70887	5.69995	5.58151	6.16345	5.80519	5.19669	5.96491	5.58102	5.62409	5.61949	5.85861	5.86045	5.91616	0.888042	1.1352	1.7451	1.07009	0.340624	0.949586	-0.574811	0.556214	-0.368923	-0.304406	-0.017912	-0.306459	-0.118931	0.042582	-0.543959	0.053419	0.663753	-0.048749	0.45588	-0.513632	-0.175036	0.357825	0.681665	0.25771
13440532	AT3G57360	6.56587	6.56086	7.06715	6.92851	5.48011	5.71827	5.98091	6.78953	7.24685	6.92706	6.08076	6.50881	6.1151	6.75621	6.87853	6.66798	6.00005	5.90772	6.07793	6.51718	7.06378	7.01124	5.81432	5.89808	-0.450768	0.195353	-0.188615	-0.260537	0.51994	0.189449	-0.584955	0.228679	0.179703	-0.001457	0.600653	0.790537	-0.037166	-0.239032	0.185249	0.343264	-0.185723	-0.009644	0.547789	-0.467711	0.005546	0.344721	-0.786376	-0.800181
13440616	AT3G57600	5.0115	5.5814	6.09667	5.18762	5.3014	4.91332	5.61175	5.2082	5.53225	5.13036	6.02018	5.12766	5.82057	6.04351	5.66393	6.00218	6.47491	6.45956	6.03587	6.39478	6.4795	6.02032	6.55299	6.04896	0.809071	0.462111	-0.432737	0.814563	1.17351	1.54624	0.600253	-0.373203	-0.564415	-0.057264	0.718781	0.214335	0.2153	0.351264	0.815566	0.018136	0.078081	-0.410599	-0.384953	0.724467	1.37998	0.0754	-0.6407	-0.624934
13441211	AT3G59200	4.03197	3.97025	4.16202	3.39648	4.03161	3.76644	3.45013	4.14784	3.61432	3.43445	3.65947	4.02039	3.70484	4.29833	4.31097	3.35899	3.37024	3.39467	3.65806	3.52901	3.15982	3.71116	3.94198	3.66976	-0.327123	0.328078	0.148951	-0.037484	-0.661378	-0.371762	-0.581835	0.177595	-0.547702	0.037975	-0.372145	0.253955	-0.046779	-0.769321	-1.15115	0.35217	0.571743	0.275084	0.535056	-0.946916	-0.603449	0.314195	0.943888	0.021129
13441818	AT3G60580	5.92562	5.23072	5.20114	5.4316	5.08177	4.72315	5.2556	4.91964	5.14914	4.99458	5.28196	5.24464	6.51098	6.04814	6.3366	6.45551	6.15848	6.60464	6.82974	6.86764	6.75709	7.03756	6.2501	6.47405	0.585366	0.817425	1.13546	1.0239	1.07671	1.88149	-0.67002	-0.311077	-0.052002	-0.437021	0.200183	0.521495	0.318755	0.819496	0.420498	0.582049	0.091617	-0.130584	0.988775	1.13057	0.4725	1.01907	-0.108566	-0.652079
13441859	AT3G60647	3.46019	4.37258	4.78096	4.75385	4.85635	5.04921	4.32427	5.85089	4.01363	4.31745	3.2398	4.31745	4.00391	3.73814	3.99867	4.25306	3.86407	4.31745	4.18339	3.75882	4.40303	3.94337	4.80267	4.10209	0.543718	-0.634439	-0.782295	-0.50079	-0.992284	-0.731767	0.864074	1.47831	-0.767336	-0.436407	-1.61656	-0.731767	0.179476	0.020684	0.404362	-0.309688	0.938602	-0.215357	-0.684598	-1.45762	1.1717	0.126719	2.55516	0.51641
13441861	AT3G60650	4.70152	5.23043	5.26682	5.12875	5.50315	5.33522	5.40572	5.62399	4.2411	5.04774	3.46715	4.57515	3.79966	3.55977	4.3313	4.46271	4.57515	4.06171	4.08085	3.89424	3.94964	3.41277	4.78291	4.24514	-0.90186	-1.67066	-0.935517	-0.666043	-0.927992	-1.27351	0.704205	0.393565	-1.02572	-0.081006	-2.03599	-0.760067	0.281188	0.334473	-0.381667	-1.04994	0.207755	0.183428	-0.423017	-0.059092	0.644057	-0.968933	2.24375	0.943495
13441863	AT3G60660	7.16579	6.38372	6.87197	6.91848	6.94238	6.59053	6.45865	6.21333	6.20223	6.73196	7.0133	7.1756	5.63402	6.10292	6.005	6.48991	5.75021	6.46072	5.49843	5.5273	6.03959	6.21719	6.18883	6.83361	-1.53177	-0.280799	-0.866962	-0.428569	-1.19216	-0.129809	-0.707144	-0.170385	-0.669733	-0.186518	0.070921	0.585078	-0.135589	-0.575622	0.034586	-0.272719	0.43862	0.372891	0.571555	-0.405237	0.704319	-0.086201	0.367699	-0.212187
13441883	AT3G60700	5.19451	4.66413	3.68085	3.594	3.19085	3.39497	4.46784	3.72337	3.84215	3.39084	3.84163	3.13838	3.33734	3.11678	3.40425	3.34867	2.9167	3.18643	3.27211	4.07518	3.29673	3.62391	3.28014	3.11799	-1.85717	-1.54736	-0.2766	-0.245329	-0.274156	-0.208545	-0.726678	-0.940762	0.161305	-0.203155	0.65078	-0.256598	-0.065236	0.958407	-0.107517	0.275244	0.363441	-0.068438	0.661442	1.89917	-0.268822	0.478399	-0.287339	0.18816
13442002	AT3G60961	2.26802	2.6505	2.59096	2.30615	2.19326	3.29748	2.98675	2.47609	3.75699	2.3301	2.8913	3.26495	2.50914	3.74328	3.72169	3.15497	3.47018	3.04774	2.82128	4.46437	4.28904	2.85464	3.08417	2.95833	0.241127	1.09278	1.13073	0.848819	1.27692	-0.249747	0.718739	-0.174405	1.16603	0.023945	0.698037	-0.032537	0.312142	0.721095	0.567354	-0.30033	-0.386011	-0.089409	-0.406597	0.8955	-0.598679	-0.324275	-1.08405	-0.056872
13442021	AT3G61030	2.95343	3.30782	3.20599	3.64064	3.03611	3.0202	3.62957	3.49893	5.77988	3.07643	2.97552	3.02634	8.07941	8.80893	8.92497	8.71199	8.76314	8.12259	8.14684	8.83288	8.74334	8.74829	8.63215	8.51033	5.12597	5.50111	5.71898	5.07135	5.72702	5.1024	0.676133	0.191107	2.57389	-0.564207	-0.060591	0.00614	0.067438	0.023953	-0.181631	0.036306	-0.13098	0.387742	-0.608695	-0.167154	-2.75552	0.600513	-0.070389	0.381602
13442441	AT3G61840	4.59755	3.71219	3.94984	4.08323	3.78719	3.24554	3.90855	3.75347	3.138	3.63818	3.72278	3.8461	3.45064	3.04641	2.94625	3.00637	3.33244	3.0542	3.48059	3.05245	3.02649	3.45188	3.01197	3.04433	-1.14692	-0.66578	-1.00359	-1.07687	-0.454753	-0.191341	-0.68901	0.041284	-0.811843	-0.445053	-0.064416	0.600566	0.029949	0.006043	0.080234	0.445519	-0.320469	-0.009868	0.718959	-0.035241	0.892077	0.890572	-0.256053	-0.610434
13443004	AT3G01015	4.97672	4.3014	4.27865	4.2217	4.23264	3.87488	4.11263	4.779	3.89342	4.38043	4.36916	3.73141	4.86531	4.04088	4.17218	5.48014	4.1797	4.83593	4.52654	4.21272	4.89035	4.32775	4.19651	4.63672	-0.111401	-0.260519	-0.106472	1.25845	-0.052945	0.961049	-0.864085	0.477607	-0.385234	0.158734	0.136511	-0.143469	-0.338777	0.171838	0.718177	-1.15238	0.016816	-0.199211	0.525308	-0.305769	1.10341	-1.31112	-0.119695	-0.055742
13443195	AT3G01328	3.97131	3.51433	3.5381	4.17191	4.29309	4.24797	3.33851	3.28618	3.57823	3.4643	3.99892	4.51916	3.82367	4.27173	3.9074	4.01434	3.76743	3.95961	3.75026	3.98417	3.94947	4.06167	3.44418	4.36519	-0.147641	0.7574	0.369307	-0.157576	-0.52566	-0.288362	-0.6328	-0.228145	0.040134	-0.707609	-0.294168	0.271185	-0.073409	-0.287558	0.042062	0.047332	-0.323247	0.405581	0.559391	-0.059413	0.001928	0.754941	-0.029079	0.134396
13443201	AT3G01323	2.63189	2.89748	2.56717	2.57303	3.07498	2.86223	3.22133	2.90223	2.70392	3.0049	2.86223	2.86223	2.82283	3.37868	2.88112	3.11635	2.86223	2.89523	3.45151	2.62108	2.73356	3.00487	3.01838	2.81867	0.190941	0.481198	0.313948	0.543316	-0.212749	0.033003	0.58944	0.004742	0.13675	0.43187	-0.212749	0	0.628683	-0.7576	-0.147561	-0.111478	0.156149	-0.076561	0.039243	-0.762342	-0.284311	-0.543348	0.368898	-0.076561
13444091	AT3G03456	2.87773	3.17847	2.82059	2.91609	3.09594	3.14285	3.57372	3.29594	3.66579	3.02459	2.94596	3.19385	3.60095	3.58308	3.26248	3.02359	3.10682	3.19385	3.45348	3.49321	3.36306	3.30179	3.14449	3.14432	0.723216	0.404616	0.441891	0.107495	0.010881	0.050999	0.69599	0.117471	0.8452	0.1085	-0.149974	0.050999	-0.147473	-0.089873	0.100579	0.278202	0.037674	-0.049525	-0.843463	-0.207344	-0.744621	0.169702	0.187648	-0.100524
13444243	AT3G03726	3.47405	3.3893	3.6289	3.12759	4.00119	3.09514	4.10355	3.68949	3.72784	3.666	3.4207	3.0966	3.58276	3.6329	3.59356	3.80096	4.13183	3.59356	3.30393	4.11014	3.59356	3.59356	4.13112	3.26863	0.108712	0.2436	-0.035337	0.673372	0.130639	0.498424	0.629496	0.300183	0.09894	0.538404	-0.580494	0.001463	-0.278833	0.477241	0	-0.207402	-0.000706	-0.324935	-0.908329	0.177058	-0.09894	-0.745806	0.579788	-0.326398
13444357	AT3G04010	6.09707	6.33063	5.82968	5.26517	4.95362	5.26279	6.69121	6.53809	6.27675	5.6888	4.74574	5.74118	7.80854	7.47491	6.99564	7.03209	6.61098	7.03099	8.0466	7.80143	6.96859	7.09	6.89321	7.70183	1.71147	1.14428	1.16596	1.76692	1.65736	1.7682	0.594136	0.207465	0.447067	0.423629	-0.207876	0.478384	0.238056	0.326525	-0.027057	0.057909	0.282225	0.670838	-0.35608	0.11906	-0.474124	-0.36572	0.490101	0.192454
13444951	AT3G05300	5.83828	6.2746	6.34944	6.1763	5.32597	6.33428	6.50172	6.64319	5.39818	5.49246	5.39627	6.77559	5.50689	5.93532	5.63443	4.98438	5.94541	6.05453	5.72514	5.20378	5.3778	5.07755	6.18426	5.95479	-0.331396	-0.339285	-0.715011	-1.19192	0.619436	-0.279757	0.663435	0.368592	-0.951258	-0.683834	0.070299	0.441303	0.218256	-0.731531	-0.25663	0.09317	0.238848	-0.099735	-0.445179	-1.10012	0.694628	0.777004	0.168549	-0.541038
13445044	AT3G05600	8.40521	7.69144	8.41751	8.26046	7.78542	7.90875	7.56175	7.40485	7.52134	7.40871	7.58429	6.6897	8.65881	8.6223	8.40888	9.1269	9.25564	9.05211	8.40438	8.25931	8.44223	9.24931	8.84947	9.01796	0.253599	0.930863	-0.008632	0.866446	1.47022	1.14336	-0.843465	-0.286587	-0.896177	-0.851741	-0.201131	-1.21905	-0.254431	-0.362996	0.033346	0.122413	-0.406177	-0.034157	0.589034	-0.076409	0.929523	0.974154	-0.205046	1.18489
13445383	AT3G06100	5.71719	4.90016	4.78078	5.34802	5.15841	4.77354	5.04549	5.11586	5.101	5.44607	4.71504	5.1342	5.46656	5.73527	5.52428	5.80431	5.00317	4.56341	5.01217	5.07184	5.83288	5.38432	5.00494	4.82853	-0.250625	0.835114	0.743498	0.456289	-0.155239	-0.21013	-0.671696	0.215695	0.320214	0.098055	-0.443367	0.360662	-0.454394	-0.66344	0.3086	-0.419981	0.001768	0.265118	0.217302	-0.879135	-0.011614	-0.518036	0.445135	-0.095544
13445958	AT3G07130	6.12296	5.57657	5.67753	6.25413	6.06358	6.72064	5.54862	6.15667	6.01694	6.31933	6.4933	5.88952	6.15578	6.29326	5.98091	6.58891	6.71623	6.28341	6.11182	5.90027	6.3876	6.28068	6.59496	6.62148	0.032821	0.716695	0.303378	0.334775	0.652655	-0.437227	-0.57434	0.580098	0.339404	0.065194	0.429724	-0.83112	-0.043967	-0.392998	0.406688	-0.308229	-0.121274	0.338066	0.530373	-0.973096	0.067284	-0.373423	-0.550998	1.16919
13446085	AT3G07290	5.02325	5.09157	5.32348	5.22207	3.76976	5.16239	4.23116	5.28147	4.77793	5.0654	4.43228	4.81346	4.69196	5.1926	5.0411	5.20636	4.8534	5.27177	4.78749	5.016	5.69697	5.01937	4.98287	5.06019	-0.331284	0.10103	-0.28238	-0.015704	1.08364	0.109376	-0.792083	0.1899	-0.545551	-0.15667	0.662522	-0.348932	0.095523	-0.176599	0.655862	-0.18699	0.12947	-0.211578	0.887606	-0.366499	1.20141	-0.03032	-0.533052	0.137354
13446140	AT3G07380	4.79201	5.42813	5.9946	5.52413	4.6367	5.24655	5.51012	5.87585	4.72458	5.53199	5.65561	5.52899	5.42348	5.29461	5.51394	6.18124	5.8633	5.34253	4.91777	5.72016	5.24478	5.32261	5.18415	5.66204	0.63147	-0.133517	-0.480662	0.657113	1.22659	0.095973	0.718102	0.447727	-1.27003	0.007866	1.01891	0.282431	-0.505715	0.425552	-0.269157	-0.85863	-0.679148	0.31951	-1.22382	-0.022175	1.00087	-0.866496	-1.69806	0.037079
13446314	AT3G07840	2.59661	2.94729	3.30082	3.37808	2.97419	2.67028	3.31037	3.30669	2.90408	3.26515	2.9882	2.49593	3.19312	3.21472	3.45127	2.75102	2.6243	3.07545	3.44008	2.7595	2.87924	3.12769	2.67899	2.89198	0.596504	0.267427	0.150448	-0.62706	-0.349893	0.405169	0.713754	0.359403	-0.396737	-0.112937	0.014005	-0.174356	0.246963	-0.45522	-0.572028	0.376668	0.054684	-0.183474	-0.466791	-0.814623	-0.175291	0.489605	0.040679	-0.009118
13446744	AT3G09120	3.19511	3.98733	4.20759	3.84547	3.99162	4.34997	4.01154	4.25257	3.66464	3.91302	3.51912	4.03395	3.57338	3.68493	3.7002	3.31109	3.34908	3.5188	3.93061	3.42113	3.31961	3.27207	3.79121	3.50807	0.378277	-0.302407	-0.507388	-0.534382	-0.642542	-0.83117	0.816437	0.265237	-0.542951	0.067552	-0.472501	-0.316021	0.357222	-0.263799	-0.380596	-0.039019	0.442129	-0.010727	-0.459215	-0.529036	0.162355	-0.106571	0.91463	0.305294
13446806	AT3G09260	8.32811	7.91714	8.63786	8.60795	8.34376	8.27323	9.28673	7.56928	8.55721	7.89502	8.29899	8.69434	8.07487	8.26632	8.9735	8.82344	9.03692	8.69192	8.55076	8.22035	8.86074	8.72451	9.39983	8.6	-0.253236	0.349171	0.335634	0.215488	0.693151	0.418691	0.95862	-0.347863	-0.08065	-0.712929	-0.044779	0.421115	0.475889	-0.045961	-0.112757	-0.098931	0.362912	-0.091919	-0.482731	0.301902	-0.032107	0.613998	0.407691	-0.513034
13446826	AT3G09280	4.2123	3.97316	3.56294	4.04124	3.92463	3.75178	3.50673	3.68122	3.92934	4.03037	3.80985	4.36743	4.08174	3.55238	4.26238	4.93482	4.09813	4.2968	4.08254	4.6781	4.29292	4.22475	4.11332	4.75606	-0.130561	-0.420778	0.699447	0.893587	0.173493	0.545017	-0.705569	-0.291945	0.366408	-0.010866	-0.11478	0.615646	0.000807	1.12572	0.030538	-0.710079	0.01519	0.459256	0.706376	1.41767	-0.33587	-0.699213	0.12997	-0.15639
13446972	AT3G09660	5.66191	6.40682	6.19982	6.36007	6.1252	6.42359	6.25633	5.98863	6.03181	5.85573	6.46315	6.43624	6.50061	6.52392	6.47014	6.17212	6.78344	6.55299	6.14795	6.28102	6.81396	6.37483	6.49034	6.44799	0.8387	0.117098	0.270315	-0.187956	0.658236	0.129404	0.594418	-0.418196	-0.168016	-0.504341	0.337949	0.012654	-0.352659	-0.242898	0.343822	0.202713	-0.293093	-0.105001	-0.947077	0.175298	0.511838	0.707054	-0.631042	-0.117655
13447440	AT3G10585	4.12337	4.65628	4.93221	4.00783	4.21636	4.71812	3.51002	4.92638	3.75124	4.55765	3.67627	4.83275	4.44299	4.31798	4.61164	3.9127	4.23527	4.17376	4.33429	4.02951	3.20007	3.93028	4.91151	4.10358	0.319621	-0.338301	-0.320567	-0.095133	0.018911	-0.544359	-0.613348	0.270106	-1.18096	0.549815	-0.540085	0.114633	-0.108695	-0.288462	-1.41157	0.017577	0.676244	-0.070174	0.504653	-0.558568	-0.230605	-0.532238	1.21633	-0.184807
13448157	AT3G12070	5.23839	5.03864	4.76625	4.84286	4.58584	5.28626	4.56157	4.5764	5.18886	4.70789	4.99735	4.96366	5.81338	6.26951	5.67394	5.70791	5.93914	5.76025	5.89261	6.04275	6.39417	5.70365	5.95155	6.23953	0.574987	1.23087	0.907685	0.865053	1.3533	0.473994	-0.676816	-0.462241	0.422614	-0.134969	0.411512	-0.322603	0.079233	-0.22676	0.720233	-0.004264	0.012413	0.479282	0.756049	0.235481	0.297619	0.130705	-0.399099	0.801885
13448248	AT3G12203	2.61725	2.81324	2.76283	3.76442	2.65001	2.93709	3.70933	2.95555	2.84723	2.86424	2.67007	3.12121	3.52705	3.72438	3.15197	3.21073	3.78865	2.89125	3.04658	2.83772	3.15964	3.16799	3.7389	3.19644	0.909804	0.911135	0.389146	-0.553696	1.13864	-0.045832	1.09208	0.142305	0.084406	-0.900178	0.020064	0.184129	-0.480474	-0.886655	0.007661	-0.042736	-0.049751	0.305187	-1.57255	-1.02896	-0.076745	0.857442	-0.069815	0.121058
13448380	AT3G12430	3.37504	4.55065	4.20215	4.06561	4.20215	4.21432	4.01013	4.102	4.74646	4.12108	3.65929	4.33644	4.61403	4.98144	4.28841	4.19582	3.75072	4.79552	5.00257	4.51166	4.61689	4.43714	3.95377	4.12185	1.23899	0.430786	0.08626	0.130214	-0.451426	0.581197	0.635094	-0.448653	0.544312	0.055477	-0.542857	0.122121	0.388547	-0.469777	0.328481	0.24132	0.203052	-0.673666	-0.246547	-0.021124	-0.215831	0.185843	0.745909	-0.795787
13448383	AT3G12440	3.91644	4.40551	4.51276	4.38949	4.46351	4.58063	4.50604	5.13397	4.31493	4.06043	3.8052	4.52403	4.66349	4.09574	4.4803	4.61089	4.18657	4.57167	4.78503	4.08074	4.52268	4.53055	4.48791	4.91476	0.747045	-0.309769	-0.032454	0.221398	-0.276941	-0.008958	0.589597	0.728457	-0.197829	-0.32906	-0.658305	-0.056592	0.121544	-0.015	0.04238	-0.08034	0.301346	0.343089	-0.468053	-0.743457	0.240209	0.24872	0.959651	0.399681
13448385	AT3G12460	5.36589	4.99024	5.26395	5.01604	5.71196	5.3886	4.59856	4.72482	4.72553	5.05247	4.99265	4.04348	5.71382	4.68958	4.74109	4.88012	5.25761	5.78368	5.24845	5.12868	5.66928	5.51399	5.35703	5.15159	0.347932	-0.30066	-0.522866	-0.135918	-0.454347	0.395077	-0.767334	-0.26542	-0.53842	0.036428	-0.719312	-1.34512	-0.465368	0.439101	0.92819	0.633865	0.099422	-0.63209	0.301966	0.704521	1.46661	0.597437	0.818734	0.713031
13448447	AT3G12580	9.48229	10.6018	10.3983	6.25625	10.21	10.074	10.283	10.7437	10.8744	6.15801	10.5772	9.93741	10.2553	10.7625	10.4676	7.8104	10.7221	9.81643	10.8059	10.6985	10.6768	6.70047	10.6765	9.53271	0.772982	0.16071	0.06929	1.55415	0.51213	-0.257615	0.800682	0.14193	0.47614	-0.098232	0.3672	-0.136632	0.55061	-0.06397	0.20922	-1.10993	-0.04558	-0.283717	-0.250072	-0.2059	-0.26692	-1.0117	-0.41278	-0.147085
13448456	AT3G12585	4.98331	4.54726	5.26817	4.86171	5.43244	4.97446	5.71806	5.15231	5.46986	4.82584	5.08473	5.21694	5.50908	5.11909	5.08473	4.90848	5.08473	5.27136	5.05113	5.79107	6.08742	4.88863	4.93843	5.11926	0.525777	0.571832	-0.183437	0.046772	-0.347703	0.296901	0.734752	0.605054	0.20169	-0.035867	-0.347703	0.242472	-0.457957	0.671974	1.00269	-0.019853	-0.146308	-0.152106	-1.19271	0.06692	0.800998	0.016014	0.201395	-0.394578
13449125	AT3G13840	5.32145	5.4246	5.2443	4.75676	5.38697	6.51956	4.67841	6.13058	4.6935	5.51807	5.40368	5.56726	4.70756	4.76017	5.19916	5.35658	5.86374	5.39857	5.15253	5.04358	4.97991	4.95715	4.6422	5.41025	-0.613887	-0.664426	-0.04514	0.599818	0.476767	-1.12099	-0.643036	0.705984	-0.550802	0.761309	0.016709	-0.952293	0.444971	0.283409	-0.219253	-0.39943	-1.22154	0.011683	1.08801	-0.422575	0.331549	-1.16074	-1.23825	0.963976
13449401	AT3G14300	5.23123	4.65109	4.79959	5.00915	4.63591	4.96814	4.64746	4.56863	4.51723	4.90177	4.77434	4.67941	5.59379	4.63592	5.19065	4.97759	4.97847	4.66801	5.01481	4.81419	4.87517	4.70528	5.01717	4.88234	0.362556	-0.015166	0.391062	-0.03156	0.342552	-0.300132	-0.583771	-0.082459	-0.28236	-0.10738	0.138426	-0.28873	-0.578981	0.178274	-0.315479	-0.272317	0.038699	0.214326	0.00479	0.260733	-0.033119	-0.164937	-0.099727	0.503056
13449479	AT3G14460	5.84755	6.18935	6.1596	6.38626	6.42636	5.95968	6.45304	6.2686	6.35864	6.2487	6.50621	6.53622	7.28806	7.2836	7.16346	7.7315	7.56383	7.33991	7.53781	7.12187	7.35024	7.47448	7.35756	7.61128	1.4405	1.09424	1.00387	1.34523	1.13747	1.38023	0.605489	0.079244	0.199045	-0.137562	0.079849	0.57654	0.249751	-0.161728	0.18678	-0.257013	-0.206272	0.271365	-0.355738	-0.240972	-0.012265	-0.119451	-0.286121	-0.305175
13449491	AT3G14510	3.95977	3.86178	3.07625	4.01137	3.30894	3.92578	3.19342	2.97145	3.34522	4.3411	3.77427	3.19597	4.60249	3.84239	4.61255	4.65575	4.17944	4.1599	3.95637	4.74886	4.16829	3.83362	4.18366	3.97914	0.642721	-0.019393	1.5363	0.64438	0.870495	0.234122	-0.766345	-0.890333	0.26897	0.32973	0.465329	-0.72981	-0.646119	0.906472	-0.444269	-0.822132	0.004224	-0.18076	0.120226	1.7968	-0.713239	-1.15186	-0.461105	0.54905
13449516	AT3G14550	4.14158	3.64507	3.42661	3.3731	3.71074	3.57928	3.54198	3.28656	3.60639	3.64507	3.28656	3.6473	3.22831	3.84	4.2546	4.54277	3.97005	3.43045	3.69384	3.81274	4.03332	4.05529	3.76737	3.59705	-0.913271	0.194929	0.827987	1.16967	0.25931	-0.14883	-0.599598	-0.358513	0.179778	0.271973	-0.42418	0.068025	0.465529	-0.02726	-0.221275	-0.487479	-0.202678	0.166607	1.06513	0.331253	-0.401053	-0.759452	0.221502	0.098582
13449677	AT3G15150	6.28014	6.23814	6.73958	7.25115	6.88648	6.43928	6.87773	6.43318	6.39679	7.00632	6.80397	6.2613	6.47231	6.10204	6.62537	7.31726	7.14892	7.2033	6.43869	6.5779	6.64812	7.22693	7.11982	6.8873	0.192172	-0.136094	-0.114218	0.066111	0.262436	0.764023	0.597594	0.195041	-0.342799	-0.244825	-0.082516	-0.177974	-0.033625	0.47586	0.022757	-0.090323	-0.029093	-0.316001	-0.631219	0.280819	0.365556	0.154502	0.053423	-0.138027
13450123	AT3G16210	2.78856	3.33596	2.81815	3.15084	3.00189	2.98592	3.42011	3.0036	3.0164	2.90434	2.76444	2.94461	3.47382	2.95644	3.43507	3.74869	3.14279	3.52936	3.0797	3.39051	3.14179	3.51742	3.19709	3.50067	0.685257	-0.379522	0.616921	0.597852	0.140897	0.543438	0.631553	-0.332363	0.198251	-0.246501	-0.237447	-0.041306	-0.394121	0.43407	-0.293288	-0.231269	0.054301	-0.028684	-1.02567	0.766433	-0.491539	0.015232	0.291748	0.012622
13450330	AT3G16820	2.59239	2.94017	2.30267	2.06856	2.84529	2.36104	1.97859	2.16079	2.07373	2.27527	2.51164	2.22467	2.30809	2.65579	2.84517	2.61366	2.19127	2.58257	2.2858	2.30468	2.49601	2.36732	2.63976	2.1733	-0.284302	-0.28438	0.542498	0.545103	-0.654013	0.221534	-0.613796	-0.779377	-0.228944	0.206708	-0.333649	-0.136367	-0.022291	-0.351108	-0.349159	-0.246341	0.448489	-0.409266	0.591505	0.428269	-0.120215	-0.453049	0.782138	-0.272899
13450760	AT3G18120	2.70613	2.92561	2.73627	2.58844	3.18987	2.85401	3.71621	2.82468	2.95394	2.61851	2.72589	2.70613	2.78955	3.34945	3.19862	3.19516	3.0922	2.9496	3.23989	2.8097	3.30837	3.03555	3.29502	3.00453	0.083419	0.423839	0.462358	0.606724	-0.097671	0.095594	1.01008	-0.10093	0.217671	0.030071	-0.463985	-0.147878	0.450335	-0.539757	0.109747	-0.159606	0.202819	0.054925	-0.559747	-0.438827	-0.107924	-0.189677	0.666804	0.202803
13451197	AT3G19200	4.75605	3.15849	3.19824	3.39066	3.67038	2.66328	5.5947	3.401	3.35371	2.91307	3.38899	2.95093	3.03911	3.28176	3.35121	2.84093	3.40538	2.86407	3.31718	3.30129	3.21295	3.40538	3.57373	3.04519	-1.71694	0.123273	0.152961	-0.549726	-0.265001	0.200791	0.838641	0.242511	0.155465	-0.477585	-0.281392	0.287653	0.278063	0.019532	-0.138256	0.564452	0.168349	0.181118	-0.560578	-0.222979	-0.293721	1.04204	0.449741	-0.106535
13451308	AT3G19430	3.3794	4.0713	4.20163	4.22704	4.20427	3.92506	4.39632	4.50165	4.09546	4.11779	4.02952	3.97109	3.95503	4.19395	4.0491	4.41198	4.21873	4.24302	4.33186	3.88196	4.11054	4.16732	4.79748	4.32593	0.575624	0.122649	-0.152532	0.184942	0.014464	0.317954	1.01692	0.430349	-0.106171	-0.109248	-0.174744	0.046026	0.376836	-0.311996	0.061445	-0.244658	0.57875	0.082911	-0.64008	-0.742345	0.167616	-0.13541	0.753494	0.036885
13451334	AT3G19508	8.03365	8.41637	8.61263	8.29592	7.3952	7.62702	7.4092	8.62119	8.51179	7.86405	7.40779	7.74808	7.49913	8.29086	7.86039	8.0091	7.19157	7.2611	7.04124	8.11478	8.25533	8.0646	7.4184	7.73757	-0.534527	-0.125511	-0.752237	-0.286819	-0.203628	-0.365917	-0.624457	0.204822	-0.100839	-0.431866	0.012592	0.121064	-0.457881	-0.176079	0.394943	0.055496	0.226828	0.476466	0.166576	-0.380901	0.495782	0.487362	0.214236	0.355402
13451898	AT3G20700	2.02731	2.43679	2.7254	2.22712	2.1734	2.20141	2.64675	2.36896	2.41327	2.15114	2.30553	2.43679	2.41903	2.84124	2.43679	2.71045	2.2951	2.58652	2.72667	2.98192	2.27212	2.49568	2.4034	2.91514	0.391725	0.404457	-0.288617	0.483333	0.121704	0.385111	0.619438	-0.067824	-0.312134	-0.075975	0.13213	0.235377	0.307638	0.140679	-0.164665	-0.214766	0.108298	0.328616	-0.3118	0.208503	0.147469	-0.138791	-0.023832	0.093239
13451992	AT3G20885	4.31116	3.91831	3.92124	3.38499	4.06401	3.75333	3.52318	3.84611	4.01885	3.47995	3.97553	3.99174	4.11438	4.10906	5.22342	3.45831	3.99948	3.86172	3.91649	3.74916	4.12894	3.65596	4.2358	4.03824	-0.196782	0.190742	1.30218	0.073314	-0.064524	0.108391	-0.78799	-0.072206	0.097615	0.094951	-0.08848	0.238408	-0.197895	-0.359892	-1.09448	0.197647	0.236315	0.17652	0.590095	-0.287686	-1.19209	0.102696	0.324795	-0.061888
13452012	AT3G20997	2.62865	2.6497	2.14167	2.55748	3.46058	2.86802	3.27412	3.18341	2.42386	2.40882	2.8399	2.65211	3.48026	2.78352	3.12842	2.8399	3.14917	3.29732	2.86223	2.8399	3.51379	3.51742	4.51128	3.26597	0.851617	0.133813	0.986753	0.282418	-0.311412	0.429299	0.645479	0.533704	0.282188	-0.148663	-0.620683	-0.215908	-0.618034	0.056382	0.385368	0.677526	1.36211	-0.031344	-1.26351	-0.477322	0.10318	0.826189	1.98279	0.184564
13452264	AT3G21460	6.31042	4.71393	4.53285	5.26127	6.32042	4.9021	5.64243	4.99919	4.33782	5.08016	5.47227	4.65221	5.05897	4.15946	4.18912	5.19352	5.1168	4.86376	4.53123	3.89324	4.11013	4.30772	4.32186	4.65835	-1.25145	-0.554469	-0.343728	-0.067753	-1.20362	-0.038334	-0.667989	0.28526	-0.195033	-0.181114	-0.848149	-0.249888	-0.527744	-0.266223	-0.078995	-0.885796	-0.794937	-0.205415	0.140245	-0.551483	0.116038	-0.704682	0.053212	0.044473
13452289	AT3G21530	6.29949	5.43187	5.93135	5.97291	6.58196	5.44064	5.70883	5.91399	6.16219	6.23911	5.465	5.89943	7.30203	7.02021	6.91392	7.3025	7.28273	7.22337	6.89891	6.87319	6.9339	7.30444	7.57954	7.35188	1.00254	1.58834	0.982566	1.32959	0.700771	1.78273	-0.590656	0.48212	0.23084	0.266201	-1.11696	0.458785	-0.403115	-0.147023	0.019981	0.001943	0.29681	0.128507	0.187541	-0.629143	-0.210859	-0.264258	1.41377	-0.330278
13452393	AT3G21660	4.90523	5.10541	5.30943	5.61021	5.10697	5.64384	5.59447	5.21859	5.21572	4.87436	5.81571	6.19252	5.47664	5.16793	5.13027	4.76162	5.14846	5.54485	5.56984	5.32603	5.17594	5.33944	5.99133	6.51174	0.571412	0.062519	-0.179154	-0.848594	0.041491	-0.098986	0.689241	0.113185	-0.093708	-0.735848	0.708746	0.548688	0.093193	0.158099	0.045665	0.577824	0.842868	0.966886	-0.596048	0.044914	0.139373	1.31367	0.134122	0.418198
13452433	AT3G21780	5.93459	4.95015	5.0509	4.99776	4.867	4.73194	6.2732	5.42616	4.94594	5.49278	5.2032	5.37652	6.42082	5.66366	5.50916	5.82094	5.6204	5.49092	6.67297	6.0015	5.82463	6.08251	5.84386	5.93474	0.486226	0.713517	0.458263	0.823182	0.753395	0.758975	0.338606	0.476009	-0.104964	0.495027	0.336192	0.644574	0.252157	0.337837	0.315468	0.261574	0.223458	0.443821	-0.086449	-0.138172	0.420432	-0.233453	-0.112734	-0.200753
13452670	AT3G22700	3.07618	3.12198	3.5818	3.4236	3.69066	3.0446	3.81767	4.20357	3.18627	3.63712	2.96768	3.95206	3.11327	3.24332	2.91853	3.2031	3.11406	2.92133	2.62592	2.8739	3.24133	3.33535	2.87818	2.99431	0.037089	0.121338	-0.663267	-0.220504	-0.576608	-0.123267	0.741487	1.08159	-0.39553	0.213521	-0.722984	0.90746	-0.487347	-0.369421	0.322803	0.132252	-0.235876	0.072981	-1.22883	-1.45101	0.718333	-0.081269	0.487108	-0.834479
13452723	AT3G22860	2.91286	3.44283	4.01991	4.44295	4.05914	4.08116	3.96253	4.05837	3.06098	3.69204	3.31892	3.54063	3.75514	3.46892	3.47062	3.21674	2.86156	3.5939	3.87108	3.63475	3.77265	3.33763	3.36934	3.21892	0.842286	0.026083	-0.549286	-1.22621	-1.19758	-0.487252	1.04967	0.615542	-0.958932	-0.750908	-0.740225	-0.540522	0.115942	0.165837	0.30203	0.120887	0.507779	-0.374982	-0.933729	-0.449705	1.26096	0.871795	1.248	0.16554
13452829	AT3G23230	5.43905	5.53721	5.2235	5.8062	4.8499	4.89384	6.39625	5.54961	4.63261	6.18834	4.97524	4.35829	6.36998	5.38305	5.178	5.56184	5.50704	5.22368	6.9872	5.97767	4.97345	6.83912	5.22605	5.39919	0.93093	-0.154163	-0.045504	-0.244359	0.657141	0.329842	0.957204	0.012396	-0.590893	0.382132	0.125348	-0.535554	0.617225	0.59462	-0.204551	1.27727	-0.280987	0.175505	-0.339979	0.582224	0.386342	0.89514	-0.406335	0.711059
13453029	AT3G23950	2.61969	2.96231	2.67283	3.11326	2.83647	2.69156	3.29392	3.44876	2.92229	2.92229	2.88678	2.6635	3.64903	3.35056	3.16602	3.16899	2.72756	2.7254	3.54154	2.98224	2.66033	2.60271	2.75315	3.11306	1.02933	0.388252	0.493192	0.055725	-0.108905	0.033842	0.674231	0.486452	0.249463	-0.190973	0.050309	-0.028059	-0.107487	-0.368319	-0.505683	-0.566273	0.025587	0.387651	-0.781718	-0.854771	-0.755146	-0.3753	-0.024722	0.41571
13453083	AT3G24068	2.38635	2.79908	2.49267	2.49267	2.74545	2.57435	2.98926	2.61139	2.53375	2.3372	2.48705	2.43739	2.4276	2.2728	2.97449	2.45582	2.53843	3.13118	2.53053	2.2795	2.66851	2.28485	2.97168	2.49267	0.041246	-0.526277	0.481815	-0.036848	-0.207019	0.55683	0.60291	-0.187687	0.041076	-0.155466	-0.258398	-0.136956	0.102929	0.006696	-0.305977	-0.170976	0.433247	-0.638511	-0.499981	0.194383	-0.347053	-0.01551	0.691645	-0.501555
13453121	AT3G24130	3.49395	3.52353	3.47142	3.28737	2.89601	3.40322	2.86844	3.31361	2.89955	3.05562	2.82074	3.11825	3.29054	3.39936	3.24107	3.49465	3.34706	3.3346	3.18926	3.35502	3.24107	3.44035	3.49837	3.17443	-0.203417	-0.12417	-0.230348	0.207285	0.451055	-0.068624	-0.625518	-0.209923	-0.571874	-0.231744	-0.075268	-0.284971	-0.101277	-0.044338	0	-0.054304	0.151315	-0.160173	0.524241	0.165585	0.571874	0.17744	0.226583	0.124798
13453201	AT3G24216	5.22094	4.35253	4.85783	4.43802	4.05408	5.54906	4.13441	6.94136	4.92801	5.85545	4.59402	5.15643	4.88623	4.59721	5.01309	5.07644	3.66818	5.41439	5.27299	5.3826	4.50996	5.0317	5.11968	4.56435	-0.334714	0.244677	0.155263	0.638419	-0.385904	-0.134672	-1.08653	2.58883	0.070183	1.41743	0.539936	-0.392635	0.386768	0.785391	-0.503138	-0.044734	1.45151	-0.850037	1.4733	-1.80344	-0.573321	-1.46217	0.911572	-0.457402
13453373	AT3G24517	3.65697	2.56548	3.31203	3.53554	3.38254	3.10021	2.52143	2.62634	2.92592	2.60295	2.52045	2.40451	2.56232	2.50594	2.34832	2.58799	2.48044	2.26787	2.61616	2.48281	2.8539	2.4911	2.33093	2.56232	-1.09465	-0.05954	-0.963709	-0.947549	-0.902095	-0.832341	-1.13553	0.060863	-0.386112	-0.932596	-0.86209	-0.6957	0.05384	-0.023124	0.505575	-0.09689	-0.14951	0.294456	1.18938	-0.083987	0.891687	0.835706	0.71258	0.990156
13453377	AT3G24520	6.28586	6.81343	7.22184	8.07628	8.13584	8.43519	6.91683	6.87789	7.00153	7.60512	7.92677	7.79389	6.40431	7.19126	7.21496	7.68504	7.85837	7.62381	6.46898	7.02337	6.87122	7.24828	7.47974	7.27811	0.118449	0.377832	-0.006883	-0.391234	-0.277467	-0.811378	0.630971	0.064463	-0.22031	-0.471155	-0.209068	-0.641298	0.064668	-0.16789	-0.343738	-0.436763	-0.378629	-0.345699	-0.566303	-0.232353	-0.123428	0.034392	-0.169561	0.295599
13453517	AT3G25090	3.50652	4.2382	5.00117	5.2724	3.79286	4.16434	4.28118	4.14147	3.85737	4.67184	4.45147	4.42414	4.55778	4.79061	4.08323	3.80958	4.83325	4.695	4.85581	4.33456	4.16204	3.60654	3.72729	4.25928	1.05126	0.552406	-0.917934	-1.46283	1.04039	0.530659	0.774662	-0.096729	-1.1438	-0.600558	0.658613	0.259799	0.298035	-0.456054	0.078811	-0.203033	-1.10596	-0.435718	-0.476627	-0.359325	1.22261	0.397525	-1.76457	-0.695517
13453521	AT3G25099	3.54193	3.80867	3.7226	3.29423	3.11089	3.8455	2.87264	3.75702	3.32193	3.68634	3.25722	3.54464	3.12317	2.99903	3.06148	3.12993	2.81296	2.80142	2.87841	3.06113	2.98009	3.22953	2.68475	2.97675	-0.41876	-0.809635	-0.661122	-0.164295	-0.297927	-1.04408	-0.669293	-0.051644	-0.40067	0.392112	0.146331	-0.300863	-0.244765	0.0621	-0.081394	0.099592	-0.128208	0.175322	0.424528	0.113744	0.319276	-0.29252	-0.274539	0.476185
13453555	AT3G25160	2.92115	3.06849	3.03002	3.25146	2.90737	2.74173	3.55843	3.27939	2.79636	2.94495	2.81896	2.85993	3.22897	3.30047	2.99512	2.78997	3.03002	3.19288	3.08846	3.08535	3.61836	2.7993	3.16392	3.02277	0.307825	0.231981	-0.034903	-0.461489	0.122658	0.451154	0.637282	0.210902	-0.233664	-0.306505	-0.088409	0.1182	-0.140512	-0.215113	0.623236	0.00933	0.133898	-0.170107	-0.777794	-0.426015	0.8569	0.315835	0.222307	-0.288307
13453685	AT3G25655	3.1807	3.47247	2.82344	2.76497	2.7968	2.65529	2.54837	2.86864	2.59961	2.72908	2.82344	2.70765	2.7872	2.78419	2.87354	2.87211	2.82344	2.83904	2.74773	2.91192	2.91542	2.63795	2.82344	2.90723	-0.393507	-0.688281	0.050094	0.107141	0.026645	0.183748	-0.632329	-0.603831	-0.223831	-0.035888	0.026645	0.052363	-0.039468	0.127735	0.041882	-0.234163	0	0.06819	0.592861	0.731566	0.265713	-0.198275	-0.026645	0.015827
13453760	AT3G25850	4.12527	3.48314	3.19303	2.62319	3.34111	3.67912	3.40492	3.43402	2.82992	3.34743	3.34743	3.53548	3.29014	3.91854	3.24402	3.40521	3.60139	3.88396	3.38515	3.5335	3.37615	3.27601	4.08742	3.16709	-0.835128	0.435403	0.050998	0.782012	0.260279	0.204834	-0.720347	-0.04912	-0.363108	0.724235	0.006322	-0.14364	0.095007	-0.385043	0.132128	-0.1292	0.486038	-0.71687	0.815354	-0.335923	0.495236	-0.853435	0.479716	-0.57323
13453880	AT3G26320	6.21117	6.52576	6.35479	6.91736	6.77096	6.84585	6.9436	6.35477	6.71823	6.55569	6.64836	6.82167	7.23736	6.6127	6.98075	7.53538	7.1255	7.20345	7.18855	6.77719	7.06865	7.2744	7.09999	7.07712	1.02619	0.086939	0.625961	0.618021	0.354542	0.357601	0.732434	-0.17099	0.363436	-0.361669	-0.122606	-0.024182	-0.048819	0.164499	0.087904	-0.260988	-0.025519	-0.126325	-0.781253	0.335489	-0.275532	0.100681	0.097087	-0.102143
13453906	AT3G26390	3.70976	3.54022	3.78297	3.92463	3.9471	3.83027	4.32916	3.99385	3.82478	3.83586	4.03378	3.70588	4.28186	3.89109	3.82478	3.85922	3.60175	4.12186	3.82478	4.26194	3.93556	3.91668	3.88505	3.68421	0.572099	0.350871	0.04181	-0.065416	-0.345355	0.291593	0.619404	0.453628	0.04181	-0.088773	0.086676	-0.124387	-0.45708	0.370849	0.11078	0.057458	0.2833	-0.437657	-1.07648	-0.082779	0.06897	0.146231	0.196624	-0.31327
13454422	AT3G27410	3.31431	3.85979	4.16047	4.24989	4.40507	4.26809	4.01103	3.54761	3.73993	3.71001	4.23722	4.37678	3.65465	4.31583	4.25157	4.14822	4.87956	4.16193	3.63189	4.10534	4.48484	4.94247	4.15597	5.27905	0.34034	0.456048	0.091101	-0.101678	0.474489	-0.106169	0.696722	-0.312179	-0.420533	-0.539884	-0.16785	0.10869	-0.022762	-0.210498	0.233278	0.79425	-0.723583	1.11712	-0.719484	0.101681	0.653811	1.33413	-0.555733	1.00843
13454438	AT3G27473	4.92232	4.61482	4.17622	4.3887	5.54205	4.74438	3.88674	5.15723	5.65314	4.19339	3.97907	4.29532	8.30312	7.931	8.2071	8.89449	8.83669	8.78157	8.67147	7.99698	8.1695	8.86855	8.75866	8.3196	3.3808	3.31618	4.03087	4.50579	3.29464	4.0372	-1.03558	0.542405	1.47692	-0.195317	-1.56297	-0.449056	0.368356	0.065986	-0.037596	-0.025939	-0.07803	-0.461976	1.40394	-0.476419	-1.51451	0.169378	1.48494	-0.01292
13454606	AT3G27800	4.21294	4.49792	3.93423	3.98158	4.36071	3.79835	3.47894	4.38708	3.34992	3.666	3.0361	4.71625	4.26117	4.40762	4.24418	4.25588	3.84985	4.657	4.29797	3.87684	3.53753	3.71976	4.77862	3.42783	0.048229	-0.090298	0.309951	0.274299	-0.510861	0.858643	-0.734003	-0.110836	-0.584306	-0.315587	-1.32461	0.917899	0.036801	-0.530777	-0.706648	-0.536121	0.928778	-1.22917	0.770804	-0.419941	-0.122342	-0.220534	2.25338	-2.14707
13454613	AT3G27831	5.09161	4.9069	6.19073	6.42333	5.93299	4.90838	5.81612	5.56961	5.7511	6.60008	6.10324	5.33818	6.18865	6.27042	6.05552	6.79492	6.27422	6.32476	5.89367	5.77911	6.31844	6.11592	6.43781	5.56203	1.09704	1.36352	-0.135202	0.371584	0.341231	1.41638	0.724512	0.662712	-0.439626	0.176743	0.170246	0.429796	-0.294983	-0.491307	0.262919	-0.678997	0.163584	-0.762727	-1.0195	-1.15402	0.702545	-0.85574	-0.006662	-1.19252
13454616	AT3G27835	2.85102	2.85305	2.66965	3.39837	3.70051	3.31505	3.73621	2.6894	2.61566	3.38128	2.75047	3.54963	3.48555	3.5588	2.77105	4.56753	3.33863	3.31657	3.58744	3.18939	3.28014	3.76166	3.37227	3.43509	0.634534	0.705745	0.101404	1.16916	-0.361873	0.001519	0.885187	-0.163648	-0.053988	-0.017088	-0.950033	0.23458	0.101881	-0.36941	0.509089	-0.805868	0.033638	0.118516	-0.783306	-0.205762	0.563077	-0.78878	0.983671	-0.116064
13454637	AT3G27920	5.45655	5.01268	4.7443	4.94065	4.73565	4.7073	4.6786	4.54591	3.93612	4.50257	4.96311	5.09272	4.49583	4.79856	5.0262	4.94236	5.87591	5.03511	4.67575	4.89491	3.98421	4.74582	5.1472	4.89623	-0.960728	-0.214117	0.281893	0.001705	1.14026	0.327813	-0.777956	-0.466769	-0.808184	-0.438077	0.227457	0.385421	0.179919	0.096348	-1.04199	-0.196539	-0.728715	-0.138879	0.957875	0.563117	-0.233802	0.241538	-0.956172	-0.5243
13454675	AT3G27968	5.35219	5.07369	4.62253	4.55996	4.63612	5.35653	5.9729	5.58332	5.00424	4.72944	4.95226	5.5848	4.9519	4.71853	4.68521	4.89657	4.80158	4.96322	4.69446	4.88682	5.10153	4.88863	4.7173	4.66863	-0.400284	-0.355158	0.062677	0.336608	0.165459	-0.393308	0.62072	0.50963	0.381711	0.16948	0.316148	0.228267	-0.257437	0.168291	0.416326	-0.007945	-0.084275	-0.294593	-0.878157	-0.341339	0.034615	-0.177425	-0.400423	-0.52286
13454705	AT3G28155	5.16012	4.38639	4.66813	4.91225	4.75318	4.88744	4.22249	4.31196	4.7022	4.54874	3.89513	2.876	5.39359	6.09789	6.01565	5.84654	6.27844	5.3705	5.14277	5.45103	5.54855	5.47637	5.89294	5.19455	0.233466	1.71149	1.34752	0.934291	1.52526	0.483064	-0.937638	-0.074432	0.034076	-0.363511	-0.858048	-2.01144	-0.25082	-0.646856	-0.467101	-0.370175	-0.385498	-0.17595	0.686818	-0.572424	-0.501177	-0.006664	0.47255	1.83549
13454907	AT3G28810	2.92997	3.23813	2.67432	3.43795	2.98626	3.44589	3.58167	3.29537	3.42328	3.39663	3.46898	3.12797	3.99658	3.69286	4.33	3.77321	3.16823	3.5078	4.20307	3.49295	3.93305	3.59412	3.06784	4.12294	1.06661	0.454728	1.65568	0.335263	0.181964	0.061916	0.651699	0.057241	0.74896	-0.041318	0.482717	-0.317918	0.206497	-0.199912	-0.396955	-0.179091	-0.10039	0.615136	-0.445202	-0.257153	-1.14592	-0.137773	-0.583107	0.933054
13455390	AT3G31068	5.43686	6.5181	6.1764	5.58925	5.9566	6.51506	4.56897	6.02949	3.8213	5.66428	4.84403	6.61049	3.04047	3.50881	3.2199	3.48162	2.97984	3.16378	3.15067	3.25167	3.37637	3.1955	3.04544	3.47378	-2.39639	-3.00929	-2.95649	-2.10764	-2.97677	-3.35129	-0.867891	-0.488614	-2.35509	0.075025	-1.11257	0.095425	0.110203	-0.257145	0.156468	-0.28612	0.065601	0.31	0.978094	0.231469	2.51156	-0.361145	1.17817	0.214575
13455413	AT3G32030	2.58835	2.76876	3.58198	3.26773	2.41205	3.17681	3.19812	3.6814	3.32328	2.94182	3.28702	2.88336	2.76841	2.92097	3.20827	3.32097	2.96332	3.36306	3.23443	3.53196	3.53412	3.28702	3.12258	3.23807	0.180062	0.152205	-0.373703	0.053234	0.551262	0.186242	0.609766	0.912637	-0.258696	-0.32591	0.874965	-0.293454	0.466014	0.610994	0.325845	-0.033949	0.159262	-0.124987	-0.143752	-0.301643	0.584541	0.291961	-0.715703	0.168467
13455549	AT3G42155	4.67662	5.4412	5.73358	5.21382	4.76596	5.31266	5.4129	5.07441	4.72299	4.88087	4.9024	4.52361	5.02163	5.47786	5.30356	5.0456	5.37186	5.02364	4.8944	5.01661	4.55125	5.01485	5.24439	4.97851	0.345005	0.036655	-0.430028	-0.168225	0.605901	-0.289025	0.73628	-0.36679	-1.01059	-0.332955	0.136436	-0.789051	-0.12723	-0.461243	-0.752303	-0.030753	-0.127475	-0.04513	-0.86351	-0.094453	0.258288	0.302202	-0.263911	0.743921
13455769	AT3G43410	3.09126	2.83177	2.52567	2.65707	3.05687	2.73142	2.30887	3.09729	2.66365	2.60562	2.82814	3.04116	3.0346	2.36937	2.91003	3.37616	2.6451	2.55925	3.26113	2.63421	3.15488	2.47761	2.39393	2.38605	-0.056653	-0.4624	0.384368	0.719092	-0.411764	-0.172177	-0.782392	0.265524	0.137987	-0.051449	-0.228722	0.309742	0.226522	0.264838	0.244851	-0.898553	-0.251176	-0.173195	1.00891	-0.000686	0.106864	-0.847104	-0.022454	-0.482937
13455787	AT3G43500	5.80192	5.89645	6.44134	6.03694	5.79254	6.2341	5.17413	6.18658	5.7658	4.92525	5.56463	5.98671	4.44973	5.06583	4.93033	4.64264	4.47654	4.77705	4.98701	4.55323	4.25112	4.50466	5.42422	4.89491	-1.35219	-0.830619	-1.51101	-1.3943	-1.31599	-1.45705	-0.62779	0.290129	-0.675544	-1.11169	-0.227912	-0.247389	0.537277	-0.512602	-0.679215	-0.13798	0.94768	0.117859	1.16507	-0.802731	-0.003671	0.973708	1.17559	0.365248
13455839	AT3G43829	3.71318	4.01567	4.1791	3.77284	3.7397	3.66567	3.04261	4.43924	3.92383	3.779	3.45527	4.57145	3.44358	3.3042	3.18775	3.50137	3.77764	3.34566	3.94607	3.88472	4.02645	3.54519	3.90406	4.49714	-0.2696	-0.711473	-0.991346	-0.271469	0.037943	-0.320016	-0.670576	0.423564	-0.255261	0.00616	-0.284433	0.905776	0.502483	0.580518	0.838702	0.043816	0.126417	1.15148	1.17306	0.156954	1.09396	0.037656	0.41085	0.245708
13455882	AT3G43980	7.84492	7.54128	7.68704	7.7112	7.62349	7.55459	7.21284	6.88963	7.93228	7.53787	7.38569	7.26377	7.86539	7.58609	7.8151	7.79436	7.84687	8.07858	8.35182	7.97858	7.85541	8.45592	8.08203	8.07747	0.020469	0.044806	0.128056	0.083161	0.223386	0.523989	-0.632073	-0.651648	0.245237	-0.17333	-0.237793	-0.290819	0.486435	0.392488	0.040309	0.661559	0.235163	-0.001114	1.11851	1.04414	-0.204928	0.834889	0.472956	0.289705
13455898	AT3G44060	4.20958	3.26199	3.3836	3.42877	3.14996	3.19096	3.42191	3.58354	2.99461	3.19759	3.07942	3.37751	3.69828	3.50719	3.75831	3.32086	3.58074	3.74282	3.82072	4.12028	3.28219	3.91589	3.2136	3.98707	-0.511304	0.245201	0.374713	-0.107919	0.430771	0.551855	-0.787678	0.321544	-0.38899	-0.231189	-0.070548	0.186547	0.122438	0.613081	-0.476118	0.595034	-0.367138	0.244246	0.910116	0.291537	-0.087128	0.826223	-0.29659	0.057699
13455944	AT3G44171	2.91048	3.01597	2.92659	3.36906	2.91193	2.98591	3.64862	3.3737	3.57616	3.43139	3.30874	3.2301	3.83637	3.43861	3.62058	3.01057	3.10682	2.89526	4.12057	3.16739	3.63517	3.1913	2.99766	3.49719	0.925887	0.42264	0.693992	-0.358497	0.194893	-0.090651	0.738137	0.357736	0.649576	0.062325	0.396819	0.244193	0.284199	-0.271217	0.014595	0.180737	-0.10916	0.60193	-0.453938	-0.628953	-0.634981	0.118412	-0.505979	0.357737
13456023	AT3G44380	7.82457	7.60862	7.8175	7.82784	8.17372	7.83163	6.90512	7.5869	7.41353	8.26033	7.66033	7.80267	7.69613	7.92364	7.78092	8.1542	8.29895	8.3078	7.81147	7.85166	8.11733	8.15894	8.04564	8.12233	-0.128437	0.315016	-0.03658	0.326364	0.125232	0.476168	-0.919445	-0.021727	-0.403962	0.432489	-0.513388	-0.028955	0.115337	-0.071976	0.336414	0.004732	-0.253313	-0.185463	1.03478	-0.050249	0.740376	-0.427757	0.260075	-0.156508
13456115	AT3G44700	4.65331	4.22351	4.01267	3.37899	3.56915	4.23552	3.74843	3.54106	3.2332	3.88116	3.84096	3.62891	3.43713	3.23939	3.26909	3.44639	3.12255	3.15957	3.27991	3.32532	3.6748	3.29265	2.83275	3.24329	-1.21618	-0.984122	-0.743578	0.067401	-0.446595	-1.07594	-0.904876	-0.682455	-0.779465	0.502173	0.271808	-0.606602	-0.157218	0.085937	0.405711	-0.153737	-0.2898	0.08371	0.747658	0.768392	1.18518	-0.65591	-0.561608	0.690312
13456152	AT3G44820	6.33804	6.79786	6.61723	6.89578	6.68254	6.67827	7.04191	6.67203	6.46823	6.83214	7.27515	6.91125	6.7059	6.88715	6.98804	6.73252	6.94347	6.77226	6.43255	6.78128	6.62016	7.01281	6.81531	6.89477	0.367863	0.089293	0.370814	-0.163261	0.260936	0.093988	0.703873	-0.125829	-0.148999	-0.063648	0.592609	0.23298	-0.273352	-0.105871	-0.367882	0.280285	-0.128164	0.122514	-0.977225	0.019958	-0.218883	0.343933	-0.720773	-0.110466
13456196	AT3G45030	2.28314	2.30307	2.38842	2.69934	2.18136	2.48921	2.89981	2.18257	2.61025	2.30735	2.35317	2.19729	2.14897	2.56358	2.32093	2.33993	2.05069	2.34024	2.33993	2.3325	2.25062	2.3263	2.10947	2.31356	-0.134171	0.260508	-0.067488	-0.359414	-0.130671	-0.148976	0.616671	-0.120497	0.221837	-0.391987	0.171809	-0.291928	0.190961	-0.231077	-0.070305	-0.013627	0.058773	-0.02668	-0.42571	-0.11058	-0.292142	0.37836	-0.113036	0.265248
13456456	AT3G45673	3.88855	3.87895	4.74926	3.92448	3.9214	3.79861	3.26143	3.95159	3.63307	3.69234	3.52378	3.60658	4.01174	3.71477	3.72886	4.17705	3.83501	4.16278	4.32777	3.98298	4.78486	3.364	4.25378	3.67352	0.123188	-0.164178	-1.02039	0.252569	-0.086397	0.364169	-0.627127	0.072644	-1.11619	-0.232142	-0.39762	-0.192038	0.31603	0.268214	1.056	-0.813049	0.418772	-0.489266	0.943157	0.19557	2.17219	-0.580907	0.816392	-0.297228
13456627	AT3G46086	4.26301	4.39914	5.1875	4.59194	4.99217	5.20023	4.866	4.70064	4.28571	4.68033	4.4934	5.47725	4.50772	4.94864	4.96657	4.31278	4.34789	4.90526	4.60135	4.46969	4.25883	4.38706	4.4809	4.7208	0.244712	0.54951	-0.220926	-0.279165	-0.64428	-0.294979	0.602994	0.301502	-0.901788	0.088386	-0.498775	0.277018	0.093633	-0.478958	-0.707746	0.074281	0.133013	-0.184451	-0.509361	-0.78046	0.194042	-0.014105	0.631788	-0.461469
13456643	AT3G46120	2.32823	2.40006	2.0364	2.16643	2.76205	2.24129	3.06655	2.13916	2.72604	2.06549	2.22023	2.53306	2.4161	2.61831	2.21623	2.62225	2.27104	2.33087	2.8829	2.87012	2.47853	2.58006	2.30717	2.55652	0.087871	0.218249	0.179828	0.455828	-0.491001	0.089587	0.738323	-0.260909	0.689635	-0.100933	-0.541821	0.29177	0.466797	0.251806	0.262295	-0.042189	0.036124	0.225649	-0.271526	0.512715	-0.42734	0.058744	0.577945	-0.066121
13456737	AT3G46380	6.80283	6.80733	7.09124	6.20683	7.08364	7.84696	6.10814	7.75836	6.371	6.05683	7.00146	7.5809	4.86268	4.6748	4.41767	4.6323	4.39269	4.12162	4.51569	4.11913	4.52757	4.26483	4.43264	4.39327	-1.94015	-2.13253	-2.67357	-1.57453	-2.69095	-3.72534	-0.694697	0.951035	-0.720242	-0.149997	-0.082183	-0.266061	-0.346991	-0.555665	0.109903	-0.367471	0.039954	0.271648	0.347706	-1.5067	0.830145	-0.217474	0.122137	0.537709
13456831	AT3G46660	5.69593	5.27217	5.71958	5.43667	5.62668	5.19463	5.76707	5.23944	5.47916	5.37373	6.13812	6.74174	5.68757	5.93904	5.79039	6.05284	5.80288	6.1822	5.79896	5.769	5.79039	6.25376	6.21651	6.61745	-0.008366	0.666875	0.070807	0.616169	0.1762	0.98757	0.071138	-0.032729	-0.240424	-0.06294	0.511441	1.54712	0.111394	-0.170037	0	0.200925	0.413624	0.435249	0.040256	-0.137308	0.240424	0.263865	-0.097817	-1.11187
13457464	AT3G48344	4.72004	4.7491	4.54243	4.02013	4.4099	4.31873	3.99837	4.7603	3.91591	3.98453	4.29164	4.99185	3.8939	3.86704	3.60794	3.50192	4.06747	3.95607	3.98405	3.70659	3.49229	3.74463	3.66173	3.846	-0.826142	-0.882058	-0.934493	-0.5182	-0.342427	-0.362664	-0.721675	0.011194	-0.626521	-0.035599	-0.118256	0.673115	0.090146	-0.16045	-0.115655	0.242707	-0.405747	-0.110067	0.811821	-0.171644	0.510866	0.278306	-0.287491	-0.783182
13457758	AT3G49305	3.68567	4.12566	4.78433	4.23061	3.85103	4.80888	4.54428	4.20419	4.28505	3.9538	3.74244	3.70045	4.0636	4.19046	3.7835	4.01013	3.60764	4.33171	4.04977	4.00391	4.12089	3.96068	3.95868	4.34535	0.377935	0.064799	-1.00083	-0.220481	-0.243395	-0.47717	0.858617	0.078536	-0.499281	-0.276807	-0.108596	-1.10843	-0.013832	-0.186544	0.33738	-0.049447	0.351041	0.013643	-0.872449	-0.26508	0.836661	0.22736	0.459637	1.12207
13457788	AT3G49340	5.88353	4.72544	5.4854	4.77195	5.2995	5.9591	5.20397	5.1632	5.80096	5.54173	5.22193	6.7751	4.13468	4.17003	4.01899	4.80952	5.07199	6.7417	4.00677	4.10685	4.07509	5.19732	5.54058	5.97108	-1.74885	-0.555408	-1.46641	0.037571	-0.227512	0.782603	-0.679562	0.437763	0.315559	0.769777	-0.077573	0.816002	-0.127909	-0.063174	0.056099	0.387799	0.468584	-0.770621	0.551653	-0.500937	-0.25946	-0.381978	0.546157	-1.58662
13457860	AT3G49480	4.53577	4.56729	3.82425	4.7753	4.46085	4.74898	3.72027	4.01388	4.31859	5.36469	4.54674	4.74259	5.09258	4.65959	4.96913	6.04725	5.1526	5.23007	5.24822	4.94868	4.93037	5.22367	4.63743	5.33581	0.556813	0.092297	1.14488	1.27195	0.691751	0.481089	-0.815491	-0.553418	0.494335	0.589384	0.085892	-0.006388	0.155642	0.289091	-0.03876	-0.823581	-0.515169	0.105747	0.971133	0.842509	-0.533095	-1.41297	-0.601061	0.112135
13457993	AT3G49744	5.56845	4.09257	3.97003	4.67517	4.8465	4.87851	4.24854	4.24643	4.78607	4.53864	4.66996	5.0829	4.33991	3.85626	4.28078	4.49195	5.60351	4.97261	3.97437	4.28943	5.18795	4.76548	4.89731	4.85707	-1.22854	-0.23631	0.310758	-0.183223	0.757008	0.094101	-1.31991	0.153858	0.816042	-0.136539	-0.176543	0.204392	-0.365541	0.433171	0.907162	0.273533	-0.706194	-0.115544	0.954364	0.279313	0.09112	0.410072	-0.529651	-0.319936
13457995	AT3G49750	4.13277	4.59042	4.71555	4.40058	4.89585	4.36035	4.85137	4.70922	4.50538	4.32249	4.79814	4.07834	4.71913	4.57001	4.60365	5.67475	5.66476	5.17763	4.50881	4.64815	4.97342	5.01771	5.35169	4.88641	0.586368	-0.020408	-0.111894	1.27417	0.768913	0.817273	0.718605	0.118795	-0.210164	-0.078085	-0.097705	-0.282013	-0.210325	0.078132	0.369769	-0.657036	-0.313073	-0.291221	-0.92893	-0.040663	0.579933	-0.578951	-0.215368	-0.009208
13458054	AT3G49960	5.09871	4.49184	4.57038	4.52278	5.01892	4.77513	4.44159	5.0455	4.67153	4.37771	4.36707	4.38462	5.26149	4.50798	4.67799	5.53136	4.74877	4.81476	4.75526	4.79892	4.79826	5.08391	4.92102	4.50782	0.162774	0.01614	0.107607	1.00858	-0.270145	0.039627	-0.657125	0.553658	0.101148	-0.145073	-0.651843	-0.390509	-0.506227	0.290939	0.120276	-0.447448	0.172246	-0.306942	0.150898	-0.262719	0.019128	-0.302375	0.824089	0.083567
13458175	AT3G50200	4.09575	2.49349	3.10035	2.73439	3.27243	2.8058	3.21887	3.35627	2.84523	2.88817	3.24977	3.69336	3.03391	3.67195	3.16618	2.95735	3.0823	2.90373	3.05641	3.40187	3.18366	2.72948	2.62061	3.40656	-1.06184	1.17846	0.065823	0.222957	-0.190123	0.097927	-0.87688	0.862781	-0.255123	0.153775	-0.022659	0.88756	0.022498	-0.270083	0.01748	-0.22787	-0.461692	0.502834	0.899378	-1.13286	0.272603	-0.381645	-0.439033	-0.384726
13458471	AT3G50840	6.41462	6.71266	6.14136	6.17295	7.1838	7.2768	6.5694	6.47802	5.7734	5.71993	6.71314	6.90853	6.08368	6.47295	6.07876	6.2142	6.8068	6.35273	5.92608	6.38163	5.35942	5.86565	5.83647	5.68452	-0.330936	-0.239713	-0.062604	0.041252	-0.376998	-0.924064	0.154781	-0.234647	-0.367957	-0.453018	-0.47066	-0.368266	-0.1576	-0.091321	-0.719335	-0.348558	-0.97033	-0.668216	-0.312381	0.143326	-0.351378	0.10446	-0.49967	-0.29995
13458593	AT3G51230	5.51232	5.79783	6.02911	5.77132	5.21693	5.89678	6.23022	5.47614	4.75583	5.83785	5.78689	5.70847	4.68683	4.85944	4.56773	4.70739	4.51129	4.98848	4.63783	4.95434	4.63141	5.60957	4.66713	5.20943	-0.825492	-0.938396	-1.46138	-1.06393	-0.705637	-0.908295	0.717899	-0.321688	-1.27327	0.06653	0.569963	-0.188307	-0.049002	0.094901	0.063686	0.902179	0.155839	0.220945	-0.766901	0.416589	1.33696	0.835649	-0.414124	0.409252
13458694	AT3G51490	4.60425	4.86085	5.00567	4.85469	5.21174	5.41012	5.41289	5.48107	4.50461	5.09968	5.13961	5.11115	4.9995	4.72679	4.75372	4.75615	5.27658	5.03082	4.77345	5.01611	4.89676	5.0101	5.17054	5.15468	0.395252	-0.134062	-0.251947	-0.098532	0.064836	-0.379307	0.808636	0.620211	-0.501062	0.244989	-0.072134	-0.298977	-0.226047	0.289316	0.143035	0.253945	-0.106041	0.12386	-1.03468	-0.330895	0.644097	0.008956	-0.033907	0.422837
13458729	AT3G51590	4.15208	3.36393	3.37929	3.38834	3.62244	3.36374	3.5654	3.48088	3.63431	3.44209	3.25901	3.17767	4.11289	4.02986	3.5094	3.81073	3.73411	3.68734	3.85126	3.94429	3.65551	3.60182	3.73398	4.34119	-0.039186	0.66593	0.130107	0.422388	0.111673	0.3236	-0.586683	0.116949	0.255026	0.053756	-0.36343	-0.186067	-0.261631	-0.085572	0.146112	-0.208903	-0.00013	0.653854	0.325052	-0.202521	-0.108914	-0.262659	0.3633	0.839921
13458956	AT3G52110	7.10207	6.54483	6.57168	6.86067	6.56163	6.91562	6.39371	6.64572	6.24413	6.46455	6.69174	6.20269	7.04379	6.99226	6.92443	7.53697	7.31092	6.96667	6.98879	6.86683	6.78507	7.49591	7.16614	7.19742	-0.058276	0.447426	0.352748	0.676308	0.749288	0.05105	-0.70836	0.100889	-0.327543	-0.396115	0.130104	-0.712938	-0.055	-0.125425	-0.139352	-0.041061	-0.144777	0.230748	0.65336	-0.226314	0.188191	0.355054	-0.274881	0.943686
13459045	AT3G52270	4.7354	4.63371	4.51415	4.60732	4.37116	4.58414	4.07363	4.51969	4.03619	4.5518	4.02767	4.21188	4.45305	4.34057	4.89042	4.41144	4.51286	4.53929	4.69096	4.44025	4.17267	4.33879	4.61207	4.27807	-0.282352	-0.293139	0.376268	-0.195884	0.141701	-0.044853	-0.661763	-0.114019	-0.477956	-0.055526	-0.343493	-0.372256	0.237915	0.099679	-0.71775	-0.072647	0.099213	-0.261217	0.899678	0.213698	-0.239794	-0.017121	0.442706	0.111039
13459069	AT3G52320	3.88191	4.07673	3.85825	3.54022	3.70037	3.87974	4.85322	4.8013	3.87974	3.67801	3.87725	3.90755	4.20808	3.77745	4.20107	4.66118	3.74156	3.8205	4.37353	3.77745	4.30389	3.81219	3.88521	3.87974	0.326161	-0.299276	0.342821	1.12095	0.04119	-0.059236	0.971307	0.724569	0.021484	0.137792	0.176882	0.027818	0.165457	0	0.102816	-0.848982	0.143649	0.059236	-0.80585	-0.724569	0.081332	-0.986774	-0.033233	0.031418
13459071	AT3G52330	3.08082	2.85464	2.68101	3.03375	2.8146	2.73691	3.69692	2.84219	2.6376	2.63172	2.89123	2.60954	3.02935	3.4391	2.56667	2.76063	2.75498	2.74306	3.07725	2.85575	2.92893	2.87184	2.82121	2.59442	-0.051473	0.584457	-0.114347	-0.273119	-0.059627	0.006151	0.616091	-0.012452	-0.043411	-0.402027	0.076624	-0.127372	0.047896	-0.583344	0.362263	0.111214	0.06623	-0.148643	-0.568195	-0.570892	0.405674	0.513241	-0.010394	-0.021271
13459116	AT3G52510	5.52389	4.81252	4.2695	4.57684	3.77939	4.52163	4.88389	5.10427	4.2347	4.57476	4.9547	4.72674	5.48413	5.76827	5.21865	4.81642	4.67883	4.51407	5.46633	5.63403	5.80282	4.7618	5.27009	4.71282	-0.03976	0.955751	0.949151	0.239583	0.899438	-0.007555	-0.640005	0.291755	-0.034801	-0.002081	1.17531	0.205111	-0.017803	-0.134245	0.584171	-0.05462	0.591268	0.198748	0.622202	-0.426	0.618972	-0.052539	-0.584045	-0.006363
13459125	AT3G52550	6.9108	5.85861	5.84933	5.63905	5.66848	5.15401	5.27902	6.20171	5.70379	5.73862	6.26857	5.69413	5.18551	4.81781	5.01728	5.55582	5.27719	4.86882	5.13298	4.70435	5.49728	5.07186	4.9822	4.89029	-1.72529	-1.0408	-0.832049	-0.083231	-0.391285	-0.285188	-1.63179	0.343097	-0.14554	0.099573	0.600088	0.540123	-0.052536	-0.113458	0.480004	-0.483961	-0.294997	0.021475	1.57925	-0.456555	0.625544	-0.583534	-0.895085	-0.518648
13459362	AT3G53160	5.65275	5.30723	5.56497	5.57573	5.16578	5.4781	4.80237	5.11636	5.03649	5.28689	5.21438	5.65327	5.75187	5.24838	5.91161	5.5697	5.49988	5.35119	5.65609	5.18531	6.30259	5.78929	5.78475	5.85479	0.099121	-0.058851	0.346639	-0.006021	0.334101	-0.126907	-0.850374	-0.19087	-0.52848	-0.28884	0.048601	0.175167	-0.095782	-0.063068	0.390974	0.219584	0.28487	0.503595	0.754592	0.127802	0.919454	0.508424	0.236269	0.328428
13459455	AT3G53420	9.25465	9.37971	9.24857	8.75909	9.94586	9.01205	8.51434	8.86239	9.152	8.64883	9.82365	9.376	8.08579	7.99828	8.16973	7.77546	8.1305	7.98575	8.1331	7.8282	7.91319	7.56128	8.29394	7.95411	-1.16886	-1.38143	-1.07884	-0.983628	-1.81536	-1.0263	-0.74031	-0.517322	-0.096569	-0.110262	-0.122215	0.363958	0.047311	-0.170079	-0.256539	-0.214185	0.163434	-0.031645	0.787621	0.347243	-0.15997	-0.103923	0.285649	-0.395603
13459575	AT3G53690	5.86778	5.7759	6.37959	5.83259	5.70512	5.74458	6.47709	7.00556	6.09006	5.82046	5.78869	5.67012	5.97997	6.03686	5.93132	6.07283	5.37793	5.5792	5.58393	6.65809	6.10495	5.82976	5.28981	5.6162	0.112183	0.260955	-0.448268	0.240242	-0.327193	-0.165378	0.609303	1.22965	-0.28953	-0.012126	0.083568	-0.074455	-0.39604	0.621234	0.173629	-0.243072	-0.088121	0.036996	-1.00534	-0.608416	0.463159	-0.230946	-0.171689	0.111451
13459892	AT3G54390	4.93538	5.42264	5.68874	6.02889	6.0663	6.61728	4.3104	4.91242	5.50028	5.81061	6.20082	6.25357	4.63142	5.16653	5.01914	5.0228	6.04623	5.95606	4.56445	4.49562	5.51294	5.34858	5.82231	5.75774	-0.303955	-0.256116	-0.669601	-1.00609	-0.020069	-0.661228	-0.624976	-0.510218	-0.188468	-0.218275	0.134523	-0.363711	-0.066969	-0.670904	0.493796	0.325776	-0.223917	-0.198313	0.558007	-0.160686	0.682264	0.544051	-0.35844	0.165398
13460415	AT3G55490	6.65011	5.85051	6.41488	6.22866	6.34626	6.41519	6.04791	6.48046	6.2912	6.35196	6.3391	6.60877	6.49496	6.38585	6.20508	6.64709	6.63511	7.05814	7.1195	6.72418	6.84629	7.06304	6.78559	7.02192	-0.155156	0.535339	-0.209802	0.418434	0.288844	0.642945	-0.6022	0.629951	-0.123682	0.123301	-0.007163	0.193578	0.624547	0.338323	0.641206	0.41595	0.150483	-0.036218	1.22675	-0.291628	0.764888	0.292649	0.157646	-0.229796
13460489	AT3G55680	3.09632	3.709	3.88041	3.39172	3.33381	3.02837	3.7426	3.10523	3.04206	3.42972	3.20095	3.07618	3.23655	3.12016	3.14113	3.29389	2.99866	2.99414	3.10352	2.99037	3.06048	3.14171	2.95492	2.89154	0.140235	-0.588838	-0.739277	-0.09783	-0.335149	-0.034234	0.646279	-0.603767	-0.838345	0.037996	-0.132861	0.04781	-0.133028	-0.129792	-0.080653	-0.152185	-0.043738	-0.102597	-0.779307	0.473975	0.757692	-0.190181	0.089123	-0.150407
13460530	AT3G55900	6.71331	6.83097	6.97651	5.6853	6.39385	7.15374	6.04744	7.09448	7.2231	5.60832	6.80802	8.317	5.0884	6.20483	5.56988	5.39311	6.13704	5.57417	5.6627	6.08759	5.73236	4.97723	6.14042	6.83927	-1.62491	-0.626141	-1.40663	-0.292191	-0.256813	-1.57956	-0.665875	0.263508	0.246588	-0.076972	0.414172	1.16326	0.574299	-0.117241	0.162482	-0.415874	0.003378	1.26509	1.24017	-0.380749	-0.084106	-0.338902	-0.410794	0.10183
13460542	AT3G55930	3.94237	4.54329	4.06571	4.13373	4.61094	4.63288	4.54053	5.43274	4.22406	4.24414	4.28742	5.09394	4.55683	4.23706	4.22406	4.87582	4.26204	4.28252	4.20094	4.30582	4.33697	4.57404	4.93301	4.50329	0.614468	-0.306225	0.158347	0.742084	-0.3489	-0.350361	0.598164	0.889448	0.158347	0.11041	-0.323521	0.461063	-0.355896	0.068754	0.112916	-0.301772	0.670963	0.220779	-0.95406	-0.820694	-0.045431	-0.412182	0.994484	-0.240284
13460899	AT3G56790	6.7842	8.20367	6.73519	7.24476	7.72942	7.36101	7.78658	7.58107	7.02667	7.25884	7.45849	7.83107	6.6411	5.80504	6.44631	6.30916	4.98148	6.42041	7.00887	6.86592	6.37232	5.90754	5.14572	6.7842	-0.143092	-2.39863	-0.288879	-0.935607	-2.74794	-0.940596	1.00238	-0.622597	0.291488	0.014075	-0.270935	0.470064	0.367767	1.06088	-0.07399	-0.401617	0.164233	0.363786	-0.634612	1.68348	-0.365478	-0.415692	0.435168	-0.106278
13461048	AT3G57072	7.26572	8.39606	7.76133	7.79684	7.75724	7.63399	8.08305	8.1389	7.09684	7.05421	7.41518	7.62948	7.33475	7.19511	6.84744	7.06046	5.98319	6.87571	7.48795	7.70914	6.36176	6.26781	6.54476	6.37964	0.069033	-1.20095	-0.913882	-0.736373	-1.77405	-0.758282	0.817332	-0.257163	-0.664486	-0.742629	-0.342056	-0.004509	0.153199	0.514026	-0.485688	-0.792657	0.561574	-0.496076	-0.664133	0.771189	0.178798	-0.050028	0.90363	-0.491567
13461065	AT3G57160	5.16192	5.12722	5.29389	5.00803	4.80261	4.54054	4.38346	5.17634	5.27704	5.01941	3.95437	3.90081	4.99682	5.22367	5.25623	5.3708	4.75059	4.9532	5.07796	5.23646	5.22367	5.19604	4.64552	5.00192	-0.165099	0.096446	-0.037654	0.362764	-0.052015	0.412662	-0.778463	0.049113	-0.016847	0.011372	-0.848233	-0.639728	0.081137	0.012795	-0.032563	-0.174758	-0.105072	0.048718	0.8596	-0.036318	-0.015716	-0.18613	0.743161	0.688446
13461191	AT3G57460	7.39123	5.61745	4.77289	5.27597	5.68068	6.22926	7.98059	6.09879	6.14907	7.24523	9.03514	9.70827	4.94392	4.40747	4.30643	4.96641	5.0391	5.1044	5.55525	4.81426	4.54772	6.24409	6.52676	6.31919	-2.44731	-1.20998	-0.466461	-0.309565	-0.641572	-1.12485	0.58936	0.481344	1.37618	1.96926	3.35447	3.47901	0.611331	0.406789	0.241287	1.27769	1.48766	1.21479	0.021971	-0.074555	-1.13489	-0.691571	-1.86681	-2.26423
13461231	AT3G57490	7.22651	6.85435	7.02944	7.06418	6.61779	6.74466	6.59501	6.77085	7.10802	6.80021	6.87096	6.82759	7.81867	7.8433	7.45569	7.69279	7.16513	7.86334	7.59438	7.7438	7.75871	7.66642	7.71152	7.91068	0.592162	0.988952	0.426242	0.628608	0.547336	1.11868	-0.631502	-0.083499	0.078573	-0.263975	0.253172	0.082927	-0.224295	-0.099501	0.303027	-0.02637	0.546386	0.047333	0.407207	-0.016002	0.224454	0.237605	0.293214	-0.035594
13461373	AT3G57900	2.46104	3.17469	3.33611	3.29473	3.51727	2.76747	3.24907	3.32291	2.82762	2.89281	3.02524	2.86321	3.35429	3.57986	3.04092	3.45373	3.04092	3.06247	3.41044	3.15902	3.40738	3.36401	2.987	3.03954	0.893247	0.405175	-0.295188	0.158995	-0.476349	0.295003	0.788032	0.148225	-0.50849	-0.401929	-0.492028	0.095738	0.056152	-0.420843	0.36646	-0.08972	-0.05392	-0.022929	-0.73188	-0.569068	0.87495	0.312209	0.438108	-0.118667
13461506	AT3G58250	3.56677	4.03207	4.72419	4.33989	3.73411	4.16	4.24146	4.87477	4.21367	4.14196	4.43086	4.97372	3.87382	4.23798	3.61117	4.06715	3.71439	4.07142	4.35421	3.67882	3.83049	3.92205	4.0541	4.15475	0.307044	0.205913	-1.11302	-0.272738	-0.019717	-0.088574	0.674682	0.842705	-0.510517	-0.197927	0.696752	0.813724	0.480396	-0.559161	0.219327	-0.145097	0.33971	0.083332	-0.194286	-1.40187	0.729844	0.05283	-0.357042	-0.730392
13461517	AT3G58270	7.82018	7.20939	7.14302	7.12056	7.09885	7.49468	7.18204	7.38909	7.26042	6.59522	7.66708	7.86573	7.78379	7.93044	7.94526	7.52923	7.87561	7.97189	7.63605	8.01377	7.77834	7.88682	7.85044	7.83748	-0.036387	0.721053	0.802247	0.408667	0.77676	0.47721	-0.638137	0.179697	0.117406	-0.525337	0.56823	0.371049	-0.147742	0.083328	-0.166925	0.357592	-0.02517	-0.134409	0.490395	-0.096369	-0.284331	0.882929	-0.5934	-0.505458
13461550	AT3G58340	4.95294	4.76736	4.39556	4.82372	5.16444	5.33812	4.03844	5.38738	4.34879	5.35674	4.37524	5.88293	4.0417	4.65053	4.21895	4.32064	4.37524	3.94843	4.58034	3.74695	3.46735	4.15416	4.35701	4.1177	-0.91124	-0.116831	-0.176608	-0.503082	-0.789209	-1.3897	-0.914496	0.620017	-0.046775	0.533021	-0.789209	0.544805	0.538639	-0.903581	-0.751601	-0.166481	-0.01823	0.169276	1.45314	-1.5236	-0.704826	-0.699502	0.770979	-0.375529
13461555	AT3G58350	4.19263	3.58568	3.36316	3.69309	3.92573	3.73469	3.38225	4.08683	3.09866	3.47179	3.98758	3.70669	3.09845	3.32012	2.67937	2.6718	3.16455	2.83197	2.95737	2.7725	3.08251	2.74655	2.87781	3.02646	-1.09418	-0.265565	-0.683791	-1.02128	-0.761179	-0.902719	-0.810385	0.501153	-0.264504	-0.221303	0.061849	-0.028003	-0.14108	-0.547621	0.403136	0.074748	-0.286738	0.194488	0.669305	-1.04877	0.66764	0.296051	-0.348587	0.222491
13461735	AT3G58676	2.45532	2.80027	2.66562	2.89469	2.74568	2.92129	3.12281	2.73943	2.61679	2.68883	2.79957	2.76589	2.88678	2.66195	3.42246	3.44346	3.21304	3.08135	2.66867	3.071	2.66169	2.88484	2.91511	3.19349	0.431461	-0.138318	0.756842	0.548766	0.467362	0.160053	0.667491	-0.060833	-0.048832	-0.205858	0.053888	-0.155401	-0.218106	0.409048	-0.760769	-0.558613	-0.29793	0.112142	-0.885597	0.469881	-0.711937	-0.352755	-0.351818	0.267543
13461802	AT3G58877	3.91607	3.22848	3.33126	3.07758	3.27254	3.37134	3.23169	3.75461	3.69362	4.1887	3.45113	3.38822	3.45581	3.32639	3.08871	3.60057	3.68318	3.38822	3.44625	3.21042	3.24669	3.29888	3.31407	3.38822	-0.460254	0.097906	-0.242541	0.522991	0.410634	0.016877	-0.684375	0.526127	0.362365	1.11112	0.17859	0.016877	-0.009562	-0.115961	0.157973	-0.301685	-0.369101	0	0.674813	-0.642088	-0.204392	-1.41281	-0.547691	-0.016877
13461830	AT3G58960	3.60527	4.00795	3.62483	3.75728	3.31812	3.42748	3.02821	4.35362	3.36988	3.82831	3.25528	3.48203	3.22919	3.76404	3.18307	3.7819	3.29927	3.07448	2.94313	3.42748	3.25177	3.25177	3.64786	3.70808	-0.376085	-0.243912	-0.441762	0.02462	-0.018848	-0.353006	-0.577062	0.345667	-0.254945	0.07103	-0.062838	0.05455	-0.286055	-0.336556	0.068702	-0.530129	0.348593	0.6336	0.291007	-0.682223	0.323647	-0.601159	0.411431	0.57905
13461914	AT3G59130	5.16389	5.56038	5.82546	5.37391	5.08592	5.85872	4.42086	5.93054	4.68015	5.31774	5.08796	6.05838	5.35158	5.5196	4.92065	5.07611	4.78611	5.36576	5.07843	4.8821	4.26384	5.39079	5.50735	4.87002	0.187695	-0.040775	-0.904815	-0.297795	-0.299807	-0.492958	-0.743033	0.370162	-1.14532	-0.056166	0.002042	0.199659	-0.273149	-0.637503	-0.656814	0.314677	0.721245	-0.495745	0.469884	-1.00767	0.488505	0.370843	0.719203	-0.695404
13462198	AT3G59830	4.97555	4.63482	4.39437	4.38187	4.33322	4.37347	4.08186	4.81384	4.4826	4.15055	3.81051	4.21443	6.21185	5.96975	5.41445	5.44423	5.42045	5.98938	5.80558	5.5015	6.01407	5.2283	5.48101	5.07207	1.23631	1.33493	1.02008	1.06236	1.08723	1.61591	-0.893685	0.179019	0.088227	-0.23132	-0.52271	-0.159046	-0.406276	-0.468247	0.599613	-0.21593	0.060559	-0.917308	0.487409	-0.647266	0.511386	0.01539	0.583269	-0.758262
13462477	AT3G60460	3.96137	4.02357	4.03025	3.94484	3.77913	4.67132	4.63229	4.34315	3.93569	3.59433	3.66767	4.57034	4.40234	4.33503	3.64365	4.15821	4.18054	4.15459	4.04977	3.92895	3.72798	3.98088	4.15209	4.13523	0.440966	0.311465	-0.386598	0.213367	0.401414	-0.516734	0.670922	0.319587	-0.094553	-0.350513	-0.111457	-0.100987	-0.35257	-0.406085	0.084336	-0.177329	-0.028451	-0.019361	-1.02349	-0.725672	0.178889	0.173184	0.083006	0.081626
13462588	AT3G60890	7.29517	5.81142	6.4256	6.06019	5.75702	5.17974	6.22624	5.96668	6.44394	5.67278	5.82405	5.45987	6.58933	5.90402	6.2602	5.71775	6.60544	6.77647	6.06191	6.26803	6.7233	6.54832	6.48182	6.07337	-0.705843	0.092605	-0.165402	-0.342438	0.84842	1.59673	-1.06893	0.155256	0.018339	-0.387414	0.067024	0.28013	-0.527421	0.364006	0.463107	0.830565	-0.123619	-0.703103	0.541513	0.20875	0.444768	1.21798	-0.190643	-0.983233
13462713	AT3G61113	5.87084	5.60638	6.10929	6.53696	6.61473	5.66541	4.71281	6.19304	5.16969	6.12534	6.68446	5.99303	5.67831	6.03454	6.14159	5.61145	6.04158	5.60906	5.72951	6.35798	5.98657	6.027	6.00923	6.2422	-0.192528	0.428154	0.032301	-0.925514	-0.573156	-0.056352	-1.15803	0.586661	-0.939604	-0.411619	0.069724	0.327617	0.051201	0.323446	-0.155025	0.415554	-0.032349	0.633138	1.20923	-0.263215	0.784579	0.827173	-0.102073	0.305521
13462796	AT3G61360	7.09238	7.27055	7.30073	7.18739	7.34854	7.02209	6.34271	7.33892	7.20175	6.86149	7.3056	7.24131	7.05802	7.25548	6.82213	6.98236	7.27483	7.29971	6.69342	7.11359	6.98403	6.79103	7.35699	6.97246	-0.034358	-0.015065	-0.478599	-0.205029	-0.073706	0.27762	-0.74967	0.068371	-0.098979	-0.3259	-0.042943	0.219221	-0.364603	-0.141891	0.1619	-0.191326	0.082158	-0.327249	0.385067	-0.210262	0.260879	0.134574	0.125101	-0.54647
13462927	AT3G61720	5.92642	6.72195	6.32478	6.56549	6.25793	6.81433	5.13466	6.84232	5.36385	6.07458	5.75674	6.29803	5.9753	6.41131	5.71167	6.39902	5.31846	5.71087	5.46261	6.2542	5.12604	5.44912	6.75776	5.82831	0.048878	-0.310638	-0.613111	-0.166474	-0.939468	-1.10345	-0.791759	0.120373	-0.960929	-0.490914	-0.501191	-0.516298	-0.512686	-0.157113	-0.585632	-0.949896	1.43929	0.117439	0.279073	-0.277486	0.375297	-0.458982	1.94048	0.633737
13462986	AT3G61763	4.62985	4.61207	4.23185	3.70329	4.29993	4.86075	3.37177	3.78143	3.9881	3.87526	5.06709	3.93528	4.19559	3.76928	4.22625	3.95987	3.49161	4.64365	4.11077	4.13745	4.45762	4.08869	4.32071	4.71988	-0.434268	-0.842796	-0.005597	0.256581	-0.80832	-0.217097	-1.25808	-0.830643	-0.243743	0.171977	0.767164	-0.925465	-0.084814	0.368172	0.231374	0.128828	0.829101	0.076223	1.17327	1.19881	0.475117	-0.043149	0.061937	1.00169
13463057	AT3G61962	3.16401	3.67209	4.60416	3.49366	3.2067	4.89935	3.90842	4.46271	4.17179	3.666	2.94851	5.28487	3.23264	3.65571	3.82033	4.35751	3.10682	4.55247	3.51162	3.34488	3.5633	3.6633	3.79654	3.50373	0.068627	-0.016377	-0.783829	0.863854	-0.099885	-0.346878	0.744411	0.790617	-0.432362	0.172338	-0.258197	0.385522	0.278984	-0.310831	-0.257022	-0.694208	0.689721	-1.04874	-0.465427	-1.10145	0.17534	-0.866546	0.947918	-1.43426
13463093	AT3G62040	6.94469	6.15796	5.58087	6.5837	7.41984	6.94804	5.96589	5.94538	5.93405	6.96661	6.96346	6.18495	6.91883	6.52811	5.857	6.66298	7.91385	7.45828	6.84264	6.45015	5.453	7.0789	7.44403	6.99228	-0.025853	0.370143	0.276129	0.079275	0.494013	0.510231	-0.978792	-0.212589	0.353178	0.382909	-0.456377	-0.763099	-0.076191	-0.077956	-0.404007	0.415921	-0.469822	-0.465996	0.902601	0.134633	-0.757185	0.033012	-0.013445	0.297103
13463117	AT3G62097	3.29352	3.52972	3.68984	2.57222	3.34957	3.12353	4.13357	2.84041	2.70812	2.54214	3.13572	3.35038	3.15631	3.03695	3.23057	3.32183	2.90058	3.64831	2.74545	3.10948	3.09597	3.36131	2.86973	3.10948	-0.137214	-0.492763	-0.459268	0.749612	-0.448989	0.524783	0.840051	-0.689311	-0.981713	-0.030078	-0.213849	0.226851	-0.410858	0.07253	-0.134598	0.039473	-0.030858	-0.538828	-1.25091	0.761841	0.847115	0.069551	0.182991	-0.765679
13463309	AT3G62430	5.49713	5.44939	5.85049	5.12919	5.32355	5.02285	4.29019	5.18247	5.15641	4.05971	4.44847	5.32355	6.02853	6.04439	6.15496	5.10155	6.17158	5.88045	5.78441	5.30935	5.54605	4.44433	5.07601	4.74649	0.531399	0.594994	0.304467	-0.027635	0.848034	0.8576	-1.20693	-0.266925	-0.694083	-1.06947	-0.875073	0.300696	-0.244118	-0.735036	-0.608908	-0.657222	-1.09557	-1.13396	0.962815	-0.468111	0.085175	0.412252	-0.220495	-1.43466
13463410	AT3G62780	5.17075	3.73143	3.61253	4.09919	3.28746	4.04528	4.59244	3.81494	4.39538	3.9538	4.71894	5.07972	4.82406	4.45489	5.33869	4.47693	4.99254	4.32285	4.47693	5.36366	5.48581	5.15389	5.21194	5.43477	-0.346686	0.723459	1.72616	0.377738	1.70508	0.277568	-0.578311	0.083514	0.782852	-0.145391	1.43148	1.03444	-0.347128	0.908769	0.147117	0.67696	0.219404	1.11193	0.231183	0.825255	-0.635735	0.822351	-1.21208	0.07749
13463517	AT3G63040	3.08583	2.67272	2.58131	2.99349	2.56128	2.87946	2.48011	2.68711	2.84664	2.73146	2.76444	3.06357	3.03051	2.87762	3.15707	3.06357	2.82435	2.84939	2.89736	2.84939	3.13933	2.84939	2.95765	2.84939	-0.055316	0.204898	0.575758	0.070078	0.263069	-0.030074	-0.605718	0.014392	0.26533	-0.262034	0.20316	0.184112	-0.133153	-0.02823	-0.017737	-0.214186	0.1333	0	0.472565	-0.042622	-0.283067	0.047848	-0.06986	-0.184112
13463858	AT4G00160	3.55181	3.0758	3.08828	2.98089	3.65626	3.11595	2.76627	3.28135	2.4951	2.67384	2.93651	3.64368	2.8407	3.30146	3.05244	3.17229	2.96624	2.958	3.37381	2.60649	2.84991	3.15321	3.32259	2.55187	-0.711103	0.225659	-0.035837	0.191401	-0.690027	-0.157957	-0.785533	0.205548	-0.593178	-0.307054	-0.719753	0.527729	0.533102	-0.694966	-0.202532	-0.019077	0.356358	-0.406122	1.31864	-0.900514	0.390646	0.287977	1.07611	-0.933851
13463890	AT4G00260	3.44624	3.86473	4.03744	4.08508	3.9915	3.76482	4.06461	4.12338	3.94107	3.77755	4.1183	4.33018	4.22269	4.35374	3.9915	3.48026	3.9915	3.80218	3.95378	4.30978	3.99484	4.27737	4.08298	3.77435	0.77645	0.489014	-0.045941	-0.604816	0	0.037362	0.618366	0.25865	-0.096371	-0.307526	0.126803	0.565359	-0.268913	-0.04396	0.00334	0.797108	0.091486	-0.02783	-0.887279	-0.30261	0.099711	1.10463	-0.035317	-0.593189
13463914	AT4G00315	4.08536	5.30841	5.76938	5.88333	5.56966	6.13604	5.34707	4.73317	5.30523	5.77563	4.29659	5.54547	3.71476	4.26368	3.85939	3.28591	4.46654	3.97542	4.01506	4.49993	3.65248	3.50003	4.38286	3.89952	-0.370592	-1.04473	-1.90999	-2.59742	-1.10312	-2.16062	1.26171	-0.575239	-0.464148	-0.107698	-1.27307	-0.590569	0.300293	0.236251	-0.206901	0.214121	-0.083678	-0.075899	-0.961421	0.81149	0.257247	0.321819	1.18939	0.51467
13464355	AT4G01340	3.47402	3.25968	2.95987	2.60099	3.29289	3.12467	2.815	3.24911	2.71076	2.70352	2.5956	3.12467	2.81379	2.8699	2.49672	2.92977	2.49187	2.56584	2.57178	2.50859	2.71076	2.42156	2.41107	2.679	-0.660228	-0.389782	-0.463157	0.328778	-0.80102	-0.558834	-0.659018	-0.010573	-0.249116	0.102534	-0.69729	0	-0.242005	-0.361317	0.214041	-0.508211	-0.080802	0.113165	0.417013	-0.350744	0.463157	-0.610745	0.616488	0.113165
13464381	AT4G01430	6.5541	5.20452	4.5518	5.54873	6.41671	6.72184	5.8422	5.93762	6.37335	5.14996	6.77669	7.69725	7.24279	7.32235	7.12267	6.41542	6.94999	7.11565	7.27142	7.98636	7.6658	6.64938	6.61342	8.04461	0.688686	2.11783	2.57087	0.866699	0.533278	0.393805	-0.711901	0.733108	1.82155	-0.398769	0.359982	0.975409	0.028625	0.664011	0.543123	0.233959	-0.336572	0.928962	0.740526	-0.069097	-1.27842	0.632728	-0.696554	-0.046447
13464447	AT4G01535	3.27397	3.80163	3.48828	4.36326	3.55956	3.3663	5.15245	4.90389	3.56784	3.83548	2.97016	4.4933	3.19385	2.96495	3.20546	3.05646	3.07989	2.92365	3.02095	2.9993	2.9894	2.99441	2.72382	3.06919	-0.080123	-0.836687	-0.28282	-1.30679	-0.479667	-0.442645	1.87848	1.10226	0.079561	-0.527777	-0.589397	1.127	-0.172896	0.034352	-0.216054	-0.062056	-0.356067	0.145533	-2.05137	-1.0679	-0.295615	0.465721	0.23333	-0.981465
13464452	AT4G01580	8.51943	8.1218	8.55015	8.34957	8.12184	8.02474	7.8472	7.38705	7.63596	8.20687	7.64264	6.92486	6.26527	7.08765	6.43353	5.80248	5.81975	5.32262	5.6616	5.45713	5.69602	5.67727	5.64695	5.41815	-2.25417	-1.03415	-2.11661	-2.5471	-2.30209	-2.70212	-0.672235	-0.734751	-0.914181	-0.142703	-0.479196	-1.09988	-0.603662	-1.63052	-0.737513	-0.125209	-0.172804	0.095529	0.068573	-0.895765	0.176668	0.017494	0.306392	1.19541
13464739	AT4G02090	5.18683	5.17759	5.45511	6.27922	5.31285	5.72712	5.79417	5.93677	5.18762	5.89881	5.82381	5.47174	6.10567	5.56925	5.60811	6.75373	5.80478	6.22981	5.72413	6.09556	6.08864	6.29022	6.02821	5.95884	0.918839	0.391662	0.152998	0.474504	0.491924	0.502691	0.607338	0.759175	-0.267483	-0.380414	0.510954	-0.255378	-0.381536	0.526309	0.480536	-0.463506	0.223432	-0.27097	-0.988874	-0.232866	0.748019	-0.083092	-0.287522	-0.015592
13464848	AT4G02280	5.41185	6.15751	6.26474	6.52054	7.31669	8.13643	6.24358	5.92598	5.74901	6.399	7.28085	8.64769	5.86501	6.35116	6.87858	7.3766	7.31113	7.7374	5.7681	6.33763	6.49911	6.91849	7.05463	8.36278	0.453168	0.19365	0.613834	0.856057	-0.005556	-0.399032	0.83173	-0.23153	-0.515731	-0.121547	-0.035842	0.511254	-0.096914	-0.013535	-0.379466	-0.458112	-0.256501	0.625378	-0.928644	0.217995	0.136265	-0.336565	-0.220659	0.114124
13464877	AT4G02360	5.2261	4.86756	5.40278	4.50704	5.33504	6.21249	4.58132	4.6837	4.55149	6.67065	8.00709	8.90146	4.72139	4.57122	4.58469	3.99783	3.9272	3.95041	4.61524	4.62263	4.51118	4.21194	4.22269	4.58308	-0.504706	-0.296335	-0.818088	-0.509212	-1.40784	-2.26207	-0.64478	-0.183856	-0.851282	2.16361	2.67204	2.68897	-0.106145	0.051403	-0.073504	0.214105	0.295495	0.632667	0.538635	0.235259	0.777778	-1.9495	-2.37655	-2.05631
13465360	AT4G03443	6.01345	6.08785	6.34021	6.34295	6.71209	6.35994	6.81047	6.20472	6.43935	6.36382	6.57668	5.6112	4.83842	4.84579	5.23885	5.25261	5.33855	5.03956	4.27449	4.75626	4.7526	5.1985	4.96184	4.87606	-1.17503	-1.24206	-1.10136	-1.09033	-1.37354	-1.32037	0.797024	0.116873	0.099144	0.020875	-0.135414	-0.748732	-0.563934	-0.089528	-0.486245	-0.054118	-0.376711	-0.163504	-1.36096	-0.206401	-0.585389	-0.074993	-0.241297	0.585228
13465437	AT4G03811	4.3748	4.90586	5.07879	4.61341	5.38673	4.84321	5.31111	4.91184	4.64133	4.55298	5.1511	4.5815	2.87084	3.26395	3.09823	3.24699	2.53641	2.83766	2.91478	2.85117	2.80751	2.84417	2.97648	2.77565	-1.50396	-1.6419	-1.98056	-1.36643	-2.85032	-2.00555	0.936307	0.005977	-0.437468	-0.060434	-0.235631	-0.261703	0.043943	-0.412782	-0.290718	-0.402815	0.440068	-0.062006	-0.892364	-0.418759	0.14675	-0.342381	0.675699	0.199697
13465565	AT4G04260	4.53505	3.90997	4.74814	4.84764	3.87406	4.33003	3.75224	4.25396	4.43845	3.98891	3.98291	3.43073	4.15526	4.31755	4.30964	4.04307	3.85388	4.16917	3.60635	4.4813	4.58876	4.16201	4.34654	3.74851	-0.379789	0.407579	-0.438498	-0.804574	-0.020184	-0.160861	-0.78281	0.343987	-0.30969	-0.85873	0.108846	-0.899304	-0.54891	0.163745	0.279124	0.118945	0.492664	-0.420664	0.2339	-0.180242	0.588814	0.977675	0.383818	0.47864
13465628	AT4G04402	4.67595	3.32212	4.55566	4.41218	5.26373	4.74968	3.63621	5.497	8.31925	4.73208	4.71016	5.32183	10.2271	10.2045	10.348	10.4302	10.212	10.22	10.3108	10.1295	10.4859	10.3844	10.3476	9.8911	5.55116	6.8824	5.79235	6.01807	4.94827	5.47033	-1.03974	2.17489	3.76359	0.3199	-0.553567	0.572149	0.0837	-0.07499	0.13789	-0.04584	0.13565	-0.328912	1.12344	-2.24988	-3.6257	-0.36574	0.689217	-0.901061
13465681	AT4G04540	4.63224	4.29151	3.21743	4.45504	3.45506	3.65203	5.74205	3.89046	3.70003	4.34284	5.68937	6.01387	6.80581	5.71918	5.11463	6.30728	5.81822	5.75105	7.34634	6.31287	6.33115	7.08812	5.88751	6.32112	2.17358	1.42767	1.8972	1.85224	2.36316	2.09903	1.10981	-0.401048	0.482599	-0.112194	2.23432	2.36185	0.540526	0.59369	1.21653	0.780841	0.069296	0.570065	-0.569288	0.994738	0.733926	0.893035	-2.16502	-1.79178
13465922	AT4G05091	6.20814	6.975	6.52826	6.66624	7.41287	6.72762	6.81674	7.12656	7.42523	6.77067	7.04815	6.87024	6.87134	7.40083	6.90379	6.90488	7.22197	6.99786	6.91263	7.13273	7.44224	6.80895	6.84025	6.9658	0.6632	0.425838	0.37553	0.23864	-0.190897	0.27024	0.608601	0.151563	0.896963	0.104426	-0.364717	0.142624	0.041291	-0.2681	0.538448	-0.095933	-0.381724	-0.032057	-0.56731	-0.419663	-0.358515	-0.200359	-0.017007	-0.174681
13465924	AT4G05100	2.95009	2.68586	2.61815	2.40951	2.97317	2.91373	2.3591	2.85811	2.94664	3.05174	2.88678	3.71531	2.49653	2.57759	2.50335	2.48896	2.70294	2.44793	2.5324	2.68978	2.84195	2.65062	2.60116	2.60503	-0.453565	-0.10827	-0.1148	0.079446	-0.270236	-0.465803	-0.590994	0.172246	0.328493	0.642233	-0.086393	0.801583	0.035878	0.112186	0.338596	0.161661	-0.101771	0.157102	0.626872	-0.06006	0.010103	-0.480572	-0.015378	-0.644481
13465945	AT4G05190	6.37183	6.08351	6.13204	5.86425	5.96805	6.37313	5.79947	5.69082	5.67934	5.54721	6.08654	5.69985	6.41028	5.92231	6.00207	6.80394	6.50345	6.49905	6.1385	5.8158	6.1689	6.47954	6.16381	6.28389	0.038451	-0.161205	-0.129967	0.939691	0.5354	0.12592	-0.572361	-0.392689	-0.4527	-0.317037	0.118492	-0.673275	-0.271785	-0.106504	0.166829	-0.3244	-0.339633	-0.21516	0.300576	0.286185	0.619529	-0.007363	-0.458125	0.458115
13466119	AT4G06536	5.93776	5.85182	5.29065	6.12641	8.65331	9.29982	6.53725	5.81787	4.85319	6.31547	8.62203	8.52883	4.7202	4.28823	4.34557	5.29541	5.2294	4.64995	4.32284	4.60168	3.82593	4.47715	4.58863	4.93107	-1.21756	-1.56359	-0.945081	-0.830999	-3.42391	-4.64987	0.599495	-0.033958	-0.43746	0.189055	-0.031275	-0.770986	-0.397358	0.31345	-0.519638	-0.818262	-0.640766	0.281114	-0.996853	0.347408	-0.082178	-1.00732	-0.609491	1.0521
13466167	AT4G07408	5.14304	4.10983	3.22862	5.41695	4.86696	3.96473	5.72796	5.52343	4.18429	5.70854	4.52147	4.96597	3.90634	3.34032	3.5847	3.74128	3.2807	4.64892	3.78072	3.64188	4.07448	3.7474	3.54087	4.41822	-1.2367	-0.769512	0.356083	-1.67567	-1.58626	0.684183	0.584915	1.41359	0.955674	0.29158	-0.345493	1.00124	-0.125627	0.301557	0.489786	0.006117	0.260169	-0.230698	-0.710542	-1.11204	-0.465888	-0.285463	0.605662	-1.23193
13466192	AT4G07940	4.62188	4.65679	5.49926	4.56417	5.22032	5.81433	4.04481	5.12561	5.72059	5.24614	5.26256	5.52788	4.15596	3.96164	3.52333	4.15699	3.51137	3.77941	3.98922	3.66044	3.57707	3.26128	3.57668	3.68728	-0.465912	-0.695148	-1.97592	-0.407184	-1.70895	-2.03492	-0.57707	0.468816	0.221336	0.681969	0.042248	-0.286444	-0.166746	-0.301202	0.053739	-0.89571	0.065315	-0.092125	0.410324	-0.770018	-0.167597	-1.57768	0.023067	0.194319
13466208	AT4G08028	3.12946	2.90082	2.45118	2.41703	2.33922	2.53971	2.29987	2.52302	2.28789	2.34928	2.15004	2.4302	2.73453	2.61005	3.12253	2.67756	2.57852	2.41645	2.68594	2.55302	2.9078	2.44491	2.39199	2.52302	-0.394924	-0.290764	0.671343	0.260527	0.239308	-0.123265	-0.829587	-0.377794	-0.163288	-0.067751	-0.18918	-0.109513	-0.048595	-0.05703	-0.214731	-0.232655	-0.186537	0.106574	0.780992	0.320764	-0.051443	-0.164904	0.002643	0.216087
13466218	AT4G08040	8.58996	7.38334	7.34805	7.96976	7.37332	6.00014	7.99174	6.89032	6.50151	7.65361	6.17612	5.47091	9.26806	7.45583	6.54654	7.63798	7.74178	5.98823	8.67304	7.20806	6.41811	7.12345	6.66897	5.68032	0.678102	0.072495	-0.801512	-0.331773	0.368458	-0.011915	-0.598218	-0.493014	-0.846538	-0.316152	-1.19721	-0.529235	-0.595023	-0.247774	-0.128432	-0.514535	-1.07282	-0.30791	0.003195	0.24524	0.718106	-0.198383	0.124391	0.221325
13466831	AT4G09731	5.00155	3.85437	5.33903	5.77919	3.85044	5.26904	4.36384	5.38986	5.05666	5.45232	4.8717	4.67619	4.5212	4.82773	4.363	4.74872	4.86068	4.70561	4.25563	4.48805	3.89416	4.67039	4.7491	4.27865	-0.480345	0.973358	-0.976029	-1.03047	1.01024	-0.56343	-0.637709	1.53549	-0.282371	-0.326867	1.02127	-0.592847	-0.26557	-0.339683	-0.468841	-0.078326	-0.111583	-0.426963	0.372139	-1.87517	-0.18647	0.248541	-1.13285	0.165884
13466847	AT4G09784	3.65968	3.54224	4.0434	3.69671	4.02852	4.2626	3.07624	4.417	3.63946	3.14498	3.66013	5.34746	3.08318	3.793	3.62488	3.38598	3.5505	3.3977	3.33738	3.33476	3.87257	2.85907	3.51125	3.39896	-0.576499	0.250762	-0.41852	-0.310723	-0.478021	-0.864903	-0.58344	0.874758	-0.403933	-0.551729	-0.368395	1.08486	0.254199	-0.458235	0.24769	-0.526916	-0.039252	0.00126	0.837639	-1.33299	0.651623	0.024813	0.329143	-1.0836
13466851	AT4G09795	4.17556	4.99573	4.77564	4.57364	4.39637	5.06187	4.86751	4.64131	4.68237	4.72713	4.59421	4.48268	4.69189	4.79575	5.04909	4.80813	4.95258	4.72713	5.13265	4.49525	4.89043	4.49658	4.72713	4.72713	0.51633	-0.199985	0.273446	0.234485	0.556211	-0.334744	0.691953	-0.354418	-0.093273	0.153489	0.197843	-0.579195	0.440766	-0.300497	-0.158662	-0.31154	-0.225452	0	-0.251187	0.053921	-0.065389	-0.465029	-0.423295	0.579195
13467120	AT4G10510	3.57285	4.39454	3.87093	3.56382	4.32346	4.34978	4.35344	4.27198	3.48233	4.04984	3.94023	3.9853	4.24694	3.78852	3.92432	3.62911	3.90225	3.9853	3.74322	3.67949	4.23081	3.9853	3.90225	3.65666	0.674093	-0.606017	0.053385	0.065289	-0.421208	-0.364479	0.780588	-0.122557	-0.388606	0.486017	-0.383223	-0.364479	-0.503717	-0.109034	0.30649	0.356196	0	-0.32865	-1.28431	0.013523	0.695096	-0.129821	0.383223	0.035829
13467182	AT4G10660	2.28444	3.01928	2.86677	2.66215	2.48642	2.53616	3.02238	2.60795	2.68586	2.56633	2.33045	2.20562	2.58625	3.48026	2.36309	2.64876	3.33453	2.70976	2.78349	2.33045	2.84003	2.72903	2.58625	2.58625	0.301807	0.460982	-0.503675	-0.013388	0.848115	0.173604	0.737937	-0.411328	-0.180904	-0.095818	-0.155963	-0.330538	0.197243	-1.14981	0.476935	0.080271	-0.748279	-0.12351	-0.540694	-0.738482	0.657839	0.176089	-0.592316	0.207028
13467222	AT4G10850	2.28917	2.82313	2.3051	2.59181	2.36652	2.79765	2.97988	2.28552	2.52095	2.62991	2.29587	2.54577	3.08505	3.01871	2.95601	2.84041	2.89486	2.69773	2.82707	2.79976	3.1303	2.62966	2.68059	2.85314	0.79588	0.195581	0.650914	0.248591	0.528339	-0.099917	0.690713	-0.537609	0.215851	0.038094	-0.07065	-0.251874	-0.257974	-0.218947	0.174286	-0.210744	-0.21427	0.155409	-0.948687	0.318662	-0.041565	-0.248838	-0.14362	0.407283
13467243	AT4G10910	5.33695	5.26318	4.86896	5.07004	5.05821	4.53511	6.25056	5.33092	4.90383	4.70161	4.33628	4.13849	4.98457	5.14987	5.50755	5.73205	5.37845	4.09451	5.16322	5.3254	5.06046	4.73765	4.67514	4.5717	-0.35238	-0.113305	0.638584	0.662008	0.320248	-0.440598	0.913613	0.067745	0.034868	-0.368434	-0.721927	-0.396621	0.178654	0.175521	-0.447087	-0.994396	-0.703312	0.477195	-0.734959	0.107776	-0.481955	-0.625962	0.018615	0.873816
13467336	AT4G11170	5.86952	5.29042	4.44416	4.70346	4.77124	4.76651	6.45906	5.81671	7.20468	5.43624	5.59524	7.22748	4.61889	4.40992	4.7529	4.96407	4.5923	4.3935	4.65604	4.35367	4.29788	4.7636	4.36758	4.51471	-1.25064	-0.880496	0.308739	0.260602	-0.178943	-0.373002	0.589537	0.526296	2.76052	0.732773	0.824004	2.46097	0.03715	-0.056254	-0.455015	-0.20047	-0.224719	0.121207	-0.552387	-0.58255	-3.21554	-0.933243	-1.04872	-2.33977
13467349	AT4G11190	4.69712	4.4289	4.87962	4.41718	3.4207	3.83462	3.50641	3.57815	3.73049	3.47222	4.04786	3.63886	4.1357	3.49573	3.56798	3.69973	3.57903	3.57386	4.12996	3.45457	3.33961	3.89677	3.90594	4.01742	-0.56142	-0.933178	-1.31164	-0.717454	0.158327	-0.260762	-1.19071	-0.850756	-1.14913	-0.94496	0.627165	-0.19576	-0.005745	-0.04116	-0.228373	0.197041	0.32691	0.443563	1.18497	0.809596	0.920757	1.142	-0.300255	0.639323
13467390	AT4G11310	5.89494	5.73056	5.42419	5.90132	5.91401	6.0183	5.25205	6.64225	4.96748	5.70768	7.15695	7.18824	5.39248	5.03407	5.52269	4.89187	5.44126	5.38186	5.2033	5.67516	4.90859	5.19878	5.47692	5.30665	-0.502456	-0.696488	0.0985	-1.00945	-0.472749	-0.636443	-0.642888	0.911691	-0.456711	-0.193638	1.24294	1.16994	-0.189184	0.641096	-0.6141	0.306912	0.035667	-0.07521	0.453704	-0.270595	-0.157389	0.50055	-1.20728	-1.24515
13467423	AT4G11370	5.45861	5.67383	5.68108	5.90202	4.83216	4.79143	6.18181	5.47619	6.04025	5.84676	5.26391	5.55937	4.67222	4.62141	4.26385	3.48898	3.80134	3.75064	4.99451	4.77511	4.35104	4.63899	3.83745	4.18049	-0.786391	-1.05242	-1.41722	-2.41304	-1.03082	-1.04078	0.723194	-0.197636	0.359177	-0.055262	0.431752	0.767946	0.322285	0.1537	0.087185	1.15001	0.036107	0.429851	-0.400909	0.351336	-0.271992	1.20527	-0.395645	-0.338095
13467470	AT4G11460	5.9842	5.11579	4.902	6.33642	5.40479	4.1801	5.03461	5.24104	4.69667	5.54597	5.03781	4.3587	6.56849	5.5759	4.92219	6.91349	5.5471	4.76866	6.03643	5.2677	5.57658	5.89572	5.73932	3.90748	0.584294	0.460108	0.02019	0.577069	0.142319	0.588559	-0.949589	0.125245	-0.205335	-0.790448	-0.366978	0.178602	-0.532065	-0.308194	0.65439	-1.01777	0.192211	-0.86118	0.417524	-0.433439	0.859725	-0.227317	0.559189	-1.03978
13467492	AT4G11490	2.52557	2.69338	2.53265	2.95178	2.27844	2.69306	3.4872	2.41777	2.45321	2.79955	2.54491	2.60822	2.29542	2.30468	2.83081	2.63189	2.63189	2.80045	2.53321	2.40666	2.98404	2.73912	2.80111	2.58833	-0.230153	-0.388694	0.298162	-0.319886	0.353449	0.107381	0.961626	-0.275607	-0.079442	-0.152227	0.266473	-0.084848	0.237789	0.101982	0.153223	0.107234	0.169217	-0.212114	-0.723837	0.377589	0.232665	0.259461	-0.097256	-0.127266
13467518	AT4G11590	3.81219	4.32402	4.80508	4.12192	4.13619	5.01225	4.53104	5.26084	4.69194	4.65347	3.62261	5.19775	4.05947	4.75629	4.23588	3.8817	4.17745	3.99054	4.5584	4.46012	4.07368	3.90469	4.28728	4.24134	0.247277	0.432271	-0.569199	-0.24022	0.041259	-1.02171	0.718848	0.936827	-0.113132	0.531556	-0.513585	0.185503	0.498934	-0.296169	-0.162195	0.02299	0.109826	0.250801	-0.219914	-1.233	-0.049063	-0.508566	0.623411	0.065298
13467597	AT4G11780	3.53696	3.93851	4.27926	4.30695	4.54322	4.12231	4.21933	4.70656	3.90107	4.55155	4.41119	4.00866	4.39654	3.82021	4.7615	4.42548	4.23875	4.385	4.19744	4.09843	4.38194	4.61495	4.30644	4.27538	0.859586	-0.118298	0.482244	0.11853	-0.304472	0.262693	0.682372	0.768046	-0.378192	0.244602	-0.132032	-0.113645	-0.199102	0.278213	-0.379567	0.189472	0.067693	-0.109623	-0.881474	-0.489833	-0.001375	-0.05513	0.199725	0.004022
13467700	AT4G12030	6.8897	7.02423	7.85959	7.94406	9.15724	9.19827	6.18021	6.63319	8.04148	8.52203	10.0845	9.55274	7.08882	7.22661	7.08321	7.14505	7.45039	6.91016	7.07956	7.07334	7.70481	7.73533	7.50933	7.0732	0.199119	0.202382	-0.776379	-0.799003	-1.70685	-2.28811	-0.709483	-0.391038	0.181892	0.57797	0.927285	0.354464	-0.009254	-0.153276	0.621604	0.590275	0.058937	0.163036	0.700229	0.237762	0.439712	0.012305	-0.868348	-0.191428
13467776	AT4G12350	4.52901	4.95207	4.35803	5.41205	4.98234	4.93974	5.1365	4.92366	5.2072	4.82867	5.24889	4.88038	5.08435	5.21451	4.91496	4.75241	4.7157	5.38066	5.44869	5.14544	5.45595	5.39854	4.99665	5.29322	0.555347	0.262444	0.55693	-0.659647	-0.266642	0.440917	0.607498	-0.028411	0.849175	-0.583381	0.266543	-0.059363	0.364336	-0.069067	0.540995	0.646137	0.280954	-0.087439	-0.243162	-0.040656	-0.30818	1.22952	0.014411	-0.028076
13468086	AT4G13245	3.14546	3.71441	3.99007	2.75706	3.20671	3.0775	2.34805	3.17262	3.60185	3.39147	2.81537	2.59792	3.09843	3.42314	2.92602	3.17818	3.16559	3.22058	2.71154	3.62115	3.733	2.67344	3.30918	2.99774	-0.047027	-0.291277	-1.06405	0.421115	-0.041123	0.143074	-0.797403	-0.541792	-0.388215	0.634407	-0.391339	-0.479588	-0.386889	0.198009	0.806983	-0.504738	0.143589	-0.22284	0.410514	0.739801	1.1952	-1.13915	0.534928	0.256748
13468088	AT4G13261	3.27398	3.54022	3.77379	3.35613	3.29586	3.67941	3.86227	3.46492	3.3793	3.95212	3.1359	3.30771	3.72524	3.92389	3.90907	3.94943	3.49426	3.78577	4.07435	3.57102	3.88888	3.75021	3.15576	3.79789	0.451252	0.383671	0.135288	0.593294	0.198401	0.106357	0.588282	-0.075301	-0.394487	0.595989	-0.159958	-0.371706	0.349112	-0.352869	-0.02019	-0.199216	-0.3385	0.012125	-0.23917	-0.277568	0.374297	-0.795205	-0.178542	0.383831
13468147	AT4G13380	2.49267	2.90356	3.57912	3.01636	3.14398	3.73318	3.1216	3.88718	2.68221	3.4557	3.10948	3.06141	3.02241	2.8135	2.57227	3.0901	2.48549	3.308	3.15544	2.84162	3.01636	3.12063	3.13118	3.44863	0.529744	-0.09007	-1.00685	0.073738	-0.65849	-0.425178	0.628934	0.98361	-0.896912	0.439335	-0.034499	-0.671761	0.133026	0.028124	0.444095	0.030533	0.64569	0.14063	-0.495908	-0.955486	1.34101	-0.408802	0.680189	0.812391
13468159	AT4G13480	2.92503	2.72514	2.5686	3.04482	3.15178	3.26791	2.24091	2.84041	2.86667	2.94409	3.39117	3.1832	2.67806	2.80853	3.3938	3.666	3.4802	3.53477	3.14965	2.52042	3.6946	3.41592	3.23751	3.19965	-0.246976	0.083385	0.825201	0.621174	0.328418	0.26686	-0.684129	0.115264	0.298075	-0.100736	0.23939	-0.084714	0.471592	-0.288101	0.300799	-0.25008	-0.242686	-0.335122	1.15572	-0.403365	0.002724	-0.149344	-0.482076	-0.250408
13468282	AT4G13760	2.53594	2.36125	3.42247	2.28155	2.74545	2.57723	3.35136	2.50104	3.19385	2.64278	2.88678	2.76048	2.79469	2.63112	3.1687	2.74545	2.50725	3.05184	2.89641	2.74545	2.26807	2.30218	3.12357	3.56532	0.258757	0.269869	-0.25377	0.4639	-0.238202	0.474608	0.81542	0.139792	-0.228623	0.361233	0.141329	0.183244	0.101712	0.114332	-0.900626	-0.443268	0.616325	0.513483	-0.713708	-0.02546	-0.672003	-0.804501	0.474996	0.330239
13468405	AT4G14180	4.56416	4.35285	4.29583	4.11128	4.49034	4.37325	3.74924	4.55316	3.90379	3.76028	3.72997	4.45298	4.782	4.35412	4.01517	4.16972	4.06254	4.32602	4.60213	3.95011	4.06656	4.53322	4.43702	5.19489	0.217835	0.001271	-0.280654	0.058441	-0.427805	-0.04723	-0.814922	0.200312	-0.392038	-0.351004	-0.760368	0.079738	-0.179871	-0.404012	0.051392	0.363492	0.374486	0.868873	0.635051	-0.604324	0.44343	0.714496	1.13485	0.789135
13468588	AT4G14640	4.58817	3.63029	4.36315	4.55097	3.67321	3.9666	3.48396	3.55544	3.89821	4.95573	3.55441	4.84849	4.83943	4.50106	5.43355	6.24916	4.45618	4.71263	4.90728	4.55762	4.92651	6.27897	4.79776	4.98531	0.251253	0.870775	1.0704	1.69819	0.782972	0.746021	-1.10422	-0.074854	-0.464935	0.404755	-0.1188	0.88188	0.067857	0.056551	-0.50704	0.02981	0.341579	0.272689	1.17207	0.131405	-0.042105	-0.374945	0.460379	-0.609191
13468618	AT4G14723	4.99242	4.41556	4.04984	4.41752	3.64726	3.94296	4.23931	4.53157	4.85244	3.99336	4.31175	3.91479	4.71999	4.45348	4.65499	4.54042	4.45901	4.48461	4.74545	4.33006	4.36447	4.14665	4.39402	4.31193	-0.27243	0.037921	0.605154	0.122902	0.81175	0.541649	-0.753117	0.116006	0.802603	-0.424159	0.664486	-0.028169	0.025453	-0.123426	-0.290523	-0.393769	-0.064991	-0.172686	0.77857	-0.239432	-1.09313	0.03039	-0.729477	-0.144517
13468878	AT4G15215	4.01554	5.14442	6.13759	5.98194	5.44107	5.26775	4.60952	5.69529	5.70096	5.9378	5.22855	4.92643	4.16634	5.7457	5.89961	4.98339	4.78796	4.81073	4.6333	5.35544	5.86541	5.53507	5.13117	4.72683	0.150799	0.601276	-0.237975	-0.998551	-0.653105	-0.457018	0.593976	0.550873	-0.436623	-0.044143	-0.21252	-0.34132	0.466956	-0.390252	-0.034199	0.551679	0.34321	-0.083899	-0.12702	-0.941125	0.402424	0.595822	0.55573	0.257421
13468972	AT4G15280	4.71298	5.31411	4.35813	4.78042	4.85699	5.06157	5.60527	5.4175	4.95729	5.02269	5.50302	6.3107	6.81624	6.14705	5.54652	5.9883	6.05691	5.92516	6.75833	6.20769	6.48455	6.6531	6.33358	6.51528	2.10326	0.832938	1.18839	1.20788	1.19992	0.863598	0.892297	0.10339	0.59916	0.242278	0.646025	1.24913	-0.05791	0.060639	0.938021	0.664803	0.276675	0.590112	-0.950207	-0.042751	0.338861	0.422525	-0.36935	-0.65902
13468983	AT4G15350	4.65349	5.27855	5.33053	5.466	4.63287	5.67969	5.33053	6.20048	5.18664	5.56134	4.86531	5.50991	5.87494	5.60736	5.41517	5.54735	5.07971	5.51394	5.44554	5.65377	5.22368	5.32412	4.84143	5.26835	1.22145	0.328803	0.084639	0.081355	0.44684	-0.165756	0.677046	0.921933	-0.143891	0.095346	0.232436	-0.169788	-0.429395	0.046417	-0.191492	-0.223229	-0.238284	-0.245587	-1.10644	-0.875516	-0.047601	-0.318575	-0.47072	-0.075799
13468987	AT4G15360	3.22164	3.04701	3.08444	3.67254	3.14036	3.55003	3.86759	3.32953	2.76989	3.41327	3.44249	2.94789	3.07904	2.92441	2.88446	3.20947	3.42112	2.86116	3.11107	3.03127	2.82345	2.82458	3.24404	3.00061	-0.142594	-0.122602	-0.199979	-0.463076	0.280764	-0.688873	0.645947	0.282515	-0.314551	-0.25927	0.302133	-0.602141	0.032025	0.106855	-0.061011	-0.384887	-0.177082	0.139455	-0.613922	-0.17566	0.25354	-0.125617	-0.479215	0.741596
13469169	AT4G15620	7.04455	6.91244	7.72468	7.33558	8.1039	9.27624	6.13712	5.72653	7.03314	7.27303	8.42776	7.966	5.44564	5.8544	5.71028	5.56994	6.24555	6.62272	5.34501	5.90165	6.28318	5.81404	5.89808	5.87367	-1.59892	-1.05804	-2.0144	-1.76565	-1.85835	-2.65353	-0.907432	-1.18591	-0.691531	-0.062555	0.323857	-1.31024	-0.100628	0.047245	0.572909	0.244107	-0.347468	-0.749044	0.806804	1.23316	1.26444	0.306662	-0.671325	0.561197
13469490	AT3G50840	5.45116	6.45662	6.18179	5.87783	6.46482	6.08981	6.02599	6.31025	5.17017	5.84563	6.0105	6.21199	6.04105	5.30366	5.89735	5.42062	5.68134	5.44171	5.3334	5.65522	6.17233	4.96987	6.00998	5.36454	0.589891	-1.15296	-0.284443	-0.457214	-0.783479	-0.648102	0.574824	-0.146377	-1.01162	-0.032199	-0.454323	0.122184	-0.707654	0.351566	0.274982	-0.450745	0.328635	-0.07717	-1.28248	0.497943	1.2866	-0.418546	0.782958	-0.199354
13469746	AT4G16855	2.1773	2.48425	2.71191	2.99534	2.5316	2.67112	3.3624	2.45555	2.42645	2.7266	2.66716	2.59307	2.76695	2.71712	3.15143	3.61534	2.93318	2.54699	2.60452	2.95142	2.94156	2.98191	2.9324	2.88345	0.589654	0.232876	0.439525	0.619998	0.401577	-0.124134	1.1851	-0.028698	-0.285453	-0.268746	0.135557	-0.078054	-0.162435	0.234295	-0.209873	-0.633434	-0.000781	0.336464	-1.34754	0.262993	0.07558	-0.364688	-0.136338	0.414518
13470053	AT4G17690	4.30892	4.11536	3.53312	4.29082	3.98895	3.50756	3.70757	3.81926	3.93165	4.06038	3.75739	4.04741	4.39793	4.20942	4.49676	4.41579	4.04437	4.50615	4.24309	4.02335	4.05472	4.3278	4.07985	4.19835	0.089007	0.094057	0.963644	0.124965	0.055423	0.998586	-0.601346	-0.296102	0.398529	-0.23044	-0.231565	0.539853	-0.154832	-0.186069	-0.442044	-0.087993	0.035475	-0.307794	0.446514	0.110033	-0.840573	0.142447	0.26704	-0.847647
13470167	AT4G17970	5.02168	6.08816	6.39349	5.66712	6.99664	6.2805	5.67365	5.64556	5.8899	5.24838	6.59256	5.72147	4.8572	5.78557	5.35643	4.89132	6.05865	5.58342	4.98597	4.98334	5.1239	4.56265	5.75349	4.96127	-0.164479	-0.302586	-1.03706	-0.775804	-0.937986	-0.69708	0.651968	-0.442598	-0.503594	-0.418747	-0.404076	-0.559024	0.128775	-0.802231	-0.232533	-0.328671	-0.30516	-0.622142	-0.523193	-0.359633	0.271061	0.090076	0.098916	-0.063118
13470339	AT4G18375	6.99507	6.95218	6.63638	7.02628	6.83655	6.5131	6.29878	6.24949	6.53318	6.99481	6.62116	5.96159	7.61174	7.39124	7.47536	8.52987	7.85122	7.63784	7.37885	7.19141	7.23331	8.04846	7.49617	7.25403	0.616668	0.439063	0.838986	1.5036	1.01467	1.12473	-0.696294	-0.702692	-0.103194	-0.031464	-0.215388	-0.551511	-0.232889	-0.199834	-0.242056	-0.481411	-0.355048	-0.383806	0.463405	0.502858	-0.138862	-0.449947	-0.13966	0.167705
13470719	AT4G19191	6.54984	6.91897	7.11946	6.91584	6.36679	6.74479	5.91627	7.16161	6.89496	7.01057	5.66438	6.25922	5.70659	6.21273	7.06449	6.64866	5.77116	6.21709	6.319	6.64785	6.5255	6.71331	6.37262	6.19529	-0.843254	-0.706243	-0.054968	-0.267183	-0.595635	-0.5277	-0.633569	0.24264	-0.224503	0.09473	-0.702408	-0.485569	0.612408	0.435119	-0.538994	0.064653	0.601469	-0.021804	1.24598	0.192479	-0.314491	-0.030077	1.30388	0.463765
13470769	AT4G19340	4.05291	5.36891	5.32387	4.85417	4.74159	5.94412	4.91588	6.02441	3.992	5.15593	4.64541	5.70453	3.07993	3.4434	2.72466	3.4883	2.96653	2.92876	3.22404	3.00468	3.48328	3.02193	2.96735	3.02112	-0.972972	-1.92551	-2.59921	-1.36587	-1.77506	-3.01536	0.86297	0.655502	-1.33187	0.301754	-0.096181	-0.239583	0.144108	-0.438726	0.758623	-0.466375	0.000824	0.092359	-0.718862	-1.09423	2.09049	-0.768129	0.097005	0.331942
13471418	AT4G21050	2.78186	3.20069	3.23443	3.10458	2.89138	3.12826	3.37225	2.53951	2.76383	2.87343	2.93503	3.02726	3.33868	2.93312	3.47449	3.51536	3.21746	3.7296	3.46247	3.29499	3.32976	3.52638	3.07667	3.10948	0.556827	-0.267566	0.24006	0.410787	0.326086	0.601339	0.59039	-0.661175	-0.470602	-0.231143	0.043649	-0.101002	0.123781	0.361875	-0.144726	0.011021	-0.140792	-0.620115	-0.466609	1.02305	0.325876	0.242164	-0.184441	-0.519113
13471433	AT4G21065	6.1392	6.55031	6.29495	5.96755	5.41808	5.6951	5.52743	6.16479	6.15339	5.93749	5.77594	5.3588	5.19986	5.40526	5.25638	4.72528	5.22725	5.32132	5.16938	5.83473	6.0214	5.22924	5.02667	5.09676	-0.939346	-1.14505	-1.03857	-1.24227	-0.190836	-0.373781	-0.611779	-0.385514	-0.141557	-0.030054	0.357853	-0.336292	-0.030474	0.429472	0.765019	0.503961	-0.200577	-0.224556	0.581305	0.814986	0.906576	0.534015	-0.55843	0.111736
13471939	AT4G21950	3.55511	3.82357	2.50711	3.05532	2.62305	2.9349	2.70383	3.35486	3.17202	3.01197	3.52328	4.57216	4.48557	3.49502	4.2369	3.98287	3.95548	4.27407	4.1005	4.63852	4.66012	4.02465	5.55892	5.43069	0.930454	-0.328551	1.72979	0.927546	1.33243	1.33917	-0.851285	-0.468708	0.664904	-0.043356	0.90023	1.63726	-0.38507	1.1435	0.423223	0.041786	1.60344	1.15662	0.466215	1.61221	-0.241681	0.085142	0.703214	-0.480643
13472007	AT4G22180	2.8889	2.93383	3.2991	3.19273	3.22886	3.98573	3.53322	3.68838	3.01777	2.89844	3.14893	3.69638	3.12761	3.59689	3.53487	2.90586	3.27832	3.28479	3.41809	3.18554	3.3676	3.48208	3.28963	3.19395	0.238708	0.663066	0.235765	-0.28687	0.049462	-0.70094	0.644313	0.754557	-0.281336	-0.294296	-0.07993	-0.289345	0.290476	-0.411349	-0.167266	0.576215	0.011309	-0.090835	-0.353837	-1.16591	0.11407	0.870511	0.091239	0.19851
13472017	AT4G22214	3.65535	3.86604	3.58128	4.19625	3.73371	4.18168	4.39344	4.1837	3.7865	3.71052	4.49261	4.41798	5.39299	4.64421	4.53179	5.33572	4.35459	4.7194	5.21122	4.59654	5.36839	4.52742	4.241	5.00477	1.73763	0.778165	0.950501	1.13947	0.620871	0.537722	0.738093	0.317663	0.205214	-0.485726	0.758899	0.236304	-0.181769	-0.047668	0.836606	-0.808302	-0.113584	0.285366	-0.919862	-0.365331	0.631392	-0.322576	-0.872483	0.049062
13472072	AT4G22440	3.34627	3.55592	3.66379	3.61671	3.48447	3.56073	3.95486	4.50552	3.22539	3.51492	3.47506	3.73582	4.3416	3.93988	3.81347	4.07354	4.18539	3.7899	3.92562	3.75825	4.29304	3.86521	3.90245	3.31558	0.995329	0.383955	0.149679	0.456832	0.700922	0.229175	0.608597	0.949597	-0.438405	-0.101789	-0.009413	0.17509	-0.41598	-0.181625	0.479571	-0.20833	-0.282937	-0.474328	-1.02458	-1.13122	0.917976	-0.106541	-0.273524	-0.649418
13472145	AT4G22758	5.30604	4.76624	4.25806	4.94763	5.14151	5.32043	4.64549	4.19231	4.36165	5.22665	5.23205	5.0914	4.37653	4.5225	4.45176	5.26635	4.96744	5.06499	4.26023	4.91121	5.02201	5.06929	5.00202	5.62446	-0.929503	-0.243733	0.193696	0.31872	-0.174072	-0.255439	-0.660544	-0.573923	0.103592	0.279026	0.090546	-0.229032	-0.116302	0.388708	0.570252	-0.197057	0.034587	0.559472	0.544242	0.962631	0.46666	-0.476083	-0.055959	0.788504
13472256	AT4G23030	7.01818	6.78826	6.32224	7.31002	6.1764	6.38689	7.62017	7.52681	6.61514	7.20812	7.11276	7.44907	8.32867	7.39954	7.02419	7.90875	7.18321	7.31006	8.25405	7.77	7.55719	8.36454	7.48936	7.50829	1.3105	0.611285	0.701954	0.59873	1.00682	0.923167	0.601991	0.738552	0.292906	-0.101907	0.936368	1.06217	-0.074621	0.370452	0.533	0.455785	0.306143	0.198231	-0.676612	-0.3681	0.240094	0.557692	-0.630225	-0.863942
13472344	AT4G23280	6.33535	6.27093	5.73959	6.28331	5.5341	4.3083	7.50001	7.37884	6.66386	6.07113	5.89234	4.56256	7.82055	7.30297	7.01996	7.12023	6.71982	5.75758	8.42306	7.99766	7.54267	7.10386	7.28432	6.49509	1.4852	1.03205	1.28037	0.836921	1.18572	1.44928	1.16465	1.10791	0.924271	-0.212176	0.358248	0.254265	0.602508	0.694687	0.522705	-0.016372	0.564499	0.737514	-0.562144	-0.413227	-0.401566	0.195804	0.206251	0.483249
13472388	AT4G23410	5.85647	6.04026	6.08936	5.36991	5.82422	5.17001	6.66529	6.24157	5.51347	5.26082	5.25539	4.67558	6.30362	6.22842	5.85548	5.64342	5.77998	5.35302	6.0636	6.3725	6.10847	5.8248	5.78948	5.11727	0.447143	0.188159	-0.233881	0.273518	-0.044236	0.183007	0.808816	0.201305	-0.575899	-0.109083	-0.568828	-0.494433	-0.240022	0.144074	0.252985	0.181377	0.009493	-0.235748	-1.04884	-0.057231	0.828884	0.29046	0.578321	0.258685
13472529	AT4G23750	5.8995	5.76075	6.04988	6.16571	5.57897	6.00425	5.31575	5.48548	5.45924	5.7162	5.353	5.03568	5.73386	5.94763	5.63672	5.36897	5.76748	6.17473	5.09369	5.05825	5.6463	5.38179	5.38854	5.57812	-0.165641	0.186885	-0.41316	-0.796747	0.188513	0.17048	-0.58375	-0.275264	-0.590634	-0.449511	-0.225974	-0.96857	-0.640168	-0.889378	0.00958	0.012822	-0.378947	-0.596602	-0.056418	-0.614114	0.600214	0.462333	-0.152973	0.371968
13472862	AT4G24340	3.74692	3.03332	3.16647	2.985	3.42419	3.06339	2.76819	3.04351	3.50498	3.90958	4.77782	5.09597	2.80779	3.18295	3.08361	3.63347	3.12806	2.66513	3.37275	3.09184	3.06298	3.2756	3.52854	3.13136	-0.939127	0.149628	-0.08286	0.648463	-0.296129	-0.398258	-0.978725	0.010189	0.338506	0.924576	1.35362	2.03258	0.564957	-0.091112	-0.020638	-0.357862	0.400483	0.466225	1.54368	-0.101301	-0.359144	-1.28244	-0.953141	-1.56635
13472909	AT4G24420	4.53743	4.979	5.45048	4.52209	4.18806	4.5888	3.75876	5.17897	5.94796	4.50347	4.36454	5.12947	7.72745	8.29311	8.42019	7.64671	7.81653	7.90836	7.71697	8.52365	8.54281	7.82977	8.16183	8.16738	3.19002	3.3141	2.96971	3.12462	3.62846	3.31957	-0.778674	0.199968	0.497472	-0.018621	0.176482	0.540673	-0.010481	0.230543	0.122623	0.183056	0.345304	0.25902	0.768193	0.030575	-0.374849	0.201677	0.168822	-0.281653
13473092	AT4G24790	6.02639	6.62874	6.75674	6.55091	7.26939	7.15813	6.75624	6.39534	6.43543	6.33838	6.94876	6.35084	6.08845	6.62212	6.45633	6.44159	6.88027	6.84332	6.01274	6.29319	6.53202	5.9667	6.6318	6.36778	0.062066	-0.006617	-0.300411	-0.109323	-0.389118	-0.314808	0.729851	-0.233402	-0.321315	-0.212537	-0.320627	-0.807287	-0.075713	-0.328935	0.075692	-0.474887	-0.248479	-0.475533	-0.805564	-0.095533	0.397007	-0.26235	0.072148	0.331754
13473187	AT4G24975	4.49834	3.79692	4.33644	3.89345	4.00966	4.2753	3.46261	4.40973	3.31296	3.99379	4.28233	4.12881	3.74114	3.70847	3.57567	3.79674	3.18557	3.21202	4.141	3.31988	3.45341	3.16233	3.42815	3.14487	-0.757205	-0.088447	-0.760767	-0.096711	-0.824082	-1.06328	-1.03574	0.612813	-1.02348	0.10034	0.272669	-0.146485	0.399855	-0.388592	-0.122262	-0.634411	0.242575	-0.067153	1.43559	-1.00141	0.901214	-0.734751	-0.030094	0.079332
13473385	AT4G25410	3.42177	3.33577	3.23126	3.45197	3.35008	3.47923	2.8394	3.25849	3.51574	3.07913	3.42264	3.06879	3.61223	3.56359	3.09752	3.42028	2.95666	3.13435	3.0763	3.2649	3.40464	3.09533	3.09993	3.12478	0.19045	0.227826	-0.133743	-0.031695	-0.393417	-0.344881	-0.582375	-0.077276	0.28448	-0.372842	0.072566	-0.41044	-0.535929	-0.298698	0.307125	-0.324946	0.14327	-0.009569	0.046446	-0.221422	0.022645	0.047896	0.070704	0.400871
[truncated: 483 more rows]
[truncated: 26 more columns]

## Sheet: 4h
Affymetrix ST 1.0 Probe	New locus	2h Col-0 Mock	4h Col-0 Mock	8h Col-0 Mock	16h Col-0 Mock	24h Col-0 Mock	48h Col-0 Mock	2h Col-0 Pst	4h Col-0 Pst	8h Col-0 Pst	16h Col-0 Pst	24h Col-0 Pst	48h Col-0 Pst	2h C24 Mock	4h C24 Mock	8h C24 Mock	16h C24 Mock	24h C24 Mock	48h C24 Mock	2h C24 Pst	4h C24 Pst	8h C24 Pst	16h C24 Pst	24h C24 Pst	48h C24 Pst	2h C24 Mock - Col-0 Mock	4h C24 Mock - Col-0 Mock	8h C24 Mock - Col-0 Mock	16h C24 Mock - Col-0 Mock	24h C24 Mock - Col-0 Mock	48h C24 Mock - Col-0 Mock	2h Col-0 Pst - Mock	4h Col-0 Pst - Mock	8h Col-0 Pst - Mock	16h Col-0 Pst - Mock	24h Col-0 Pst - Mock	48h Col-0 Pst - Mock	2h C24 Pst - Mock	4h C24 Pst - Mock	8h C24 Pst - Mock	16h C24 Pst - Mock	24h C24 Pst - Mock	48h C24 Pst - Mock	2h C24 Pst - Col-0 Pst (each Mock subtracted)	4h C24 Pst - Col-0 Pst (each Mock subtracted)	8h C24 Pst - Col-0 Pst (each Mock subtracted)	16h C24 Pst - Col-0 Pst (each Mock subtracted)	24h C24 Pst - Col-0 Pst (each Mock subtracted)	48h C24 Pst - Col-0 Pst (each Mock subtracted)
[truncated: 1,306 more rows]
[truncated: 26 more columns]

[truncated: 4 more sheets: 8h, 16h, 24h, 48h]
