# Supplementary material for: Transcriptomic and Metabolomic Analysis of a Pseudomonas-Resistant versus a Susceptible Arabidopsis Accession
Source: Int J Mol Sci. 2022 Oct 11;23(20):12087. doi: 10.3390/ijms232012087 (PMC9603445; doi:10.3390/ijms232012087)
Supplement: Supplementary file 1 [file ijms-23-12087-s001.zip › Supplemental Table S8.xlsx]

## Sheet: 2h
Table S8: C24 unique differentially expressed genes related to defense responses after Pst infection.
Affymetrix ST 1.0 Probe	New locus	2h Col-0 Mock	4h Col-0 Mock	8h Col-0 Mock	16h Col-0 Mock	24h Col-0 Mock	48h Col-0 Mock	2h Col-0 Pst	4h Col-0 Pst	8h Col-0 Pst	16h Col-0 Pst	24h Col-0 Pst	48h Col-0 Pst	2h C24 Mock	4h C24 Mock	8h C24 Mock	16h C24 Mock	24h C24 Mock	48h C24 Mock	2h C24 Pst	4h C24 Pst	8h C24 Pst	16h C24 Pst	24h C24 Pst	48h C24 Pst	2h C24 Mock - Col-0 Mock	4h C24 Mock - Col-0 Mock	8h C24 Mock - Col-0 Mock	16h C24 Mock - Col-0 Mock	24h C24 Mock - Col-0 Mock	48h C24 Mock - Col-0 Mock	2h Col-0 Pst - Mock	4h Col-0 Pst - Mock	8h Col-0 Pst - Mock	16h Col-0 Pst - Mock	24h Col-0 Pst - Mock	48h Col-0 Pst - Mock	2h C24 Pst - Mock	4h C24 Pst - Mock	8h C24 Pst - Mock	16h C24 Pst - Mock	24h C24 Pst - Mock	48h C24 Pst - Mock	2h C24 Pst - Col-0 Pst (each Mock subtracted)	4h C24 Pst - Col-0 Pst (each Mock subtracted)	8h C24 Pst - Col-0 Pst (each Mock subtracted)	16h C24 Pst - Col-0 Pst (each Mock subtracted)	24h C24 Pst - Col-0 Pst (each Mock subtracted)	48h C24 Pst - Col-0 Pst (each Mock subtracted)
13334158	AT1G01010	5.8407	5.662	5.97395	5.94164	5.43894	5.92212	6.09129	6.00116	6.7156	6.10156	6.49595	7.0426	7.39301	7.30856	7.7619	8.12088	7.84526	7.93193	8.04711	7.91422	7.94972	8.32385	8.19488	8.14125	1.5523	1.64655	1.78795	2.17924	2.40633	2.00981	0.250584	0.339157	0.741646	0.159917	1.05702	1.12048	0.654109	0.605659	0.187821	0.202964	0.349617	0.20932	0.403525	0.266502	-0.553825	0.043047	-0.707398	-0.911158
13334341	AT1G01480	3.26941	3.42363	3.19663	3.27618	3.45382	3.39455	3.82612	3.57832	3.43547	3.36911	4.38689	5.46568	3.64683	3.79507	3.47614	3.57993	3.7603	4.01013	4.81375	4.04744	3.63069	4.49894	3.85877	5.4166	0.377428	0.371431	0.279514	0.303745	0.30648	0.615576	0.556712	0.154685	0.238841	0.09293	0.933068	2.07112	1.16692	0.252379	0.154546	0.919015	0.098465	1.40647	0.610206	0.097694	-0.084295	0.826085	-0.834603	-0.664658
13334363	AT1G01520	4.62755	4.51065	4.90992	4.63175	7.02984	6.74502	4.20541	5.02448	4.20558	4.8103	6.45539	6.97447	3.9914	4.3482	3.90225	4.91181	7.42886	7.11864	4.76053	4.59127	3.90689	4.20215	7.06577	6.72223	-0.636149	-0.162455	-1.00767	0.280062	0.399019	0.373627	-0.422139	0.51383	-0.704344	0.17855	-0.574445	0.229458	0.769129	0.243074	0.004637	-0.709655	-0.363082	-0.396413	1.19127	-0.270756	0.708981	-0.888205	0.211363	-0.625871
13334478	AT1G01720	7.11597	6.05956	6.61228	7.05715	7.78152	7.96129	7.13274	6.65942	6.74567	7.53524	7.79871	8.13937	6.95046	6.53294	6.93349	7.22082	7.60887	7.76935	7.80852	7.18784	7.47685	7.78142	7.60649	8.19944	-0.165504	0.473387	0.321211	0.163669	-0.172654	-0.191944	0.016778	0.599861	0.133397	0.478091	0.017188	0.178081	0.858059	0.654896	0.54336	0.560604	-0.002383	0.430089	0.841281	0.055035	0.409963	0.082513	-0.019571	0.252008
13334511	AT1G01780	7.34874	7.60873	7.52129	7.08487	7.31013	7.12723	7.44651	7.44573	7.48279	7.24526	7.12633	6.97141	6.80204	7.21589	7.18201	7.24669	7.01823	7.10755	7.50826	7.54089	7.58269	7.34498	7.06463	6.98197	-0.5467	-0.392844	-0.339274	0.161821	-0.291893	-0.019688	0.097771	-0.163002	-0.038498	0.16039	-0.183795	-0.155827	0.706218	0.324998	0.400678	0.098289	0.046394	-0.125571	0.608447	0.488	0.439176	-0.062101	0.230189	0.030256
13334833	AT1G02350	5.57111	5.36838	5.0339	4.78	6.1198	4.99616	5.50514	4.9894	4.76528	4.40954	4.79342	4.33822	5.81078	5.56508	5.08808	5.08487	5.71602	4.96969	5.14773	5.55356	4.79668	4.57369	5.33254	4.72517	0.239668	0.196704	0.054183	0.304869	-0.403783	-0.026468	-0.065969	-0.378973	-0.268621	-0.370458	-1.32638	-0.657935	-0.663048	-0.011521	-0.2914	-0.511187	-0.38348	-0.244521	-0.597079	0.367452	-0.022779	-0.140729	0.942905	0.413414
13334842	AT1G02380	7.04494	6.5881	6.42638	5.81766	6.21667	5.8293	7.29427	7.03507	5.6334	6.30545	5.94609	5.21323	6.8609	6.28173	5.53871	6.01273	6.19807	6.11073	6.1199	5.9403	5.4285	5.46641	5.81389	5.57147	-0.184038	-0.306363	-0.887668	0.195064	-0.018599	0.281428	0.249335	0.446976	-0.792986	0.487782	-0.270583	-0.616069	-0.740999	-0.341432	-0.110212	-0.546322	-0.384181	-0.539258	-0.990334	-0.788408	0.682774	-1.0341	-0.113598	0.076811
13334849	AT1G02390	7.56943	7.60865	8.01492	7.74714	8.71276	9.80141	8.05066	7.73361	8.06865	8.06297	8.98927	9.77631	8.7959	8.35784	8.97254	8.72191	9.12382	9.74122	9.4429	8.8676	8.5796	8.76159	9.21406	10.2234	1.22647	0.749194	0.957617	0.974767	0.411068	-0.06019	0.48123	0.124962	0.053727	0.315823	0.276519	-0.025096	0.647007	0.509761	-0.392941	0.039684	0.090236	0.482235	0.165777	0.384799	-0.446668	-0.276139	-0.186283	0.507331
13334881	AT1G02520	2.62563	2.9619	2.55388	3.21033	2.43489	3.71329	3.20659	2.49308	2.9516	3.30324	3.27299	3.52854	3.33272	4.50907	3.0611	3.98067	4.01151	3.18846	4.18649	3.76467	3.07811	4.14665	3.68754	3.64706	0.707096	1.54717	0.507227	0.770344	1.57662	-0.52483	0.58096	-0.468813	0.397728	0.092911	0.838101	-0.184749	0.85377	-0.744393	0.01701	0.165975	-0.323966	0.458599	0.27281	-0.27558	-0.380718	0.073064	-1.16207	0.643348
13335042	AT1G02850	6.5271	6.92601	6.97104	7.84839	7.17473	8.19267	7.09061	7.92885	8.30208	8.49054	8.49196	9.22344	6.56513	7.45427	7.5061	7.82398	7.35846	8.50137	8.036	8.21263	8.15833	8.93455	8.54541	9.26798	0.038028	0.528258	0.535059	-0.024411	0.183728	0.308702	0.563509	1.00284	1.33104	0.642147	1.31723	1.03077	1.47087	0.758361	0.652228	1.11057	1.18694	0.766612	0.907363	-0.244477	-0.678816	0.468421	-0.130285	-0.264154
13335201	AT1G03170	3.61876	3.58227	4.00878	3.59083	3.16964	3.03214	3.49468	3.53073	3.54049	3.59216	3.23392	3.36429	3.56917	3.27048	3.26702	3.26212	3.05202	3.20072	2.72902	3.4869	3.13493	3.37768	3.1629	3.33262	-0.049593	-0.31178	-0.741766	-0.328709	-0.117625	0.168582	-0.124084	-0.051532	-0.468294	0.001329	0.064281	0.332157	-0.84015	0.216413	-0.132085	0.115556	0.110883	0.131904	-0.716066	0.267945	0.336209	0.114227	0.046602	-0.200253
13335356	AT1G03495	7.49139	7.97645	8.13015	6.72748	7.95791	8.6637	7.5217	7.91321	8.30827	7.48889	8.32276	10.593	5.41019	6.13675	6.34838	5.75596	6.15415	6.07878	6.42765	6.87319	7.28955	5.46712	6.83418	6.24436	-2.0812	-1.83971	-1.78177	-0.971519	-1.80376	-2.58492	0.030303	-0.063244	0.178113	0.761411	0.364847	1.92933	1.01746	0.736443	0.941164	-0.288841	0.680034	0.165574	0.987155	0.799687	0.763051	-1.05025	0.315187	-1.76376
13335407	AT1G03710	4.49605	4.17162	4.8859	4.64848	4.5201	4.59878	4.57942	4.48288	4.60787	3.87912	4.56358	4.50293	5.01014	5.90191	5.81475	5.03188	5.90043	5.91622	6.21872	6.13691	6.32594	4.64179	5.9952	5.22825	0.514086	1.73029	0.92885	0.383395	1.38033	1.31744	0.083373	0.31126	-0.278028	-0.769357	0.043478	-0.095846	1.20858	0.235006	0.51119	-0.390087	0.094773	-0.687966	1.12521	-0.076254	0.789218	0.37927	0.051295	-0.59212
13335496	AT1G03920	5.81922	5.49951	5.62876	5.5394	5.65743	5.68263	5.70028	5.8953	5.33986	5.14864	5.70747	5.18291	5.64209	5.16926	5.27097	5.23263	5.32483	5.44922	4.81504	5.25032	5.58458	5.08218	5.34429	5.26011	-0.177131	-0.330243	-0.357787	-0.306772	-0.332603	-0.233412	-0.118941	0.395795	-0.288898	-0.390755	0.050037	-0.499722	-0.827053	0.081058	0.313609	-0.150449	0.019463	-0.189108	-0.708112	-0.314737	0.602507	0.240306	-0.030574	0.310614
13336011	AT1G05200	7.66187	7.68016	7.46509	7.05926	7.53085	7.13575	7.76373	7.40107	7.39754	7.33322	7.39019	7.20888	5.30477	5.64767	5.9591	5.93121	6.27592	6.1368	6.11709	6.01998	5.86313	5.88641	6.03026	5.78513	-2.3571	-2.03248	-1.50599	-1.12805	-1.25493	-0.998944	0.101861	-0.279089	-0.067549	0.273964	-0.140655	0.073129	0.812322	0.372305	-0.095979	-0.044793	-0.245655	-0.351675	0.710461	0.651394	-0.02843	-0.318757	-0.105	-0.424804
13336087	AT1G05420	7.55658	6.99576	6.91311	6.80891	7.0442	6.95421	7.47938	7.41347	6.03514	6.08401	6.98588	5.95238	6.20704	4.51782	5.54831	5.8577	6.20278	6.10062	5.53393	4.93356	4.7381	5.84633	5.92684	5.33618	-1.34954	-2.47794	-1.36481	-0.951214	-0.841423	-0.853598	-0.077198	0.41771	-0.877968	-0.724899	-0.058323	-1.00184	-0.673104	0.415735	-0.810204	-0.011375	-0.275941	-0.764431	-0.595906	-0.001975	0.067764	0.713524	-0.217618	0.237406
13336125	AT1G05560	8.96959	9.12922	9.85835	9.89058	9.66483	9.7904	9.53024	9.43735	10.0984	10.3442	9.76279	9.38245	8.52642	8.80692	9.57859	9.81771	9.54552	9.14341	9.78544	9.44486	9.88994	10.2062	9.34664	8.95887	-0.44317	-0.322293	-0.279764	-0.072867	-0.119307	-0.646989	0.560645	0.308131	0.240088	0.453613	0.097968	-0.407954	1.25901	0.637934	0.311356	0.38847	-0.198878	-0.184542	0.698369	0.329803	0.071268	-0.065143	-0.296846	0.223412
13336309	AT1G05880	4.19315	4.42239	4.47819	4.0469	4.20413	4.41686	4.01779	4.46157	3.85586	4.40126	4.53929	5.4708	7.55626	6.35276	5.63388	6.13816	5.84123	7.28702	8.26211	7.20991	5.53282	6.66444	6.79191	7.69834	3.36311	1.93037	1.15569	2.09126	1.6371	2.87017	-0.175361	0.039187	-0.622328	0.35436	0.335153	1.05395	0.705846	0.857152	-0.101069	0.526284	0.950678	0.411317	0.881207	0.817965	0.521259	0.171924	0.615525	-0.642629
13336439	AT1G06135	5.1493	4.44344	4.04276	4.81669	4.46574	3.95985	5.18722	5.10956	4.12481	4.45253	4.42322	4.80229	5.75486	5.32977	4.86386	4.87591	5.41945	4.86974	6.80648	5.23999	5.06206	6.35446	5.34763	5.45434	0.60556	0.88633	0.821102	0.059221	0.953706	0.909888	0.037912	0.666122	0.082052	-0.364156	-0.042517	0.842439	1.05161	-0.089777	0.198196	1.47855	-0.071813	0.58461	1.0137	-0.755899	0.116144	1.84271	-0.029296	-0.257829
13336445	AT1G06160	7.9381	7.56186	6.82502	6.77582	6.69087	5.68054	7.95798	8.32661	7.92234	7.23011	6.742	5.0045	7.11352	6.42426	5.96445	5.61087	6.02674	4.86297	7.91029	7.71681	7.28886	7.3005	6.17658	5.29353	-0.824579	-1.13761	-0.860572	-1.16495	-0.664126	-0.817568	0.019884	0.764743	1.09733	0.45429	0.051129	-0.676033	0.796773	1.29256	1.32441	1.68963	0.149833	0.430561	0.776889	0.527815	0.227084	1.23534	0.098704	1.10659
13337007	AT1G07560	3.88178	3.42797	3.2394	3.00061	3.02515	3.00229	3.40452	3.37057	3.13781	2.68844	3.17959	3.11662	3.07004	3.51105	3.45874	3.49066	3.15744	3.3214	3.79835	3.64048	2.97928	3.40395	3.05049	3.27493	-0.811738	0.083083	0.219336	0.490053	0.13229	0.319108	-0.477256	-0.057402	-0.101598	-0.312172	0.154448	0.114327	0.728313	0.129428	-0.479463	-0.086706	-0.10695	-0.046464	1.20557	0.18683	-0.377865	0.225466	-0.261398	-0.160791
13337220	AT1G08090	4.08979	4.0165	3.90717	4.24417	3.66976	3.51326	3.70882	3.97385	3.64907	4.03134	3.76763	3.74418	4.69648	3.9921	4.21786	4.2982	3.69396	3.99001	3.97871	4.05114	4.19349	4.64617	3.90853	3.88413	0.606692	-0.024397	0.310691	0.054028	0.024206	0.476744	-0.380964	-0.042652	-0.258102	-0.212828	0.097869	0.230916	-0.71777	0.059039	-0.024377	0.347976	0.214567	-0.105881	-0.336806	0.101691	0.233725	0.560804	0.116698	-0.336797
13337815	AT1G09050	6.15946	5.91654	6.08433	6.02505	6.20083	6.25796	6.39464	6.08433	6.70185	5.68302	6.05742	5.55321	5.15495	6.55178	6.29681	5.50962	5.91022	5.9616	5.79692	6.4279	6.10965	5.70313	6.08433	6.19097	-1.00451	0.635234	0.212483	-0.515437	-0.290607	-0.296352	0.235178	0.167787	0.617521	-0.342031	-0.143412	-0.704749	0.641972	-0.123878	-0.187158	0.193511	0.174104	0.229364	0.406794	-0.291665	-0.804679	0.535542	0.317516	0.934113
13337852	AT1G09180	3.64336	3.5636	3.48328	3.92259	5.58115	5.10581	3.68333	4.14067	3.36935	4.33763	5.84746	6.23139	4.3134	4.11363	3.46779	4.29861	5.62418	4.32537	3.56054	3.93384	4.08648	3.63516	5.72269	4.98421	0.670048	0.550032	-0.015497	0.376013	0.043031	-0.780446	0.039979	0.577069	-0.113933	0.415034	0.26631	1.12558	-0.752863	-0.179788	0.618695	-0.663448	0.098507	0.658841	-0.792842	-0.756857	0.732628	-1.07848	-0.167803	-0.466741
13338322	AT1G10385	4.16311	4.18314	4.17703	4.51745	4.16972	4.27935	4.20996	3.98712	3.84607	3.90088	3.90275	4.16972	5.01983	4.33273	4.92029	4.16972	4.10909	4.13565	4.19012	3.9895	4.02896	4.13535	4.67814	4.087	0.856719	0.149593	0.743261	-0.347721	-0.060639	-0.143702	0.046853	-0.196023	-0.330959	-0.616563	-0.266969	-0.109629	-0.829705	-0.343234	-0.891324	-0.034371	0.569053	-0.048653	-0.876558	-0.147211	-0.560365	0.582192	0.836022	0.060976
13338554	AT1G10745	3.49884	3.39212	3.58364	3.60413	3.16861	3.46926	3.92981	3.49292	3.42607	3.58364	4.19144	3.54942	3.58364	3.73203	3.64685	3.64906	3.52138	3.55177	4.34799	4.13996	3.59191	3.66096	3.40785	3.76588	0.084798	0.339905	0.063218	0.044928	0.352766	0.082509	0.430974	0.100795	-0.157561	-0.0205	1.02283	0.080156	0.764359	0.407936	-0.054947	0.011899	-0.113524	0.214108	0.333385	0.307141	0.102614	0.032399	-1.13635	0.133952
13338845	AT1G11520	4.05299	3.5436	3.63635	3.64523	3.4987	3.29627	3.57137	3.82259	3.45509	3.3242	3.58357	3.82363	4.64588	4.07884	3.9461	3.6424	3.76542	3.84324	3.94843	4.0104	3.66734	3.95614	3.51574	4.34043	0.592891	0.535236	0.309747	-0.002829	0.266719	0.546977	-0.481627	0.278988	-0.181267	-0.321026	0.084872	0.527361	-0.697456	-0.068433	-0.278765	0.313744	-0.249675	0.49719	-0.215829	-0.347421	-0.097498	0.63477	-0.334547	-0.030171
13338872	AT1G11590	3.01494	3.0987	3.22417	2.89768	2.78551	2.59604	3.22828	3.60509	3.30669	3.19578	3.04282	2.94339	3.97904	4.60597	5.1849	5.04918	4.27993	4.30277	4.94825	4.92688	4.69164	4.09609	5.31822	4.41499	0.964095	1.50727	1.96072	2.15151	1.49442	1.70673	0.213334	0.50639	0.082515	0.298102	0.257312	0.347354	0.969213	0.320908	-0.493254	-0.953096	1.0383	0.112225	0.755879	-0.185482	-0.575769	-1.2512	0.780988	-0.235129
13339075	AT1G11980	4.66243	5.12531	4.92363	4.75768	4.88206	5.25192	4.34364	5.61229	4.53929	4.56397	3.75149	5.65356	3.89254	4.39671	4.80259	4.60026	5.10698	4.30166	5.24382	4.52746	4.51541	3.41356	4.44686	4.33915	-0.769891	-0.728602	-0.121034	-0.157419	0.224915	-0.950261	-0.318789	0.48698	-0.38434	-0.19371	-1.13057	0.401637	1.35128	0.130754	-0.28718	-1.1867	-0.660119	0.037495	1.67007	-0.356226	0.09716	-0.992992	0.470448	-0.364142
13339088	AT1G12040	3.36092	3.74666	3.70227	3.80477	3.82287	4.6418	3.75175	4.47701	3.38635	3.45328	3.43308	3.51021	3.68073	4.28635	3.70631	3.72864	3.36531	3.70708	4.48683	3.28023	3.33013	3.9016	3.3253	3.79109	0.319807	0.539689	0.004036	-0.076128	-0.45756	-0.934727	0.390833	0.730358	-0.315921	-0.351486	-0.389787	-1.1316	0.806104	-1.00612	-0.376184	0.172956	-0.040007	0.084015	0.415271	-1.73648	-0.060263	0.524442	0.34978	1.21561
13339375	AT1G12663	2.8858	3.36502	3.02487	3.65992	3.58084	3.33082	2.81673	2.68784	2.69304	2.86571	3.15592	2.74031	3.74254	3.37257	2.72491	3.11444	3.30907	2.91444	3.06257	3.40219	3.12508	3.36842	2.98782	2.94996	0.856737	0.007552	-0.299959	-0.545479	-0.271769	-0.416381	-0.069072	-0.677184	-0.331834	-0.794213	-0.424922	-0.590511	-0.679968	0.029618	0.400171	0.253972	-0.321252	0.035519	-0.610896	0.706802	0.732005	1.04818	0.10367	0.62603
13339639	AT1G13330	3.89555	3.83986	3.17564	3.35851	3.29541	3.79019	3.50021	4.0189	3.62528	3.56358	3.62392	3.69457	4.63107	4.33788	4.58981	4.75897	3.51263	4.26332	3.4259	3.85203	4.22174	5.08011	3.77419	4.2297	0.735516	0.498017	1.41417	1.40046	0.217229	0.473125	-0.395341	0.179037	0.449644	0.205067	0.328514	-0.095622	-1.20517	-0.485853	-0.368069	0.321147	0.261558	-0.033616	-0.809831	-0.66489	-0.817713	0.11608	-0.066956	0.062006
13339689	AT1G13608	2.95575	3.47219	3.55752	5.14726	4.91633	3.07074	2.76826	3.99318	3.34794	3.6394	2.98882	3.07202	4.3313	2.78636	3.36762	3.26791	2.98099	3.33611	3.62924	3.07147	3.68527	3.3888	3.17586	3.33611	1.37556	-0.68583	-0.189903	-1.87935	-1.93534	0.265364	-0.187491	0.520987	-0.209584	-1.50787	-1.92752	0.001275	-0.70206	0.285108	0.317651	0.120886	0.194862	0	-0.514569	-0.235879	0.527235	1.62875	2.12238	-0.001275
13339897	AT1G14040	4.77566	5.61123	5.54822	5.93309	4.68278	4.90364	4.62969	5.51325	5.87867	5.32602	5.21781	5.25168	4.23081	5.20572	5.93964	5.12405	4.52759	5.17974	4.89836	5.18759	4.74813	5.42176	4.70493	4.87273	-0.544856	-0.405511	0.391421	-0.80904	-0.155193	0.276106	-0.145976	-0.097986	0.330445	-0.607071	0.535024	0.348045	0.667557	-0.018127	-1.19151	0.29771	0.177338	-0.307013	0.813533	0.079859	-1.52196	0.904781	-0.357686	-0.655058
13340051	AT1G14390	5.61989	6.17202	6.14506	6.74123	6.39111	5.68173	5.52262	6.03645	5.92086	6.14845	6.06291	5.95879	6.64119	6.90884	6.61195	6.63562	6.49295	6.02425	5.78506	6.15245	6.26951	6.3603	6.47427	6.20561	1.0213	0.73682	0.466884	-0.105609	0.101839	0.342522	-0.097275	-0.135571	-0.224206	-0.592778	-0.328194	0.277056	-0.85613	-0.756385	-0.342439	-0.275324	-0.018676	0.181352	-0.758855	-0.620814	-0.118233	0.317454	0.309518	-0.095704
13340142	AT1G14680	6.27713	6.35889	6.45684	7.16465	5.80246	6.3562	6.64012	7.13632	6.48925	6.95372	5.86956	5.83878	6.79041	6.86436	6.97296	7.1257	6.07215	6.13812	5.94765	6.56308	6.72013	6.9257	6.43613	6.33664	0.513277	0.505474	0.516123	-0.038955	0.269687	-0.218079	0.362986	0.77743	0.032412	-0.210935	0.067094	-0.517424	-0.842762	-0.301287	-0.252832	-0.200002	0.363974	0.19852	-1.20575	-1.07872	-0.285244	0.010933	0.29688	0.715944
13340207	AT1G15010	7.59598	6.98839	6.76227	6.48779	5.96013	4.66525	7.85788	7.37057	5.76541	6.20621	5.30672	5.37262	7.17106	6.84796	6.17614	5.95469	5.58514	5.80917	8.02749	7.0636	5.89335	6.89096	5.91667	5.42184	-0.424914	-0.140436	-0.586123	-0.533096	-0.37499	1.14392	0.261899	0.382179	-0.996855	-0.281583	-0.653403	0.707371	0.856421	0.215638	-0.282796	0.93627	0.331533	-0.387328	0.594522	-0.166541	0.714059	1.21785	0.984936	-1.0947
13340222	AT1G15045	2.81633	3.11802	3.06591	2.90124	2.78187	3.7018	2.92605	2.81633	3.13529	3.10992	3.17329	3.18175	3.04718	2.64993	3.3648	2.89932	3.62697	3.13529	3.90525	3.25282	3.05362	3.35846	3.53481	3.39188	0.230843	-0.468089	0.298881	-0.001926	0.845102	-0.566513	0.109714	-0.30169	0.069372	0.208682	0.391419	-0.520045	0.858079	0.602882	-0.311174	0.459148	-0.092162	0.256591	0.748365	0.904572	-0.380546	0.250466	-0.483581	0.776636
13340224	AT1G15080	6.46803	6.02112	6.24154	7.65366	6.35036	6.61501	6.22114	6.19745	5.64875	7.06313	6.19566	5.60072	5.30028	5.40844	5.95542	6.2088	5.8425	5.95247	6.31708	4.68238	5.64056	5.81109	6.203	6.09376	-1.16775	-0.612685	-0.286125	-1.44486	-0.507859	-0.662538	-0.246894	0.176328	-0.592798	-0.59053	-0.154707	-1.01429	1.0168	-0.726062	-0.314857	-0.39771	0.360499	0.141294	1.2637	-0.90239	0.277941	0.19282	0.515206	1.15558
13340335	AT1G15260	8.93097	8.91831	9.11142	9.6123	9.47699	9.38659	8.73711	8.84694	9.07207	9.5396	9.17752	9.00502	8.93532	8.06052	9.26031	9.27842	9.45892	8.69842	8.22201	8.81997	9.28576	9.32399	9.03883	8.61749	0.004348	-0.857789	0.148888	-0.333884	-0.018074	-0.688172	-0.19386	-0.071371	-0.039351	-0.072701	-0.299473	-0.381572	-0.713313	0.759456	0.025445	0.045578	-0.420086	-0.080938	-0.519453	0.830827	0.064796	0.118279	-0.120613	0.300634
13340367	AT1G15380	6.12436	6.34318	5.85725	5.17796	6.89197	4.95729	6.42273	6.83523	6.42892	5.56583	5.87954	6.92314	5.57008	5.79159	6.1577	5.18794	6.87787	5.62819	6.37553	6.49467	6.30079	5.84707	5.43505	6.33928	-0.554276	-0.551596	0.300447	0.009976	-0.014095	0.670899	0.298375	0.492054	0.571669	0.387863	-1.01242	1.96585	0.805451	0.703086	0.143092	0.659128	-1.44282	0.711089	0.507076	0.211032	-0.428577	0.271265	-0.430398	-1.25476
13340571	AT1G15890	6.13283	5.73863	6.12538	5.95695	5.74928	5.95277	5.97183	6.04441	5.80778	6.38851	5.79398	5.78664	3.63525	3.06453	3.06035	3.4097	2.78512	2.69411	2.9752	3.4728	3.30226	3.12743	2.76244	2.96769	-2.49758	-2.6741	-3.06504	-2.54725	-2.96415	-3.25866	-0.161004	0.305782	-0.317602	0.431566	0.0447	-0.166132	-0.660051	0.408269	0.241914	-0.282272	-0.02268	0.273581	-0.499047	0.102487	0.559516	-0.713838	-0.06738	0.439713
13340652	AT1G16025	5.7159	5.94482	5.54911	6.23851	6.10018	5.84523	5.62089	5.67604	5.10634	6.12953	5.39669	5.62758	5.44859	5.60626	5.7409	5.81831	5.7054	5.64173	6.26279	5.49639	5.7194	5.82971	5.74828	5.38819	-0.267313	-0.33856	0.191789	-0.420196	-0.394782	-0.203496	-0.095016	-0.268772	-0.442768	-0.10898	-0.703498	-0.217652	0.814204	-0.109864	-0.021502	0.011399	0.04288	-0.253543	0.90922	0.158908	0.421266	0.120379	0.746378	-0.035891
13340684	AT1G16090	7.95896	7.22938	7.5003	8.38296	7.88902	7.65656	8.45583	7.73248	8.00211	8.78307	7.62678	7.90111	8.59938	7.65624	7.77885	8.73363	7.96007	8.42705	9.23217	8.6122	8.38969	9.01804	8.17781	8.41052	0.640416	0.426857	0.278553	0.350676	0.071049	0.770486	0.496871	0.503103	0.501811	0.400108	-0.262244	0.244548	0.632788	0.95596	0.610841	0.284407	0.21774	-0.016531	0.135917	0.452857	0.10903	-0.115701	0.479984	-0.261079
13340705	AT1G16150	4.56997	4.90451	4.41432	5.08688	4.77656	4.96373	4.88013	5.53997	5.62957	4.5081	4.90358	4.04573	6.36919	7.22088	7.80828	7.28974	8.02813	7.2915	7.84872	7.68074	7.6065	7.54971	7.93095	7.58184	1.79922	2.31637	3.39396	2.20286	3.25157	2.32777	0.310161	0.635466	1.21525	-0.57878	0.127025	-0.917995	1.47953	0.459864	-0.201781	0.259971	-0.097184	0.290343	1.16936	-0.175602	-1.41703	0.838751	-0.224209	1.20834
13340802	AT1G16400	4.83151	4.85754	5.2078	5.7533	6.37698	6.4656	4.57871	5.32573	5.95356	5.92365	6.77035	6.65704	5.45594	6.5894	6.33312	6.57192	7.49487	7.09178	6.12745	6.73061	6.70787	6.93538	7.39444	7.18118	0.624436	1.73186	1.12532	0.818618	1.11789	0.62618	-0.252801	0.468193	0.745764	0.170348	0.393366	0.191437	0.671502	0.14121	0.37475	0.363462	-0.100434	0.089401	0.924303	-0.326983	-0.371014	0.193114	-0.4938	-0.102036
13341265	AT1G17235	4.4075	4.20754	3.78777	4.22704	4.43713	4.00034	4.22677	4.20697	4.11151	4.21605	3.84362	4.03916	5.16843	4.31489	4.24646	3.95803	4.09333	4.14789	4.40778	4.55743	4.32992	3.96252	3.9543	4.24773	0.760923	0.107352	0.458691	-0.269015	-0.343802	0.147557	-0.18074	-0.000562	0.323738	-0.01099	-0.59351	0.038829	-0.760649	0.242541	0.083457	0.004496	-0.139029	0.099842	-0.579909	0.243103	-0.240281	0.015486	0.454481	0.061013
13341621	AT1G18090	6.61411	7.09492	7.30962	7.54442	7.14362	7.39359	6.73126	6.91225	7.19634	7.3381	7.30351	6.36208	7.21107	7.23271	7.30516	7.49263	7.22272	7.35331	6.54956	6.79643	7.15866	7.38214	7.16369	6.98057	0.596959	0.137785	-0.004458	-0.051789	0.079108	-0.04028	0.117158	-0.182674	-0.113277	-0.206322	0.159889	-1.03151	-0.661502	-0.436281	-0.146506	-0.110487	-0.059039	-0.372739	-0.77866	-0.253607	-0.033229	0.095835	-0.218928	0.658767
13342019	ATH-MIR83	2.25801	2.12342	2.21674	2.18301	2.2476	2.04704	2.02373	2.11866	2.04825	2.227	2.18301	2.01282	2.46396	2.59363	2.3926	2.58487	2.22772	2.08434	2.23051	2.51431	2.19893	2.02204	2.18084	2.08434	0.205952	0.470211	0.175865	0.401864	-0.019884	0.037308	-0.234283	-0.00476	-0.16849	0.043992	-0.064593	-0.034213	-0.233452	-0.079318	-0.19367	-0.562835	-0.046883	0	0.000831	-0.074558	-0.02518	-0.606827	0.01771	0.034213
13342060	AT1G19020	6.81374	5.16415	5.31554	5.16299	4.75513	3.86387	6.99519	5.72095	5.97931	5.74396	5.4691	5.89513	7.69096	5.98765	5.68686	6.09365	5.9421	5.98217	8.33544	7.23117	6.39677	6.9044	6.30581	6.79108	0.877222	0.823505	0.371322	0.930664	1.18697	2.1183	0.181449	0.556802	0.663772	0.580977	0.713964	2.03126	0.644481	1.24352	0.709907	0.810744	0.363713	0.808907	0.463032	0.68672	0.046135	0.229767	-0.350251	-1.22235
13342173	AT1G19190	5.78678	5.0996	5.34418	5.19679	5.4176	5.43395	5.81563	5.54664	5.554	5.31738	5.47082	5.68317	5.91814	6.26082	5.44061	5.87664	6.18077	6.19812	6.77433	6.62779	5.61706	6.25096	6.25139	6.54412	0.131359	1.16121	0.096423	0.679849	0.763163	0.764171	0.028845	0.447031	0.209817	0.120582	0.05322	0.249225	0.856185	0.366974	0.176453	0.374313	0.070625	0.345996	0.82734	-0.080057	-0.033364	0.253731	0.017405	0.096771
13342700	AT1G20710	4.532	4.14067	4.11471	4.34024	3.89147	4.53397	3.96453	4.99768	3.3742	4.07235	3.55148	3.82249	3.88208	3.91736	4.10683	3.86599	4.04403	3.89147	4.51976	3.74097	3.21901	3.1308	4.49888	3.88208	-0.649914	-0.223307	-0.007875	-0.474249	0.152553	-0.642495	-0.567472	0.857009	-0.740503	-0.267886	-0.339993	-0.711474	0.637673	-0.176397	-0.887819	-0.735194	0.454849	-0.00939	1.20514	-1.03341	-0.147316	-0.467308	0.794842	0.702084
13342906	AT1G21240	5.80062	5.88045	5.27451	5.1679	5.30395	5.62314	6.15935	6.15238	7.00734	6.17114	6.99147	8.06857	8.38427	8.13732	8.23193	7.98897	7.73521	8.28414	9.20867	8.80592	8.72117	8.26481	8.50251	9.24611	2.58366	2.25687	2.95743	2.82107	2.43126	2.661	0.358738	0.271932	1.73284	1.00323	1.68752	2.44543	0.8244	0.668598	0.489237	0.275838	0.767302	0.961977	0.465662	0.396666	-1.2436	-0.727396	-0.920215	-1.48345
13343334	AT1G22275	6.52175	6.02131	5.90839	6.95523	5.7112	5.90814	6.23407	5.41856	5.62082	6.63429	6.85137	5.30854	7.57282	6.48415	6.56627	7.34136	6.68006	6.76751	6.63996	6.95231	7.17373	7.37512	6.67178	6.84007	1.05107	0.462843	0.657878	0.386128	0.968858	0.859371	-0.287676	-0.602749	-0.287566	-0.320941	1.14016	-0.599595	-0.932856	0.468155	0.607463	0.033769	-0.008279	0.072561	-0.64518	1.0709	0.895029	0.35471	-1.14844	0.672156
13343440	AT1G22651	4.27908	5.33556	4.52586	4.99772	4.31433	5.1272	4.7679	4.77077	3.90153	4.15124	4.6768	4.53751	4.40951	5.11783	5.87937	4.93816	5.31694	5.51982	5.55741	5.09811	4.75614	4.77077	4.90806	5.39166	0.130428	-0.217728	1.35351	-0.059558	1.00261	0.392615	0.488812	-0.564788	-0.624331	-0.846478	0.362474	-0.589688	1.1479	-0.019723	-1.12323	-0.16739	-0.408881	-0.128156	0.659092	0.545065	-0.498899	0.679088	-0.771355	0.461532
13343614	AT1G22890	9.96065	9.51268	9.63591	8.97366	9.38654	8.12521	10.1124	9.58718	9.90159	9.1693	8.80951	8.27624	9.79313	9.76442	9.74738	9.33108	9.44112	8.9925	10.4637	10.1886	9.3869	9.31933	9.46938	8.99052	-0.167522	0.251745	0.111478	0.357425	0.054581	0.867293	0.151719	0.074501	0.265684	0.195641	-0.57703	0.151037	0.670581	0.424205	-0.360488	-0.011748	0.028256	-0.001979	0.518862	0.349704	-0.626172	-0.207389	0.605286	-0.153016
13343896	AT1G23724	3.69049	3.39139	3.40686	3.529	3.38229	3.73048	3.61887	4.07151	3.42762	3.29803	3.69546	3.69847	4.23135	4.87777	3.46836	4.19098	3.1283	3.9034	4.93609	3.41663	3.15824	3.62186	3.41166	3.90792	0.540865	1.48638	0.061494	0.661975	-0.253988	0.172926	-0.071614	0.680125	0.020755	-0.230971	0.31317	-0.032011	0.704737	-1.46114	-0.310121	-0.569116	0.283354	0.004519	0.776351	-2.14127	-0.330876	-0.338145	-0.029816	0.03653
13343919	AT1G23790	4.71812	4.14752	4.53434	4.46921	4.20367	4.61693	4.61158	4.47366	4.4101	4.22591	4.26031	4.1841	5.44553	4.84092	4.60942	4.91181	4.81378	5.22946	4.54167	4.61158	4.97846	4.7702	4.84654	4.96528	0.72741	0.693401	0.075083	0.442601	0.610116	0.612525	-0.10654	0.326146	-0.124237	-0.2433	0.056647	-0.432832	-0.903868	-0.229335	0.369042	-0.141605	0.032756	-0.264177	-0.797328	-0.555481	0.493279	0.101695	-0.023891	0.168655
13343979	AT1G23935	5.79894	5.34603	5.55784	5.10691	5.64131	5.65041	5.55657	5.14295	5.37095	4.63234	5.55459	4.32602	4.3313	3.5681	3.56543	3.58055	3.21523	3.59952	3.45514	3.59888	3.43074	3.34663	3.23463	3.63906	-1.46763	-1.77794	-1.99241	-1.52636	-2.42608	-2.05088	-0.242362	-0.203081	-0.18689	-0.474572	-0.086718	-1.32439	-0.876167	0.030784	-0.134687	-0.233919	0.019402	0.039537	-0.633805	0.233865	0.052203	0.240653	0.10612	1.36393
13344026	AT1G24090	6.05841	5.78214	5.95668	5.76673	5.52305	5.37814	5.58784	5.56569	5.87867	6.41484	5.92045	5.8204	6.29971	6.28453	5.96664	6.00484	5.96173	6.77156	5.48434	6.13125	6.0232	5.98547	6.22342	6.81841	0.241296	0.502388	0.009958	0.238108	0.438681	1.39342	-0.470573	-0.216452	-0.07801	0.648115	0.397404	0.442254	-0.815364	-0.153277	0.056561	-0.019371	0.261695	0.046846	-0.344791	0.063175	0.134571	-0.667486	-0.135709	-0.395408
13344037	AT1G24095	5.38134	5.65871	5.51996	5.14196	5.12905	5.47927	5.23848	5.72909	5.18399	5.32077	5.93645	5.67632	5.85133	5.48524	5.70092	5.20679	5.85724	5.71913	6.65259	6.67698	5.8511	5.95735	5.88753	6.085	0.46999	-0.173467	0.180965	0.064839	0.728186	0.239865	-0.142857	0.070387	-0.335968	0.178812	0.807397	0.197053	0.801262	1.19174	0.15018	0.750554	0.030287	0.365874	0.944119	1.12136	0.486148	0.571742	-0.77711	0.168821
13344066	AT1G24159	3.79779	3.5449	3.96506	3.65571	3.40776	3.35057	4.11344	3.65571	4.01441	3.75554	3.54996	3.54779	4.31911	4.16733	3.61475	4.27802	3.69497	3.87624	3.37252	3.7897	3.69497	3.5673	3.62621	3.56599	0.521315	0.622429	-0.350304	0.622307	0.287204	0.525674	0.315649	0.110812	0.049347	0.099824	0.142202	0.197215	-0.946591	-0.377629	0.080213	-0.710726	-0.068762	-0.310255	-1.26224	-0.488441	0.030866	-0.81055	-0.210964	-0.50747
13344381	AT1G25141	6.6718	7.2525	6.68973	8.06522	7.02804	7.45129	6.33737	6.84014	5.70623	7.98966	7.21806	7.80574	3.06972	4.39835	2.98533	3.88877	3.55268	3.32258	3.75841	3.55261	3.78751	3.90145	3.44694	3.88389	-3.60208	-2.85414	-3.7044	-4.17645	-3.47535	-4.12872	-0.334431	-0.412353	-0.983497	-0.075556	0.190018	0.354444	0.688689	-0.84574	0.802187	0.012679	-0.105743	0.561311	1.02312	-0.433387	1.78568	0.088235	-0.295761	0.206867
13344418	AT1G25250	4.92419	5.5404	5.6049	6.12933	4.94056	5.88704	4.55983	5.35179	5.44894	5.58755	5.23154	5.14999	5.51422	5.33131	5.7424	6.07635	5.43226	5.61774	4.65884	4.96369	6.15152	6.01733	5.36699	5.5059	0.590023	-0.209092	0.137496	-0.052978	0.491708	-0.269302	-0.364358	-0.188615	-0.155964	-0.541782	0.290979	-0.737054	-0.855376	-0.367626	0.409119	-0.059028	-0.065272	-0.11184	-0.491018	-0.179011	0.565083	0.482754	-0.356251	0.625214
13344610	AT1G26290	6.48407	5.93684	5.88242	6.1002	6.32154	6.37723	6.07769	6.39818	5.86599	5.80608	6.27306	6.28072	6.7926	6.54219	6.3629	6.4116	6.30833	6.06027	6.13249	6.35495	6.3043	5.95363	6.43609	6.6238	0.308528	0.605346	0.480481	0.311405	-0.013204	-0.31696	-0.406387	0.461342	-0.016432	-0.294117	-0.048482	-0.09651	-0.660108	-0.187237	-0.058602	-0.457975	0.127757	0.56353	-0.253721	-0.648579	-0.04217	-0.163858	0.176239	0.66004
13344830	AT1G26795	3.10442	3.55146	4.4695	3.19803	3.10981	3.09082	3.34517	3.93604	2.99205	3.01836	3.57444	3.37234	3.97261	3.10519	3.42683	3.64091	3.16497	2.69685	2.79662	2.83716	3.56202	3.14971	3.49799	3.38604	0.868193	-0.446279	-1.04267	0.442876	0.055159	-0.393965	0.240751	0.384578	-1.47745	-0.179675	0.464636	0.281526	-1.17599	-0.26803	0.135198	-0.491194	0.333022	0.689187	-1.41674	-0.652608	1.61265	-0.311519	-0.131614	0.407661
13344989	AT1G27130	6.7314	6.39567	6.81888	6.68039	7.16024	6.61906	6.76251	6.7017	7.01299	6.91949	6.84213	6.1499	6.08751	5.83055	5.63474	5.79207	6.15712	5.95269	6.82532	6.08532	5.62385	6.14614	6.3734	5.4893	-0.64389	-0.565123	-1.18413	-0.888313	-1.00312	-0.66637	0.031106	0.306033	0.194112	0.2391	-0.318114	-0.46916	0.737811	0.25477	-0.010895	0.354062	0.216277	-0.463394	0.706705	-0.051263	-0.205007	0.114962	0.534391	0.005766
13345051	AT1G27260	3.71896	3.97679	3.67537	3.92587	4.48656	4.53122	4.24507	3.87932	3.85737	3.666	4.02549	4.02549	4.80055	5.82848	4.3484	4.48412	3.99926	4.01088	4.07459	4.02549	4.32867	4.02549	4.27088	3.83412	1.08159	1.8517	0.67303	0.55825	-0.487297	-0.52034	0.526105	-0.09747	0.181994	-0.259876	-0.461074	-0.50573	-0.72596	-1.803	-0.01973	-0.458636	0.271622	-0.176756	-1.25206	-1.70553	-0.201724	-0.19876	0.732696	0.328974
13345090	AT1G27330	7.65317	7.6406	8.14329	6.62755	7.93595	7.73587	7.72243	7.90177	8.50347	6.90505	8.0287	8.87018	7.71131	8.36334	7.97248	7.37262	8.14096	8.42409	8.4296	8.37287	8.03507	7.29387	8.58272	8.1587	0.058142	0.722738	-0.170813	0.74507	0.205012	0.688223	0.06926	0.261172	0.360184	0.277506	0.092745	1.13431	0.718292	0.009536	0.06259	-0.078747	0.441753	-0.265389	0.649032	-0.251636	-0.297594	-0.356253	0.349008	-1.3997
13345173	AT1G27565	6.45242	6.5198	5.60233	6.22396	4.89777	6.06937	6.21797	5.53676	6.32072	5.83703	5.82868	5.69196	5.91508	6.50806	6.3657	5.80972	6.18087	6.65149	6.67264	6.33291	6.2738	6.23586	6.41153	6.62674	-0.537346	-0.011745	0.763368	-0.414242	1.2831	0.582119	-0.234455	-0.983047	0.718395	-0.386933	0.930918	-0.377408	0.757565	-0.175153	-0.091901	0.426139	0.230662	-0.024744	0.99202	0.807894	-0.810296	0.813072	-0.700256	0.352664
13345339	AT1G27880	4.53381	4.71003	5.28754	5.50986	5.18948	5.20023	4.70133	4.43149	4.85284	4.60254	5.42255	4.98671	5.17164	5.30914	5.48823	5.73807	5.85682	5.73542	5.80424	5.38033	5.80909	5.39396	5.75432	5.9188	0.637833	0.599114	0.200692	0.228211	0.667342	0.535182	0.167515	-0.278535	-0.434695	-0.907321	0.233069	-0.213522	0.632593	0.071192	0.320858	-0.344116	-0.102495	0.183379	0.465078	0.349727	0.755553	0.563205	-0.335564	0.396901
13345612	AT1G28460	3.25447	3.1722	3.72707	3.576	3.40032	3.65168	3.61842	4.00903	3.26236	3.00972	3.55634	3.1727	3.26498	4.15749	3.93887	3.91447	3.7231	3.38214	4.03164	3.26237	3.77584	3.4219	3.56037	3.30904	0.01051	0.98528	0.211797	0.338468	0.322782	-0.269541	0.363956	0.836827	-0.464714	-0.566286	0.156029	-0.478986	0.76666	-0.895116	-0.163033	-0.492575	-0.162726	-0.073102	0.402704	-1.73194	0.301681	0.073711	-0.318755	0.405884
13345614	AT1G28470	4.0015	3.57302	3.69842	3.69912	4.25988	3.9183	4.11672	4.14067	3.97201	3.75274	3.90762	3.97918	4.43395	3.40454	4.03158	3.92199	3.81461	4.13029	3.65101	3.65023	4.05976	3.66969	4.21657	4.00628	0.432454	-0.168479	0.333156	0.222867	-0.445271	0.211993	0.115223	0.567654	0.273593	0.053613	-0.352264	0.060884	-0.782939	0.245698	0.028186	-0.252298	0.401955	-0.124012	-0.898162	-0.321956	-0.245407	-0.305911	0.754219	-0.184896
13345721	AT1G29110	4.07179	4.21935	3.9372	4.26394	4.59997	4.2559	4.03237	4.03902	3.9487	4.8645	4.09055	4.03521	5.2657	4.46001	4.39157	5.27687	5.25973	4.90337	4.18139	4.77044	4.77111	4.50469	4.87627	4.39202	1.19391	0.240663	0.454369	1.01293	0.659754	0.647475	-0.039418	-0.180328	0.011497	0.600563	-0.509421	-0.22069	-1.08431	0.31043	0.379544	-0.772182	-0.38346	-0.511354	-1.0449	0.490758	0.368047	-1.37275	0.125961	-0.290664
13345906	AT1G29600	6.77292	7.15364	7.73299	8.32951	8.66094	8.28609	6.42669	7.10727	7.34486	8.3643	8.10098	7.66164	5.38504	5.42674	5.27639	4.95004	5.20747	5.21406	4.62003	4.15332	4.54025	5.23097	5.77502	4.77182	-1.38789	-1.7269	-2.4566	-3.37946	-3.45347	-3.07203	-0.346236	-0.046372	-0.38813	0.034789	-0.559963	-0.624451	-0.76501	-1.27342	-0.736136	0.280931	0.567542	-0.44224	-0.418774	-1.22704	-0.348006	0.246142	1.1275	0.182211
13346018	AT1G29860	2.86027	3.02715	3.27243	3.7993	3.7346	3.43459	3.10134	3.62721	3.51014	3.62883	3.74592	3.39789	3.54182	4.84234	4.04195	4.25473	4.51512	4.19422	4.38716	4.54602	4.65202	4.7886	4.33696	4.13404	0.681552	1.81519	0.769512	0.455429	0.780515	0.759633	0.241077	0.60006	0.237707	-0.170469	0.011323	-0.036696	0.845339	-0.296323	0.610076	0.533866	-0.178159	-0.060186	0.604262	-0.896383	0.372369	0.704335	-0.189482	-0.02349
13346118	AT1G30135	3.11443	2.82293	3.18435	3.11998	3.30126	2.70765	3.37394	3.28509	3.18312	4.09314	4.1991	5.18876	3.12802	3.40391	3.24107	3.29174	3.40734	3.34726	4.04106	3.52572	3.22517	4.16635	4.36564	4.84095	0.013597	0.580983	0.056725	0.171757	0.106077	0.639606	0.259519	0.46216	-0.001231	0.973159	0.897838	2.4811	0.913042	0.121807	-0.015908	0.874612	0.958299	1.49369	0.653523	-0.340353	-0.014677	-0.098547	0.060461	-0.987419
13346454	AT1G30700	5.01207	4.35614	4.45643	4.35146	4.58844	4.19892	5.1799	4.71134	5.25478	4.41258	4.41495	5.05986	5.46683	4.77903	4.5126	4.41709	4.98902	4.04446	6.10566	5.13862	5.25942	5.11061	4.3704	5.79436	0.454754	0.422889	0.056177	0.065631	0.400585	-0.154462	0.167826	0.355201	0.79835	0.061116	-0.173486	0.860939	0.638836	0.35959	0.74682	0.693514	-0.618627	1.7499	0.47101	0.004389	-0.05153	0.632398	-0.445141	0.888963
13346560	AT1G30974	1.98367	1.7957	1.94025	2.04833	2.21403	1.8243	2.0521	2.06553	1.79554	2.30285	2.19998	1.94717	2.58649	2.40359	2.05125	2.25892	1.97409	1.83326	1.73404	1.85453	2.09097	2.21409	1.8121	1.74625	0.602822	0.607881	0.111002	0.210585	-0.239936	0.008962	0.068432	0.26983	-0.144706	0.254518	-0.014049	0.122874	-0.852454	-0.549056	0.039721	-0.044828	-0.161988	-0.087005	-0.920886	-0.818886	0.184427	-0.299346	-0.147939	-0.209879
13346564	AT1G30990	4.61945	4.7711	5.25597	4.56363	4.92489	5.0898	4.36469	5.12217	4.30641	4.68651	4.96864	4.82606	5.42524	4.55547	4.70905	5.09132	5.32647	4.80411	4.48915	5.404	4.54029	5.02938	4.82911	4.96864	0.805796	-0.215635	-0.546928	0.527691	0.401573	-0.285694	-0.254754	0.351063	-0.949566	0.122874	0.043744	-0.263736	-0.936089	0.848527	-0.168755	-0.061939	-0.497353	0.164531	-0.681335	0.497464	0.780811	-0.184813	-0.541097	0.428267
13346788	AT1G31720	5.07994	4.93673	5.02379	5.04733	4.57893	5.23117	5.12245	4.70647	4.75235	4.46974	4.59307	4.44217	4.75696	3.81312	4.51507	3.74613	4.18593	4.42119	3.90418	4.67154	4.42457	4.1787	4.00054	3.95418	-0.32298	-1.12361	-0.508717	-1.3012	-0.392993	-0.809985	0.042508	-0.230256	-0.271432	-0.57759	0.014146	-0.788999	-0.852782	0.858418	-0.090493	0.432567	-0.185388	-0.467008	-0.89529	1.08867	0.180939	1.01016	-0.199534	0.321991
13347085	AT1G32385	4.24424	3.3262	4.05283	3.74943	3.7901	4.05663	4.24424	3.32291	4.43733	4.13405	4.69193	3.02027	5.06795	4.26892	4.03804	4.43893	4.07602	4.72713	3.83876	4.48899	4.24424	4.18633	4.33852	4.88058	0.823715	0.942725	-0.01479	0.689499	0.285925	0.6705	0	-0.003287	0.384501	0.384621	0.90183	-1.03636	-1.2292	0.220064	0.206198	-0.252603	0.262496	0.153453	-1.2292	0.223351	-0.178303	-0.637224	-0.639334	1.18981
13347185	AT1G32710	3.22072	2.61814	2.83695	2.69431	2.95391	3.04886	2.71333	2.95729	3.38048	2.90572	2.93565	3.04232	2.73453	3.04886	3.14439	3.24122	2.85223	3.19351	3.91577	3.56951	3.24247	3.31529	3.07522	3.03624	-0.486188	0.43072	0.30744	0.546905	-0.101678	0.144643	-0.507386	0.339143	0.54353	0.211402	-0.018259	-0.006541	1.18123	0.520652	0.098085	0.074073	0.22299	-0.157265	1.68862	0.181509	-0.445445	-0.137329	0.241249	-0.150724
13347218	AT1G32850	4.03381	3.83871	4.0268	3.86692	4.29109	3.75927	4.10704	4.14798	4.07921	3.88751	3.83876	3.98833	4.94922	4.40938	4.9613	4.54879	3.88287	4.32938	4.211	4.12575	4.53584	4.47149	4.00662	4.34456	0.915405	0.570666	0.934507	0.681871	-0.408215	0.570115	0.073229	0.309266	0.052412	0.020589	-0.452324	0.229058	-0.738215	-0.283635	-0.425465	-0.077309	0.12375	0.015172	-0.811444	-0.592901	-0.477877	-0.097898	0.576074	-0.213886
13347239	AT1G32920	9.90727	9.4604	10.2889	9.58411	8.98173	7.91604	10.0245	9.51502	9.55123	9.9799	8.37519	9.0312	8.71265	9.06924	9.48574	8.48805	7.56288	7.85249	9.74022	9.39913	7.70071	9.46323	8.24974	7.91167	-1.19462	-0.391166	-0.803195	-1.09606	-1.41885	-0.06355	0.11723	0.054615	-0.737704	0.395794	-0.606535	1.11515	1.02757	0.329897	-1.78503	0.975187	0.686861	0.059178	0.910339	0.275282	-1.04732	0.579393	1.2934	-1.05597
13347247	AT1G32940	4.20179	4.70076	4.98872	4.84065	4.52798	4.76333	4.62629	4.65388	4.8657	4.87836	5.119	6.41845	5.06951	5.56614	5.25839	5.18367	5.15603	5.5422	5.98033	6.11563	5.31341	4.96748	5.07359	6.22103	0.867718	0.86538	0.269672	0.34302	0.628057	0.778875	0.424503	-0.046878	-0.123015	0.037703	0.591026	1.65512	0.910819	0.549491	0.055023	-0.216193	-0.08244	0.678824	0.486316	0.596369	0.178038	-0.253896	-0.673466	-0.976296
13347271	AT1G32960	4.50039	3.6527	3.0477	3.20031	3.97997	3.59639	4.00214	4.60495	4.064	3.72478	4.63481	6.06501	5.62205	5.05099	4.4677	4.91832	4.53402	5.91922	7.01633	6.00038	5.68839	5.95907	6.11823	7.50168	1.12165	1.39829	1.42	1.71801	0.554048	2.32283	-0.498252	0.95225	1.0163	0.524472	0.654841	2.46861	1.39428	0.949391	1.22069	1.04075	1.58421	1.58246	1.89253	-0.002859	0.204393	0.516275	0.92937	-0.886152
13347342	AT1G33110	7.63427	6.94497	7.50793	9.17856	9.12833	8.91299	8.14276	7.12265	7.66789	9.63878	9.19926	9.29604	6.86277	6.19053	6.49031	8.45956	8.86833	8.42791	8.22444	7.15916	7.46264	9.08803	8.95404	9.04085	-0.771497	-0.754437	-1.01762	-0.719002	-0.260008	-0.485073	0.508491	0.177677	0.159958	0.46022	0.070922	0.383053	1.36167	0.968632	0.972324	0.628474	0.085716	0.612941	0.85318	0.790955	0.812366	0.168254	0.014794	0.229888
13347887	AT1G34490	3.2354	3.38822	3.33611	3.45511	3.0977	3.22765	2.84508	3.45765	3.11034	3.2354	3.20574	3.36588	4.12393	3.76129	3.71724	4.0848	3.58459	3.42006	3.18926	3.30843	3.24984	4.13054	3.48031	3.42006	0.888535	0.373077	0.381129	0.629688	0.486894	0.192404	-0.390317	0.069433	-0.225766	-0.21971	0.108043	0.138229	-0.934673	-0.452864	-0.467396	0.045743	-0.104281	0	-0.544356	-0.522297	-0.24163	0.265453	-0.212324	-0.138229
13347932	AT1G34670	4.32656	4.40654	4.03015	4.67184	4.15518	5.17974	4.79252	4.47048	4.63016	4.68012	4.07567	4.68012	5.13207	4.5835	4.79399	4.71598	4.62552	4.5997	4.41518	4.84771	4.22067	4.32391	4.80308	4.68012	0.805509	0.176965	0.763838	0.044131	0.470345	-0.580045	0.465959	0.063941	0.600003	0.008272	-0.079507	-0.499628	-0.716893	0.264203	-0.57332	-0.392063	0.177562	0.080417	-1.18285	0.200262	-1.17332	-0.400335	0.257069	0.580045
13348010	AT1G35230	6.52713	5.40234	4.06764	5.05089	5.06952	5.32694	6.86457	5.8829	5.26694	5.66436	6.60267	7.627	6.28764	5.97507	5.74299	6.00425	6.17728	6.87386	7.21705	6.54392	5.82776	6.64014	6.52081	7.59844	-0.23949	0.572728	1.67535	0.95336	1.10777	1.54692	0.337434	0.480554	1.1993	0.613471	1.53316	2.30006	0.929412	0.568852	0.084774	0.635892	0.343531	0.724581	0.591978	0.088298	-1.11453	0.022421	-1.18962	-1.57548
13348275	AT1G36240	4.02915	4.14725	4.50789	4.01587	3.77353	4.49784	3.9176	3.93126	4.06662	4.09116	3.52426	3.82423	3.98089	3.31085	3.87712	4.07103	4.28342	4.57312	3.24355	4.18253	4.36478	3.6189	3.66668	3.85562	-0.048266	-0.836399	-0.630769	0.055159	0.509885	0.075278	-0.11155	-0.215987	-0.441274	0.075292	-0.249277	-0.673612	-0.737336	0.871679	0.487655	-0.45213	-0.616741	-0.717495	-0.625786	1.08767	0.928929	-0.527422	-0.367464	-0.043883
13348317	AT1G36510	4.59092	5.34718	5.19447	5.068	4.72817	5.38975	4.41094	5.06349	4.12848	4.53589	4.35672	4.91079	3.64575	3.62387	4.26452	3.77777	4.23433	3.56547	4.31482	3.72257	3.7474	3.66365	3.78098	4.15838	-0.945172	-1.72331	-0.929947	-1.29024	-0.49384	-1.82428	-0.179986	-0.283696	-1.06599	-0.532117	-0.371455	-0.478962	0.669069	0.098702	-0.517125	-0.114119	-0.453351	0.592909	0.849055	0.382398	0.548865	0.417998	-0.081896	1.07187
13348549	AT1G42980	4.82305	4.54052	4.47638	4.96791	4.53621	4.43854	5.26779	5.43626	4.41224	5.19529	4.68668	5.54155	3.94957	3.5283	3.73877	4.29984	3.61055	3.10145	4.88009	3.65435	3.20109	4.2605	4.1671	3.73946	-0.873474	-1.01222	-0.737609	-0.668063	-0.925663	-1.3371	0.444738	0.89574	-0.064141	0.227388	0.150471	1.10301	0.930518	0.126048	-0.537683	-0.039339	0.556554	0.638011	0.48578	-0.769692	-0.473542	-0.266727	0.406083	-0.465
13348604	AT1G43160	6.81954	6.02274	5.05857	4.81458	4.81972	4.57116	6.61807	5.82908	5.15854	5.11646	6.44692	8.03133	5.22318	4.71055	4.62913	5.06003	4.94035	5.15534	6.31558	5.05081	5.52428	5.73938	5.68539	6.74172	-1.59636	-1.3122	-0.429442	0.245452	0.120635	0.584187	-0.201475	-0.193666	0.099969	0.301878	1.6272	3.46017	1.0924	0.340265	0.895147	0.679342	0.745035	1.58638	1.29387	0.533931	0.795178	0.377464	-0.882168	-1.87379
13348681	AT1G43765	2.0484	2.83803	2.68911	2.30784	1.80988	1.815	2.33293	1.91111	2.33505	1.9278	2.15897	1.98047	2.24575	2.3872	2.84944	2.7647	2.4167	1.78104	3.17702	2.61517	3.56341	2.32002	2.07508	2.24142	0.197349	-0.450831	0.160327	0.456864	0.606814	-0.033962	0.284531	-0.926928	-0.354057	-0.38004	0.349084	0.165466	0.931264	0.227968	0.713968	-0.444676	-0.341616	0.460381	0.646733	1.1549	1.06803	-0.064636	-0.6907	0.294915
13349039	AT1G45243	2.36481	2.87333	2.11057	2.13033	1.96037	2.60025	2.26902	2.67422	2.34725	2.12578	2.79116	2.64613	3.39045	3.01615	2.31119	2.33643	2.09336	2.55586	2.63676	2.53845	2.55815	2.92304	2.15959	2.68249	1.02563	0.142825	0.200614	0.206101	0.132985	-0.044393	-0.095792	-0.199104	0.236676	-0.004553	0.83079	0.045881	-0.753688	-0.477701	0.246967	0.586606	0.066232	0.126631	-0.657896	-0.278597	0.010291	0.591159	-0.764558	0.08075
13349184	AT1G47390	2.93613	2.94014	3.42732	3.0002	3.06632	2.96252	2.98265	3.39284	2.77561	3.07883	3.06288	3.34397	3.99641	3.76386	3.08671	3.12279	3.19802	3.18683	3.18268	3.03476	3.11692	3.30987	3.11895	3.5162	1.06029	0.82372	-0.340617	0.122586	0.131697	0.224308	0.046521	0.452706	-0.651714	0.078624	-0.00344	0.381449	-0.813738	-0.729098	0.030214	0.187083	-0.079067	0.329373	-0.860259	-1.1818	0.681928	0.108459	-0.075627	-0.052076
13349541	AT1G48330	8.48619	10.0486	9.95871	8.84263	8.82661	9.13036	8.69762	9.75857	9.83241	8.5741	8.30574	8.10844	8.40347	9.85699	10.132	8.93086	8.82131	9.08591	9.10545	9.8722	9.66569	8.75096	8.85089	9.09789	-0.082718	-0.191605	0.173322	0.088228	-0.005296	-0.044449	0.211425	-0.290026	-0.126296	-0.268538	-0.520866	-1.02192	0.701976	0.015204	-0.466339	-0.179901	0.029581	0.011981	0.490551	0.30523	-0.340043	0.088637	0.550447	1.0339
13349713	AT1G48698	3.01873	3.36476	3.45761	3.21205	2.58571	3.06113	2.69326	3.50554	2.76269	3.08386	2.60721	3.23719	3.13942	2.76842	3.17923	3.61041	2.87948	2.7747	2.46219	3.05389	2.81966	3.15901	3.1458	2.81724	0.120691	-0.596334	-0.278377	0.398357	0.293764	-0.28643	-0.325473	0.140785	-0.694917	-0.128197	0.021497	0.176066	-0.677231	0.285466	-0.359565	-0.451399	0.266325	0.042544	-0.351758	0.144681	0.335352	-0.323202	0.244828	-0.133522
13349857	AT1G49120	4.4794	4.39481	4.81263	4.25597	4.41685	5.12791	4.52048	4.95433	4.44502	4.56161	4.57061	4.69436	4.99205	4.56161	4.79142	4.31866	4.18082	4.40874	4.30354	4.42047	4.5056	4.32488	4.6968	4.38084	0.51265	0.166794	-0.021212	0.062692	-0.236031	-0.719169	0.041078	0.559516	-0.367609	0.305639	0.153765	-0.433548	-0.688503	-0.141134	-0.285821	0.00622	0.51598	-0.027896	-0.729581	-0.70065	0.081788	-0.299419	0.362215	0.405652
13350020	AT1G49475	5.25396	5.66504	5.72689	5.81323	5.63397	5.13746	5.52445	5.71682	5.36405	6.04255	5.24266	5.07655	6.04046	5.38821	5.70046	5.9772	5.56614	5.62634	5.32728	5.60557	5.97675	6.06036	5.58578	5.2537	0.786503	-0.276824	-0.026434	0.16397	-0.067829	0.488873	0.270492	0.051783	-0.362843	0.229321	-0.39131	-0.060912	-0.713182	0.217351	0.276294	0.083157	0.019637	-0.372637	-0.983674	0.165568	0.639137	-0.146164	0.410947	-0.311725
13350146	AT1G49870	5.19681	5.06447	5.02895	5.07461	4.78356	5.23008	5.06853	4.96913	4.53214	5.13352	5.20741	4.63454	5.63725	4.93118	4.7908	5.86076	5.49052	5.2988	4.80803	5.07444	4.70634	5.68339	4.88053	5.18236	0.440441	-0.133295	-0.238148	0.786152	0.706962	0.068716	-0.128278	-0.095343	-0.496812	0.058917	0.423852	-0.595546	-0.829225	0.143256	-0.08447	-0.177367	-0.609996	-0.116438	-0.700947	0.238599	0.412342	-0.236284	-1.03385	0.479108
13350522	AT1G50780	4.12549	4.57959	4.76793	4.2076	3.97173	4.82134	4.49827	4.53631	3.67028	3.52612	4.51038	4.47123	5.06795	4.74258	4.76151	4.29148	4.40175	4.53631	4.2412	4.67128	4.36761	4.02773	4.43199	4.58475	0.942464	0.162996	-0.006421	0.083884	0.430023	-0.285021	0.37278	-0.043272	-1.09765	-0.681472	0.53865	-0.350109	-0.826752	-0.071299	-0.393902	-0.263747	0.030243	0.048434	-1.19953	-0.028027	0.703751	0.417725	-0.508407	0.398543
13350615	AT1G51030	2.56839	2.80073	2.97374	2.19183	2.77821	3.0358	2.53405	2.74518	3.08233	2.58659	2.45012	2.74998	2.81066	2.80656	2.65044	3.3507	2.79152	2.88695	3.44066	2.92726	2.7863	2.62356	2.43922	3.3333	0.242263	0.005829	-0.323294	1.15888	0.013308	-0.148846	-0.034338	-0.055556	0.108591	0.394762	-0.32809	-0.285817	0.630008	0.120698	0.135859	-0.727142	-0.352303	0.446353	0.664346	0.176254	0.027268	-1.1219	-0.024213	0.73217
13350721	AT1G51320	2.54845	2.57532	2.93083	2.58033	2.36388	2.58245	2.76246	2.39636	2.18422	2.64384	2.78434	2.53756	3.09369	2.74721	2.86875	2.90781	3.13793	2.49639	2.31728	2.39588	3.0625	2.44654	2.76238	2.7757	0.545239	0.171891	-0.062075	0.327477	0.774053	-0.086062	0.214009	-0.178961	-0.746613	0.063503	0.420466	-0.04489	-0.776409	-0.351334	0.193743	-0.461269	-0.375547	0.279312	-0.990418	-0.172373	0.940356	-0.524772	-0.796013	0.324202
13350804	AT1G51430	7.89552	7.95212	7.98584	7.93803	7.82039	7.73225	7.79672	7.87311	7.66117	7.84762	7.40595	7.35989	3.462	3.42406	3.09014	3.43085	3.0981	2.79536	2.80243	3.17391	3.45751	3.11768	2.90467	2.61484	-4.43352	-4.52806	-4.89571	-4.50718	-4.72229	-4.93689	-0.0988	-0.079009	-0.324672	-0.090409	-0.414439	-0.372361	-0.659568	-0.250149	0.367379	-0.313173	-0.193425	-0.180522	-0.560768	-0.17114	0.692051	-0.222764	0.221014	0.191839
13351005	AT1G51760	8.36631	8.25213	8.10016	8.05183	8.34148	8.02122	8.31335	8.64897	9.03167	8.93596	9.59297	10.3698	8.98046	8.96621	8.85952	9.17721	9.06478	9.24959	9.84086	9.4994	9.47017	9.9042	10.0509	10.3878	0.614154	0.714086	0.75936	1.12538	0.723304	1.22837	-0.052951	0.39684	0.931508	0.884128	1.25149	2.34856	0.860397	0.533186	0.610654	0.72699	0.986071	1.13823	0.913348	0.136346	-0.320854	-0.157138	-0.26542	-1.21033
13351296	AT1G52530	4.21744	3.8195	3.74673	3.53139	3.69664	3.77763	3.86086	3.25815	3.55344	4.09285	3.63027	4.20937	4.38145	4.19711	3.52771	4.02298	4.00371	3.8798	3.59594	3.68621	3.77824	3.90151	3.99051	4.16175	0.164009	0.377606	-0.219021	0.491591	0.307066	0.102173	-0.356575	-0.561347	-0.193288	0.561466	-0.066374	0.43174	-0.785506	-0.510902	0.250536	-0.121464	-0.01319	0.281949	-0.428931	0.050445	0.443824	-0.68293	0.053184	-0.149791
13351419	AT1G52940	2.84399	3.60397	2.89342	2.55638	2.72206	2.5537	2.38373	2.35746	2.37234	2.85983	2.59641	3.14259	3.3458	2.72228	3.01512	3.69266	2.65373	2.4604	2.4759	3.11622	2.71853	2.07016	2.98977	2.97776	0.501808	-0.88168	0.121706	1.13628	-0.06833	-0.093296	-0.46026	-1.2465	-0.521082	0.303451	-0.125647	0.588893	-0.869899	0.393932	-0.296594	-1.6225	0.33604	0.517363	-0.409639	1.64043	0.224488	-1.92595	0.461687	-0.07153
13351515	AT1G53160	7.70352	7.94244	7.20492	6.93268	7.83632	7.25581	7.82275	7.70162	7.09892	7.21576	6.95877	6.40279	6.32658	6.03854	5.31749	5.28341	6.54212	6.0938	5.66156	5.97517	5.443	5.58038	6.13816	5.58351	-1.37694	-1.9039	-1.88742	-1.64927	-1.2942	-1.16202	0.119222	-0.240816	-0.106001	0.28308	-0.877548	-0.853025	-0.665023	-0.063364	0.125504	0.296968	-0.403965	-0.510286	-0.784245	0.177452	0.231505	0.013888	0.473583	0.342739
13351581	AT1G53270	5.2132	5.15639	4.58806	5.18055	5.07935	5.08749	5.09509	5.17708	5.16417	5.54353	5.12779	4.95543	5.62092	5.58117	5.37069	5.75649	5.60607	5.2141	6.30188	5.57212	5.73099	5.15474	5.46819	5.59845	0.407722	0.424778	0.782632	0.575938	0.526722	0.126612	-0.118108	0.020686	0.576113	0.362979	0.048443	-0.132052	0.680961	-0.009053	0.360303	-0.601744	-0.137879	0.384353	0.799069	-0.029739	-0.21581	-0.964723	-0.186322	0.516405
13351714	AT1G53543	6.08472	5.96381	5.76058	5.73223	5.9012	6.1619	5.58183	5.8555	5.65742	5.07012	6.0777	6.08962	6.66629	6.86505	6.48309	6.72665	6.164	6.47219	5.68542	5.98365	7.38467	5.94021	6.14117	6.71486	0.581573	0.901241	0.722506	0.994411	0.262803	0.310282	-0.502895	-0.108309	-0.103158	-0.662114	0.176506	-0.07229	-0.980874	-0.881407	0.901583	-0.786431	-0.022825	0.24267	-0.477979	-0.773098	1.00474	-0.124317	-0.199331	0.31496
13351765	AT1G53680	5.21781	5.40785	4.89525	5.79076	5.70302	5.73705	5.09642	5.68217	5.59831	4.84631	5.44533	5.66102	4.4361	4.85399	6.01233	5.9371	6.04757	6.10744	5.16904	5.72624	6.06759	5.32383	5.34238	6.25282	-0.781714	-0.553855	1.11708	0.146338	0.344548	0.37039	-0.121394	0.274323	0.703057	-0.944454	-0.257693	-0.076034	0.732944	0.872252	0.055258	-0.613272	-0.70519	0.145375	0.854338	0.597929	-0.647799	0.331182	-0.447497	0.221409
13351773	AT1G53708	3.809	3.76293	4.15821	4.41474	3.8329	3.83075	3.7828	3.76687	3.94736	3.94191	4.02549	4.20541	3.94313	4.04486	3.72448	3.88809	3.91553	4.36693	4.68475	4.38618	4.56566	3.89905	3.86917	4.09769	0.134128	0.281932	-0.433727	-0.526649	0.082637	0.536179	-0.026195	0.003942	-0.210849	-0.472829	0.192589	0.374663	0.741624	0.341325	0.841173	0.010956	-0.046368	-0.269236	0.767819	0.337383	1.05202	0.483785	-0.238957	-0.643899
13351793	AT1G53730	9.82602	9.91786	9.80341	9.54302	9.34365	8.81891	9.89823	9.84347	9.72461	9.29749	8.92878	8.55058	9.74458	9.8935	9.72994	9.27392	9.36853	8.49843	9.01743	9.54166	9.65838	8.86678	8.86156	8.3514	-0.081437	-0.024359	-0.073474	-0.269097	0.024882	-0.32048	0.072209	-0.074397	-0.078806	-0.245535	-0.414868	-0.268329	-0.727153	-0.351844	-0.071556	-0.407147	-0.506972	-0.147034	-0.799362	-0.277447	0.00725	-0.161612	-0.092104	0.121295
13351822	AT1G53820	2.81169	3.149	2.78904	2.91655	2.73343	2.89642	2.75714	2.79301	2.72676	2.88885	2.78181	2.85394	2.76416	2.99906	2.89054	3.30982	3.4728	3.29307	3.39932	3.1041	3.07431	2.98047	2.77672	3.03029	-0.047533	-0.149934	0.101502	0.393271	0.739364	0.396652	-0.054555	-0.355987	-0.06228	-0.027702	0.048376	-0.042472	0.63516	0.105033	0.183768	-0.329351	-0.696081	-0.262776	0.689715	0.46102	0.246048	-0.301649	-0.744457	-0.220304
13351835	AT1G53870	7.83698	8.22477	7.27949	6.56946	8.02277	8.12137	8.28926	8.35965	7.80811	6.94049	7.81805	7.52238	6.65231	6.40808	6.00542	5.6475	5.92498	6.27589	7.33709	7.04649	6.60851	5.53891	6.05077	5.67838	-1.18467	-1.81669	-1.27408	-0.921963	-2.09779	-1.84547	0.452277	0.13488	0.528618	0.371022	-0.204725	-0.598985	0.684786	0.638412	0.603092	-0.108592	0.125792	-0.597511	0.232509	0.503532	0.074474	-0.479614	0.330517	0.001474
13351856	AT1G53870	7.38468	7.77881	6.83506	6.21946	7.51163	7.63846	7.85295	7.78416	7.36369	6.51262	7.14445	7.00937	6.31133	5.94814	5.65019	5.1472	5.43267	5.53249	6.90687	6.67361	6.20695	5.04701	5.5206	5.0934	-1.07334	-1.83067	-1.18487	-1.07226	-2.07896	-2.10597	0.468268	0.00534	0.528627	0.293154	-0.36718	-0.629093	0.595532	0.725467	0.556762	-0.10019	0.087923	-0.439082	0.127264	0.720127	0.028135	-0.393344	0.455103	0.190011
13351900	AT1G53970	4.61992	5.05936	4.83917	4.70649	4.51574	4.96097	4.97762	4.758	4.58571	4.71301	4.4982	4.98286	5.53992	4.58279	4.80342	5.08851	4.44718	4.7846	4.78853	4.56251	4.78733	4.90256	4.71189	4.74497	0.92	-0.476567	-0.035751	0.382022	-0.068563	-0.176368	0.357695	-0.301366	-0.253461	0.006525	-0.017536	0.021886	-0.751395	-0.020283	-0.016093	-0.185948	0.264713	-0.039635	-1.10909	0.281083	0.237368	-0.192473	0.282249	-0.061521
13353036	AT1G56940	5.20085	5.93785	5.77725	4.69553	5.79813	6.04443	4.90702	5.44864	4.67727	4.88839	5.34384	5.51369	3.74249	4.28809	4.25507	4.59521	4.14772	4.77837	4.41702	4.4722	4.06278	4.09829	4.49994	4.2884	-1.45836	-1.64976	-1.52218	-0.100323	-1.65041	-1.26606	-0.293832	-0.489204	-1.09999	0.19286	-0.454289	-0.530738	0.674532	0.18411	-0.192293	-0.496913	0.352225	-0.489965	0.968364	0.673314	0.907696	-0.689773	0.806514	0.040773
13353186	AT1G58160	5.69977	5.4962	6.26877	7.03712	5.86595	5.5896	5.44999	5.75432	5.03374	6.81323	5.89747	5.4591	4.89752	4.24536	3.77478	4.45369	4.74065	4.68819	3.86371	3.70421	4.49374	5.13537	4.84953	4.84487	-0.802249	-1.25084	-2.49399	-2.58344	-1.1253	-0.901419	-0.249784	0.258121	-1.23502	-0.2239	0.031521	-0.130504	-1.03381	-0.541154	0.718959	0.681687	0.108886	0.156679	-0.784026	-0.799275	1.95398	0.905587	0.077365	0.287183
13353460	AT1G59590	6.66401	5.43427	5.28189	5.87585	6.39328	5.7565	7.01023	5.9301	6.01137	5.94947	6.63759	7.10014	7.16489	6.66167	6.7821	6.23763	7.39648	7.22931	7.79438	7.42756	6.73681	7.30257	7.81876	7.78179	0.500883	1.22739	1.50021	0.361785	1.0032	1.4728	0.346217	0.495827	0.729486	0.073623	0.244309	1.34363	0.629491	0.765893	-0.045293	1.06494	0.422282	0.552478	0.283274	0.270066	-0.774779	0.991316	0.177973	-0.791153
13353516	AT1G59670	2.97535	3.19402	3.13612	3.46544	2.98025	3.51628	2.98182	3.06099	3.38881	3.44783	3.98926	3.32077	4.39539	4.40384	3.81762	3.78505	3.52535	3.21749	3.66096	4.52028	4.99492	4.17949	3.52222	3.85406	1.42004	1.20982	0.681493	0.319612	0.545099	-0.298793	0.006464	-0.13303	0.252686	-0.017609	1.00901	-0.19551	-0.73443	0.116439	1.1773	0.394438	-0.003125	0.636571	-0.740894	0.249469	0.924614	0.412047	-1.01213	0.832081
13353629	AT1G59860	6.41542	5.9108	5.23783	4.42477	5.92601	5.74458	6.77588	6.05285	6.19641	4.76901	5.14695	5.23764	7.37827	6.60145	6.46772	6.09966	7.14239	6.79798	8.33929	7.14676	7.01539	7.48033	7.00596	6.05208	0.962845	0.690642	1.22988	1.67488	1.21638	1.0534	0.360453	0.14205	0.958581	0.344238	-0.779062	-0.506941	0.961024	0.545317	0.547678	1.38068	-0.136429	-0.745898	0.600571	0.403267	-0.410903	1.03644	0.642633	-0.238957
13353711	AT1G60090	2.56544	2.43069	3.0654	2.99143	2.50206	3.03292	2.73855	2.79456	2.84478	2.69773	2.62263	2.36417	2.66291	2.68474	2.615	2.80511	2.51342	2.66291	3.35138	2.69773	2.88456	3.32699	2.69773	2.70401	0.09747	0.254049	-0.450404	-0.186321	0.011364	-0.370009	0.173113	0.363869	-0.220618	-0.293702	0.120569	-0.668748	0.688472	0.012996	0.269564	0.521874	0.184309	0.041095	0.515359	-0.350873	0.490182	0.815576	0.06374	0.709843
13353727	AT1G60110	6.38601	4.88727	5.36363	5.80754	6.44721	5.8142	6.04031	5.45446	5.71656	5.4836	5.67552	5.73557	5.1702	5.66995	5.11977	4.36707	4.90375	4.67085	4.27894	4.60603	4.34579	4.71796	5.6653	4.74203	-1.21581	0.782679	-0.243866	-1.44047	-1.54347	-1.14335	-0.345699	0.56719	0.352927	-0.323936	-0.771693	-0.078638	-0.891254	-1.06392	-0.773975	0.350891	0.761555	0.071184	-0.545555	-1.63111	-1.1269	0.674827	1.53325	0.149822
13353733	AT1G60130	3.98153	4.71312	4.42024	4.12367	3.89019	4.22523	3.54799	4.97508	4.40066	4.43173	3.43077	4.57524	4.6195	4.15317	4.35165	3.87463	5.17844	4.4451	5.5475	4.53986	4.93421	4.33153	4.61093	5.21837	0.637963	-0.559956	-0.068585	-0.249039	1.28824	0.21987	-0.433539	0.261959	-0.019575	0.308067	-0.45943	0.350009	0.928003	0.386691	0.582562	0.456903	-0.567503	0.773268	1.36154	0.124732	0.602137	0.148836	-0.108073	0.423259
13353943	AT1G61120	5.41707	5.86437	6.28148	5.98384	6.35535	5.03275	5.67034	6.77993	6.73407	7.51219	9.21101	10.2522	5.15164	4.57048	5.09219	5.06371	5.05937	6.16462	6.21472	5.73319	5.95349	7.62737	7.02013	7.4141	-0.26543	-1.29389	-1.18929	-0.920135	-1.29598	1.13188	0.253272	0.915556	0.452589	1.52835	2.85567	5.21948	1.06308	1.16271	0.861304	2.56366	1.96076	1.24948	0.80981	0.247156	0.408715	1.03532	-0.894912	-3.97
13354069	AT1G61330	3.79378	4.30977	3.33292	3.28066	3.33611	3.36499	4.01398	3.77225	3.45455	4.1154	3.32163	3.66524	4.48717	3.00934	3.62023	3.71833	3.34757	3.77827	3.27207	3.53848	3.84274	3.57651	3.73536	3.48895	0.693393	-1.30043	0.287309	0.437675	0.011458	0.413287	0.220197	-0.537517	0.121629	0.834745	-0.014481	0.300248	-1.2151	0.529138	0.222515	-0.141818	0.387795	-0.289322	-1.4353	1.06665	0.100886	-0.976563	0.402276	-0.58957
13354090	AT1G61450	5.17267	4.56613	4.50308	4.72565	4.21544	4.69512	4.76891	4.67491	3.71213	4.30024	4.89947	3.46592	5.5842	4.21663	4.83148	4.10646	5.02854	4.29114	4.93135	5.14345	4.71469	4.63804	4.81102	4.17587	0.41153	-0.349501	0.328403	-0.619189	0.813099	-0.403979	-0.403763	0.10878	-0.790949	-0.425402	0.684024	-1.2292	-0.652853	0.92682	-0.116793	0.531583	-0.21752	-0.115268	-0.24909	0.81804	0.674156	0.956985	-0.901544	1.11393
13354117	AT1G61610	6.0851	6.66069	6.58055	6.18374	6.78113	7.25291	6.24109	6.44648	6.55794	6.82162	8.77739	9.55193	6.7649	6.5009	6.46422	6.2205	6.87978	7.29684	7.53332	6.4315	6.36556	6.62682	8.08439	9.60591	0.679803	-0.159788	-0.116323	0.036763	0.098649	0.043927	0.155995	-0.214211	-0.02261	0.637875	1.99625	2.29901	0.768425	-0.0694	-0.098665	0.406315	1.20461	2.30906	0.61243	0.144811	-0.076055	-0.23156	-0.791645	0.010051
13354130	AT1G61630	4.03699	4.32602	4.47445	4.02545	3.87709	4.55905	3.59228	4.6561	3.51283	3.81343	4.25812	4.739	3.6654	3.7128	3.68333	4.42594	3.81534	3.89875	4.46962	3.99316	3.90689	4.14226	3.9257	3.94814	-0.371591	-0.61322	-0.791111	0.400495	-0.061744	-0.660302	-0.444713	0.330079	-0.96161	-0.212022	0.381032	0.179951	0.804217	0.280368	0.223558	-0.283683	0.110364	0.049391	1.24893	-0.049711	1.18517	-0.071661	-0.270668	-0.13056
13354151	AT1G61700	2.81483	3.4561	3.86764	3.20913	2.96793	3.87485	3.14231	3.89609	3.17548	3.42142	3.45494	3.49584	4.19011	3.81553	3.16368	3.08213	3.15388	3.19271	3.42142	3.66811	3.78751	3.42142	3.61568	3.16368	1.37528	0.359426	-0.703961	-0.126997	0.185949	-0.682139	0.327477	0.439991	-0.692157	0.212286	0.487008	-0.379013	-0.768694	-0.147417	0.623837	0.339283	0.461805	-0.029036	-1.09617	-0.587408	1.31599	0.126997	-0.025203	0.349977
13354281	AT1G62000	4.95519	4.28648	5.07774	4.4589	4.42812	4.38685	5.08336	4.96132	4.31433	4.22409	4.26206	5.22849	5.14784	4.43883	4.68504	4.85242	4.56009	4.87321	4.07501	4.68938	4.71627	4.44728	4.73633	5.03858	0.192653	0.152346	-0.392705	0.393519	0.131966	0.486365	0.128174	0.674842	-0.763417	-0.234811	-0.166055	0.841641	-1.07283	0.250556	0.031228	-0.405146	0.176243	0.165366	-1.201	-0.424286	0.794645	-0.170335	0.342298	-0.676275
13354316	AT1G62190	4.08864	4.36558	4.42743	3.81872	4.13668	4.13138	4.05273	4.75949	3.79778	4.50801	4.12197	4.36326	3.72528	3.81164	4.08566	4.34373	5.97613	4.14947	4.44323	4.54636	3.73547	4.05426	5.10231	4.08864	-0.363357	-0.553938	-0.341764	0.525012	1.83945	0.018093	-0.035906	0.39391	-0.629648	0.689289	-0.014712	0.231879	0.717955	0.734715	-0.350192	-0.28947	-0.873821	-0.060838	0.753861	0.340805	0.279456	-0.978759	-0.859109	-0.292717
13354375	AT1G62440	5.27303	5.50923	5.29027	5.22704	4.52427	3.9071	5.49063	5.80129	4.82455	5.14232	3.80462	4.85218	5.92858	5.46082	5.59623	5.56504	5.19116	4.8183	5.23573	5.00982	4.76588	5.30226	5.08479	4.29266	0.655556	-0.048408	0.30596	0.337998	0.666888	0.911201	0.217603	0.292057	-0.465722	-0.084719	-0.719654	0.945079	-0.692851	-0.451004	-0.830351	-0.262783	-0.106376	-0.525645	-0.910454	-0.743061	-0.364629	-0.178064	0.613278	-1.47072
13354401	AT1G62560	7.42116	7.68007	8.60241	8.51965	10.1716	10.4799	7.31979	7.72845	8.54377	8.83151	10.4247	10.6741	7.26221	7.63241	7.41987	8.10187	9.0274	9.57283	6.58016	6.92009	7.62049	8.64842	8.73479	9.14921	-0.15895	-0.047664	-1.18254	-0.417778	-1.14421	-0.907104	-0.101363	0.048378	-0.058645	0.311862	0.25312	0.19418	-0.682051	-0.712324	0.200617	0.546548	-0.292612	-0.423617	-0.580688	-0.760702	0.259262	0.234686	-0.545732	-0.617797
13354426	AT1G62600	8.41074	8.24284	8.2369	8.08279	8.31328	8.30429	8.24028	8.29372	8.51155	8.50925	8.34813	8.56647	8.25299	8.84827	8.93191	8.74168	8.73288	8.51353	9.06969	8.96055	8.81646	8.7541	8.67227	8.75033	-0.157748	0.60543	0.695018	0.658887	0.419602	0.209239	-0.170457	0.050878	0.274656	0.426464	0.034855	0.262184	0.816699	0.11228	-0.115455	0.012425	-0.060608	0.236802	0.987156	0.061402	-0.390111	-0.414039	-0.095463	-0.025382
13354436	AT1G62620	6.21565	5.96168	6.51948	6.10394	6.22086	6.46981	5.73231	5.9307	5.17005	6.09751	5.95867	6.24443	5.06092	3.88406	4.57273	4.85344	4.31194	4.59616	4.39975	4.46958	5.21546	4.01803	4.08479	4.86294	-1.15473	-2.07762	-1.94675	-1.2505	-1.90892	-1.87366	-0.483341	-0.030979	-1.34943	-0.006431	-0.262191	-0.225385	-0.661166	0.585521	0.642729	-0.835413	-0.227155	0.266788	-0.177825	0.6165	1.99216	-0.828982	0.035036	0.492173
13354527	AT1G62930	6.49735	6.32593	6.71925	6.81526	6.80564	6.84683	5.95958	6.25721	6.54237	6.93506	6.42443	6.27255	4.96751	5.36959	5.21224	6.00955	5.84716	5.90348	5.70722	5.26982	5.19263	5.78064	5.41962	5.78487	-1.52984	-0.956346	-1.50701	-0.805709	-0.958483	-0.94335	-0.53777	-0.068726	-0.176881	0.119798	-0.381216	-0.574287	0.739715	-0.099767	-0.019612	-0.228914	-0.427534	-0.118614	1.27748	-0.031041	0.157269	-0.348712	-0.046318	0.455673
13354662	AT1G63280	6.00757	6.22896	6.09925	5.58224	5.80012	4.93824	5.47085	5.46545	6.16195	5.32077	5.50019	5.14178	5.46378	5.91204	6.29627	5.87857	6.02889	5.58939	6.30894	5.80269	6.6198	5.37165	5.52366	5.62941	-0.543789	-0.316925	0.197024	0.296334	0.22877	0.651156	-0.536714	-0.763513	0.062706	-0.261471	-0.299933	0.203539	0.845165	-0.109345	0.32353	-0.506926	-0.505233	0.04001	1.38188	0.654168	0.260824	-0.245455	-0.2053	-0.163529
13354783	AT1G63650	4.53082	4.40967	4.89949	5.15662	5.27907	5.30964	4.63898	4.62274	4.45013	4.95991	5.0213	4.89268	5.48513	5.2115	5.39541	5.53886	5.53542	5.56966	4.70814	5.18087	5.45615	5.36848	5.89239	5.82917	0.954316	0.801829	0.495918	0.382236	0.256344	0.260022	0.108166	0.213065	-0.449364	-0.196713	-0.257774	-0.416956	-0.776989	-0.030628	0.060739	-0.170382	0.356969	0.25951	-0.885155	-0.243693	0.510103	0.026331	0.614743	0.676466
13354944	AT1G64065	7.11472	6.84846	6.73574	7.07983	6.8996	6.67251	7.11542	6.94178	6.92313	7.4187	6.66291	6.79683	7.06528	6.72346	7.09489	7.61777	6.80056	7.33041	7.94015	7.40268	6.98852	7.8576	7.11038	7.29202	-0.049438	-0.125003	0.359143	0.537934	-0.099047	0.657908	0.000702	0.093314	0.18739	0.338872	-0.236692	0.124329	0.874868	0.679223	-0.106365	0.239834	0.309824	-0.038391	0.874166	0.585909	-0.293755	-0.099038	0.546516	-0.16272
13355059	AT1G64390	8.73061	9.61607	9.79035	9.68524	10.3486	10.7475	8.58211	9.23592	9.53833	9.51009	10.3087	10.2111	8.96246	9.25346	9.50235	9.73109	10.1717	10.4076	8.30179	8.6063	9.38039	9.59824	9.9913	9.96452	0.231847	-0.362609	-0.288002	0.045849	-0.17685	-0.33996	-0.148497	-0.380143	-0.252028	-0.175148	-0.03995	-0.53643	-0.660668	-0.647152	-0.121964	-0.132854	-0.180448	-0.443048	-0.512171	-0.267009	0.130064	0.042294	-0.140498	0.093382
13355070	AT1G64405	3.9901	3.81094	4.04449	3.86638	4.14652	4.09988	4.44481	4.15895	4.80642	4.30087	4.10739	4.26803	3.63505	4.28578	3.78069	4.2846	4.13227	4.80947	4.6171	4.86809	4.60562	4.65834	4.94897	5.27988	-0.355055	0.474848	-0.2638	0.418224	-0.01425	0.709587	0.454709	0.34802	0.761934	0.434494	-0.039129	0.168149	0.982058	0.58231	0.824932	0.373742	0.816704	0.470414	0.527349	0.23429	0.062998	-0.060752	0.855833	0.302265
13355254	AT1G64800	5.08969	6.02469	6.38478	5.51846	5.92565	6.86669	5.22477	6.65224	5.01824	5.64829	5.79025	5.82501	5.42767	4.83736	4.87433	4.73243	4.87792	4.47732	4.73735	4.03242	4.34995	4.04297	5.23693	4.14632	0.337981	-1.18733	-1.51045	-0.786035	-1.04773	-2.38937	0.13508	0.627552	-1.36654	0.129829	-0.135392	-1.04168	-0.690321	-0.804942	-0.524375	-0.689462	0.359005	-0.331007	-0.825401	-1.43249	0.842163	-0.819291	0.494397	0.710673
13355313	AT1G64950	5.27542	6.13762	6.60467	5.98373	6.35949	7.20276	5.17335	6.30125	6.9115	6.09777	6.63476	7.47851	5.60254	6.39223	6.87166	6.55339	6.57665	7.07344	6.99244	6.9887	7.14402	7.04083	7.10149	7.80849	0.327119	0.254614	0.266993	0.56966	0.217167	-0.129323	-0.102068	0.163627	0.306833	0.114036	0.275274	0.275752	1.3899	0.596468	0.272358	0.487439	0.524835	0.735047	1.49197	0.432841	-0.034475	0.373403	0.249561	0.459295
13355535	AT1G65500	6.79189	7.39973	6.5342	7.06646	7.01988	8.72983	6.96744	7.00558	7.67586	7.64361	7.37384	8.82971	5.68414	6.12794	6.20983	5.67271	6.30294	6.51556	6.4357	6.1291	5.88731	6.26887	6.21789	6.48044	-1.10775	-1.27179	-0.324375	-1.39375	-0.71694	-2.21427	0.175545	-0.394151	1.14166	0.577156	0.353955	0.099875	0.75156	0.001162	-0.322514	0.596156	-0.085053	-0.035118	0.576015	0.395313	-1.46418	0.019	-0.439008	-0.134993
13355668	AT1G66000	5.65728	5.36226	5.38377	5.05205	5.24036	5.90279	5.62219	6.08282	4.55439	5.36874	4.52203	6.19239	5.21949	6.17043	5.4914	5.11322	5.42266	6.16401	6.00842	4.85265	4.54399	5.05205	6.38202	5.90385	-0.437786	0.808165	0.107631	0.061172	0.182305	0.261223	-0.035084	0.720553	-0.829377	0.316696	-0.718325	0.289598	0.788931	-1.31777	-0.947412	-0.061172	0.959358	-0.260165	0.824015	-2.03833	-0.118035	-0.377868	1.67768	-0.549763
13355744	AT1G66250	6.74463	6.91091	7.02941	7.23754	7.48353	7.8658	6.46953	6.50055	6.95622	7.01066	7.59267	7.26971	5.65015	6.34353	5.99155	6.43009	7.00682	7.39582	6.4325	5.94298	6.26633	6.78673	6.83585	7.04491	-1.09448	-0.567378	-1.03786	-0.807458	-0.476707	-0.469982	-0.275097	-0.410359	-0.073186	-0.226881	0.109143	-0.596096	0.782345	-0.40055	0.274784	0.356645	-0.170976	-0.350914	1.05744	0.009809	0.34797	0.583526	-0.280119	0.245182
13355841	AT1G66553	3.13151	3.08291	3.12452	3.11666	3.1739	3.08068	3.09443	3.06789	3.10145	3.18507	2.91615	3.26391	4.26326	3.51353	3.25981	3.86553	3.6805	3.72122	3.60958	3.43449	3.80067	3.3451	3.19865	3.46423	1.13175	0.430621	0.135291	0.74887	0.5066	0.640539	-0.037083	-0.01502	-0.023069	0.06841	-0.257752	0.183227	-0.653678	-0.079039	0.540866	-0.520431	-0.481853	-0.256985	-0.616595	-0.064019	0.563935	-0.588841	-0.224101	-0.440212
13355862	AT1G66600	3.30532	3.21893	3.10312	3.16135	2.52673	2.48746	3.40819	3.20708	3.46874	2.9805	4.15657	3.75262	3.06635	3.653	3.29404	3.84595	3.554	3.54335	4.03685	4.04614	4.05844	3.91702	4.14273	4.07945	-0.238971	0.434074	0.190925	0.684595	1.02727	1.05588	0.102869	-0.011848	0.365621	-0.180852	1.62984	1.26516	0.970502	0.393133	0.764397	0.071072	0.588734	0.536102	0.867633	0.404981	0.398776	0.251924	-1.04111	-0.729055
13356323	AT1G67810	6.5919	5.85496	5.91196	6.64146	5.0612	5.83071	6.63527	6.96163	7.7129	7.3463	6.64632	6.39631	8.24725	7.9086	7.89231	7.98365	7.08155	7.39151	9.3602	8.81105	8.31627	8.80833	7.30408	7.80734	1.65535	2.05364	1.98036	1.3422	2.02035	1.5608	0.043371	1.10667	1.80095	0.704847	1.58512	0.565596	1.11295	0.902451	0.423955	0.824676	0.222522	0.415831	1.06958	-0.20422	-1.37699	0.119829	-1.3626	-0.149765
13356390	AT1G67920	7.00015	7.06504	6.6456	6.1045	7.03523	7.69679	7.12225	7.09018	7.46639	6.32938	7.5587	8.43093	7.137	7.87591	8.04555	7.57373	7.83503	8.21168	8.33698	8.41418	8.1068	7.69538	8.11151	8.72162	0.136848	0.810869	1.39995	1.46923	0.799799	0.51489	0.122099	0.025132	0.820787	0.224874	0.523474	0.734143	1.19998	0.538265	0.061248	0.121645	0.276486	0.509941	1.07788	0.513133	-0.759539	-0.103229	-0.246988	-0.224202
13356399	AT1G67980	4.2699	3.72229	3.42508	3.55069	2.88057	2.96394	4.16434	4.10671	4.05213	3.98374	3.89676	5.06594	5.6581	5.56411	4.86438	5.94626	5.51942	3.96219	7.06288	6.70172	5.59497	6.39699	4.36892	6.3499	1.38821	1.84182	1.4393	2.39557	2.63885	0.998259	-0.105553	0.38442	0.627055	0.433057	1.01619	2.102	1.40478	1.1376	0.730599	0.450732	-1.1505	2.3877	1.51033	0.753183	0.103544	0.017675	-2.16669	0.285701
13356664	AT1G68610	4.48869	5.33075	4.81112	4.94763	5.72555	6.28391	4.59735	5.26444	4.65952	5.22216	4.79743	5.55799	4.42094	4.16267	4.58876	4.55525	4.51059	5.10584	5.14289	4.51926	4.73849	4.44881	4.82443	4.63622	-0.067747	-1.16808	-0.222359	-0.392385	-1.21496	-1.17806	0.108664	-0.06631	-0.151606	0.274529	-0.928123	-0.725915	0.721952	0.356588	0.149728	-0.10643	0.313836	-0.469619	0.613288	0.422898	0.301334	-0.380959	1.24196	0.256296
13356666	AT1G68620	3.44141	3.03509	3.37988	3.66963	4.34226	3.9497	3.49183	3.33182	3.93599	3.79079	5.2375	7.07302	4.83405	4.67274	5.33416	5.6215	5.89139	5.97471	5.96038	5.18627	5.58668	6.01465	6.82427	7.47028	1.39264	1.63765	1.95428	1.95188	1.54913	2.02501	0.05042	0.296728	0.556106	0.121161	0.895239	3.12332	1.12633	0.51353	0.252524	0.393148	0.932876	1.49558	1.07591	0.216802	-0.303582	0.271987	0.037637	-1.62774
13357012	AT1G69500	3.27473	3.20914	3.02441	3.33737	3.17659	2.97762	3.22306	3.52864	3.57941	2.87424	3.37945	3.12287	4.11649	4.65053	3.51955	3.3981	3.67454	3.43035	3.36892	4.05001	4.83041	3.20346	3.26676	3.25727	0.841765	1.44139	0.49514	0.060722	0.497946	0.452733	-0.051671	0.3195	0.555008	-0.463135	0.202854	0.145249	-0.747573	-0.600518	1.31086	-0.194634	-0.40778	-0.173085	-0.695902	-0.920018	0.755855	0.268501	-0.610634	-0.318334
13357091	AT1G69600	3.68863	3.74498	3.43635	3.92391	3.92719	3.55078	3.93165	3.88843	3.88564	3.60978	3.7734	3.87076	4.36756	3.61786	4.16302	4.35937	4.00223	4.09517	3.60256	4.54925	4.55148	4.29269	3.99758	4.11264	0.67893	-0.12712	0.726671	0.435456	0.075038	0.544392	0.243027	0.143448	0.449289	-0.314131	-0.153787	0.319978	-0.764997	0.931396	0.388457	-0.066683	-0.004652	0.017465	-1.00802	0.787948	-0.060832	0.247448	0.149135	-0.302513
13357214	AT1G69910	7.02777	6.86267	7.02356	6.93669	7.0766	6.76645	7.14734	6.99684	6.67548	7.08402	7.0348	6.41587	5.83067	5.92645	6.09826	6.29647	6.18256	6.33815	6.51007	5.6437	6.07762	6.52068	6.13389	6.30269	-1.1971	-0.936219	-0.925297	-0.640223	-0.894046	-0.428301	0.119565	0.134166	-0.348077	0.147331	-0.041798	-0.350579	0.679404	-0.282756	-0.020637	0.22421	-0.048668	-0.035462	0.559839	-0.416922	0.32744	0.076879	-0.00687	0.315117
13357381	AT1G70460	3.74251	4.19574	3.50532	3.65693	3.6064	3.9862	3.8196	4.31029	4.0584	3.94857	3.51205	3.76227	3.9862	4.36466	4.03828	4.0918	3.91998	3.9862	4.70036	3.66901	3.85325	3.72462	4.46829	3.90367	0.243685	0.168924	0.532956	0.434868	0.313577	0	0.077089	0.114547	0.553075	0.291637	-0.094358	-0.223931	0.714161	-0.695654	-0.185024	-0.367184	0.54831	-0.082532	0.637072	-0.810201	-0.738099	-0.658821	0.642668	0.141399
13357611	AT1G70810	7.96302	7.99653	7.52719	7.2046	8.2548	8.47446	7.71861	8.06191	8.2819	7.36523	8.9397	9.59926	8.16775	8.40095	8.15142	8.00601	8.56517	9.12374	8.84789	8.85724	8.53713	8.24085	9.28691	9.31479	0.204724	0.404416	0.624233	0.801406	0.310366	0.64928	-0.244407	0.06538	0.754705	0.160627	0.684904	1.1248	0.680141	0.45629	0.385706	0.234844	0.721746	0.191046	0.924548	0.39091	-0.368999	0.074217	0.036842	-0.933757
13358361	AT1G72590	2.23972	2.20516	2.63465	2.43496	2.16511	2.67522	2.13601	2.60886	2.09803	2.28476	2.17199	2.03217	3.23212	2.48031	2.23119	2.80789	2.46222	2.23934	2.50438	2.2216	2.36544	2.38864	2.25241	2.82176	0.992399	0.275155	-0.403455	0.372924	0.29711	-0.435881	-0.103707	0.403701	-0.536621	-0.150208	0.00689	-0.643043	-0.727744	-0.258714	0.134241	-0.419247	-0.209801	0.582421	-0.624037	-0.662415	0.670862	-0.269039	-0.216691	1.22546
13358494	AT1G72910	7.20376	6.20019	8.35631	7.07551	6.84585	6.96539	6.76964	6.22764	7.76266	7.9884	7.57227	7.73831	6.92761	7.49377	8.72845	7.36264	7.73935	7.91845	7.78139	7.99686	8.06287	8.62869	8.29077	7.99529	-0.27615	1.29357	0.372133	0.287126	0.893501	0.953058	-0.434128	0.027443	-0.593656	0.912892	0.726428	0.772923	0.853778	0.503095	-0.665579	1.26605	0.551418	0.076845	1.28791	0.475652	-0.071923	0.353158	-0.17501	-0.696078
13358721	AT1G73480	9.06511	9.3625	8.21057	5.31679	10.0008	10.3188	9.51444	9.36146	8.59074	5.56319	10.4841	11.1012	8.83008	9.41693	8.46943	5.802	9.9795	10.1347	9.65693	9.60724	8.57082	6.04123	9.972	10.3308	-0.235031	0.054427	0.258866	0.485214	-0.021288	-0.18411	0.449327	-0.001041	0.380176	0.2464	0.48329	0.78244	0.826849	0.190313	0.101391	0.239228	-0.007504	0.19609	0.377522	0.191354	-0.278785	-0.007172	-0.490794	-0.58635
13358988	AT1G74080	4.90547	4.94806	4.45967	4.82718	4.39706	4.70146	4.6839	5.25812	4.63486	4.32369	5.2496	5.86843	5.59319	5.86055	5.77518	4.91761	5.0328	5.48039	7.10706	6.55925	5.41162	5.65912	5.12525	6.18186	0.687724	0.912489	1.3155	0.090437	0.635744	0.778936	-0.221565	0.310067	0.175189	-0.503488	0.852537	1.16697	1.51387	0.698703	-0.363553	0.741507	0.092442	0.701467	1.73544	0.388636	-0.538742	1.245	-0.760095	-0.465504
13359266	AT1G74870	5.29192	5.25364	5.10174	5.1575	4.93126	5.34724	5.3782	4.69458	5.4355	5.00551	5.03606	4.35277	6.46731	5.63042	5.82843	5.59826	5.39194	5.15395	7.21925	5.90352	5.66379	5.07374	5.58722	5.20725	1.17539	0.376777	0.72669	0.44076	0.460679	-0.193287	0.086277	-0.559064	0.333759	-0.151995	0.104797	-0.994466	0.751935	0.273099	-0.164637	-0.52452	0.195281	0.053298	0.665658	0.832163	-0.498396	-0.372525	0.090484	1.04776
13359300	AT1G75040	8.51635	8.04219	7.18407	8.03222	8.41631	9.55531	8.48848	8.45923	8.71171	8.89685	9.24374	11.2221	9.6972	9.78917	9.42374	10.3706	9.93095	11.2583	10.5722	10.1637	9.76667	10.6108	10.5586	11.3469	1.18085	1.74699	2.23967	2.33843	1.51464	1.70299	-0.027875	0.417041	1.52764	0.864635	0.827431	1.66683	0.874999	0.374547	0.342927	0.24012	0.627694	0.08856	0.902874	-0.042494	-1.18471	-0.624515	-0.199737	-1.57827
13359524	AT1G75700	4.22983	3.73812	4.59022	4.13488	4.49557	3.72877	4.21366	4.1813	4.25944	4.05447	4.07703	3.69166	4.92823	5.93931	5.60059	4.9727	6.03842	5.34801	5.6781	6.03031	6.14206	4.681	5.75637	5.75677	0.698398	2.20119	1.01038	0.837817	1.54285	1.61924	-0.016168	0.443182	-0.330774	-0.080412	-0.418534	-0.037108	0.749867	0.090994	0.541464	-0.291694	-0.282053	0.408761	0.766035	-0.352188	0.872238	-0.211282	0.136481	0.445869
13359559	AT1G75830	3.87397	3.53476	3.46109	3.20026	3.49286	3.05798	3.46385	3.5612	3.33283	3.29095	4.72454	3.36393	3.4904	3.72113	3.72683	3.36493	3.51346	3.21662	4.93079	5.6996	3.56037	5.16569	3.95022	3.22411	-0.383572	0.186365	0.265742	0.16467	0.020602	0.158641	-0.410119	0.026433	-0.128257	0.090696	1.23168	0.305947	1.44039	1.97847	-0.166463	1.80076	0.436757	0.007483	1.85051	1.95204	-0.038206	1.71007	-0.794926	-0.298464
13359765	AT1G76330	2.40823	2.36231	2.62295	2.94566	2.607	2.64107	2.31204	2.3849	2.51634	2.66336	2.43505	2.62011	3.40904	2.61732	3.02003	3.4108	2.56959	2.77724	2.61736	2.16196	2.8566	3.27291	2.89093	3.42592	1.0008	0.25501	0.397079	0.465147	-0.037408	0.136168	-0.096199	0.022588	-0.106612	-0.282299	-0.171945	-0.020962	-0.791683	-0.45536	-0.163431	-0.137891	0.321338	0.648689	-0.695484	-0.477948	-0.056819	0.144408	0.493283	0.669651
13359841	AT1G76560	7.21996	6.86051	6.61068	6.96599	7.37434	6.80372	7.33776	6.87809	6.81718	6.77134	7.11436	7.03016	6.66455	6.43044	6.66832	7.16877	7.1501	7.00575	7.3098	6.9726	6.83207	7.15638	7.20026	6.67617	-0.555408	-0.430073	0.057641	0.202782	-0.224237	0.202036	0.1178	0.017577	0.206498	-0.194653	-0.259978	0.226444	0.64525	0.542166	0.163754	-0.012387	0.050164	-0.329579	0.52745	0.524589	-0.042744	0.182266	0.310142	-0.556023
13359866	AT1G76590	8.98516	9.22176	8.83321	8.01369	7.82822	7.90317	9.31392	9.22595	8.73103	8.35047	8.05476	8.47622	7.8045	8.52445	8.72067	8.85715	8.1086	7.85623	8.81238	8.70321	8.56611	8.82144	7.91382	8.01664	-1.18066	-0.697309	-0.112545	0.843464	0.280379	-0.046946	0.328763	0.004193	-0.102181	0.336782	0.226537	0.573052	1.00788	0.178766	-0.154551	-0.035711	-0.194782	0.160414	0.679112	0.174573	-0.05237	-0.372493	-0.421319	-0.412638
13359872	AT1G76600	4.60945	4.12411	4.75418	4.06046	4.60199	4.11276	4.8164	4.56847	4.37078	5.05587	4.64052	4.85058	4.65008	4.32756	4.63554	4.4371	4.55549	4.55626	5.53664	4.84822	4.68386	4.97745	4.72516	4.95919	0.040623	0.203449	-0.118633	0.37664	-0.046501	0.443497	0.206947	0.444356	-0.383395	0.995405	0.038527	0.737816	0.886565	0.52066	0.048314	0.540342	0.169668	0.402927	0.679618	0.076304	0.431709	-0.455063	0.131141	-0.334889
13359953	AT1G76800	8.53849	7.89281	7.29265	7.4205	8.22969	8.71982	8.41789	8.02392	7.204	7.23303	7.87183	8.44934	8.33533	8.02064	6.78527	6.55431	8.2792	8.52581	7.35883	7.72769	6.61834	6.33129	8.05489	8.22268	-0.203166	0.127835	-0.507372	-0.866195	0.049509	-0.194011	-0.1206	0.131109	-0.088648	-0.187473	-0.357864	-0.270477	-0.976495	-0.292956	-0.166932	-0.223024	-0.224312	-0.303135	-0.855895	-0.424065	-0.078284	-0.035551	0.133552	-0.032658
13360673	ATH-MIR83	5.17213	5.65939	5.44781	6.27504	5.82887	5.68087	4.93776	5.25596	5.12644	5.65906	5.55669	5.19878	5.34547	4.96743	5.23027	6.0909	5.71215	5.41377	5.40742	5.19458	4.95073	5.99343	5.08379	5.41497	0.173342	-0.691967	-0.217543	-0.184135	-0.116719	-0.267098	-0.234368	-0.403436	-0.321376	-0.615979	-0.272181	-0.482087	0.06195	0.227149	-0.279541	-0.097475	-0.628361	0.001201	0.296318	0.630585	0.041835	0.518504	-0.35618	0.483288
13361030	AT1G79290	2.70765	3.21525	2.83437	2.52682	2.74903	2.78864	2.27282	3.65083	2.84041	2.64175	2.45515	2.61025	3.69838	2.69813	2.86017	3.07984	2.59056	2.76133	2.91773	2.84041	3.64373	3.09156	2.62901	3.26118	0.990728	-0.517123	0.025807	0.553017	-0.158474	-0.027313	-0.43484	0.435583	0.006039	0.114933	-0.29388	-0.17839	-0.780652	0.142277	0.783557	0.011723	0.038451	0.499845	-0.345812	-0.293306	0.777518	-0.10321	0.332331	0.678235
13361032	AT1G79290	2.70765	3.21525	2.83437	2.52682	2.74903	2.78864	2.27282	3.65083	2.84041	2.64175	2.45515	2.61025	3.69838	2.69813	2.86017	3.07984	2.59056	2.76133	2.91773	2.84041	3.64373	3.09156	2.62901	3.26118	0.990728	-0.517123	0.025807	0.553017	-0.158474	-0.027313	-0.43484	0.435583	0.006039	0.114933	-0.29388	-0.17839	-0.780652	0.142277	0.783557	0.011723	0.038451	0.499845	-0.345812	-0.293306	0.777518	-0.10321	0.332331	0.678235
13361051	AT1G79370	4.45847	5.17208	4.88089	4.75361	4.38671	5.11972	5.04009	5.53886	4.71116	4.77161	4.48636	5.09309	5.84398	4.24424	4.54837	4.435	4.55425	4.73867	5.09912	4.78858	4.64175	4.74508	5.11775	4.64478	1.38551	-0.927843	-0.332524	-0.318612	0.167541	-0.381043	0.581623	0.366775	-0.16973	0.018005	0.099659	-0.026626	-0.74486	0.544344	0.093385	0.31008	0.5635	-0.093888	-1.32648	0.177569	0.263115	0.292075	0.463841	-0.067262
13361080	AT1G79450	5.5462	5.27644	4.77059	4.66206	4.54006	5.35014	5.55657	5.66888	5.76874	4.47306	5.97135	6.9231	6.97269	7.20168	7.1952	6.19878	6.42366	6.99313	7.84993	7.90595	7.5979	6.65491	6.87811	8.11472	1.4265	1.92524	2.42462	1.53673	1.8836	1.64299	0.010378	0.392434	0.99815	-0.188997	1.43128	1.57296	0.877238	0.704262	0.40269	0.456127	0.454448	1.12159	0.86686	0.311828	-0.59546	0.645124	-0.976835	-0.451373
13361429	AT1G80160	6.10648	7.39176	5.52854	5.87248	7.30868	7.63743	6.63253	7.48982	7.18159	5.59072	7.30834	8.898	6.58103	7.397	7.51058	6.58487	8.27841	7.41944	7.29517	8.51207	8.24018	7.77489	7.42114	9.18514	0.474549	0.005234	1.98204	0.712388	0.969734	-0.21799	0.526048	0.098059	1.65305	-0.281764	-0.000338	1.26057	0.714144	1.11507	0.729597	1.19002	-0.857275	1.76571	0.188096	1.01701	-0.923453	1.47179	-0.856937	0.505135
13361730	AT1G80840	8.59812	7.63098	8.75286	7.63001	7.24611	6.01705	9.00435	8.14849	8.32355	8.85985	7.15499	8.06154	9.64195	8.67944	9.1928	8.43252	7.80295	8.19289	10.3038	9.46992	8.46542	9.62443	7.63061	8.61428	1.04383	1.04846	0.439934	0.802509	0.556841	2.17584	0.406235	0.517508	-0.429314	1.22984	-0.091126	2.04449	0.661831	0.790481	-0.727379	1.19191	-0.172344	0.421386	0.255596	0.272973	-0.298065	-0.037925	-0.081218	-1.62311
13361913	AT1G01250	6.00638	6.68463	6.6786	6.37447	7.26822	8.7843	6.1308	6.70468	6.38068	6.42438	7.03474	7.94808	5.77614	7.03142	6.49774	6.26894	7.01297	7.53993	6.56457	6.34984	6.21877	6.20085	6.62915	7.04116	-0.230238	0.346784	-0.180865	-0.10553	-0.255254	-1.24438	0.124419	0.02005	-0.297916	0.049916	-0.233482	-0.836221	0.788427	-0.681574	-0.27897	-0.068085	-0.383821	-0.498766	0.664008	-0.701624	0.018946	-0.118001	-0.150339	0.337455
13361985	AT1G01453	3.12572	3.28391	2.83447	3.55054	2.78112	3.0876	2.74157	3.29642	3.30448	2.86052	3.07278	3.16367	3.49513	3.44285	3.88539	2.7389	2.93123	3.05043	2.83886	3.22731	3.34104	3.31312	2.93123	3.21367	0.369413	0.158944	1.05093	-0.811637	0.150107	-0.037172	-0.384149	0.012516	0.470014	-0.690014	0.291652	0.07607	-0.656272	-0.215535	-0.54435	0.57422	0	0.16324	-0.272123	-0.228051	-1.01436	1.26423	-0.291652	0.08717
13362213	AT1G02070	4.5968	4.00336	4.09434	4.11509	3.96305	3.94054	4.65719	4.078	3.98883	4.21802	3.94152	3.89412	4.22884	4.98447	3.99795	4.30363	4.20626	4.55028	4.92459	4.34229	4.23031	4.68168	3.841	4.23033	-0.367959	0.981105	-0.096393	0.188542	0.243209	0.609738	0.06039	0.07464	-0.105505	0.102933	-0.021524	-0.046423	0.695752	-0.642177	0.232363	0.378049	-0.365255	-0.319947	0.635362	-0.716817	0.337868	0.275116	-0.343731	-0.273524
13362417	AT1G02630	5.59405	4.37741	3.65043	4.45741	4.27771	4.70472	5.44352	4.61375	3.65787	4.50246	3.89561	3.54217	4.7918	4.1314	4.34502	4.06788	4.10714	4.34059	3.66219	4.1529	3.50751	3.91056	4.16934	4.02471	-0.802244	-0.24601	0.694596	-0.38953	-0.170567	-0.364135	-0.150532	0.236346	0.007446	0.045059	-0.3821	-1.16255	-1.12961	0.021504	-0.837517	-0.157314	0.062206	-0.315881	-0.979079	-0.214842	-0.844963	-0.202373	0.444306	0.846669
13362490	AT1G02830	2.83533	2.85283	3.20561	2.98767	3.03808	2.83505	3.24092	3.03625	2.88215	3.1699	2.84676	3.04783	3.76877	3.08338	2.90388	3.31517	2.92845	3.18425	3.08919	3.20153	3.21797	3.46765	3.07789	2.93357	0.93344	0.230547	-0.301729	0.327503	-0.109634	0.349196	0.405594	0.183416	-0.323453	0.18223	-0.191323	0.212782	-0.679579	0.118144	0.314091	0.152477	0.149442	-0.25068	-1.08517	-0.065272	0.637544	-0.029753	0.340765	-0.463462
13362548	AT1G02920	9.40184	8.55826	7.9531	7.62675	8.07804	7.35044	9.8864	9.77757	9.77471	8.60425	8.86185	9.55799	9.3103	9.17807	8.44739	8.32763	8.08618	8.45186	10.2754	10.0316	9.26085	9.07655	8.73208	9.05304	-0.091535	0.619819	0.494285	0.700873	0.008134	1.10142	0.484566	1.21932	1.8216	0.977494	0.7838	2.20755	0.965127	0.853555	0.813461	0.74892	0.645904	0.601182	0.480561	-0.365763	-1.00814	-0.228574	-0.137896	-1.60637
13362675	AT1G03106	3.03997	3.73423	3.15787	3.39221	3.78948	3.71737	3.51116	3.67492	4.00422	3.28424	3.38114	3.41924	5.45871	5.80216	6.70603	6.94892	6.63936	6.43325	6.09875	5.70185	6.65583	7.21701	6.7523	6.39383	2.41874	2.06792	3.54816	3.55671	2.84988	2.71589	0.471188	-0.059312	0.84635	-0.107969	-0.408337	-0.298128	0.640041	-0.100309	-0.0502	0.268086	0.112936	-0.039428	0.168853	-0.040997	-0.89655	0.376055	0.521273	0.2587
13362715	AT1G03300	8.07295	8.13796	8.11043	7.99376	7.89154	7.59854	8.0981	8.20722	8.02111	7.88187	7.46203	6.86368	6.33302	6.64285	6.52754	6.50367	7.1211	6.43028	5.62708	6.1659	7.07664	5.84846	6.57714	6.17368	-1.73993	-1.49511	-1.58289	-1.49009	-0.770443	-1.16827	0.025151	0.069261	-0.08932	-0.111889	-0.429509	-0.734865	-0.705946	-0.476954	0.549102	-0.655213	-0.54396	-0.256596	-0.731097	-0.546215	0.638422	-0.543324	-0.114451	0.478269
13362860	AT1G03660	5.32281	5.07999	4.59145	5.45632	3.95929	4.48418	5.31419	4.94529	4.95005	4.91071	5.41902	5.3369	6.55668	6.06054	5.59692	5.99166	6.27789	5.74887	7.54783	7.04749	5.70927	6.15809	6.45555	6.26915	1.23388	0.980543	1.00547	0.53534	2.3186	1.26469	-0.008618	-0.134708	0.3586	-0.545603	1.45974	0.852719	0.991149	0.986956	0.112353	0.166433	0.177659	0.520284	0.999767	1.12166	-0.246247	0.712036	-1.28208	-0.332435
13362949	AT1G03850	5.97578	5.25576	4.34941	4.71733	5.37343	4.01374	6.04254	5.43575	6.21918	4.95321	5.78666	6.15382	8.20327	8.08714	8.0803	8.55362	8.07093	8.06786	8.98809	8.79353	8.15271	8.96856	8.56041	8.33086	2.22748	2.83138	3.73089	3.83629	2.6975	4.05412	0.066761	0.179992	1.86977	0.235881	0.41323	2.14008	0.784828	0.706388	0.07241	0.414935	0.489477	0.262992	0.718067	0.526396	-1.79737	0.179054	0.076247	-1.87708
13363114	AT1G04280	8.54995	8.04866	7.94787	8.62543	8.65365	8.10909	8.69895	8.24401	8.10877	8.696	8.46844	8.4324	8.68489	8.3689	8.28497	8.94304	9.00316	8.89818	9.36783	8.81772	8.3343	9.20986	9.20022	9.24311	0.13494	0.320241	0.337095	0.317615	0.349514	0.789093	0.149	0.195348	0.160904	0.070571	-0.185203	0.323312	0.682943	0.448824	0.049331	0.266822	0.197053	0.344934	0.533943	0.253476	-0.111573	0.196251	0.382256	0.021622
13363506	AT1G04980	7.72916	8.48239	8.86053	6.5382	7.33441	7.74113	7.92579	8.27345	9.06344	6.5164	8.2887	9.64813	8.21984	8.60372	8.97097	6.80895	8.09026	8.86701	8.87049	8.48633	9.1499	6.5812	9.03343	9.26655	0.490677	0.121336	0.110441	0.270751	0.755843	1.12588	0.196627	-0.208937	0.202907	-0.021798	0.954282	1.907	0.650655	-0.117395	0.178928	-0.227748	0.943178	0.399542	0.454028	0.091542	-0.023979	-0.20595	-0.011104	-1.50746
13363740	AT1G05340	6.1548	6.26048	5.94625	5.62563	5.79056	5.94283	6.16853	6.55899	6.1533	5.75851	5.55241	6.92287	6.33513	5.93784	6.43915	6.12414	6.09834	6.39491	7.04152	7.08174	6.74071	6.39764	5.91936	7.89422	0.180336	-0.322638	0.492897	0.498509	0.307781	0.452089	0.013737	0.298506	0.207041	0.132884	-0.238145	0.980048	0.706387	1.14389	0.301559	0.273499	-0.178972	1.49931	0.69265	0.845388	0.094518	0.140615	0.059173	0.519263
13363859	AT1G05560	7.67228	7.63646	8.59169	8.42426	8.5288	8.66133	8.3366	8.01679	8.96701	9.05988	8.5203	8.05749	7.43021	7.47974	8.39706	8.44978	8.32439	8.221	8.64078	8.35216	8.57708	8.98724	8.17028	7.70701	-0.242068	-0.156713	-0.194633	0.025515	-0.204407	-0.440332	0.66432	0.380336	0.375311	0.635622	-0.008502	-0.603843	1.21057	0.872418	0.180015	0.537458	-0.154107	-0.513994	0.546248	0.492082	-0.195296	-0.098164	-0.145605	0.089849
13363948	AT1G05675	6.88678	5.0495	4.43639	5.3617	4.81846	4.3503	7.30078	5.73693	5.4187	6.43158	4.02045	3.86327	7.07944	5.16744	4.93832	5.92488	5.83427	4.64123	7.96877	6.22452	5.08547	6.93036	4.98263	4.43409	0.192652	0.117943	0.501927	0.563181	1.01581	0.29093	0.413993	0.687438	0.982312	1.06988	-0.79801	-0.487033	0.889338	1.05709	0.147156	1.00548	-0.851646	-0.207139	0.475345	0.369647	-0.835156	-0.064405	-0.053636	0.279894
13364004	AT1G05925	3.41028	3.43144	3.47265	3.20446	3.23057	4.02575	3.32291	3.07538	3.47605	2.88467	3.09187	3.82338	3.37473	3.52147	3.24028	3.5058	3.44516	3.43469	4.63396	3.70544	4.08342	3.54351	3.43469	3.40539	-0.03555	0.090028	-0.232372	0.301344	0.214582	-0.591066	-0.087368	-0.356057	0.003397	-0.319792	-0.1387	-0.20237	1.25923	0.183974	0.843148	0.037704	-0.01047	-0.029298	1.3466	0.540031	0.839751	0.357496	0.12823	0.173072
13364507	AT1G07060	2.7837	2.78228	3.33304	2.90729	2.7837	2.94601	3.09254	2.97869	2.68324	3.21603	3.17931	2.85876	3.14469	2.88176	3.78062	3.36244	3.0518	3.21325	4.0137	3.62488	3.46238	3.25802	3.08873	3.64725	0.360987	0.099487	0.447577	0.45515	0.268095	0.267235	0.308834	0.196414	-0.649802	0.30874	0.395611	-0.087252	0.869011	0.74312	-0.318239	-0.104415	0.036932	0.433998	0.560177	0.546706	0.331563	-0.413155	-0.358679	0.52125
13364614	AT1G07290	5.59666	5.44191	5.30409	6.27389	5.59808	5.93323	5.8492	5.47673	5.4731	6.65927	5.44924	5.78821	5.93354	5.30207	6.13721	6.60641	6.04258	5.9509	5.11405	5.28683	5.7533	6.35004	5.78974	6.20069	0.336871	-0.139839	0.833125	0.33252	0.444499	0.01767	0.252532	0.034823	0.169014	0.385382	-0.148839	-0.14502	-0.819482	-0.015236	-0.383908	-0.256369	-0.252834	0.249795	-1.07201	-0.050059	-0.552922	-0.641751	-0.103995	0.394815
13364686	AT1G07473	3.50063	3.50173	3.62777	3.75556	3.47349	3.58989	3.7175	3.83555	3.32232	3.57602	3.72538	3.93019	3.51505	4.20284	4.13277	4.11158	3.54627	3.71168	4.14514	3.82131	3.63652	3.68931	3.3961	3.85737	0.014426	0.701108	0.504995	0.356025	0.072781	0.121788	0.216869	0.333823	-0.305452	-0.179539	0.251889	0.340298	0.630089	-0.381531	-0.496247	-0.42227	-0.150169	0.14569	0.41322	-0.715354	-0.190795	-0.242731	-0.402058	-0.194608
13364865	AT1G07780	2.83926	2.81488	3.17182	3.04438	2.77956	2.84089	3.29971	2.71654	3.2605	3.06908	2.63868	3.05663	3.53177	4.00377	3.82773	4.52767	4.00998	4.26695	4.26831	3.89538	3.52898	4.1614	4.09204	4.59287	0.692508	1.18889	0.655905	1.48329	1.23042	1.42606	0.460443	-0.098336	0.088677	0.024707	-0.140878	0.215733	0.736543	-0.108387	-0.298752	-0.366268	0.082066	0.32592	0.2761	-0.010051	-0.387429	-0.390975	0.222944	0.110187
13365263	AT1G08630	6.80685	7.21617	6.31069	5.20212	6.32844	4.86288	7.27592	7.89986	6.35862	5.20859	5.08464	5.8914	6.4941	6.51162	5.86508	4.80013	5.16954	4.58859	7.65662	6.87425	6.43051	5.11648	4.62849	5.04509	-0.312754	-0.704555	-0.445609	-0.401998	-1.1589	-0.274285	0.469063	0.683687	0.047935	0.006471	-1.2438	1.02852	1.16252	0.362632	0.565434	0.316356	-0.541053	0.456491	0.693461	-0.321055	0.517499	0.309885	0.702748	-0.57203
13365511	AT1G09170	4.16545	4.62971	4.29032	5.25136	4.62933	4.57766	4.28147	4.61775	4.60322	4.96915	4.50065	4.49486	4.37662	5.01941	4.8157	5.58171	4.89625	4.75662	5.20831	5.66994	5.86576	5.27329	5.33952	5.43017	0.21117	0.3897	0.525388	0.330349	0.266918	0.178956	0.116019	-0.011962	0.312903	-0.282213	-0.128681	-0.082801	0.831688	0.650533	1.05006	-0.308421	0.443271	0.673556	0.715669	0.662495	0.737155	-0.026208	0.571952	0.756357
13365689	AT1G09550	3.43699	4.10448	4.19977	3.68803	3.52271	4.06956	3.536	3.92686	3.52014	3.55546	3.40668	4.0466	3.4676	3.57545	4.05992	3.19278	3.46197	3.77034	4.14708	3.83752	3.50104	3.63852	3.91736	3.4695	0.030607	-0.529028	-0.13985	-0.495253	-0.060734	-0.299225	0.099017	-0.177622	-0.679636	-0.132566	-0.11603	-0.022962	0.679484	0.262075	-0.558884	0.44574	0.455389	-0.300838	0.580467	0.439697	0.120752	0.578306	0.571419	-0.277876
13365934	AT1G09935	3.35868	3.40265	3.5677	3.11484	3.39021	3.47506	3.33359	3.51118	2.91111	3.25898	3.74833	4.44799	4.59439	3.56156	3.67786	4.11393	3.43905	4.07507	5.62701	3.74065	3.51797	4.77474	4.93831	6.24777	1.23571	0.158907	0.110152	0.999094	0.048842	0.600008	-0.025088	0.108532	-0.656593	0.144146	0.358125	0.972925	1.03263	0.179091	-0.159882	0.660807	1.49926	2.1727	1.05771	0.070559	0.496711	0.516661	1.14113	1.19977
13366036	AT1G10140	8.30238	7.9871	7.13363	6.61342	6.99758	6.23668	8.50945	8.33186	7.38953	6.60819	6.73091	7.02186	7.39353	7.15599	6.66047	6.60445	6.12086	5.60609	8.07651	7.69615	7.06255	6.91691	5.91025	6.70394	-0.90885	-0.831112	-0.473157	-0.008974	-0.876721	-0.630596	0.207071	0.34476	0.255904	-0.005233	-0.266676	0.785175	0.682983	0.540157	0.402082	0.312465	-0.210607	1.09785	0.475912	0.195397	0.146178	0.317698	0.056069	0.312679
13366144	AT1G10400	3.69509	4.05301	4.04412	3.78843	4.18868	4.15121	3.83474	4.29844	4.08611	4.00744	3.82444	4.12022	4.09801	4.23551	4.31385	3.94097	4.37502	4.06353	4.77987	3.71681	4.2086	4.08088	3.89098	4.45295	0.402918	0.182502	0.26973	0.152546	0.186341	-0.08768	0.139651	0.24543	0.041991	0.219018	-0.364244	-0.030989	0.681859	-0.518705	-0.10525	0.139908	-0.484041	0.389426	0.542208	-0.764135	-0.147241	-0.07911	-0.119797	0.420415
13366730	AT1G11490	4.14679	4.45338	4.57695	4.07678	3.89655	4.10283	3.89656	4.28371	3.96394	4.19516	3.89384	4.18151	4.74639	4.56333	4.30487	4.4639	4.08919	4.20214	3.8375	4.15576	4.36318	4.16115	4.73869	4.49273	0.599601	0.109949	-0.272073	0.387119	0.192642	0.09931	-0.250226	-0.169675	-0.613007	0.118378	-0.002707	0.07868	-0.908893	-0.407575	0.05831	-0.302753	0.649504	0.290585	-0.658667	-0.2379	0.671317	-0.421131	0.652211	0.211905
13367421	AT1G13340	6.10433	6.42281	6.12786	6.27994	6.48061	6.03096	6.40529	6.43456	6.84067	6.50554	7.41242	8.71758	7.9126	7.52097	7.62008	8.07536	7.85619	8.10573	8.78181	7.92948	7.52701	8.29621	8.53357	9.10594	1.80828	1.09816	1.49222	1.79542	1.37558	2.07477	0.300964	0.011748	0.712809	0.225601	0.93181	2.68662	0.869205	0.408501	-0.093063	0.220854	0.677378	1.00021	0.568241	0.396753	-0.805872	-0.004747	-0.254432	-1.68641
13367490	AT1G13470	8.48536	7.80634	7.57222	7.03183	7.64279	8.33011	8.49368	8.132	9.03958	8.1168	9.03535	9.77479	9.19129	9.37473	10.2855	9.80572	9.90322	10.3292	10.0692	10.3364	9.98006	10.3335	10.4876	10.2092	0.705936	1.56838	2.71327	2.77389	2.26042	1.99913	0.008322	0.325659	1.46736	1.08497	1.39255	1.44468	0.877867	0.961644	-0.305435	0.527747	0.584423	-0.12003	0.869545	0.635985	-1.7728	-0.557221	-0.808132	-1.56471
13367703	ATH-MIR83	2.79893	2.5767	3.31482	2.8578	2.77302	2.57963	2.78433	2.97776	2.96106	3.09556	2.55556	2.84362	2.71852	3.09075	3.54832	3.32688	3.4927	2.36527	3.5804	2.79904	2.98337	3.4123	2.70521	2.25843	-0.080416	0.514053	0.233491	0.469079	0.719686	-0.214361	-0.014602	0.401057	-0.353765	0.237755	-0.217461	0.263995	0.861884	-0.291711	-0.564949	0.085417	-0.787495	-0.106831	0.876486	-0.692768	-0.211184	-0.152338	-0.570034	-0.370826
13368138	AT1G14870	7.34232	6.4103	5.1108	5.74078	5.42141	4.9102	7.7388	7.10836	7.06977	6.45621	6.30898	6.32145	7.72565	6.86582	6.63773	6.25129	6.46644	6.06592	8.39868	8.07361	7.42272	7.24769	6.20574	6.83059	0.383332	0.455519	1.52693	0.510516	1.04503	1.15572	0.396484	0.698052	1.95897	0.715427	0.887574	1.41125	0.673034	1.20779	0.784984	0.996398	-0.260698	0.764665	0.27655	0.509737	-1.17398	0.280971	-1.14827	-0.646587
13368493	AT1G15550	7.69616	6.87555	6.14001	7.66182	7.2389	7.6773	7.75025	6.76558	6.1172	7.12139	6.79445	6.76172	7.30545	6.3866	5.92278	6.65841	6.9191	7.25436	6.28196	5.89978	5.78845	6.61888	6.7608	6.87873	-0.390708	-0.488951	-0.217223	-1.0034	-0.319801	-0.42294	0.054086	-0.109977	-0.022808	-0.540432	-0.44445	-0.915577	-1.02349	-0.486818	-0.134328	-0.039533	-0.1583	-0.375633	-1.07758	-0.376841	-0.11152	0.500899	0.28615	0.539944
13368545	AT1G15757	3.88543	4.30897	4.3982	3.86612	4.7508	4.45061	3.81544	5.79833	4.33866	4.37456	3.7115	5.04293	3.90186	4.2447	4.04459	4.15541	3.48183	5.23401	4.56677	3.63684	4.16999	4.24899	4.79413	4.67132	0.01643	-0.064271	-0.353614	0.289288	-1.26897	0.783401	-0.06999	1.48935	-0.059544	0.508437	-1.03931	0.592321	0.664911	-0.607856	0.125404	0.093579	1.31229	-0.562692	0.734901	-2.09721	0.184948	-0.414858	2.3516	-1.15501
13368553	AT1G15772	2.6738	2.61556	4.51441	2.67779	2.65149	2.51221	3.16156	2.85376	2.55094	2.42315	2.48274	2.69937	3.30079	2.83442	2.48927	2.89304	2.4832	2.67193	2.62475	2.67707	2.61851	2.74545	2.78296	2.8337	0.626989	0.218865	-2.02514	0.215242	-0.168293	0.15972	0.487761	0.238202	-1.96347	-0.254645	-0.168752	0.187159	-0.676032	-0.157352	0.129245	-0.147587	0.299761	0.161769	-1.16379	-0.395554	2.09271	0.107058	0.468513	-0.02539
13368634	AT1G15990	5.08249	5.89673	5.39158	5.43506	5.27389	6.09721	5.05509	6.01463	5.27389	5.0945	5.27917	5.69953	4.84558	5.72214	5.27389	5.27389	5.4214	5.41196	5.48065	5.27389	5.21189	4.80541	5.59685	5.23027	-0.236911	-0.174595	-0.117695	-0.161173	0.147516	-0.685251	-0.027396	0.1179	-0.117695	-0.340556	0.005285	-0.397685	0.63507	-0.448253	-0.061993	-0.468477	0.175444	-0.181687	0.662466	-0.566153	0.055702	-0.127921	0.170159	0.215998
13368650	AT1G16022	6.288	6.44526	6.15404	6.60233	6.33982	6.59053	6.24428	6.59888	5.893	6.37525	6.21042	6.15831	6.26392	6.34488	5.99445	6.28331	6.34004	6.27602	6.8998	6.24067	6.21131	6.25176	6.65141	5.72953	-0.024083	-0.100377	-0.159586	-0.319021	0.000215	-0.314509	-0.04372	0.153621	-0.261041	-0.227078	-0.129405	-0.432221	0.63588	-0.104206	0.216854	-0.031545	0.311379	-0.546489	0.6796	-0.257827	0.477895	0.195533	0.440784	-0.114268
13368764	AT1G16360	3.74267	3.51761	3.28835	3.27331	3.12637	2.91373	4.26696	3.44817	3.87915	3.53116	3.46192	3.1414	4.37915	3.91993	3.51298	4.0924	3.68232	3.57371	3.4128	3.21042	3.69259	3.71373	3.73536	3.44825	0.636476	0.402317	0.224626	0.819093	0.555947	0.659983	0.524289	-0.069435	0.590801	0.257846	0.335553	0.227664	-0.966341	-0.709502	0.17961	-0.378677	0.053048	-0.12547	-1.49063	-0.640067	-0.411191	-0.636523	-0.282505	-0.353134
13369332	AT1G17744	6.06185	5.66681	5.77093	6.69224	6.58678	7.58474	6.27949	6.1512	6.87176	7.30907	7.76102	8.90006	6.85759	6.93668	7.32104	7.56911	7.25218	8.12477	7.83865	7.48693	7.52611	7.9919	7.78711	8.7197	0.795738	1.26987	1.55011	0.876869	0.665404	0.540033	0.217643	0.484391	1.10084	0.616823	1.17424	1.31532	0.981059	0.550252	0.20507	0.422787	0.534924	0.594929	0.763416	0.065861	-0.895768	-0.194036	-0.639316	-0.720395
13370081	AT1G19610	6.31018	6.4809	6.3428	6.17254	6.5553	5.12826	6.84253	6.81263	7.03263	5.52887	6.0609	4.40907	6.22911	6.18798	6.41881	6.16544	7.06944	5.82124	6.8722	7.23845	7.09882	6.70117	6.50101	5.29135	-0.081072	-0.292914	0.076016	-0.007107	0.514138	0.692974	0.532349	0.331728	0.689834	-0.64367	-0.494404	-0.719195	0.643092	1.05046	0.680002	0.535736	-0.568436	-0.52989	0.110743	0.718734	-0.009832	1.17941	-0.074032	0.189305
13370249	AT1G19940	5.06205	4.45997	5.24088	6.01628	5.64682	6.27101	4.49845	4.8181	4.70235	5.48862	6.04002	6.14087	5.59857	5.47439	5.71504	6.15674	6.2961	6.29177	4.94673	5.04425	5.10385	5.65999	5.53765	5.53627	0.536518	1.01442	0.474164	0.140459	0.649279	0.020761	-0.563601	0.358136	-0.538529	-0.527658	0.393198	-0.130138	-0.651843	-0.430139	-0.611197	-0.496748	-0.75845	-0.755504	-0.088242	-0.788275	-0.072668	0.03091	-1.15165	-0.625366
13370503	AT1G20570	4.55664	5.2725	4.82592	5.73821	5.22276	5.16422	4.11276	5.46298	4.74485	5.03742	4.59486	4.23649	4.47305	4.78	5.33255	5.85577	4.94248	5.15303	5.19665	4.33776	5.23163	5.57214	5.36949	4.65718	-0.083594	-0.492502	0.506631	0.117558	-0.280279	-0.011192	-0.443878	0.190486	-0.08107	-0.700791	-0.627905	-0.927724	0.723604	-0.442239	-0.100926	-0.283633	0.427006	-0.495842	1.16748	-0.632725	-0.019856	0.417158	1.05491	0.431882
13370749	AT1G21100	5.01119	4.32602	3.82932	3.38812	4.35588	2.66562	4.52565	4.38708	4.4883	4.45057	3.94073	2.67369	5.36827	4.7306	5.04528	4.66663	5.2794	4.45078	6.48627	5.49045	5.16441	5.46198	5.12143	4.41746	0.357078	0.404581	1.21596	1.2785	0.923514	1.78516	-0.485541	0.061065	0.65898	1.06245	-0.415148	0.008077	1.118	0.75985	0.119132	0.795355	-0.15797	-0.03332	1.60354	0.698785	-0.539848	-0.267095	0.257178	-0.041397
13370754	AT1G21110	4.37482	3.9786	3.37396	3.63155	3.23217	2.49776	4.84787	3.7934	3.8115	3.7335	3.3737	3.43909	3.1534	2.58811	3.14764	2.7478	2.78773	2.93655	2.44885	3.01847	2.66904	2.35148	2.78572	2.36425	-1.22142	-1.3905	-0.22632	-0.883754	-0.44444	0.438793	0.473052	-0.185204	0.437542	0.101942	0.141529	0.941329	-0.704547	0.430361	-0.478602	-0.396314	-0.002014	-0.572296	-1.1776	0.615565	-0.916144	-0.498256	-0.143543	-1.51362
13370912	AT1G21550	6.03711	6.04063	5.75313	3.92587	5.52232	5.54551	6.00519	5.95296	6.24329	4.12205	6.08095	6.71867	6.33042	5.83864	5.60004	4.61729	6.36355	6.31673	7.14116	6.49116	6.40259	4.83612	7.03048	7.79978	0.293306	-0.201994	-0.153087	0.69142	0.84123	0.771223	-0.031921	-0.087672	0.490158	0.196182	0.55863	1.17316	0.810747	0.652528	0.802552	0.218831	0.666925	1.48305	0.842668	0.7402	0.312394	0.022649	0.108295	0.309891
13370952	AT1G21650	7.89386	8.69001	9.21086	8.77088	7.77193	8.42577	7.72531	8.32213	9.37371	8.82186	8.09194	8.35326	8.27043	8.67407	8.92491	8.86701	7.80865	8.43202	7.61583	8.61391	9.04929	8.978	7.76573	8.22214	0.376573	-0.015941	-0.285952	0.096133	0.036719	0.006247	-0.16855	-0.367883	0.162851	0.050982	0.320011	-0.072512	-0.654604	-0.060166	0.124382	0.110994	-0.042914	-0.209884	-0.486054	0.307717	-0.038469	0.060012	-0.362925	-0.137372
13371021	AT1G21850	3.16243	4.09256	2.90207	3.66201	3.48026	3.86594	3.44631	3.92739	3.09866	3.14642	3.40051	4.13281	3.61506	3.96253	3.78741	3.3685	3.48026	3.23914	4.86824	3.68049	3.58527	3.16666	3.48026	3.88405	0.452632	-0.130032	0.885336	-0.293506	0	-0.626799	0.283886	-0.16517	0.196583	-0.515582	-0.079749	0.266874	1.25318	-0.282047	-0.202136	-0.201837	0	0.644907	0.969293	-0.116877	-0.398719	0.313745	0.079749	0.378033
13371030	AT1G21860	2.57031	3.2751	3.64754	2.64974	3.35192	3.64812	2.94185	3.68934	3.1541	3.76627	3.07073	3.79912	3.83746	3.58749	4.13962	3.28243	2.5897	3.57847	3.0453	3.586	3.05323	3.20303	3.60336	2.83757	1.26716	0.312393	0.492076	0.632696	-0.762214	-0.069644	0.371545	0.414238	-0.493436	1.11653	-0.281184	0.151006	-0.792161	-0.001494	-1.08639	-0.079405	1.01365	-0.7409	-1.16371	-0.415732	-0.592951	-1.19593	1.29484	-0.891906
13371259	AT1G22400	7.58271	6.6544	6.79342	6.95524	6.40983	5.57059	7.54375	7.24955	7.217	7.68693	6.89956	7.87672	7.02495	5.83821	5.99759	6.6459	5.44928	6.18777	7.68575	6.74834	6.50365	7.63303	6.48038	7.30466	-0.557754	-0.816193	-0.795836	-0.309344	-0.960557	0.617174	-0.038962	0.595145	0.423574	0.731689	0.489727	2.30613	0.660801	0.910128	0.506059	0.987126	1.0311	1.11689	0.699763	0.314983	0.082485	0.255437	0.541376	-1.18923
13371618	AT1G23340	5.54016	6.01231	5.98238	5.9616	6.40391	6.13812	5.76872	5.77863	5.85556	5.68308	6.68208	4.97505	6.54375	6.96098	7.10272	6.72671	7.36953	6.1398	5.6981	6.60383	7.01453	6.8152	6.98431	6.01712	1.00359	0.948668	1.12034	0.765104	0.965615	0.001675	0.228563	-0.233675	-0.126821	-0.278526	0.278164	-1.16307	-0.845651	-0.357145	-0.088192	0.088487	-0.385218	-0.122683	-1.07421	-0.12347	0.038629	0.367013	-0.663382	1.04039
13371863	AT1G23960	9.12483	9.23803	9.11406	9.11754	8.88366	8.7228	9.25581	9.26235	9.00862	9.00771	8.7899	8.83699	4.41382	4.12696	3.65903	3.7677	3.86467	3.03993	3.61454	3.14934	3.85659	3.22464	3.42718	3.86077	-4.71101	-5.11107	-5.45502	-5.34983	-5.01899	-5.68287	0.130984	0.024319	-0.105436	-0.109829	-0.093761	0.11419	-0.799281	-0.977624	0.197557	-0.54307	-0.437491	0.820849	-0.930265	-1.00194	0.302993	-0.433241	-0.34373	0.706659
13372229	AT1G25220	3.56381	3.8039	3.56718	3.99546	3.34037	3.40989	3.86204	3.61716	3.57353	4.79436	4.82235	4.99829	3.06444	3.66765	3.15013	3.58813	2.75593	4.12843	4.03041	4.53219	4.1132	3.41989	3.88837	3.45407	-0.499373	-0.136251	-0.417054	-0.407339	-0.584437	0.718535	0.298221	-0.186739	0.00635	0.798899	1.48199	1.5884	0.965968	0.864543	0.963072	-0.168237	1.13244	-0.674352	0.667747	1.05128	0.956722	-0.967136	-0.349549	-2.26275
13372429	AT1G26100	8.35704	8.38159	8.6804	8.93542	8.90406	9.11419	8.48123	8.09535	8.07453	8.4307	8.85357	8.49039	8.03989	7.94109	8.03027	8.22641	8.33172	8.32616	7.18374	7.67274	8.38384	8.11378	8.16721	8.16698	-0.317146	-0.440494	-0.650131	-0.709015	-0.572336	-0.788023	0.124194	-0.286235	-0.605873	-0.504719	-0.050488	-0.623801	-0.856152	-0.268357	0.353567	-0.112631	-0.164511	-0.159181	-0.980346	0.017878	0.95944	0.392088	-0.114023	0.46462
13372633	AT1G26410	5.53663	4.955	4.72992	5.21927	4.67124	4.11328	5.86459	6.21585	7.08216	5.70568	5.60454	4.53159	5.94705	5.49367	5.38995	5.66553	5.72648	4.49763	6.91204	7.49877	7.25645	6.13672	6.51875	5.7404	0.410424	0.538671	0.660038	0.446266	1.05524	0.384347	0.327967	1.26085	2.35224	0.486412	0.933307	0.418311	0.964985	2.0051	1.8665	0.471183	0.792268	1.24278	0.637018	0.744253	-0.485746	-0.015229	-0.141039	0.824469
13372866	AT1G27213	3.19589	3.13455	2.8405	3.2417	3.19494	2.99232	3.65046	3.45047	3.19548	3.30661	2.91128	3.29065	3.99905	3.57949	3.61002	3.51418	3.24071	3.71759	3.34266	3.43173	3.55991	3.87592	3.31422	3.76233	0.803166	0.444931	0.769515	0.272478	0.045769	0.725261	0.454579	0.315913	0.354982	0.064913	-0.283656	0.298325	-0.656396	-0.147754	-0.050105	0.361739	0.073513	0.044747	-1.11098	-0.463667	-0.405087	0.296826	0.357169	-0.253578
13373070	AT1G27890	2.53142	1.8227	2.12153	2.05363	2.2087	2.00259	2.1699	2.212	1.98682	2.55068	2.09231	1.95926	2.88678	2.37992	2.65108	2.58247	2.22126	2.1699	2.04443	2.62724	1.95549	2.10204	2.41916	2.00087	0.355354	0.557225	0.529545	0.528845	0.01256	0.167303	-0.361526	0.389299	-0.134714	0.497049	-0.116394	-0.043333	-0.842351	0.247313	-0.69559	-0.480428	0.197897	-0.169028	-0.480825	-0.141986	-0.560876	-0.977477	0.314291	-0.125695
13373139	AT1G28000	3.77535	3.57662	3.92495	3.59776	4.11549	4.05711	3.82533	4.05065	3.73738	3.83325	4.00109	3.65162	3.94548	4.11373	3.52508	3.83372	4.27015	4.31293	4.65545	4.11447	3.94336	3.52983	3.97647	3.98631	0.170127	0.537105	-0.399868	0.235955	0.154659	0.255816	0.04998	0.47403	-0.18757	0.23549	-0.114401	-0.405494	0.709975	0.000744	0.418286	-0.303887	-0.293676	-0.326617	0.659995	-0.473286	0.605856	-0.539377	-0.179275	0.078877
13373203	AT1G28190	8.19947	8.11791	7.98905	7.49035	6.77565	6.72867	8.6759	8.45958	8.14854	7.88473	7.5589	7.95782	8.83564	8.04653	7.94031	8.01279	7.2738	7.63569	9.59066	9.07825	8.1798	8.78717	8.14712	8.58971	0.636174	-0.071381	-0.048744	0.522435	0.498151	0.907024	0.476432	0.341669	0.159483	0.394379	0.783256	1.22915	0.755011	1.03172	0.239493	0.774386	0.873323	0.95402	0.278579	0.69005	0.08001	0.380007	0.090067	-0.275133
13373213	AT1G28220	2.82807	2.92266	2.6072	2.91274	2.91825	2.67522	2.79538	2.85068	2.38772	2.54253	3.0022	2.6968	3.38683	3.18524	2.81816	2.77465	2.94881	2.95637	2.73499	3.03971	2.9576	2.98242	3.26495	3.22825	0.558759	0.262573	0.210955	-0.138086	0.030561	0.281146	-0.032684	-0.071977	-0.219483	-0.370209	0.08395	0.021579	-0.651833	-0.145527	0.139443	0.207772	0.316141	0.271876	-0.619149	-0.07355	0.358926	0.577981	0.232191	0.250297
13373342	AT1G28480	3.72133	3.75615	3.89836	3.63578	4.16791	4.24476	3.63325	3.76333	5.60147	5.39449	7.07765	7.52182	5.00826	5.75002	6.34711	6.15459	6.10188	6.23863	5.99537	6.36299	6.66352	7.00085	7.14787	7.03468	1.28694	1.99387	2.44875	2.51881	1.93397	1.99386	-0.088073	0.007187	1.70311	1.75871	2.90974	3.27706	0.987106	0.612973	0.316418	0.846262	1.04599	0.796054	1.07518	0.605786	-1.38669	-0.912446	-1.86375	-2.48101
13373466	AT1G28690	5.85443	6.17501	6.15736	6.1096	5.00883	5.37878	5.49401	6.27526	6.3206	6.29415	5.25102	6.02684	6.01088	5.827	6.32196	5.95316	5.20116	5.67378	4.99113	6.36283	6.1179	5.85984	5.55102	5.83296	0.156449	-0.348017	0.164598	-0.15644	0.192332	0.294995	-0.360424	0.100249	0.163237	0.184546	0.242187	0.648055	-1.01976	0.535837	-0.204056	-0.093323	0.349858	0.15918	-0.659333	0.435588	-0.367293	-0.277869	0.107671	-0.488875
13373906	AT1G29920	6.86177	6.7111	4.57466	3.28418	7.97545	8.17368	6.73626	5.68596	4.41792	3.0263	8.13787	7.10858	6.23009	6.38803	3.22796	4.16047	7.66309	7.53219	6.97806	5.52346	4.25246	3.18987	7.49483	6.92958	-0.631678	-0.323069	-1.34671	0.876288	-0.312359	-0.641494	-0.12551	-1.02514	-0.156742	-0.257884	0.162426	-1.0651	0.747974	-0.864577	1.0245	-0.970598	-0.168261	-0.602611	0.873484	0.160563	1.18124	-0.712714	-0.330687	0.462491
13374076	AT1G30370	5.00715	4.41728	3.78996	4.25731	3.90422	4.09088	5.23445	4.56265	3.56511	4.87631	4.51689	4.77941	6.08421	4.70258	4.37176	4.33796	4.69757	4.4772	5.43403	4.51823	4.38065	5.38832	4.7138	4.5678	1.07706	0.285296	0.581797	0.080659	0.793354	0.386315	0.227293	0.145367	-0.224851	0.619	0.612671	0.68853	-0.650186	-0.184348	0.008892	1.05035	0.016235	0.090597	-0.877479	-0.329715	0.233743	0.431351	-0.596436	-0.597933
13374859	AT1G32430	3.59078	4.00709	4.10306	3.88004	3.51036	4.19668	3.6211	4.54357	3.79107	3.45998	3.49028	4.05897	3.53254	4.37472	4.02452	3.71642	4.0383	3.78389	4.21498	4.07321	3.4842	4.06447	4.25758	3.73651	-0.058241	0.367629	-0.07854	-0.163615	0.527937	-0.412794	0.030316	0.536478	-0.31199	-0.420055	-0.020088	-0.137716	0.68244	-0.301504	-0.540318	0.348048	0.219283	-0.047377	0.652124	-0.837982	-0.228328	0.768103	0.239371	0.090339
13374940	AT1G32640	7.07643	7.22022	7.6421	6.85489	7.39335	7.62014	7.04598	7.37506	8.00885	8.0458	8.64913	9.14503	6.86668	6.96987	7.58981	7.21782	7.72379	8.02017	7.65723	7.75219	7.77994	8.34889	8.65494	9.00362	-0.209745	-0.25035	-0.052293	0.362921	0.330439	0.400029	-0.030445	0.154847	0.366747	1.1909	1.25578	1.52489	0.790544	0.78232	0.190136	1.13107	0.931148	0.983451	0.820989	0.627473	-0.176611	-0.059832	-0.324637	-0.541439
13374976	AT1G32770	4.15453	3.68344	3.59941	3.8595	3.71548	3.84642	3.99701	4.19779	3.53975	3.66934	3.82514	3.57508	4.73442	3.79369	4.48509	3.71939	3.78255	3.96617	4.0447	4.09704	4.19279	3.85737	3.7571	3.85737	0.579898	0.110249	0.885676	-0.140111	0.067065	0.119747	-0.157514	0.514347	-0.059658	-0.19016	0.109654	-0.271341	-0.689721	0.303349	-0.292301	0.137979	-0.02545	-0.108802	-0.532207	-0.210998	-0.232643	0.328139	-0.135104	0.162539
13375059	AT1G33030	4.34148	3.93779	3.19607	4.04284	4.03586	3.78003	4.44721	4.44347	4.73595	4.06956	4.84944	5.2009	5.51262	4.93234	4.68725	5.18309	4.74592	5.16175	6.72166	5.73104	5.78527	6.03736	5.54504	6.04821	1.17114	0.994541	1.49119	1.14024	0.710054	1.38172	0.105723	0.505673	1.53988	0.026714	0.813578	1.42087	1.20903	0.798704	1.09802	0.85427	0.799121	0.886454	1.10331	0.293031	-0.44186	0.827556	-0.014457	-0.534413
13375438	AT1G34310	4.07097	3.85577	2.87181	3.7935	3.84253	3.62005	3.7947	3.51718	3.93767	3.59017	3.28748	3.5652	4.7482	3.04074	3.63365	3.83082	3.68059	3.28598	4.01825	3.00041	3.51804	3.53297	4.44374	3.9169	0.677228	-0.815038	0.761838	0.037321	-0.161939	-0.334068	-0.276269	-0.33859	1.06585	-0.203324	-0.555051	-0.054852	-0.729946	-0.040324	-0.115608	-0.297847	0.763144	0.630917	-0.453677	0.298266	-1.18146	-0.094523	1.3182	0.685769
13375560	AT1G34810	4.92615	5.57741	5.81085	4.93114	5.25486	5.68682	4.47726	6.08804	4.34202	4.97111	5.68818	5.49605	4.44994	4.46271	3.75754	4.09378	4.24266	3.50916	3.54748	3.93231	3.59566	4.02376	3.53416	4.27119	-0.476209	-1.1147	-2.0533	-0.837353	-1.0122	-2.17766	-0.448893	0.510631	-1.46883	0.039973	0.433317	-0.190772	-0.902466	-0.5304	-0.16188	-0.070029	-0.7085	0.762031	-0.453573	-1.04103	1.30695	-0.110002	-1.14182	0.952803
13375562	AT1G34810	4.92615	5.57741	5.81085	4.93114	5.25486	5.68682	4.47726	6.08804	4.34202	4.97111	5.68818	5.49605	4.44994	4.46271	3.75754	4.09378	4.24266	3.50916	3.54748	3.93231	3.59566	4.02376	3.53416	4.27119	-0.476209	-1.1147	-2.0533	-0.837353	-1.0122	-2.17766	-0.448893	0.510631	-1.46883	0.039973	0.433317	-0.190772	-0.902466	-0.5304	-0.16188	-0.070029	-0.7085	0.762031	-0.453573	-1.04103	1.30695	-0.110002	-1.14182	0.952803
13375574	AT1G34840	4.89442	5.32579	5.74953	4.90267	5.18532	5.60494	4.39342	5.90796	4.25993	4.86375	5.61889	5.42676	4.34333	4.39342	3.79658	4.04078	4.10046	3.43988	3.50074	3.8314	3.51379	3.90689	3.50569	4.11359	-0.551095	-0.932366	-1.95295	-0.861894	-1.08486	-2.16507	-0.501001	0.582177	-1.4896	-0.03892	0.433566	-0.178183	-0.842588	-0.562025	-0.282792	-0.133885	-0.594773	0.673713	-0.341587	-1.1442	1.20681	-0.094965	-1.02834	0.851896
13375576	AT1G34840	4.89442	5.32579	5.74953	4.90267	5.18532	5.60494	4.39342	5.90796	4.25993	4.86375	5.61889	5.42676	4.34333	4.39342	3.79658	4.04078	4.10046	3.43988	3.50074	3.8314	3.51379	3.90689	3.50569	4.11359	-0.551095	-0.932366	-1.95295	-0.861894	-1.08486	-2.16507	-0.501001	0.582177	-1.4896	-0.03892	0.433566	-0.178183	-0.842588	-0.562025	-0.282792	-0.133885	-0.594773	0.673713	-0.341587	-1.1442	1.20681	-0.094965	-1.02834	0.851896
13375606	AT1G35240	3.56209	3.02043	3.66766	3.32758	3.58143	3.50067	3.70402	4.28316	3.34549	3.29806	3.86639	3.57615	3.68399	3.84808	3.73764	3.4908	3.89837	3.24074	4.60757	3.02488	3.71189	3.67704	3.34637	3.45608	0.1219	0.827653	0.069985	0.163216	0.316937	-0.259926	0.14193	1.26273	-0.322167	-0.02952	0.28496	0.075479	0.923579	-0.823201	-0.025747	0.18624	-0.551996	0.215336	0.781649	-2.08593	0.29642	0.21576	-0.836956	0.139857
13375629	AT1G35260	4.99009	5.38394	5.74295	6.24603	6.49503	7.22686	4.83503	4.95551	6.45864	6.8635	6.87451	6.99818	5.79843	5.8935	6.89537	6.4803	7.32307	6.8873	5.10543	5.81175	6.4328	7.34828	6.70575	6.44197	0.808338	0.509554	1.15243	0.234268	0.828045	-0.339561	-0.155058	-0.428431	0.715695	0.617472	0.379481	-0.228682	-0.692998	-0.081743	-0.462573	0.867976	-0.617326	-0.445328	-0.53794	0.346688	-1.17827	0.250504	-0.996807	-0.216646
13375666	AT1G35375	2.88902	3.9577	4.17396	3.54591	4.36573	3.61815	3.34547	4.69101	4.50767	3.27995	3.58899	4.74732	5.38693	5.63865	5.5838	5.71426	5.38839	5.6159	6.11065	4.95401	4.50426	5.37375	6.08693	5.61618	2.49791	1.68094	1.40984	2.16836	1.02266	1.99775	0.456452	0.733309	0.333702	-0.265959	-0.77674	1.12917	0.723717	-0.684631	-1.07954	-0.340509	0.698542	0.000278	0.267265	-1.41794	-1.41325	-0.07455	1.47528	-1.12889
13375795	AT1G36060	6.29309	6.84059	8.04692	6.17853	6.7607	3.71257	6.12904	7.73284	8.49211	6.23103	4.45956	3.55872	4.57825	6.75065	6.96486	5.61004	5.79422	4.45937	5.56676	6.84559	7.6741	5.24435	4.41604	4.01628	-1.71484	-0.08994	-1.08206	-0.568493	-0.96648	0.746801	-0.164052	0.892251	0.445192	0.052497	-2.30115	-0.153849	0.988509	0.094941	0.709244	-0.365694	-1.37818	-0.443088	1.15256	-0.79731	0.264052	-0.418191	0.922965	-0.289239
13375866	AT1G36640	3.49096	3.80032	2.93715	3.17545	3.52854	2.93505	3.8284	3.70024	4.99663	4.04239	3.79141	3.60027	5.49747	6.09371	5.88236	6.71781	5.98282	5.46473	6.26574	6.54939	6.6331	6.82228	6.6768	5.54827	2.00652	2.29339	2.94521	3.54235	2.45428	2.52968	0.337441	-0.100084	2.05948	0.866937	0.262874	0.665221	0.768269	0.455676	0.750739	0.104473	0.693975	0.083544	0.430828	0.55576	-1.30874	-0.762464	0.431101	-0.581677
13375916	AT1G37162	2.1703	2.18188	2.48205	2.29324	2.28551	2.31372	2.26972	3.01876	2.41769	2.06541	2.29982	2.17622	2.4306	2.71105	2.53148	3.00096	2.37405	2.74328	3.22844	2.08673	2.18141	2.1568	3.39118	2.10439	0.260301	0.529171	0.049436	0.707726	0.088543	0.429562	0.099416	0.836884	-0.064362	-0.227826	0.014311	-0.137499	0.79784	-0.624324	-0.350075	-0.844161	1.01713	-0.638894	0.698424	-1.46121	-0.285713	-0.616335	1.00282	-0.501395
13376049	AT1G43090	2.42695	2.95137	2.9662	3.11145	2.33419	2.79545	2.67906	2.57693	2.72887	2.86282	2.87026	2.51576	3.71713	2.61364	2.93625	3.38136	3.00341	2.61687	2.54252	2.38848	2.74363	2.65749	2.81338	2.91768	1.29018	-0.337731	-0.029954	0.269901	0.669216	-0.178578	0.252105	-0.374434	-0.237331	-0.248634	0.536065	-0.279689	-1.1746	-0.225156	-0.192623	-0.723866	-0.190028	0.300807	-1.42671	0.149278	0.044708	-0.475232	-0.726093	0.580496
13376085	AT1G43245	8.398	8.30219	8.22166	8.86076	8.33275	8.0744	8.78271	8.70002	8.2938	8.8148	8.31202	8.05926	7.36982	7.69234	7.75535	8.2756	8.10036	7.4371	8.00652	8.08128	7.93408	8.14674	7.70524	7.66651	-1.02817	-0.609852	-0.466307	-0.585158	-0.232389	-0.637303	0.384715	0.397828	0.072136	-0.045966	-0.020732	-0.015143	0.636703	0.388944	0.178727	-0.128868	-0.395119	0.229415	0.251988	-0.008884	0.106591	-0.082902	-0.374387	0.244558
13376224	AT1G44085	4.83576	4.60275	4.33131	5.21515	5.07784	5.42529	4.48838	5.69391	3.88551	4.53031	4.54757	4.4334	4.26558	4.5535	4.00745	5.0553	4.34324	3.86987	5.39936	3.96206	3.68925	3.98975	4.36361	3.77332	-0.570176	-0.049245	-0.323857	-0.159848	-0.734602	-1.55542	-0.34738	1.09117	-0.445795	-0.684834	-0.530274	-0.991884	1.13378	-0.59144	-0.3182	-1.06555	0.020363	-0.096548	1.48116	-1.68261	0.127595	-0.380714	0.550637	0.895336
13376373	AT1G44941	3.17034	3.9453	4.44102	4.00258	3.33376	3.99554	3.57447	4.23499	4.20593	3.81977	4.05267	4.0244	6.05346	6.06933	5.7855	5.49934	5.09843	4.53	6.94271	5.76421	5.5238	4.86125	5.56601	4.72832	2.88312	2.12403	1.34448	1.49676	1.76467	0.534454	0.404136	0.289691	-0.235087	-0.182812	0.718909	0.028854	0.889251	-0.305121	-0.261709	-0.63809	0.467586	0.198324	0.485115	-0.594812	-0.026622	-0.455278	-0.251323	0.16947
13376528	AT1G45616	4.96306	5.20673	5.22371	5.32491	5.19695	5.67083	5.03808	4.6017	5.29988	5.25021	5.8882	6.01927	5.86941	5.66036	5.39679	5.40819	5.72077	5.38903	5.05511	5.26696	5.29445	4.78505	5.54306	5.03245	0.906344	0.453634	0.173078	0.083278	0.523818	-0.2818	0.075022	-0.605033	0.076176	-0.074698	0.691255	0.348446	-0.81429	-0.3934	-0.102338	-0.623145	-0.177706	-0.356576	-0.889312	0.211633	-0.178514	-0.548447	-0.868961	-0.705022
13376854	AT1G48145	3.12182	4.13324	2.84257	2.57147	2.80397	3.72941	3.20898	2.95754	3.59459	3.76407	2.68791	4.10032	3.44525	2.89222	3.10053	3.45891	3.54336	2.51859	2.65512	3.80732	3.12149	3.85979	4.6253	3.57899	0.323432	-1.24102	0.25796	0.887444	0.739391	-1.21082	0.087166	-1.1757	0.752022	1.1926	-0.116061	0.370914	-0.790127	0.915109	0.020962	0.400879	1.08194	1.06039	-0.877293	2.09081	-0.73106	-0.791722	1.198	0.689481
13377092	AT1G48605	7.32759	7.21724	7.18173	7.31522	7.04762	7.27933	7.81536	7.41344	7.62753	7.26245	7.50856	8.84222	7.78539	7.82859	8.26417	8.14118	7.90275	8.29014	8.54219	8.45595	8.24266	8.58348	8.49217	8.689	0.457803	0.61135	1.08244	0.82596	0.855129	1.0108	0.487774	0.196196	0.445799	-0.052774	0.460938	1.56288	0.756801	0.627365	-0.021512	0.442294	0.589416	0.39886	0.269027	0.431169	-0.467311	0.495068	0.128478	-1.16402
13377569	AT1G49790	3.4433	3.66016	3.40014	3.62062	3.48413	3.50524	3.41687	3.47312	3.37112	3.74519	3.71802	3.53835	4.49504	4.04214	4.23774	4.08314	3.9123	4.02329	3.62062	3.82739	3.98811	4.00163	3.50198	3.54561	1.05175	0.381977	0.8376	0.462526	0.428174	0.51805	-0.026423	-0.187044	-0.029018	0.124568	0.233891	0.033107	-0.874426	-0.21475	-0.24963	-0.081512	-0.410321	-0.477678	-0.848003	-0.027706	-0.220612	-0.20608	-0.644212	-0.510785
13377808	AT1G50220	2.71631	2.99581	2.59608	3.25299	2.89922	2.98325	2.51331	3.23065	2.90282	2.67033	3.05853	2.72996	4.45688	4.08224	3.45315	4.93376	5.13239	4.86458	3.57855	3.00517	3.30225	4.78861	4.616	4.00304	1.74057	1.08643	0.857069	1.68077	2.23317	1.88132	-0.202999	0.234845	0.306746	-0.582658	0.159305	-0.253294	-0.878332	-1.07707	-0.150896	-0.145144	-0.516389	-0.861539	-0.675333	-1.31192	-0.457642	0.437514	-0.675694	-0.608245
13378021	AT1G50760	3.59201	3.11472	3.82396	3.19342	3.17624	3.76588	3.67553	3.43156	3.65059	3.51681	3.92758	3.31437	3.64906	4.03667	3.61736	3.85837	3.71658	3.58594	4.30619	3.67761	4.166	3.57028	3.32364	3.416	0.057053	0.921949	-0.206595	0.664953	0.540339	-0.179944	0.083518	0.316842	-0.173367	0.32339	0.751338	-0.451509	0.657124	-0.359056	0.548634	-0.288089	-0.392932	-0.169938	0.573606	-0.675898	0.722001	-0.611479	-1.14427	0.281571
13378024	AT1G50770	3.79097	4.19822	4.24424	4.64985	3.41844	4.75098	3.81005	4.16125	3.87025	4.38333	4.06296	4.56294	4.7516	4.36614	4.13949	4.51196	4.64479	4.35628	3.77324	4.36099	4.1736	4.11507	4.13476	4.16972	0.96063	0.167917	-0.104751	-0.137881	1.22636	-0.3947	0.019074	-0.03697	-0.373991	-0.266518	0.64452	-0.188046	-0.978361	-0.005149	0.034112	-0.396891	-0.510029	-0.186558	-0.997435	0.031821	0.408103	-0.130373	-1.15455	0.001488
13378032	AT1G50820	3.60967	3.42468	2.83164	2.68446	2.70363	3.23614	3.16425	3.38698	2.90833	3.16425	2.76444	2.99429	3.57163	3.57163	3.22499	3.65774	3.16455	3.11088	2.58733	2.94799	3.4393	2.92297	2.94622	3.14494	-0.03804	0.146949	0.393341	0.973275	0.460924	-0.125265	-0.445418	-0.037708	0.076685	0.47979	0.06082	-0.24185	-0.984305	-0.623648	0.214311	-0.734775	-0.218326	0.034065	-0.538887	-0.58594	0.137626	-1.21456	-0.279146	0.275915
13378362	AT1G51840	3.4829	3.63331	3.48732	3.92311	3.11909	3.11873	3.11146	3.16706	3.05773	2.88457	3.41124	3.14007	3.38121	3.22545	3.01948	3.44676	3.35836	3.31245	4.10488	3.19372	3.30068	3.05693	3.64773	3.21014	-0.101692	-0.407862	-0.467845	-0.476348	0.239272	0.193716	-0.371435	-0.466256	-0.429594	-1.03853	0.292153	0.021341	0.723671	-0.031729	0.281202	-0.389826	0.289374	-0.102308	1.09511	0.434527	0.710796	0.648709	-0.002779	-0.123649
13378632	AT1G52290	9.83219	8.76258	8.69121	9.56219	9.52888	9.37669	9.60649	8.65399	8.68177	9.57117	10.0818	10.1601	7.43527	6.65962	6.30309	7.86916	7.20579	7.06149	6.68149	5.25345	6.35753	7.36067	7.33215	6.88169	-2.39692	-2.10296	-2.38813	-1.69303	-2.32309	-2.31521	-0.225698	-0.108588	-0.00944	0.008978	0.552889	0.78341	-0.753788	-1.40617	0.054439	-0.508489	0.126365	-0.179799	-0.52809	-1.29758	0.063879	-0.517467	-0.426524	-0.963209
13378927	AT1G53100	6.137	7.19126	6.23978	3.89114	5.5746	6.35911	6.70844	7.26575	6.50428	4.27024	5.40387	7.17664	6.51104	7.68326	7.41856	5.39081	6.5413	7.34663	7.31012	8.05424	7.50477	5.39598	6.82897	7.96775	0.374041	0.491997	1.17877	1.49967	0.9667	0.987513	0.571444	0.074487	0.264494	0.379099	-0.170731	0.817532	0.79908	0.37098	0.086218	0.005173	0.287675	0.621127	0.227636	0.296493	-0.178276	-0.373926	0.458406	-0.196405
13379023	AT1G53325	2.13632	2.59426	2.41298	2.85551	3.22096	2.33067	2.18944	2.41315	2.46883	3.17228	2.95339	2.52286	2.56206	2.61327	2.477	2.27614	2.64342	2.6529	3.36194	2.45055	2.55939	2.39968	2.35347	2.6753	0.425744	0.019007	0.064019	-0.579369	-0.577537	0.322238	0.053129	-0.181111	0.055856	0.31677	-0.267562	0.192194	0.799884	-0.162715	0.082395	0.123539	-0.289951	0.022392	0.746755	0.018396	0.026539	-0.193231	-0.022389	-0.169802
13379613	AT1G54620	2.72921	2.61711	2.8862	3.21094	2.59524	2.59924	2.61768	2.77374	3.01066	2.83106	2.74434	3.0341	2.48182	3.48775	3.47213	2.7527	2.49666	2.6433	3.13593	2.55838	2.93165	2.41378	3.13887	2.59918	-0.247398	0.870638	0.585928	-0.458245	-0.098579	0.044063	-0.11154	0.156623	0.124454	-0.379879	0.149102	0.434869	0.654117	-0.929374	-0.540482	-0.338921	0.642207	-0.044121	0.765657	-1.086	-0.664936	0.040958	0.493105	-0.47899
13379622	AT1G54640	3.30213	4.28511	3.87038	3.62789	3.66025	4.08874	3.68548	3.59816	3.70839	3.92656	3.50061	3.8231	4.49988	4.41281	3.91983	3.93215	3.71598	3.5699	3.80714	3.85777	4.32867	4.01105	3.82482	4.11847	1.19774	0.127703	0.049455	0.304265	0.055727	-0.518845	0.383346	-0.686946	-0.161981	0.298678	-0.159641	-0.265646	-0.692737	-0.555039	0.408843	0.078904	0.108834	0.548575	-1.07608	0.131907	0.570824	-0.219774	0.268475	0.814221
13379826	AT1G55390	4.00557	4.43418	3.80228	4.84621	3.62173	4.19723	4.19472	4.59343	4.28118	4.61099	3.16603	3.7434	4.39384	3.96232	3.78996	3.83189	3.62059	3.83131	3.5033	3.77549	4.30118	3.7588	4.6016	3.12958	0.388268	-0.471862	-0.012315	-1.01432	-0.001133	-0.365922	0.189152	0.159243	0.478901	-0.235211	-0.455701	-0.453832	-0.890535	-0.186829	0.511215	-0.073088	0.981002	-0.701732	-1.07969	-0.346072	0.032314	0.162123	1.4367	-0.2479
13379924	AT1G55610	4.62919	4.28766	4.34306	4.55654	3.81928	3.98318	4.75437	4.85506	4.4902	4.60796	4.66158	4.86906	4.82636	4.90014	4.64297	5.04021	4.00493	4.39588	4.10064	4.86115	4.58748	4.62254	4.0256	4.49302	0.197168	0.612479	0.299912	0.48368	0.185649	0.412702	0.125182	0.5674	0.14714	0.051429	0.842297	0.885887	-0.725718	-0.038992	-0.055497	-0.417671	0.020671	0.097138	-0.8509	-0.606392	-0.202637	-0.4691	-0.821626	-0.788749
13380146	AT1G55980	3.87605	3.07404	3.71364	3.07088	4.1654	4.24157	3.79464	3.64439	3.58589	3.72714	3.77279	3.60784	3.29305	3.80745	4.49109	3.98186	4.39986	4.7239	4.24757	4.03283	3.64559	4.08854	4.24805	3.71742	-0.583004	0.73341	0.777451	0.910986	0.234459	0.482331	-0.081408	0.570346	-0.12775	0.656264	-0.392612	-0.633724	0.954521	0.225382	-0.845497	0.106675	-0.151806	-1.00648	1.03593	-0.344964	-0.717747	-0.549589	0.240806	-0.372751
13380182	AT1G56060	7.97715	6.22109	6.00865	6.44977	5.87559	6.19831	7.80493	6.29329	6.49425	6.73432	6.52426	7.50532	9.71032	8.02324	7.13744	8.01865	7.18017	8.00772	10.3443	9.03041	7.36044	7.73733	7.43626	8.29966	1.73317	1.80215	1.12879	1.56888	1.30457	1.80941	-0.172223	0.072195	0.485604	0.284556	0.648662	1.30702	0.63395	1.00716	0.222999	-0.281318	0.256091	0.291942	0.806173	0.934969	-0.262605	-0.565874	-0.392571	-1.01507
13380414	AT1G56400	3.57597	2.93521	3.2769	3.23448	3.20627	3.32516	3.39541	3.21897	2.85004	2.93421	3.14301	3.28388	4.01734	3.80107	3.36307	3.8196	3.29779	3.11157	3.21487	3.15683	3.12821	3.42289	2.79577	3.25764	0.441368	0.865857	0.08617	0.585122	0.091514	-0.213588	-0.180565	0.283762	-0.426858	-0.300264	-0.063259	-0.041281	-0.802466	-0.644242	-0.234854	-0.396709	-0.50202	0.146065	-0.621901	-0.928004	0.192004	-0.096445	-0.438761	0.187346
13380448	AT1G56550	6.64597	6.36097	6.59001	6.31057	5.22338	5.91897	7.02769	7.00968	8.10302	6.89558	7.34427	8.03278	8.46752	9.30068	9.46525	8.74045	9.1266	9.52408	9.35974	9.53514	9.45518	9.03811	9.57946	9.5776	1.82155	2.93971	2.87524	2.42988	3.90321	3.60511	0.381718	0.648711	1.51301	0.585003	2.12089	2.11382	0.892216	0.234462	-0.010065	0.297654	0.452868	0.053521	0.510498	-0.414249	-1.52308	-0.287349	-1.66802	-2.06029
13380652	AT1G57943	4.35063	4.84291	4.68365	4.92347	4.08033	3.92423	4.9116	4.9814	4.77794	4.54444	4.45327	4.68134	5.88032	6.76721	6.48679	6.16219	5.44182	5.06337	7.10992	6.83327	6.23926	6.28749	6.03677	5.05268	1.52969	1.9243	1.80314	1.23872	1.36149	1.13913	0.560968	0.138493	0.094282	-0.37904	0.372939	0.757104	1.2296	0.066057	-0.247528	0.1253	0.594943	-0.010683	0.668634	-0.072436	-0.34181	0.50434	0.222004	-0.767787
13381044	AT1G59630	3.69888	2.9912	4.12606	3.13914	3.55141	3.79253	3.17591	4.43599	3.12091	2.82942	3.218	3.33059	4.03087	3.56713	2.9422	3.77403	2.72981	3.01408	2.76495	3.09858	3.03876	2.59845	3.43256	2.69773	0.331987	0.575936	-1.18386	0.634889	-0.821598	-0.778449	-0.522971	1.44479	-1.00515	-0.309717	-0.33341	-0.46194	-1.26592	-0.468555	0.096563	-1.17558	0.70275	-0.316348	-0.742946	-1.91334	1.10171	-0.865862	1.03616	0.145592
13381300	AT1G60300	2.88456	2.35769	3.63883	2.93437	3.72432	3.811	2.45235	2.83855	2.57539	2.80802	3.238	2.75533	3.08402	2.85537	2.37273	2.58464	2.89322	2.48047	2.30978	2.65415	2.50769	2.78753	2.71635	2.73686	0.19946	0.497682	-1.26609	-0.34973	-0.831104	-1.33053	-0.432203	0.480854	-1.06344	-0.12635	-0.486321	-1.05566	-0.774242	-0.201226	0.134956	0.202894	-0.176871	0.256392	-0.342039	-0.68208	1.19839	0.329244	0.30945	1.31206
13381493	AT1G60730	8.38163	8.28042	8.16526	8.64858	8.25638	8.15326	8.70227	8.65891	8.68531	9.10081	8.78044	9.18842	9.10932	8.68407	8.67745	9.06187	8.71967	9.0264	9.79337	9.43109	9.08389	9.75191	9.22937	9.81424	0.727695	0.403648	0.512191	0.413293	0.463295	0.873144	0.320639	0.378491	0.520054	0.452229	0.524065	1.03517	0.684051	0.747017	0.406437	0.690037	0.509695	0.787839	0.363412	0.368526	-0.113617	0.237808	-0.01437	-0.247328
13381502	AT1G60750	3.51957	3.26625	3.47829	3.0493	3.97619	3.63545	3.31826	3.16744	3.81691	2.69444	3.60085	3.05769	2.86865	3.59856	3.29555	3.4197	3.56284	3.58364	4.33709	3.98696	4.17498	4.15066	3.9853	3.83029	-0.650923	0.332308	-0.182742	0.370399	-0.413346	-0.05182	-0.201314	-0.098811	0.338618	-0.354862	-0.375342	-0.577762	1.46845	0.388399	0.879427	0.730959	0.422461	0.246654	1.66976	0.48721	0.540809	1.08582	0.797803	0.824416
13381527	AT1G60790	9.20154	9.0464	9.03261	9.16515	9.27994	9.49462	9.11459	8.7875	8.54707	8.9857	9.23074	9.4052	7.86094	7.60661	7.49172	7.36333	7.82749	8.09129	7.02349	7.26157	7.35155	7.25994	7.81364	7.69763	-1.34061	-1.43979	-1.54089	-1.80183	-1.45245	-1.40333	-0.086951	-0.258904	-0.485539	-0.179458	-0.049195	-0.089419	-0.837449	-0.345038	-0.14017	-0.103388	-0.013851	-0.393658	-0.750498	-0.086134	0.345369	0.07607	0.035344	-0.304239
13381848	AT1G61353	4.84358	5.78466	5.02199	4.87185	5.37528	4.92208	4.67006	5.30438	4.9115	4.30839	4.799	5.16944	4.33425	4.49605	4.80642	4.11862	4.70155	4.59772	5.5584	4.78055	4.54201	4.52611	4.58272	4.2135	-0.509325	-1.2886	-0.215577	-0.753225	-0.673738	-0.324352	-0.173517	-0.480271	-0.110494	-0.563456	-0.576288	0.247359	1.22415	0.284495	-0.264403	0.407483	-0.118821	-0.384223	1.39767	0.764766	-0.153909	0.970939	0.457467	-0.631582
13381883	AT1G61390	4.22412	3.98521	4.26644	4.39223	3.98339	3.95617	3.77816	3.83888	4.28485	4.2367	3.94963	3.6946	5.13201	4.91376	4.35244	4.66913	4.74029	4.37882	4.40361	4.64146	4.36966	4.87805	4.4962	4.30025	0.907893	0.92855	0.085999	0.2769	0.756896	0.42265	-0.445962	-0.146328	0.01841	-0.155539	-0.03377	-0.261572	-0.728401	-0.2723	0.017216	0.208921	-0.244094	-0.078569	-0.282439	-0.125972	-0.001194	0.36446	-0.210324	0.183003
13381894	AT1G61400	2.9702	2.89087	2.48745	3.18863	2.70319	2.86565	2.67396	2.7688	3.7048	2.95339	2.77582	2.64112	2.96718	2.60349	3.87473	4.16221	3.28471	2.51788	3.69466	3.45344	3.88621	3.34951	3.26174	2.56031	-0.003026	-0.287378	1.38728	0.973575	0.581518	-0.347772	-0.296241	-0.122072	1.21735	-0.235239	0.072627	-0.224532	0.72748	0.849946	0.011481	-0.812695	-0.022971	0.042435	1.02372	0.972018	-1.20587	-0.577456	-0.095598	0.266967
13381958	AT1G61490	5.17531	4.60963	5.7517	5.93542	5.33446	4.36387	5.46389	5.53078	5.91018	6.22855	5.64717	5.15896	5.41466	6.43285	6.29588	6.44887	5.79098	6.16875	6.28353	6.49935	6.65254	6.66644	6.34	6.41855	0.239342	1.82322	0.544181	0.513444	0.456517	1.80488	0.288574	0.921145	0.158481	0.293124	0.312703	0.795088	0.868879	0.0665	0.356666	0.217578	0.549018	0.2498	0.580305	-0.854645	0.198185	-0.075546	0.236315	-0.545288
13382163	AT1G62085	5.91446	5.5173	5.89964	5.85515	6.09183	6.35444	5.87966	6.21334	5.59702	6.2951	6.49755	5.87503	5.48989	5.37627	5.04198	5.25541	5.36226	5.04415	4.20991	4.81485	5.24791	5.01948	5.32902	4.96884	-0.424569	-0.141031	-0.857669	-0.599735	-0.729572	-1.3103	-0.034796	0.696046	-0.302621	0.439951	0.405717	-0.479412	-1.27998	-0.56142	0.205935	-0.235935	-0.033239	-0.075302	-1.24518	-1.25747	0.508556	-0.675886	-0.438956	0.40411
13382329	AT1G62422	7.67301	6.92622	7.43438	7.0601	7.4089	6.97291	7.64527	6.78758	7.20029	7.86115	7.11148	7.31215	5.17727	5.2452	4.84019	4.82924	4.74165	4.05449	4.33934	4.25979	4.90977	5.09931	4.74409	4.75138	-2.49574	-1.68102	-2.59419	-2.23086	-2.66724	-2.91842	-0.027736	-0.138641	-0.234087	0.801049	-0.297421	0.339237	-0.837935	-0.985407	0.069578	0.270066	0.002438	0.696893	-0.810199	-0.846766	0.303665	-0.530983	0.299859	0.357656
13382383	AT1G62670	6.83022	7.13055	7.05051	7.01583	6.98305	7.39745	6.80192	7.56256	6.54525	7.18455	7.1418	7.17812	6.21278	5.77354	5.55436	4.76389	4.91548	5.56457	4.37543	4.93566	5.18856	5.14183	5.73568	5.43023	-0.617437	-1.35701	-1.49615	-2.25195	-2.06756	-1.83289	-0.028306	0.432011	-0.50526	0.168718	0.158751	-0.219331	-1.83736	-0.83788	-0.365796	0.377943	0.820198	-0.134343	-1.80905	-1.26989	0.139464	0.209225	0.661447	0.084988
13382422	AT1G62760	7.72446	7.90279	7.56236	6.69505	7.43463	6.5621	7.72526	8.418	9.06478	7.02842	7.54731	8.6391	8.11667	9.00924	9.48525	8.76416	8.71074	7.41013	8.91348	9.90349	10.638	9.06419	8.13916	10.1017	0.392211	1.10645	1.92289	2.06911	1.27611	0.848028	0.000803	0.515212	1.50242	0.333364	0.112676	2.077	0.796807	0.894242	1.15271	0.300027	-0.571583	2.69158	0.796004	0.37903	-0.349704	-0.033337	-0.684259	0.614583
13382626	AT1G63250	4.96977	5.51991	5.47231	4.61832	4.24019	4.53284	4.99727	4.92778	5.12864	5.22014	4.41575	4.10569	5.44302	5.39171	5.35833	4.42428	4.17321	4.98267	4.46115	5.80623	5.62989	4.63023	4.62122	5.29388	0.473246	-0.128194	-0.113981	-0.194036	-0.066977	0.449828	0.027495	-0.592128	-0.343673	0.601824	0.175561	-0.427154	-0.981867	0.414516	0.271563	0.205949	0.448006	0.311206	-1.00936	1.00664	0.615236	-0.395875	0.272445	0.73836
13382758	AT1G63535	4.50358	4.50413	4.97137	4.93926	4.50745	4.88733	4.292	5.90487	4.44979	4.41134	4.38244	4.77872	4.86364	5.10724	4.79601	4.85975	4.76798	4.63441	5.62152	4.54166	4.39672	4.33732	4.95806	4.66642	0.360061	0.603111	-0.175354	-0.079506	0.260525	-0.252922	-0.211577	1.40075	-0.521577	-0.527912	-0.12501	-0.108607	0.757881	-0.565579	-0.399296	-0.522433	0.190086	0.032014	0.969458	-1.96633	0.122281	0.005479	0.315096	0.140621
13382828	AT1G63720	6.21895	5.11433	5.00865	4.68486	5.41808	5.09243	6.29346	5.26502	5.65716	5.14528	5.73212	6.29832	6.29576	5.83681	5.52481	5.76151	5.53736	5.85517	7.04625	6.55622	5.98685	6.15993	5.74368	6.41317	0.07681	0.722477	0.516155	1.07664	0.119279	0.762738	0.074516	0.150683	0.648504	0.460414	0.31404	1.20589	0.75049	0.719414	0.462038	0.398419	0.206323	0.558007	0.675974	0.568731	-0.186466	-0.061995	-0.107717	-0.647885
13382917	AT1G63820	4.11791	3.55769	3.57517	3.59453	3.50614	3.54809	3.96558	3.69334	3.60721	3.50788	3.38417	3.61415	4.4061	3.63768	3.68472	4.16467	3.79274	3.83005	5.58419	3.70919	3.84505	3.98511	3.81623	3.74082	0.288199	0.079992	0.109551	0.570142	0.286604	0.281958	-0.152325	0.135645	0.032041	-0.086652	-0.121964	0.066058	1.17809	0.071504	0.160332	-0.179566	0.023493	-0.089231	1.33041	-0.064141	0.128291	-0.092914	0.145457	-0.155289
13382924	AT1G63840	6.25464	6.46243	6.56262	5.99509	6.58869	6.67896	6.62639	6.27363	6.81452	5.98796	7.07932	7.84429	6.42343	6.58003	6.65681	6.12437	7.04988	7.60702	7.49909	7.48457	7.12691	6.58714	7.79287	8.33267	0.168791	0.117601	0.094188	0.129278	0.461191	0.928065	0.371751	-0.188794	0.251894	-0.007128	0.490632	1.16533	1.07566	0.904538	0.470098	0.462771	0.742994	0.725646	0.703904	1.09333	0.218204	0.469899	0.252362	-0.439685
13382938	AT1G63860	8.21116	7.67317	7.58705	7.60751	7.39702	7.62462	8.0812	8.08722	7.8793	8.05505	8.03132	7.83819	4.63182	4.10178	3.91271	4.15983	3.89017	3.94841	3.72969	4.20198	3.97329	4.37054	3.902	3.97511	-3.57934	-3.57139	-3.67434	-3.44768	-3.50685	-3.67622	-0.129959	0.414053	0.292251	0.447535	0.634302	0.21357	-0.902134	0.100193	0.060579	0.210717	0.011835	0.026704	-0.772175	-0.31386	-0.231672	-0.236818	-0.622467	-0.186866
13382961	AT1G63910	3.56973	3.1836	3.06743	3.24107	2.9219	3.12276	3.68333	3.29192	3.22377	3.01914	3.00572	3.37124	3.77969	3.15065	3.17437	3.33961	3.51735	3.09138	3.07469	2.99653	3.46113	3.39338	3.61991	3.14719	0.209966	-0.032958	0.106944	0.09854	0.595458	-0.031382	0.113609	0.108313	0.156344	-0.221935	0.083821	0.248481	-0.705003	-0.154118	0.286756	0.053765	0.102554	0.055809	-0.818612	-0.262431	0.130412	0.2757	0.018733	-0.192672
13383065	AT1G64220	7.62988	8.41724	8.13508	8.37058	6.63711	7.30921	7.28175	8.10082	8.24226	7.67589	6.63766	6.60569	7.49797	8.84183	8.45492	8.11296	7.35928	7.2321	6.18476	8.30162	8.17414	7.19765	7.50486	7.44587	-0.131917	0.424598	0.319838	-0.257617	0.72217	-0.077107	-0.348131	-0.316416	0.10718	-0.694685	0.000557	-0.703523	-1.31321	-0.540213	-0.280772	-0.915308	0.145585	0.213766	-0.965079	-0.223797	-0.387952	-0.220623	0.145028	0.917289
13383077	AT1G64295	2.70632	2.95633	2.99288	3.20028	2.69294	3.46308	2.70632	3.39883	2.89728	2.63596	2.6387	2.83286	3.94382	3.40583	2.9202	2.73563	2.76687	3.28744	2.91194	3.25036	2.87424	3.10185	2.61905	2.91114	1.2375	0.449495	-0.072682	-0.464644	0.07393	-0.175642	0	0.442501	-0.095601	-0.564313	-0.054246	-0.630221	-1.03188	-0.155467	-0.045955	0.366221	-0.147821	-0.376306	-1.03188	-0.597968	0.049646	0.930534	-0.093575	0.253915
13383099	AT1G64450	7.55108	7.10032	6.90055	7.5643	7.59626	6.98601	7.16371	7.46598	6.78502	7.1927	7.11259	6.61768	7.3704	6.90742	6.67589	6.91764	7.14435	6.85454	6.65402	6.79848	7.42045	6.91019	7.07078	7.16558	-0.180687	-0.192901	-0.22466	-0.64666	-0.451909	-0.13147	-0.38738	0.365662	-0.115526	-0.371599	-0.483672	-0.368331	-0.716379	-0.108937	0.74456	-0.007451	-0.073566	0.311043	-0.328999	-0.474599	0.860086	0.364148	0.410106	0.679374
13383656	AT1G65690	6.44412	5.82666	5.65905	5.60338	6.04523	6.2611	6.52581	6.64637	7.13779	6.30872	6.81929	7.84025	7.26425	7.38101	7.35241	6.92406	7.36785	7.80936	8.07739	8.04496	7.24096	7.46469	8.09703	8.82428	0.82013	1.55435	1.69336	1.32068	1.32262	1.54826	0.081689	0.819712	1.47874	0.705345	0.77406	1.57915	0.813141	0.663956	-0.111457	0.540634	0.729186	1.01492	0.731452	-0.155756	-1.5902	-0.164711	-0.044874	-0.564223
13383786	AT1G65980	9.45043	9.89224	9.56515	9.12388	9.58361	10.1898	9.89723	9.55236	9.81397	9.27117	10.0298	10.1558	6.81775	6.94742	6.94742	7.59841	6.77651	7.2799	8.58641	7.07971	8.21332	7.18709	6.99109	7.26659	-2.63268	-2.94483	-2.61774	-1.52548	-2.8071	-2.90989	0.446799	-0.339886	0.248824	0.147286	0.446194	-0.03396	1.76866	0.132291	1.26591	-0.411321	0.214585	-0.013306	1.32186	0.472177	1.01708	-0.558607	-0.231609	0.020654
13384186	AT1G67040	6.42746	6.22076	6.5874	6.81818	6.72411	6.45175	6.28909	6.33894	6.0081	6.60503	6.4669	5.91985	6.9616	6.88909	6.89522	7.21231	7.47996	6.88864	6.30787	6.51308	6.50174	6.76725	7.06416	6.67881	0.534132	0.668331	0.307818	0.394133	0.755847	0.436892	-0.138373	0.11818	-0.579303	-0.213148	-0.257215	-0.531898	-0.653724	-0.376011	-0.393485	-0.445056	-0.415802	-0.209827	-0.515351	-0.494191	0.185818	-0.231908	-0.158587	0.322071
13384540	ATH-MIR83	4.14321	4.43981	4.64643	4.63738	4.51324	4.94092	4.63108	4.60004	4.42482	5.02289	4.57144	4.67991	5.15469	4.65954	4.98636	5.19833	4.65954	5.13384	4.90892	4.54841	4.65085	5.12477	4.6945	4.59316	1.01148	0.219731	0.339926	0.560951	0.146296	0.192919	0.487866	0.160235	-0.221612	0.385511	0.058202	-0.261005	-0.245773	-0.111127	-0.335503	-0.073558	0.034958	-0.54067	-0.733639	-0.271362	-0.113891	-0.459069	-0.023244	-0.279665
13384654	AT1G67650	5.7291	5.85423	5.44092	5.03901	5.97312	5.50254	5.37045	6.07721	6.0735	5.20319	5.94919	5.90819	5.88629	6.70424	6.80623	6.09315	6.42478	6.15994	6.5279	6.75779	6.39747	6.13661	6.35895	6.85127	0.157191	0.850006	1.36531	1.05414	0.451654	0.6574	-0.358643	0.222974	0.632581	0.164187	-0.023937	0.405649	0.641616	0.053553	-0.408762	0.043459	-0.06583	0.691328	1.00026	-0.169421	-1.04134	-0.120728	-0.041893	0.285679
13384818	AT1G68120	5.21956	4.79742	4.75597	4.96411	5.05669	4.94596	4.93469	4.4331	4.74505	4.99089	4.62838	4.78452	3.95167	4.7188	4.95683	4.9306	5.00823	4.74333	4.96881	4.49479	4.54933	4.21627	4.38278	4.50403	-1.26789	-0.07862	0.200863	-0.033507	-0.048461	-0.202631	-0.284872	-0.364323	-0.010916	0.026776	-0.428317	-0.161438	1.01714	-0.224016	-0.407498	-0.714337	-0.625447	-0.239299	1.30202	0.140307	-0.396582	-0.741113	-0.19713	-0.077861
13385275	AT1G69230	4.25706	4.04813	3.8498	4.59492	4.10487	4.46233	4.35683	4.80546	4.13298	4.19219	4.29483	4.36167	4.19056	4.2362	4.11506	5.21282	4.809	4.27586	4.84186	4.15454	4.32337	4.47973	4.32867	4.2552	-0.066504	0.18807	0.26526	0.617902	0.70413	-0.18647	0.099767	0.757331	0.283185	-0.402734	0.189964	-0.100652	0.651306	-0.081666	0.208314	-0.733093	-0.480327	-0.020654	0.551539	-0.838997	-0.074871	-0.330359	-0.670291	0.079998
13385282	AT1G69240	3.05096	2.97609	4.01945	3.26085	3.22689	2.98504	3.32291	3.19214	3.25671	2.97901	3.12128	3.03185	4.20039	3.47916	3.93106	3.05222	3.39111	3.34144	3.33246	3.16287	3.23766	3.27415	3.32779	3.51308	1.14943	0.503074	-0.088394	-0.208624	0.164225	0.356392	0.271952	0.21605	-0.762746	-0.28183	-0.10561	0.04681	-0.867936	-0.316287	-0.693396	0.221931	-0.063322	0.171644	-1.13989	-0.532337	0.06935	0.503761	0.042288	0.124834
13385538	AT1G69920	3.82539	3.21355	3.42158	3.33506	3.41837	3.51179	3.62868	3.45381	3.5059	3.55066	3.31825	3.58051	4.7914	4.17459	4.06114	4.8235	4.57809	4.31008	6.09994	4.97386	4.76109	6.82724	4.32959	6.92316	0.966012	0.961041	0.639553	1.48844	1.15973	0.798293	-0.196711	0.240257	0.084322	0.215595	-0.100115	0.068725	1.30854	0.799267	0.699951	2.00374	-0.248504	2.61308	1.50525	0.55901	0.615629	1.78814	-0.148389	2.54436
13385542	AT1G69930	4.49693	4.33673	4.26659	4.30521	4.8166	4.17677	4.52615	4.59381	4.52091	4.6387	5.91732	7.8535	5.59552	4.80991	5.40103	5.94687	5.55706	6.30019	6.85987	5.80691	5.52904	8.29517	8.251	8.86655	1.0986	0.473175	1.13443	1.64165	0.740462	2.12342	0.029227	0.257079	0.254314	0.333487	1.10072	3.67673	1.26435	0.997007	0.128014	2.34831	2.69394	2.56636	1.23512	0.739928	-0.1263	2.01482	1.59322	-1.11038
13385909	AT1G71000	4.00137	5.62034	5.23636	3.7359	3.64055	3.6457	4.20599	5.0158	5.09774	3.54922	3.57856	3.41693	3.67794	4.93659	4.83806	4.32602	3.65726	4.06199	4.44837	5.09331	5.11171	4.07056	3.51602	3.38041	-0.323436	-0.683753	-0.398293	0.590116	0.016709	0.41629	0.204616	-0.604539	-0.138612	-0.186684	-0.061996	-0.228773	0.770436	0.156724	0.273644	-0.25546	-0.141236	-0.68158	0.56582	0.761263	0.412256	-0.068776	-0.07924	-0.452807
13386049	AT1G71370	4.04078	3.6629	3.41499	3.59699	3.56088	3.34081	3.88036	3.93561	3.44151	3.34743	3.53368	3.69739	3.0254	4.17277	3.63575	4.07229	2.96653	3.54532	3.85279	3.85778	3.66191	3.17718	3.81514	3.70683	-1.01538	0.509868	0.220751	0.475302	-0.594351	0.20451	-0.160417	0.272703	0.026518	-0.249563	-0.027202	0.356582	0.827396	-0.31499	0.026166	-0.895114	0.848616	0.161519	0.987813	-0.587693	-0.000352	-0.645551	0.875818	-0.195063
13386195	AT1G71866	3.64095	4.1167	3.94773	4.25903	3.75267	3.99858	4.04708	3.88515	4.23558	3.87807	3.96787	3.72669	4.46694	4.11105	4.21559	4.33162	4.66695	3.94998	3.77528	4.37696	4.23718	4.09218	4.23017	4.21601	0.82599	-0.005647	0.267856	0.072592	0.914271	-0.0486	0.406136	-0.231547	0.287844	-0.380963	0.215199	-0.271889	-0.691663	0.265905	0.021596	-0.239439	-0.43678	0.266032	-1.0978	0.497452	-0.266248	0.141524	-0.651979	0.537921
13386788	AT1G73290	3.61932	3.75214	4.35585	3.52783	4.07903	3.79679	4.10599	4.53115	3.52081	3.84158	4.46919	3.45058	4.02573	4.76147	4.32546	4.10599	4.41954	4.34497	5.08221	3.63056	3.88078	4.35888	4.3044	4.4259	0.406408	1.00934	-0.030386	0.578161	0.340511	0.548185	0.486668	0.779008	-0.83504	0.313756	0.390154	-0.346209	1.05649	-1.13091	-0.444675	0.252897	-0.115149	0.080926	0.569818	-1.90992	0.390365	-0.060859	-0.505303	0.427135
13387134	AT1G74020	4.13285	3.53683	3.94851	3.85624	4.04658	3.54958	3.60758	3.82385	4.15135	4.4776	3.51997	4.68286	3.30351	3.47037	3.94443	3.83186	3.74897	3.70781	4.14806	3.94841	3.9545	3.94223	3.60984	4.04975	-0.829342	-0.06646	-0.004086	-0.02438	-0.297612	0.158225	-0.525268	0.287026	0.202835	0.621364	-0.526608	1.13328	0.844553	0.478047	0.010074	0.110373	-0.139121	0.341947	1.36982	0.191021	-0.192761	-0.510991	0.387487	-0.791331
13387187	AT1G74180	7.67517	8.02185	8.17952	7.94104	8.11528	7.73124	7.98388	7.8996	8.09436	7.85873	7.9693	7.71157	7.95303	7.88745	8.05648	8.04791	7.96529	7.48331	7.22965	7.92021	8.09569	7.57896	7.80079	7.51191	0.277856	-0.134398	-0.123036	0.106865	-0.149992	-0.24793	0.308706	-0.122251	-0.085159	-0.082308	-0.145974	-0.019666	-0.72338	0.032762	0.039216	-0.468946	-0.164499	0.028599	-1.03209	0.155013	0.124375	-0.386638	-0.018525	0.048265
13387276	AT1G74448	3.07409	3.33294	3.22323	3.60441	2.78777	3.40983	3.38263	3.24494	2.95082	3.45552	3.51224	3.38967	2.90443	4.2667	4.0431	3.53281	3.60184	3.0288	4.02173	3.31105	3.55275	3.40363	3.42576	3.00779	-0.169655	0.933765	0.819871	-0.071601	0.814072	-0.381033	0.308543	-0.087997	-0.272415	-0.148893	0.724469	-0.02016	1.1173	-0.955649	-0.490351	-0.129185	-0.176081	-0.021014	0.808755	-0.867652	-0.217936	0.019708	-0.90055	-0.000854
13388139	AT1G76470	3.96373	4.13596	4.36773	3.61293	3.97213	3.67375	4.15994	4.42675	3.4904	3.5017	5.38397	7.21309	3.47953	4.14825	3.39668	3.98634	3.74797	5.34444	5.12673	4.69529	4.69412	3.80965	4.32432	7.06869	-0.484201	0.01229	-0.971056	0.373412	-0.22416	1.67069	0.196218	0.290786	-0.877336	-0.111222	1.41184	3.53935	1.64721	0.54703	1.29745	-0.176688	0.576349	1.72425	1.45099	0.256244	2.17478	-0.065466	-0.835493	-1.81509
13388263	AT1G76760	6.14062	5.84056	5.86462	5.77775	6.28293	5.5022	6.15104	6.02114	6.28711	5.68503	5.86567	6.08788	6.08865	6.44408	6.34546	6.04018	6.39559	6.2439	6.99241	6.97664	6.88323	6.53467	6.56248	6.595	-0.051969	0.603518	0.480835	0.262423	0.11266	0.741704	0.010418	0.180578	0.422489	-0.092726	-0.417257	0.585678	0.903762	0.532565	0.537771	0.494492	0.166892	0.351103	0.893344	0.351987	0.115282	0.587218	0.584149	-0.234575
13388329	AT1G76955	5.31838	6.86613	7.01986	6.01835	7.02407	7.77727	5.64553	6.78649	7.22769	6.40046	7.54357	8.00468	4.99898	6.53159	7.06459	5.51161	8.1434	8.28126	5.66246	6.32344	7.13394	5.60701	8.27059	8.83	-0.3194	-0.334532	0.044735	-0.506739	1.11933	0.503991	0.327149	-0.079634	0.20783	0.382118	0.519503	0.227415	0.663481	-0.208157	0.069347	0.095406	0.127188	0.548741	0.336332	-0.128523	-0.138483	-0.286712	-0.392315	0.321326
13388791	AT1G77860	4.05659	3.65364	3.9396	4.85639	4.47694	4.46635	3.68848	4.20939	3.6001	4.55941	4.27103	4.66534	3.85842	4.0672	4.41105	5.10995	4.30467	4.50094	4.58913	3.83486	3.46789	5.09425	4.34525	4.64161	-0.198169	0.413566	0.471454	0.253564	-0.172272	0.034591	-0.368101	0.555752	-0.339495	-0.29698	-0.205917	0.198989	0.730718	-0.232342	-0.943163	-0.015703	0.040582	0.140672	1.09882	-0.788094	-0.603668	0.281277	0.246499	-0.058317
13388797	AT1G77880	4.11227	4.36091	4.42029	4.07687	4.52952	3.98268	4.12352	4.44611	4.31996	4.06533	4.54464	4.41304	4.80235	3.95208	4.43312	4.15679	5.24332	4.45904	4.14267	3.92742	4.61387	4.1492	4.55549	4.09744	0.690077	-0.408832	0.012831	0.079923	0.713796	0.476362	0.011241	0.085204	-0.100326	-0.011535	0.015111	0.430361	-0.659676	-0.024659	0.180752	-0.007591	-0.687836	-0.3616	-0.670917	-0.109863	0.281078	0.003944	-0.702947	-0.791961
13388886	AT1G78220	3.27591	3.0158	3.19818	3.17485	3.03888	3.08847	2.89918	3.28222	3.24703	3.29079	2.90009	3.19802	3.23437	3.50688	3.4362	3.4756	3.54439	3.67537	3.87982	3.4015	3.99505	3.33215	3.51611	3.63879	-0.041543	0.491079	0.238025	0.300755	0.505516	0.586899	-0.376729	0.266417	0.048857	0.115941	-0.138785	0.109549	0.645448	-0.105382	0.558847	-0.143455	-0.028283	-0.036584	1.02218	-0.371799	0.50999	-0.259396	0.110502	-0.146133
13388936	AT1G78360	3.65552	3.08728	3.21748	3.42936	3.99208	3.02439	3.53636	3.4073	3.08329	3.50047	3.53653	4.1844	3.70147	3.15935	4.34723	3.72547	3.79766	3.53348	4.5516	3.36773	3.50894	4.21197	4.09065	3.96914	0.045946	0.072072	1.12975	0.296111	-0.194427	0.50909	-0.119158	0.320023	-0.134192	0.071112	-0.455553	1.16001	0.850128	0.208385	-0.838284	0.4865	0.292995	0.435663	0.969286	-0.111638	-0.704092	0.415388	0.748548	-0.72435
13389072	AT1G78740	2.72401	3.30613	3.03966	3.26387	2.86743	3.37866	2.65793	3.16233	2.66034	2.82307	2.8075	2.94192	4.97335	4.65573	4.16479	3.57419	3.9856	4.32947	3.94555	4.13834	3.85074	3.49302	4.02542	4.67539	2.24934	1.34959	1.12513	0.31032	1.11817	0.950806	-0.06608	-0.143809	-0.379323	-0.440792	-0.059927	-0.43674	-1.02779	-0.517384	-0.314049	-0.081165	0.039814	0.345927	-0.961712	-0.373575	0.065274	0.359627	0.099741	0.782667
13389185	AT1G78922	5.51063	5.95311	5.35235	5.15476	5.65175	5.32007	5.43306	5.34294	5.88997	4.91712	5.46894	6.11047	6.37874	6.84389	6.32999	5.84608	6.01444	6.29521	7.04486	6.88171	6.76659	6.00973	6.05911	6.44516	0.868113	0.890777	0.977638	0.691327	0.362691	0.975142	-0.077573	-0.610176	0.53762	-0.237639	-0.18281	0.790401	0.666116	0.037823	0.4366	0.16365	0.044663	0.149945	0.743689	0.647999	-0.10102	0.401289	0.227473	-0.640456
13389891	AT1G79960	5.16813	5.44442	5.41108	5.48275	5.30481	5.32444	5.22784	6.05597	5.68626	5.21773	5.54657	5.4852	5.34334	5.34204	5.20748	5.61892	5.0446	5.55269	6.04784	5.65353	5.63595	5.4708	5.34647	5.72316	0.175216	-0.102377	-0.203593	0.136168	-0.260209	0.228258	0.059712	0.611551	0.275185	-0.265015	0.241759	0.160765	0.704501	0.311495	0.428462	-0.148119	0.301867	0.170468	0.644789	-0.300056	0.153277	0.116896	0.060108	0.009703
13390431	AT2G01360	2.73634	2.74827	2.13923	2.74057	3.04795	2.73026	2.42681	2.84041	2.18031	2.74057	2.49181	2.83813	3.89166	2.74057	2.88299	3.19149	2.57436	2.51579	2.87893	2.85234	2.77986	2.51913	2.5124	2.92605	1.15532	-0.007702	0.743758	0.450925	-0.473588	-0.214468	-0.309531	0.092134	0.041076	0	-0.556142	0.107874	-1.01273	0.111768	-0.103124	-0.672366	-0.061969	0.410259	-0.703202	0.019634	-0.1442	-0.672366	0.494173	0.302385
13390493	AT2G01520	4.68843	4.62048	4.38949	5.26022	4.41927	5.26135	4.473	5.09158	4.75631	4.35095	5.46786	4.39495	3.94273	4.54456	4.67541	4.39436	5.75652	5.02555	4.57399	4.43923	4.07149	4.66794	5.98039	5.07985	-0.745702	-0.075922	0.285919	-0.865854	1.33725	-0.235795	-0.215431	0.471094	0.366816	-0.909261	1.04858	-0.866397	0.631263	-0.105329	-0.60392	0.273579	0.223861	0.054298	0.846694	-0.576423	-0.970736	1.18284	-0.824723	0.920695
13390765	AT2G02140	2.4675	2.57323	2.43434	2.64801	2.51857	2.51858	2.64988	2.77447	2.51968	2.88798	2.66511	2.19955	3.4331	3.11694	2.64211	2.70381	2.62066	2.75624	2.69615	2.89422	2.77435	2.72811	2.67179	2.73882	0.965594	0.543711	0.207768	0.055796	0.102093	0.237655	0.182377	0.201238	0.085342	0.23997	0.146542	-0.319035	-0.736948	-0.222724	0.132247	0.024298	0.05113	-0.017421	-0.919325	-0.423962	0.046905	-0.215672	-0.095412	0.301614
13390784	AT2G02290	2.90219	3.77126	3.63785	3.71001	3.7895	3.35269	3.4825	4.042	3.43082	3.20565	3.21222	3.72665	4.54962	3.71514	3.12391	3.49746	3.0228	3.32561	3.23563	3.14232	3.45395	3.41906	3.52491	3.69344	1.64742	-0.05612	-0.513941	-0.212552	-0.766707	-0.027071	0.580305	0.270733	-0.207029	-0.504367	-0.57728	0.373965	-1.31399	-0.572824	0.33004	-0.0784	0.502112	0.367823	-1.8943	-0.843557	0.537069	0.425967	1.07939	-0.006142
13391137	AT2G03190	2.61608	2.58289	3.03002	2.74119	2.46884	3.03526	2.65421	2.74665	2.69942	2.73713	2.97132	2.55106	2.51154	2.75642	2.74665	3.05222	2.86165	2.98877	3.15666	2.67165	2.5561	2.88802	2.56302	3.26616	-0.104545	0.173532	-0.283375	0.311032	0.392804	-0.04649	0.038127	0.163759	-0.330605	-0.004062	0.502473	-0.484199	0.645126	-0.084775	-0.190546	-0.164205	-0.298631	0.277387	0.606999	-0.248534	0.140059	-0.160143	-0.801104	0.761586
13391142	AT2G03270	6.96688	6.45494	6.80648	6.68267	6.77155	6.13404	6.45253	6.57879	6.35146	7.26982	6.51685	6.26999	4.8927	5.0991	4.96695	5.37262	5.71223	5.29988	5.71047	5.69164	5.03381	5.03211	5.30395	4.99911	-2.07418	-1.35584	-1.83954	-1.31004	-1.05932	-0.834152	-0.514353	0.12385	-0.455021	0.587156	-0.254697	0.13595	0.817769	0.592535	0.066862	-0.340513	-0.408279	-0.300779	1.33212	0.468685	0.521883	-0.927669	-0.153582	-0.436729
13391194	AT2G03505	5.86111	6.16289	4.97765	5.43299	6.0618	6.53005	6.16071	5.6238	5.71109	5.51897	6.7297	6.92272	5.39518	5.342	5.52531	5.61996	5.44594	5.86111	6.52178	5.98113	5.91343	5.88581	5.86111	6.49041	-0.465923	-0.820897	0.54766	0.186976	-0.615866	-0.668947	0.299601	-0.53909	0.733447	0.085984	0.667901	0.392667	1.1266	0.639137	0.388126	0.26585	0.415169	0.629302	0.826997	1.17823	-0.345321	0.179866	-0.252732	0.236635
13391239	AT2G03565	3.89577	3.98925	3.51176	3.7559	3.50323	3.86719	3.73488	4.08605	3.74187	4.00042	3.53491	3.95122	4.68306	4.57055	3.8703	3.46477	3.80826	4.0102	3.53605	3.60967	3.89825	4.50356	3.88992	3.586	0.787293	0.581303	0.358544	-0.291138	0.305033	0.143009	-0.160887	0.096802	0.230109	0.244512	0.031685	0.084023	-1.14701	-0.960884	0.027946	1.03879	0.08166	-0.424207	-0.986123	-1.05769	-0.202163	0.794283	0.049975	-0.50823
13391267	AT2G03610	4.08696	4.19142	3.56588	4.37806	4.41506	4.3088	4.08737	4.38278	4.18657	4.08203	3.80283	4.54811	4.273	3.93967	4.25448	4.37762	4.19142	4.57874	4.9463	4.1906	4.60961	4.21611	3.9013	4.13241	0.186045	-0.251748	0.688598	-0.000434	-0.223646	0.269933	0.000415	0.191364	0.620688	-0.296028	-0.612232	0.239309	0.673298	0.250931	0.355131	-0.161512	-0.290112	-0.446329	0.672883	0.059567	-0.265557	0.134516	0.32212	-0.685638
13391424	AT2G04020	3.17526	3.52455	3.31584	3.39143	3.17452	3.2145	3.68333	3.07536	3.15899	3.34267	3.08921	3.2015	4.01499	3.31584	3.30077	3.62481	3.31584	3.13691	3.36211	3.40542	3.80949	3.53452	3.2705	3.04547	0.839732	-0.208717	-0.015065	0.233386	0.141319	-0.077588	0.508071	-0.449193	-0.156841	-0.048762	-0.085306	-0.012996	-0.652887	0.089586	0.508716	-0.09029	-0.045338	-0.091439	-1.16096	0.538779	0.665557	-0.041528	0.039968	-0.078443
13391567	AT2G04400	9.60174	9.66817	9.4992	9.23983	9.68858	9.87066	9.91693	10.2122	10.2152	9.44892	10.4065	10.6152	10.075	10.3822	10.1868	9.59959	9.93303	10.3166	10.9182	11.0305	10.6851	10.197	10.524	10.745	0.47328	0.714019	0.687634	0.359755	0.244451	0.445922	0.315192	0.544069	0.716014	0.209088	0.717919	0.744592	0.8432	0.64828	0.49831	0.597424	0.590978	0.42842	0.528008	0.104211	-0.217704	0.388336	-0.126941	-0.316172
13391578	AT2G04420	5.46345	5.56469	5.37176	5.47335	6.40055	6.18291	5.74963	5.96156	5.37333	5.25293	5.55912	5.61938	6.3145	6.81778	6.98014	7.19605	6.8926	6.40715	5.34798	6.319	6.33059	6.33104	7.00665	6.48864	0.851049	1.25309	1.60838	1.7227	0.492047	0.224234	0.286177	0.396876	0.001566	-0.22041	-0.841432	-0.563531	-0.966516	-0.498783	-0.649554	-0.865008	0.114056	0.081493	-1.25269	-0.895659	-0.65112	-0.644598	0.955488	0.645024
13391691	AT2G04780	4.78535	4.93994	4.59129	5.27219	5.37055	5.4109	4.8125	4.46706	4.59866	5.03483	5.04138	4.94377	4.75494	4.8376	4.78991	4.75982	4.66797	4.7757	3.98844	4.38573	4.57986	4.78535	4.77303	4.39841	-0.03041	-0.102343	0.198626	-0.512367	-0.70258	-0.635206	0.027154	-0.472875	0.007373	-0.237359	-0.329171	-0.467131	-0.766494	-0.451869	-0.210051	0.025526	0.10506	-0.37729	-0.793648	0.021006	-0.217424	0.262885	0.434231	0.089841
13391813	AT2G05380	10.4528	10.3842	10.5642	10.9378	10.5232	11.0515	10.7529	10.8037	10.6396	11.294	10.5245	10.896	9.81172	9.59935	8.88712	10.1626	9.84164	10.1635	10.539	10.3898	9.08389	10.887	9.50628	9.51304	-0.641111	-0.784896	-1.67712	-0.77523	-0.681603	-0.88798	0.30004	0.41944	0.0754	0.35618	0.00125	-0.15548	0.727331	0.790496	0.196766	0.72437	-0.335358	-0.650491	0.427291	0.371056	0.121366	0.36819	-0.336608	-0.495011
13391850	AT2G05510	3.7089	3.66169	3.29476	3.52435	3.26048	3.17741	3.81776	3.18393	3.4949	3.45217	3.17176	3.34309	4.05084	3.49308	3.83031	3.57457	3.43779	3.20397	3.3115	3.64074	3.63342	3.87111	3.24561	3.23181	0.341937	-0.168606	0.535551	0.050212	0.17732	0.026553	0.108859	-0.477759	0.200138	-0.072182	-0.088715	0.165683	-0.739342	0.147658	-0.196886	0.296542	-0.192185	0.027848	-0.848201	0.625417	-0.397024	0.368724	-0.10347	-0.137835
13391897	AT2G05635	2.79203	3.12739	3.20896	3.41391	2.89525	3.33845	2.94671	3.06498	3.2687	3.94912	3.06054	2.93756	3.7618	3.12072	3.37411	4.07388	3.43015	3.58269	3.07647	3.73139	3.91058	3.22549	3.15279	3.21652	0.969768	-0.006669	0.165153	0.65997	0.534903	0.244239	0.154677	-0.06241	0.059738	0.535208	0.165292	-0.400887	-0.685327	0.610669	0.536469	-0.848389	-0.277362	-0.366165	-0.840004	0.673079	0.476731	-1.3836	-0.442654	0.034722
13392070	AT2G06420	3.84007	4.69743	4.59004	4.05525	4.02067	4.30609	3.91786	4.54852	4.49965	4.37355	3.95443	4.08572	3.87167	4.13559	4.86009	4.13024	4.27539	4.69937	4.67104	4.01997	3.98469	3.66677	4.21314	4.37899	0.031604	-0.561845	0.270053	0.074984	0.254723	0.393284	0.077797	-0.148908	-0.09039	0.31829	-0.066241	-0.220366	0.799371	-0.115619	-0.875397	-0.463469	-0.06226	-0.320378	0.721574	0.033289	-0.785007	-0.781759	0.003981	-0.100012
13392103	AT2G06983	2.54767	2.90213	2.94667	2.93666	2.69198	2.95866	2.83553	3.02134	3.25421	2.64113	2.68998	2.88754	2.82579	2.88754	2.93953	2.968	2.75766	2.86942	3.57826	2.74545	3.36306	2.80875	3.09275	2.89776	0.278122	-0.014585	-0.007144	0.03134	0.065679	-0.089242	0.287861	0.119205	0.307546	-0.295522	-0.002003	-0.071116	0.752463	-0.142096	0.423537	-0.159249	0.335093	0.028337	0.464602	-0.261301	0.115991	0.136273	0.337096	0.099453
13392214	AT2G07673	4.58852	3.50106	4.47848	4.01496	4.56435	4.33183	4.90342	3.90159	4.90802	5.10087	4.82622	5.16353	3.62704	4.17103	4.60238	4.80503	4.03622	4.38466	4.42441	4.66898	4.26876	5.53634	4.73479	4.07572	-0.961483	0.669969	0.123899	0.790067	-0.528127	0.052834	0.314893	0.400536	0.429537	1.08591	0.261867	0.831699	0.797373	0.497955	-0.333621	0.731306	0.698563	-0.308948	0.48248	0.097419	-0.763158	-0.354603	0.436696	-1.14065
13392229	AT2G07746	6.94402	7.21227	7.37143	7.55791	7.50473	7.52876	6.72125	7.81147	6.53962	7.13774	6.48713	6.97029	6.2029	6.31872	6.74834	7.49049	6.89809	7.16192	7.23066	6.17084	6.41292	6.38981	7.68562	6.8955	-0.741122	-0.893543	-0.623092	-0.067421	-0.606636	-0.366842	-0.222774	0.599202	-0.831811	-0.420174	-1.0176	-0.55847	1.02776	-0.14788	-0.335421	-1.10068	0.787533	-0.266419	1.25054	-0.747082	0.49639	-0.680501	1.80513	0.292051
13392784	AT2G13810	4.96739	4.12887	4.0739	3.72885	3.81932	4.08502	4.81897	4.37141	6.19606	3.62824	7.01314	9.40425	6.72045	7.62293	6.33659	6.8485	7.28668	9.52737	8.26456	8.50676	7.5627	8.02012	9.40242	10.7758	1.75306	3.49406	2.26269	3.11965	3.46736	5.44235	-0.148422	0.242546	2.12217	-0.100611	3.19382	5.31923	1.54411	0.883832	1.22611	1.17162	2.11574	1.24845	1.69253	0.641286	-0.896058	1.27223	-1.07808	-4.07077
13392807	AT2G13960	5.09983	5.36658	5.45708	4.46	4.9745	4.61109	5.46209	5.29165	4.99604	5.04234	5.30026	5.29698	5.57788	4.78126	4.43034	4.2798	4.50797	4.21721	4.48817	4.14478	4.71718	3.64945	4.68418	4.07878	0.478051	-0.585324	-1.02674	-0.180204	-0.466527	-0.393879	0.362265	-0.074936	-0.461031	0.582341	0.325762	0.685897	-1.08971	-0.636477	0.286843	-0.630347	0.17621	-0.138423	-1.45198	-0.561541	0.747874	-1.21269	-0.149552	-0.82432
13392877	AT2G14247	6.07732	6.21839	5.43457	7.11324	8.02064	4.68576	6.12728	4.4604	5.00746	5.81566	6.92947	4.36602	5.94339	5.93279	6.28848	6.26377	6.74711	6.35028	8.11748	5.60871	5.51629	5.25301	5.62259	6.39887	-0.133936	-0.2856	0.853909	-0.849476	-1.27353	1.66453	0.049957	-1.758	-0.427108	-1.29758	-1.09117	-0.319734	2.17409	-0.324079	-0.772189	-1.01076	-1.12451	0.048586	2.12413	1.43392	-0.345081	0.286823	-0.033343	0.36832
13393058	AT2G14935	5.229	5.57336	4.32346	5.64046	4.66359	4.95731	4.98689	5.21338	5.37391	5.01803	5.10566	4.73026	5.97301	5.39717	5.44995	5.00117	5.5008	4.93124	5.1679	5.83117	5.33116	5.79899	4.76313	5.55074	0.744005	-0.176193	1.1265	-0.639286	0.837206	-0.026068	-0.24211	-0.359975	1.05045	-0.622426	0.442069	-0.22705	-0.805105	0.434008	-0.11879	0.797817	-0.737671	0.619495	-0.562995	0.793983	-1.16924	1.42024	-1.17974	0.846545
13393180	AT2G15480	4.95341	3.82502	3.16911	4.48588	4.64073	4.82071	5.29097	4.49994	4.55941	4.69864	4.46396	4.77672	6.23541	5.00507	5.39496	5.55681	5.69659	5.59339	7.34747	6.18294	5.6671	6.40625	5.51966	6.01519	1.282	1.18006	2.22585	1.07093	1.05586	0.772685	0.33756	0.674925	1.3903	0.212764	-0.176773	-0.043988	1.11206	1.17786	0.272134	0.849438	-0.17693	0.421796	0.774495	0.502939	-1.11816	0.636674	-0.000157	0.465784
13393246	AT2G15670	3.42643	3.51848	3.81356	3.69166	3.37053	3.41953	3.46578	4.02938	3.18455	3.40167	3.45601	3.49285	3.91129	3.79101	3.58742	3.42004	3.40568	3.71074	3.12124	3.59736	3.73097	3.62851	3.65571	3.70037	0.484858	0.272526	-0.226132	-0.271624	0.035153	0.291209	0.039343	0.510904	-0.629001	-0.289994	0.085487	0.07332	-0.790054	-0.193643	0.143543	0.208464	0.250035	-0.010373	-0.829397	-0.704547	0.772544	0.498458	0.164548	-0.083693
13393463	AT2G16850	5.20732	4.62097	5.05355	5.36594	5.21202	4.98324	4.72956	4.57236	5.36594	5.28761	4.92804	4.69673	6.03761	5.8064	5.99201	6.3348	5.76921	6.00757	5.24716	5.55911	5.82711	6.64048	5.61858	5.83722	0.830289	1.18543	0.938455	0.968859	0.557195	1.02433	-0.477756	-0.048609	0.312389	-0.07833	-0.283975	-0.286503	-0.790451	-0.247294	-0.164904	0.305681	-0.150632	-0.17035	-0.312695	-0.198685	-0.477293	0.384011	0.133343	0.116153
13393571	AT2G16990	6.13992	7.0717	6.88733	6.38955	7.15654	8.04083	6.19673	6.90362	6.62972	6.74304	7.10891	7.8726	6.24792	6.61856	6.78246	6.58361	6.63364	6.98185	5.37094	6.73193	6.62642	6.7863	6.53915	6.99229	0.108003	-0.453144	-0.104866	0.19406	-0.522899	-1.05898	0.056809	-0.168076	-0.25761	0.353487	-0.04763	-0.168233	-0.876987	0.113368	-0.156043	0.20269	-0.094491	0.010446	-0.933796	0.281444	0.101567	-0.150797	-0.046861	0.178679
13393672	AT2G17265	7.55171	7.5838	7.70307	7.92638	7.97931	8.20874	7.98334	7.74092	7.64177	8.08037	7.94508	8.18114	7.34245	7.24412	7.22111	7.62597	8.09889	8.15467	7.97323	7.869	7.90896	7.77642	8.19519	8.1533	-0.209264	-0.339679	-0.481959	-0.300409	0.119579	-0.054072	0.431628	0.157125	-0.061305	0.15399	-0.034227	-0.0276	0.630784	0.624878	0.687843	0.150458	0.096303	-0.00137	0.199156	0.467753	0.749148	-0.003532	0.13053	0.02623
13393877	AT2G17660	4.62604	4.84603	4.67184	4.76893	4.81919	5.00804	4.66065	4.68845	4.48507	5.02105	4.42363	3.64326	5.3034	5.27413	5.07003	4.86247	4.76008	4.59219	4.55293	5.48207	5.22938	4.77408	4.8448	5.20609	0.677355	0.428109	0.398191	0.09354	-0.059115	-0.41585	0.034608	-0.157579	-0.186771	0.252117	-0.395561	-1.36478	-0.750474	0.207933	0.159341	-0.088398	0.084725	0.613898	-0.785082	0.365512	0.346112	-0.340515	0.480286	1.97868
13394239	AT2G18670	8.88931	8.15191	8.59114	8.20581	8.45059	8.03833	9.00432	8.62666	8.77851	8.4499	8.23419	8.10039	8.55041	8.97043	8.62145	8.49678	8.56753	8.0089	9.31575	8.83656	8.68607	8.68604	8.40698	8.34896	-0.338897	0.818511	0.030311	0.290975	0.116945	-0.029431	0.115011	0.474742	0.187371	0.244092	-0.216402	0.062064	0.765335	-0.133861	0.064622	0.189253	-0.160553	0.34007	0.650324	-0.608603	-0.122749	-0.054839	0.055849	0.278006
13394256	AT2G18721	4.94258	5.55706	4.94422	5.11915	5.2296	5.2002	5.21002	5.78286	4.74824	5.52759	4.88159	5.4798	5.18936	4.88549	5.45076	4.95892	5.23452	5.04368	5.87436	5.67744	4.98315	5.27884	5.06959	5.22706	0.246779	-0.671573	0.506539	-0.160229	0.004927	-0.15652	0.267435	0.225797	-0.19598	0.40844	-0.348004	0.279601	0.684997	0.791958	-0.46761	0.319924	-0.164935	0.183384	0.417562	0.566161	-0.27163	-0.088516	0.183069	-0.096217
13394562	AT2G19380	5.18304	4.3453	5.005	5.36329	5.44496	5.44192	5.30109	5.03226	4.89915	5.01448	5.36578	5.09929	5.58534	4.83157	4.79315	5.62215	5.76944	5.66284	4.54746	4.46271	4.75343	4.56416	5.63044	5.20717	0.402302	0.48627	-0.211846	0.258859	0.324483	0.220916	0.118059	0.686956	-0.105851	-0.348812	-0.079178	-0.342637	-1.03788	-0.368865	-0.039729	-1.05799	-0.138994	-0.455669	-1.15594	-1.05582	0.066122	-0.709176	-0.059816	-0.113032
13394813	AT2G19890	3.2716	3.74031	3.60848	3.72929	3.37662	4.09546	3.47396	3.97987	3.49412	3.74763	3.43477	3.90953	3.50949	4.29806	3.50694	3.33337	3.34242	3.93072	4.17475	3.59804	3.76699	3.41337	3.466	3.52678	0.2379	0.557756	-0.101539	-0.395924	-0.034196	-0.164738	0.20236	0.239561	-0.114358	0.018337	0.058146	-0.185925	0.665253	-0.700021	0.260054	0.080002	0.12358	-0.403935	0.462893	-0.939582	0.374412	0.061665	0.065434	-0.21801
13394839	AT2G19960	2.71781	2.96818	3.35547	2.76173	3.18978	2.91196	3.06287	3.45524	3.0294	2.76316	2.84347	2.80487	2.83125	3.151	3.16649	3.37737	3.42636	3.3581	4.02911	3.16911	2.89012	2.86131	3.22668	2.83853	0.113446	0.182828	-0.188981	0.615635	0.236585	0.44614	0.345064	0.487064	-0.326068	0.001429	-0.346308	-0.107094	1.19786	0.01811	-0.276372	-0.516053	-0.199685	-0.519573	0.852795	-0.468954	0.049696	-0.517482	0.146623	-0.412479
13395112	AT2G20597	3.31701	3.07249	3.51128	3.55178	3.56598	3.13882	3.36429	3.54891	3.49619	3.74829	3.22421	3.42074	4.30759	3.82174	3.25659	3.56464	3.475	4.08492	3.37161	3.54044	3.70251	3.36618	3.80254	3.60615	0.990585	0.749243	-0.254683	0.012858	-0.09098	0.946098	0.047288	0.476412	-0.01509	0.196511	-0.341777	0.281924	-0.935986	-0.281295	0.445912	-0.198465	0.327532	-0.478767	-0.983274	-0.757707	0.461002	-0.394976	0.669309	-0.760691
13395181	AT2G20784	3.773	4.41496	4.56888	4.99797	4.05006	4.40103	4.04061	3.50627	4.38408	4.63807	4.35368	4.37407	4.69986	4.38408	4.42662	5.16969	4.4089	4.82865	4.03904	4.05006	5.2659	4.46997	4.09032	4.44955	0.926868	-0.030884	-0.142251	0.171723	0.358846	0.42762	0.267608	-0.908692	-0.184798	-0.359906	0.303629	-0.026956	-0.660823	-0.334022	0.839275	-0.699725	-0.318584	-0.379096	-0.928431	0.57467	1.02407	-0.339819	-0.622213	-0.35214
13395211	AT2G20880	3.67687	4.32096	3.50041	4.07898	5.47129	6.21358	3.43827	4.12074	3.67041	3.62886	5.36634	5.4615	3.91484	3.87352	4.27802	4.59643	5.19014	5.62751	5.03798	4.65665	3.77576	4.37886	4.72586	5.30638	0.23797	-0.447437	0.777603	0.517454	-0.281155	-0.586068	-0.2386	-0.200218	0.169993	-0.450122	-0.104947	-0.752088	1.12313	0.783129	-0.502253	-0.21757	-0.464277	-0.321136	1.36173	0.983347	-0.672246	0.232552	-0.35933	0.430952
13395248	AT2G20970	3.70527	4.32266	4.27469	3.7471	4.22913	4.40464	3.9108	4.44662	3.87558	3.91172	3.59025	3.31591	3.80023	3.37981	4.4767	3.90524	3.92214	4.10194	4.43916	3.67009	3.68795	3.5013	4.48416	4.00206	0.094958	-0.94284	0.20201	0.158137	-0.306988	-0.302699	0.205529	0.123962	-0.399107	0.164617	-0.638883	-1.08873	0.638931	0.290276	-0.788747	-0.40394	0.562018	-0.099875	0.433402	0.166314	-0.38964	-0.568557	1.2009	0.988856
13395286	AT2G21050	7.78817	8.2896	8.41968	8.56261	9.19306	8.46059	8.08867	8.1528	7.88016	8.45389	8.81148	7.68366	7.65325	8.22446	8.20379	8.03718	8.4823	7.83584	6.92195	7.57259	8.0769	7.90183	8.17583	7.4734	-0.134924	-0.065132	-0.215891	-0.525428	-0.710759	-0.62475	0.300495	-0.136795	-0.539513	-0.10872	-0.381581	-0.776931	-0.731293	-0.651876	-0.126888	-0.135352	-0.306475	-0.362436	-1.03179	-0.515081	0.412625	-0.026632	0.075106	0.414495
13395584	AT2G21640	7.84923	7.64627	7.95053	7.61712	7.89065	7.34215	7.58616	7.77814	8.14486	7.42542	8.1507	7.42389	6.70756	7.02072	6.47871	6.07411	5.5942	5.5804	7.47965	6.9553	6.62877	6.2072	5.68363	5.55504	-1.14167	-0.625551	-1.47183	-1.54301	-2.29645	-1.76175	-0.263075	0.131871	0.194331	-0.191704	0.26005	0.081739	0.77209	-0.065417	0.150059	0.13309	0.089432	-0.025363	1.03516	-0.197288	-0.044272	0.324794	-0.170618	-0.107102
13395620	AT2G21730	5.70006	5.84653	5.77497	5.47293	5.84043	6.0122	5.56584	5.94526	5.02662	5.60925	5.50911	5.57132	7.07043	6.12432	6.47614	6.49708	6.47543	6.50373	6.38112	6.45578	6.60231	6.06503	6.83777	6.40414	1.37037	0.277793	0.701165	1.02415	0.635008	0.491536	-0.134224	0.098729	-0.748355	0.136325	-0.331319	-0.440879	-0.68932	0.33146	0.126169	-0.432048	0.362337	-0.099591	-0.555096	0.232731	0.874524	-0.568373	0.693656	0.341288
13395943	AT2G22580	3.21311	2.92729	2.56402	3.23262	2.72401	2.66577	3.16998	3.61039	3.01533	3.41016	3.26687	2.63331	3.92055	3.2446	3.85501	3.57313	3.14056	2.90905	2.82829	3.29436	4.09345	3.12651	3.12836	3.63373	0.707442	0.317313	1.29099	0.340505	0.416555	0.24328	-0.043134	0.683098	0.451303	0.177536	0.542863	-0.032461	-1.09226	0.049764	0.238441	-0.446623	-0.012206	0.724678	-1.04913	-0.633334	-0.212862	-0.624159	-0.555069	0.757139
13396180	AT2G23000	5.13362	4.98884	5.4461	5.00502	7.88388	8.59812	4.74961	4.93698	4.7592	4.87947	8.46888	9.33375	4.63883	4.13973	3.99185	4.51769	6.92364	7.52827	3.46809	4.44133	3.71338	4.66337	7.30099	7.54519	-0.494784	-0.849113	-1.45425	-0.487339	-0.960243	-1.06985	-0.384009	-0.051858	-0.686901	-0.125559	0.584993	0.735626	-1.17074	0.301603	-0.278467	0.145681	0.377346	0.01692	-0.786734	0.353461	0.408434	0.27124	-0.207647	-0.718706
13396259	AT2G23142	2.29639	2.41334	2.82222	2.47989	2.44775	3.1989	2.42541	2.37948	2.2948	2.98765	2.36845	2.38463	3.24729	2.72786	2.51317	2.50272	2.304	2.68623	2.59659	2.48662	2.49172	2.53112	2.59028	2.45505	0.950896	0.314523	-0.309052	0.022837	-0.143753	-0.512675	0.12902	-0.033865	-0.527417	0.507761	-0.079307	-0.814266	-0.650696	-0.241245	-0.021446	0.028392	0.286278	-0.231175	-0.779716	-0.20738	0.505971	-0.479369	0.365585	0.583091
13396292	AT2G23270	5.07486	4.60933	5.01523	4.65687	5.12093	4.46703	5.63163	5.57069	5.27171	5.81309	4.93552	5.74657	7.3289	6.11765	5.33869	6.05197	5.54278	5.66794	8.20857	7.30459	5.51531	7.53445	5.5331	6.7948	2.25404	1.50832	0.323459	1.3951	0.42185	1.20091	0.556763	0.961356	0.256479	1.15622	-0.18541	1.27954	0.879666	1.18694	0.176621	1.48248	-0.009683	1.12685	0.322903	0.225586	-0.079858	0.326265	0.175727	-0.152682
13396446	AT2G23834	2.27995	2.38948	2.43232	2.76673	2.05113	2.47784	2.38948	2.98309	2.38948	2.24338	2.28651	2.1785	3.15015	2.42351	2.60492	2.70836	2.20259	2.30997	2.30468	2.11282	3.34952	2.86223	2.26857	2.27844	0.870205	0.034025	0.172604	-0.058372	0.151457	-0.167865	0.109533	0.593612	-0.042836	-0.523351	0.235376	-0.29934	-0.84547	-0.310682	0.744598	0.153871	0.06598	-0.031532	-0.955003	-0.904294	0.787434	0.677222	-0.169396	0.267808
13396472	AT2G23910	4.53849	5.87619	7.62082	7.69692	4.40516	4.66179	4.40578	5.91948	7.69506	7.68573	4.24894	6.44786	4.09158	5.48453	8.5256	8.12618	4.65119	4.56055	5.16816	6.61605	8.13734	8.00066	4.78329	3.99422	-0.446907	-0.391665	0.90478	0.429263	0.246031	-0.101239	-0.132713	0.043287	0.074242	-0.011191	-0.156222	1.78607	1.07658	1.13152	-0.388262	-0.125521	0.132092	-0.566334	1.20929	1.08823	-0.462504	-0.11433	0.288314	-2.35241
13396481	AT2G23920	4.21576	4.47987	4.06214	4.52984	4.31994	4.8241	4.35207	4.284	3.75844	3.89612	4.63053	4.26385	4.42396	3.997	4.30863	4.03799	4.03802	4.44577	5.17315	4.26277	4.15761	4.39295	4.6693	4.36402	0.2082	-0.482871	0.246493	-0.491855	-0.281925	-0.378332	0.136304	-0.195867	-0.303703	-0.633724	0.310585	-0.560255	0.749184	0.265776	-0.151027	0.354964	0.631283	-0.081747	0.61288	0.461643	0.152676	0.988688	0.320698	0.478508
13396559	ATH-MIR83	2.71362	3.47794	3.05565	3.18252	2.76161	2.75149	2.52715	3.79333	2.97384	2.73731	3.0238	2.67707	3.13067	3.47928	3.16638	2.85908	3.83687	3.19358	3.95168	3.50654	2.85924	2.59351	3.5163	3.06429	0.417045	0.00134	0.110736	-0.32344	1.07526	0.442091	-0.186471	0.315391	-0.081807	-0.445207	0.262188	-0.074419	0.821009	0.027259	-0.307145	-0.265573	-0.320571	-0.129292	1.00748	-0.288132	-0.225338	0.179634	-0.582759	-0.054873
13396561	AT2G24130	3.2489	3.59767	3.60781	3.67797	3.72865	3.72362	3.3676	3.61039	3.42976	3.41118	3.42194	3.6633	4.22034	3.59171	3.80234	3.5338	3.59171	3.47747	3.49656	3.86059	3.87837	3.86409	3.22895	3.52418	0.97144	-0.005956	0.194534	-0.14417	-0.136937	-0.246149	0.1187	0.012729	-0.178055	-0.266788	-0.306706	-0.060317	-0.723774	0.268877	0.076027	0.330297	-0.362757	0.046706	-0.842474	0.256148	0.254082	0.597085	-0.056051	0.107023
13396932	AT2G25295	2.23107	1.99396	1.9569	2.18647	2.18167	1.88597	2.48033	2.12709	2.0744	1.98732	1.94012	2.07756	2.69358	2.6435	2.08238	2.7173	2.29507	2.03554	3.41806	2.50938	2.11359	2.60714	2.11329	2.0743	0.462518	0.64954	0.125479	0.530831	0.113401	0.149572	0.249262	0.133133	0.117493	-0.199149	-0.241555	0.19159	0.724473	-0.134115	0.031207	-0.11016	-0.181785	0.03876	0.475211	-0.267248	-0.086286	0.088989	0.05977	-0.15283
13396960	AT2G25360	2.94303	2.60047	2.43121	3.02963	2.77341	3.02471	2.45791	2.84048	2.7425	2.53258	2.4314	2.87972	2.78179	3.21605	4.08655	3.61192	3.44226	3.24515	3.71308	3.00241	2.83031	3.48324	4.3905	3.47517	-0.161238	0.615579	1.65534	0.582293	0.668847	0.220442	-0.485121	0.240003	0.311289	-0.497048	-0.342011	-0.144989	0.931283	-0.213644	-1.25624	-0.128681	0.948237	0.230019	1.4164	-0.453647	-1.56753	0.368367	1.29025	0.375008
13397034	AT2G25530	5.96503	5.93504	5.8052	6.34863	6.52399	7.34332	5.96128	6.07791	5.84265	5.97156	6.65935	7.54517	6.96916	6.49198	6.3645	7.02623	7.22186	7.33493	6.31836	6.38897	6.59534	6.60643	7.20151	7.57167	1.00413	0.556938	0.559299	0.677593	0.697875	-0.008387	-0.003747	0.142865	0.037451	-0.377072	0.135359	0.201853	-0.650797	-0.103005	0.230841	-0.419795	-0.020354	0.236742	-0.64705	-0.24587	0.19339	-0.042723	-0.155713	0.034889
13397254	AT2G26020	8.8274	7.31996	6.91518	6.37391	8.55456	6.30577	8.73878	8.6759	8.55204	7.96562	9.38522	7.8074	6.48104	5.07971	4.5015	4.98492	6.04615	5.86	8.10923	7.34063	6.72055	6.57144	7.41871	6.24118	-2.34635	-2.24025	-2.41368	-1.38899	-2.50841	-0.445766	-0.088616	1.35594	1.63686	1.59171	0.830661	1.50164	1.62819	2.26092	2.21904	1.58652	1.37255	0.381175	1.7168	0.904986	0.582181	-0.00519	0.541892	-1.12046
13397654	AT2G27035	5.67691	6.0457	5.80112	5.80125	6.29842	5.84836	5.86226	6.145	5.97909	5.84095	6.37809	5.61257	5.28992	6.49326	6.37042	6.16667	5.86456	5.26323	6.03948	5.58124	6.24522	5.88045	5.83392	5.07565	-0.386988	0.447559	0.569297	0.365417	-0.43386	-0.585129	0.185355	0.099299	0.177973	0.039694	0.079668	-0.235798	0.749556	-0.912021	-0.125197	-0.286222	-0.030641	-0.187581	0.564201	-1.01132	-0.30317	-0.325916	-0.110309	0.048217
13397740	AT2G27200	7.32219	7.48884	7.44774	6.92652	5.9166	5.96399	7.29707	7.67735	7.24793	7.18506	6.24327	6.74027	5.65093	6.42759	6.45387	6.13973	5.83703	6.25421	6.56941	6.55474	6.38273	6.41233	5.96107	6.08505	-1.67127	-1.06125	-0.993866	-0.786791	-0.079563	0.290224	-0.025123	0.188506	-0.199812	0.258534	0.32668	0.776277	0.918486	0.127146	-0.071146	0.272601	0.124034	-0.169162	0.943609	-0.06136	0.128666	0.014067	-0.202646	-0.945439
13397835	AT2G27380	6.01903	6.94324	6.321	6.55781	6.58328	7.23232	6.3859	7.85581	7.00376	6.89177	5.79394	5.98364	6.08049	5.9965	6.68263	6.52393	6.32871	6.88701	7.03522	5.70563	5.55176	5.83712	7.61486	6.32496	0.061456	-0.946737	0.361631	-0.033888	-0.254565	-0.345312	0.366871	0.912569	0.682767	0.333952	-0.78934	-1.24869	0.954734	-0.290867	-1.13087	-0.686808	1.28615	-0.562048	0.587863	-1.20344	-1.81364	-1.02076	2.07549	0.686638
13398112	AT2G28210	8.67144	8.6774	9.27439	8.57352	9.03352	9.30277	8.41883	8.55688	9.18207	8.93099	9.70093	10.2597	8.55499	8.06747	7.75869	7.77366	8.05409	8.15206	9.52895	8.66581	8.22804	9.01382	8.45476	10.4245	-0.116445	-0.609929	-1.5157	-0.799858	-0.979433	-1.1507	-0.252605	-0.120519	-0.092319	0.357474	0.667404	0.956885	0.973964	0.598339	0.46935	1.24017	0.40067	2.27239	1.22657	0.718858	0.561669	0.882692	-0.266734	1.3155
13398253	AT2G28355	2.55059	2.68631	2.32611	2.47521	2.74545	2.4424	2.4847	2.74686	2.5086	2.34269	2.3827	2.54837	3.24812	2.80753	2.7669	2.83537	2.47521	2.4869	2.5086	2.52114	2.99117	2.5086	2.45778	2.53503	0.697528	0.121222	0.440797	0.36016	-0.270237	0.044493	-0.065892	0.060553	0.182492	-0.132524	-0.362751	0.105966	-0.739523	-0.286387	0.224265	-0.326772	-0.01743	0.048138	-0.673631	-0.34694	0.041773	-0.194248	0.345321	-0.057828
13398498	AT2G29125	4.51441	4.29956	4.74958	4.24045	4.18576	4.58701	4.22232	4.19386	4.17774	3.8561	3.98054	3.9576	4.35673	4.14273	4.67411	4.39331	4.16261	3.71016	3.58992	3.90502	4.01306	4.12463	4.36525	4.08998	-0.15768	-0.156833	-0.07547	0.152866	-0.023152	-0.876847	-0.292084	-0.105704	-0.57185	-0.384348	-0.205223	-0.629404	-0.766808	-0.237707	-0.661051	-0.268684	0.202647	0.379823	-0.474724	-0.132003	-0.089201	0.115664	0.40787	1.00923
13398584	AT2G29350	3.40038	3.2165	3.37649	2.80613	3.22269	4.2146	3.81535	3.52597	4.62599	2.91466	5.00332	8.02586	4.98662	4.47277	5.00207	5.3879	5.57923	7.0805	6.2676	5.81658	5.55368	5.83222	7.14735	8.92486	1.58624	1.25628	1.62558	2.58178	2.35654	2.8659	0.414965	0.309469	1.2495	0.108537	1.78063	3.81125	1.28097	1.34381	0.551601	0.444316	1.56812	1.84436	0.86601	1.03434	-0.697895	0.335779	-0.21251	-1.96689
13398924	AT2G30300	3.69374	4.04683	3.9064	4.19042	3.98503	5.50828	3.92682	4.03011	3.79104	3.7189	3.9535	4.53523	3.81042	3.69713	3.93533	4.32549	3.92046	4.4826	4.61667	3.79949	4.10449	4.02948	4.00227	4.74532	0.116682	-0.349704	0.028924	0.135071	-0.064569	-1.02568	0.233082	-0.016722	-0.115364	-0.471517	-0.031531	-0.973052	0.806249	0.102369	0.169163	-0.296011	0.081809	0.262721	0.573167	0.119091	0.284527	0.175506	0.11334	1.23577
13399031	AT2G30690	4.99946	5.58844	5.21785	5.10966	5.31057	5.19739	4.73777	6.02567	4.94512	4.66254	5.40412	5.50974	5.84425	5.36964	5.39961	5.34496	5.35362	5.5011	5.15719	5.63201	5.61861	5.39471	5.08731	5.20162	0.844796	-0.218801	0.181752	0.235303	0.043046	0.303703	-0.26169	0.437232	-0.272736	-0.447113	0.093549	0.312351	-0.687068	0.262373	0.219006	0.049748	-0.266308	-0.29947	-0.425378	-0.174859	0.491742	0.496861	-0.359857	-0.611821
13399052	AT2G30766	7.24659	6.75417	7.89255	9.24818	9.408	7.74213	6.86149	5.9948	7.03355	8.93272	9.17775	8.40131	6.57412	5.89329	6.24843	8.03546	7.84927	7.78986	7.39669	5.75965	6.12987	6.45159	7.76087	8.09052	-0.672472	-0.860885	-1.64412	-1.21273	-1.55873	0.047728	-0.385107	-0.759369	-0.859003	-0.315461	-0.230248	0.659183	0.822569	-0.133637	-0.118562	-1.58387	-0.088404	0.300661	1.20768	0.625732	0.740441	-1.26841	0.141844	-0.358522
13399102	AT2G30910	4.55511	4.38708	4.60337	4.25654	4.68996	4.292	4.292	3.52199	4.75244	4.40255	4.58234	4.85627	2.90789	4.07767	3.53759	3.72136	4.15103	3.90213	4.04526	3.9008	3.38705	3.9948	4.09601	4.35112	-1.64722	-0.309415	-1.06579	-0.535185	-0.538932	-0.389873	-0.263109	-0.865089	0.149064	0.146009	-0.107628	0.564274	1.13737	-0.176863	-0.150536	0.273443	-0.055021	0.448996	1.40047	0.688226	-0.2996	0.127434	0.052607	-0.115278
13399143	AT2G30945	7.9271	7.93004	8.29958	8.17235	7.62202	7.26055	7.80253	7.69228	7.66275	8.35763	7.55414	7.86366	5.68952	6.41738	6.27423	6.30675	6.0897	6.65313	6.31958	6.64135	6.17583	6.64231	6.17593	5.95614	-2.23758	-1.51265	-2.02535	-1.86561	-1.53232	-0.607415	-0.12457	-0.237761	-0.636832	0.185277	-0.067884	0.603114	0.630057	0.223971	-0.098397	0.335564	0.086222	-0.696998	0.754627	0.461732	0.538435	0.150287	0.154106	-1.30011
13399209	AT2G31050	4.24289	3.95094	4.30764	4.09801	4.01273	4.7179	3.96616	5.3222	4.67989	4.23547	4.03018	5.30642	5.09042	4.84609	4.27307	4.18387	4.87199	3.78889	4.33413	4.20605	3.71112	3.93445	4.91018	4.31586	0.847526	0.895152	-0.034578	0.085865	0.859262	-0.929017	-0.276726	1.37126	0.372242	0.13746	0.017453	0.588514	-0.756284	-0.640041	-0.56195	-0.249423	0.038188	0.526972	-0.479558	-2.0113	-0.934192	-0.386883	0.020735	-0.061542
13399460	AT2G31770	3.42551	3.64657	4.01652	3.24295	3.03806	3.62062	2.95797	3.19093	3.31826	3.29845	3.41779	3.48497	3.87968	3.35862	3.90427	3.666	3.11879	2.90378	3.03055	3.68782	3.30567	2.92764	3.22553	3.50938	0.454168	-0.287951	-0.112248	0.423041	0.080725	-0.716842	-0.467541	-0.45564	-0.698259	0.055499	0.379733	-0.135658	-0.849122	0.329196	-0.598601	-0.73836	0.106743	0.605598	-0.381581	0.784836	0.099658	-0.793859	-0.27299	0.741256
13399522	AT2G31940	3.50889	3.67475	3.75777	3.38778	4.38429	3.26932	4.02728	3.17585	3.45448	3.66336	3.58642	3.58501	3.95544	3.77623	4.05501	4.47657	4.2133	4.0252	3.28052	3.84413	4.23334	4.25152	4.23501	4.51124	0.446558	0.101481	0.297239	1.08879	-0.170992	0.75588	0.518398	-0.49889	-0.303292	0.275574	-0.797875	0.31569	-0.674923	0.0679	0.178322	-0.225046	0.02171	0.48604	-1.19332	0.56679	0.481614	-0.50062	0.819585	0.17035
13399525	AT2G31945	4.04226	4.45436	4.24424	3.63375	4.25597	3.41399	4.36294	4.58324	4.60033	4.2448	3.56204	4.79882	5.38257	5.50717	5.55405	5.10518	5.15193	4.39616	6.5555	6.50975	5.79984	6.09596	4.77234	6.0098	1.34031	1.05281	1.30981	1.47143	0.895964	0.982177	0.320681	0.128874	0.356093	0.611052	-0.693925	1.38483	1.17293	1.00258	0.245787	0.990776	-0.379588	1.61364	0.852251	0.873703	-0.110306	0.379724	0.314337	0.228808
13399685	AT2G32190	5.09434	4.77857	3.97808	4.41246	4.30064	4.0438	4.99728	4.67757	4.71199	4.34516	3.80715	4.97676	5.2414	4.99606	5.0385	5.17171	4.16104	4.64857	6.39609	5.43459	5.11383	5.34995	4.73369	5.99862	0.147066	0.217485	1.06043	0.759249	-0.139601	0.604765	-0.097052	-0.101003	0.733907	-0.067307	-0.493495	0.932958	1.15468	0.438526	0.075326	0.178234	0.572653	1.35005	1.25174	0.539529	-0.658581	0.245541	1.06615	0.417091
13400127	AT2G32990	7.61385	7.95202	8.53583	8.59602	9.51073	9.7538	7.58012	7.56277	7.87219	8.24738	9.84651	9.73716	7.49085	7.72471	7.40515	8.67392	9.46852	8.77032	6.72762	7.18485	7.78223	8.34997	9.11506	8.53095	-0.122995	-0.227315	-1.13068	0.077904	-0.042208	-0.983478	-0.033729	-0.389256	-0.663632	-0.34864	0.335777	-0.016638	-0.763234	-0.539862	0.377082	-0.323949	-0.353459	-0.239367	-0.729505	-0.150606	1.04071	0.024691	-0.689236	-0.222729
13400192	AT2G33280	5.09741	4.88324	5.06907	5.96659	5.70614	6.40911	5.26549	5.36682	4.88321	5.33939	5.47364	5.77161	5.81102	5.08718	4.66628	5.50189	5.45283	5.78872	5.0607	4.69869	5.13381	5.36331	5.4642	5.71675	0.713613	0.203936	-0.402788	-0.464701	-0.253311	-0.620389	0.168083	0.483579	-0.185867	-0.627195	-0.232507	-0.637498	-0.750313	-0.388488	0.467529	-0.138576	0.01137	-0.071969	-0.918396	-0.872067	0.653396	0.488619	0.243877	0.565529
13400339	AT2G33640	5.46691	5.5558	5.87655	5.75066	5.42916	5.89299	5.51556	5.72706	4.96738	5.29862	5.0203	5.60106	6.98653	5.9237	6.37972	6.45018	5.86166	6.0532	5.29476	6.41605	6.42739	6.12088	5.82282	5.86633	1.51962	0.367908	0.503174	0.699519	0.432502	0.160208	0.048642	0.171259	-0.909168	-0.452048	-0.408857	-0.291931	-1.69178	0.492345	0.047674	-0.329302	-0.038839	-0.186867	-1.74042	0.321086	0.956842	0.122746	0.370018	0.105064
13400372	AT2G33680	4.95801	5.96823	5.44441	5.26832	4.65731	4.48667	4.89635	5.364	5.67733	5.40211	4.96314	4.53483	5.62234	5.18086	5.18956	5.16575	4.95712	5.11095	4.78409	5.25121	5.76931	5.64073	4.9114	5.39251	0.664336	-0.787363	-0.254851	-0.102561	0.29981	0.624275	-0.061663	-0.60423	0.232925	0.133798	0.305831	0.048163	-0.838257	0.07035	0.579752	0.474978	-0.045722	0.281564	-0.776594	0.67458	0.346827	0.34118	-0.351553	0.233401
13400494	AT2G34190	6.82211	6.95797	7.16429	7.44671	6.59505	6.99376	6.46384	6.45483	6.97716	7.14016	7.02788	6.29188	7.19542	6.58646	7.2103	7.85416	7.55349	7.2523	6.4048	6.71507	7.40508	7.86088	7.03768	7.22223	0.373309	-0.37151	0.046004	0.407447	0.958437	0.258534	-0.358277	-0.50314	-0.187136	-0.306553	0.432829	-0.701879	-0.790623	0.128618	0.194781	0.006722	-0.515806	-0.030068	-0.432346	0.631758	0.381917	0.313275	-0.948635	0.671811
13400627	AT2G34360	7.63141	7.14086	7.15524	8.38964	6.97244	7.67589	7.60054	7.74909	7.12034	8.90704	7.13333	8.55846	6.8396	6.99036	7.62807	8.23368	6.16369	7.33089	8.12613	8.39876	8.25958	8.98231	7.17759	8.27011	-0.791813	-0.150499	0.472832	-0.155954	-0.808758	-0.344998	-0.030873	0.608236	-0.034904	0.517398	0.160885	0.882579	1.28653	1.4084	0.631509	0.748624	1.0139	0.939226	1.31741	0.800167	0.666413	0.231226	0.853016	0.056647
13400817	AT2G34825	2.85818	3.05556	3.19416	3.06235	3.32266	3.02406	3.10934	3.14953	3.35641	2.73388	2.97127	3.12268	4.31427	3.66387	3.87547	3.82332	3.18924	4.02303	3.53657	3.37645	3.37657	3.51233	3.23517	3.10595	1.45608	0.608308	0.681308	0.76097	-0.13342	0.998976	0.25116	0.093969	0.162252	-0.328468	-0.351391	0.098623	-0.777701	-0.287416	-0.498897	-0.310986	0.045928	-0.917077	-1.02886	-0.381385	-0.661149	0.017482	0.397319	-1.0157
13400906	AT2G35070	7.16632	7.34941	6.61772	6.3275	8.39481	8.92757	7.46491	7.77072	6.34761	6.71386	8.45608	9.28101	7.39569	8.1133	7.33263	6.76566	8.25916	8.02199	8.10782	8.11856	7.29389	7.55778	8.11909	8.87993	0.229373	0.763887	0.714908	0.438164	-0.135654	-0.905576	0.298598	0.421306	-0.270109	0.386366	0.061265	0.353445	0.712132	0.005259	-0.038743	0.79212	-0.140069	0.857938	0.413534	-0.416047	0.231366	0.405754	-0.201334	0.504493
13401632	AT2G36690	6.067	6.20694	5.79064	5.74171	6.15764	4.98145	6.62892	7.3188	8.12887	6.0818	5.95253	5.77769	6.64751	6.65965	5.78818	6.0695	5.72524	5.17501	7.47587	7.04689	6.96976	6.14743	6.43314	6.08216	0.580507	0.452706	-0.002465	0.327793	-0.432407	0.193562	0.561914	1.11186	2.33823	0.340094	-0.205112	0.796247	0.828361	0.387241	1.18159	0.077926	0.7079	0.907154	0.266447	-0.724616	-1.15664	-0.262168	0.913012	0.110907
13402027	AT2G37590	4.20715	4.2892	4.16972	4.55203	4.38981	4.09068	4.62518	3.71472	3.99397	4.12144	4.07371	3.98089	4.1741	4.804	4.43673	4.5558	4.3218	4.22243	4.86103	4.24424	4.20901	4.69713	4.17565	4.42685	-0.033051	0.514804	0.26701	0.003771	-0.068009	0.131746	0.418031	-0.574477	-0.175756	-0.430589	-0.316104	-0.109795	0.686928	-0.559762	-0.227729	0.141326	-0.146156	0.204423	0.268897	0.014715	-0.051973	0.571915	0.169948	0.314218
13402061	AT2G37750	6.21178	5.15504	4.53283	5.3356	5.25196	5.02498	5.91425	5.28166	5.51925	5.44634	5.65033	7.02972	5.74758	6.07896	6.23855	6.65346	6.54251	6.64901	6.5617	6.67145	6.9809	6.95912	6.60229	8.34138	-0.464199	0.923923	1.70572	1.31785	1.29055	1.62403	-0.297533	0.126619	0.986425	0.110735	0.398371	2.00474	0.814112	0.592487	0.742355	0.305661	0.05978	1.69237	1.11164	0.465868	-0.24407	0.194926	-0.338591	-0.312363
13402064	AT2G37760	6.24977	6.31621	6.73189	6.75607	6.86761	7.98227	6.13746	6.46018	7.18407	6.93417	7.92991	8.84289	6.05658	6.75628	7.10626	6.70137	7.15799	8.12575	6.7661	7.21469	7.57548	7.27056	7.83444	8.68919	-0.19319	0.440069	0.374371	-0.054699	0.290382	0.143482	-0.11231	0.143962	0.452183	0.178097	1.0623	0.860617	0.70952	0.458404	0.469221	0.569185	0.676445	0.563432	0.82183	0.314442	0.017038	0.391088	-0.385855	-0.297185
13402136	AT2G37910	5.54272	5.75393	5.57172	5.76993	5.24118	5.93531	5.37795	6.71175	5.18315	5.57377	5.37518	5.2776	5.50519	4.90981	5.82676	5.45025	5.79066	6.22966	6.19322	5.10147	5.57488	5.827	6.12537	4.76681	-0.037534	-0.844123	0.255039	-0.319678	0.549488	0.294353	-0.16477	0.957826	-0.388562	-0.196162	0.134006	-0.657703	0.688034	0.19167	-0.251878	0.376748	0.334702	-1.46285	0.852804	-0.766156	0.136684	0.57291	0.200696	-0.805144
13402155	AT2G37970	8.57564	8.21776	8.56586	8.85793	9.32187	9.36462	8.9385	8.4988	9.01818	9.28805	9.53944	9.96837	9.03428	8.97442	9.15159	9.17818	9.79757	10.1126	9.80862	9.25243	9.23133	9.76094	10.0028	10.2827	0.458644	0.756653	0.585732	0.320251	0.475702	0.747946	0.362864	0.281032	0.452328	0.430121	0.217569	0.603742	0.774344	0.27801	0.079746	0.582758	0.205241	0.17012	0.41148	-0.003022	-0.372582	0.152637	-0.012328	-0.433622
13402401	AT2G38544	2.56527	2.83257	2.62589	2.82782	2.5215	2.7327	2.9799	2.55772	3.55537	2.59996	2.59883	2.74187	2.56024	3.18418	2.6681	3.10865	2.73569	2.47835	3.36553	2.98108	2.56549	2.75167	2.40203	2.92541	-0.005033	0.351618	0.042213	0.280833	0.214193	-0.254358	0.414628	-0.274846	0.92948	-0.227862	0.077328	0.009169	0.805288	-0.203103	-0.102609	-0.356978	-0.333664	0.447062	0.39066	0.071743	-1.03209	-0.129116	-0.410992	0.437893
13402440	AT2G38620	3.53887	3.8418	3.56147	3.79686	3.53839	3.69274	3.53001	3.51521	3.66974	3.53887	3.46387	3.9695	3.14877	3.36464	3.27691	3.86573	3.52363	3.95411	3.86742	3.65237	3.37073	3.68024	3.54661	3.63609	-0.390104	-0.477156	-0.284559	0.06887	-0.014761	0.261369	-0.008861	-0.326588	0.108268	-0.257992	-0.074524	0.276768	0.718653	0.287727	0.09382	-0.185495	0.022974	-0.318015	0.727514	0.614315	-0.014448	0.072497	0.097498	-0.594783
13402489	AT2G38720	5.83049	5.07111	5.35378	6.37477	5.75032	6.03798	5.26627	5.80508	5.29581	5.44785	5.75756	6.01852	7.19078	6.69594	6.75937	7.95772	7.43822	7.2866	6.09028	6.41472	6.94077	7.54879	7.54502	7.37767	1.3603	1.62484	1.40559	1.58295	1.6879	1.24862	-0.564213	0.733971	-0.057974	-0.926918	0.007239	-0.019461	-1.1005	-0.28122	0.181397	-0.408932	0.106801	0.091073	-0.536291	-1.01519	0.239371	0.517986	0.099562	0.110534
13402503	AT2G38760	4.56689	4.81533	5.78537	4.91172	6.18531	5.89978	4.3734	4.47982	5.37234	5.65824	7.20586	7.86569	4.57474	5.82633	6.26682	5.62373	6.8006	6.73086	5.25876	5.89317	6.16164	6.61118	7.6361	7.90038	0.007855	1.011	0.481445	0.712006	0.615283	0.831075	-0.193494	-0.335507	-0.413029	0.746513	1.02054	1.96591	0.684016	0.066836	-0.105176	0.987454	0.835502	1.16952	0.87751	0.402343	0.307853	0.240941	-0.185042	-0.796387
13402643	AT2G39030	7.18673	7.08132	7.60875	6.94527	8.22568	7.70453	7.57362	7.97549	8.28642	8.75288	11.215	12.1381	5.43866	6.06832	5.65497	4.95851	5.77763	8.2758	6.91105	6.62834	6.57897	8.85166	10.9216	11.6187	-1.74807	-1.013	-1.95379	-1.98676	-2.44804	0.571276	0.386892	0.894164	0.67767	1.80761	2.9893	4.43357	1.47239	0.560016	0.924009	3.89315	5.14395	3.34285	1.0855	-0.334148	0.246339	2.08554	2.15464	-1.09073
13402936	AT2G39820	4.08329	4.68342	4.71483	4.56234	3.96338	3.9432	4.62503	4.53699	4.54985	4.76383	4.63118	4.24369	4.0368	4.87141	4.83017	4.93952	4.62999	4.68278	4.7007	5.10194	4.74585	4.46582	4.56802	4.36562	-0.046491	0.187985	0.115341	0.37718	0.666614	0.739578	0.54174	-0.146434	-0.164979	0.201487	0.667805	0.300494	0.663897	0.23053	-0.084323	-0.473704	-0.061972	-0.317153	0.122157	0.376964	0.080656	-0.675191	-0.729777	-0.617647
13403154	AT2G40180	5.95819	5.17726	5.40633	5.31089	5.47227	4.99951	6.31627	5.7914	5.30424	5.33523	4.94163	5.24755	6.24987	5.67119	5.25489	5.71798	5.64855	5.53764	7.18487	5.81635	5.52271	5.65031	5.8176	5.87999	0.291684	0.493929	-0.151436	0.407092	0.176275	0.538128	0.358083	0.614139	-0.102087	0.024341	-0.530639	0.248037	0.935002	0.145157	0.267812	-0.067667	0.169052	0.342346	0.576919	-0.468982	0.369899	-0.092008	0.699691	0.094309
13403169	AT2G40200	6.77521	6.47807	6.36031	6.32906	7.02992	6.88169	6.76922	6.49518	6.00106	6.33609	7.63924	8.04681	5.79334	6.07158	6.27397	6.86182	6.84329	7.42489	6.75172	6.18772	6.58085	6.7047	7.5941	7.65276	-0.981876	-0.406494	-0.086344	0.532768	-0.186637	0.543197	-0.005989	0.017107	-0.359249	0.007037	0.609316	1.16511	0.958386	0.116143	0.306885	-0.157127	0.750814	0.227871	0.964375	0.099036	0.666134	-0.164164	0.141498	-0.937243
13403371	AT2G40670	7.86909	6.46105	7.92527	7.71995	5.25393	6.54135	7.43248	6.46918	7.74662	7.46296	5.45471	5.89358	6.05295	4.96743	5.98034	5.72746	4.03671	5.45769	5.24883	5.10406	6.3395	5.65699	4.57582	5.35346	-1.81614	-1.49362	-1.94493	-1.99249	-1.21722	-1.08366	-0.436607	0.008138	-0.178647	-0.257	0.200776	-0.647766	-0.804114	0.136638	0.35915	-0.070478	0.539107	-0.104222	-0.367507	0.1285	0.537797	0.186522	0.338331	0.543544
13403683	AT2G41310	6.05013	6.35286	6.56587	7.24809	7.28968	7.40636	5.86658	5.71544	6.00353	6.95495	6.94668	7.02736	5.89016	5.65329	6.20225	6.95495	7.12815	7.17316	4.69708	5.55032	5.96079	6.70165	7.07955	6.90111	-0.159974	-0.699572	-0.363624	-0.293144	-0.161526	-0.233206	-0.183546	-0.637418	-0.562342	-0.293144	-0.342994	-0.379006	-1.19307	-0.10297	-0.241452	-0.253296	-0.048605	-0.272048	-1.00953	0.534448	0.32089	0.039848	0.294389	0.106958
13403895	AT2G41730	4.37472	2.76076	3.17766	2.99885	2.94606	2.61269	4.39504	3.57584	3.20328	4.22724	3.04908	2.61025	4.62078	3.09156	3.02293	3.13245	2.20753	2.21621	5.9339	4.65908	3.43193	4.03171	3.46423	3.03756	0.246064	0.330801	-0.154738	0.133599	-0.738526	-0.39648	0.020322	0.815083	0.025619	1.22838	0.10302	-0.002432	1.31312	1.56751	0.409003	0.899261	1.2567	0.82135	1.2928	0.752431	0.383384	-0.329123	1.15368	0.823782
13403913	AT2G41820	7.22095	7.8929	8.08453	8.0776	7.86273	7.7212	7.28877	7.40336	7.71108	8.00356	7.76677	6.678	6.86153	7.36463	7.83086	7.60083	7.55244	7.00495	6.05885	6.76568	7.6861	7.7613	7.30135	6.95694	-0.359421	-0.528277	-0.253665	-0.476769	-0.310289	-0.716253	0.067817	-0.489545	-0.373449	-0.074041	-0.09595	-1.0432	-0.802682	-0.59895	-0.144761	0.160465	-0.251085	-0.048011	-0.870499	-0.109405	0.228688	0.234506	-0.155135	0.995192
13404074	AT2G42320	8.62972	8.2551	8.15803	8.2236	8.07863	8.161	8.54081	8.13332	7.81648	8.13761	8.05191	7.46489	8.50355	7.91358	7.50709	7.97686	7.87684	7.73723	7.79688	7.84514	7.27715	7.70306	7.69287	7.49477	-0.126169	-0.341522	-0.650935	-0.246736	-0.201789	-0.423771	-0.088908	-0.121785	-0.341546	-0.085987	-0.026718	-0.696111	-0.706667	-0.068444	-0.229938	-0.273803	-0.183969	-0.242463	-0.617759	0.053341	0.111608	-0.187816	-0.157251	0.453648
13404191	AT2G42720	5.71311	6.20949	5.59847	5.93763	5.58816	5.7035	5.68086	5.75899	5.19125	5.94131	5.6896	5.78865	6.30072	5.75977	5.91934	5.64881	6.2807	5.76145	5.33665	5.74127	5.87349	5.76763	5.97938	5.74231	0.587611	-0.449723	0.320869	-0.28882	0.69254	0.057948	-0.032256	-0.450497	-0.407227	0.00368	0.101442	0.085148	-0.964078	-0.018502	-0.045848	0.118819	-0.301322	-0.019139	-0.931822	0.431995	0.361379	0.115139	-0.402764	-0.104287
13404541	AT2G43510	8.45913	8.67573	9.05497	8.7026	9.11158	8.63424	8.37822	9.13927	9.47012	9.04991	9.92911	10.9208	7.83731	8.47444	8.86403	8.63047	8.90445	8.85055	8.5213	8.90707	9.34778	9.23219	9.94339	11.0354	-0.621816	-0.201286	-0.190938	-0.07213	-0.207134	0.21631	-0.080913	0.463537	0.415148	0.347315	0.817527	2.28655	0.683985	0.432626	0.48375	0.601728	1.03895	2.18481	0.764898	-0.030911	0.068602	0.254413	0.221418	-0.10174
13404545	AT2G43520	9.10905	8.34973	8.39181	8.53671	8.01736	6.65356	9.14464	8.87779	8.1179	8.44095	7.70871	6.90418	8.05967	7.78982	7.41075	7.60327	7.07505	6.99519	8.8422	8.55891	8.0128	7.96249	7.79199	6.97659	-1.04938	-0.559912	-0.981064	-0.933443	-0.942319	0.341638	0.035597	0.528064	-0.273906	-0.095764	-0.308652	0.250627	0.782529	0.769095	0.602053	0.359215	0.716947	-0.018605	0.746932	0.241031	0.875959	0.454979	1.0256	-0.269232
13404605	AT2G43690	4.67082	4.97081	5.14641	5.75326	5.67496	5.35326	4.85508	4.93939	5.11198	5.67746	5.30413	5.37636	5.14155	4.99928	4.76607	4.67361	4.97898	5.28793	4.11843	4.80033	5.52977	5.20829	5.13499	4.78873	0.47073	0.028463	-0.380345	-1.07965	-0.69598	-0.06533	0.184256	-0.031425	-0.034425	-0.075803	-0.37083	0.023102	-1.02312	-0.198944	0.763707	0.534677	0.156016	-0.499198	-1.20738	-0.167519	0.798132	0.61048	0.526846	-0.5223
13404837	AT2G44304	4.22499	5.11443	4.44487	4.68212	4.96107	4.56283	4.35396	4.33572	4.76935	4.5111	4.85733	4.53281	5.00273	4.46162	4.37556	5.19323	5.17354	4.9785	4.31101	5.19761	4.99356	4.68212	4.43381	4.68212	0.777744	-0.652804	-0.069314	0.511112	0.212471	0.415665	0.128972	-0.778709	0.32448	-0.17102	-0.103743	-0.030026	-0.691723	0.735985	0.617996	-0.511112	-0.739736	-0.296379	-0.820695	1.51469	0.293516	-0.340092	-0.635993	-0.266353
13404901	AT2G44460	4.08907	4.45251	4.53608	5.03901	4.59483	4.93119	4.11407	4.3164	4.21955	4.76345	3.85011	4.03759	5.7208	5.27393	4.94486	5.85043	4.94289	6.13853	6.39333	5.12127	4.84107	5.73149	5.42764	6.60082	1.63173	0.821413	0.408778	0.811425	0.348058	1.20734	0.025002	-0.136113	-0.316533	-0.275553	-0.74472	-0.8936	0.672528	-0.152654	-0.103793	-0.118936	0.48475	0.462285	0.647526	-0.016541	0.21274	0.156617	1.22947	1.35589
13405149	AT2G44995	8.13717	8.41002	8.61061	8.84625	8.46091	8.42092	8.49555	8.26938	8.32259	9.07826	8.36795	8.3305	6.66159	7.43358	7.01355	7.60069	7.17711	7.39234	7.4561	7.95145	6.82017	7.28859	7.72858	6.94511	-1.47558	-0.976441	-1.59706	-1.24556	-1.2838	-1.02858	0.358377	-0.140642	-0.288025	0.232015	-0.092956	-0.090413	0.794513	0.517864	-0.193386	-0.312099	0.551474	-0.447223	0.436136	0.658506	0.094639	-0.544114	0.64443	-0.35681
13405220	AT2G45135	4.22789	4.25202	4.07232	4.26574	4.09795	4.80736	4.22574	3.97608	4.1331	3.96373	4.37586	4.19011	4.79658	4.49679	4.54191	4.25393	4.53736	4.06486	4.12084	4.29628	4.23111	4.46586	4.01316	4.24961	0.568695	0.244774	0.469594	-0.011817	0.439412	-0.742507	-0.002143	-0.27594	0.060781	-0.302011	0.277916	-0.617257	-0.675738	-0.20051	-0.310806	0.211937	-0.524201	0.184751	-0.673595	0.07543	-0.371587	0.513948	-0.802117	0.802008
13405654	AT2G46150	5.14707	4.03543	4.00853	4.12787	4.48543	4.55598	4.99017	4.47709	4.69994	4.64456	4.97145	5.4212	4.44313	4.98445	4.78176	5.79551	5.13891	6.16122	5.34915	4.91559	4.93718	5.52506	6.16052	6.90581	-0.703933	0.949018	0.773235	1.66765	0.653483	1.60524	-0.156894	0.441651	0.69141	0.516694	0.486025	0.865224	0.906016	-0.068868	0.155413	-0.270446	1.02161	0.744596	1.06291	-0.510519	-0.535997	-0.78714	0.535583	-0.120628
13405778	AT2G46375	3.49268	5.2774	4.33852	4.15376	5.27248	4.9008	3.16887	5.58524	3.6246	3.1348	3.76618	4.99258	4.52515	4.0852	4.33435	2.78793	4.14831	3.75452	3.11613	3.91998	3.31945	3.63299	4.77815	3.82549	1.03247	-1.19219	-0.004172	-1.36583	-1.12417	-1.14627	-0.323805	0.307842	-0.713922	-1.01896	-1.5063	0.091781	-1.40902	-0.165223	-1.0149	0.845052	0.629837	0.070968	-1.08521	-0.473065	-0.300979	1.86401	2.13614	-0.020813
13406443	AT2G47844	3.98193	5.27202	3.94394	4.39429	3.95378	3.90455	4.43604	4.54456	5.74192	3.88125	4.00746	4.19145	4.60341	5.43554	5.89842	5.03457	4.32845	4.93907	5.30951	5.229	6.59291	4.35774	4.78694	4.40736	0.621485	0.163516	1.95448	0.640279	0.374665	1.03452	0.454115	-0.727458	1.79798	-0.513043	0.053685	0.2869	0.706093	-0.206534	0.694491	-0.676831	0.458496	-0.531711	0.251978	0.520924	-1.10349	-0.163788	0.404811	-0.818611
13406480	AK118012	5.78151	5.43386	5.37463	5.6475	5.20558	5.02517	5.92341	5.87122	5.37874	4.9578	5.08314	5.51877	6.06975	6.13031	5.61967	5.0261	5.80361	5.61967	5.18996	5.95299	6.44512	5.53966	5.45863	6.11903	0.28824	0.696453	0.24504	-0.621406	0.598037	0.5945	0.141903	0.437367	0.004108	-0.689699	-0.122433	0.493595	-0.879789	-0.177321	0.825454	0.513559	-0.344984	0.499361	-1.02169	-0.614688	0.821346	1.20326	-0.222551	0.005766
13407086	AT2G02023	3.33114	3.17709	2.83223	3.42958	3.29151	3.06078	3.33882	3.27877	3.32674	3.18813	3.09413	3.34743	3.52398	2.94787	3.84985	3.73011	3.39581	3.73657	4.17104	3.34743	3.87511	3.57327	3.34819	3.7102	0.192844	-0.229227	1.01762	0.30053	0.104299	0.675785	0.007676	0.101675	0.494514	-0.24145	-0.197377	0.286644	0.647057	0.399563	0.02526	-0.156839	-0.047624	-0.026368	0.639381	0.297888	-0.469254	0.084611	0.149753	-0.313012
13407154	AT2G02310	3.70655	4.69357	4.67866	4.22159	3.89392	4.72006	4.08539	4.8121	4.10858	3.92042	4.22221	4.98827	5.04709	5.03056	4.45809	3.97132	4.90506	4.58684	5.69056	5.16535	3.76835	4.66656	4.44816	4.62262	1.34054	0.336997	-0.220572	-0.250266	1.01113	-0.133228	0.37884	0.118537	-0.570083	-0.301167	0.328282	0.268203	0.64347	0.134789	-0.689744	0.695242	-0.456901	0.035786	0.26463	0.016252	-0.119661	0.996409	-0.785183	-0.232417
13407163	AT2G02340	4.27326	5.23261	4.51959	4.86184	5.26101	5.73698	4.70063	5.6825	4.9581	4.8654	4.86926	5.34452	6.95164	6.08838	5.77474	6.46031	5.6509	6.33725	7.75655	7.16414	6.17849	6.33654	6.07073	6.29587	2.67838	0.855776	1.25514	1.59847	0.389896	0.600271	0.427377	0.44989	0.438506	0.003555	-0.39175	-0.39246	0.804908	1.07576	0.403759	-0.123769	0.419827	-0.041388	0.377531	0.625866	-0.034747	-0.127324	0.811577	0.351072
13407587	AT2G03760	7.13083	6.44086	6.67192	6.5297	6.95962	6.81957	7.26812	6.68491	6.6103	6.5388	6.98141	6.85318	7.25333	6.6052	5.94265	6.68491	6.68491	6.61675	8.13675	7.02534	6.1743	6.66294	6.82218	6.49092	0.122509	0.164342	-0.729271	0.155212	-0.274706	-0.202821	0.137296	0.244052	-0.061622	0.0091	0.021793	0.033614	0.883412	0.420136	0.231648	-0.021973	0.137267	-0.125833	0.746116	0.176084	0.29327	-0.031073	0.115474	-0.159447
13407634	AT2G04050	4.95721	3.98114	4.15414	4.35839	4.45485	4.14234	5.5148	5.00751	4.20556	4.03669	4.56003	4.38689	4.15564	4.22881	4.35981	4.30525	3.79475	4.14665	4.94029	4.41612	4.42454	4.39429	3.85784	3.94814	-0.801566	0.247665	0.20567	-0.053148	-0.660091	0.004311	0.557594	1.02636	0.051421	-0.321702	0.105184	0.244548	0.784645	0.187313	0.064726	0.08905	0.063084	-0.198506	0.227051	-0.839052	0.013305	0.410752	-0.0421	-0.443054
13407884	AT2G04860	6.17965	7.02825	7.41001	6.39523	6.21179	6.14017	5.99797	6.89845	6.93753	6.33026	6.55462	6.63927	6.39419	6.61043	6.49665	6.25183	6.24323	5.92541	5.61415	6.51707	7.22881	6.49836	6.23013	6.09818	0.214545	-0.41782	-0.913354	-0.143398	0.031442	-0.214757	-0.181677	-0.129798	-0.472472	-0.064967	0.342828	0.499099	-0.780048	-0.093355	0.732158	0.246529	-0.013096	0.172761	-0.598371	0.036443	1.20463	0.311496	-0.355924	-0.326338
13407923	AT2G05100	6.91578	6.76341	6.02629	4.59403	6.91364	6.51074	6.97867	6.53895	5.99457	4.47757	6.64632	6.63262	5.36761	5.33507	3.76872	3.98552	5.94536	5.7441	6.03251	5.17837	4.01904	3.18622	5.54326	5.54933	-1.54816	-1.42834	-2.25758	-0.608511	-0.968286	-0.766637	0.062895	-0.224459	-0.03172	-0.116459	-0.267319	0.121884	0.664891	-0.156701	0.250327	-0.799298	-0.402091	-0.194776	0.601996	0.067758	0.282047	-0.682839	-0.134772	-0.31666
13407972	AT2G05310	9.0601	9.08127	9.57545	8.66444	9.66966	9.46793	9.09402	8.86896	9.38252	9.16273	9.46131	8.93735	5.82051	6.21263	6.52304	6.76001	7.09127	6.68286	6.74489	6.88859	6.29176	6.5996	7.00625	6.43958	-3.23959	-2.86864	-3.0524	-1.90443	-2.57839	-2.78507	0.033922	-0.212316	-0.192929	0.498286	-0.208346	-0.53058	0.924378	0.675967	-0.231286	-0.160411	-0.085022	-0.243278	0.890456	0.888283	-0.038357	-0.658697	0.123324	0.287302
13408156	AT2G06570	3.85631	3.84691	3.76063	3.37184	3.94313	4.06747	3.60889	4.54656	3.70421	4.07077	3.46961	3.48339	3.57836	3.73605	3.54558	4.16336	3.53324	3.81727	4.46023	3.53582	3.4292	3.5252	4.73573	3.96656	-0.277944	-0.110858	-0.215051	0.791515	-0.409881	-0.250203	-0.247418	0.69965	-0.056424	0.698928	-0.473515	-0.584078	0.881862	-0.200233	-0.116378	-0.638156	1.20249	0.149288	1.12928	-0.899883	-0.059954	-1.33708	1.676	0.733366
13408193	AT2G07042	7.70326	7.79782	7.89043	6.98873	7.93742	7.50713	7.69529	7.91581	7.71494	6.86833	7.79475	6.52486	3.91676	3.42082	3.34751	3.46727	3.5316	3.48368	3.00674	3.20338	3.50292	3.73587	3.61967	3.47454	-3.7865	-4.377	-4.54292	-3.52146	-4.40583	-4.02345	-0.007967	0.117996	-0.17549	-0.120396	-0.142678	-0.982263	-0.910022	-0.217436	0.155419	0.268601	0.088075	-0.009134	-0.902055	-0.335432	0.330909	0.388997	0.230753	0.973129
13408481	AT2G10930	5.22984	4.83473	5.09916	4.80441	4.72428	4.59051	5.13119	4.32184	4.82308	4.58436	4.29629	4.23227	4.05094	4.16738	4.66453	4.86075	5.00805	4.20172	4.71672	3.88435	3.62558	3.84068	5.1042	4.70897	-1.1789	-0.66735	-0.434627	0.056344	0.283769	-0.3888	-0.098659	-0.512895	-0.276082	-0.220046	-0.427987	-0.358242	0.665781	-0.283032	-1.03896	-1.02008	0.096154	0.507258	0.76444	0.229863	-0.762873	-0.800032	0.524141	0.8655
13408621	AT2G13126	5.21447	5.18603	5.61299	5.13779	5.33228	5.46838	5.39335	5.53852	5.54996	5.19894	5.229	5.55665	5.42204	5.34314	4.68428	5.60317	5.03136	4.98284	4.509	5.2548	5.23323	4.86055	5.40071	5.13174	0.207575	0.157111	-0.928715	0.465384	-0.300919	-0.485544	0.178884	0.352483	-0.063029	0.061151	-0.103281	0.088265	-0.913042	-0.088349	0.548956	-0.742621	0.369351	0.148899	-1.09193	-0.440832	0.611985	-0.803772	0.472632	0.060634
13409075	AT2G15740	2.74072	2.49516	2.67829	2.40574	2.64619	2.71615	2.42468	2.8596	2.62607	2.57005	2.38809	2.10565	3.35092	2.58986	2.66886	2.72032	2.98061	2.69484	2.46101	2.55286	2.74012	2.74552	2.8283	2.63815	0.610201	0.0947	-0.009431	0.314583	0.334422	-0.021307	-0.316042	0.364438	-0.052219	0.164313	-0.258098	-0.610501	-0.889909	-0.037006	0.07126	0.025197	-0.152309	-0.056688	-0.573867	-0.401444	0.123479	-0.139116	0.105789	0.553813
13409077	AT2G15760	5.18236	4.77581	5.02491	5.63821	4.79443	5.33204	5.64466	5.58842	6.16445	6.01152	5.89694	6.1811	5.96708	5.88412	6.03396	5.73843	5.31935	5.23532	6.61956	6.50969	6.8611	6.76798	5.87308	6.08048	0.784719	1.10831	1.00905	0.100224	0.52492	-0.096716	0.462294	0.812601	1.13955	0.373309	1.10252	0.849068	0.652478	0.625569	0.82714	1.02955	0.553737	0.845155	0.190184	-0.187032	-0.312405	0.656237	-0.548779	-0.003913
13409150	AT2G16018	2.95085	2.92056	2.9961	3.00505	3.05971	2.95009	2.95404	2.86425	2.75948	3.04887	3.13795	3.00586	3.77004	3.06357	3.3738	3.21744	3.24504	3.05663	3.00645	3.17969	3.47654	3.22572	3.02114	3.12578	0.819189	0.14301	0.377693	0.21239	0.185339	0.106538	0.003195	-0.056313	-0.236624	0.043823	0.078249	0.055772	-0.763584	0.116113	0.102748	0.008285	-0.223906	0.069154	-0.766779	0.172426	0.339372	-0.035538	-0.302155	0.013382
13409394	AT2G16720	4.4161	3.96396	4.33491	3.29548	4.85164	4.64048	4.04579	4.27301	4.47892	3.4337	4.78387	5.62022	4.49068	5.05049	4.71502	3.66554	5.36544	5.21788	5.35109	5.43858	5.00052	4.05294	5.21304	5.91874	0.074582	1.08653	0.380109	0.37007	0.513799	0.577406	-0.370314	0.309054	0.144008	0.138226	-0.067771	0.979741	0.860412	0.388086	0.285498	0.387397	-0.152403	0.700856	1.23073	0.079032	0.14149	0.249171	-0.084632	-0.278885
13409453	AT2G16900	8.15165	7.88056	8.21412	8.4047	8.18913	7.8148	8.1001	7.98103	8.12886	8.47832	8.2009	8.23888	8.26391	7.81175	7.62391	8.21258	8.04234	8.0132	8.90659	8.26993	8.24486	8.40406	8.43799	8.92624	0.112262	-0.068809	-0.590208	-0.19212	-0.146781	0.198404	-0.051556	0.100472	-0.085265	0.073617	0.011771	0.42408	0.642675	0.45818	0.620944	0.191485	0.395648	0.913039	0.694231	0.357708	0.706209	0.117868	0.383877	0.488959
13409733	AT2G17600	3.59433	3.82263	3.77143	3.98794	3.56147	3.93034	3.41253	3.45277	3.49962	3.27291	3.10948	4.09288	3.54638	2.96276	3.01357	3.14425	2.68874	3.10391	2.74834	2.74834	3.10976	2.97973	3.20257	3.2656	-0.047955	-0.85987	-0.757861	-0.843691	-0.872734	-0.826436	-0.181799	-0.369866	-0.271812	-0.715031	-0.451986	0.16254	-0.798041	-0.214426	0.096183	-0.164528	0.513837	0.161697	-0.616242	0.15544	0.367995	0.550503	0.965823	-0.000843
13409853	AT2G17900	7.3839	7.64372	7.78552	6.88668	7.4013	6.85488	7.4177	7.88131	7.92584	6.62298	7.08909	6.68696	7.76896	8.21274	8.25553	6.30557	7.79811	7.41899	8.41241	8.20996	8.46155	6.48467	7.96973	6.71043	0.385054	0.569012	0.470011	-0.58111	0.396809	0.564111	0.033804	0.237581	0.140317	-0.263706	-0.312208	-0.167915	0.64346	-0.002773	0.206018	0.179099	0.171618	-0.708558	0.609656	-0.240354	0.065701	0.442805	0.483826	-0.540643
13409905	AT2G17960	2.61471	2.58506	2.45416	2.65468	2.8881	2.69806	2.58174	2.73444	2.6528	2.55391	2.41831	2.41138	3.00379	2.83826	2.60866	2.69938	2.39797	2.46437	2.33388	2.71428	2.41447	2.51371	2.53439	2.40519	0.389075	0.2532	0.154493	0.044701	-0.490128	-0.233682	-0.032977	0.149373	0.198635	-0.100768	-0.469787	-0.286677	-0.669904	-0.123986	-0.194181	-0.185672	0.136416	-0.059184	-0.636927	-0.273359	-0.392816	-0.084904	0.606203	0.227493
13409967	AT2G18180	5.2637	5.16045	4.62735	5.62495	3.91079	4.45243	5.44115	4.03793	4.65731	4.5519	4.21037	4.64057	5.3007	3.82154	4.57357	4.12363	4.48312	4.66304	4.61675	4.08237	4.1096	4.14032	4.37352	4.0345	0.036993	-1.33891	-0.053783	-1.50133	0.572327	0.210613	0.177444	-1.12252	0.029959	-1.07306	0.299577	0.188136	-0.683944	0.260823	-0.463975	0.016695	-0.109602	-0.628541	-0.861388	1.38334	-0.493934	1.08975	-0.409179	-0.816677
13409981	AT2G18193	5.06389	3.39766	3.35012	3.24106	4.06214	3.48393	5.14644	4.46981	3.83569	3.61415	3.67487	4.11419	6.54716	5.546	5.14374	4.48272	4.41579	4.46347	7.3218	6.47393	5.17658	5.23164	4.67448	4.72465	1.48327	2.14834	1.79361	1.24166	0.353644	0.979546	0.082546	1.07215	0.485565	0.373088	-0.387271	0.630267	0.774643	0.927934	0.032844	0.748914	0.258691	0.261178	0.692097	-0.144215	-0.452721	0.375826	0.645962	-0.369089
13410155	AT2G18720	5.68737	6.02829	5.7555	5.5013	5.34165	6.43428	5.78093	5.7555	5.56147	5.7555	5.0599	5.77417	5.10505	5.74563	5.85799	4.19097	5.56081	5.98351	5.93587	5.75221	4.99925	5.19623	6.3236	6.09877	-0.582315	-0.282657	0.102493	-1.31033	0.21916	-0.450767	0.093564	-0.272792	-0.194032	0.254196	-0.281755	-0.660111	0.83082	0.006581	-0.858739	1.00525	0.762783	0.115258	0.737256	0.279373	-0.664707	0.751058	1.04454	0.775369
13410302	AT2G19240	5.68701	5.80723	5.48034	5.29655	5.34876	5.45199	5.55768	5.9081	5.63562	5.55768	5.7148	5.72147	5.85688	5.77644	5.70958	5.73736	5.55768	5.44728	5.19409	4.82035	5.67516	5.52248	4.90562	5.30208	0.169866	-0.03079	0.229241	0.440812	0.208924	-0.004707	-0.129329	0.100871	0.155284	0.261134	0.366041	0.269485	-0.662784	-0.956091	-0.034416	-0.214877	-0.652068	-0.145197	-0.533455	-1.05696	-0.1897	-0.476011	-1.01811	-0.414682
13410402	AT2G19550	3.64322	3.91216	3.13239	4.39797	3.43016	3.41716	3.50147	4.18325	3.82125	3.52455	3.91966	4.16554	4.42108	4.14005	4.25722	4.30262	3.86466	3.77087	3.66501	4.1669	3.87668	3.85125	3.69437	3.90275	0.777861	0.227884	1.12483	-0.095355	0.434499	0.353712	-0.14175	0.271091	0.688863	-0.873421	0.489501	0.748383	-0.756065	0.026856	-0.380543	-0.451368	-0.170294	0.131886	-0.614315	-0.244235	-1.06941	0.422053	-0.659795	-0.616497
13410429	AT2G19590	8.87529	6.68351	6.93382	6.65578	6.91662	7.2017	8.6083	6.79324	6.97851	6.64814	7.0532	6.55271	7.42304	6.74133	6.9573	6.97203	7.09574	7.15964	6.58225	6.85638	7.21768	6.53953	7.16027	6.5801	-1.45225	0.057819	0.023482	0.31624	0.179121	-0.042061	-0.266999	0.10973	0.044682	-0.007646	0.136581	-0.648995	-0.840798	0.115047	0.260376	-0.432498	0.064536	-0.579538	-0.573799	0.005317	0.215694	-0.424852	-0.072045	0.069457
13410452	AT2G19650	6.70364	6.071	6.42716	7.60476	7.58831	7.78228	6.48231	5.85822	6.72211	7.58236	7.4741	7.80241	6.758	5.60116	5.78424	7.36355	7.65535	7.57921	6.03704	5.71563	6.29087	6.93589	7.68748	7.46408	0.054365	-0.469837	-0.642921	-0.241203	0.067032	-0.203064	-0.221329	-0.212779	0.294954	-0.022395	-0.114211	0.020136	-0.720959	0.114467	0.506629	-0.42766	0.032137	-0.115131	-0.49963	0.327246	0.211675	-0.405265	0.146348	-0.135267
13410473	AT2G19720	5.19755	5.67403	5.78896	5.27624	5.67736	5.73876	5.14736	5.57894	5.7696	5.24733	6.12036	5.19627	6.10259	5.41485	5.68562	5.69738	5.25918	5.41158	5.43186	5.21162	5.14657	4.78296	5.30093	5.57902	0.905035	-0.259177	-0.103334	0.421147	-0.418188	-0.327179	-0.050188	-0.09509	-0.019357	-0.028905	0.442991	-0.542494	-0.670727	-0.203228	-0.539053	-0.914425	0.041754	0.167442	-0.620539	-0.108138	-0.519696	-0.88552	-0.401237	0.709936
13410708	AT2G20160	2.8205	3.0909	3.09865	2.83307	2.89227	3.12227	3.08261	3.58207	3.27801	2.93096	2.86424	2.91856	3.43163	3.2757	3.03584	3.28802	2.86542	3.76691	4.2405	3.36016	3.12138	2.95891	2.9862	3.35154	0.61113	0.184802	-0.062808	0.454955	-0.026847	0.644648	0.262114	0.49117	0.179359	0.097889	-0.02803	-0.203706	0.808866	0.08446	0.085543	-0.329113	0.120778	-0.415372	0.546752	-0.40671	-0.093816	-0.427002	0.148808	-0.211666
13411040	AT2G20720	6.48246	5.29514	6.16084	5.57732	5.48698	5.40934	7.00612	6.08741	6.05694	5.20356	5.43023	5.65926	7.73335	6.75827	6.60465	5.98225	6.73712	6.3729	8.60308	7.63802	6.61513	6.69701	6.77843	6.69857	1.25089	1.46313	0.443814	0.404929	1.25014	0.963561	0.52366	0.792272	-0.103896	-0.373758	-0.05674	0.249918	0.869732	0.879753	0.010474	0.714762	0.041307	0.325667	0.346072	0.087481	0.11437	1.08852	0.098047	0.075749
13411225	AT2G21130	7.39907	9.17488	9.03612	7.17932	5.37714	4.73516	7.89548	9.0146	9.24702	7.42807	4.91457	4.65877	4.96448	7.22084	7.73387	5.33485	4.02825	4.09296	5.6102	7.55484	7.68906	5.78218	4.28158	4.65306	-2.43459	-1.95404	-1.30225	-1.84447	-1.34889	-0.642199	0.496413	-0.160279	0.210896	0.248753	-0.462567	-0.076396	0.645717	0.334006	-0.044805	0.44733	0.253326	0.560096	0.149304	0.494285	-0.255701	0.198577	0.715893	0.636492
13411387	AT2G21450	3.95764	4.10559	3.90732	4.23368	4.03794	4.26245	3.62663	3.84348	3.82091	3.66194	3.72643	3.9017	4.39683	4.33025	4.53806	3.56863	4.19936	4.30887	3.52156	3.64948	3.75825	3.93599	4.46345	4.19537	0.439194	0.224661	0.630738	-0.665052	0.161423	0.046417	-0.33101	-0.262107	-0.086409	-0.571746	-0.311507	-0.360754	-0.875272	-0.680767	-0.779813	0.367361	0.264087	-0.113494	-0.544262	-0.41866	-0.693404	0.939107	0.575594	0.24726
13411838	AT5G67460	5.61858	5.45845	5.46443	5.90672	4.98021	6.05051	5.63731	6.23476	5.19861	5.36338	5.53636	5.47845	4.94381	5.29808	5.53411	5.46361	5.62866	4.80606	5.74677	5.41666	4.90824	4.94983	4.73445	5.19724	-0.674777	-0.160377	0.069677	-0.443107	0.648447	-1.24445	0.018729	0.776308	-0.265823	-0.54334	0.556143	-0.572063	0.802967	0.118582	-0.625865	-0.513778	-0.894206	0.391186	0.784238	-0.657726	-0.360042	0.029562	-1.45035	0.963249
13411880	AT2G23096	3.43914	3.34463	3.02847	3.27438	3.40605	3.01883	3.05302	3.14649	2.8946	3.11617	3.42175	3.27141	3.8205	3.53421	3.37024	3.74553	3.59729	3.51391	3.13471	3.40202	3.47055	3.79932	3.31896	3.38382	0.381352	0.189585	0.341773	0.471151	0.191234	0.49508	-0.386125	-0.198136	-0.133869	-0.15821	0.015697	0.252583	-0.685783	-0.132194	0.100308	0.053788	-0.278331	-0.130084	-0.299658	0.065942	0.234177	0.211998	-0.294028	-0.382667
13411916	AT2G23171	4.78708	5.32489	5.7757	4.58062	5.32876	5.92446	4.78558	5.75238	5.19108	4.99145	5.18856	5.64897	4.20598	4.882	5.08152	4.74026	4.45148	5.06005	4.95195	4.79839	3.68932	4.37516	4.89463	4.39052	-0.581099	-0.44289	-0.694176	0.159644	-0.87728	-0.864408	-0.001504	0.427487	-0.584619	0.410831	-0.140202	-0.275484	0.745969	-0.083606	-1.3922	-0.365104	0.443148	-0.669529	0.747473	-0.511093	-0.807585	-0.775935	0.58335	-0.394045
13412021	AT2G23550	3.98193	4.33242	4.24424	4.23565	4.17016	4.07392	4.14424	4.24424	4.28436	3.95092	4.4832	4.33378	5.02557	4.30163	4.41317	4.24953	4.56407	4.72015	4.24424	4.24424	4.67678	3.9948	4.1668	3.9755	1.04364	-0.030794	0.168931	0.013889	0.393908	0.646226	0.162312	-0.088185	0.040117	-0.284731	0.313036	0.259861	-0.781332	-0.057391	0.263613	-0.254735	-0.397276	-0.744654	-0.943644	0.030794	0.223496	0.029996	-0.710312	-1.00452
13412034	AT2G23570	3.61841	4.31466	3.87323	4.16289	3.72138	3.54258	3.8043	3.59923	3.60484	3.73621	3.52137	3.83785	3.99845	4.55053	3.93577	3.95616	3.41338	3.58907	4.87495	3.80916	3.36284	3.84691	3.80864	3.97397	0.380041	0.235872	0.062543	-0.206726	-0.307995	0.046486	0.185891	-0.715426	-0.268384	-0.426678	-0.200004	0.295272	0.876508	-0.741368	-0.572933	-0.109246	0.395261	0.3849	0.690617	-0.025942	-0.304549	0.317432	0.595265	0.089628
13412076	AT5G67460	5.61858	5.45845	5.46443	5.90672	4.98021	6.05051	5.63731	6.23476	5.19861	5.36338	5.53636	5.47845	4.94381	5.29808	5.53411	5.46361	5.62866	4.80606	5.74677	5.41666	4.90824	4.94983	4.73445	5.19724	-0.674777	-0.160377	0.069677	-0.443107	0.648447	-1.24445	0.018729	0.776308	-0.265823	-0.54334	0.556143	-0.572063	0.802967	0.118582	-0.625865	-0.513778	-0.894206	0.391186	0.784238	-0.657726	-0.360042	0.029562	-1.45035	0.963249
13412289	AT2G24230	5.69179	5.75974	5.76691	6.10509	5.77527	5.78291	5.65495	5.46779	6.11424	6.17037	5.94092	5.82265	5.69956	5.54501	5.85701	5.96904	5.91187	5.67703	4.90299	5.60739	5.96173	5.72027	5.50955	5.55498	0.007774	-0.214723	0.090102	-0.136052	0.136599	-0.10588	-0.036835	-0.291951	0.347332	0.065285	0.165648	0.03974	-0.796577	0.062376	0.10472	-0.248768	-0.402321	-0.122047	-0.759742	0.354327	-0.242612	-0.314053	-0.567969	-0.161787
13412437	AT2G24620	3.10781	3.29641	3.10134	3.26086	3.28107	3.11463	3.32291	3.09479	2.98501	3.23112	3.40121	3.21445	3.84539	3.12346	3.26051	3.52421	3.06792	3.49674	3.12532	3.35082	3.34928	3.37781	3.06591	3.07775	0.737578	-0.172957	0.159169	0.263355	-0.213146	0.382106	0.215096	-0.20162	-0.116325	-0.029741	0.12014	0.09982	-0.720068	0.227364	0.088771	-0.146405	-0.002015	-0.418987	-0.935164	0.428984	0.205096	-0.116664	-0.122155	-0.518807
13412564	AT2G24850	5.95355	5.58815	5.79136	6.27228	6.74879	6.94033	6.04627	5.9272	6.61818	8.38726	10.6113	11.0916	6.35613	5.7165	5.75076	7.8876	7.63336	9.62445	7.42993	6.09539	6.76727	9.57718	10.5119	10.5106	0.402585	0.128344	-0.040599	1.61532	0.884565	2.68412	0.092722	0.339047	0.826825	2.11498	3.86254	4.15127	1.0738	0.378894	1.01651	1.68958	2.87855	0.88615	0.981079	0.039847	0.189688	-0.425401	-0.983985	-3.26512
13412592	ATH-MIR83	4.75748	5.24136	4.41101	5.12313	4.67169	4.89694	4.62892	4.64168	4.49949	4.62434	4.21159	4.38583	4.69181	4.4885	4.54394	4.6815	4.31558	4.45524	4.68138	5.03358	4.46689	4.60328	4.18347	4.88065	-0.06567	-0.752854	0.13293	-0.441629	-0.356114	-0.441707	-0.128553	-0.599683	0.088482	-0.498793	-0.460107	-0.511115	-0.010429	0.545075	-0.077047	-0.078227	-0.132112	0.425415	0.118124	1.14476	-0.165529	0.420566	0.327995	0.93653
13412622	AT2G25090	4.16969	4.46449	4.26649	4.24676	5.19962	4.39021	4.71848	4.70937	4.91034	4.73233	5.10444	4.76691	5.17533	5.76565	5.65328	5.50931	6.37563	6.15739	5.91996	6.46108	6.2901	5.91065	6.74001	7.14899	1.00564	1.30116	1.38679	1.26256	1.17601	1.76718	0.548794	0.244886	0.643846	0.485579	-0.095186	0.376696	0.744624	0.695431	0.636815	0.401338	0.364382	0.991596	0.19583	0.450545	-0.007031	-0.084241	0.459568	0.6149
13412765	AT2G25312	2.57423	3.55864	3.08592	3.32745	2.65963	3.5511	3.09446	3.25294	2.62603	3.9273	3.04462	3.32702	3.51809	3.2668	2.72231	2.85669	3.63692	2.97413	2.46504	3.39629	2.8554	2.33213	3.17422	2.37549	0.943852	-0.291841	-0.363612	-0.470766	0.977289	-0.576971	0.520225	-0.305694	-0.459897	0.599846	0.384988	-0.224079	-1.05305	0.129491	0.133088	-0.524556	-0.462699	-0.598643	-1.57327	0.435185	0.592985	-1.1244	-0.847687	-0.374564
13412890	AT2G25680	7.19623	7.55292	7.51792	7.64785	7.22534	7.93793	7.17668	7.0655	7.10367	6.9647	7.10002	7.76435	7.13824	6.89008	7.06694	6.54715	7.67202	7.56526	7.86662	7.15831	7.02845	6.46477	7.30689	8.03726	-0.057992	-0.662841	-0.450982	-1.1007	0.446679	-0.372671	-0.01955	-0.487422	-0.414248	-0.683148	-0.12532	-0.17358	0.728379	0.268222	-0.038486	-0.082375	-0.365122	0.471998	0.747929	0.755644	0.375762	0.600773	-0.239802	0.645578
13412903	AT2G25700	2.66605	3.26222	2.95649	2.98337	2.80763	2.94564	2.97818	3.13623	2.93421	3.35046	2.94427	2.61025	2.47884	2.88678	3.57412	3.78583	2.96653	2.93707	3.39202	3.09807	3.3057	3.29727	3.016	2.82482	-0.187215	-0.375439	0.617627	0.802468	0.158896	-0.008569	0.312127	-0.125987	-0.022275	0.367092	0.136638	-0.335387	0.913187	0.21129	-0.268416	-0.488561	0.049472	-0.11225	0.60106	0.337277	-0.246141	-0.855653	-0.087166	0.223137
13413235	AT2G26420	4.11748	4.47496	4.21787	4.2868	4.51956	4.90503	4.28471	4.47069	4.21515	3.96448	4.56537	4.17974	3.96473	4.62014	4.25654	4.17639	4.82814	4.79507	4.60384	4.32404	4.49008	4.49981	4.52683	4.56785	-0.152754	0.14518	0.038672	-0.110412	0.30858	-0.109951	0.167232	-0.004267	-0.002722	-0.322317	0.045805	-0.725284	0.639114	-0.296098	0.23354	0.32342	-0.30131	-0.227226	0.471882	-0.291831	0.236262	0.645737	-0.347115	0.498058
13413277	AT2G26530	7.95357	7.52548	7.94551	7.50136	7.89518	6.77072	8.13055	7.89518	7.53545	8.1756	8.15453	8.04539	7.35188	6.96707	7.03922	6.8909	7.0202	7.249	7.99875	7.1751	7.1853	8.18897	7.85795	8.08707	-0.601692	-0.558418	-0.906297	-0.610461	-0.874986	0.478276	0.176976	0.369697	-0.410064	0.674237	0.259354	1.27467	0.646874	0.208037	0.14609	1.29807	0.837753	0.838074	0.469898	-0.16166	0.556154	0.623833	0.578399	-0.436597
13413726	AT2G27300	5.26414	5.08439	5.55208	5.64985	5.57702	5.37742	5.76623	5.73295	4.87787	5.81306	5.58017	5.34133	5.47235	5.35746	5.97036	5.80096	5.7062	6.23665	6.10202	5.89282	6.60823	5.98811	6.23665	5.98905	0.20821	0.273069	0.418289	0.151116	0.129185	0.859223	0.502092	0.648553	-0.674205	0.163212	0.003154	-0.036097	0.629672	0.535354	0.637863	0.187147	0.530447	-0.247593	0.12758	-0.113199	1.31207	0.023935	0.527293	-0.211496
13413731	AT2G27310	8.18552	7.88565	7.38793	7.10182	7.61139	7.57892	8.26874	8.40788	8.15743	8.01848	8.54528	9.01705	8.18401	7.77993	8.18401	7.99322	7.89563	7.9526	8.91911	8.44883	8.45683	8.85736	8.46658	8.37376	-0.001511	-0.105721	0.796081	0.8914	0.284244	0.373678	0.083218	0.522227	0.769502	0.916656	0.933898	1.43813	0.735096	0.668899	0.272824	0.864136	0.570952	0.421158	0.651878	0.146672	-0.496678	-0.05252	-0.362946	-1.01697
13413771	AT2G27390	8.45985	8.50792	8.28192	8.29747	7.90395	8.20185	8.80654	9.15592	9.20197	8.61598	8.31921	9.28477	9.34954	9.26341	9.31746	9.20197	8.49913	8.76052	10.0865	9.76937	10.0352	9.29971	8.65394	10.4445	0.889693	0.755486	1.03554	0.904505	0.595177	0.558675	0.346694	0.648	0.920053	0.318507	0.415263	1.08292	0.736966	0.50596	0.717722	0.097734	0.154815	1.68394	0.390272	-0.14204	-0.202331	-0.220773	-0.260448	0.601015
13413813	AT2G27500	8.40969	8.55232	8.3759	8.32265	8.20021	7.30658	8.59209	8.61591	8.42841	8.23179	7.75186	7.145	8.31583	8.64527	8.53511	8.41468	8.27499	7.29929	8.94892	8.63321	8.4109	8.5879	7.69902	7.57155	-0.093858	0.09295	0.159215	0.092027	0.074776	-0.007297	0.182403	0.063582	0.052508	-0.090868	-0.448353	-0.161583	0.633092	-0.012065	-0.124211	0.173215	-0.575969	0.272261	0.450689	-0.075647	-0.176719	0.264083	-0.127616	0.433844
13413838	AT1G79290	2.70765	3.21525	2.83437	2.52682	2.74903	2.78864	2.27282	3.65083	2.84041	2.64175	2.45515	2.61025	3.69838	2.69813	2.86017	3.07984	2.59056	2.76133	2.91773	2.84041	3.64373	3.09156	2.62901	3.26118	0.990728	-0.517123	0.025807	0.553017	-0.158474	-0.027313	-0.43484	0.435583	0.006039	0.114933	-0.29388	-0.17839	-0.780652	0.142277	0.783557	0.011723	0.038451	0.499845	-0.345812	-0.293306	0.777518	-0.10321	0.332331	0.678235
13413997	AT2G27970	8.58495	8.29654	8.68032	8.58149	8.93402	9.21004	8.3739	8.12451	8.24232	8.27279	8.76386	8.48001	7.10615	6.67016	6.9349	7.56717	7.75768	7.61945	6.36348	6.70824	7.4064	8.09359	7.36127	7.14515	-1.4788	-1.62638	-1.74542	-1.01432	-1.17634	-1.59059	-0.211043	-0.172034	-0.437997	-0.308698	-0.170164	-0.730032	-0.742668	0.038075	0.471498	0.526417	-0.396418	-0.474307	-0.531625	0.210109	0.909495	0.835115	-0.226254	0.255725
13414062	AT2G28110	5.65058	5.79808	5.43147	5.90981	6.246	6.15271	5.64357	6.11362	6.20765	5.25816	6.06801	7.15625	5.76147	6.55143	6.50081	6.1849	6.77298	6.49848	6.39637	6.78476	7.00563	6.26512	6.60065	7.28645	0.110884	0.753355	1.06934	0.27509	0.526978	0.345767	-0.007011	0.315542	0.77618	-0.651648	-0.177997	1.00354	0.634899	0.233325	0.504824	0.080218	-0.172335	0.787969	0.64191	-0.082217	-0.271356	0.731866	0.005662	-0.215569
13414127	AT2G28400	7.85353	7.94292	7.96586	6.49468	7.99782	7.88283	7.91637	7.37909	7.76344	6.3715	8.14893	8.62697	8.19367	8.56237	8.20305	7.19708	7.95899	8.04008	8.888	8.7721	8.03193	7.65162	8.05523	8.5815	0.340141	0.619452	0.237187	0.702403	-0.038836	0.157254	0.062842	-0.563829	-0.20242	-0.123177	0.151111	0.744145	0.694339	0.209726	-0.171119	0.454538	0.096244	0.541418	0.631497	0.773555	0.031301	0.577715	-0.054867	-0.202727
13414189	AT2G28490	4.03192	5.13067	4.58322	4.23169	4.43813	4.91376	4.09707	4.67675	3.72249	4.25443	4.09256	4.54477	5.02074	4.53187	5.09751	4.24787	4.28235	4.37086	3.94426	4.02342	3.9076	4.35168	4.47575	4.34866	0.988819	-0.598797	0.514289	0.016179	-0.155775	-0.542898	0.065151	-0.453922	-0.860731	0.022734	-0.345562	-0.36899	-1.07648	-0.508448	-1.18991	0.103809	0.193397	-0.022195	-1.14163	-0.054526	-0.329179	0.081075	0.538959	0.346795
13414217	AT2G28560	5.18066	5.27128	5.57621	6.09386	5.15932	6.03	5.01845	4.61444	4.25329	5.90705	5.42862	5.3947	5.72942	4.79892	5.05613	6.8821	6.10305	5.86383	5.03326	5.16615	4.99607	6.60718	5.77507	5.67771	0.548758	-0.472362	-0.520077	0.788235	0.94373	-0.166173	-0.162206	-0.65684	-1.32292	-0.186807	0.269304	-0.635307	-0.696161	0.367235	-0.060064	-0.274913	-0.327981	-0.186123	-0.533955	1.02408	1.26285	-0.088106	-0.597285	0.449184
13414456	AT2G29120	9.92203	9.49797	9.45762	9.58619	9.72825	9.97172	10.0687	9.64182	9.93705	9.9776	10.1802	10.5831	7.27473	7.20514	7.44298	7.68671	7.48986	8.25154	8.10778	7.77924	7.86757	7.79311	8.26689	8.73164	-2.64729	-2.29283	-2.01464	-1.89948	-2.23839	-1.72018	0.146684	0.143848	0.479428	0.391416	0.451944	0.611345	0.833047	0.574101	0.424588	0.106401	0.777034	0.480098	0.686363	0.430253	-0.05484	-0.285015	0.32509	-0.131247
13414526	AT2G29420	7.57857	7.26879	8.33462	8.32524	8.58377	9.06054	7.61316	7.62599	8.39816	8.68099	8.64401	8.43012	7.5556	7.2603	7.86468	7.89657	8.37884	8.19599	8.31354	7.93871	7.94	8.76208	8.08078	8.26483	-0.022973	-0.008492	-0.469946	-0.428673	-0.20493	-0.864555	0.034588	0.357191	0.063543	0.355751	0.060245	-0.630423	0.757941	0.678407	0.075321	0.865512	-0.298058	0.068841	0.723353	0.321216	0.011778	0.509761	-0.358303	0.699264
13414535	AT2G29450	9.57313	10.1604	10.5364	9.00177	10.5282	10.6068	9.92318	9.84071	10.7428	9.45906	10.6125	10.8174	9.52554	10.0556	10.2939	9.08491	10.4565	10.5358	10.2466	10.2091	10.2139	9.52258	10.6344	10.4939	-0.04759	-0.10483	-0.24255	0.083143	-0.07172	-0.07099	0.350053	-0.319731	0.20634	0.457295	0.08425	0.21061	0.721033	0.15345	-0.07999	0.437674	0.17784	-0.04189	0.37098	0.473181	-0.28633	-0.019621	0.09359	-0.2525
13414546	AT2G29470	3.8844	3.99482	3.97062	3.96657	4.03116	4.01374	3.71889	4.04164	4.39211	4.11242	4.40433	6.74791	4.88294	4.78232	4.59758	4.85273	4.4508	4.8927	6.35583	6.70013	6.02595	5.66751	5.6044	8.0322	0.998546	0.787499	0.626958	0.886164	0.419643	0.878961	-0.165509	0.046823	0.421483	0.145854	0.373174	2.73417	1.47288	1.91781	1.42837	0.814781	1.1536	3.1395	1.63839	1.87099	1.00689	0.668927	0.780427	0.405329
13414633	AT2G29720	8.19726	7.01611	7.23246	7.71908	6.6936	6.48947	8.20955	7.64904	7.93636	8.17236	6.89498	7.69529	9.21842	7.88464	8.35174	9.23268	7.47662	8.17314	9.98738	8.78603	8.73035	9.70465	8.11638	8.66787	1.02116	0.86853	1.11928	1.5136	0.783019	1.68367	0.012287	0.632927	0.7039	0.453279	0.201377	1.20582	0.768962	0.901389	0.378616	0.471979	0.639761	0.494735	0.756675	0.268462	-0.325284	0.0187	0.438384	-0.71109
13414644	AT2G29780	4.95888	5.74817	6.28243	5.67084	5.79488	6.24186	4.68195	6.77186	5.37657	6.02557	5.05518	5.76247	5.73902	5.24293	5.53282	5.243	4.80214	4.87337	5.00307	4.85882	4.36798	4.90472	5.85318	4.83976	0.78014	-0.505243	-0.749616	-0.427843	-0.992735	-1.36849	-0.276932	1.02368	-0.905857	0.354724	-0.739699	-0.479382	-0.73595	-0.384113	-1.16484	-0.338278	1.05104	-0.033606	-0.459018	-1.4078	-0.258982	-0.693002	1.79074	0.445776
13414660	AT2G29810	4.22086	5.35313	5.62621	4.48705	5.36226	5.42272	4.55712	5.89351	4.53791	5.06575	4.72315	5.82805	5.0295	5.25059	5.36427	4.96698	5.5436	4.48781	4.3545	4.82593	3.74328	4.41947	4.76996	4.08128	0.808643	-0.102547	-0.261933	0.479926	0.181339	-0.934917	0.336262	0.540376	-1.0883	0.5787	-0.639114	0.40533	-0.674997	-0.424658	-1.62099	-0.547508	-0.773642	-0.406525	-1.01126	-0.965034	-0.532696	-1.12621	-0.134528	-0.811855
13414672	AT2G29910	7.08233	7.0651	6.62154	7.6921	7.58674	7.34011	7.26856	6.59363	7.42796	7.50039	7.5962	7.51583	8.50599	8.27046	8.38376	8.91614	8.84948	8.48807	7.8242	8.14616	8.22304	8.93758	8.71236	8.42072	1.42366	1.20536	1.76222	1.22404	1.26274	1.14795	0.186229	-0.47147	0.806424	-0.191705	0.009467	0.175714	-0.681787	-0.1243	-0.160716	0.021441	-0.137112	-0.067347	-0.868016	0.34717	-0.96714	0.213146	-0.146579	-0.243061
13414708	AT2G29990	8.62115	8.31174	7.54716	7.78558	7.98801	8.32529	8.79254	8.67304	8.47782	7.85916	8.80509	9.04951	8.9258	8.44862	8.61582	8.54361	8.4395	8.88172	9.59267	9.20075	8.8585	8.92638	9.00267	9.15463	0.304645	0.136879	1.06865	0.758029	0.451488	0.556429	0.17139	0.361296	0.93066	0.073577	0.817079	0.724218	0.666873	0.752124	0.242681	0.382768	0.563173	0.272908	0.495483	0.390828	-0.687979	0.309191	-0.253906	-0.45131
13414917	AT2G30432	5.86097	5.23043	4.77219	5.04579	4.78333	5.4316	5.4721	4.5681	4.33449	4.54726	4.19788	4.24229	6.03534	5.72923	5.03201	5.00561	5.68921	5.21103	5.08088	5.78107	4.80195	4.9683	5.03707	4.92585	0.174366	0.498803	0.259813	-0.040173	0.90588	-0.220565	-0.38887	-0.662326	-0.437706	-0.498528	-0.585444	-1.18931	-0.954459	0.051844	-0.230056	-0.037309	-0.652135	-0.285187	-0.565589	0.71417	0.20765	0.461219	-0.066691	0.904121
13415120	AT2G30770	6.1217	5.91147	6.43037	7.81929	8.0192	5.28921	5.93309	5.65344	7.0782	8.0192	8.1693	8.9093	8.27726	8.49074	7.70072	8.5138	8.21691	9.33354	9.56143	9.24186	8.48333	8.66059	8.93571	10.1288	2.15556	2.57927	1.27035	0.694513	0.197703	4.04433	-0.188618	-0.25803	0.647825	0.199916	0.150094	3.62008	1.28417	0.751127	0.782609	0.146791	0.718805	0.795272	1.47279	1.00916	0.134784	-0.053125	0.568711	-2.82481
13415420	AT2G31420	3.10252	2.96841	3.2418	3.42431	3.49878	3.19088	3.319	3.36782	3.69007	3.38388	3.21313	3.5283	3.75702	3.81913	3.61659	3.61414	4.08174	3.3549	4.71338	4.55273	3.63398	3.43311	3.56464	3.89091	0.654505	0.850717	0.374789	0.189825	0.58296	0.164021	0.216477	0.399403	0.448272	-0.040436	-0.285643	0.337425	0.956354	0.7336	0.01739	-0.181027	-0.517094	0.536009	0.739877	0.334197	-0.430882	-0.140591	-0.231451	0.198584
13415501	AT2G31590	4.36372	5.56126	5.60393	4.99582	4.50448	4.63356	4.75846	4.40261	4.84438	5.64586	5.25744	4.47627	5.08816	5.50579	6.18535	5.16162	6.12402	5.2202	6.12294	6.47499	6.166	5.87432	5.21633	5.5831	0.724441	-0.05547	0.581423	0.165796	1.61953	0.586636	0.394738	-1.15865	-0.759547	0.650042	0.752957	-0.15729	1.03478	0.969194	-0.019357	0.712705	-0.90769	0.362902	0.640039	2.12784	0.74019	0.062663	-1.66065	0.520192
13415505	AT2G31600	6.88075	7.0186	7.07648	6.95414	6.63016	6.72915	6.67699	7.05272	6.9536	7.0063	7.12511	6.59063	6.49068	7.05837	7.44041	7.12321	7.39524	6.82722	7.3332	7.38274	7.49519	7.10174	7.15887	7.05076	-0.390065	0.039775	0.363935	0.169073	0.765072	0.098065	-0.203758	0.034121	-0.122875	0.052167	0.494949	-0.138521	0.842519	0.324365	0.054782	-0.021469	-0.236362	0.223545	1.04628	0.290244	0.177657	-0.073636	-0.731311	0.362066
13415546	AT2G31690	3.86335	4.749	5.25389	4.00565	4.23592	5.09305	3.95591	4.86238	4.20744	4.8369	4.23592	4.95923	4.14841	4.37472	4.29327	4.11164	4.23592	4.23592	4.92947	4.22202	3.84532	3.90689	4.65707	3.65565	0.285068	-0.374288	-0.960615	0.105996	0	-0.857133	0.092567	0.113377	-1.04645	0.831258	0	-0.133828	0.781054	-0.152693	-0.447946	-0.204751	0.421152	-0.580271	0.688487	-0.26607	0.598503	-1.03601	0.421152	-0.446443
13415750	AT2G32020	4.37241	3.85082	4.01979	4.07859	4.08886	3.92574	4.50168	3.99814	4.33806	4.19802	4.05483	3.77604	4.59628	4.11225	4.13476	4.08903	4.2106	4.16312	5.32918	5.02561	4.09838	4.48607	3.99063	4.01503	0.223871	0.261429	0.114974	0.010438	0.121741	0.237384	0.129277	0.14732	0.318273	0.119428	-0.034028	-0.149701	0.732903	0.913363	-0.036384	0.397046	-0.219963	-0.14809	0.603626	0.766043	-0.354657	0.277618	-0.185935	0.001611
13415753	AT2G32030	4.7831	4.09579	3.30175	4.6591	3.66853	4.21032	5.29013	4.36026	4.16923	4.81296	3.88399	4.27929	5.96956	5.29174	5.11326	5.29014	5.1334	5.00496	6.7162	5.89358	5.59979	6.1316	5.12655	5.70932	1.18646	1.19595	1.81151	0.631039	1.46486	0.794644	0.507021	0.264468	0.86748	0.153861	0.215458	0.068972	0.746637	0.601841	0.486529	0.841463	-0.006853	0.70436	0.239616	0.337373	-0.380951	0.687602	-0.222311	0.635388
13415784	AT2G32130	3.70774	3.55483	3.36608	2.93086	4.1894	3.57903	4.06508	3.35305	3.14943	3.0384	3.94348	4.68476	6.01222	5.24689	4.73605	5.38304	6.18813	7.26409	6.86423	5.87393	5.10576	6.27566	6.79415	7.27915	2.30448	1.69207	1.36997	2.45218	1.99873	3.68507	0.357335	-0.20178	-0.216646	0.107547	-0.245928	1.10573	0.852005	0.627038	0.369711	0.89262	0.606021	0.015052	0.49467	0.828818	0.586357	0.785073	0.851949	-1.09068
13415903	AT2G32510	3.68526	3.81392	4.0957	4.11492	3.85816	4.6361	3.82394	4.0663	4.31702	4.71301	5.77204	6.3059	3.42335	4.58089	4.23982	4.2024	3.72175	4.51019	4.21118	3.28734	4.12174	4.23587	4.59335	5.19454	-0.261909	0.766965	0.144117	0.087485	-0.136406	-0.125911	0.138677	0.25238	0.221319	0.598095	1.91388	1.66979	0.787831	-1.29355	-0.118082	0.033467	0.871596	0.684349	0.649154	-1.54593	-0.339401	-0.564628	-1.04229	-0.985446
13415956	AT2G32645	4.3951	4.62779	5.08174	4.62322	4.41855	5.02276	4.78347	4.71238	4.54945	4.50071	4.11413	5.00095	6.08173	5.34306	5.46897	5.90479	5.124	5.3444	5.25197	4.89333	4.9509	5.09598	5.2463	4.68303	1.68662	0.715267	0.387233	1.28157	0.705451	0.321638	0.388372	0.084588	-0.532292	-0.122506	-0.304425	-0.021813	-0.829754	-0.449736	-0.518072	-0.80881	0.122299	-0.661366	-1.21813	-0.534324	0.01422	-0.686304	0.426724	-0.639553
13416197	AT2G33130	4.14001	4.78423	4.84281	5.06772	4.94767	4.53025	4.7221	4.7126	4.19942	5.15488	4.4218	4.58164	5.47565	5.37814	5.69437	6.49518	5.61182	5.07103	6.35424	5.77061	6.73619	6.12415	5.30769	5.05303	1.33564	0.593918	0.851553	1.42746	0.664152	0.540777	0.582091	-0.071631	-0.64339	0.08716	-0.525878	0.051387	0.878583	0.392463	1.04182	-0.371033	-0.304134	-0.017997	0.296492	0.464094	1.68521	-0.458193	0.221744	-0.069384
13416565	AT2G33870	2.73105	3.28373	3.37709	2.7243	2.72972	2.99775	2.7397	3.40972	3.09925	3.03107	2.81861	3.21306	2.90042	4.18215	2.7493	3.27326	3.36653	3.43103	4.06305	3.38243	2.96544	3.58398	3.30874	3.3689	0.169373	0.89842	-0.627792	0.548956	0.636811	0.433283	0.008649	0.125991	-0.277832	0.306765	0.088893	0.215309	1.16263	-0.799725	0.216145	0.310721	-0.057791	-0.062134	1.15398	-0.925716	0.493977	0.003956	-0.146684	-0.277443
13416568	AT2G33880	4.87858	5.90083	5.7117	5.73959	5.29601	6.04548	4.74305	6.55856	5.4233	4.97016	5.26128	6.30454	6.13666	6.23875	5.78604	5.47784	5.97039	5.72181	5.45979	5.20444	4.96274	5.08813	5.4233	5.08259	1.25808	0.337923	0.07434	-0.261743	0.674374	-0.323672	-0.135535	0.657731	-0.288398	-0.76943	-0.034735	0.259059	-0.676865	-1.03431	-0.823304	-0.389709	-0.547085	-0.63922	-0.54133	-1.69204	-0.534906	0.379721	-0.51235	-0.898279
13416607	AT2G34030	3.75965	3.63305	3.23596	3.44718	3.72385	3.69905	4.32439	3.55676	3.78784	3.84898	3.28915	4.23262	4.3319	3.89013	3.87336	4.16411	3.4813	4.01475	3.37027	3.9194	3.6212	4.26373	3.91973	4.02484	0.57225	0.257085	0.637403	0.716935	-0.242545	0.315694	0.564739	-0.076282	0.551883	0.40181	-0.434699	0.533563	-0.961627	0.029268	-0.252166	0.099619	0.438428	0.010094	-1.52637	0.10555	-0.804049	-0.302191	0.873127	-0.523469
13416650	AT2G34080	4.79992	4.3888	5.36072	4.80145	5.02983	4.9585	4.62083	4.9351	5.5171	4.48866	5.55232	6.07236	5.20667	4.93011	5.38595	5.3416	5.15616	5.64864	5.92366	6.12516	6.43609	5.74418	5.84879	7.18242	0.406741	0.541309	0.025229	0.54015	0.126326	0.690142	-0.179093	0.546301	0.156372	-0.312796	0.522496	1.11386	0.716991	1.19506	1.05014	0.402574	0.692639	1.53378	0.896084	0.648756	0.893764	0.71537	0.170143	0.419917
13416706	AT2G34224	4.04516	4.94536	4.62465	3.95819	4.08905	4.92508	4.1208	3.92298	4.15811	4.07247	4.17683	4.25753	4.7646	4.91551	4.14928	3.70118	4.05827	4.13746	3.49821	4.11729	4.01306	4.09144	4.37446	3.82191	0.71944	-0.029852	-0.475371	-0.257007	-0.030783	-0.787618	0.075643	-1.02238	-0.466542	0.114282	0.087776	-0.667545	-1.26639	-0.79822	-0.136218	0.390263	0.316194	-0.315549	-1.34204	0.224163	0.330324	0.275981	0.228418	0.351996
13416794	AT2G34510	9.30359	8.82406	9.09522	9.67101	8.86531	8.75678	9.03295	8.49509	8.69058	9.60279	8.35677	7.83676	8.92174	8.7281	8.81667	9.21338	8.63513	8.80683	8.24981	8.18523	8.48694	9.06748	8.29666	8.55826	-0.381845	-0.095957	-0.278556	-0.457637	-0.230176	0.050045	-0.270637	-0.32897	-0.404644	-0.068225	-0.508536	-0.920018	-0.671929	-0.542871	-0.329731	-0.145898	-0.338472	-0.248568	-0.401292	-0.213901	0.074913	-0.077673	0.170064	0.67145
13417165	AT2G35290	6.49834	5.44646	5.22209	5.70153	4.61066	4.29951	6.20653	5.45827	4.57472	6.14839	4.3448	4.57792	5.83027	5.45744	4.68849	4.47298	3.4263	4.08258	4.54446	5.40373	4.70497	4.73057	3.60892	3.86204	-0.668077	0.010986	-0.533599	-1.22854	-1.18436	-0.216936	-0.291814	0.011808	-0.647366	0.44687	-0.265864	0.278411	-1.28581	-0.053711	0.01648	0.257588	0.182622	-0.220542	-0.993992	-0.065519	0.663846	-0.189282	0.448486	-0.498953
13417201	AT2G35384	3.17244	2.71989	2.99094	2.28253	2.54605	2.70501	2.86644	2.83437	3.33611	3.64272	2.35551	2.79135	2.04126	2.71989	3.67518	2.44278	2.7987	3.10846	2.81402	3.12754	2.34394	3.40743	2.53025	2.92768	-1.13118	0	0.684246	0.160258	0.252651	0.403448	-0.306002	0.114476	0.34517	1.3602	-0.190546	0.086343	0.772759	0.407654	-1.33125	0.964651	-0.268455	-0.180783	1.07876	0.293178	-1.67642	-0.395545	-0.077909	-0.267126
13417689	AT2G36590	4.84794	4.9927	4.44531	5.36869	5.65344	7.19898	4.68553	4.66997	4.71024	5.57364	7.12225	8.34709	5.17784	3.69866	4.63579	4.56399	4.68915	5.622	4.39213	4.77721	4.14905	5.04699	5.0548	6.50487	0.329907	-1.29404	0.190486	-0.804699	-0.964292	-1.57698	-0.162412	-0.322731	0.264939	0.204951	1.46881	1.1481	-0.785711	1.07855	-0.48674	0.483003	0.365649	0.882869	-0.623299	1.40129	-0.751679	0.278052	-1.10316	-0.265234
13417790	AT2G36750	4.26062	4.33291	4.3357	3.89398	4.13363	5.02926	3.85518	4.361	4.28021	3.93125	4.72148	4.7592	4.83842	5.16409	4.81001	4.46055	4.89009	5.93086	5.48108	4.99938	5.15985	4.89111	4.77666	5.36897	0.5778	0.83118	0.47431	0.566575	0.756451	0.901607	-0.405448	0.028088	-0.055494	0.037276	0.587844	-0.270056	0.642659	-0.164709	0.349837	0.430556	-0.113423	-0.561888	1.04811	-0.192797	0.405331	0.39328	-0.701267	-0.291832
13418265	AT2G37670	5.14292	5.11181	5.85009	5.09648	4.77976	5.10815	4.95256	4.80055	4.50158	3.73294	5.18979	4.69792	5.94555	5.06681	5.21614	4.31314	5.01372	5.03388	4.56897	5.30626	5.27969	4.00652	5.81172	5.29639	0.80263	-0.045002	-0.633956	-0.783342	0.233961	-0.074268	-0.190352	-0.311254	-1.34851	-1.36354	0.410027	-0.41022	-1.37658	0.239458	0.063555	-0.306619	0.798003	0.262511	-1.18622	0.550712	1.41207	1.05692	0.387976	0.672731
13418431	AT2G38100	3.60396	4.39701	3.79844	3.66889	3.87548	3.81925	3.8855	3.41368	3.97931	3.43708	3.87894	4.32692	4.78632	3.94789	3.9353	3.81106	3.84244	3.80656	3.9305	4.084	4.05443	3.319	3.99987	3.88564	1.18237	-0.449122	0.136865	0.142172	-0.033042	-0.012689	0.281541	-0.983328	0.180873	-0.231807	0.003452	0.507664	-0.855824	0.136112	0.119129	-0.492067	0.15743	0.079073	-1.13736	1.11944	-0.061744	-0.26026	0.153978	-0.428591
13418736	AT2G38860	8.6442	8.27746	7.93883	7.94567	8.16567	8.37021	9.09474	9.21593	9.06258	8.40957	8.84161	9.28323	9.36777	9.41676	9.3844	8.69365	8.82171	9.09359	10.3747	10.3266	9.8041	9.40678	9.37813	9.77221	0.723576	1.1393	1.44557	0.747979	0.656043	0.723381	0.450542	0.938473	1.12375	0.463898	0.675941	0.913019	1.0069	0.909851	0.419697	0.713133	0.55642	0.678619	0.556356	-0.028622	-0.704052	0.249235	-0.119521	-0.2344
13418936	AT2G39300	5.03712	5.17337	5.40953	5.73213	5.35919	5.27618	4.9202	5.24645	5.30977	5.63204	5.0362	5.16308	5.62755	5.25377	5.51979	5.93143	5.35414	5.59353	4.62454	5.17863	5.57208	5.49697	5.52192	5.30181	0.590429	0.080397	0.110263	0.199304	-0.005053	0.317354	-0.116914	0.073082	-0.099757	-0.100094	-0.32299	-0.113102	-1.00301	-0.075139	0.052294	-0.434463	0.167785	-0.291726	-0.886092	-0.148221	0.152051	-0.334369	0.490775	-0.178624
13419051	AT2G39518	7.19626	6.35561	5.58063	4.76365	5.51788	4.02863	7.67351	6.81486	7.69925	5.51207	5.76732	5.42069	7.28282	6.14205	4.70259	4.87548	4.93241	4.61652	8.02049	6.91429	6.90763	5.65552	4.93462	5.33791	0.086563	-0.213559	-0.878046	0.111822	-0.585471	0.587884	0.477255	0.459246	2.11862	0.748414	0.249438	1.39206	0.737671	0.772235	2.20504	0.780047	0.002214	0.721398	0.260416	0.312989	0.086416	0.031633	-0.247224	-0.670663
13419281	AT2G40080	4.80815	8.451	9.804	7.34229	3.92268	4.14091	5.00515	8.51096	9.64705	7.57834	3.83964	4.03879	4.46563	7.96331	9.78787	7.35798	4.13527	4.67498	5.57734	8.74232	9.57691	7.81665	3.79371	4.85341	-0.342515	-0.487693	-0.016128	0.015693	0.212591	0.534072	0.197006	0.05996	-0.156947	0.236057	-0.083042	-0.102123	1.11171	0.779017	-0.21096	0.458671	-0.341557	0.17843	0.914702	0.719057	-0.054013	0.222614	-0.258515	0.280553
13419643	AT2G40925	5.75741	5.3332	5.07658	5.24244	4.42134	6.06039	5.50705	5.92494	4.89996	5.06676	4.36953	4.98494	4.63952	5.12771	5.46723	5.48319	4.61846	5.77674	5.81192	5.13613	5.2238	5.87013	5.24374	5.3829	-1.11788	-0.205492	0.390655	0.240754	0.197118	-0.283648	-0.250354	0.591742	-0.176613	-0.175672	-0.051815	-1.07544	1.1724	0.008423	-0.243426	0.386945	0.625275	-0.393838	1.42275	-0.583319	-0.066813	0.562617	0.67709	0.681606
13419691	AT2G41050	5.65305	5.44172	5.07852	5.61568	6.37245	5.5583	5.96361	5.07493	5.16239	5.45818	5.71035	5.30377	4.67637	5.97297	5.52428	5.48674	6.01304	5.6168	5.38381	5.43326	5.68376	4.98504	5.68609	5.20511	-0.97668	0.531255	0.445761	-0.12894	-0.359409	0.058499	0.31056	-0.366787	0.083872	-0.1575	-0.662099	-0.25453	0.70744	-0.539711	0.15948	-0.501697	-0.326945	-0.411682	0.39688	-0.172924	0.075608	-0.344197	0.335154	-0.157152
13419754	AT2G41240	4.36387	5.27905	6.07878	5.13314	8.19933	4.60411	4.01585	4.11569	4.84596	4.38239	7.36849	4.30412	4.30412	4.56276	4.67962	4.50132	4.61207	4.6606	4.94586	3.78615	5.08948	3.54127	4.05607	5.33202	-0.059754	-0.716292	-1.39916	-0.631811	-3.58726	0.056493	-0.348021	-1.16336	-1.23282	-0.750743	-0.830842	-0.299988	0.641742	-0.776606	0.409867	-0.960055	-0.555999	0.671416	0.989763	0.386756	1.64269	-0.209312	0.274843	0.971404
13419791	AT2G41415	3.84738	3.52794	4.08056	3.72838	3.4701	4.0583	3.46158	4.30371	3.54646	3.57405	3.22923	4.03004	3.67328	3.9176	3.42976	4.15965	3.62817	3.69001	4.31845	3.20093	3.52256	3.34474	3.8739	3.86142	-0.174098	0.389654	-0.650801	0.431268	0.158064	-0.368291	-0.3858	0.775762	-0.534104	-0.154334	-0.240867	-0.028263	0.64517	-0.716668	0.092804	-0.814913	0.245739	0.171407	1.03097	-1.49243	0.626908	-0.660579	0.486606	0.19967
13420874	AT2G43580	3.88069	3.9412	4.51722	3.52771	4.36079	6.33354	4.24675	5.03055	4.77306	3.9142	5.31544	6.94799	4.51008	5.20467	4.21342	5.06806	3.91715	5.17105	5.40531	6.63466	5.69793	4.42054	4.76778	5.20359	0.629391	1.26347	-0.3038	1.54035	-0.443638	-1.1625	0.366062	1.08936	0.255845	0.386489	0.954654	0.614443	0.895231	1.42999	1.48451	-0.647523	0.85063	0.032545	0.529169	0.34063	1.22866	-1.03401	-0.104024	-0.581898
13421209	AT2G44320	5.86947	5.7021	6.58066	6.0518	6.19843	6.26098	5.5305	6.61081	5.52904	5.68862	5.42654	6.41352	5.41899	6.02157	6.12732	5.69163	5.72812	5.74481	6.29064	5.3744	5.65155	5.07834	6.22745	5.83172	-0.450479	0.319474	-0.453338	-0.360175	-0.470307	-0.516167	-0.338966	0.908708	-1.05162	-0.363178	-0.771893	0.152546	0.871649	-0.647175	-0.475768	-0.61329	0.499322	0.086914	1.21061	-1.55588	0.575851	-0.250112	1.27121	-0.065632
13421225	AT2G44390	5.17194	5.78894	6.34521	5.7794	5.78352	6.10513	5.06198	6.40605	5.77612	5.70068	5.73525	6.13585	5.3158	5.49068	5.86803	5.22879	6.58144	6.43772	6.0327	5.16019	4.94821	5.38374	7.17772	6.84995	0.143861	-0.298261	-0.477182	-0.550604	0.797913	0.33259	-0.109955	0.617107	-0.569086	-0.078722	-0.048272	0.03072	0.716901	-0.330497	-0.919813	0.154944	0.596288	0.412231	0.826856	-0.947604	-0.350727	0.233666	0.64456	0.381511
13421246	AT2G44550	4.0837	4.47634	4.32797	3.96481	4.16543	4.38472	4.29026	4.01945	4.11129	4.65748	3.9813	3.93515	4.8839	4.60817	4.44284	4.55369	4.31291	4.89164	4.09825	4.35623	4.66326	4.48822	4.56187	4.36387	0.800193	0.131831	0.114877	0.588878	0.147485	0.506917	0.206554	-0.456882	-0.216678	0.692665	-0.184131	-0.449574	-0.785652	-0.251938	0.220418	-0.065469	0.248953	-0.527773	-0.992206	0.204944	0.437096	-0.758134	0.433084	-0.078199
13421521	AT2G45220	6.05506	6.26752	5.50046	6.57301	6.81346	5.7307	6.43082	6.6369	7.62978	7.03977	7.77883	8.89624	7.5136	7.14357	7.03803	7.66322	7.74604	7.60132	8.50014	8.17895	8.23887	8.48153	8.29176	9.50493	1.45854	0.876055	1.53757	1.09021	0.932579	1.87061	0.375759	0.369387	2.12932	0.466756	0.965369	3.16554	0.986534	1.03538	1.20084	0.818314	0.545727	1.90361	0.610775	0.665994	-0.928483	0.351558	-0.419642	-1.26193
13421526	AT2G45245	4.18435	4.12223	4.36144	4.54945	4.67984	4.6056	4.16864	4.30193	4.45163	4.5765	4.80644	4.4244	3.3687	4.15927	4.16	4.20675	4.24636	4.34901	4.01877	4.32512	4.73712	3.96454	4.10462	4.38294	-0.815649	0.037041	-0.201442	-0.342696	-0.433483	-0.256587	-0.015701	0.179706	0.090195	0.027052	0.126605	-0.181202	0.65007	0.165849	0.577118	-0.242213	-0.141738	0.033928	0.665771	-0.013857	0.486923	-0.269265	-0.268343	0.21513
13421761	AT2G45760	2.37948	2.13436	2.27698	2.30318	2.19158	2.31788	2.25232	2.15909	2.27698	2.26287	3.7573	4.82533	4.71843	3.72396	2.83022	4.08423	3.80956	4.84188	5.60198	4.44577	2.94513	4.62029	4.65133	5.80937	2.33894	1.5896	0.55324	1.78105	1.61797	2.524	-0.127166	0.024727	7e-06	-0.040312	1.56571	2.50744	0.883547	0.721809	0.114916	0.536059	0.841774	0.96749	1.01071	0.697082	0.114909	0.576371	-0.723937	-1.53995
13422150	AT2G46750	3.25045	3.17771	3.50031	4.13722	4.17566	3.65594	3.67532	4.34389	3.23439	3.42566	3.27076	3.23663	3.71741	4.64169	4.32989	3.63952	3.72282	3.97391	4.48474	3.96947	4.38238	4.06615	3.6558	4.0306	0.466955	1.46398	0.829583	-0.497697	-0.452846	0.317967	0.424865	1.16618	-0.265918	-0.711566	-0.904898	-0.419311	0.767329	-0.672221	0.052495	0.426621	-0.067018	0.056693	0.342464	-1.8384	0.318413	1.13819	0.83788	0.476004
13422167	AT2G46840	4.06321	4.67502	4.46826	4.88318	4.15267	4.82102	4.2319	4.82623	4.66021	4.1802	4.08037	3.77462	3.68805	4.658	4.25296	5.39826	4.292	4.5957	4.50144	4.36462	4.01198	4.36806	4.60574	4.66089	-0.375157	-0.01702	-0.215306	0.515076	0.139328	-0.225321	0.168694	0.151211	0.191953	-0.702983	-0.072297	-1.0464	0.813391	-0.293376	-0.240971	-1.03019	0.313743	0.065196	0.644697	-0.444587	-0.432924	-0.32721	0.38604	1.11159
13422213	AT2G46940	4.16739	4.10202	4.28853	4.16615	3.70894	4.73168	4.12923	4.77225	4.26798	4.82334	4.36512	4.72993	4.53547	4.6381	4.7842	4.86273	5.101	5.19863	5.20748	4.76628	4.78039	4.55971	5.41521	4.86724	0.368079	0.53608	0.495671	0.69659	1.39206	0.466949	-0.038156	0.670229	-0.020554	0.657194	0.656175	-0.001754	0.672014	0.128179	-0.003815	-0.303021	0.314209	-0.331388	0.71017	-0.54205	0.016739	-0.960215	-0.341966	-0.329634
13422258	AT2G47000	5.86301	5.34065	5.32649	5.59304	4.97609	5.328	6.2673	5.68257	5.38679	5.77016	5.57884	6.24701	6.78038	5.74385	6.04782	6.09903	5.53239	5.53697	7.5948	6.54817	6.20691	6.54439	5.52869	5.99547	0.917376	0.403199	0.721327	0.50599	0.556295	0.208972	0.404296	0.341923	0.0603	0.177125	0.602747	0.919017	0.814417	0.804324	0.159091	0.445362	-0.003699	0.458497	0.410121	0.462401	0.098791	0.268237	-0.606446	-0.46052
13422424	AT2G47430	4.0969	4.28776	3.84301	3.90664	3.77373	4.03138	3.8681	4.92548	3.94922	3.98162	3.98128	4.21244	4.77844	4.34591	4.75946	3.98762	4.26443	4.01289	3.87311	3.97463	4.49629	3.66725	4.02691	4.23178	0.681546	0.058148	0.916444	0.080976	0.490697	-0.018496	-0.228793	0.637718	0.106202	0.074982	0.207546	0.181058	-0.905334	-0.371273	-0.263169	-0.320367	-0.237519	0.218891	-0.676541	-1.00899	-0.369371	-0.395349	-0.445065	0.037833
13422435	AT2G47480	4.71256	4.47075	4.29838	4.69648	4.6529	4.85847	4.63198	4.51758	4.6711	4.30399	4.68027	3.78692	5.16909	5.67277	4.73057	5.12754	5.29539	4.67042	4.3932	4.67896	5.18182	4.71676	4.77646	5.0496	0.456529	1.20202	0.432189	0.431058	0.642495	-0.188048	-0.080581	0.046831	0.372726	-0.392489	0.027378	-1.07154	-0.775887	-0.993818	0.451255	-0.410778	-0.518936	0.379183	-0.695306	-1.04065	0.078529	-0.018289	-0.546314	1.45073
13422513	AT2G47750	6.52913	5.39378	4.86264	5.57267	6.41381	6.30089	6.24391	5.60715	5.33166	5.18934	6.25894	5.67577	7.01692	6.64064	5.73151	5.1734	7.40056	7.0205	6.08781	6.10841	6.09011	5.39195	6.88086	6.61634	0.487792	1.24686	0.868866	-0.399261	0.986752	0.719605	-0.285221	0.213373	0.469024	-0.383322	-0.154868	-0.625125	-0.929116	-0.532234	0.358603	0.218548	-0.519696	-0.404157	-0.643895	-0.745607	-0.110421	0.60187	-0.364828	0.220968
13422750	AT3G01175	3.54198	3.72081	3.37321	3.94664	3.85242	3.60719	3.55895	3.43263	3.43738	3.59433	4.02486	3.59096	4.52444	4.77317	5.53966	5.36447	6.22302	5.26845	5.20284	4.735	4.87433	5.33041	5.20604	4.85508	0.982453	1.05236	2.16645	1.41783	2.37059	1.66125	0.016964	-0.28818	0.064178	-0.352309	0.172434	-0.016235	0.678404	-0.038164	-0.665329	-0.03406	-1.01698	-0.413363	0.66144	0.250016	-0.729507	0.318249	-1.18941	-0.397128
13423061	AT3G01880	3.75875	3.8241	3.35321	3.72875	3.42199	3.33099	3.72342	3.95401	3.56563	3.62714	3.70466	3.92095	3.56046	3.48897	4.01798	4.24224	3.81174	3.69388	4.8049	3.71291	3.6398	3.64034	3.60447	3.98886	-0.198292	-0.335136	0.664774	0.513489	0.389746	0.362891	-0.035339	0.129903	0.21242	-0.101614	0.282671	0.589959	1.24444	0.223946	-0.378182	-0.601903	-0.207265	0.29498	1.27978	0.094043	-0.590602	-0.500289	-0.489936	-0.294979
13423081	AT3G01961	3.72648	3.47209	3.25265	4.42895	3.85778	3.79483	3.68547	3.70148	3.92391	4.80268	3.59825	3.40807	4.35106	4.05225	3.99261	4.07149	3.93625	3.7296	3.62055	4.20053	4.30397	4.37472	3.84672	4.10105	0.624587	0.580157	0.739962	-0.357467	0.078476	-0.06523	-0.041006	0.229385	0.671268	0.373727	-0.259529	-0.386762	-0.730509	0.148284	0.311365	0.303229	-0.08953	0.371454	-0.689503	-0.081101	-0.359903	-0.070498	0.169999	0.758216
13423178	AT3G02125	3.6094	3.16603	3.32968	3.63238	3.62024	3.21432	3.41559	3.26357	3.27556	3.49824	3.46415	3.36409	4.36413	3.47771	3.90331	3.26469	3.90973	3.99585	3.37948	3.72003	3.90477	3.30153	3.57932	3.74532	0.754731	0.311685	0.573629	-0.367692	0.289494	0.781524	-0.193812	0.097547	-0.054124	-0.134137	-0.156088	0.149768	-0.984653	0.242317	0.001454	0.036841	-0.330415	-0.250521	-0.790841	0.14477	0.055578	0.170978	-0.174327	-0.400289
13423224	AT3G02240	3.16243	2.90919	3.75605	3.51986	3.09866	3.22248	2.88375	3.40604	3.48312	3.02027	3.83724	3.26318	3.20367	3.03786	2.84987	3.52698	3.44267	3.37776	4.19048	3.09399	4.332	4.27895	3.18395	3.85771	0.041246	0.128672	-0.906181	0.007115	0.344012	0.155282	-0.278678	0.496849	-0.272938	-0.499593	0.738583	0.040697	0.986804	0.05613	1.48213	0.751973	-0.258718	0.479946	1.26548	-0.440719	1.75507	1.25157	-0.997301	0.439249
13423358	AT3G02500	5.00392	3.42422	3.68302	4.09004	4.54175	5.12184	5.37426	3.82693	3.83014	3.67235	5.05998	6.13853	4.13297	3.30232	3.84947	4.18623	4.71722	5.20811	3.27239	3.46548	3.52191	3.7304	5.05784	6.09637	-0.870959	-0.121901	0.166445	0.096183	0.175472	0.086267	0.370332	0.402708	0.147119	-0.417693	0.518235	1.01669	-0.860571	0.163155	-0.327551	-0.455823	0.340618	0.888261	-1.2309	-0.239553	-0.47467	-0.03813	-0.177617	-0.128431
13424191	AT3G04545	2.54341	2.66994	2.80161	2.41125	2.96212	2.9995	2.59339	2.52804	2.58451	2.40586	2.62934	2.75799	3.23306	2.58896	2.81566	2.66195	3.19628	2.63946	2.3173	2.74497	2.5096	2.64247	3.26777	2.6185	0.689648	-0.080975	0.01405	0.250704	0.234163	-0.360034	0.049982	-0.141901	-0.217099	-0.005388	-0.33278	-0.241507	-0.915761	0.156003	-0.306062	-0.019479	0.071488	-0.020958	-0.965743	0.297904	-0.088963	-0.014091	0.404268	0.220549
13424313	AT3G04854	6.28867	6.50289	7.33689	5.50919	5.60884	5.18118	6.3969	5.79207	6.61769	6.75616	6.39304	6.00938	5.67399	5.98344	7.61251	6.35005	6.52754	6.357	6.43466	6.56203	7.55863	6.46583	7.16001	6.47344	-0.614675	-0.519443	0.275618	0.840862	0.918697	1.17582	0.108229	-0.710822	-0.719201	1.24697	0.784198	0.828196	0.760662	0.578586	-0.053876	0.11578	0.632478	0.11644	0.652433	1.28941	0.665325	-1.13119	-0.15172	-0.711756
13424443	AT3G05150	4.57365	5.01202	5.22394	4.62213	4.4931	4.23915	4.83782	4.54695	4.5162	4.54971	4.60753	4.25492	4.11031	4.66243	5.25851	4.11532	4.06743	4.13324	5.01954	4.473	4.71555	4.23815	3.55356	3.85045	-0.463339	-0.349585	0.034564	-0.506814	-0.425664	-0.105903	0.264168	-0.465063	-0.707738	-0.072425	0.11443	0.015772	0.909229	-0.18943	-0.542953	0.122834	-0.513876	-0.282792	0.645061	0.275633	0.164785	0.195259	-0.628306	-0.298564
13424788	AT3G05727	6.59216	6.81066	4.24535	6.39855	4.74725	5.36082	6.91892	4.95769	5.59529	4.69038	5.58701	4.31557	5.60135	6.39816	5.7697	6.32934	6.33626	6.33109	6.51789	6.27444	6.42492	7.0189	6.64984	6.13602	-0.990809	-0.412501	1.52435	-0.069204	1.589	0.970271	0.326758	-1.85297	1.34994	-1.70817	0.839761	-1.04525	0.916542	-0.12372	0.655212	0.689559	0.313587	-0.195075	0.589784	1.72925	-0.694724	2.39772	-0.526174	0.850171
13424952	AT3G06240	5.07556	5.26858	5.06426	5.08515	5.12303	5.16461	5.44674	5.20285	5.08519	5.39788	4.96735	5.13251	5.18429	5.02979	4.77321	4.64239	4.69931	4.93596	4.51455	5.31459	5.03683	4.87612	4.9275	5.06844	0.108729	-0.238792	-0.291045	-0.44276	-0.423719	-0.228643	0.371178	-0.065728	0.020931	0.312726	-0.155684	-0.032092	-0.669737	0.284795	0.263618	0.233732	0.228182	0.132476	-1.04092	0.350523	0.242687	-0.078994	0.383866	0.164568
13425030	AT3G06460	3.29521	3.89703	3.67534	3.67034	3.62566	4.23375	3.30508	3.3043	3.50285	3.39396	3.42797	3.77149	3.39108	3.62487	3.71011	3.69317	3.61722	4.12779	4.45912	3.64696	3.15119	3.30288	4.1078	3.22482	0.095871	-0.272164	0.034778	0.022828	-0.00844	-0.105957	0.009875	-0.59273	-0.172485	-0.27638	-0.19769	-0.462257	1.06804	0.022089	-0.558923	-0.390289	0.490578	-0.902969	1.05817	0.614819	-0.386438	-0.113909	0.688268	-0.440712
13425269	AT3G06890	3.88751	4.06257	4.26557	4.2161	3.65252	4.33576	3.73457	3.69396	3.56563	4.87378	4.50099	5.40754	4.59491	4.17802	4.00711	4.78285	4.34504	5.07104	5.37029	4.43065	4.0627	5.55209	4.78558	5.12774	0.7074	0.115452	-0.25846	0.566745	0.692525	0.735276	-0.152945	-0.368602	-0.699939	0.657674	0.848477	1.07177	0.775378	0.252628	0.055595	0.769246	0.440544	0.056698	0.928323	0.62123	0.755534	0.111572	-0.407933	-1.01507
13425799	AT3G08660	7.18051	7.40891	6.96504	7.52911	7.4917	6.80746	7.39523	7.39197	6.81681	7.11942	7.23786	6.19218	7.2486	7.50941	6.95215	7.48794	7.35442	6.34184	6.41394	6.96285	6.91322	7.05634	6.90175	6.52833	0.068091	0.100501	-0.012894	-0.041163	-0.137287	-0.465617	0.214721	-0.016942	-0.14823	-0.409691	-0.253839	-0.615276	-0.834666	-0.546564	-0.038927	-0.431603	-0.452661	0.186488	-1.04939	-0.529622	0.109303	-0.021912	-0.198822	0.801764
13426336	AT3G10185	4.11205	4.68019	4.29834	4.50229	5.28873	4.92272	4.00985	5.23101	3.97599	4.13356	4.42724	4.57828	4.77019	4.52662	4.52095	4.94799	4.43055	4.84629	3.81028	4.19241	4.06977	4.29692	4.6311	4.48208	0.658133	-0.153577	0.222606	0.445701	-0.85818	-0.076431	-0.102201	0.550817	-0.322358	-0.368733	-0.861489	-0.344448	-0.95991	-0.334208	-0.451177	-0.65107	0.200546	-0.364214	-0.857709	-0.885025	-0.128819	-0.282337	1.06204	-0.019766
13426529	AT3G10526	3.2653	3.26836	3.483	2.83738	4.11235	3.15564	3.2424	4.29079	3.57191	3.46439	2.81471	3.31114	3.25778	3.39053	3.57563	2.94193	3.21984	3.14137	4.40976	3.50408	3.63257	3.70179	3.75956	3.17115	-0.007522	0.122168	0.092628	0.10455	-0.892509	-0.014272	-0.022901	1.02243	0.088903	0.62701	-1.29764	0.155499	1.15198	0.113546	0.056939	0.759852	0.539715	0.029782	1.17488	-0.908885	-0.031964	0.132842	1.83736	-0.125717
13426630	AT3G10845	2.98076	3.15892	2.85728	3.20091	3.1911	3.22664	3.16904	2.96675	3.24198	3.1764	3.15729	3.08147	3.52232	3.62187	3.03017	3.28492	3.0468	3.1612	2.82576	3.2131	3.59545	3.15952	3.18777	3.41854	0.541558	0.462953	0.172886	0.084009	-0.144298	-0.065444	0.18828	-0.19217	0.384697	-0.024509	-0.033807	-0.145175	-0.696566	-0.408773	0.565283	-0.125403	0.140968	0.257342	-0.884846	-0.216603	0.180586	-0.100894	0.174775	0.402517
13426792	AT3G11340	7.81556	5.50995	5.23083	5.28057	5.65372	5.47363	8.12615	7.08598	7.53156	6.5268	9.43802	9.92194	8.64777	8.27882	7.39822	8.67672	8.27143	9.82554	9.94489	9.5543	8.41872	9.80668	10.3321	10.1306	0.832211	2.76886	2.16739	3.39615	2.6177	4.35191	0.310589	1.57603	2.30073	1.24623	3.7843	4.4483	1.29712	1.27549	1.02051	1.12996	2.06069	0.305079	0.986527	-0.300544	-1.28022	-0.116266	-1.72361	-4.14322
13427228	AT1G79290	2.70765	3.21525	2.83437	2.52682	2.74903	2.78864	2.27282	3.65083	2.84041	2.64175	2.45515	2.61025	3.69838	2.69813	2.86017	3.07984	2.59056	2.76133	2.91773	2.84041	3.64373	3.09156	2.62901	3.26118	0.990728	-0.517123	0.025807	0.553017	-0.158474	-0.027313	-0.43484	0.435583	0.006039	0.114933	-0.29388	-0.17839	-0.780652	0.142277	0.783557	0.011723	0.038451	0.499845	-0.345812	-0.293306	0.777518	-0.10321	0.332331	0.678235
13427376	AT3G12890	4.14654	3.59346	3.42925	4.17008	3.12249	4.03976	4.37506	3.15413	3.50759	3.36759	3.71316	3.68124	4.38593	3.79606	3.8686	3.73439	3.89791	4.45546	3.72716	3.70114	3.93489	3.9948	3.57202	4.04468	0.239394	0.202603	0.439346	-0.435691	0.775416	0.4157	0.228528	-0.43933	0.078345	-0.802486	0.590668	-0.358518	-0.658768	-0.094915	0.066294	0.260412	-0.325888	-0.410779	-0.887296	0.344415	-0.012051	1.0629	-0.916556	-0.052261
13427643	AT3G13433	5.17216	5.0507	4.61595	4.90307	4.70595	4.08485	5.14178	5.12167	5.12467	5.54152	5.22869	5.94775	6.79598	5.77584	6.1192	7.76297	6.05998	6.68565	7.52893	6.77143	6.98503	7.38159	6.63189	8.2281	1.62381	0.725146	1.50325	2.8599	1.35403	2.6008	-0.030384	0.070971	0.508722	0.638451	0.522738	1.8629	0.732951	0.995584	0.865837	-0.381386	0.571913	1.54245	0.763335	0.924613	0.357115	-1.01984	0.049175	-0.320449
13427730	AT3G13610	3.79835	3.50915	3.61388	3.474	2.98025	4.04401	3.91312	4.37999	4.11063	3.57969	6.33366	8.01942	4.76266	5.77459	4.7473	5.76445	5.41141	7.70725	6.17238	6.95617	5.12836	6.93542	7.76495	8.3346	0.964307	2.26544	1.13342	2.29045	2.43116	3.66324	0.11477	0.870837	0.496743	0.105685	3.35341	3.9754	1.40972	1.18158	0.381058	1.17096	2.35354	0.627345	1.29495	0.310738	-0.115685	1.06528	-0.999864	-3.34806
13427742	AT3G13650	5.46847	5.79213	5.42675	6.53275	6.15196	6.3481	5.57089	5.61784	5.42922	5.90546	6.33263	6.04022	5.39169	4.94298	5.28087	5.27538	5.78199	5.89771	4.36939	4.48161	4.70084	5.78594	5.72616	5.54235	-0.076778	-0.849154	-0.145885	-1.25738	-0.369974	-0.450393	0.102418	-0.174294	0.002468	-0.627289	0.180665	-0.307886	-1.0223	-0.461368	-0.580028	0.510568	-0.055829	-0.355366	-1.12472	-0.287074	-0.582496	1.13786	-0.236494	-0.04748
13427750	AT3G13662	4.50557	5.13395	5.50636	5.18971	4.35072	5.07642	4.56279	4.5406	5.16763	4.62632	4.94246	5.22237	4.41173	4.71535	4.83838	4.80789	4.85083	4.64271	5.12542	5.09696	5.1622	4.87129	4.81551	4.54845	-0.093834	-0.418596	-0.667974	-0.38182	0.500106	-0.433704	0.057218	-0.593345	-0.338732	-0.563393	0.591737	0.145954	0.713691	0.381612	0.323815	0.063397	-0.035321	-0.09426	0.656473	0.974957	0.662547	0.62679	-0.627058	-0.240214
13427922	AT3G13950	7.28941	7.0013	6.22866	6.06732	6.51438	6.91398	7.74119	7.53155	8.02828	7.33652	8.55047	9.65261	8.07394	7.69765	7.81536	7.56975	7.85823	8.6844	8.99287	8.7047	8.1457	8.17404	8.8608	9.59618	0.784531	0.696352	1.5867	1.50243	1.34386	1.77042	0.451782	0.530255	1.79962	1.26921	2.0361	2.73863	0.918934	1.00705	0.330342	0.604288	1.00256	0.911779	0.467152	0.476798	-1.46928	-0.66492	-1.03353	-1.82685
13428190	AT3G14620	8.58444	8.86743	9.35654	7.98954	8.89081	9.48431	9.16622	9.49559	10.2273	8.5933	10.1439	10.3124	9.08286	9.44413	9.85769	8.81273	9.68772	9.77116	9.99573	10.0625	10.0976	9.21507	10.0344	10.0168	0.498425	0.576697	0.501143	0.823195	0.796913	0.286843	0.581784	0.628161	0.870786	0.603765	1.25304	0.828086	0.912865	0.618412	0.239953	0.40234	0.346701	0.245663	0.331081	-0.009749	-0.630833	-0.201425	-0.906343	-0.582423
13428695	AT3G15500	6.10445	5.53094	5.03512	3.68171	4.9612	4.35	5.97366	6.36951	5.86254	4.68056	4.80176	6.57412	6.38732	6.15154	5.69817	4.80263	4.9344	4.9498	7.31455	7.22057	5.98113	6.1372	4.65573	6.03479	0.282876	0.620599	0.66306	1.12092	-0.026801	0.599803	-0.130788	0.838569	0.82743	0.998852	-0.159435	2.22412	0.927228	1.06903	0.282955	1.33457	-0.278665	1.08499	1.05802	0.23046	-0.544475	0.33572	-0.11923	-1.13913
13428707	AT3G15518	7.24692	6.13362	5.80798	6.15917	6.09653	5.56293	7.29141	6.43903	6.71372	6.2355	6.39166	6.32919	7.60337	6.81038	6.64306	6.55651	6.68468	6.61342	8.42603	7.94248	7.04493	7.09354	6.72613	6.76141	0.356456	0.676758	0.835078	0.397337	0.588152	1.05049	0.044493	0.305407	0.905739	0.076327	0.295134	0.766263	0.822655	1.1321	0.401875	0.537035	0.041451	0.147986	0.778162	0.826696	-0.503864	0.460708	-0.253683	-0.618277
13429098	AT3G16360	5.63546	7.43515	7.53654	7.17982	7.0068	6.83522	5.7373	6.84092	7.13874	7.47994	7.06571	5.62978	4.84009	6.59245	6.11114	6.04714	6.1809	4.53855	5.84922	6.33762	6.42796	6.32686	5.28773	4.52675	-0.795376	-0.842696	-1.4254	-1.13268	-0.8259	-2.29667	0.101835	-0.594228	-0.397801	0.30012	0.058914	-1.20544	1.00913	-0.254833	0.316819	0.279725	-0.893173	-0.011803	0.907294	0.339395	0.71462	-0.020395	-0.952087	1.19364
13429370	AT3G16980	6.56684	6.78781	6.26411	6.43322	6.81572	7.32513	6.36561	6.32502	6.90832	6.26476	7.45257	7.96775	7.6281	7.14414	7.6704	7.06679	7.33497	7.4057	6.93188	7.13037	7.35393	7.25422	7.52027	7.66498	1.06125	0.356333	1.40629	0.633569	0.519253	0.080574	-0.201231	-0.462792	0.644208	-0.168467	0.636858	0.642626	-0.696212	-0.013778	-0.316468	0.187428	0.185298	0.259276	-0.494981	0.449014	-0.960676	0.355895	-0.45156	-0.38335
13429536	AT3G17400	3.64865	3.57954	3.27967	3.58351	3.71693	3.26979	3.56192	3.90167	4.60525	4.19758	3.48681	3.17359	6.08711	5.88349	5.88007	5.5455	5.87476	5.64109	4.53206	5.85557	5.60463	5.4561	5.95625	4.80905	2.43845	2.30395	2.6004	1.96199	2.15783	2.37129	-0.086732	0.322128	1.32558	0.614074	-0.230119	-0.096203	-1.55505	-0.027922	-0.27544	-0.089401	0.081487	-0.832039	-1.46832	-0.35005	-1.60102	-0.703475	0.311606	-0.735836
13429623	AT3G17660	6.49116	6.79606	6.79801	6.74165	6.6118	6.85039	6.87491	6.72252	7.12299	6.72909	7.02586	6.24947	6.38708	7.51241	6.93208	6.93496	6.73751	6.71966	7.07558	7.10644	7.1151	6.95554	7.02559	6.34988	-0.104086	0.716344	0.134071	0.193312	0.125714	-0.130732	0.383752	-0.073537	0.324978	-0.01256	0.41406	-0.600921	0.688507	-0.405964	0.183019	0.020582	0.288074	-0.369773	0.304755	-0.332427	-0.141959	0.033142	-0.125986	0.231148
13429678	AT3G17712	4.83835	4.91599	5.3613	4.11366	3.99862	4.52835	4.86341	5.58458	4.36773	3.69719	4.67485	4.80263	4.80142	5.33798	3.06034	2.9636	4.16097	4.38017	5.63469	5.05919	5.05371	4.25393	5.2194	4.01361	-0.036924	0.421991	-2.30096	-1.15005	0.16235	-0.148184	0.025069	0.668591	-0.993573	-0.416472	0.676228	0.27428	0.833265	-0.278792	1.99337	1.29032	1.05843	-0.366554	0.808196	-0.947383	2.98694	1.7068	0.382206	-0.640834
13429743	AT3G17830	6.70514	7.15958	7.17324	7.21569	6.3833	6.92146	6.61057	7.08259	6.83394	7.15728	6.53367	6.43599	7.30692	7.39739	6.9879	7.09309	6.71777	7.43066	6.3186	6.77987	7.02216	6.49142	7.06303	6.91915	0.601778	0.23781	-0.185335	-0.122594	0.334469	0.509202	-0.094573	-0.07699	-0.339298	-0.058409	0.150369	-0.485465	-0.988321	-0.617515	0.034251	-0.601669	0.345259	-0.511514	-0.893748	-0.540525	0.373549	-0.54326	0.19489	-0.026049
13429787	AT3G17890	6.3252	5.34462	5.5754	5.49548	5.47372	5.33396	6.22442	5.4902	5.6049	5.47431	5.29779	4.76785	4.79777	4.83837	4.24694	4.44727	4.56199	4.47379	4.08208	4.60994	4.57302	4.49208	4.56405	4.5928	-1.52742	-0.506248	-1.32846	-1.04821	-0.911736	-0.860174	-0.100773	0.145579	0.029496	-0.021172	-0.175933	-0.566111	-0.715697	-0.228431	0.326077	0.044809	0.002063	0.119012	-0.614924	-0.37401	0.296581	0.065981	0.177996	0.685123
13430195	AT3G18550	6.06923	6.02331	6.05805	5.4446	5.36949	5.36298	6.54013	6.02517	5.30666	5.28448	5.21649	5.34814	6.20875	6.97766	6.653	6.8377	7.41509	6.50179	6.93947	7.16174	6.47185	6.07838	6.79886	6.02517	0.139519	0.95435	0.594946	1.3931	2.04561	1.13881	0.470904	0.001867	-0.751395	-0.160124	-0.152996	-0.014849	0.730727	0.184082	-0.181149	-0.759323	-0.616228	-0.476616	0.259823	0.182215	0.570246	-0.599199	-0.463232	-0.461767
13430202	AT3G18560	8.29647	7.51852	6.82329	7.51088	7.67641	7.17746	8.11162	7.72311	6.90797	7.62107	7.24514	7.07509	7.30547	6.34233	6.50418	7.13103	7.24368	6.79762	8.09971	6.42603	6.1186	6.60771	7.29016	7.08325	-0.991007	-1.17619	-0.319112	-0.379851	-0.432729	-0.379842	-0.18485	0.204594	0.084683	0.110189	-0.43127	-0.102368	0.794244	0.083704	-0.385578	-0.523319	0.046483	0.285638	0.979094	-0.12089	-0.470261	-0.633508	0.477753	0.388006
13430261	AT3G18840	5.62037	6.30405	6.31214	6.43715	5.14795	5.66361	5.47857	5.97075	6.13476	5.82109	5.74032	5.87566	6.45722	6.6245	6.70001	6.85256	5.98147	6.21027	5.57194	6.19421	6.51217	6.32402	6.06554	5.88477	0.83685	0.320454	0.387878	0.415404	0.833524	0.546661	-0.141803	-0.3333	-0.177377	-0.616063	0.592369	0.212049	-0.885286	-0.430293	-0.187843	-0.528542	0.08407	-0.325502	-0.743483	-0.096993	-0.010466	0.087521	-0.508299	-0.537551
13430867	AT3G20090	6.36693	6.47622	6.65165	5.94765	5.9637	5.91741	6.49193	6.35524	6.01262	6.19382	5.757	6.24448	6.2059	6.19306	7.19164	6.98274	6.76733	6.71281	6.97485	6.82109	7.02356	6.93676	7.52693	6.59144	-0.161029	-0.283152	0.53999	1.03509	0.803624	0.795403	0.125006	-0.120972	-0.63903	0.246168	-0.206707	0.327076	0.768954	0.628025	-0.168079	-0.045979	0.759603	-0.121374	0.643948	0.748997	0.470951	-0.292147	0.96631	-0.44845
13430874	AT3G20100	6.267	7.36199	7.92448	7.28794	7.97067	8.43534	6.49121	7.077	7.63283	7.45616	7.96912	8.36808	5.65091	7.43965	7.56599	8.00437	7.76762	8.19183	6.5892	7.1637	7.7242	7.67289	8.05264	8.35912	-0.616091	0.077666	-0.358485	0.716433	-0.203046	-0.243513	0.224212	-0.284983	-0.29165	0.168219	-0.00155	-0.067257	0.938285	-0.275952	0.158212	-0.331479	0.285018	0.16729	0.714073	0.009031	0.449862	-0.499698	0.286568	0.234547
13430896	AT3G20140	3.61101	4.12654	4.12881	4.05954	4.70663	4.71777	4.01636	4.59015	3.71659	3.62279	4.50006	4.27882	4.70754	3.46843	4.74305	4.10648	4.292	4.35405	3.66203	4.04633	4.51889	4.41507	4.34385	4.24661	1.09653	-0.658105	0.614233	0.046939	-0.41463	-0.363718	0.405352	0.463608	-0.412217	-0.436758	-0.206569	-0.438942	-1.04551	0.577893	-0.224159	0.308584	0.051852	-0.107434	-1.45087	0.114285	0.188058	0.745342	0.258421	0.331508
13431169	AT3G20590	3.51161	4.55065	3.82112	3.82031	3.68218	3.97289	3.58046	3.9538	3.26108	4.11785	3.45475	3.61377	4.3313	3.19688	3.89903	3.74559	3.67656	3.49674	3.32798	4.19972	3.86912	3.43545	4.01113	3.51606	0.819694	-1.35377	0.077907	-0.074723	-0.005623	-0.47616	0.06885	-0.596847	-0.560043	0.297539	-0.227429	-0.359122	-1.00332	1.00284	-0.029913	-0.310138	0.334574	0.019322	-1.07217	1.59969	0.53013	-0.607677	0.562003	0.378444
13431323	AT3G20980	3.62252	3.86867	3.68171	3.8374	3.71014	3.74443	3.50858	3.70412	3.28915	3.49708	3.8664	4.55695	3.42888	3.96998	3.65323	3.24178	3.70861	3.60682	4.13396	3.77276	4.17604	3.40933	4.12437	3.45668	-0.193641	0.10131	-0.028484	-0.595619	-0.001534	-0.137605	-0.113941	-0.16455	-0.392562	-0.340325	0.156258	0.812524	0.705079	-0.197223	0.522812	0.16755	0.415756	-0.150138	0.81902	-0.032673	0.915374	0.507875	0.259498	-0.962662
13431522	AT3G21520	2.85906	2.56178	2.14916	2.39418	2.45845	1.96724	2.70869	2.90993	2.59312	2.51198	2.72484	3.22933	4.54507	2.95875	2.83968	3.66108	3.1912	3.69126	5.29517	3.0973	2.88524	3.80424	3.55148	3.78888	1.686	0.396968	0.690515	1.2669	0.732741	1.72402	-0.150371	0.348154	0.44396	0.117802	0.266381	1.26209	0.750102	0.138554	0.045565	0.143167	0.360281	0.097616	0.900473	-0.2096	-0.398395	0.025365	0.0939	-1.16447
13431540	AT3G21700	6.11616	5.98963	6.28635	6.00562	6.576	6.70071	6.43869	6.02951	6.05282	6.11346	6.7835	7.25502	6.49248	5.76299	6.41183	6.45026	6.76433	6.89258	7.23307	6.78273	6.41926	6.78456	7.06469	7.36041	0.376312	-0.226641	0.12548	0.444646	0.188327	0.191873	0.322522	0.039874	-0.23353	0.107841	0.207499	0.55431	0.74059	1.01974	0.007434	0.334298	0.300364	0.467827	0.418068	0.979865	0.240964	0.226457	0.092865	-0.086483
13431605	AT3G21930	3.36472	3.58303	2.9922	3.36953	2.93475	3.52632	3.05765	3.30933	3.06723	4.59431	2.88309	3.2405	3.14506	4.37229	3.22585	3.46496	3.06292	3.85496	4.29239	4.36036	3.79771	5.02773	4.79525	3.10166	-0.219661	0.789258	0.233648	0.095431	0.128167	0.328642	-0.307069	-0.273703	0.075036	1.22478	-0.051657	-0.285819	1.14733	-0.011932	0.571861	1.56277	1.73233	-0.753303	1.4544	0.261771	0.496825	0.337994	1.78399	-0.467484
13431614	AT3G21950	8.12477	8.72727	9.07504	8.98011	9.16522	9.55899	8.01609	8.59933	8.71183	8.48005	9.35607	8.43355	9.09586	9.61437	9.41299	9.63099	9.99766	9.53498	8.39931	9.08714	9.64012	9.43714	9.65931	9.00481	0.971087	0.887099	0.337942	0.650874	0.832435	-0.024006	-0.108681	-0.12794	-0.363216	-0.500063	0.19085	-1.12544	-0.696547	-0.527221	0.227131	-0.19384	-0.338349	-0.530168	-0.587866	-0.399281	0.590347	0.306223	-0.529199	0.595274
13431668	AT3G22060	9.41246	8.60214	8.14349	8.20723	9.26018	8.60411	9.8627	9.04033	9.02657	8.75185	9.03608	8.80819	9.83116	8.79167	8.31726	8.61112	9.46529	8.87224	10.5802	9.45415	9.07418	9.49728	9.58213	9.46472	0.418697	0.189533	0.173768	0.403892	0.205106	0.268129	0.450235	0.438195	0.883077	0.544619	-0.224105	0.204079	0.749011	0.662476	0.756923	0.886153	0.116842	0.592477	0.298776	0.224281	-0.126154	0.341534	0.340947	0.388398
13431808	AT3G22370	7.54444	7.0818	6.53732	6.96326	6.83219	7.67634	7.91431	7.23512	7.28364	6.95775	7.46501	8.28884	8.08412	7.63402	7.38198	6.99633	7.43026	7.9588	8.84297	8.13948	7.63222	7.78094	7.76945	8.80485	0.539672	0.552215	0.844664	0.033071	0.598072	0.282456	0.369867	0.153323	0.746321	-0.005508	0.632825	0.612502	0.75886	0.505463	0.250238	0.78461	0.339196	0.84605	0.388993	0.35214	-0.496083	0.790118	-0.293629	0.233548
13432018	AT3G22961	5.26052	5.0119	4.62859	4.93231	5.67006	5.86848	5.54126	5.33959	5.04278	4.70603	5.05042	5.12402	4.43739	5.27609	5.1936	5.24068	5.66231	5.53412	5.24754	5.10277	5.39402	4.82592	5.72553	5.47631	-0.823135	0.26419	0.565006	0.308366	-0.007753	-0.334363	0.280738	0.327691	0.414188	-0.226285	-0.61964	-0.744457	0.810155	-0.173315	0.200425	-0.414761	0.063214	-0.057804	0.529417	-0.501006	-0.213763	-0.188476	0.682854	0.686653
13432079	AT3G23100	7.85401	7.78532	7.698	7.18784	7.19901	7.54205	8.05004	7.76047	7.88912	7.33881	7.8554	7.81758	5.72499	7.23216	6.41841	7.04773	6.1177	6.96386	6.89261	6.6955	6.52093	6.1462	6.65827	6.05562	-2.12902	-0.553159	-1.27959	-0.140107	-1.08131	-0.578188	0.196023	-0.02485	0.19112	0.150966	0.656385	0.27553	1.16762	-0.53666	0.102517	-0.901536	0.540569	-0.908242	0.971597	-0.51181	-0.088603	-1.0525	-0.115816	-1.18377
13432428	AT3G23630	4.08671	4.01757	4.54543	4.86008	4.41816	4.01918	3.84671	4.32151	4.18594	4.83112	4.07158	4.71926	4.95171	4.04767	4.70059	5.27772	4.64942	4.09202	4.10684	4.25787	4.72132	4.87744	4.6993	5.16096	0.865001	0.030094	0.155156	0.417635	0.231266	0.072841	-0.240008	0.303932	-0.35949	-0.028966	-0.34658	0.700084	-0.844873	0.210207	0.020735	-0.400273	0.049875	1.06894	-0.604865	-0.093725	0.380225	-0.371307	0.396455	0.368857
13432761	AT3G24535	6.46574	6.23179	6.06529	6.78305	7.21671	6.68155	6.33535	7.22544	5.78073	6.05186	6.19911	6.05933	4.83188	4.6524	5.12045	5.73851	5.11852	5.79658	5.54949	5.16087	5.10422	5.25243	5.11384	5.73889	-1.63386	-1.57939	-0.944839	-1.04454	-2.09819	-0.884972	-0.130381	0.993655	-0.284563	-0.731197	-1.0176	-0.622221	0.717611	0.508476	-0.016233	-0.486077	-0.004677	-0.057687	0.847992	-0.485179	0.26833	0.24512	1.01292	0.564534
13432876	AT3G24790	3.5722	3.71525	3.90661	4.22371	3.93772	3.67993	3.62247	3.58258	3.95663	3.94272	3.68484	3.92819	4.07177	3.94249	4.09155	3.35466	3.53226	3.66725	3.33605	3.66227	3.71924	3.70387	3.73614	3.71368	0.499571	0.22723	0.184939	-0.869055	-0.405458	-0.012675	0.050269	-0.132677	0.050016	-0.28099	-0.252876	0.248259	-0.735728	-0.280211	-0.372306	0.34921	0.203876	0.046432	-0.785997	-0.147534	-0.422322	0.6302	0.456752	-0.201827
13432934	AT3G24929	7.3534	7.49488	7.44775	7.65387	7.73178	7.59241	7.15607	7.76357	7.79539	7.73707	7.43871	7.3987	6.52921	6.24597	6.69635	6.35593	6.07063	6.16838	5.54941	6.66892	6.39277	5.62568	6.00611	6.01446	-0.824189	-1.24891	-0.751405	-1.29795	-1.66115	-1.42403	-0.19733	0.268694	0.347643	0.083198	-0.29307	-0.193716	-0.979805	0.422956	-0.303573	-0.730247	-0.064523	-0.153919	-0.782475	0.154262	-0.651216	-0.813445	0.228547	0.039797
13432971	AT3G25060	5.85038	6.7742	7.08861	6.72748	5.95684	6.58701	5.84129	6.96889	6.32214	6.89836	6.09232	6.88424	5.81977	6.50009	6.22249	6.48959	6.16071	6.33365	6.5018	6.18032	6.21169	6.46064	6.15971	6.03711	-0.030606	-0.274106	-0.866126	-0.237884	0.203862	-0.253357	-0.009091	0.194693	-0.76647	0.170888	0.135471	0.297235	0.682029	-0.319776	-0.010793	-0.02895	-0.001	-0.296542	0.69112	-0.514469	0.755677	-0.199838	-0.136471	-0.593777
13433022	AT3G25221	5.46079	5.75037	5.68973	6.01065	5.57627	5.71522	5.57387	5.88179	5.81825	5.52843	5.97794	5.79617	5.57729	6.08968	5.58574	5.63879	5.39072	5.82998	4.86621	5.7304	5.14398	5.24036	5.80361	5.04342	0.116496	0.339307	-0.10399	-0.371854	-0.185549	0.114754	0.113077	0.131422	0.128522	-0.482222	0.401665	0.080948	-0.71108	-0.359279	-0.441763	-0.398438	0.412889	-0.786561	-0.824157	-0.490701	-0.570285	0.083784	0.011224	-0.867509
13433253	AT3G25780	5.06926	4.84291	4.62237	5.13774	4.77372	4.72214	5.39703	5.37221	5.51443	6.03433	6.34634	7.21058	6.43135	6.09926	6.19466	5.95974	5.86103	6.6018	7.39818	6.63918	6.54141	7.34551	7.45485	7.91495	1.36208	1.25635	1.57229	0.821992	1.0873	1.87966	0.32777	0.529298	0.892066	0.896591	1.57262	2.48843	0.966833	0.539922	0.346755	1.38577	1.59382	1.31316	0.639063	0.010624	-0.545311	0.489181	0.021199	-1.17528
13433258	AT3G25790	3.74532	4.24269	4.01258	3.92987	3.85189	4.06306	4.32686	4.77425	4.07764	4.05924	3.87212	4.05728	3.73503	4.2931	3.97343	4.13329	3.85952	4.20519	4.479	4.06521	4.03621	4.42199	4.22996	3.91035	-0.010285	0.050409	-0.039156	0.203417	0.00763	0.142127	0.581541	0.531561	0.065057	0.129363	0.020233	-0.005776	0.743963	-0.22789	0.062781	0.288698	0.370442	-0.294838	0.162422	-0.759451	-0.002276	0.159335	0.350209	-0.289062
13433466	AT3G26200	10.2949	8.63818	8.82378	9.23235	9.24865	8.02356	9.91905	8.85288	9.69913	9.83182	8.65623	7.18452	6.23077	6.16267	5.91282	5.79233	5.5471	4.62212	7.04618	6.46556	6.06016	5.19689	5.09908	5.26312	-4.06409	-2.47552	-2.91097	-3.44003	-3.70154	-3.40144	-0.375814	0.214697	0.875345	0.59947	-0.592413	-0.839042	0.815407	0.302892	0.147348	-0.595439	-0.448024	0.641	1.19122	0.088195	-0.727997	-1.19491	0.144389	1.48004
13433587	AT3G26620	3.55042	3.97519	4.36089	4.10177	3.62789	3.74135	3.82643	3.34354	3.86209	4.44365	4.40804	4.33347	4.15917	3.798	3.62495	4.15917	3.7313	3.58364	4.81679	3.88873	4.23081	4.28822	3.77307	3.99614	0.608745	-0.177189	-0.735948	0.057402	0.103415	-0.157713	0.276009	-0.631649	-0.498802	0.341883	0.780151	0.592119	0.65762	0.090731	0.605861	0.129047	0.041766	0.412508	0.381611	0.72238	1.10466	-0.212836	-0.738385	-0.179611
13433719	AT3G26820	3.76765	4.10882	3.77161	3.24866	3.6384	3.51989	4.11126	3.80228	3.56018	3.38564	3.20283	3.26085	4.14809	4.31277	3.7756	3.94693	3.81789	3.3589	4.7904	4.23278	4.00817	3.311	3.96806	4.04685	0.380437	0.203952	0.003992	0.69827	0.179496	-0.160991	0.34361	-0.306535	-0.211427	0.136978	-0.435568	-0.259041	0.642317	-0.079996	0.232565	-0.635937	0.150169	0.687944	0.298707	0.226539	0.443992	-0.772915	0.585737	0.946985
13433771	AT3G26930	2.40763	3.11617	3.1603	3.01636	3.44982	2.85601	2.4722	3.04199	2.38422	2.85298	2.99784	3.40606	3.12731	3.22534	3.90612	3.05067	3.05067	2.93118	4.3702	3.63056	3.90514	3.67529	3.38933	3.33644	0.719679	0.109173	0.745821	0.034311	-0.399151	0.075166	0.064567	-0.074181	-0.776088	-0.163384	-0.451987	0.550052	1.24289	0.405219	-0.00099	0.624621	0.338654	0.40526	1.17833	0.4794	0.775098	0.788005	0.790641	-0.144792
13433945	AT3G27440	3.19549	3.31511	3.15414	3.54022	3.2408	3.26739	3.35881	3.9538	3.41843	3.7887	3.64896	3.32156	4.25909	3.85685	3.92158	4.00115	4.00067	3.59876	3.41331	3.88802	4.46602	4.43981	3.65936	3.25795	1.0636	0.541741	0.76744	0.460929	0.759871	0.331368	0.163324	0.638698	0.264291	0.24848	0.408159	0.054167	-0.845786	0.031175	0.54444	0.438661	-0.341316	-0.340805	-1.00911	-0.607523	0.280149	0.190181	-0.749475	-0.394972
13433982	AT3G27540	6.26521	6.09225	6.0651	6.09575	6.44313	6.25558	6.74028	5.48943	5.99248	6.27344	7.03357	6.62801	5.91338	6.30939	6.26521	6.65671	6.86933	6.82491	6.583	5.94802	5.90355	6.49938	7.09256	6.98869	-0.351832	0.217144	0.20011	0.560963	0.426202	0.569334	0.475069	-0.602821	-0.072616	0.177697	0.590448	0.372435	0.669625	-0.361373	-0.361653	-0.157328	0.223233	0.163777	0.194556	0.241448	-0.289037	-0.335025	-0.367215	-0.208658
13434166	AT3G28060	3.90353	3.19791	3.56884	4.53929	3.53402	3.89449	3.62955	3.43402	2.95302	3.95276	3.95461	3.02026	4.24289	3.86855	4.33021	5.00852	5.81253	4.33654	3.26521	3.83458	3.79384	4.93265	5.16048	4.04491	0.339368	0.670635	0.761363	0.469238	2.27851	0.44205	-0.273972	0.236103	-0.615826	-0.586524	0.42059	-0.874238	-0.977689	-0.033967	-0.536369	-0.075872	-0.652048	-0.291629	-0.703717	-0.27007	0.079457	0.510652	-1.07264	0.582609
13434192	AT3G28100	8.26691	8.1427	8.24593	8.19269	8.84575	8.85413	8.14062	8.06281	8.45006	8.25376	8.78467	8.92335	7.60098	8.41775	8.57998	8.19924	8.92648	8.79917	8.25531	8.70435	8.54999	8.65078	8.93961	9.03552	-0.665925	0.275055	0.334051	0.006546	0.080732	-0.054965	-0.126294	-0.079889	0.204126	0.061069	-0.061081	0.069215	0.654324	0.286602	-0.029997	0.451546	0.013132	0.236357	0.780618	0.366491	-0.234123	0.390477	0.074213	0.167142
13434244	AT3G28210	4.96026	4.62073	4.94334	3.58772	3.92988	3.92217	5.54165	4.51797	4.52577	4.12216	3.99752	5.59114	5.85573	4.37808	4.56533	4.4479	3.79812	4.83098	6.69052	5.82578	4.74867	4.53725	4.71513	6.06517	0.895469	-0.242658	-0.378009	0.860183	-0.131762	0.908812	0.581386	-0.10276	-0.417564	0.534442	0.067639	1.66897	0.834785	1.4477	0.18334	0.089349	0.917009	1.23419	0.253399	1.55046	0.600904	-0.445093	0.84937	-0.434773
13434277	AT3G28291	7.45534	7.61503	7.81455	7.50501	7.73054	7.94456	6.98048	8.57641	7.03723	6.92456	7.01144	8.01136	5.36396	4.32608	5.37147	5.77631	6.23236	4.81214	6.29669	5.39076	3.88047	5.05945	5.90961	5.34555	-2.09138	-3.28895	-2.44308	-1.7287	-1.49818	-3.13243	-0.474865	0.961376	-0.777327	-0.580457	-0.7191	0.066792	0.932733	1.06468	-1.491	-0.716862	-0.322756	0.53341	1.4076	0.1033	-0.713674	-0.136405	0.396344	0.466618
13434456	AT3G28899	4.0963	4.05707	3.95159	4.37292	3.12281	3.39968	3.55173	3.23017	3.79487	3.59089	3.43854	3.37224	4.08375	4.26072	4.19643	4.356	3.39125	4.01121	3.37224	3.85422	4.06512	3.81084	3.7859	4.15198	-0.012554	0.203646	0.244833	-0.016917	0.268434	0.611528	-0.544571	-0.826896	-0.156722	-0.782035	0.315733	-0.027443	-0.711511	-0.406497	-0.131304	-0.545161	0.394656	0.14077	-0.16694	0.420399	0.025418	0.236874	0.078923	0.168213
13434495	AT3G29035	6.64581	6.6998	6.63062	6.01578	6.95557	6.30352	6.9496	6.89677	6.4606	5.78874	6.06112	5.52471	3.81149	4.89082	4.84528	4.0906	4.44868	4.24966	4.7786	5.16551	4.55606	4.85642	3.67088	3.80584	-2.83433	-1.80898	-1.78535	-1.92518	-2.50689	-2.05387	0.303784	0.196965	-0.170024	-0.227043	-0.894442	-0.778815	0.96711	0.274689	-0.289217	0.765822	-0.777796	-0.443816	0.663326	0.077724	-0.119193	0.992865	0.116646	0.334999
13434510	AT3G29080	5.24622	5.65325	4.95502	5.67994	5.34953	5.7652	5.04607	5.86012	4.92281	5.3397	4.94044	5.02584	5.01557	5.4317	5.85002	5.77182	5.57059	5.66426	6.1263	4.9875	4.64248	4.59306	6.19427	5.24757	-0.230646	-0.221551	0.895002	0.09189	0.221059	-0.100939	-0.200148	0.206865	-0.032202	-0.340237	-0.409093	-0.739361	1.11073	-0.444207	-1.20754	-1.17877	0.623685	-0.416689	1.31088	-0.651072	-1.17534	-0.838528	1.03278	0.322672
13434576	AT3G29300	5.42612	6.2954	5.56719	5.78709	5.24503	6.64969	5.48788	6.37885	5.44503	5.5912	5.30142	4.97614	4.90894	5.05973	4.93896	4.93826	5.41428	5.21952	5.67888	4.95039	4.70354	5.12683	5.69392	5.1565	-0.51718	-1.23567	-0.628222	-0.848831	0.169249	-1.43016	0.061754	0.083449	-0.122158	-0.195892	0.056381	-1.67354	0.769935	-0.10934	-0.235424	0.188567	0.279638	-0.063029	0.708181	-0.192789	-0.113266	0.384459	0.223257	1.61051
13434601	AT3G29370	6.75656	6.23421	5.82948	5.19234	5.55826	4.0902	7.27334	5.81637	5.64414	4.87958	4.91244	3.20298	4.97243	4.75936	4.65715	4.09912	4.71311	3.17391	4.24421	4.73782	4.46111	3.69916	4.01576	3.04801	-1.78412	-1.47485	-1.17233	-1.09322	-0.845155	-0.916289	0.516787	-0.417838	-0.185337	-0.312762	-0.645827	-0.887221	-0.728227	-0.021532	-0.196041	-0.399961	-0.697348	-0.125907	-1.24501	0.396306	-0.010704	-0.087199	-0.051521	0.761314
13434720	AT3G30260	3.45306	3.94071	4.0388	3.87296	3.21127	3.88969	3.69172	3.66707	3.64812	3.88578	3.86976	3.94071	4.43707	3.93809	3.8393	4.1562	4.00286	3.84002	3.76214	3.67433	3.63148	4.06798	3.93773	3.49592	0.984009	-0.00262	-0.199496	0.283246	0.791593	-0.049671	0.238658	-0.27364	-0.390673	0.012827	0.658491	0.051016	-0.674935	-0.263764	-0.207821	-0.088225	-0.065135	-0.344098	-0.913593	0.009876	0.182852	-0.101052	-0.723626	-0.395114
13434831	AT3G32052	2.72995	3.06764	2.6413	3.17125	2.73263	2.68001	2.9657	2.82247	2.71059	3.38678	3.29822	2.55983	3.52713	2.93356	3.15438	3.10578	3.3641	2.94956	2.82819	3.00795	2.90201	3.50653	3.12385	3.06644	0.797174	-0.134073	0.513082	-0.065463	0.631475	0.269555	0.235748	-0.245167	0.069293	0.215538	0.565588	-0.12018	-0.698936	0.074389	-0.25237	0.400746	-0.240258	0.116883	-0.934684	0.319556	-0.321663	0.185208	-0.805846	0.237063
13434841	AT3G32120	4.93274	5.63658	4.11819	4.74655	5.87294	5.56831	4.63183	5.7182	4.96212	5.06077	4.58139	4.90625	4.58215	4.41713	4.68003	5.26337	4.26693	4.63215	5.36202	4.3735	3.97382	4.72444	5.29274	4.59732	-0.350585	-1.21945	0.561842	0.516825	-1.60602	-0.936164	-0.300901	0.08162	0.843931	0.314225	-1.29156	-0.662058	0.779869	-0.043635	-0.706207	-0.538929	1.02581	-0.034825	1.08077	-0.125255	-1.55014	-0.853154	2.31737	0.627233
13435020	AT3G42970	3.27293	3.7383	3.51233	3.10674	4.08365	3.386	3.31324	3.66422	3.54649	3.22833	3.49082	3.09732	4.13758	3.94791	3.90746	3.27552	3.58426	3.60839	3.23049	3.46158	3.9722	3.56927	3.22436	3.55014	0.864656	0.209615	0.395133	0.168775	-0.499393	0.222389	0.040308	-0.074073	0.034159	0.121583	-0.592834	-0.288685	-0.90709	-0.486329	0.064744	0.293749	-0.359897	-0.058255	-0.947398	-0.412256	0.030585	0.172166	0.232937	0.23043
13435079	AT3G43250	3.42884	3.2054	3.00127	3.1437	3.28066	3.13236	3.6533	3.56731	4.06507	4.06925	4.5433	5.6758	3.52304	3.44683	3.37365	3.80902	3.07234	3.38307	4.62455	3.46617	3.52922	5.90437	4.03973	4.52011	0.094195	0.241436	0.372387	0.665317	-0.208322	0.25071	0.224464	0.361917	1.06381	0.925553	1.26264	2.54344	1.10151	0.019336	0.155564	2.09536	0.967394	1.13704	0.877046	-0.342581	-0.908244	1.16981	-0.295248	-1.4064
13435099	AT3G43420	3.27436	3.23693	3.97721	3.23719	3.03118	3.97302	3.11102	3.42518	3.24552	4.02687	3.11432	3.28312	3.65044	3.6351	3.50272	3.11485	3.04086	3.63524	2.67872	4.00391	3.38594	3.07016	3.25648	3.28863	0.376077	0.398165	-0.474481	-0.122339	0.009677	-0.337787	-0.16334	0.18825	-0.73169	0.789679	0.083137	-0.689904	-0.971718	0.368814	-0.116781	-0.044697	0.215619	-0.346603	-0.808378	0.180564	0.614909	-0.834376	0.132482	0.343301
13435123	AT3G43540	8.88108	9.02944	9.29059	9.39423	9.60039	9.32854	9.11254	9.0059	9.12693	9.23945	9.21036	9.02128	5.92523	7.22976	5.93689	6.11133	6.88898	6.76757	6.94443	6.5169	6.39126	7.39655	7.37019	5.58319	-2.95585	-1.79968	-3.35371	-3.2829	-2.71142	-2.56097	0.231466	-0.023547	-0.163657	-0.154778	-0.390032	-0.307253	1.0192	-0.712865	0.454372	1.28522	0.481207	-1.18438	0.787737	-0.689318	0.618029	1.44	0.871239	-0.877128
13435162	AT3G43623	4.26977	4.20019	4.50305	4.20379	4.43093	4.21718	4.54786	4.21263	4.35196	4.58471	4.22828	4.25613	5.16708	4.06901	4.61158	4.34958	4.5467	4.32808	4.43998	4.62329	4.46201	4.76734	4.52162	4.51073	0.897307	-0.131174	0.108535	0.145786	0.115775	0.110898	0.27809	0.012447	-0.151086	0.38092	-0.202648	0.038955	-0.727098	0.554275	-0.149574	0.417767	-0.025085	0.182652	-1.00519	0.541828	0.001512	0.036847	0.177563	0.143697
13435237	AT3G43840	5.94232	6.14616	6.14703	5.56313	6.69021	6.10315	6.00737	6.25124	5.41024	4.61915	6.32645	5.65853	7.07912	7.23787	7.11465	6.20478	7.13093	7.17965	6.3453	7.23196	8.22669	6.63868	7.19204	6.71904	1.1368	1.09171	0.967622	0.641653	0.440723	1.0765	0.065048	0.105081	-0.736788	-0.943975	-0.363757	-0.444627	-0.733815	-0.005905	1.11204	0.433902	0.061112	-0.460613	-0.798863	-0.110986	1.84883	1.37788	0.424869	-0.015986
13435379	AT3G44300	5.92924	5.96454	4.03581	6.11891	6.14218	6.01636	5.9291	5.67986	6.33927	5.62985	6.8177	9.22009	5.12149	4.7001	4.7084	6.0529	7.25304	6.5872	5.85877	5.72508	5.44976	6.52924	5.86194	8.88231	-0.807747	-1.26444	0.672588	-0.066015	1.11086	0.570839	-0.000146	-0.284683	2.30346	-0.489062	0.675525	3.20373	0.737277	1.02498	0.741362	0.476345	-1.3911	2.2951	0.737423	1.30966	-1.5621	0.965407	-2.06663	-0.908627
13435758	AT3G45248	3.65974	4.00311	4.43611	4.16515	4.23883	4.27557	3.48738	3.9538	4.02695	4.00539	4.04851	3.64026	5.14165	4.08877	3.92995	4.39957	3.96374	3.88308	4.24152	4.08877	4.28174	3.83275	4.11597	3.85146	1.48191	0.085668	-0.506159	0.23442	-0.275088	-0.392484	-0.172364	-0.049302	-0.409157	-0.159763	-0.190314	-0.635302	-0.900131	-1e-06	0.351797	-0.566824	0.152231	-0.031618	-0.727767	0.049301	0.760954	-0.407061	0.342545	0.603684
13435789	AT3G45450	4.32219	4.59888	4.50689	4.57013	5.17188	4.73604	4.57597	4.42678	4.21115	4.3767	4.64812	4.84066	4.91948	4.23488	4.25559	4.42924	4.35363	4.3437	4.09065	4.48872	4.07042	4.06463	4.35511	4.24149	0.597287	-0.363993	-0.251293	-0.140885	-0.818246	-0.392333	0.253779	-0.172094	-0.295742	-0.193427	-0.523755	0.104627	-0.82883	0.253832	-0.185177	-0.364616	0.001474	-0.102215	-1.08261	0.425926	0.110565	-0.171189	0.525229	-0.206842
13435796	AT3G45577	3.04627	2.88608	2.83922	2.97519	2.97314	3.2982	3.03493	4.58748	2.68586	3.04803	3.15338	2.73641	2.92523	3.42377	3.02044	3.52023	3.00781	2.95545	3.59826	2.74222	2.64168	2.40204	3.67744	3.12317	-0.12104	0.537698	0.181217	0.545041	0.03467	-0.342752	-0.01133	1.7014	-0.153356	0.072843	0.18024	-0.561794	0.673031	-0.681558	-0.378754	-1.11819	0.669628	0.167715	0.684361	-2.38296	-0.225398	-1.19104	0.489388	0.729509
13436105	AT3G46420	3.1412	3.12783	3.1309	3.22996	3.08494	2.90312	3.09111	3.27888	2.85637	3.27349	3.06111	2.96739	4.29759	3.1542	3.1542	3.21232	3.59608	3.1542	3.18926	3.07585	2.90006	3.6355	2.98724	3.67488	1.15639	0.026368	0.023298	-0.01764	0.511146	0.251078	-0.050094	0.151055	-0.274528	0.043535	-0.02383	0.06427	-1.10833	-0.078345	-0.25414	0.423188	-0.608847	0.520682	-1.05823	-0.2294	0.020388	0.379653	-0.585017	0.456412
13436132	AT3G46490	7.07734	7.2431	8.06034	9.17196	8.22669	7.26021	7.18815	6.97142	7.58826	8.43978	8.22459	5.05081	7.15528	6.70543	7.29572	8.06239	7.52832	6.68723	6.35603	5.88451	7.2924	7.97007	7.43225	6.76305	0.077945	-0.537676	-0.764621	-1.10957	-0.698373	-0.572983	0.110814	-0.271679	-0.472082	-0.732181	-0.002102	-2.20941	-0.799256	-0.820916	-0.003324	-0.092316	-0.096069	0.075822	-0.91007	-0.549237	0.468758	0.639865	-0.093967	2.28523
13436225	AT3G46770	5.2441	5.96129	6.29645	6.19498	6.68102	6.87519	4.77153	6.20679	5.38015	6.39491	6.91841	7.3583	4.82697	5.58324	5.86552	6.15198	6.45768	6.11555	5.94619	5.57386	5.29218	6.56309	6.33908	5.68497	-0.417131	-0.378048	-0.430935	-0.042995	-0.223344	-0.759646	-0.472574	0.245497	-0.9163	0.199935	0.237391	0.483107	1.11921	-0.009388	-0.573334	0.411104	-0.118593	-0.430573	1.59179	-0.254885	0.342966	0.211169	-0.355984	-0.91368
13436324	AT3G47130	5.48791	6.45494	5.80586	5.67853	5.59416	6.66779	5.06816	5.29155	5.04453	5.21096	5.15877	5.66888	5.59485	4.68894	4.78753	4.25067	5.06753	5.04054	4.54138	4.2355	3.89222	4.415	5.07685	3.63655	0.106942	-1.766	-1.01832	-1.42786	-0.526638	-1.62724	-0.419743	-1.1634	-0.761322	-0.467574	-0.435398	-0.998912	-1.05347	-0.453443	-0.895306	0.16433	0.00932	-1.404	-0.633731	0.709954	-0.133984	0.631904	0.444718	-0.405083
13436333	AT3G47210	2.67317	2.59281	2.42274	2.89896	2.96674	2.83551	2.59836	2.98411	2.82274	2.40451	2.56794	2.79736	2.87181	2.92112	3.09451	3.46529	3.06472	3.27969	3.58329	2.85459	3.36503	2.68522	2.81801	3.20121	0.198641	0.328303	0.671777	0.566331	0.097987	0.444178	-0.074803	0.391293	0.400009	-0.494454	-0.398791	-0.038156	0.711478	-0.066531	0.270517	-0.780072	-0.24671	-0.078481	0.786281	-0.457824	-0.129492	-0.285618	0.152081	-0.040325
13436487	AT3G47580	5.66676	6.25881	6.33614	6.76758	6.95248	6.82995	6.11044	6.00491	6.73326	6.81293	6.95248	6.5777	7.38393	7.74627	7.95544	8.4334	8.36842	8.20768	8.10871	7.92814	7.79581	8.45626	8.35757	8.20354	1.71717	1.48747	1.6193	1.66581	1.41594	1.37773	0.443683	-0.253895	0.39712	0.045348	0	-0.252244	0.724778	0.181865	-0.15963	0.022858	-0.010843	-0.004132	0.281095	0.43576	-0.55675	-0.02249	-0.010843	0.248112
13436670	AT3G47840	5.50896	5.5173	6.27124	5.61198	5.0541	5.02707	5.0916	5.91759	5.73878	5.66355	5.04396	4.69451	5.05218	5.26231	5.92524	5.57723	5.4826	5.20487	5.74968	5.51914	5.46113	5.3828	5.11204	4.77193	-0.456784	-0.254989	-0.345999	-0.034756	0.428502	0.177801	-0.417364	0.400292	-0.532462	0.051569	-0.01014	-0.33256	0.6975	0.256828	-0.464108	-0.194428	-0.370563	-0.432942	1.11486	-0.143464	0.068354	-0.245997	-0.360423	-0.100382
13436685	AT3G47950	4.2245	4.24873	4.23531	4.37856	4.35739	4.26323	4.12995	4.39837	4.17193	4.24201	4.28974	4.7345	5.01321	4.13032	4.71602	4.02555	4.44365	4.2123	4.34491	4.2698	4.79933	4.47444	3.91793	4.29715	0.788708	-0.118408	0.48071	-0.353009	0.086261	-0.050935	-0.094551	0.14964	-0.063378	-0.136546	-0.06765	0.471269	-0.668303	0.139479	0.083312	0.448893	-0.525718	0.084848	-0.573752	-0.010161	0.14669	0.585439	-0.458068	-0.386421
13436712	AT3G48020	5.33194	5.45486	5.17544	5.20063	5.1324	6.15145	5.38113	5.66225	5.73212	5.46065	5.7183	6.88877	6.30493	6.66229	6.8714	7.04146	6.75736	7.0694	7.00092	7.27306	7.40008	6.92531	6.72667	7.71592	0.97299	1.20742	1.69595	1.84083	1.62496	0.917945	0.049189	0.207383	0.556678	0.260015	0.585895	0.737311	0.695993	0.61077	0.528688	-0.116154	-0.03069	0.646519	0.646804	0.403387	-0.02799	-0.376169	-0.616585	-0.090792
13436936	AT3G48340	3.6502	3.84669	3.96949	3.93573	4.08904	4.39105	3.36653	3.63955	3.5273	3.23267	3.4587	3.95943	3.93929	4.55616	3.70737	4.11132	3.67863	4.38159	4.69137	3.78564	3.39509	4.16888	4.12881	4.17105	0.28909	0.709464	-0.262122	0.175591	-0.410408	-0.009467	-0.283667	-0.207145	-0.442195	-0.703068	-0.630341	-0.431629	0.752075	-0.77052	-0.312276	0.057553	0.450182	-0.210535	1.03574	-0.563375	0.129919	0.760621	1.08052	0.221094
13436971	AT3G48400	4.34826	5.06627	5.06853	5.02763	3.39803	4.26535	4.01419	5.36709	4.91659	4.15555	4.21281	4.84311	5.78293	5.8199	5.72594	6.04408	5.55116	5.78742	5.02392	5.7374	5.71955	5.38306	6.1084	5.63467	1.43467	0.75363	0.657407	1.01646	2.15313	1.52206	-0.334074	0.300813	-0.151939	-0.872079	0.814789	0.577756	-0.759006	-0.0825	-0.006386	-0.661024	0.557242	-0.152741	-0.424932	-0.383313	0.145553	0.211055	-0.257547	-0.730497
13437183	AT3G48830	3.99983	4.89791	5.0585	3.88295	3.48869	4.01756	4.13541	4.91747	4.81845	4.11809	3.9189	4.15928	4.67823	4.85635	5.13538	3.48315	4.1833	4.51377	3.74982	4.70391	5.2287	4.45413	4.49477	4.41204	0.678395	-0.041564	0.076879	-0.399801	0.694612	0.496215	0.135572	0.019559	-0.240055	0.235136	0.430208	0.141726	-0.928413	-0.152433	0.093322	0.970978	0.311467	-0.101734	-1.06398	-0.171992	0.333377	0.735842	-0.118741	-0.24346
13437232	AT3G48890	8.96565	9.19115	9.10496	8.85204	8.93881	9.071	9.16903	9.28347	9.21604	8.93234	9.1731	9.56704	9.21604	9.50335	9.19636	9.01465	9.04738	9.42553	9.8455	9.94111	9.67335	9.37138	9.39595	9.74386	0.250387	0.312202	0.091395	0.162604	0.108571	0.354536	0.203373	0.092319	0.111076	0.080301	0.234289	0.496048	0.629463	0.437762	0.476987	0.356735	0.348564	0.318326	0.42609	0.345443	0.365911	0.276434	0.114275	-0.177722
13437483	AT3G49620	6.47827	5.80317	6.18425	6.28583	5.39691	4.56486	6.62877	6.58107	7.07265	6.92894	5.43082	5.97694	5.76693	4.7638	4.03122	4.49526	4.6807	3.926	6.55549	5.80557	4.86097	6.56052	4.51197	6.29215	-0.711336	-1.03936	-2.15303	-1.79057	-0.716212	-0.638857	0.150498	0.777907	0.888393	0.643111	0.033909	1.41208	0.788561	1.04177	0.829746	2.06526	-0.168734	2.36614	0.638063	0.263862	-0.058647	1.42215	-0.202643	0.954066
13437538	AT3G49780	8.17948	7.71199	8.11334	8.12821	7.83928	7.80794	8.07682	8.1137	8.92547	8.57191	8.23303	8.81694	8.42303	8.4722	9.17373	9.49621	9.08954	8.83192	9.12334	8.93276	9.45683	9.86096	9.35065	9.32869	0.243548	0.760215	1.06039	1.368	1.25026	1.02398	-0.102664	0.401709	0.812126	0.443697	0.39375	1.009	0.700305	0.460553	0.283096	0.364746	0.261109	0.496769	0.802969	0.058844	-0.52903	-0.078951	-0.132641	-0.51223
13437723	AT3G50480	11.2905	10.7349	10.8637	10.3941	10.6348	10.308	11.2887	10.9816	11.1607	10.9946	10.9464	11.191	4.4206	3.75625	3.4691	4.33031	4.16576	4.0695	3.72227	3.92919	4.60718	3.49854	3.7273	3.93817	-6.86986	-6.97865	-7.39465	-6.06378	-6.46903	-6.23847	-0.00173	0.24673	0.29696	0.60046	0.31162	0.88305	-0.698331	0.172937	1.13808	-0.831768	-0.438462	-0.131337	-0.696601	-0.073793	0.84112	-1.43223	-0.750082	-1.01439
13437868	AT3G50970	5.74751	5.86166	4.5289	5.29512	4.679	7.16765	6.15993	5.29765	4.69365	4.72445	5.31033	7.30769	5.25051	5.43632	4.77655	4.72619	4.71651	5.04828	6.05769	5.64216	4.69961	5.17587	4.81611	6.57804	-0.497008	-0.425334	0.247647	-0.568935	0.037503	-2.11937	0.412414	-0.564008	0.16475	-0.570672	0.631328	0.140037	0.807185	0.205837	-0.076937	0.449686	0.099604	1.52976	0.394771	0.769845	-0.241687	1.02036	-0.531724	1.38972
13438085	AT3G51450	6.97179	6.22025	6.07058	5.39147	6.9698	7.3987	7.13046	6.56817	7.1147	6.73007	8.93441	9.57911	7.47537	7.18875	7.45861	6.69645	7.71871	8.57922	8.19368	7.94655	8.01443	8.08408	9.29833	9.35983	0.503578	0.9685	1.38803	1.30499	0.748918	1.18051	0.158667	0.347924	1.04411	1.33861	1.96462	2.18041	0.718309	0.757803	0.555811	1.38763	1.57961	0.78061	0.559642	0.409879	-0.488303	0.04902	-0.385006	-1.3998
13438503	AT3G52310	5.34873	4.512	4.17457	4.63747	4.46032	5.00391	5.83337	4.80481	4.44413	4.43186	4.40305	4.9707	5.06667	4.04335	4.76065	4.85047	4.49548	5.37591	6.0448	4.60569	4.61705	4.6638	4.65933	5.11288	-0.282057	-0.468655	0.586084	0.212996	0.03516	0.371998	0.484641	0.292807	0.269566	-0.205612	-0.05727	-0.033214	0.978123	0.562346	-0.143597	-0.186671	0.163857	-0.263025	0.493482	0.269539	-0.413163	0.018941	0.221127	-0.229811
13438645	AT3G52748	4.77478	4.46633	3.56834	3.83952	4.56289	4.0826	4.7871	4.17118	4.15811	3.77372	4.76224	4.25322	4.4472	4.34973	4.08566	4.08766	5.24782	5.59288	5.11853	4.93929	4.15959	4.12782	5.57112	5.57646	-0.327581	-0.1166	0.517317	0.24814	0.684937	1.51028	0.012319	-0.295149	0.589767	-0.0658	0.199352	0.170612	0.671332	0.58956	0.073932	0.040159	0.323296	-0.016423	0.659013	0.884709	-0.515835	0.105959	0.123944	-0.187035
13438905	AT3G53342	9.8112	9.80318	9.98923	10.1377	9.51641	9.97333	9.49563	9.413	10.0834	10.1748	9.30404	9.74811	7.91123	9.46339	9.72901	7.72787	8.12358	9.70059	9.16928	9.249	8.34792	9.15073	9.32151	8.8697	-1.89997	-0.339798	-0.260218	-2.40981	-1.39283	-0.272741	-0.315572	-0.390181	0.094129	0.03713	-0.21237	-0.22522	1.25805	-0.214387	-1.38109	1.42287	1.19792	-0.830896	1.57362	0.175794	-1.47522	1.38574	1.4103	-0.605676
13438992	AT3G53550	2.61938	2.44755	2.63548	2.75103	2.73871	2.84041	2.61434	3.11049	2.8644	2.46024	2.84869	2.4747	2.77769	3.14357	2.81484	2.77769	3.02436	2.62273	3.7079	2.99896	3.44828	2.5379	2.70469	2.67477	0.158306	0.696022	0.179358	0.026661	0.285653	-0.217672	-0.00504	0.662941	0.228918	-0.29079	0.109974	-0.365708	0.930212	-0.144611	0.633435	-0.239791	-0.319678	0.052039	0.935252	-0.807552	0.404517	0.050999	-0.429652	0.417747
13439051	AT1G79290	2.70765	3.21525	2.83437	2.52682	2.74903	2.78864	2.27282	3.65083	2.84041	2.64175	2.45515	2.61025	3.69838	2.69813	2.86017	3.07984	2.59056	2.76133	2.91773	2.84041	3.64373	3.09156	2.62901	3.26118	0.990728	-0.517123	0.025807	0.553017	-0.158474	-0.027313	-0.43484	0.435583	0.006039	0.114933	-0.29388	-0.17839	-0.780652	0.142277	0.783557	0.011723	0.038451	0.499845	-0.345812	-0.293306	0.777518	-0.10321	0.332331	0.678235
13439815	AT3G55580	5.21778	5.68302	4.64457	4.2082	5.75272	6.23071	5.05811	4.97416	4.11693	4.21548	5.7874	5.9454	4.85139	5.00214	4.38577	4.86693	5.75802	5.23311	5.5647	5.26572	4.06673	3.69311	5.56694	4.94557	-0.366398	-0.680878	-0.258801	0.658733	0.005299	-0.997605	-0.159675	-0.708864	-0.527645	0.00728	0.03468	-0.285319	0.713312	0.263578	-0.319044	-1.17382	-0.19108	-0.287535	0.872987	0.972442	0.208601	-1.1811	-0.22576	-0.002216
13439886	AT3G55646	8.22888	7.60947	6.04732	7.13477	8.18398	6.42641	8.1304	6.96618	6.22997	6.98853	7.28123	5.49047	6.50463	6.35399	6.08426	7.05195	6.66329	6.23518	7.27926	6.30413	6.19371	7.07343	6.37533	6.03763	-1.72425	-1.25548	0.036944	-0.082822	-1.52069	-0.191233	-0.098478	-0.643285	0.182652	-0.146241	-0.902758	-0.935938	0.774629	-0.049857	0.109448	0.021478	-0.287958	-0.197551	0.873107	0.593428	-0.073204	0.167719	0.6148	0.738387
13440020	AT3G55890	6.32633	6.50474	6.30955	5.78496	6.29642	6.73191	5.98819	6.00021	5.87355	4.63991	6.38469	7.6612	5.67086	6.49873	6.19303	5.24796	6.40397	5.8827	6.31376	6.41591	5.43102	5.26927	6.21472	7.22863	-0.655472	-0.006003	-0.116512	-0.537005	0.107552	-0.849213	-0.338143	-0.504525	-0.436001	-1.14505	0.088276	0.929288	0.642902	-0.082827	-0.762019	0.021311	-0.189252	1.34594	0.981045	0.421698	-0.326018	1.16637	-0.277528	0.416649
13440111	AT3G56180	3.14034	3.41774	3.33611	3.74635	3.68201	3.72219	3.44516	3.64784	3.44203	3.10826	3.51528	3.71254	3.13107	3.62242	3.54051	4.0242	3.69109	3.35839	3.95443	3.77866	3.53806	3.25461	3.81461	3.86249	-0.00927	0.204686	0.204404	0.277856	0.009085	-0.363807	0.304818	0.2301	0.105924	-0.638087	-0.166729	-0.009657	0.823358	0.15624	-0.002456	-0.76959	0.123516	0.504102	0.51854	-0.07386	-0.10838	-0.131503	0.290245	0.513759
13441341	AT3G59450	2.70182	3.10163	2.52333	2.32846	2.81907	2.38361	2.6775	2.70965	2.46448	2.55302	2.7347	2.96353	2.74299	3.82802	3.06214	2.9886	2.95449	2.5064	3.52563	2.8077	2.61018	3.61253	2.5019	2.4918	0.041166	0.726391	0.538813	0.660142	0.135424	0.122783	-0.02432	-0.391981	-0.058843	0.224561	-0.084368	0.579916	0.782636	-1.02032	-0.45196	0.623927	-0.452595	-0.014599	0.806956	-0.628342	-0.393117	0.399366	-0.368227	-0.594515
13441498	AT3G59880	7.56169	6.7102	6.41197	6.25913	6.68931	6.6563	7.81603	6.97856	7.20309	6.81484	6.86653	7.21761	6.34659	6.0187	5.65974	6.24718	5.90293	6.46055	7.04438	6.21888	6.75257	6.67408	6.13811	6.92096	-1.21511	-0.691498	-0.752236	-0.011955	-0.786379	-0.195757	0.254338	0.268362	0.791119	0.555706	0.177219	0.561311	0.697792	0.20018	1.09283	0.426909	0.235175	0.460417	0.443454	-0.068182	0.301715	-0.128797	0.057956	-0.100894
13441572	AT3G60100	4.33777	4.93883	4.76918	4.45556	4.41423	5.22901	3.98531	4.96305	4.0001	4.26588	4.15894	4.44151	4.98695	4.43546	4.13361	4.37578	4.74033	4.41423	4.07007	4.60324	4.14944	4.10865	4.01408	4.23335	0.649179	-0.503371	-0.635561	-0.079772	0.326099	-0.814784	-0.352456	0.02422	-0.769079	-0.189677	-0.25529	-0.787508	-0.91688	0.167782	0.015826	-0.26713	-0.726253	-0.180879	-0.564424	0.143562	0.784905	-0.077453	-0.470963	0.606629
13441594	AT3G60120	3.32179	3.78805	3.4525	3.35578	3.56844	3.44012	3.23158	3.50786	2.97614	3.34456	4.04165	6.36519	3.58673	3.67203	3.57584	3.79354	3.56785	3.82836	4.28749	3.7295	3.79869	3.95705	3.65678	6.51705	0.264939	-0.116027	0.12334	0.437766	-0.000587	0.388245	-0.090208	-0.280196	-0.476359	-0.011223	0.473216	2.92507	0.700764	0.057472	0.222845	0.163502	0.088926	2.68868	0.790972	0.337668	0.699204	0.174725	-0.38429	-0.23639
13441620	AT3G60140	3.356	3.88534	3.35703	3.93581	4.82196	3.81602	3.91358	4.16301	5.42645	3.76591	5.83873	7.20652	3.91212	4.59334	4.43899	4.63828	6.51727	5.42468	4.88863	5.27494	5.78072	5.60683	4.57509	6.69757	0.556121	0.708	1.08196	0.702474	1.69531	1.60865	0.557575	0.277668	2.06943	-0.169894	1.01677	3.39049	0.976505	0.681595	1.34173	0.968553	-1.94218	1.27289	0.41893	0.403927	-0.727697	1.13845	-2.95895	-2.1176
13441813	AT3G60570	4.88423	5.16197	5.06882	5.58856	4.81926	5.18355	4.54972	5.81605	4.15304	5.02722	5.02569	5.03942	5.81041	5.28677	4.80874	5.48926	4.57424	5.24036	5.02722	5.02722	5.02722	5.11011	5.10587	5.18355	0.926187	0.124792	-0.260077	-0.099297	-0.245017	0.056806	-0.334507	0.654075	-0.915782	-0.561335	0.206429	-0.144125	-0.783192	-0.259543	0.218479	-0.379154	0.531633	-0.056806	-0.448685	-0.913618	1.13426	0.182181	0.325204	0.087319
13441887	AT3G60710	5.5988	5.47196	5.68939	4.93183	5.2641	4.91921	5.84467	5.34186	4.8106	5.63432	5.24038	5.06822	5.02119	5.00703	4.97075	4.91544	4.73824	4.52407	4.23874	4.90312	5.7334	4.54569	4.33642	4.73344	-0.577611	-0.464937	-0.718634	-0.016387	-0.525863	-0.395133	0.24587	-0.130106	-0.878784	0.70249	-0.023716	0.149014	-0.78245	-0.103907	0.762649	-0.369751	-0.401812	0.209371	-1.02832	0.026199	1.64143	-1.07224	-0.378096	0.060357
13442179	AT3G61290	4.57456	4.53064	4.56712	4.84212	4.3689	5.00851	4.12877	4.27573	3.37421	4.48693	4.3689	5.39129	4.06838	4.63547	4.74305	4.34576	4.3689	4.01718	5.00918	3.94411	3.56142	3.94763	4.36032	4.50284	-0.506187	0.104827	0.175925	-0.496358	0	-0.991328	-0.445794	-0.254915	-1.19291	-0.355196	0	0.382781	0.940804	-0.691359	-1.18162	-0.398136	-0.008584	0.48566	1.3866	-0.436444	0.011285	-0.04294	-0.008584	0.102879
13442258	AT3G61450	5.80093	4.89569	5.553	5.22113	4.88753	5.14135	5.50154	5.31992	4.87343	4.96174	5.27786	5.51527	5.35259	5.96389	5.56476	5.25096	5.21113	5.31992	6.38727	5.39373	5.42834	5.45284	5.54343	5.75981	-0.448345	1.0682	0.011765	0.029827	0.323603	0.178574	-0.299391	0.424233	-0.679573	-0.259386	0.39033	0.373922	1.03469	-0.570152	-0.136425	0.201884	0.332295	0.439895	1.33408	-0.994385	0.543148	0.46127	-0.058035	0.065973
13442465	AT3G61898	5.87267	5.82546	6.00721	5.71352	6.43705	5.85446	5.50962	5.72775	6.00967	6.53894	6.42723	5.66	4.81293	4.79562	5.28772	4.43192	5.46603	5.1559	3.91811	5.36879	4.71863	4.66725	5.29394	3.17974	-1.05974	-1.02984	-0.719487	-1.28159	-0.971023	-0.698555	-0.363045	-0.097711	0.00246	0.825421	-0.009816	-0.194461	-0.894819	0.573168	-0.569093	0.235333	-0.172084	-1.97616	-0.531774	0.670879	-0.571553	-0.590088	-0.162268	-1.7817
13442481	AT3G61950	6.49135	6.44653	6.54502	7.0047	7.18822	6.80814	6.16311	6.10694	6.33766	6.70097	6.87757	5.45657	6.1727	6.48331	6.72827	7.03862	6.72738	6.21829	5.36527	6.25432	6.39328	6.64797	6.40701	5.9669	-0.318658	0.036779	0.183251	0.033927	-0.460844	-0.589852	-0.328241	-0.339592	-0.20736	-0.303728	-0.310647	-1.35157	-0.807427	-0.22899	-0.334994	-0.390654	-0.320363	-0.251383	-0.479186	0.110602	-0.127634	-0.086926	-0.009716	1.10019
13442534	AT3G62060	7.41874	7.38518	8.06458	8.29256	7.35462	7.21401	7.35864	7.42272	7.80096	8.05851	6.72849	6.83267	8.00117	7.79037	8.37125	8.59075	7.39806	7.09113	7.20551	7.14457	8.39148	7.81915	7.15042	7.71812	0.582426	0.405186	0.306672	0.298183	0.043441	-0.122879	-0.060095	0.037543	-0.263622	-0.234049	-0.626128	-0.38134	-0.795657	-0.645796	0.020229	-0.771595	-0.247638	0.626996	-0.735562	-0.683339	0.283851	-0.537546	0.37849	1.00834
13442771	AT3G62890	5.34045	5.91101	5.88331	5.79132	5.08983	5.52806	4.87593	5.87818	5.53314	5.7187	5.48995	5.62686	5.73316	5.18391	5.16606	5.46708	4.90636	5.54711	4.98942	5.52876	5.73332	5.48276	5.08806	5.11308	0.392711	-0.727108	-0.717251	-0.324242	-0.183475	0.019048	-0.464517	-0.032837	-0.350178	-0.072617	0.400115	0.098803	-0.74374	0.34485	0.56726	0.015681	0.181699	-0.434031	-0.279223	0.377687	0.917438	0.088298	-0.218416	-0.532834
13443193	AT3G01327	2.827	2.43098	2.75486	2.71217	2.48694	2.83962	2.72533	2.48931	2.2716	2.68586	2.4436	2.43298	3.48026	3.15027	2.82828	2.50361	2.85609	2.64048	2.66742	2.74036	3.14024	3.00663	2.70953	2.52746	0.653263	0.719289	0.073417	-0.208554	0.369152	-0.199145	-0.101669	0.058338	-0.483268	-0.026305	-0.043337	-0.406643	-0.812844	-0.409909	0.311957	0.50302	-0.146566	-0.113011	-0.711175	-0.468247	0.795225	0.529325	-0.103229	0.293632
13443204	AT3G01324	3.08251	2.66546	2.80158	2.90662	3.74512	2.7035	3.40638	3.08251	2.6174	3.24884	2.89392	3.44945	3.51569	3.81588	3.08251	3.48026	2.83947	3.27242	4.32153	2.77613	2.79835	3.72871	3.67059	3.61979	0.433187	1.15042	0.280929	0.573641	-0.905651	0.568919	0.32387	0.417047	-0.184177	0.342222	-0.8512	0.745954	0.80584	-1.03975	-0.28416	0.248449	0.831115	0.347375	0.48197	-1.4568	-0.099983	-0.093773	1.68232	-0.398579
13443206	AT3G01325	2.87694	3.00685	3.11024	2.86056	2.82444	2.535	2.95222	2.92062	2.72693	2.62292	2.47438	2.70765	3.69313	3.2852	3.68913	2.78292	2.94959	2.82689	2.98175	3.35073	3.35339	3.21902	2.92062	2.89049	0.816191	0.27836	0.578889	-0.077637	0.125144	0.291892	0.075275	-0.086226	-0.383305	-0.237632	-0.35006	0.172658	-0.711382	0.065524	-0.335741	0.436107	-0.028967	0.063602	-0.786657	0.15175	0.047564	0.673739	0.321093	-0.109056
13443268	AT3G01420	3.83191	4.04699	4.3355	3.93537	3.97164	4.06073	4.10758	3.88856	4.52496	4.07732	4.54984	7.14995	4.23698	4.84627	4.33757	4.42025	5.30089	4.62818	5.09108	4.33409	4.71934	5.42514	4.39691	8.3251	0.405074	0.799277	0.002069	0.484887	1.32925	0.567445	0.275672	-0.158426	0.189463	0.141954	0.578197	3.08922	0.854098	-0.512179	0.381774	1.00489	-0.903976	3.69692	0.578426	-0.353753	0.192311	0.862932	-1.48217	0.6077
13443449	AT3G01900	3.47689	3.49869	4.04044	3.57776	3.96447	3.40732	3.71827	3.81811	3.79474	3.69689	3.871	3.51847	3.57838	4.42035	4.22676	4.04413	3.97151	4.14665	4.45669	4.22585	4.65505	4.31819	4.40415	4.12273	0.101489	0.921664	0.186321	0.46637	0.007033	0.73933	0.241379	0.319417	-0.245697	0.119128	-0.093471	0.111154	0.878305	-0.194501	0.428282	0.274054	0.432646	-0.023918	0.636926	-0.513918	0.673979	0.154926	0.526117	-0.135072
13443607	AT3G02270	3.791	3.89263	4.14216	4.4497	4.04378	3.69072	3.89188	4.74038	3.74057	4.13372	3.82867	3.54984	3.85619	4.27201	4.26005	4.11078	4.64737	3.7933	4.49002	4.32894	4.40381	3.91136	3.9853	4.25006	0.065196	0.379379	0.117893	-0.338917	0.603594	0.102579	0.100888	0.847748	-0.40159	-0.315977	-0.215108	-0.140875	0.633831	0.056929	0.143756	-0.199415	-0.662064	0.456761	0.532943	-0.790819	0.545346	0.116562	-0.446956	0.597636
13443621	AT3G02380	8.56499	7.58415	7.47198	8.28691	10.1449	9.22514	8.21665	7.33056	7.69917	8.14523	9.31883	8.24099	8.71949	7.55039	7.62429	8.00351	9.63273	9.01127	7.96987	7.66295	7.82564	8.02734	9.00094	8.34546	0.154493	-0.03376	0.152316	-0.283398	-0.512155	-0.213877	-0.348346	-0.253588	0.227191	-0.14168	-0.826051	-0.984157	-0.749618	0.112558	0.201342	0.023832	-0.63178	-0.665808	-0.401272	0.366146	-0.025849	0.165512	0.194271	0.318349
13443626	AT3G02410	6.51468	6.57875	6.38053	6.16269	6.27671	4.61589	6.95464	5.87513	5.57784	5.90694	5.16367	4.7773	6.24886	5.44648	5.33869	4.83118	5.48991	5.29479	5.31939	5.18173	5.24854	5.28229	5.46178	4.92934	-0.265815	-1.13227	-1.04184	-1.33151	-0.786801	0.678901	0.439965	-0.703619	-0.80269	-0.255747	-1.11303	0.161406	-0.929475	-0.264749	-0.09015	0.451106	-0.028132	-0.36545	-1.36944	0.43887	0.71254	0.706853	1.0849	-0.526856
13444085	AT3G03410	3.01901	3.09929	3.35655	3.30444	2.98935	3.0504	3.20522	3.32528	3.07599	2.74836	3.17786	3.19068	3.02399	3.36971	3.32029	3.12776	2.88035	3.14934	3.78543	3.61047	2.94197	3.14236	3.08888	3.34549	0.004983	0.27042	-0.03626	-0.176675	-0.109006	0.098934	0.186212	0.225992	-0.280551	-0.556079	0.188503	0.140271	0.76144	0.240768	-0.378316	0.014594	0.208532	0.196151	0.575228	0.014776	-0.097765	0.570673	0.020029	0.05588
13445324	AT3G06019	6.17342	6.11111	5.97035	5.86446	5.74094	6.70728	6.25266	6.77878	6.11253	6.28867	5.9046	6.6025	6.29504	6.05823	6.07924	5.8038	5.62573	5.90918	5.61744	5.30231	4.82238	5.4406	5.6817	5.88053	0.121615	-0.052881	0.10889	-0.060658	-0.115208	-0.798097	0.079236	0.667668	0.142182	0.424218	0.163667	-0.104773	-0.677603	-0.755917	-1.25685	-0.363201	0.055976	-0.028647	-0.756839	-1.42359	-1.39904	-0.787419	-0.107691	0.076126
13445931	AT3G07055	3.4778	4.01196	4.48581	4.43601	4.10934	4.40443	3.86727	4.18856	4.04325	4.10934	3.51478	3.6633	3.93475	3.48225	4.10934	4.64104	3.77775	4.80802	4.78488	3.75802	4.20629	4.57819	4.27493	4.17919	0.456945	-0.529708	-0.37647	0.205031	-0.331593	0.403591	0.389469	0.176597	-0.442555	-0.326673	-0.594556	-0.741127	0.850137	0.275764	0.096954	-0.062857	0.497187	-0.628827	0.460668	0.099167	0.539509	0.263816	1.09174	0.1123
13446183	AT3G07522	5.76634	4.93602	5.29796	5.76634	5.55475	5.1864	5.61226	5.66429	5.32652	5.60114	5.46799	5.39172	6.05526	6.07363	6.13416	6.31965	6.25033	5.3354	5.23049	5.89744	6.24932	5.74076	5.57931	5.69455	0.288923	1.13762	0.836204	0.553305	0.695578	0.148992	-0.154079	0.728273	0.02856	-0.165197	-0.086756	0.205312	-0.824767	-0.176189	0.115158	-0.578887	-0.671017	0.359156	-0.670688	-0.904462	0.086598	-0.41369	-0.584261	0.153844
13446511	AT3G08720	6.13965	5.91677	5.69888	6.23435	5.68298	5.71905	6.27472	6.17984	6.00568	6.34937	6.01072	6.78688	6.29807	6.14986	6.7244	7.36119	6.80501	6.61471	7.11408	6.86467	7.10359	7.6423	6.62498	7.35685	0.15842	0.233083	1.02551	1.12684	1.12203	0.89566	0.135072	0.263065	0.306798	0.115022	0.327733	1.06783	0.816011	0.714813	0.379194	0.281104	-0.180028	0.742146	0.680939	0.451748	0.072396	0.166082	-0.507761	-0.325681
13446560	AT3G08810	4.91101	4.41885	4.61509	4.61228	4.81854	4.90903	4.68448	4.7408	4.29916	4.58871	4.47401	4.47737	4.08587	4.51647	4.66954	5.00306	4.38033	4.49789	4.97177	4.43107	4.36665	4.16544	4.62729	4.68009	-0.82514	0.097623	0.054443	0.390786	-0.438215	-0.41114	-0.226529	0.321952	-0.315933	-0.023569	-0.344528	-0.431657	0.885892	-0.085408	-0.302887	-0.83762	0.246961	0.182203	1.11242	-0.40736	0.013046	-0.814051	0.591489	0.61386
13446634	AT3G08910	6.27342	6.41391	6.58132	5.7683	6.10855	6.41317	5.85233	6.46067	6.32831	5.97239	6.23032	5.90962	5.7038	5.84904	5.81592	5.84279	5.48193	5.88521	6.40242	6.33891	6.39955	5.49297	5.96714	5.95472	-0.569618	-0.564873	-0.765402	0.074493	-0.626616	-0.52796	-0.421088	0.046757	-0.253015	0.204091	0.121771	-0.503556	0.698623	0.489876	0.58363	-0.349827	0.485211	0.069507	1.11971	0.443119	0.836645	-0.553918	0.36344	0.573063
13446941	AT3G09540	8.23112	8.44663	8.42567	8.31183	8.58899	9.21401	8.18335	7.93516	7.84186	8.46029	8.86224	8.9853	7.95887	8.38421	8.03299	8.39897	8.53395	9.02209	7.25098	7.55212	7.62074	7.9018	8.38887	8.39103	-0.272247	-0.062419	-0.392676	0.087147	-0.055047	-0.191915	-0.047768	-0.511468	-0.583813	0.148465	0.273245	-0.22871	-0.70789	-0.832091	-0.412252	-0.497177	-0.145079	-0.631065	-0.660122	-0.320623	0.171561	-0.645642	-0.418324	-0.402355
13446967	AT1G76330	2.40823	2.36231	2.62295	2.94566	2.607	2.64107	2.31204	2.3849	2.51634	2.66336	2.43505	2.62011	3.40904	2.61732	3.02003	3.4108	2.56959	2.77724	2.61736	2.16196	2.8566	3.27291	2.89093	3.42592	1.0008	0.25501	0.397079	0.465147	-0.037408	0.136168	-0.096199	0.022588	-0.106612	-0.282299	-0.171945	-0.020962	-0.791683	-0.45536	-0.163431	-0.137891	0.321338	0.648689	-0.695484	-0.477948	-0.056819	0.144408	0.493283	0.669651
13447031	AT3G09750	3.45616	3.71656	3.42382	3.79805	3.47651	3.65395	3.3518	4.12416	3.74633	3.79893	3.73395	3.4843	4.41131	3.95157	3.7817	3.75617	3.73661	4.06009	3.71687	4.35249	3.71963	3.9577	3.65109	4.0832	0.955149	0.235015	0.357886	-0.041876	0.260104	0.406135	-0.104368	0.407599	0.322508	0.000882	0.257442	-0.169656	-0.694443	0.400912	-0.062075	0.201532	-0.085517	0.023115	-0.590075	-0.006687	-0.384583	0.20065	-0.342959	0.192771
13447329	AT3G10320	3.5215	4.60077	4.43041	3.97294	4.55033	5.12681	3.91569	4.77186	5.43766	3.88751	5.30245	7.55272	4.67428	5.13284	6.03605	6.11734	5.93184	5.49989	5.32111	6.07883	6.35307	5.70399	5.64328	7.7199	1.15278	0.532068	1.60564	2.1444	1.3815	0.373081	0.39419	0.171081	1.00724	-0.085431	0.752117	2.42591	0.64683	0.945988	0.317021	-0.413352	-0.288556	2.22002	0.25264	0.774907	-0.690223	-0.327921	-1.04067	-0.205897
13447446	AT3G10590	5.11929	5.13172	5.15947	5.19032	5.65079	5.31566	5.41468	5.3327	5.00432	4.99304	5.5711	5.13177	6.37683	5.56617	5.59423	5.39386	5.69744	5.73998	5.67872	5.5896	6.00499	5.27916	5.37121	5.74209	1.25754	0.434454	0.434755	0.203539	0.046653	0.424319	0.295383	0.200985	-0.15515	-0.197283	-0.07969	-0.183889	-0.698109	0.023426	0.410761	-0.114697	-0.326231	0.002117	-0.993492	-0.177559	0.565911	0.082586	-0.246541	0.186006
13447618	AT3G10890	4.11318	3.08468	4.14126	3.39865	4.37604	4.20914	4.04231	3.40057	3.72438	3.52442	4.44109	3.66309	4.13819	3.90416	3.58763	3.80657	3.83816	4.29699	3.45668	3.80657	3.89106	3.35213	3.9886	3.80657	0.025006	0.819481	-0.553635	0.407922	-0.537872	0.087853	-0.070867	0.315894	-0.416886	0.125775	0.065053	-0.546052	-0.681503	-0.09759	0.303436	-0.454444	0.150432	-0.490419	-0.610636	-0.413484	0.720322	-0.580219	0.085379	0.055633
13447731	AT3G11160	4.66823	5.12584	4.97588	4.69994	5.06834	4.60504	4.74305	5.00954	4.33428	4.39468	4.18765	4.33925	5.66701	5.77612	5.09011	5.64598	6.0202	4.93079	6.5015	5.75813	5.84881	6.05216	6.46074	5.19473	0.998778	0.650285	0.114233	0.94604	0.95187	0.32575	0.074813	-0.116294	-0.641602	-0.305265	-0.880689	-0.265791	0.834492	-0.017988	0.758696	0.406177	0.440537	0.26394	0.759679	0.098306	1.4003	0.711442	1.32123	0.529731
13447928	AT3G11660	7.41143	7.52285	7.87825	7.52725	8.23089	8.05986	7.48295	7.65901	8.31587	7.8048	8.18128	8.41046	7.04766	7.69668	8.07786	7.88312	8.31571	8.51665	7.93681	7.84101	8.1351	7.97806	8.45914	8.39785	-0.363763	0.173828	0.199608	0.355871	0.084828	0.456782	0.071528	0.136158	0.43762	0.27755	-0.049607	0.350596	0.889152	0.144329	0.057243	0.094941	0.143431	-0.118791	0.817624	0.008171	-0.380377	-0.182609	0.193038	-0.469387
13448355	AT3G12380	8.68198	8.49376	8.66953	8.56738	8.44188	8.55067	8.79651	8.735	8.92703	7.87999	8.66953	8.74114	9.03865	8.90939	8.9197	8.39156	8.71309	8.61813	8.32101	8.72684	9.04974	8.18868	8.75984	8.75648	0.356663	0.415634	0.250172	-0.175825	0.271206	0.067459	0.114527	0.24124	0.257498	-0.687393	0.227644	0.190469	-0.717636	-0.182556	0.130043	-0.202877	0.046751	0.138347	-0.832163	-0.423796	-0.127455	0.484516	-0.180893	-0.052122
13448589	AT3G12830	6.73018	6.09596	6.52444	6.65275	6.37059	6.03364	6.83745	6.59591	6.97855	6.56812	6.78882	7.12669	7.29584	7.3477	7.65845	7.30951	6.99591	7.27277	8.05578	7.68753	7.66362	7.65141	7.75307	7.64632	0.565659	1.25174	1.13401	0.656757	0.625311	1.23914	0.107262	0.499943	0.454105	-0.084636	0.418226	1.09305	0.75994	0.339829	0.005171	0.341902	0.757167	0.373551	0.652678	-0.160114	-0.448934	0.426538	0.338941	-0.7195
13448595	AT3G12840	2.73319	3.06689	2.90216	3.25276	2.74185	3.15839	2.98252	2.7254	2.78146	3.06689	3.03672	2.7846	3.75702	3.58629	3.0479	3.32419	3.06689	3.18353	3.08871	3.51287	3.42774	3.15623	2.9851	3.10378	1.02383	0.519395	0.145733	0.07143	0.325042	0.025137	0.249327	-0.341486	-0.120702	-0.185865	0.294873	-0.37379	-0.668309	-0.073415	0.379846	-0.167954	-0.081793	-0.079748	-0.917636	0.268071	0.500548	0.017911	-0.376666	0.294042
13448634	AT3G12970	4.87216	4.83765	5.18872	5.12826	5.41504	5.53609	4.84647	4.53176	4.19232	4.7472	4.82302	4.60847	4.86937	4.44234	4.45012	4.77527	4.37148	3.84921	4.01041	3.98665	4.63505	4.64218	4.88435	4.11386	-0.002784	-0.395307	-0.738595	-0.352994	-1.04356	-1.68688	-0.025687	-0.305885	-0.996392	-0.381066	-0.592012	-0.92762	-0.858961	-0.455697	0.184928	-0.133094	0.512871	0.264645	-0.833274	-0.149812	1.18132	0.247972	1.10488	1.19226
13449173	AT3G13890	4.21166	5.51654	5.15972	4.78299	4.76673	5.69009	4.35092	5.29644	4.38285	4.56462	4.63148	5.13411	5.02733	4.94365	4.74787	4.0272	5.16106	4.38183	4.13862	3.95497	4.00485	4.49578	5.04365	4.47865	0.81567	-0.572893	-0.411844	-0.755793	0.394326	-1.30827	0.139261	-0.220105	-0.776871	-0.218374	-0.135257	-0.555983	-0.888708	-0.988677	-0.743022	0.468581	-0.117412	0.096818	-1.02797	-0.768572	0.033849	0.686955	0.017845	0.652801
13449178	AT3G13910	5.93	5.29336	4.77534	5.64641	5.67749	5.37915	5.95093	5.4318	5.87971	5.52871	5.86519	6.48378	6.12873	5.74799	5.70734	6.42031	5.97092	6.08727	6.76532	6.23394	6.11516	6.40839	6.60703	6.5858	0.198724	0.454637	0.932007	0.773903	0.29343	0.708125	0.020927	0.138445	1.10438	-0.117695	0.187701	1.10463	0.636589	0.485947	0.407819	-0.011922	0.636104	0.498524	0.615662	0.347502	-0.69656	0.105773	0.448403	-0.60611
13449314	AT3G14170	6.49745	6.70072	6.78886	6.30531	7.65898	7.01145	6.77717	6.69275	6.55291	6.74605	7.13076	6.2257	6.94138	6.97014	6.45643	6.50705	6.89582	6.49079	6.10467	6.85716	7.01124	6.20153	6.35361	6.72308	0.443935	0.269426	-0.332433	0.201743	-0.763157	-0.520655	0.279722	-0.007966	-0.235949	0.440738	-0.528214	-0.78574	-0.836711	-0.112986	0.554808	-0.30552	-0.542214	0.232287	-1.11643	-0.10502	0.790757	-0.746258	-0.014	1.01803
13449371	AT3G14225	4.55411	4.54199	4.96157	4.52274	4.02147	4.51692	4.4872	5.67199	4.7316	4.07944	4.29357	4.62138	4.95145	4.73281	4.54445	4.37429	4.51857	4.4692	5.90921	5.32244	4.70863	4.74787	5.14354	4.74669	0.397343	0.19082	-0.417126	-0.148455	0.497101	-0.047724	-0.066908	1.13	-0.229973	-0.443303	0.2721	0.104459	0.95776	0.589636	0.164184	0.373586	0.624966	0.277489	1.02467	-0.540364	0.394157	0.816889	0.352866	0.17303
13449495	AT3G14520	3.11277	2.89128	3.62603	3.1959	3.26511	3.25181	3.24456	2.92327	2.95997	2.9547	2.81916	3.07518	3.42244	2.95342	2.66798	2.86553	3.08304	3.05269	2.62666	2.80928	2.8563	2.84058	2.81174	2.93329	0.309679	0.06214	-0.958045	-0.330365	-0.182073	-0.199118	0.131791	0.031998	-0.666056	-0.241197	-0.445948	-0.176628	-0.795782	-0.14414	0.188317	-0.024953	-0.271301	-0.119399	-0.927573	-0.176138	0.854373	0.216244	0.174647	0.057229
13449508	AT3G14540	4.22632	3.08213	4.0904	3.32138	3.75712	3.69516	4.18037	3.82709	4.15214	2.97761	3.2225	2.517	3.83945	3.36879	3.36956	3.31646	3.46055	3.35514	3.07057	2.97079	3.67254	3.35383	3.38367	3.29644	-0.386872	0.286661	-0.720841	-0.004917	-0.29657	-0.340014	-0.045948	0.744962	0.061734	-0.343768	-0.534621	-1.17815	-0.76888	-0.397994	0.30298	0.037367	-0.076881	-0.058705	-0.722932	-1.14296	0.241246	0.381135	0.45774	1.11945
13449666	AT3G15130	5.71783	6.30562	6.70836	6.24949	5.81007	6.18154	5.5314	6.47954	6.27406	6.20655	5.74179	6.42847	4.94234	6.76352	6.87611	6.05163	5.89797	6.42284	5.76568	6.12983	5.93592	5.88801	5.83399	5.44225	-0.775492	0.457903	0.167746	-0.197861	0.087907	0.241299	-0.186431	0.173924	-0.434304	-0.042935	-0.068277	0.246934	0.823341	-0.633687	-0.940189	-0.16362	-0.063979	-0.980594	1.00977	-0.807611	-0.505885	-0.120685	0.004298	-1.22753
13449723	AT3G15340	5.17531	5.03761	4.91605	4.52492	4.73776	5.1568	5.28866	5.44063	5.15015	4.20467	4.85496	4.75279	5.55476	5.47281	5.44772	4.58962	4.58915	4.81224	6.22462	5.72356	5.27925	4.99101	5.29162	4.97245	0.379443	0.435202	0.53167	0.0647	-0.148608	-0.344561	0.113348	0.403025	0.234102	-0.320255	0.117202	-0.404017	0.669868	0.250756	-0.168471	0.401387	0.702473	0.160209	0.55652	-0.152269	-0.402573	0.721642	0.585271	0.564226
13449910	AT3G15720	7.07191	7.32482	8.17377	8.51543	6.49277	6.95713	6.72996	7.0066	7.52035	8.19084	6.40128	6.95194	6.6143	6.31766	6.90308	7.89919	5.9371	6.071	5.90835	6.12547	7.00689	7.74474	6.43646	5.83838	-0.457601	-1.00717	-1.27068	-0.616245	-0.555666	-0.88613	-0.341951	-0.318226	-0.653421	-0.324588	-0.091491	-0.005191	-0.705956	-0.192184	0.103801	-0.154444	0.499361	-0.232621	-0.364005	0.126042	0.757222	0.170144	0.590852	-0.22743
13450397	AT3G16970	3.26791	3.14434	3.2974	3.38267	3.16116	3.24222	2.95348	4.01109	3.28242	3.4643	3.02547	3.10281	3.70027	2.95989	3.6833	3.82571	3.07815	3.18472	2.97307	3.26982	3.73789	4.15364	3.17248	3.84078	0.432361	-0.184455	0.385898	0.443036	-0.083006	-0.0575	-0.314431	0.866748	-0.014982	0.081624	-0.135689	-0.139403	-0.727204	0.309929	0.054593	0.327933	0.094332	0.656063	-0.412773	-0.556819	0.069575	0.246309	0.230021	0.795466
13450491	AT3G17280	7.08138	6.7258	7.32989	6.69746	6.77285	6.57705	6.70096	7.01627	6.70815	7.14519	6.89903	7.20314	5.88071	6.25259	5.73789	5.81416	6.02522	5.66776	4.84651	5.33853	5.27578	4.8329	6.13372	5.22629	-1.20067	-0.47321	-1.59201	-0.883298	-0.747624	-0.909294	-0.38042	0.290469	-0.621743	0.447731	0.126178	0.626087	-1.03419	-0.914055	-0.462104	-0.981261	0.108491	-0.441468	-0.653775	-1.20452	0.159639	-1.42899	-0.017687	-1.06756
13450643	AT3G17620	3.00271	3.47363	3.04627	2.5864	2.99697	3.66023	2.88928	3.61212	2.68586	3.65329	3.04627	3.66545	2.57057	2.99367	2.70098	3.0299	2.78158	3.05889	3.29776	2.88964	2.69648	3.04627	3.55086	3.75794	-0.432138	-0.479953	-0.345289	0.4435	-0.215386	-0.601341	-0.113423	0.138496	-0.360403	1.06689	0.049296	0.005215	0.727194	-0.104033	-0.004497	0.016365	0.76928	0.699052	0.840617	-0.242529	0.355906	-1.05052	0.719984	0.693837
13450808	AT3G18250	6.68356	7.13348	6.13842	6.48489	6.86345	5.84741	7.23227	7.68094	8.59385	7.09637	8.18634	8.48935	8.13624	8.13088	7.55951	7.83493	8.08161	7.76558	8.89681	9.0789	8.62836	8.3739	8.95839	8.83612	1.45268	0.997402	1.42109	1.35004	1.21816	1.91818	0.548712	0.547462	2.45543	0.611479	1.32289	2.64194	0.760578	0.948019	1.06885	0.53897	0.876782	1.07054	0.211866	0.400557	-1.38658	-0.072509	-0.446109	-1.5714
13450833	AT3G18360	5.94689	6.42709	5.60601	5.34431	5.58762	6.16196	6.0334	6.00808	5.60217	5.64266	4.99772	5.33275	6.13396	4.81963	5.00281	5.66249	5.35994	5.27289	5.24306	5.44527	4.6948	5.61069	5.54101	5.19858	0.18707	-1.60746	-0.603201	0.318185	-0.227681	-0.889071	0.086508	-0.419009	-0.003833	0.298349	-0.589906	-0.82921	-0.890899	0.625639	-0.308001	-0.051801	0.18107	-0.074316	-0.977407	1.04465	-0.304168	-0.35015	0.770976	0.754894
13451250	AT3G19270	4.76295	4.52973	4.43925	3.52109	5.64166	5.58645	4.97548	4.48145	4.29954	3.24685	5.43304	6.77015	3.32447	4.47957	3.66616	3.13499	4.77501	4.19957	4.22781	3.99249	3.68775	3.61485	4.23234	4.27971	-1.43848	-0.050155	-0.773084	-0.386107	-0.866648	-1.38688	0.212539	-0.048273	-0.139706	-0.274247	-0.208623	1.18371	0.903337	-0.487077	0.021585	0.479859	-0.542672	0.080144	0.690798	-0.438804	0.161291	0.754106	-0.334049	-1.10356
13451272	AT3G19300	6.18352	6.50228	6.4148	5.87022	6.11662	6.15364	6.35673	6.40828	6.23166	6.15644	6.52507	6.11391	6.28025	6.24695	6.52682	6.19792	6.64162	6.5997	5.58576	6.31032	6.5688	6.31709	6.30136	6.28907	0.096729	-0.255328	0.112018	0.327692	0.524998	0.446059	0.173212	-0.093991	-0.183136	0.28622	0.408455	-0.039732	-0.694496	0.063371	0.041981	0.119174	-0.340252	-0.310628	-0.867708	0.157362	0.225117	-0.167046	-0.748707	-0.270896
13451394	AT3G19610	4.25681	4.30997	4.24424	4.32602	4.32602	4.27692	4.45508	4.47438	4.32602	4.38239	4.1007	4.38557	5.06668	4.36757	4.09612	4.63279	4.28592	4.29481	4.33082	4.40122	4.7734	4.49567	4.15409	4.2089	0.809864	0.057604	-0.148123	0.306773	-0.0401	0.017881	0.198268	0.164416	0.081778	0.056375	-0.225316	0.108646	-0.735855	0.033648	0.677287	-0.137118	-0.131831	-0.085903	-0.934123	-0.130768	0.595509	-0.193493	0.093485	-0.194549
13451718	AT3G20340	3.71654	4.24147	4.90902	3.3964	4.12471	3.88457	4.292	4.89792	4.7563	3.90344	3.88235	3.84806	4.34578	4.75669	5.80972	5.33948	3.68257	3.55783	5.44542	5.34437	5.83711	4.61684	3.78146	3.91235	0.629235	0.515216	0.900695	1.94307	-0.442142	-0.326742	0.575455	0.656449	-0.15272	0.507035	-0.242363	-0.036508	1.09964	0.587682	0.02739	-0.722634	0.098888	0.354516	0.524186	-0.068767	0.18011	-1.22967	0.341251	0.391024
13452009	AT3G20993	4.11914	4.90576	5.17176	3.80172	3.10754	5.38337	4.22377	4.97534	4.139	4.93494	4.51878	5.12767	4.42264	4.02063	4.80313	3.77915	4.45359	4.18252	5.0957	3.9859	4.63665	4.23322	4.40459	4.23025	0.303494	-0.885133	-0.368634	-0.022567	1.34605	-1.20084	0.104623	0.069578	-1.03276	1.13322	1.41123	-0.255698	0.673069	-0.034726	-0.166482	0.454065	-0.048996	0.047729	0.568446	-0.104304	0.866282	-0.679156	-1.46023	0.303427
13452080	AT3G21150	5.24035	5.11454	5.10388	5.40371	6.76151	6.48844	5.37658	4.9138	5.10906	5.96948	6.40115	6.72949	5.59089	4.55989	5.37185	4.97131	6.9983	6.84658	6.5509	5.13426	4.16933	5.8292	6.72587	7.32045	0.350541	-0.554647	0.267966	-0.432397	0.236797	0.358138	0.136227	-0.200737	0.005172	0.565773	-0.360355	0.241052	0.960005	0.57437	-1.20252	0.857883	-0.272431	0.473865	0.823778	0.775107	-1.20769	0.29211	0.087924	0.232813
13452234	AT3G21410	3.12642	3.4764	3.61837	3.43513	3.51742	3.75488	3.69393	3.52903	3.29842	3.15758	3.54671	3.51742	4.13274	3.60788	3.52736	3.64511	3.55806	3.8438	3.40538	3.72134	3.79378	3.51742	3.30429	3.45788	1.00632	0.13148	-0.091009	0.209983	0.040637	0.088928	0.567505	0.052639	-0.319953	-0.277547	0.029288	-0.237451	-0.727357	0.113465	0.266421	-0.127687	-0.253767	-0.385923	-1.29486	0.060826	0.586374	0.14986	-0.283055	-0.148472
13452511	AT3G22160	5.26819	4.37771	4.80018	4.61772	4.24228	4.25472	5.14846	4.83462	5.17394	4.71137	4.66364	4.98167	5.23364	5.31565	5.55856	4.62656	5.08665	5.77414	6.06153	6.02735	5.84887	5.65327	5.75074	6.03787	-0.03455	0.937936	0.75838	0.008832	0.844365	1.51942	-0.119726	0.45691	0.373764	0.093644	0.421358	0.726947	0.827893	0.711708	0.290306	1.02671	0.664092	0.263733	0.947619	0.254798	-0.083458	0.933069	0.242734	-0.463214
13452560	AT3G22235	8.04458	7.44117	8.47011	7.5358	9.35724	9.78168	8.16118	7.56612	8.80363	8.4356	11.0614	11.1948	5.04186	6.62513	7.92861	7.22325	8.1539	7.78386	6.32224	6.66075	8.43903	7.63421	8.88202	8.10579	-3.00272	-0.816033	-0.541498	-0.312556	-1.20334	-1.99781	0.116597	0.124954	0.333521	0.899794	1.70416	1.41309	1.28039	0.03562	0.510419	0.410961	0.728122	0.32193	1.16379	-0.089334	0.176898	-0.488833	-0.976041	-1.09116
13452635	AT3G22580	3.31937	3.1465	3.19546	3.2335	2.95907	3.14746	2.81313	3.54842	3.51094	3.19655	2.90922	3.28372	3.92878	3.2564	4.64383	3.69791	4.75057	3.35716	3.16677	3.59021	3.55459	3.58478	3.69976	3.97263	0.609412	0.109908	1.44838	0.464412	1.7915	0.209699	-0.506241	0.401922	0.315483	-0.036948	-0.049856	0.136253	-0.762008	0.333806	-1.08924	-0.113131	-1.05082	0.615467	-0.255767	-0.068116	-1.40473	-0.076183	-1.00096	0.479214
13452637	AT3G22600	7.76919	7.13025	5.72856	7.1803	7.82605	8.77949	8.09333	7.65387	8.35922	8.24939	9.45223	10.5778	8.56901	8.87413	8.81089	9.38946	9.05289	9.6074	9.60949	9.73307	9.28787	9.77657	9.93632	10.6765	0.799819	1.74389	3.08233	2.20916	1.22684	0.827913	0.324138	0.523623	2.63066	1.06909	1.62617	1.79833	1.04048	0.858934	0.476985	0.387102	0.883423	1.06914	0.716345	0.335311	-2.15367	-0.681986	-0.742752	-0.729193
13453081	AT3G24065	5.79658	5.90539	5.56303	5.52231	5.43335	5.23929	5.54673	5.32099	4.80798	5.32352	4.964	4.66655	5.87719	5.61813	5.4903	6.02173	5.75844	5.42937	4.97025	4.96245	5.45962	5.13412	5.813	5.26555	0.080614	-0.287257	-0.072733	0.49942	0.32509	0.190077	-0.249846	-0.584401	-0.755046	-0.198782	-0.469352	-0.572743	-0.906941	-0.655681	-0.030674	-0.887604	0.054555	-0.163823	-0.657095	-0.07128	0.724372	-0.688822	0.523907	0.40892
13453106	AT3G24110	5.7436	6.38304	6.42348	7.66435	6.78107	6.71406	5.68901	6.47971	5.9488	7.34539	6.71967	5.73111	6.43203	6.1578	6.42487	7.36216	6.4578	6.60362	5.56082	6.4205	6.82431	7.20094	6.59159	6.3929	0.688431	-0.225244	0.001393	-0.30219	-0.323272	-0.110441	-0.054592	0.096668	-0.474679	-0.318956	-0.061393	-0.982947	-0.871212	0.262699	0.399434	-0.161218	0.133799	-0.210718	-0.81662	0.166031	0.874113	0.157738	0.195192	0.772229
13453203	AT3G24260	3.09646	3.313	3.02635	3.25709	3.52525	3.28259	2.80114	3.25873	3.02192	2.96836	2.70104	3.84271	4.00847	3.27215	4.04607	4.30501	3.35438	3.5338	3.32067	4.04223	3.92545	3.27924	2.93365	3.35982	0.912006	-0.040853	1.01971	1.04792	-0.170867	0.251217	-0.295323	-0.054272	-0.004437	-0.288723	-0.824213	0.560128	-0.687802	0.770076	-0.120617	-1.02576	-0.420728	-0.173985	-0.392479	0.824348	-0.11618	-0.73704	0.403485	-0.734113
13453217	AT3G24310	3.92728	4.73575	4.65826	4.60523	3.99277	4.51808	4.0683	4.32707	3.48336	3.93039	4.10846	4.92459	3.96637	4.86182	4.15618	4.58831	4.06588	4.3585	4.80241	3.91803	4.11691	4.09653	4.58709	4.03864	0.039092	0.126064	-0.502076	-0.016921	0.073108	-0.159581	0.141025	-0.40868	-1.1749	-0.674846	0.11569	0.40651	0.836041	-0.943788	-0.039275	-0.491778	0.521204	-0.319859	0.695016	-0.535108	1.13562	0.183068	0.405514	-0.726369
13453515	AT3G25020	9.43075	9.45309	9.55219	9.17615	9.55119	9.64421	9.47069	9.87984	9.23883	9.1077	9.90884	10.4123	5.26286	5.42706	5.12584	4.30734	5.15592	5.46289	4.56287	5.26803	4.68237	5.35219	3.59736	5.16411	-4.16789	-4.02603	-4.42635	-4.8688	-4.39528	-4.18133	0.039942	0.426757	-0.313358	-0.068449	0.357642	0.768067	-0.699989	-0.159031	-0.443467	1.04484	-1.55855	-0.298778	-0.739931	-0.585788	-0.130109	1.11329	-1.9162	-1.06685
13453701	AT3G25670	3.19917	4.39237	4.22807	5.47573	5.09186	5.7805	3.7108	4.05064	3.8495	4.89399	5.02037	4.53753	4.63713	4.71733	4.63854	4.86631	5.41655	4.78437	3.37411	4.60174	4.12373	5.10384	3.87563	4.36009	1.43797	0.324962	0.410471	-0.60942	0.324695	-0.996127	0.511631	-0.341727	-0.378574	-0.581746	-0.071486	-1.24296	-1.26302	-0.115585	-0.51481	0.237522	-1.54093	-0.424283	-1.77465	0.226142	-0.136236	0.819268	-1.46944	0.818681
13453824	AT3G26160	4.63104	4.44709	4.36067	4.63759	4.29714	4.48468	4.16585	4.28924	4.75063	4.27026	4.40547	4.51179	4.63853	4.16746	4.60169	4.00051	3.88054	4.50641	3.8714	4.4164	4.02936	4.2866	5.10306	4.38167	0.007492	-0.279626	0.241024	-0.637075	-0.416599	0.021721	-0.465196	-0.15785	0.389965	-0.367331	0.108327	0.027108	-0.767135	0.248943	-0.572332	0.286088	1.22251	-0.124735	-0.301939	0.406793	-0.962297	0.653419	1.11419	-0.151843
13453857	AT3G26250	2.91021	3.39882	3.64109	3.34958	4.01782	3.18559	2.66778	2.75611	2.77748	3.10455	3.27213	3.47382	4.56283	3.64797	4.49939	4.44458	4.1799	3.1305	3.82655	4.12429	3.48917	3.35693	3.33652	3.75821	1.65262	0.249156	0.858299	1.09501	0.162079	-0.055089	-0.242425	-0.642712	-0.863609	-0.24503	-0.745695	0.28823	-0.736285	0.476316	-1.01022	-1.08766	-0.843377	0.627712	-0.49386	1.11903	-0.146612	-0.842627	-0.097682	0.339482
13453983	AT3G26590	7.74237	7.57506	8.39091	8.90637	8.52734	8.9655	7.59207	7.09821	8.575	8.99202	8.82716	8.84269	7.2176	7.65239	7.84552	8.6811	8.5882	8.59965	7.92368	7.57686	7.99899	8.75422	8.69419	8.91768	-0.524766	0.077324	-0.545395	-0.22527	0.060867	-0.365859	-0.150296	-0.476848	0.184089	0.085651	0.299825	-0.122814	0.706077	-0.075527	0.153477	0.073126	0.105989	0.318039	0.856373	0.401321	-0.030612	-0.012525	-0.193836	0.440853
13453998	AT3G26660	3.89004	3.40315	3.8587	3.19372	3.70107	3.45486	4.25992	3.39399	3.64166	3.98843	3.12079	4.4856	3.6943	3.03093	4.37193	3.18915	4.48811	3.38549	3.04359	3.12433	4.43258	3.39901	4.3363	4.13969	-0.19574	-0.372223	0.513226	-0.004575	0.787043	-0.069371	0.369882	-0.009167	-0.21704	0.794711	-0.580279	1.03074	-0.650717	0.093399	0.060651	0.209858	-0.151813	0.754197	-1.0206	0.102566	0.277691	-0.584853	0.428466	-0.276544
13454929	AT3G28890	4.40057	4.30958	3.69037	3.65973	4.36377	4.45997	4.90361	4.42662	4.82723	4.04798	5.48544	6.11552	5.27762	4.93957	5.46937	5.84824	5.98494	5.98436	6.10681	5.87671	5.89117	5.93244	6.54197	6.43164	0.877049	0.629992	1.779	2.18851	1.62117	1.52439	0.503039	0.117044	1.13686	0.388244	1.12168	1.65556	0.829183	0.937139	0.421799	0.084196	0.557037	0.447282	0.326144	0.820095	-0.715063	-0.304048	-0.564641	-1.20828
13455120	AT3G29250	5.17562	4.88394	4.49792	4.01013	4.36644	3.99103	5.63295	4.91755	5.81019	3.09028	5.67164	6.92252	7.53246	6.91284	6.71763	5.57878	6.18832	5.98883	8.33317	7.56034	7.46533	6.2217	6.36196	8.04294	2.35685	2.02889	2.21972	1.56865	1.82188	1.9978	0.457332	0.033607	1.31227	-0.919854	1.3052	2.93149	0.800709	0.647504	0.747694	0.642921	0.173644	2.05411	0.343377	0.613897	-0.564574	1.56278	-1.13156	-0.87738
13455189	AT3G29431	2.67469	2.42093	2.56273	2.58035	2.72786	2.55933	2.85252	2.59698	2.50538	2.68512	2.62831	2.51571	3.38178	2.72139	2.82086	2.65201	2.87449	2.6593	2.72277	2.92627	3.06196	2.47797	2.59846	2.71612	0.707087	0.300461	0.258131	0.071663	0.146626	0.099965	0.177836	0.176052	-0.057349	0.104765	-0.099557	-0.043623	-0.659009	0.204878	0.241101	-0.174042	-0.276026	0.056825	-0.836845	0.028826	0.29845	-0.278807	-0.176469	0.100448
13455212	AT3G29630	2.53595	2.81498	2.62457	2.62276	2.58721	2.78208	2.46693	2.82139	2.51843	2.38829	2.36795	2.74291	2.37647	2.9369	2.50085	2.94631	2.68743	2.68708	3.01426	2.5742	2.90199	2.62579	2.64955	2.64972	-0.159487	0.121916	-0.123727	0.323548	0.100219	-0.094997	-0.06902	0.006403	-0.106149	-0.234478	-0.219257	-0.03917	0.63779	-0.362696	0.401145	-0.320524	-0.037876	-0.037358	0.70681	-0.369099	0.507294	-0.086046	0.181381	0.001812
13455227	AT3G29644	7.47128	7.06115	7.41197	6.8623	6.82482	6.73857	7.02137	7.21937	6.29882	7.23618	7.20148	6.94799	3.30106	3.65154	4.243	4.11635	4.16162	3.19432	4.00152	3.20768	4.11901	3.62687	3.62994	3.75649	-4.17021	-3.40961	-3.16897	-2.74595	-2.6632	-3.54424	-0.449908	0.15822	-1.11314	0.373878	0.37666	0.209419	0.700456	-0.443856	-0.123989	-0.489483	-0.531684	0.56217	1.15036	-0.602076	0.989155	-0.863361	-0.908344	0.352751
13455262	AT3G30160	3.68566	4.41605	3.70661	3.75011	4.45949	4.138	3.72848	4.62944	3.84475	3.85204	3.97353	4.51773	4.04455	4.19757	4.58635	3.72195	3.68853	4.23474	4.83023	4.10884	3.90516	4.48675	3.97399	3.96966	0.358893	-0.218483	0.87974	-0.028153	-0.77096	0.096741	0.042824	0.213385	0.138148	0.101937	-0.485961	0.379726	0.785678	-0.088725	-0.681186	0.764794	0.285455	-0.265078	0.742854	-0.30211	-0.819334	0.662857	0.771416	-0.644804
13455269	AT3G30200	5.53594	4.7801	5.18226	5.35455	5.29906	4.51667	5.25321	4.70352	4.6982	4.69407	4.92417	4.51399	4.47212	5.34522	4.63144	4.95495	5.49908	4.81295	5.17896	4.59499	4.86735	4.58426	4.81295	4.95748	-1.06382	0.56512	-0.550824	-0.399599	0.200024	0.29628	-0.282737	-0.076582	-0.484063	-0.660473	-0.374887	-0.002676	0.70684	-0.750233	0.235916	-0.370686	-0.686134	0.144533	0.989577	-0.673651	0.719979	0.289787	-0.311247	0.147209
13455336	AT3G30456	3.28879	3.24279	3.35435	3.8343	3.49117	3.14612	3.70994	3.13942	3.60629	3.51379	3.09307	3.57835	3.9183	3.92098	3.57583	3.78921	3.55215	3.99941	5.03965	3.66455	3.51379	3.41213	3.52898	3.32938	0.629511	0.678198	0.221479	-0.045082	0.060981	0.853295	0.421153	-0.103365	0.251938	-0.320509	-0.398105	0.432225	1.12135	-0.256431	-0.062039	-0.377082	-0.023173	-0.670034	0.700195	-0.153066	-0.313977	-0.056573	0.374932	-1.10226
13455388	AT3G30845	3.04341	2.96161	2.95808	3.09834	3.22974	3.23643	3.1994	3.61743	2.98727	3.30083	3.18748	3.56577	3.10615	3.77579	3.56389	3.1423	3.12934	3.2209	3.80465	3.3281	3.53431	2.99049	2.93138	3.33594	0.062735	0.814179	0.605804	0.043968	-0.1004	-0.015529	0.155989	0.655815	0.02919	0.202498	-0.042261	0.329345	0.698505	-0.447687	-0.029571	-0.151819	-0.19796	0.115043	0.542516	-1.1035	-0.058761	-0.354317	-0.155699	-0.214302
13455565	AT3G42475	4.03793	5.12178	5.25356	4.82862	4.438	4.49244	3.62013	4.10167	3.88431	3.5458	3.66488	3.09866	4.6644	4.34079	3.76618	3.08586	3.52006	3.80478	3.68161	3.26241	4.24618	3.47984	4.59763	3.54751	0.626471	-0.780991	-1.48738	-1.74276	-0.917934	-0.687657	-0.417798	-1.02011	-1.36925	-1.28281	-0.773113	-1.39378	-0.982787	-1.07838	0.48001	0.393982	1.07756	-0.257271	-0.564989	-0.058268	1.84926	1.67679	1.85068	1.13651
13455606	AT3G42830	2.59776	2.59451	2.61386	2.97421	3.01939	3.10271	2.5443	2.75009	2.91694	2.82029	2.80589	2.96283	3.07722	3.68989	3.25658	2.58065	3.12584	3.60469	4.35598	3.08915	2.91694	3.08363	2.92274	3.10963	0.479463	1.09537	0.642719	-0.393553	0.106458	0.501988	-0.053459	0.155573	0.303076	-0.15392	-0.213498	-0.139874	1.27875	-0.600735	-0.339643	0.502975	-0.203102	-0.495066	1.33221	-0.756308	-0.642719	0.656895	0.010396	-0.355192
13455644	AT3G42960	3.181	3.3165	3.15188	2.8575	3.19681	3.71215	3.36999	4.08025	3.14778	3.13931	3.42177	3.31722	3.20361	3.96378	3.68134	3.87522	3.41469	3.35477	3.85437	3.4126	3.33061	3.385	3.60504	3.64792	0.022607	0.647283	0.529463	1.01772	0.217878	-0.357377	0.188994	0.763755	-0.004094	0.281817	0.224965	-0.394926	0.65076	-0.551179	-0.35073	-0.490224	0.190358	0.293152	0.461766	-1.31493	-0.346636	-0.772041	-0.034607	0.688078
13455778	AT3G43432	2.98584	3.05749	2.66352	2.94485	3.0039	2.75626	2.8728	3.01096	2.90067	2.94143	2.98007	2.98252	3.91673	3.29602	3.21654	3.12976	2.97185	3.27135	3.21758	3.33677	3.08989	3.2809	2.82609	2.89052	0.930887	0.238531	0.55302	0.18491	-0.032051	0.515092	-0.113041	-0.04653	0.237153	-0.00342	-0.023834	0.226254	-0.699148	0.040746	-0.12665	0.151142	-0.145761	-0.380836	-0.586107	0.087276	-0.363803	0.154562	-0.121927	-0.60709
13455833	AT3G43722	4.6461	5.22703	4.5016	5.44277	5.28126	6.09488	4.82556	5.97116	4.14069	5.16782	4.97527	5.24608	3.32102	3.11777	3.84068	3.82688	3.19607	3.78234	4.27966	4.07812	4.71494	3.7945	3.90507	3.20483	-1.32507	-2.10927	-0.660921	-1.61589	-2.08519	-2.31254	0.179464	0.744123	-0.360918	-0.274952	-0.305986	-0.848807	0.958638	0.960345	0.874253	-0.032384	0.708995	-0.577511	0.779174	0.216222	1.23517	0.242568	1.01498	0.271296
13456124	AT3G44718	4.47855	4.63875	5.06169	4.8571	4.33674	4.58728	4.69924	4.42525	4.61032	4.6976	4.43845	4.43644	5.13028	4.39663	4.76685	4.7279	4.59779	4.83399	4.35287	5.03696	4.86542	5.06119	4.52009	4.9066	0.651731	-0.24212	-0.294845	-0.129196	0.261042	0.246713	0.220693	-0.213503	-0.45137	-0.159501	0.101703	-0.150838	-0.777408	0.640326	0.098578	0.333284	-0.077692	0.072612	-0.998101	0.853829	0.549948	0.492785	-0.179395	0.22345
13456218	AT3G45060	7.40832	6.31179	6.37686	6.20069	6.289	5.51262	7.5562	6.43882	7.17632	6.45436	6.21984	6.31494	7.80262	6.65457	6.85949	6.66676	6.45769	6.41703	7.12148	7.07404	6.98874	6.49108	6.32767	6.26445	0.394293	0.342779	0.482631	0.466066	0.168689	0.904408	0.147874	0.12703	0.79946	0.253663	-0.069157	0.802313	-0.681133	0.419466	0.129251	-0.175686	-0.130016	-0.152579	-0.829007	0.292436	-0.670209	-0.429349	-0.060859	-0.954892
13456358	AT3G45410	3.88338	3.71322	4.07451	3.17164	4.11887	3.98382	4.3159	4.34276	3.75169	4.00102	3.84551	3.59531	4.75399	4.82584	3.40761	3.65472	4.39039	3.55533	4.07941	3.60458	3.34299	4.39308	3.96059	4.32385	0.870609	1.11262	-0.666904	0.48308	0.271516	-0.428494	0.432514	0.629538	-0.322825	0.829376	-0.273362	-0.388518	-0.674581	-1.22126	-0.064622	0.73836	-0.429795	0.768516	-1.10709	-1.8508	0.258203	-0.091016	-0.156433	1.15703
13456410	AT3G45555	3.16243	3.13288	3.32922	3.01636	3.37262	2.94197	3.72196	3.12902	3.16243	3.0213	3.38149	3.03383	3.8185	3.16243	3.14613	3.20724	2.90613	3.52567	2.97527	2.92672	3.19375	3.28387	3.14321	2.98009	0.65607	0.02955	-0.183089	0.190875	-0.466492	0.583705	0.559535	-0.003853	-0.166795	0.004943	0.008871	0.091866	-0.843228	-0.235701	0.047616	0.076637	0.237078	-0.545584	-1.40276	-0.231848	0.214411	0.071694	0.228207	-0.63745
13456412	AT3G45560	3.67753	3.69102	3.96048	4.06937	4.05408	3.97812	3.99044	4.04938	3.83168	3.57487	3.59827	3.77949	4.40524	3.35021	3.85342	3.56881	3.49726	4.08022	3.70833	3.8606	3.7312	3.46511	4.27256	3.79559	0.727706	-0.340812	-0.107061	-0.500556	-0.556816	0.102097	0.31291	0.358361	-0.128794	-0.494493	-0.455808	-0.198631	-0.696913	0.510389	-0.122218	-0.103701	0.775299	-0.284632	-1.00982	0.152028	0.006576	0.390792	1.23111	-0.086001
13456501	AT3G45800	2.48353	2.8038	3.02269	3.24113	3.06628	3.47634	2.96683	2.96162	3.06628	3.03483	3.44631	3.28213	3.66701	3.46183	3.52141	3.51681	2.87651	3.18782	2.89132	3.52551	3.65248	3.02773	2.66369	2.95447	1.18348	0.658033	0.498724	0.275677	-0.189766	-0.288525	0.483305	0.157825	0.043589	-0.206303	0.380034	-0.194216	-0.775689	0.063687	0.131072	-0.489075	-0.212823	-0.23335	-1.25899	-0.094138	0.087483	-0.282772	-0.592857	-0.039134
13456625	AT3G46080	6.43567	6.00261	6.23635	5.44229	5.38661	5.46894	6.51748	5.93713	6.33955	5.42306	7.20887	8.35657	8.57172	8.02671	7.35503	7.38841	7.71631	8.15006	9.87371	8.9415	8.58191	7.86015	8.59927	9.42827	2.13605	2.0241	1.11868	1.94612	2.3297	2.68112	0.0818	-0.065482	0.103202	-0.019238	1.82226	2.88762	1.30199	0.914787	1.22688	0.471738	0.882953	1.27821	1.22019	0.980269	1.12368	0.490976	-0.939305	-1.60941
13456629	AT3G46090	6.98683	4.37401	5.15489	4.26692	4.07902	3.95024	6.64718	5.16834	5.04409	5.32537	5.64717	6.10954	7.87425	6.35379	5.73322	5.50667	6.32919	6.73627	8.51075	7.37259	5.72042	6.52775	6.94932	7.55857	0.887419	1.97978	0.578334	1.23975	2.25016	2.78602	-0.339655	0.794327	-0.1108	1.05845	1.56815	2.1593	0.636499	1.01881	-0.012803	1.02108	0.620136	0.822306	0.976154	0.22448	0.097997	-0.037364	-0.948012	-1.33699
13456810	AT3G46614	2.64917	3.18474	2.62447	2.85731	3.1231	2.48561	2.93219	2.72316	3.50675	3.03595	2.5805	2.52491	4.25067	4.1588	4.63554	4.2497	4.31777	4.67215	5.42936	5.14123	3.81534	4.05257	4.82606	4.71476	1.6015	0.974061	2.01106	1.39238	1.19468	2.18655	0.283016	-0.461576	0.882273	0.178639	-0.542596	0.039307	1.17869	0.982426	-0.8202	-0.197123	0.50829	0.04261	0.895678	1.444	-1.70247	-0.375762	1.05089	0.003303
13456813	AT3G46616	4.96094	4.63543	5.82434	4.45449	5.04602	4.55548	4.8103	4.8832	5.15343	4.62107	5.07924	5.3814	3.39124	3.06558	3.66848	3.92767	3.67844	3.30496	4.22887	3.81903	4.17565	3.48535	3.5163	3.79087	-1.5697	-1.56986	-2.15587	-0.526823	-1.36758	-1.25052	-0.150644	0.247764	-0.670914	0.166582	0.03322	0.825925	0.837631	0.753447	0.507172	-0.442321	-0.162147	0.485917	0.988275	0.505683	1.17809	-0.608903	-0.195367	-0.340008
13457141	AT3G47543	2.51067	2.64507	3.07087	2.75952	2.66524	2.47144	2.35911	2.20674	2.85095	2.34652	2.52045	2.30299	2.52045	2.46107	2.91179	2.4147	2.6712	2.6315	3.40721	2.48623	2.52045	2.31155	2.608	2.40522	0.00978	-0.183999	-0.159083	-0.344818	0.005964	0.160061	-0.151559	-0.438332	-0.219924	-0.412999	-0.144792	-0.168453	0.886766	0.025158	-0.39134	-0.103155	-0.063201	-0.226286	1.03832	0.46349	-0.171416	0.309844	0.081591	-0.057833
13457357	AT3G48090	8.81453	8.49823	8.28401	8.05621	8.67616	8.69079	8.53932	8.35627	8.28401	8.4857	9.36604	9.72623	6.79971	6.95261	7.77393	7.56505	8.38391	8.29606	8.06015	7.48042	8.12035	7.89063	8.12045	7.86335	-2.01483	-1.54562	-0.510081	-0.491157	-0.292255	-0.394727	-0.27521	-0.141961	0	0.429493	0.689881	1.03544	1.26045	0.527808	0.346416	0.325586	-0.26346	-0.432705	1.53566	0.669769	0.346416	-0.103907	-0.953341	-1.46815
13457852	AT3G49440	2.80112	2.70982	2.63027	2.70626	2.76734	2.53628	2.63646	3.23568	2.48235	2.67074	2.75171	2.70547	3.21418	2.8444	2.98323	2.83399	2.843	2.91825	2.52793	2.62774	2.75531	3.05007	2.78456	2.7819	0.413065	0.134588	0.352958	0.127734	0.075652	0.381972	-0.16466	0.525863	-0.147923	-0.035521	-0.015631	0.169194	-0.686252	-0.216664	-0.227918	0.216079	-0.058433	-0.136346	-0.521592	-0.742527	-0.079995	0.2516	-0.042802	-0.30554
13457962	AT3G49700	3.97264	3.82486	4.10306	3.61915	4.09594	4.0704	3.85695	3.33392	4.05897	3.76073	4.54813	4.15928	4.68519	4.08769	4.8614	3.97264	4.44631	3.8195	3.99175	3.66227	3.66859	4.26956	4.20541	4.05897	0.712547	0.262828	0.758342	0.353486	0.350369	-0.2509	-0.115695	-0.490945	-0.044093	0.14158	0.452182	0.088883	-0.693439	-0.425422	-1.19281	0.296922	-0.2409	0.239468	-0.577744	0.065523	-1.14872	0.155342	-0.693082	0.150585
13458003	AT3G49770	2.71394	2.99868	2.91228	3.14318	2.83438	3.2178	2.99868	3.25113	2.72212	3.0665	3.03996	2.89654	2.9107	2.6833	3.09186	3.17389	2.89195	2.94365	3.73453	3.06941	3.24738	2.73748	2.87048	2.9922	0.196762	-0.315379	0.179584	0.030706	0.057573	-0.274148	0.284745	0.252451	-0.190156	-0.076675	0.205585	-0.321254	0.823828	0.386106	0.155517	-0.436407	-0.021468	0.048545	0.539083	0.133655	0.345673	-0.359732	-0.227053	0.369799
13458148	AT3G50150	3.65418	3.38718	3.20115	3.36197	3.34939	3.37139	4.00436	3.80201	3.25638	3.30131	3.5112	3.73086	4.41195	3.64752	3.68782	3.5327	3.34821	3.42907	3.67713	3.84044	3.75965	3.82888	3.38919	3.39077	0.757777	0.260341	0.486672	0.170725	-0.001179	0.057675	0.350186	0.414828	0.055233	-0.060663	0.161808	0.359467	-0.734823	0.192915	0.071825	0.296178	0.04098	-0.038296	-1.08501	-0.221913	0.016592	0.356841	-0.120828	-0.397763
13458159	AT3G50170	3.16783	2.69203	3.12879	3.25315	2.73906	2.59454	2.87507	2.81907	2.90871	2.85703	3.31579	2.7546	3.51849	3.37503	3.19931	3.54419	2.75941	2.80324	2.7242	2.92616	3.60174	2.85513	3.08593	2.8392	0.350663	0.683003	0.070517	0.291042	0.020351	0.208705	-0.29276	0.127037	-0.22008	-0.396125	0.57673	0.160063	-0.794296	-0.448874	0.40243	-0.689063	0.326524	0.035958	-0.501536	-0.575911	0.62251	-0.292938	-0.250206	-0.124105
13458402	AT3G50720	3.88062	4.4322	4.31299	4.1007	3.97619	3.9754	3.79598	4.40249	3.81015	3.96355	3.85757	4.00437	4.69179	3.99118	3.987	3.85228	4.29244	3.73107	3.81376	4.37363	3.7016	3.91525	4.04968	4.04468	0.811166	-0.441017	-0.325997	-0.248422	0.316254	-0.244332	-0.084644	-0.029704	-0.502839	-0.137146	-0.118624	0.028976	-0.878026	0.382455	-0.285398	0.062969	-0.242768	0.31361	-0.793382	0.412159	0.217441	0.200115	-0.124144	0.284634
13458484	AT3G50850	4.34805	3.34515	3.47256	4.55983	4.11117	3.60175	4.12342	3.58276	3.54776	3.96963	4.40425	3.70647	4.11409	4.51486	4.62617	4.64073	4.24935	4.61189	4.8674	4.18026	4.20541	4.71944	4.75211	4.41755	-0.233967	1.16971	1.15361	0.080898	0.138183	1.01014	-0.22463	0.237604	0.075199	-0.590199	0.293085	0.104725	0.753318	-0.334598	-0.420758	0.078717	0.502759	-0.194339	0.977948	-0.572202	-0.495957	0.668916	0.209674	-0.299064
13458678	AT3G51380	5.98191	6.43932	6.371	6.83216	6.21937	6.48935	5.98925	6.06027	6.39121	6.57245	6.48016	5.96104	6.88555	6.19782	6.44779	7.14827	6.82076	6.76107	6.1281	6.4063	6.47032	6.74547	7.03807	7.14201	0.903646	-0.241498	0.076791	0.316112	0.601395	0.271727	0.007343	-0.37905	0.020204	-0.259707	0.260792	-0.528304	-0.757449	0.208485	0.022531	-0.402804	0.217305	0.380935	-0.764792	0.587535	0.002327	-0.143097	-0.043487	0.909239
13459067	AT3G52302	2.9782	3.25399	3.48144	2.91481	2.79109	2.98095	2.99189	2.88835	2.89003	3.32597	3.3519	3.88819	2.92415	3.09634	3.01924	3.14494	3.1116	3.1839	3.60722	3.89244	3.08251	3.06635	2.73579	3.14494	-0.054047	-0.157647	-0.462205	0.230127	0.320506	0.20295	0.013693	-0.36564	-0.591416	0.411156	0.560804	0.907241	0.683075	0.796092	0.063268	-0.078591	-0.375806	-0.038958	0.669382	1.16173	0.654684	-0.489747	-0.93661	-0.946199
13459322	AT3G53010	6.02377	5.81619	5.92372	6.34359	5.27151	5.25612	5.94932	6.04005	5.72769	6.03433	5.30952	5.1212	6.62072	6.13575	6.04932	5.50281	5.36842	5.17242	5.84915	5.53464	5.91359	5.07478	5.33615	5.08866	0.596951	0.319568	0.1256	-0.840783	0.09691	-0.083697	-0.074451	0.223868	-0.196036	-0.309258	0.038013	-0.134914	-0.771572	-0.601119	-0.135733	-0.428028	-0.032271	-0.083762	-0.697121	-0.824987	0.060303	-0.11877	-0.070284	0.051152
13459558	AT3G53640	3.4929	4.03817	4.60487	4.02155	3.40602	4.34334	3.96144	5.08759	3.67339	3.69722	3.41408	4.0747	4.39147	4.12059	4.60189	3.63443	3.95751	4.19952	3.55371	3.52762	3.77628	3.90797	4.256	3.72403	0.898565	0.082424	-0.002982	-0.387116	0.551497	-0.143827	0.468538	1.04942	-0.931483	-0.324323	0.008065	-0.268649	-0.837763	-0.592972	-0.825609	0.273543	0.298487	-0.475486	-1.3063	-1.64239	0.105874	0.597866	0.290422	-0.206837
13459836	AT3G54310	2.62284	3.62107	3.36183	2.54033	2.86301	3.13033	2.84041	3.21329	2.5111	2.69339	2.67754	2.89483	3.55732	2.84041	2.63191	2.61025	2.84041	2.7624	2.68045	2.74326	2.82782	2.83626	2.97157	3.32618	0.934482	-0.780669	-0.729916	0.069927	-0.022603	-0.367928	0.217569	-0.407785	-0.850725	0.153059	-0.185469	-0.235503	-0.876871	-0.097149	0.195902	0.226007	0.131163	0.563774	-1.09444	0.310636	1.04663	0.072948	0.316632	0.799277
13459977	AT3G54520	2.62531	2.98363	3.01043	2.75611	3.0529	3.33933	2.84316	3.13159	2.50623	2.71403	2.5194	2.90369	3.67924	3.5562	2.69234	3.15817	2.92583	2.8926	4.36762	3.94264	3.2965	2.61362	3.07018	2.86581	1.05393	0.572575	-0.318093	0.402069	-0.127071	-0.44673	0.217854	0.147961	-0.504201	-0.042078	-0.533503	-0.435632	0.688384	0.386438	0.60416	-0.544552	0.144348	-0.026789	0.47053	0.238477	1.10836	-0.502474	0.677851	0.408843
13459999	AT3G54570	3.94967	4.38722	4.21448	4.14775	4.07614	4.58808	3.87421	4.07865	3.95641	4.18943	3.94296	4.0155	4.85274	4.24537	4.02009	4.20023	4.04275	4.19038	4.16247	4.06416	4.20295	3.8431	4.45965	4.25427	0.903072	-0.141845	-0.194393	0.052478	-0.033387	-0.397701	-0.075464	-0.308566	-0.258071	0.041685	-0.133173	-0.572576	-0.69027	-0.181215	0.182859	-0.357124	0.416897	0.063891	-0.614806	0.127351	0.44093	-0.398809	0.55007	0.636467
13460056	AT3G54700	3.28417	3.06422	2.85855	3.30875	2.9611	3.5186	2.93605	3.51816	3.33611	3.27015	2.86793	3.32124	3.0684	3.83806	3.68333	4.32602	3.89977	3.98339	4.04266	3.62858	4.01306	4.11844	3.88799	3.89977	-0.215764	0.773847	0.824779	1.01726	0.938675	0.464791	-0.348119	0.453939	0.477553	-0.0386	-0.09317	-0.197354	0.974258	-0.209479	0.32973	-0.207574	-0.011789	-0.083616	1.32238	-0.663418	-0.147823	-0.168974	0.081381	0.113738
13460200	AT3G54960	8.25653	8.59989	8.38118	7.81248	7.9331	8.5818	8.29966	8.39753	8.82195	7.89171	8.74938	9.83809	8.90451	9.27106	9.39432	8.60103	9.06097	9.52028	9.55344	9.46095	9.48623	8.5195	9.44254	9.79746	0.647985	0.671169	1.01314	0.788552	1.12787	0.938481	0.043132	-0.202358	0.440771	0.079228	0.816285	1.25629	0.648923	0.189887	0.091909	-0.081534	0.381573	0.277179	0.605791	0.392245	-0.348862	-0.160762	-0.434712	-0.979108
13460484	AT3G55670	3.35759	3.6395	3.61292	3.4639	4.07129	3.35759	3.37246	3.42839	3.73173	3.01636	3.59816	3.86791	4.00391	5.47322	4.7476	6.16622	5.45617	5.25097	4.97069	5.17419	4.85251	5.35705	5.33002	5.58008	0.646325	1.83372	1.13468	2.70232	1.38488	1.89338	0.014878	-0.211111	0.118808	-0.447541	-0.473129	0.510323	0.966781	-0.299028	0.104912	-0.809164	-0.126149	0.329112	0.951903	-0.087917	-0.013896	-0.361623	0.34698	-0.181211
13460646	AT3G56100	5.00605	5.16953	5.00022	4.90811	4.9438	5.35149	4.86839	4.76535	4.69811	4.90037	5.00234	4.60559	5.96582	5.06585	5.01004	5.77865	5.28692	5.2983	5.04066	5.11056	5.44023	6.16083	5.5155	5.37882	0.959771	-0.103675	0.009819	0.870537	0.343118	-0.05319	-0.137654	-0.404178	-0.302118	-0.007741	0.05854	-0.745897	-0.925163	0.044713	0.430185	0.382184	0.228581	0.080521	-0.787509	0.448891	0.732303	0.389925	0.170041	0.826418
13460870	AT3G56710	6.48948	6.02463	6.95864	5.41205	6.19876	6.54098	6.8239	6.32469	7.46205	6.32878	7.17302	7.91999	7.33344	7.91049	8.41572	7.33448	7.71644	8.20242	8.31199	8.59402	8.37841	8.20472	8.42378	8.27568	0.843954	1.88586	1.45708	1.92242	1.51768	1.66144	0.334419	0.300066	0.503416	0.916732	0.974263	1.37902	0.978559	0.68353	-0.037308	0.870241	0.707342	0.073261	0.64414	0.383464	-0.540724	-0.046491	-0.266921	-1.30576
13460942	AT3G56890	4.44737	4.68613	5.20942	4.93023	5.34875	4.74387	4.89985	4.77316	5.00018	5.23739	5.26889	5.04549	5.18716	6.21515	5.62031	6.54097	5.95301	6.6354	6.23949	5.83636	6.17249	6.05409	6.34729	6.68692	0.739795	1.52902	0.410885	1.61074	0.604251	1.89153	0.452483	0.08703	-0.209241	0.307159	-0.079866	0.301619	1.05232	-0.378791	0.552183	-0.486879	0.394283	0.051519	0.599838	-0.465821	0.761424	-0.794038	0.474149	-0.2501
13460997	AT3G57020	6.60677	6.88208	6.04975	5.85391	8.27294	8.71856	7.03503	6.60087	6.24615	6.55013	8.32289	8.60962	7.31194	7.38235	6.63577	6.82501	8.67028	8.88216	8.03069	7.4899	6.95312	7.56997	8.80738	8.98934	0.705172	0.500272	0.58602	0.971097	0.397347	0.163599	0.428259	-0.281209	0.196399	0.696224	0.049951	-0.108937	0.718753	0.10755	0.317342	0.744964	0.137094	0.107181	0.290494	0.388759	0.120943	0.04874	0.087143	0.216118
13461100	AT3G57260	3.31632	3.20778	3.21333	3.09703	3.22192	3.29445	3.23329	2.77721	3.23969	2.90954	3.91615	6.05036	3.21114	3.97289	3.69347	4.16972	4.21702	5.2522	3.955	3.35991	3.88672	3.2609	4.30579	4.41666	-0.105179	0.765116	0.480139	1.07269	0.995097	1.95775	-0.083037	-0.43057	0.026366	-0.187494	0.694226	2.75591	0.743852	-0.612985	0.193251	-0.908826	0.088772	-0.835549	0.826889	-0.182415	0.166885	-0.721332	-0.605454	-3.59146
13461147	AT3G57370	4.01351	4.26903	4.06398	3.99008	2.84579	4.22025	3.88431	3.82047	3.72749	3.77868	3.49655	4.18267	4.22067	3.77938	4.36763	3.64566	3.92855	3.98693	3.56126	3.98876	3.01417	4.28425	4.18189	4.04002	0.207153	-0.489641	0.303648	-0.344416	1.08276	-0.233313	-0.1292	-0.448556	-0.336491	-0.211397	0.650768	-0.037573	-0.659405	0.209373	-1.35346	0.638589	0.253347	0.053088	-0.530205	0.657929	-1.01697	0.849986	-0.397421	0.090661
13461388	AT3G57958	3.05417	3.0572	3.03002	2.82153	3.23883	3.10605	3.18644	3.98793	2.87949	3.36389	3.05104	3.23883	3.9022	3.09231	3.43152	3.51238	3.34553	3.32531	3.07323	3.96278	3.34274	3.23883	3.37297	3.39665	0.848032	0.035103	0.401498	0.690853	0.106693	0.219258	0.132268	0.930723	-0.150529	0.542363	-0.187789	0.132781	-0.828971	0.870471	-0.088777	-0.273547	0.027443	0.071344	-0.961239	-0.060252	0.061752	-0.81591	0.215232	-0.061437
13461411	AT3G58060	3.32482	3.85724	3.16629	3.45945	3.40218	3.5199	3.84976	3.52274	3.47572	3.64079	4.11977	3.55746	3.22234	3.81203	3.75836	3.22385	3.45011	3.55969	4.00937	3.31433	3.78441	3.26392	3.49102	3.4239	-0.102476	-0.045202	0.592068	-0.235597	0.047931	0.039785	0.524936	-0.3345	0.309431	0.181335	0.71759	0.037558	0.787029	-0.497701	0.026045	0.040063	0.040913	-0.135788	0.262093	-0.163201	-0.283386	-0.141272	-0.676677	-0.173346
13461423	AT3G58080	4.06476	4.59829	4.27814	4.03968	4.29716	4.56909	4.54345	4.45777	3.89983	4.42655	4.18494	4.23343	3.74697	4.51204	4.19236	4.37728	4.19315	4.09261	4.53651	3.99953	4.47643	4.63335	4.08118	4.06512	-0.317786	-0.08625	-0.085781	0.337601	-0.104001	-0.476475	0.47869	-0.14052	-0.378311	0.386864	-0.11222	-0.335654	0.789533	-0.512508	0.284077	0.256066	-0.111971	-0.027492	0.310843	-0.371988	0.662388	-0.130798	0.000249	0.308162
13461458	AT3G58150	3.2097	3.0633	2.89489	3.05445	3.38647	3.40094	3.51265	3.12254	3.3926	3.07604	3.42091	2.98506	4.06752	3.99804	3.11115	3.30615	3.09278	3.337	5.01717	4.59509	4.20316	4.08604	3.12896	3.91151	0.857821	0.934741	0.216258	0.251691	-0.293687	-0.063945	0.302949	0.059239	0.497715	0.021585	0.034447	-0.415879	0.949642	0.59705	1.09201	0.779895	0.036182	0.574507	0.646693	0.537811	0.594294	0.75831	0.001735	0.990386
13461595	AT3G58430	5.04116	5.41182	5.95603	5.33373	5.95521	5.40087	4.87997	5.24287	5.14171	5.31956	5.41956	5.43544	4.22628	4.18944	4.07057	4.06537	4.20418	3.90562	3.47079	3.81031	3.62973	3.78534	3.62652	3.52651	-0.814876	-1.22239	-1.88547	-1.26835	-1.75103	-1.49524	-0.161185	-0.168953	-0.814326	-0.014165	-0.535655	0.034574	-0.755496	-0.379131	-0.440839	-0.280033	-0.577664	-0.379113	-0.594311	-0.210178	0.373487	-0.265868	-0.042009	-0.413687
13462131	AT3G59750	5.21295	5.53552	5.97499	4.72766	6.31375	5.91444	5.65072	6.02254	6.27031	5.20833	6.77165	6.12239	6.65283	6.95821	6.92382	6.55509	7.28968	6.90253	7.42626	7.11321	7.37552	6.28612	7.33404	6.96972	1.43987	1.4227	0.948828	1.82744	0.975926	0.988098	0.437765	0.487024	0.295318	0.480671	0.457899	0.207953	0.773433	0.154994	0.451696	-0.268979	0.044361	0.067187	0.335668	-0.33203	0.156378	-0.74965	-0.413538	-0.140766
13462308	AT3G60020	5.02428	5.45039	5.4672	5.18791	4.63994	5.4069	5.27064	4.77605	4.16745	3.94664	4.72062	4.53135	4.3313	3.73195	4.4215	4.96101	4.74972	4.87065	5.06555	4.44624	4.51429	4.64666	5.2205	4.3691	-0.692976	-1.71845	-1.0457	-0.226899	0.109787	-0.536249	0.246357	-0.674337	-1.29975	-1.24127	0.080683	-0.875544	0.734243	0.714294	0.092791	-0.314349	0.470774	-0.501546	0.487886	1.38863	1.39254	0.926918	0.390091	0.373998
13462510	AT3G60540	4.0299	4.31321	3.61084	3.74096	3.96494	4.19925	4.2363	4.22763	4.28197	3.61399	4.19764	6.15166	5.02015	5.19983	4.64112	4.42912	5.08016	5.91608	6.20371	5.61038	5.2901	4.44769	5.98898	5.59907	0.990251	0.886625	1.03028	0.688158	1.11522	1.71683	0.206395	-0.085577	0.671125	-0.126975	0.232695	1.95241	1.18356	0.41055	0.648975	0.018573	0.908821	-0.317012	0.977166	0.496127	-0.02215	0.145548	0.676126	-2.26942
13462634	AT3G60972	2.38333	1.93926	2.12244	2.31379	2.78517	1.98288	2.03024	1.97351	1.9915	2.06134	2.17871	1.93949	2.88845	2.46399	2.28572	2.26999	1.97257	2.14296	2.18176	2.23265	1.96087	2.21691	2.12507	2.24889	0.505119	0.524737	0.163279	-0.043799	-0.812593	0.16008	-0.353095	0.034251	-0.130944	-0.252447	-0.606459	-0.043387	-0.706695	-0.231343	-0.32485	-0.053076	0.152495	0.105929	-0.3536	-0.265594	-0.193906	0.199371	0.758954	0.149316
13462698	AT3G61090	3.58617	4.05581	4.51921	5.1184	4.40046	4.54118	4.13866	4.19582	4.28043	5.50315	5.04866	4.03433	4.04254	4.74434	5.76172	6.34578	5.90612	4.19662	4.81481	4.38527	4.38798	6.05477	5.17485	4.31744	0.456368	0.688528	1.24251	1.22738	1.50566	-0.344556	0.552489	0.140002	-0.238782	0.384757	0.648196	-0.506846	0.772272	-0.359074	-1.37374	-0.291005	-0.731269	0.120823	0.219783	-0.499076	-1.13495	-0.675762	-1.37946	0.627669
13462756	AT3G61198	4.56154	4.09861	3.5427	3.8553	4.25446	3.51425	4.4554	4.25847	5.13686	4.01684	4.70965	5.63032	5.93544	6.09267	7.72152	8.38871	7.7239	7.16001	6.67684	6.59929	7.47824	8.16823	8.17601	7.33552	1.3739	1.99406	4.17882	4.53341	3.46944	3.64576	-0.106138	0.159854	1.59416	0.161542	0.455191	2.11607	0.741393	0.506617	-0.243279	-0.220474	0.452109	0.175508	0.847531	0.346763	-1.83744	-0.382016	-0.003082	-1.94056
13462806	AT3G61389	3.24642	3.03899	3.83693	2.66904	2.95876	3.02463	3.12219	3.06923	2.7271	2.84433	3.06726	3.15741	3.64687	3.21812	2.80184	3.36304	3.10682	3.27087	2.87284	3.52111	3.06529	3.1538	3.17344	2.96191	0.400449	0.17913	-1.03508	0.694001	0.148062	0.246239	-0.124225	0.030238	-1.10982	0.175299	0.108508	0.132781	-0.774024	0.302989	0.263442	-0.20924	0.066625	-0.308955	-0.649799	0.272751	1.37326	-0.384539	-0.041883	-0.441736
13462933	AT3G61730	4.6326	5.38465	5.92324	5.29314	5.02426	5.99412	5.01979	5.8177	4.79187	5.10138	5.00346	5.5478	4.23081	5.47391	5.57229	4.4053	5.64714	5.16404	5.00615	5.41331	5.00742	4.41011	4.82606	5.56654	-0.401789	0.089268	-0.350954	-0.887835	0.622883	-0.830083	0.387192	0.43305	-1.13137	-0.191763	-0.020795	-0.446318	0.775342	-0.060606	-0.564867	0.004807	-0.821074	0.402499	0.38815	-0.493656	0.566504	0.19657	-0.800279	0.848817
13463317	AT3G62460	6.39115	6.4298	7.01314	7.18162	6.10042	6.48364	5.98457	6.60363	6.68315	6.72272	6.7619	6.70041	4.60935	3.46069	3.2345	4.19252	3.93287	4.09362	3.18926	3.699	3.48865	3.6914	4.01249	3.66515	-1.78179	-2.96911	-3.77863	-2.9891	-2.16755	-2.39003	-0.406578	0.173825	-0.329983	-0.458896	0.661481	0.216772	-1.4201	0.238306	0.254147	-0.501119	0.079618	-0.428463	-1.01352	0.064481	0.58413	-0.042223	-0.581863	-0.645235
13464024	AT4G00580	4.31991	4.23771	3.76534	3.37844	3.83269	3.79133	4.37717	4.08129	3.75134	4.41961	3.49377	4.40909	4.43998	4.246	4.16976	3.70792	4.11161	3.79636	3.71104	3.79916	3.85649	4.09507	4.74824	4.51999	0.120075	0.008294	0.404415	0.329479	0.278923	0.005026	0.057265	-0.156415	-0.013998	1.04117	-0.338912	0.617761	-0.728944	-0.44684	-0.313266	0.387152	0.63663	0.72363	-0.786209	-0.290425	-0.299268	-0.65402	0.975542	0.105869
13464230	AT4G01023	5.83521	5.34212	5.29264	5.19261	5.0162	5.90219	5.62211	6.1517	5.38638	5.22342	5.24402	5.70364	4.53695	5.20606	5.18378	5.55496	4.93649	5.28016	5.28592	5.26212	5.17612	5.29479	5.29854	5.15217	-1.29827	-0.136056	-0.108852	0.362352	-0.079704	-0.622039	-0.213106	0.809588	0.093743	0.030814	0.227821	-0.19855	0.74897	0.056061	-0.007659	-0.260171	0.362045	-0.127991	0.962076	-0.753527	-0.101402	-0.290985	0.134224	0.070559
13464301	AT4G01270	4.6926	5.30643	5.61428	4.43326	5.31598	5.30145	5.22776	5.12743	5.54232	4.35597	5.30305	4.9395	4.89879	5.43168	5.55931	4.93651	5.17611	5.43016	5.65945	5.2583	6.06725	5.10687	5.81061	5.84658	0.206196	0.125241	-0.054963	0.503253	-0.139875	0.128705	0.535156	-0.179002	-0.071957	-0.077291	-0.012932	-0.361959	0.760656	-0.173381	0.507932	0.170358	0.634505	0.416421	0.2255	0.005621	0.579889	0.247649	0.647437	0.77838
13464819	AT4G02250	3.99527	4.13721	3.98836	4.46184	3.97836	3.91704	4.292	4.04532	4.21955	4.25648	4.13932	4.2555	5.14348	4.31574	4.62047	4.32602	4.32812	4.16718	4.46918	4.292	4.93578	4.36442	4.36638	4.65853	1.1482	0.178524	0.632108	-0.135819	0.349758	0.250137	0.296724	-0.09189	0.231188	-0.20536	0.160958	0.338459	-0.674293	-0.023736	0.31531	0.038402	0.038258	0.491357	-0.971017	0.068154	0.084122	0.243762	-0.1227	0.152898
13464944	AT4G02482	6.08134	6.19853	6.86926	6.41573	6.7604	6.45404	6.60181	6.02776	6.56312	6.71596	6.42695	6.55148	7.11903	6.65663	6.52058	6.73993	6.48608	6.38061	6.3464	6.58491	6.77254	6.14084	6.46429	6.39847	1.03769	0.458099	-0.348676	0.324203	-0.274321	-0.073433	0.520475	-0.170769	-0.306139	0.300231	-0.333455	0.097433	-0.772628	-0.071718	0.25196	-0.599089	-0.021796	0.017864	-1.2931	0.099051	0.558099	-0.89932	0.311659	-0.079569
13464947	AT4G02485	7.1317	7.05196	7.39513	7.38997	7.03701	7.158	7.19559	7.03414	7.28186	7.40759	7.19017	7.14837	7.94387	7.72144	7.60105	7.18516	7.46773	7.74955	7.24456	7.77081	7.54543	7.63528	7.47141	7.34034	0.812167	0.669488	0.205922	-0.20481	0.430717	0.591546	0.06389	-0.017817	-0.11327	0.017621	0.153161	-0.009626	-0.699309	0.049369	-0.055623	0.450126	0.003683	-0.409203	-0.763199	0.067186	0.057647	0.432505	-0.149478	-0.399577
13465045	AT4G02650	3.80805	4.22552	4.18858	3.76183	3.69293	4.38328	3.64519	4.17734	4.15376	3.80582	3.95964	3.86769	3.66629	4.46431	4.22881	4.01331	3.5816	3.86831	4.30737	4.10223	3.99298	3.54767	4.15281	4.22519	-0.141762	0.238794	0.040231	0.251479	-0.111333	-0.514965	-0.16286	-0.048181	-0.034825	0.043997	0.266713	-0.515586	0.641082	-0.362078	-0.235832	-0.465634	0.571214	0.356881	0.803942	-0.313897	-0.201007	-0.509631	0.304501	0.872467
13465209	AT4G03070	5.0751	6.39982	6.92439	6.35104	7.06324	7.21352	4.87668	6.00699	6.39494	6.24236	6.7718	6.77582	5.56821	6.84131	6.81175	6.20909	7.00135	6.90117	4.74051	6.20269	6.54443	6.26874	6.72215	6.66224	0.493101	0.44149	-0.112649	-0.141948	-0.061888	-0.312354	-0.198427	-0.392824	-0.529451	-0.108679	-0.291445	-0.437704	-0.827696	-0.638622	-0.267312	0.059641	-0.279204	-0.238933	-0.629269	-0.245798	0.262139	0.16832	0.012241	0.198771
13465289	AT4G03220	2.56239	3.13861	2.85835	2.84702	2.80417	2.58192	2.67977	3.08447	2.65697	2.87645	2.93034	2.70765	3.33611	3.15542	3.5163	2.84199	2.85835	2.81727	2.63437	2.83048	2.86214	3.1208	2.79619	3.08492	0.77372	0.016807	0.657954	-0.005037	0.054178	0.235357	0.117381	-0.054139	-0.201385	0.029425	0.126167	0.125739	-0.70174	-0.324942	-0.654165	0.278819	-0.062162	0.267646	-0.819121	-0.270803	-0.45278	0.249394	-0.188329	0.141907
13465856	AT4G04960	7.85135	7.8284	7.47376	6.91544	7.06492	6.70894	7.86357	7.60625	7.84161	7.35057	6.87727	6.78097	8.47268	8.45772	8.41852	7.92358	7.79029	7.49353	9.10897	8.68295	7.99577	7.95757	7.78722	7.61119	0.621337	0.629318	0.944756	1.00814	0.725369	0.784594	0.012227	-0.222152	0.367844	0.435132	-0.187651	0.072031	0.636289	0.225231	-0.422747	0.033992	-0.003066	0.117655	0.624062	0.447383	-0.790591	-0.40114	0.184585	0.045624
13465869	AT4G04990	3.39766	3.32541	3.08569	3.3575	3.3977	2.93494	3.18328	3.12149	3.47475	3.46428	3.23887	3.5205	3.21433	3.53005	3.69604	3.76034	3.67372	3.54193	3.84806	3.90239	3.83836	3.74901	3.54241	3.80101	-0.183323	0.204641	0.61035	0.402843	0.276018	0.606986	-0.214382	-0.203921	0.38906	0.106776	-0.158829	0.585552	0.633727	0.372331	0.142325	-0.011331	-0.131308	0.259077	0.848109	0.576252	-0.246735	-0.118107	0.027521	-0.326475
13465885	AT4G05020	6.79471	6.75331	6.27249	6.91086	7.40317	8.21943	7.0348	7.33922	6.96079	7.29618	8.08963	8.88717	7.03754	7.35684	7.38243	7.2745	7.85586	8.35326	8.2118	7.94691	7.27987	8.03166	7.89207	8.97434	0.242829	0.603524	1.10994	0.36364	0.452695	0.133824	0.240084	0.585904	0.688297	0.385325	0.686459	0.667735	1.17426	0.590073	-0.102555	0.757163	0.036203	0.621085	0.934175	0.004169	-0.790852	0.371838	-0.650256	-0.04665
13466084	AT4G05553	4.4044	5.19383	4.39983	4.5046	4.58953	5.22157	4.74305	5.2532	4.67726	4.3304	4.15466	4.66668	5.44327	4.12945	4.90322	5.20051	4.79559	5.05173	4.47773	4.72627	4.24078	4.94664	4.52961	4.90686	1.03888	-1.06438	0.503392	0.695909	0.206063	-0.169841	0.338649	0.059375	0.277428	-0.174205	-0.434867	-0.554885	-0.965541	0.596816	-0.662441	-0.253875	-0.265983	-0.144862	-1.30419	0.537441	-0.939869	-0.07967	0.168884	0.410023
13466115	AT4G06490	4.23714	4.01218	3.60382	4.4376	3.61097	3.90918	4.17204	4.09269	3.85716	3.98416	3.90233	4.18948	4.31453	4.16979	4.3884	4.80541	4.39687	4.25469	5.10606	4.17849	4.71248	5.02244	4.53222	4.23719	0.077397	0.1576	0.784571	0.367817	0.785898	0.345508	-0.065091	0.080509	0.253333	-0.453437	0.291354	0.280291	0.791531	0.008708	0.324088	0.217026	0.135347	-0.017508	0.856622	-0.071801	0.070755	0.670463	-0.156007	-0.297799
13466121	AT4G06583	4.09876	3.64283	3.87093	3.5551	3.6981	3.324	3.7433	3.64348	3.56563	3.6981	3.70514	3.6981	3.67458	3.86212	3.58525	3.83479	3.70233	3.52069	4.32031	3.8992	3.65417	4.0522	4.11252	3.6981	-0.424172	0.21929	-0.285684	0.279696	0.004232	0.196691	-0.355458	0.00065	-0.305303	0.143006	0.007035	0.374099	0.645729	0.037077	0.068924	0.217408	0.410181	0.177408	1.00119	0.036427	0.374227	0.074402	0.403146	-0.196691
13466148	AT4G06688	4.26242	4.63103	4.23086	4.68124	4.48773	4.27405	4.56001	4.79832	4.43344	4.76426	4.90826	4.49544	4.33539	4.5764	4.92944	4.93219	4.3898	4.6765	5.03572	5.16191	4.69057	5.25585	4.93729	5.09406	0.072975	-0.054634	0.698578	0.250954	-0.097931	0.402447	0.297591	0.16729	0.202581	0.083017	0.42053	0.221384	0.700332	0.585509	-0.238865	0.323661	0.54749	0.417561	0.402741	0.418219	-0.441446	0.240644	0.12696	0.196177
13466271	AT4G08270	3.24567	3.1903	3.38938	3.17695	3.40913	3.56506	3.03245	3.05669	3.70993	3.62575	3.53815	3.4531	3.90927	3.10616	3.28998	3.59665	3.51159	2.88591	2.91904	3.54806	3.63799	3.29181	3.35959	3.44495	0.663597	-0.084133	-0.099403	0.419705	0.102462	-0.679151	-0.213223	-0.133601	0.320551	0.448806	0.129018	-0.111954	-0.990231	0.441901	0.348013	-0.304842	-0.152005	0.559048	-0.777008	0.575502	0.027462	-0.753648	-0.281023	0.671002
13466425	AT4G08620	3.93257	4.18828	4.09151	3.96897	4.0377	3.86067	3.7274	4.22563	3.83752	3.93571	4.00183	3.79112	4.7499	4.33375	4.15496	4.15069	4.21817	4.00116	3.89796	3.70812	4.27976	4.31958	4.3008	4.08572	0.817328	0.145463	0.063456	0.181716	0.180463	0.140483	-0.205176	0.037349	-0.253986	-0.033265	-0.035873	-0.069558	-0.851941	-0.625628	0.124796	0.168891	0.082631	0.084565	-0.646765	-0.662977	0.378782	0.202156	0.118504	0.154123
13466476	AT4G08867	3.80337	3.00789	3.087	3.40063	3.61344	3.08659	3.44424	3.39601	2.80789	2.95937	3.2067	3.01199	3.19297	3.5982	3.29084	3.42463	3.43391	3.19092	3.92276	3.32648	3.30544	3.44424	4.5648	3.29084	-0.610401	0.5903	0.203838	0.024004	-0.179531	0.104333	-0.359128	0.38812	-0.279117	-0.441256	-0.406737	-0.074597	0.729793	-0.271712	0.014595	0.019611	1.13089	0.099921	1.08892	-0.659832	0.293712	0.460867	1.53762	0.174518
13466487	AT4G08895	3.98193	3.71131	3.43102	3.6861	3.1718	3.54207	3.59578	3.58912	3.37711	3.01789	4.24539	3.85398	3.48985	3.97204	4.17218	3.14792	3.33919	3.74362	4.12081	3.26392	3.68953	3.06	3.12931	3.54022	-0.492075	0.260734	0.741157	-0.538175	0.167389	0.20155	-0.386145	-0.122185	-0.053914	-0.668213	1.07359	0.311911	0.630954	-0.708123	-0.482643	-0.087921	-0.209874	-0.203395	1.0171	-0.585938	-0.428729	0.580292	-1.28347	-0.515306
13466930	AT4G10040	9.07168	9.22626	9.11793	8.67137	9.59415	9.78406	9.23702	9.23346	9.30648	8.57279	9.8149	10.339	9.08394	9.4511	9.47542	9.21877	9.61375	10.0015	9.87097	9.86447	9.74205	9.50511	10.0311	10.55	0.012262	0.224844	0.357486	0.547396	0.0196	0.217453	0.165335	0.007203	0.18854	-0.098586	0.220748	0.554903	0.787022	0.413368	0.266631	0.286341	0.41739	0.54852	0.621687	0.406165	0.078091	0.384927	0.196642	-0.006383
13467078	ATH-MIR83	3.32314	4.32979	3.41339	3.45226	3.93019	3.55343	3.59353	4.44378	3.15069	3.60642	3.41746	3.77337	5.09512	4.86282	4.20013	4.36396	3.31847	4.54501	4.3896	4.02357	3.76269	3.97336	4.24873	4.69006	1.77198	0.533031	0.786741	0.911697	-0.611719	0.991585	0.270392	0.11399	-0.262699	0.154154	-0.512735	0.21994	-0.705518	-0.839249	-0.437441	-0.390597	0.930254	0.145047	-0.97591	-0.953239	-0.174742	-0.544751	1.44299	-0.074893
13467148	AT4G10603	3.71315	3.51757	3.34001	3.57588	3.3567	3.27483	3.95179	3.4759	3.53646	3.50714	3.44448	3.26693	4.14772	3.96604	3.58919	3.80533	3.61691	3.46031	3.2231	3.94611	3.49442	3.22324	3.28725	3.24735	0.434576	0.44847	0.249179	0.229457	0.260216	0.185481	0.238641	-0.041667	0.196444	-0.068739	0.087782	-0.007893	-0.92462	-0.01993	-0.094774	-0.582098	-0.329659	-0.21296	-1.16326	0.021737	-0.291218	-0.513359	-0.417441	-0.205067
13467354	AT4G11211	6.51898	6.87998	7.21981	7.33119	7.36339	7.19087	6.80865	6.68349	6.73101	6.94187	7.30853	6.18271	6.08748	6.36228	5.76207	6.6448	7.05876	6.78705	5.40273	5.96209	6.49532	6.59363	6.92643	6.23416	-0.431498	-0.517704	-1.45774	-0.686393	-0.304626	-0.403818	0.28967	-0.196491	-0.488801	-0.389314	-0.054859	-1.00816	-0.68475	-0.400186	0.73325	-0.051166	-0.132337	-0.552885	-0.97442	-0.203695	1.22205	0.338148	-0.077478	0.455278
13467364	AT4G11250	3.42412	3.86996	4.17676	2.51855	3.62872	3.25969	3.48516	3.75251	2.89018	3.35936	2.83918	3.20298	2.37817	2.88678	3.46823	3.01035	3.39367	2.83868	3.786	2.5086	2.79702	2.57743	3.30284	2.83103	-1.04595	-0.983178	-0.708525	0.491801	-0.235054	-0.421007	0.061036	-0.117451	-1.28658	0.840808	-0.789541	-0.056709	1.40783	-0.378178	-0.671214	-0.432921	-0.090827	-0.007652	1.3468	-0.260727	0.615365	-1.27373	0.698714	0.049057
13467377	AT4G11280	6.38378	5.9407	6.70582	6.43833	6.35622	6.27792	6.58164	6.11343	6.21842	7.25026	6.5966	6.75104	6.70262	6.47353	6.44277	6.45714	6.63725	6.86771	7.82493	6.79792	6.28368	7.39871	6.75731	7.30026	0.318839	0.532827	-0.263053	0.018805	0.281031	0.589781	0.197857	0.172731	-0.487407	0.811926	0.240383	0.473117	1.12231	0.324387	-0.159093	0.94157	0.120058	0.432559	0.92445	0.151656	0.328314	0.129644	-0.120325	-0.040558
13467383	AT4G11290	7.70705	7.02101	6.41634	6.73202	7.02661	6.43746	7.39321	7.1683	7.0085	6.67101	7.48653	6.76907	6.58555	6.3713	5.52093	6.63262	7.09607	6.19409	5.83959	6.44761	5.87392	6.3617	6.66772	5.83278	-1.1215	-0.649715	-0.895414	-0.0994	0.069456	-0.243373	-0.313847	0.14729	0.592163	-0.061003	0.459913	0.331613	-0.745961	0.076313	0.35299	-0.270918	-0.428353	-0.361311	-0.432114	-0.070977	-0.239173	-0.209915	-0.888266	-0.692924
13467485	AT4G11480	3.4825	2.84263	2.79862	3.18276	3.2589	3.32972	3.08473	3.23653	3.53952	3.24115	3.12767	3.45043	3.12685	2.50725	3.45516	2.90717	2.89522	3.20683	3.78741	2.91289	2.95507	2.77361	3.27657	3.05318	-0.355654	-0.335384	0.656537	-0.27559	-0.363686	-0.122894	-0.397771	0.393903	0.740898	0.058382	-0.131233	0.12071	0.660564	0.405645	-0.500089	-0.133564	0.381355	-0.153647	1.05834	0.011742	-1.24099	-0.191946	0.512588	-0.274357
13467535	AT4G11655	3.50542	2.96932	3.35613	3.49731	3.31864	3.34338	3.56659	3.5152	3.449	3.27537	3.98404	4.82742	4.83252	4.60817	4.37527	4.2718	4.24228	4.75447	5.669	5.67208	4.77436	4.41105	5.13643	5.82777	1.3271	1.63884	1.01914	0.774497	0.923641	1.41109	0.061169	0.545874	0.09287	-0.221935	0.665399	1.48404	0.836481	1.06391	0.399094	0.139243	0.894147	1.07329	0.775312	0.518034	0.306224	0.361178	0.228748	-0.410745
13467680	AT4G12005	5.5437	4.70097	4.93115	6.23006	6.69226	6.66692	5.16423	4.18049	4.69901	6.18377	6.4518	6.48818	6.38157	6.31202	6.07928	7.01001	6.61748	6.07402	5.69421	5.64373	6.52742	6.50317	6.37021	6.38157	0.837867	1.61105	1.14813	0.77995	-0.074779	-0.592898	-0.379471	-0.520475	-0.232136	-0.04629	-0.240455	-0.178739	-0.687361	-0.668283	0.448141	-0.506842	-0.247263	0.307547	-0.30789	-0.147808	0.680277	-0.460552	-0.006808	0.486286
13467684	AT4G12020	8.43332	8.53889	8.28163	8.75953	8.85667	8.79859	8.61588	8.70243	8.49413	8.53934	8.87783	9.02864	5.02364	4.54622	3.6988	5.00467	4.08189	4.2336	3.93763	4.70675	4.41229	4.07981	3.77984	5.02533	-3.40968	-3.99267	-4.58283	-3.75485	-4.77478	-4.56499	0.182554	0.163549	0.212501	-0.220187	0.021157	0.230056	-1.08602	0.160529	0.713497	-0.92486	-0.302046	0.791723	-1.26857	-0.00302	0.500996	-0.704673	-0.323203	0.561667
13467928	AT4G12830	7.84874	8.14917	9.22636	9.16935	9.31187	9.52084	7.71372	7.66833	9.19145	9.30991	8.91592	8.74152	8.34153	8.12862	9.3104	9.42635	9.34727	9.32062	7.57166	7.64394	9.15513	9.21695	8.84246	9.08658	0.492789	-0.020556	0.084039	0.256999	0.035393	-0.200217	-0.135019	-0.480847	-0.034911	0.14056	-0.395952	-0.779317	-0.769863	-0.484677	-0.155263	-0.209403	-0.504809	-0.23404	-0.634844	-0.00383	-0.120352	-0.349963	-0.108857	0.545277
13467959	AT4G12890	2.38525	2.52901	2.14194	2.21894	2.03149	2.34053	2.39758	2.35553	2.44224	2.1743	2.13871	2.64501	2.62826	2.0893	1.9049	2.33765	2.37978	2.85665	1.89524	2.46474	2.33765	2.34053	2.80472	2.18635	0.24301	-0.439706	-0.237042	0.118709	0.348291	0.516121	0.012326	-0.173483	0.3003	-0.044638	0.107217	0.30448	-0.733028	0.375438	0.432754	0.002876	0.42494	-0.670298	-0.745354	0.548921	0.132454	0.047514	0.317723	-0.974778
13468185	AT4G13540	8.20321	7.22405	8.01797	8.12074	8.48661	7.83528	8.10354	7.4956	7.71237	8.164	7.96638	7.90079	6.59356	6.17604	6.74614	7.07108	7.16841	7.22636	5.92824	5.96212	6.52488	7.05349	7.08173	6.77519	-1.60965	-1.04801	-1.27184	-1.04965	-1.3182	-0.608915	-0.099668	0.271546	-0.30561	0.043263	-0.520232	0.06551	-0.665319	-0.213927	-0.221258	-0.017596	-0.086684	-0.451178	-0.565651	-0.485473	0.084352	-0.060859	0.433548	-0.516688
13468204	AT4G13610	3.66773	4.72794	4.67622	4.02361	3.9646	5.04047	3.69185	4.57875	4.24324	3.71539	3.39511	4.47446	3.69003	3.74955	3.2942	3.65185	2.88385	3.53146	2.92554	3.3275	3.04518	2.94391	3.75074	3.3676	0.022302	-0.978388	-1.38203	-0.371763	-1.08075	-1.50901	0.024118	-0.149191	-0.432982	-0.308223	-0.569492	-0.566005	-0.764491	-0.422056	-0.249018	-0.707936	0.866888	-0.16386	-0.788609	-0.272865	0.183964	-0.399713	1.43638	0.402145
13468322	AT4G13955	3.06202	3.24143	3.06489	3.27146	3.01136	3.02519	3.03863	3.13548	3.36193	3.28504	2.87135	2.97707	3.95302	3.10507	3.09649	3.0772	2.99007	2.82731	2.94833	3.32721	3.31135	3.12777	2.87992	3.06073	0.891006	-0.136359	0.031598	-0.194265	-0.021288	-0.197883	-0.023389	-0.105955	0.297036	0.013577	-0.140008	-0.048116	-1.00469	0.222134	0.214864	0.050568	-0.11015	0.23342	-0.981304	0.328089	-0.082172	0.036991	0.029858	0.281536
13468376	AT4G14140	2.25684	2.97571	2.48405	2.71334	2.57361	2.50151	2.70031	2.87595	2.84478	2.84966	3.07383	2.75983	3.17583	3.2852	2.36452	3.08776	3.26548	2.41209	2.41901	2.44805	2.39015	2.86223	2.60224	2.86492	0.918986	0.309492	-0.119526	0.374427	0.691875	-0.089426	0.443469	-0.099766	0.360728	0.136326	0.500218	0.258312	-0.756814	-0.837157	0.025622	-0.225537	-0.663243	0.452834	-1.20028	-0.737391	-0.335106	-0.361863	-1.16346	0.194522
13468495	AT4G14450	6.4625	5.03879	5.30876	6.2638	5.17195	5.0946	6.42585	6.11411	6.1738	6.26184	4.47419	5.20342	6.01691	5.26129	6.61607	5.58465	5.12073	5.54391	6.75636	6.47828	6.41437	6.57425	5.37381	6.10648	-0.445586	0.222499	1.30732	-0.67915	-0.051222	0.449305	-0.036648	1.07533	0.865042	-0.001956	-0.69776	0.108813	0.73945	1.21699	-0.201707	0.989601	0.253087	0.562569	0.776098	0.141668	-1.06675	0.991557	0.950847	0.453756
13468583	AT4G14630	4.0886	4.21497	4.25098	4.0132	3.78195	3.67398	3.90886	4.0381	4.04307	4.2222	3.85192	6.30786	4.45545	4.07957	4.04835	5.01666	4.62486	5.57774	5.59575	4.62994	4.54587	5.34476	5.36611	6.62271	0.366845	-0.135396	-0.202626	1.00346	0.842906	1.90376	-0.179745	-0.176868	-0.207911	0.209003	0.069968	2.63388	1.1403	0.550365	0.497522	0.328095	0.741252	1.04496	1.32005	0.727233	0.705433	0.119092	0.671284	-1.58891
13468605	AT4G14695	3.19974	4.47952	3.46252	3.0066	3.65563	3.35099	3.1197	3.0066	2.9678	2.82197	3.64452	2.68644	2.13016	2.56438	2.78698	2.54766	2.9925	2.45745	2.84355	2.62724	2.45397	2.48202	2.69907	2.37542	-1.06958	-1.91514	-0.67554	-0.458937	-0.663131	-0.893539	-0.080043	-1.47292	-0.494716	-0.184633	-0.011103	-0.664553	0.713388	0.062854	-0.333004	-0.06564	-0.293423	-0.082035	0.793431	1.53577	0.161712	0.118993	-0.28232	0.582518
13468795	AT4G15075	3.54429	3.81828	3.6793	3.55858	3.43762	3.65428	3.49555	3.50103	3.53268	3.73722	3.52187	3.26141	4.32946	4.55321	4.35804	4.23039	4.44488	5.20795	5.42719	4.30809	4.27041	4.82554	5.53306	5.82107	0.785174	0.734933	0.678738	0.671813	1.00727	1.55368	-0.048742	-0.317246	-0.146624	0.178638	0.084254	-0.392861	1.09773	-0.245127	-0.087633	0.595147	1.08818	0.613123	1.14647	0.072119	0.058991	0.416509	1.00392	1.00598
13469040	AT4G15430	7.9991	6.31001	6.03704	9.19726	9.17696	8.33618	7.56805	5.89491	6.44926	8.8125	8.86679	8.36674	8.14419	6.43902	5.89325	8.39716	8.4565	8.13246	7.38058	6.4843	6.11681	8.37347	8.49381	8.09366	0.14509	0.129004	-0.143787	-0.800098	-0.720451	-0.203726	-0.431051	-0.415104	0.412218	-0.384754	-0.310167	0.030563	-0.763615	0.045285	0.223559	-0.023685	0.037304	-0.038796	-0.332564	0.460389	-0.188659	0.361069	0.347471	-0.069359
13469163	AT4G15610	8.22713	8.47546	7.67427	8.26389	8.05161	7.1557	8.41501	8.77982	8.85616	8.43086	7.81357	8.90899	8.36252	8.66069	8.93152	9.39393	8.46508	7.99308	9.29668	9.60749	9.50582	9.6712	8.01422	9.38779	0.135391	0.185229	1.25725	1.13004	0.413466	0.837386	0.187881	0.304364	1.18189	0.166969	-0.238046	1.75329	0.934163	0.946801	0.574301	0.277269	-0.450858	1.39471	0.746282	0.642437	-0.607584	0.1103	-0.212812	-0.358585
13469213	AT4G15733	2.38092	2.16316	1.90705	2.37231	2.36372	2.22687	2.47742	2.21708	2.17218	2.13374	2.20559	2.13721	3.88241	3.51668	2.67451	2.6638	2.19251	2.49288	2.62105	2.50648	2.6933	2.57237	2.36591	2.48584	1.50149	1.35352	0.767467	0.291494	-0.17121	0.266008	0.096496	0.053926	0.265133	-0.238568	-0.158133	-0.089656	-1.26136	-1.0102	0.018788	-0.091436	0.173395	-0.007036	-1.35785	-1.06413	-0.246345	0.147132	0.331528	0.08262
13469216	AT4G15735	2.83	2.59701	2.78636	2.66619	2.54761	2.75353	2.75717	2.92465	2.74062	2.65372	2.6574	2.80961	3.01067	3.06388	3.0084	3.12463	2.88144	2.63928	3.76792	2.73582	2.93421	2.95272	3.2751	2.52542	0.180667	0.466867	0.222037	0.45844	0.333832	-0.114259	-0.072835	0.327641	-0.04574	-0.01247	0.109792	0.056076	0.757247	-0.32806	-0.074185	-0.171915	0.393661	-0.113859	0.830082	-0.655701	-0.028445	-0.159445	0.283869	-0.169935
13469440	AT4G16140	8.24122	8.30138	8.2718	8.85877	8.59855	8.75909	7.84404	7.63969	7.99747	8.94571	8.60343	8.43891	8.01225	7.65062	7.79569	8.401	8.33588	8.2264	6.99435	7.44809	7.34126	8.26535	8.46769	8.14376	-0.228974	-0.650755	-0.476108	-0.457778	-0.262672	-0.532695	-0.397181	-0.661681	-0.274327	0.08694	0.004879	-0.320185	-1.0179	-0.20253	-0.454436	-0.135641	0.131808	-0.082635	-0.62072	0.459151	-0.180109	-0.222581	0.126929	0.23755
13469540	AT4G16447	4.84248	4.80248	5.88382	5.66812	4.69041	5.25909	4.62154	4.86498	5.52622	5.72673	4.97477	5.30835	4.78592	4.76775	4.7328	4.9149	4.59635	4.94485	4.09345	4.53448	4.75897	5.55017	4.92958	5.14738	-0.056557	-0.034737	-1.15102	-0.753218	-0.094065	-0.314243	-0.220942	0.06249	-0.357605	0.058607	0.284356	0.04926	-0.692477	-0.233266	0.026175	0.63527	0.333227	0.20253	-0.471535	-0.295756	0.38378	0.576663	0.048871	0.15327
13469718	AT4G16835	4.68428	5.69079	5.46503	5.81127	4.8132	4.61537	4.936	5.80651	5.52156	6.22987	4.7069	5.08171	4.19686	4.16168	4.30646	4.16638	4.09376	3.65229	3.21814	4.02707	4.10208	4.07368	3.35286	3.88877	-0.487414	-1.52911	-1.15857	-1.64489	-0.719446	-0.963079	0.251724	0.11572	0.056533	0.418599	-0.106301	0.466348	-0.97872	-0.134601	-0.204381	-0.0927	-0.740896	0.236481	-1.23044	-0.250321	-0.260914	-0.511299	-0.634595	-0.229867
13469741	AT4G16850	7.01556	6.83252	6.88974	7.43239	7.41921	7.08079	6.96149	7.06873	7.07349	7.17012	7.29925	7.08844	5.432	4.99488	5.04927	5.05733	4.67251	5.02291	4.53653	5.39314	4.8339	5.20509	4.86349	4.49298	-1.58356	-1.83763	-1.84047	-2.37507	-2.7467	-2.05788	-0.054071	0.236209	0.183754	-0.262277	-0.119961	0.007652	-0.895463	0.398254	-0.215372	0.147761	0.190982	-0.52993	-0.841392	0.162045	-0.399126	0.410038	0.310943	-0.537582
13469960	AT4G17500	6.8936	6.85373	7.3087	6.09394	6.44186	5.29278	7.4669	7.54857	7.29926	7.26772	6.1862	6.57202	7.83584	7.06214	7.00635	6.55692	6.39639	6.90334	8.49007	8.07268	7.43629	8.19086	6.80582	7.73762	0.942238	0.208412	-0.302356	0.462985	-0.045475	1.61056	0.573297	0.694845	-0.009441	1.17378	-0.25566	1.27924	0.654226	1.01054	0.429946	1.63393	0.40943	0.834274	0.080929	0.315691	0.439387	0.460155	0.66509	-0.444964
13470989	AT4G19970	4.81886	5.17735	4.09734	4.8793	5.00784	4.85526	4.72246	4.96928	5.46308	5.40794	5.40044	6.55737	5.32935	5.48762	4.95464	5.90581	5.57185	5.69205	6.30668	6.17424	6.06004	6.04804	6.31401	7.2513	0.510493	0.310267	0.857298	1.02651	0.564004	0.836782	-0.096403	-0.208075	1.36574	0.528637	0.392595	1.7021	0.977321	0.686618	1.1054	0.142231	0.742167	1.55925	1.07372	0.894693	-0.260343	-0.386406	0.349572	-0.142854
13471126	AT4G20310	7.65144	7.99012	7.84363	7.51624	8.10988	7.94785	7.70263	7.57421	7.56087	7.58072	7.80558	7.85598	7.30485	7.17228	7.20492	7.29058	6.98993	7.46152	6.45628	6.97766	7.30639	7.2905	7.26817	7.00854	-0.346595	-0.817837	-0.638712	-0.225656	-1.11995	-0.486325	0.051183	-0.415906	-0.282763	0.064488	-0.304305	-0.09187	-0.848568	-0.194624	0.101469	-7.6e-05	0.278236	-0.452988	-0.899751	0.221282	0.384232	-0.064564	0.582541	-0.361118
13471328	AT4G20680	2.44722	2.30918	2.26693	2.10733	2.30184	2.55797	2.02373	2.32415	2.28823	2.05267	2.20901	2.19434	2.08143	2.26693	2.26693	2.13046	2.30422	2.35896	2.79152	2.51394	2.87995	2.16401	2.44782	2.58906	-0.36579	-0.042251	0	0.023133	0.002375	-0.199015	-0.423489	0.014976	0.021309	-0.054663	-0.092827	-0.363634	0.710094	0.247015	0.613024	0.033544	0.143609	0.230099	1.13358	0.232039	0.591715	0.088207	0.236436	0.593733
13471556	AT4G21240	3.53427	3.64878	3.61449	4.21268	3.51681	3.53736	3.75488	3.43402	3.46082	3.82925	3.61493	4.24665	4.04601	3.28422	4.01975	3.05124	3.5525	3.57535	3.28604	3.18386	3.5525	3.47987	3.3565	3.51073	0.511737	-0.364559	0.405258	-1.16144	0.035689	0.037989	0.220604	-0.214766	-0.153671	-0.383427	0.098122	0.709292	-0.759974	-0.100367	-0.467245	0.428634	-0.195997	-0.064617	-0.980578	0.114399	-0.313574	0.812061	-0.294119	-0.773909
13471848	AT4G21780	3.13535	2.51148	2.6904	2.84308	3.04837	2.85478	2.71597	2.50964	2.41832	2.82542	3.23872	2.60038	3.12211	2.55781	2.75057	2.97624	2.67034	2.63749	2.18572	2.57705	2.65577	2.86691	2.71371	2.85192	-0.013232	0.046323	0.060163	0.133161	-0.378033	-0.217296	-0.419375	-0.001846	-0.27208	-0.017661	0.190348	-0.254399	-0.936392	0.019239	-0.094801	-0.10933	0.043377	0.214436	-0.517017	0.021085	0.177279	-0.091669	-0.146971	0.468835
13471942	AT4G21970	3.76612	3.10452	2.73941	2.91373	3.39638	3.56981	3.64201	3.09595	2.45999	2.80697	3.21289	2.95354	4.4361	2.92438	2.52969	2.56155	2.98242	2.93074	2.85155	2.91162	3.11031	2.35989	3.06753	2.65591	0.669972	-0.180136	-0.20971	-0.352182	-0.413958	-0.639071	-0.124113	-0.008571	-0.279411	-0.106766	-0.183495	-0.616266	-1.58455	-0.012764	0.580611	-0.201658	0.085104	-0.274828	-1.46043	-0.004193	0.860022	-0.094892	0.268599	0.341438
13471976	AT4G22060	2.45589	2.33008	2.43986	2.70508	2.74473	2.49614	2.5762	2.76921	2.56075	2.66519	2.64833	2.65326	3.28671	2.50595	2.8209	2.75108	2.75993	2.61574	2.32888	2.56933	2.92044	2.6277	2.60625	2.65949	0.830824	0.17587	0.381045	0.045999	0.015197	0.119601	0.120313	0.439135	0.120895	-0.039897	-0.096403	0.157124	-0.957827	0.063386	0.09954	-0.123383	-0.153677	0.043749	-1.07814	-0.375749	-0.021355	-0.083486	-0.057274	-0.113375
13472069	AT4G22430	3.05296	2.60065	2.90245	2.8338	2.57221	2.70947	3.07336	2.82403	2.71948	2.80434	3.00453	2.95549	3.91303	3.76388	3.16926	3.12186	3.16403	2.73204	3.23944	3.10631	3.31297	3.16461	3.67922	3.04587	0.860075	1.16322	0.266818	0.288052	0.591824	0.022567	0.020406	0.223378	-0.182969	-0.029468	0.432321	0.246017	-0.673597	-0.657569	0.143706	0.042749	0.515187	0.313832	-0.694003	-0.880947	0.326675	0.072217	0.082866	0.067815
13472076	AT4G22513	7.14954	7.26387	4.42971	7.02703	5.62319	5.81379	7.64015	2.94282	5.56868	3.84971	6.43095	4.21097	6.19287	6.2171	4.27128	6.51168	7.59362	7.30282	7.20751	6.71742	6.352	7.38017	7.4045	6.91357	-0.956673	-1.04678	-0.158429	-0.51536	1.97043	1.48903	0.490604	-4.32105	1.13897	-3.17733	0.80776	-1.60282	1.01464	0.50032	2.08071	0.868499	-0.189119	-0.389245	0.524035	4.82137	0.941743	4.04582	-0.996879	1.21358
13472084	AT4G22520	5.76028	5.94658	4.23851	6.48179	4.83085	4.67137	6.26402	4.40256	4.78757	4.55582	5.57616	5.1778	5.51867	6.14825	4.80616	5.70271	6.3879	6.10371	6.8178	5.90212	6.48695	6.38095	6.62667	6.43511	-0.241608	0.201673	0.567648	-0.779076	1.55705	1.43234	0.503737	-1.54401	0.549061	-1.92597	0.74531	0.506424	1.29913	-0.246131	1.68079	0.678239	0.238775	0.331398	0.795394	1.29788	1.13173	2.6042	-0.506535	-0.175026
13472138	AT4G22730	5.69195	5.94484	5.94706	7.04692	6.71555	7.15057	5.52158	5.99406	5.79824	6.56271	6.41789	6.84412	5.94184	5.94284	5.99507	6.90765	6.60527	6.99919	5.29207	5.4221	5.93921	6.48805	6.53507	6.58303	0.24989	-0.002	0.048013	-0.139268	-0.110279	-0.151375	-0.170376	0.049222	-0.148814	-0.484212	-0.297651	-0.306444	-0.649771	-0.520736	-0.055854	-0.419599	-0.070195	-0.416157	-0.479395	-0.569958	0.09296	0.064613	0.227456	-0.109713
13472153	AT4G22785	5.49128	6.64952	6.67187	5.90035	6.7791	6.70997	5.97672	6.4774	5.51452	5.72436	5.85892	6.79527	6.79464	5.88216	6.35966	3.28824	5.99941	6.34037	5.92093	7.25507	6.76755	6.66251	7.30931	6.59771	1.30336	-0.767358	-0.312207	-2.61211	-0.779689	-0.369594	0.48544	-0.172117	-1.15735	-0.175989	-0.92018	0.085303	-0.873709	1.37291	0.407893	3.37426	1.3099	0.257341	-1.35915	1.54503	1.56524	3.55025	2.23008	0.172038
13472287	AT4G23110	3.38894	3.08789	3.50494	3.1671	3.49988	3.13888	3.40729	3.59829	3.45045	3.33199	3.16831	3.10772	4.53887	3.75059	3.92425	3.3921	3.46234	3.70189	3.40538	3.46789	3.38894	3.38894	3.56304	3.74913	1.14993	0.662703	0.41931	0.225	-0.037545	0.56302	0.018353	0.5104	-0.054489	0.164886	-0.331577	-0.03115	-1.13349	-0.2827	-0.535306	-0.003163	0.100697	0.047232	-1.15184	-0.7931	-0.480817	-0.168049	0.432274	0.078382
13472296	AT4G23140	7.20425	7.4351	7.00329	6.86657	6.33387	7.24343	7.47752	7.38833	7.52926	7.81741	7.86679	9.18162	6.95189	7.17768	7.77502	7.38263	7.02014	7.5232	7.71122	7.70893	7.74362	7.77955	7.86776	7.78368	-0.252364	-0.257421	0.771736	0.516058	0.686272	0.279775	0.273265	-0.046769	0.525969	0.950839	1.53292	1.93819	0.759335	0.53125	-0.031407	0.396927	0.847617	0.260477	0.48607	0.578019	-0.557376	-0.553912	-0.685301	-1.67771
13472651	AT4G23960	3.65158	3.1919	3.13038	3.06887	2.86184	3.1243	3.46659	3.15989	3.25116	3.21144	3.05779	2.90741	2.70949	3.07238	3.58811	3.23787	3.31023	3.05982	3.44911	3.2738	3.76477	3.59771	3.28797	3.39712	-0.94209	-0.119526	0.457727	0.168997	0.448389	-0.064475	-0.184993	-0.032014	0.120782	0.142562	0.195949	-0.216891	0.739621	0.201421	0.176667	0.359835	-0.022254	0.337295	0.924614	0.233435	0.055885	0.217273	-0.218203	0.554186
13472859	AT4G24310	5.13583	5.41946	5.28834	5.6259	5.57493	5.91102	5.63513	5.85529	5.74622	5.3432	5.55253	5.31802	5.30961	5.45532	5.53768	6.09187	5.34289	5.30097	6.25549	5.93898	4.85666	5.74404	5.70305	5.25692	0.17378	0.03586	0.24934	0.465969	-0.23204	-0.610046	0.499297	0.435836	0.45788	-0.282699	-0.0224	-0.592997	0.945875	0.483658	-0.681015	-0.347835	0.360162	-0.044047	0.446578	0.047822	-1.13889	-0.065136	0.382562	0.54895
13472868	AT4G24350	9.11179	8.53803	8.96351	8.57006	9.02113	8.82654	8.69657	8.96503	9.81042	9.67885	9.80956	9.34899	7.90885	8.00222	7.99258	7.97895	8.1128	8.04229	8.58199	8.30837	8.50733	8.51626	8.76675	8.18943	-1.20294	-0.535816	-0.970936	-0.591105	-0.908327	-0.784253	-0.415223	0.426994	0.846903	1.10879	0.788438	0.522443	0.673142	0.306154	0.514755	0.537308	0.653948	0.147139	1.08837	-0.12084	-0.332148	-0.571485	-0.13449	-0.375304
13472990	AT4G24480	6.7883	6.85763	6.22918	6.80434	7.44656	7.77071	6.63022	6.68361	6.23618	6.64484	7.41484	7.70096	6.94985	6.85489	7.20531	7.54954	7.51215	7.42121	6.2812	7.33235	7.15546	7.54847	7.32438	7.56976	0.16155	-0.002744	0.976134	0.745208	0.065586	-0.349505	-0.158081	-0.174019	0.006999	-0.159499	-0.031719	-0.069754	-0.668651	0.47747	-0.049857	-0.001073	-0.187768	0.148548	-0.51057	0.651489	-0.056856	0.158426	-0.156049	0.218302
13473051	AT4G24600	3.16243	2.88505	3.09156	3.21172	2.9115	2.50527	3.44117	2.92618	3.08914	2.83918	2.92618	2.78875	3.15468	3.38603	3.75216	3.77701	3.09156	3.31778	3.79835	3.10028	3.21807	3.2066	3.12827	2.83892	-0.007748	0.50098	0.660596	0.565288	0.180059	0.812506	0.278743	0.041134	-0.002419	-0.372545	0.014682	0.283476	0.643674	-0.285751	-0.534087	-0.570412	0.036705	-0.478856	0.364931	-0.326885	-0.531668	-0.197867	0.022023	-0.762332
13473766	AT4G26260	5.38062	3.54462	4.00801	3.1437	3.97619	3.17879	4.97992	3.75702	3.39692	3.35559	3.55348	4.45317	4.09499	4.33421	3.74744	4.06207	3.73792	4.01013	5.52843	4.22361	4.99731	3.95504	3.94641	4.07276	-1.28563	0.789586	-0.260569	0.918373	-0.238267	0.831337	-0.4007	0.212399	-0.611089	0.211895	-0.422707	1.27438	1.43344	-0.110595	1.24986	-0.107032	0.208491	0.062626	1.83414	-0.322994	1.86095	-0.318927	0.631198	-1.21175
13474117	AT4G27070	5.05267	5.51153	5.4252	5.3328	6.50718	6.08103	5.54922	6.34827	5.89647	5.66971	6.9897	7.6831	5.82788	5.90189	5.80194	5.85435	6.50797	6.62505	6.73715	6.41104	6.56245	5.92749	7.04771	7.25539	0.775211	0.390367	0.376738	0.521552	0.000798	0.544017	0.496556	0.836747	0.471278	0.336912	0.482524	1.60207	0.909276	0.509142	0.760515	0.073135	0.539733	0.630339	0.41272	-0.327605	0.289237	-0.263777	0.057209	-0.971732
13474308	AT4G27657	6.13382	6.13612	8.51551	8.342	7.62145	8.5075	6.18301	5.87403	7.20195	8.76328	7.54513	8.33763	6.40547	7.13755	8.31593	8.2963	7.93561	8.45586	7.14098	7.30185	8.13635	8.86607	8.22264	8.71955	0.271658	1.00142	-0.199579	-0.045704	0.314153	-0.051645	0.049199	-0.262092	-1.31356	0.421272	-0.076325	-0.169874	0.735508	0.164303	-0.179581	0.569775	0.287032	0.263694	0.686309	0.426395	1.13398	0.148503	0.363357	0.433568
13474390	AT4G27790	3.98193	3.47805	3.21497	3.91358	3.4508	3.67612	3.91358	3.89953	3.83184	4.11432	3.42636	5.035	3.74462	4.19509	4.01646	3.53241	4.05269	3.91358	4.58717	4.2456	3.56868	4.03393	3.97257	4.30337	-0.237307	0.71704	0.80149	-0.381161	0.601881	0.237456	-0.068352	0.42148	0.61687	0.200748	-0.024448	1.35888	0.842552	0.050506	-0.447773	0.501511	-0.080111	0.389791	0.910904	-0.370974	-1.06464	0.300763	-0.055663	-0.969094
13474688	AT4G28460	4.20285	3.25364	3.44042	3.23766	3.1151	2.99228	4.32547	4.30694	3.75007	4.48675	3.58433	3.70342	5.69542	4.49976	3.39302	4.66154	4.85821	3.76447	6.47842	5.93373	4.73004	5.56023	4.78611	5.08213	1.49257	1.24612	-0.047401	1.42388	1.74312	0.772196	0.122618	1.0533	0.30965	1.24909	0.469235	0.711141	0.783	1.43397	1.33702	0.898686	-0.072104	1.31766	0.660382	0.380665	1.02737	-0.350399	-0.541339	0.606517
13474825	AT4G28703	5.15695	4.16559	3.65455	3.68009	3.64271	3.54129	5.06701	4.38287	3.87546	3.41295	3.13538	3.02011	3.6205	3.8546	3.53085	3.43741	3.33025	3.42368	4.34843	4.13338	3.39576	3.34293	3.4163	3.18489	-1.53644	-0.310991	-0.123698	-0.242682	-0.312461	-0.117606	-0.089941	0.21728	0.220914	-0.267141	-0.50733	-0.52118	0.72793	0.278783	-0.135092	-0.094475	0.086047	-0.238792	0.817871	0.061503	-0.356006	0.172666	0.593377	0.282388
13474996	AT2G44320	5.86947	5.7021	6.58066	6.0518	6.19843	6.26098	5.5305	6.61081	5.52904	5.68862	5.42654	6.41352	5.41899	6.02157	6.12732	5.69163	5.72812	5.74481	6.29064	5.3744	5.65155	5.07834	6.22745	5.83172	-0.450479	0.319474	-0.453338	-0.360175	-0.470307	-0.516167	-0.338966	0.908708	-1.05162	-0.363178	-0.771893	0.152546	0.871649	-0.647175	-0.475768	-0.61329	0.499322	0.086914	1.21061	-1.55588	0.575851	-0.250112	1.27121	-0.065632
13475188	AT4G29340	5.4023	5.58341	4.93813	4.42922	4.2096	5.22119	5.33685	5.72915	4.96254	4.82338	4.59748	4.62326	5.18401	5.45475	5.71607	4.87169	5.52059	5.5161	5.84332	5.81822	5.79007	4.91059	4.98363	5.26542	-0.218288	-0.128663	0.777948	0.442465	1.31099	0.294901	-0.06545	0.145738	0.024411	0.394155	0.387886	-0.597939	0.659314	0.363471	0.073995	0.038897	-0.536961	-0.250678	0.724764	0.217733	0.049584	-0.355258	-0.924847	0.347261
13475427	AT4G30067	2.42368	2.60881	2.5086	2.60881	2.38948	2.75317	2.79864	2.6856	2.22808	2.49428	2.28221	2.43101	3.53552	2.5825	2.72268	2.61197	2.67797	2.60881	2.74172	2.86223	2.93421	2.43338	2.29662	2.82275	1.11184	-0.026305	0.214082	0.003163	0.28849	-0.144366	0.374956	0.076795	-0.280523	-0.114531	-0.107266	-0.322165	-0.793799	0.279725	0.211532	-0.178591	-0.38135	0.213939	-1.16875	0.20293	0.492055	-0.06406	-0.274084	0.536104
13475813	AT4G31000	7.09495	6.56279	6.35001	6.82354	6.16592	5.03923	7.05642	6.57489	6.13898	6.5828	5.35262	4.82675	6.79694	6.55132	5.91392	6.3662	6.00531	5.63307	6.11848	5.91218	5.82776	5.52474	5.52153	5.87993	-0.298015	-0.011469	-0.436092	-0.457345	-0.160616	0.593837	-0.038526	0.012104	-0.211027	-0.240745	-0.813302	-0.212484	-0.678458	-0.63914	-0.086153	-0.841461	-0.483778	0.246866	-0.639932	-0.651244	0.124874	-0.600716	0.329524	0.45935
13476374	AT4G32170	4.46717	4.11036	3.92497	4.31581	4.33927	4.54262	4.87325	4.32967	3.97459	4.31111	4.02666	4.08472	5.19264	4.64594	4.26336	4.70199	4.55155	4.37776	4.26619	4.50989	4.3168	4.59663	4.59003	4.37428	0.725474	0.535579	0.338388	0.386178	0.21228	-0.164865	0.40608	0.219311	0.049615	-0.0047	-0.312617	-0.457903	-0.926448	-0.136047	0.053442	-0.105361	0.038472	-0.003478	-1.33253	-0.355358	0.003827	-0.100661	0.351089	0.454425
13476861	AT4G32870	6.70442	5.71649	4.12336	6.15269	6.2192	6.60739	6.77213	5.93971	5.46755	5.6279	7.13953	7.66301	7.50979	6.64504	6.83226	7.16384	7.70085	8.33516	8.31603	7.40348	7.38506	7.6116	8.61428	8.5614	0.80537	0.928548	2.70889	1.01115	1.48165	1.72777	0.067708	0.223215	1.34418	-0.524788	0.920336	1.05562	0.806237	0.758439	0.552802	0.447767	0.913427	0.226235	0.738529	0.535224	-0.791378	0.972555	-0.006909	-0.829383
13477000	AT4G33290	4.08776	4.73615	4.73379	4.03984	4.7274	4.84048	4.21187	4.98846	4.42067	3.7775	4.39499	4.86497	4.19379	4.04697	3.35059	3.1875	4.1101	3.44623	3.28366	3.19069	3.24763	3.34788	3.5729	3.39679	0.10603	-0.689181	-1.3832	-0.852342	-0.6173	-1.39426	0.124114	0.252312	-0.313129	-0.262347	-0.332407	0.02449	-0.910125	-0.856276	-0.102959	0.160373	-0.537197	-0.049432	-1.03424	-1.10859	0.21017	0.42272	-0.20479	-0.073922
13477192	AT4G33720	2.97475	2.96604	2.96625	2.86213	2.59526	2.86292	2.84189	3.03753	2.78631	2.83174	2.66477	2.57012	2.60701	3.14988	3.29763	2.96914	3.27007	3.02356	3.33747	3.31098	3.19055	3.19189	3.078	3.24124	-0.367734	0.183835	0.331388	0.107006	0.674811	0.160635	-0.132856	0.071484	-0.179938	-0.030392	0.069514	-0.292802	0.730457	0.161103	-0.107085	0.22275	-0.192071	0.217679	0.863313	0.089619	0.072853	0.253142	-0.261585	0.510481
13477295	AT4G34060	6.09021	5.66139	5.61709	5.63286	7.4383	7.81511	6.41073	5.69791	5.51061	5.65487	7.64596	7.25239	6.19767	5.62153	4.94877	5.60061	7.37175	7.54701	5.4425	5.33197	5.45383	5.10484	7.34896	7.30038	0.107464	-0.039863	-0.668322	-0.032248	-0.066549	-0.268095	0.320523	0.036518	-0.106482	0.022009	0.207659	-0.562714	-0.755165	-0.289556	0.505062	-0.495769	-0.022796	-0.246628	-1.07569	-0.326074	0.611544	-0.517778	-0.230455	0.316086
13477393	AT4G34210	6.34176	5.50414	5.64064	5.76725	5.59205	5.66576	6.0391	5.9055	5.5127	4.93515	5.73581	5.71311	6.36447	6.11176	6.19732	6.29381	6.26612	6.70444	7.3939	6.39436	6.30163	5.92751	5.63595	6.68006	0.022703	0.607617	0.556677	0.526564	0.67407	1.03869	-0.302662	0.401352	-0.127939	-0.8321	0.143765	0.047351	1.02943	0.282596	0.104312	-0.366297	-0.630173	-0.02438	1.33209	-0.118756	0.232251	0.465803	-0.773938	-0.071731
13477510	AT4G34400	4.15649	3.76164	3.71722	3.83409	3.76944	3.95959	3.60647	3.85274	4.36413	3.84705	3.54144	3.4061	4.87285	4.68006	4.58419	5.48936	5.51496	4.22067	5.56242	5.31532	4.31566	4.89603	4.99697	5.17785	0.716357	0.918417	0.866971	1.65528	1.74552	0.261087	-0.550018	0.091096	0.646913	0.012964	-0.227992	-0.553486	0.689569	0.635259	-0.268528	-0.593329	-0.517987	0.957181	1.23959	0.544163	-0.915441	-0.606293	-0.289995	1.51067
13477663	AT4G34680	6.19389	5.86048	5.60122	6.07546	5.80357	6.01031	6.12449	5.80591	5.86564	6.00533	5.86177	6.01239	5.53322	5.80354	6.42568	6.64942	6.88157	6.85058	6.24904	6.453	6.31122	6.72556	6.67772	7.09195	-0.660669	-0.056933	0.824459	0.573963	1.078	0.840267	-0.069394	-0.054569	0.264426	-0.070128	0.058199	0.002072	0.715822	0.649461	-0.11446	0.076142	-0.203859	0.241366	0.785216	0.70403	-0.378886	0.14627	-0.262058	0.239294
13478072	AT4G35630	7.07982	6.91623	6.77274	6.81444	6.58629	6.85705	6.83271	7.39425	7.35033	7.01397	7.30442	7.67871	7.20751	7.30075	7.1194	6.82896	6.6636	7.08623	7.93986	7.91323	7.40527	7.4969	7.22388	7.51909	0.12769	0.384514	0.346654	0.014518	0.077314	0.229182	-0.247108	0.478021	0.577587	0.199536	0.71813	0.821662	0.732347	0.612483	0.285878	0.66794	0.560283	0.432859	0.979455	0.134462	-0.291709	0.468404	-0.157847	-0.388803
13478085	AT4G35660	3.42661	3.22658	3.37922	2.91223	3.17431	3.29149	3.34296	3.29911	3.27631	3.07705	3.20438	3.35175	3.26421	3.67807	3.59883	3.85461	3.55665	3.5161	3.9478	3.64298	3.70286	3.63006	3.40045	3.60794	-0.162401	0.451491	0.219611	0.942378	0.382341	0.224611	-0.083642	0.07253	-0.102905	0.164813	0.030073	0.060262	0.683591	-0.035086	0.104029	-0.22455	-0.156203	0.091841	0.767233	-0.107616	0.206934	-0.389363	-0.186276	0.031579
13478112	AT4G35710	4.45682	5.25035	4.65519	5.10134	4.47599	5.93874	4.42737	5.11092	4.42104	4.9518	4.73253	4.97345	5.17347	4.68384	5.13713	5.33456	4.79767	4.8232	4.45564	4.63562	4.53787	5.15896	4.18884	5.3429	0.716657	-0.566516	0.481941	0.233219	0.321685	-1.11555	-0.029443	-0.139431	-0.234145	-0.149542	0.256542	-0.965292	-0.71783	-0.048219	-0.599256	-0.175601	-0.608838	0.519703	-0.688387	0.091212	-0.365111	-0.026059	-0.86538	1.485
13478980	AT4G37990	5.31705	5.00496	5.17311	4.72821	4.77553	4.16588	5.46503	5.71055	5.81589	5.04245	6.95665	8.92181	5.65341	5.51033	5.29382	5.36052	5.28202	5.92162	6.80249	5.95562	6.3971	5.77501	5.8775	8.91084	0.336358	0.50537	0.120718	0.632314	0.506486	1.75573	0.147975	0.705595	0.642786	0.314235	2.18111	4.75593	1.14908	0.445298	1.10328	0.414481	0.595485	2.98923	1.0011	-0.260297	0.460495	0.100246	-1.58563	-1.7667
13479788	AT4G39940	9.13767	9.1576	9.65156	9.67695	10.6281	10.9759	9.39792	10.037	10.0536	10.1693	11.2126	11.2264	10.2796	10.376	10.1837	10.1444	11.0264	11.1346	10.9621	10.8824	10.5565	10.8815	11.2492	11.3074	1.14193	1.21836	0.532134	0.467405	0.39828	0.1587	0.260255	0.879438	0.402064	0.492335	0.58449	0.25045	0.6825	0.50647	0.37284	0.73717	0.22276	0.17273	0.422245	-0.372968	-0.029224	0.244835	-0.36173	-0.07772
13479796	AT4G39950	6.89846	7.36003	8.12316	7.86324	8.38233	8.57167	7.23642	8.27203	8.6127	8.35225	9.34749	10.1073	8.29159	8.98035	8.35175	7.77673	8.01089	8.65998	9.38345	9.3575	8.84092	8.54846	8.98699	9.85136	1.39313	1.62032	0.228584	-0.086505	-0.371445	0.088307	0.337963	0.912002	0.489537	0.489015	0.965152	1.53563	1.09186	0.377147	0.489171	0.771733	0.976101	1.19138	0.7539	-0.534855	-0.000366	0.282718	0.010949	-0.344246
13479847	AT4G40100	3.71905	3.49937	3.9376	3.95225	3.71313	3.33935	3.62435	3.32671	3.3653	3.27191	3.72056	3.16748	4.69403	3.71784	4.06426	3.86797	3.57592	3.61152	3.53194	3.78859	4.55841	3.58533	4.10151	3.57981	0.974984	0.218464	0.126653	-0.084275	-0.137212	0.272168	-0.0947	-0.172661	-0.572303	-0.680335	0.007434	-0.171878	-1.16209	0.070759	0.494158	-0.282642	0.525597	-0.031716	-1.06739	0.24342	1.06646	0.397693	0.518163	0.140162
13480518	AT4G01380	5.69309	6.29593	5.75578	5.90222	7.03449	7.30888	5.51486	5.75656	5.12977	6.14804	7.12381	6.51864	5.34028	4.40092	4.01905	5.06735	5.94475	5.83733	4.59383	4.72456	3.89217	4.87157	5.21884	5.51141	-0.352812	-1.89501	-1.73673	-0.834873	-1.08973	-1.47155	-0.178233	-0.539374	-0.626012	0.245814	0.089316	-0.790238	-0.746446	0.323647	-0.12688	-0.195775	-0.725919	-0.325926	-0.568213	0.863021	0.499132	-0.441589	-0.815235	0.464312
13480638	AT4G01703	3.01055	3.77665	3.12714	4.39195	3.33511	4.26044	3.44631	3.84085	3.2	4.0222	3.25032	3.17241	3.59433	3.56387	3.42909	3.65179	3.81994	4.74055	4.37016	3.49725	3.7828	3.60103	3.67936	3.71484	0.583787	-0.212783	0.301945	-0.740153	0.484823	0.480109	0.435767	0.064192	0.072856	-0.369746	-0.084797	-1.08804	0.775826	-0.066622	0.353708	-0.05076	-0.140575	-1.02572	0.340059	-0.130814	0.280852	0.318986	-0.055778	0.062322
13480899	AT4G02380	9.85974	8.9089	8.6972	9.56367	7.54899	7.68776	9.77153	9.6049	9.71036	9.92909	7.78429	9.12689	10.0739	9.96097	10.2996	10.8427	8.82663	9.29334	10.7274	10.7451	10.4908	11.3369	8.98085	9.57798	0.2142	1.05207	1.60238	1.27903	1.27764	1.60559	-0.088213	0.696003	1.01316	0.365416	0.235302	1.43913	0.65343	0.7841	0.19126	0.49421	0.154226	0.284641	0.741643	0.088097	-0.821904	0.128794	-0.081076	-1.15449
13481168	AT4G02890	7.12515	6.8018	6.57132	6.52494	7.06909	7.22083	6.6469	6.99591	6.4736	6.40091	7.29983	7.26457	5.45816	5.12891	5.55392	4.60266	6.32282	6.43028	6.3076	5.83503	6.14795	5.21492	6.16395	6.96989	-1.667	-1.67288	-1.01739	-1.92229	-0.746264	-0.790551	-0.478256	0.194113	-0.097717	-0.124028	0.230743	0.043737	0.849442	0.706118	0.59403	0.612264	-0.158871	0.53961	1.3277	0.512005	0.691747	0.736292	-0.389614	0.495873
13481367	AT4G03360	5.11902	4.65711	4.54386	5.09709	4.93503	4.6851	5.05294	4.90374	4.74201	4.89583	4.66974	5.10304	5.09697	5.0649	5.00836	5.48356	5.15102	5.1092	6.22951	5.48173	5.69751	5.34076	5.9663	5.86067	-0.022049	0.407783	0.464507	0.386468	0.215987	0.424103	-0.06608	0.246621	0.198153	-0.201262	-0.26529	0.417938	1.13254	0.416833	0.689151	-0.1428	0.815287	0.751475	1.19862	0.170212	0.490998	0.058462	1.08058	0.333537
13481467	AT4G03510	7.07231	7.18291	6.96326	6.31521	6.63077	6.06036	7.04688	6.88788	6.16632	6.27313	5.58594	5.73618	5.40673	5.02152	4.56982	4.04051	4.10019	4.29547	4.69097	4.71956	4.54814	4.19075	4.11953	4.27844	-1.66558	-2.16138	-2.39344	-2.2747	-2.53058	-1.76489	-0.02544	-0.295024	-0.796943	-0.042084	-1.04484	-0.324186	-0.715759	-0.301962	-0.021678	0.150238	0.019339	-0.017035	-0.690319	-0.006938	0.775265	0.192322	1.06418	0.307151
13481609	AT4G04632	3.29188	2.92211	3.90015	3.4666	3.63673	3.15633	2.88754	4.32358	2.69948	2.93362	3.18057	3.34255	3.38589	3.39932	3.10948	3.666	4.0288	2.86144	4.60928	3.35783	3.53796	4.59495	3.36355	3.46252	0.094004	0.477206	-0.790667	0.199394	0.39207	-0.2949	-0.404343	1.40146	-1.20067	-0.532982	-0.456165	0.186218	1.22339	-0.041494	0.428478	0.928957	-0.665246	0.601083	1.62773	-1.44296	1.62915	1.46194	-0.209081	0.414865
13481619	AT4G04690	4.65806	4.22695	4.61155	5.4361	3.54096	4.3066	4.18334	4.47422	4.56642	3.88751	4.46288	5.06313	5.21508	4.61906	4.09963	4.2264	4.36912	4.49189	4.48497	4.04144	4.12148	4.0322	4.2442	4.74594	0.55702	0.392102	-0.511921	-1.20969	0.828157	0.185288	-0.474717	0.247268	-0.045136	-1.54859	0.92192	0.756529	-0.730105	-0.577612	0.021842	-0.194206	-0.124919	0.25405	-0.255388	-0.82488	0.066978	1.35438	-1.04684	-0.502479
13481868	AT4G05110	3.21697	2.48564	3.21601	3.24709	4.08224	4.82795	3.05586	2.81147	3.01052	3.89665	3.31614	4.08894	3.88431	3.10167	3.03022	2.86349	5.31819	3.80218	2.82072	2.86486	3.36306	2.7272	4.23891	3.76974	0.66734	0.616031	-0.185787	-0.383597	1.23595	-1.02576	-0.161116	0.325825	-0.205481	0.649567	-0.766096	-0.739002	-1.06359	-0.236817	0.332843	-0.136287	-1.07928	-0.032447	-0.902474	-0.562642	0.538324	-0.785854	-0.313183	0.706555
13481974	AT4G05475	3.59343	3.64302	3.82013	3.66022	3.90032	4.09923	3.65447	3.50636	3.74852	3.59124	3.88242	3.55069	5.29372	4.89293	4.51033	4.18976	5.13844	5.00617	4.01788	3.6399	4.86522	3.65564	4.0292	4.26931	1.70029	1.24991	0.690201	0.529543	1.23813	0.906935	0.061044	-0.136662	-0.071611	-0.06898	-0.017894	-0.548546	-1.27584	-1.25303	0.354888	-0.534122	-1.10925	-0.736857	-1.33688	-1.11637	0.426499	-0.465142	-1.09135	-0.188311
13482119	AT4G07960	4.93124	4.6397	4.46237	4.4119	4.94238	4.42484	4.72968	4.1534	4.2762	4.44402	4.58717	4.25936	5.69081	4.93817	4.79065	5.2801	4.90702	4.94101	4.73448	4.74895	5.35676	4.71379	4.70837	4.60859	0.75958	0.298474	0.328279	0.868199	-0.035355	0.516173	-0.20156	-0.486294	-0.186174	0.03212	-0.355206	-0.16548	-0.956335	-0.189224	0.56611	-0.56631	-0.198652	-0.332416	-0.754775	0.29707	0.752284	-0.59843	0.156554	-0.166936
13482225	AT4G08406	2.94353	2.94017	3.06488	2.81683	2.93363	2.62979	2.68729	2.68514	2.92573	2.68514	2.62179	2.9544	3.8938	2.88678	3.31747	3.26791	3.18455	2.8274	2.81144	3.53304	2.76668	3.59696	2.78815	2.94017	0.950274	-0.053392	0.252585	0.451086	0.250923	0.197609	-0.256234	-0.255033	-0.139147	-0.131688	-0.311838	0.324612	-1.08236	0.64626	-0.55079	0.329054	-0.396405	0.11277	-0.826124	0.901293	-0.411643	0.460742	-0.084567	-0.211842
13482229	AT4G08430	5.05992	4.79673	4.85268	4.73393	4.19032	5.28239	4.72949	5.25368	4.49209	5.49614	5.1389	4.38335	4.50716	4.33185	5.11952	5.66053	4.77412	4.97963	5.14505	4.86321	5.08064	4.33282	5.77654	4.63441	-0.552761	-0.464882	0.26684	0.926595	0.583794	-0.302767	-0.330424	0.456955	-0.360589	0.762209	0.948578	-0.899041	0.637896	0.531366	-0.038882	-1.32771	1.00242	-0.345222	0.96832	0.074411	0.321707	-2.08992	0.053842	0.553819
13482542	AT4G09649	7.72038	8.32624	7.57753	7.05578	7.75977	8.3088	7.44037	8.52002	6.83733	7.52377	7.60719	6.73058	5.52328	6.17057	6.43802	5.75384	6.48476	6.89151	6.81086	5.52078	4.46944	5.744	7.17688	6.68379	-2.19711	-2.15567	-1.1395	-1.30194	-1.27501	-1.41729	-0.280016	0.193777	-0.740199	0.467987	-0.152583	-1.57822	1.28758	-0.649799	-1.96858	-0.009841	0.692119	-0.207714	1.5676	-0.843576	-1.22838	-0.477828	0.844702	1.37051
[truncated: 380 more rows]
[truncated: 26 more columns]

## Sheet: 4h
Affymetrix ST 1.0 Probe	New locus	2h Col-0 Mock	4h Col-0 Mock	8h Col-0 Mock	16h Col-0 Mock	24h Col-0 Mock	48h Col-0 Mock	2h Col-0 Pst	4h Col-0 Pst	8h Col-0 Pst	16h Col-0 Pst	24h Col-0 Pst	48h Col-0 Pst	2h C24 Mock	4h C24 Mock	8h C24 Mock	16h C24 Mock	24h C24 Mock	48h C24 Mock	2h C24 Pst	4h C24 Pst	8h C24 Pst	16h C24 Pst	24h C24 Pst	48h C24 Pst	2h C24 Mock - Col-0 Mock	4h C24 Mock - Col-0 Mock	8h C24 Mock - Col-0 Mock	16h C24 Mock - Col-0 Mock	24h C24 Mock - Col-0 Mock	48h C24 Mock - Col-0 Mock	2h Col-0 Pst - Mock	4h Col-0 Pst - Mock	8h Col-0 Pst - Mock	16h Col-0 Pst - Mock	24h Col-0 Pst - Mock	48h Col-0 Pst - Mock	2h C24 Pst - Mock	4h C24 Pst - Mock	8h C24 Pst - Mock	16h C24 Pst - Mock	24h C24 Pst - Mock	48h C24 Pst - Mock	2h C24 Pst - Col-0 Pst (each Mock subtracted)	4h C24 Pst - Col-0 Pst (each Mock subtracted)	8h C24 Pst - Col-0 Pst (each Mock subtracted)	16h C24 Pst - Col-0 Pst (each Mock subtracted)	24h C24 Pst - Col-0 Pst (each Mock subtracted)	48h C24 Pst - Col-0 Pst (each Mock subtracted)
[truncated: 1,282 more rows]
[truncated: 26 more columns]

[truncated: 4 more sheets: 8h, 16h, 24h, 48h]
