# Supplementary material for: Transcriptomic and Metabolomic Analysis of a Pseudomonas-Resistant versus a Susceptible Arabidopsis Accession
Source: Int J Mol Sci. 2022 Oct 11;23(20):12087. doi: 10.3390/ijms232012087 (PMC9603445; doi:10.3390/ijms232012087)
Supplement: Supplementary file 1 [file ijms-23-12087-s001.zip › Supplementary Table S9 Metabolite checklist.xlsx]

## Sheet: GCMS
Supplemental Table 1. Metabolite Reporting Checklist:
Level	Aspect	Information	Fill in
general aspect	Type of metabolome analysis	targeted metabolite analysis	TRUE
		non-targeted metabolite class scale profiling	FALSE
		non-targeted metabolome scale profiling	FALSE
		non-targeted finger printing of mass features	FALSE
	Type of quantification	absolute or quantification	Relative quantification
	Type of reference samples	chemcially defined	standard reference compounds aquired in chemical companies
		biologically defined	-
	Type of replication	analytical (same analytical sample preparation)	1
		technological (same biological preparation)	6
		biological (same experimental condition)	1
		full experiment	6
	Type of technology	reference publication	Lisec et al (2006)
	Sample preparation	method of sample preparation	chemical derivatized
		method of chromatography/separation	Lisec et al (2006)
		method of ionization	- 70 MeVolt hard ionization
		method of detection	electron impact ionization
metabolite/mass feature	Metabolite	metabolite name	see overview table
		metabolite sum formula	see overview table
		metabolite structure and public source of metabolite identifier	Metabolites were identified in comparison to database entries of authentic standards (Kopka et al., 2005; Schauer et al., 2005).
	Identification	identification process	manually supervized with R TargetSearch package (Cuadros-Inostroza et al., 2009)
		by authentic mass isotopomer added to one or all biological sample(s)	FALSE
		by authentic reference compound within a co-processed reference mixture	FALSE
		by authentic reference compound previously mapped to the analytical system	TRUE
		reference library	Metabolites were identified in comparison to database entries of authentic standards (Kopka et al., 2005; Schauer et al., 2005)
		type of mass spectrum
		by match of molecular mass (single mass fragment)	1 unique mass fragment was required for the relative quantification of metabolite pool sizes
		by match of fragments	YES
		by match of fragmentation pattern	YES
		by match of mass spectrum to reference library	Mass spectral matching thresholds were: Match > 650 (best match = 1000) and RI-deviation < 1.0%
		type of retention index
		by match of retention time (index) to reference library	fatty acid methylesters (FAMEs)
	Quantification	type of quantification	relative quantification by internal standard and sample fresh weight
	Validity testing	Recovery testing (chemical analog)	not performed
		Recovery testing (internally added mass isotopomer)	not performed
		Recovery testing (mixture of most divergent samples from the experiment)	not performed
		Test for linear range	not performed
		Limit of quantification (LOQ)	not performed
		Limit of detection (LOD)	not performed

## Sheet: LCMS
Supplemental Table 1. Metabolite Reporting Checklist:
Level	Aspect	Information	Fill in
general aspect	Type of metabolome analysis	targeted metabolite analysis	FALSE
		non-targeted metabolite class scale profiling	TRUE
		non-targeted metabolome scale profiling	TRUE
		non-targeted finger printing of mass features	TRUE
	Type of quantification	absolute or quantification	Relative quantification
	Type of reference samples	chemcially defined	standard reference compounds aquired in chemical companies
		biologically defined	-
	Type of replication	analytical (same analytical sample preparation)	1
		technological (same biological preparation)	6
		biological (same experimental condition)	1
		full experiment	6
	Type of technology	reference publication	Hummel et al (2011)
	Sample preparation	method of sample preparation	chemical derivatized
		method of chromatography/separation	Hummel et al (2011)
		method of ionization	ESI negative and positive
		method of detection	FT-MS, Exactive
metabolite/mass feature	Metabolite	metabolite name	see overview table
		metabolite sum formula	see overview table
		metabolite structure and public source of metabolite identifier	Metabolites were identified in comparison to public database entries
	Identification	identification process	manually supervized
		by authentic mass isotopomer added to one or all biological sample(s)	FALSE
		by authentic reference compound within a co-processed reference mixture	FALSE
		by authentic reference compound previously mapped to the analytical system	TRUE
		reference library	Metabolites were identified in comparison to public database entries
		type of mass spectrum	MS/MS
		by match of molecular mass (single mass fragment)	YES
		by match of fragments	YES
		by match of fragmentation pattern	YES
		by match of mass spectrum to reference library
		type of retention index	NA
		by match of retention time (index) to reference library	NA
	Quantification	type of quantification	relative quantification by internal standard and sample fresh weight
	Validity testing	Recovery testing (chemical analog)	not performed
		Recovery testing (internally added mass isotopomer)	not performed
		Recovery testing (mixture of most divergent samples from the experiment)	not performed
		Test for linear range	not performed
		Limit of quantification (LOQ)	not performed
		Limit of detection (LOD)	not performed
