# Supplementary material for: Transcriptomic and Metabolomic Analysis of a Pseudomonas-Resistant versus a Susceptible Arabidopsis Accession
Source: Int J Mol Sci. 2022 Oct 11;23(20):12087. doi: 10.3390/ijms232012087 (PMC9603445; doi:10.3390/ijms232012087)
Supplement: Supplementary file 1 [file ijms-23-12087-s001.zip › Supplementary Table S10 Metabolite documentation.xlsx]

## Sheet: GCMS
GC-MS metabolites
	A	B	C	D	E	F	G	H	I	J	K	L	M	N	O	P	Q	R	S	T
1
2	Experiment title:	Arabidopsis-Pseudomonas interactions
3	Organism/Plant species:	Arabidopsis thaliana
4	Organ/tissue:	rosette
5	Analytical tool:	GCMS
6
7	Peak no.- number referenced back to the main text
8	Ret . Time- Retention time, in minutes (difference in Ret.Time between ES(+) and ES(-) modes was less than XX minutes)
9	Putative Name- putative identification of the metabolite
10	Mol. Formula- molecular formula of the metabolite or its FA adduct;
11	Theor. m/z- theoretical monoisotopic mass calculated for the ion (M-H)- , (M+H)+ or (M+FA)-
12	Found m/z- mass detected in the experiment
13	m/z error (ppm)- difference between theoretical and found m/z values in ppm
14	MSMS fragments- fragments, obtained from the ion (M-H)- , (M+H)+ or (M+FA)-
15	MS/MS CE (eV)- collision energy used for fragmentation optional
16	UV/Vis- UV/ Vis absorbance maxima
17	() FA- formic acid adduct
18	(S)- identification confirmed by a standard compound
19	I, II, III- different isomers
20	Identification level (A; B; C)- (A) standard or NMR; (B(i)) confident match based on MS/MS and (B(ii)) confident match using in-silico MS/MS approaches and (B(iii)) partial match based on MS/MS and (C(i)) confident match based on MSn and (C(ii)) confident match using in-silico MSn approaches and (C(iii)) partial match based on MSn; (D) MS only
21	International identifie (*optional): identifier from database such such as: HMDB, KEGG, PubChem, KNApSAcK, ect.
22
23	Peak no.	Ret. Time	Putative metabolite name	Coresponding Metabolite in Literature	Metabolite Class	Mol formula	ES(+) Theor m/z	ES(+) Found m/z	ES(-) Theor m/z	ES(-) Found m/z	m/z error (ppm)	MS/MS ES(+) fragments	MS/MS ES(+) CE (eV)	MS/MS ES(-) fragments	MS/MS ES(-) CE (eV)	UV/Vis	Species detected before	References	Identification level (A-D)	International identifier*
24	1	NA	1,6-Anhydro-beta-D-glucose (3TMS)	_	_	NA	_	_	_	_	NA	_	204	_	_	(-)	Arabidopsis	knapsak	A	5280805
25	2	NA	2-Oxoglutaric acid	_	_	NA	_	_	_	_	NA	_	198	_	_		Arabidopsis	knapsak	A	452110
26	3	NA	4-Aminobutyric acid (3TMS)	_	_	NA	_	_	_	_	NA	_	174	_	_		Arabidopsis	knapsak	A
27	4	NA	4-hydroxy-benzoic acid (2TMS)	_	_	NA	_	_	_	_	NA	_	223	_	_		Arabidopsis	knapsak	A
28	5	NA	Adenine (2TMS)	_	_	NA	_	_	_	_	NA	_	264	_	_		Arabidopsis	knapsak	A
29	6	NA	Alanine (2TMS)	_	_	NA	_	_	_	_	NA	_	116	_	_		Arabidopsis	knapsak	A
30	7	NA	Altrose (1MEOX) (5TMS) MP	_	_	NA	_	_	_	_	NA	_	160	_	_		Arabidopsis	knapsak	A
31	8	NA	Arabinose (1MEOX) (4TMS) MP	_	_	NA	_	_	_	_	NA	_	103	_	_		Arabidopsis	knapsak	A
32	9	NA	Arabitol (5TMS)	_	_	NA	_	_	_	_	NA	_	307	_	_		Arabidopsis	knapsak	A
33	10	NA	Ascorbic acid (4TMS)	_	_	NA	_	_	_	_	NA	_	332	_	_		Arabidopsis	knapsak	A
34	11	NA	Asparagine (3TMS)	_	_	NA	_	_	_	_	NA	_	116	_	_		Arabidopsis	knapsak	A
35	12	NA	Aspartic acid (3TMS)	_	_	NA	_	_	_	_	NA	_	232	_	_		Arabidopsis	knapsak	A
36	13	NA	Benzoic acid (2TMS)	_	_	NA	_	_	_	_	NA	_	105	_	_		Arabidopsis	knapsak	A
37	14	NA	beta-alanine (3TMS)	_	_	NA	_	_	_	_	NA	_	174	_	_		Arabidopsis	knapsak	A
38	15	NA	Butanoic acid, 2-amino- (2TMS)	_	_	NA	_	_	_	_	NA	_	130	_	_		Arabidopsis	knapsak	A
39	16	NA	Citramalic acid (3TMS)	_	_	NA	_	_	_	_	NA	_	247	_	_		Arabidopsis	knapsak	A
40	17	NA	Citric acid (4TMS)	_	_	NA	_	_	_	_	NA	_	273	_	_		Arabidopsis	knapsak	A
41	18	NA	Citrulline or Arginine	_	_	NA	_	_	_	_	NA	_	157	_	_		Arabidopsis	knapsak	A
42	19	NA	Cysteine (3TMS)	_	_	NA	_	_	_	_	NA	_	100	_	_		Arabidopsis	knapsak	A
43	20	NA	Dehydroascorbic acid dimer (2MEOX) MP	_	_	NA	_	_	_	_	NA	_	173	_	_		Arabidopsis	knapsak	A
44	21	NA	Docosanoic acid (1TMS)	_	_	NA	_	_	_	_	NA	_	117	_	_		Arabidopsis	knapsak	A
45	22	NA	Erythritol (4TMS)	_	_	NA	_	_	_	_	NA	_	217	_	_		Arabidopsis	knapsak	A
46	23	NA	Fructose (1MEOX) (5TMS) MP	_	_	NA	_	_	_	_	NA	_	217	_	_		Arabidopsis	knapsak	A
47	24	NA	Fucose (1MEOX) (4TMS) MP	_	_	NA	_	_	_	_	NA	_	117	_	_		Arabidopsis	knapsak	A
48	25	NA	Fumaric acid (2TMS)	_	_	NA	_	_	_	_	NA	_	143	_	_		Arabidopsis	knapsak	A
49	26	NA	Galactinol (9TMS)	_	_	NA	_	_	_	_	NA	_	204	_	_		Arabidopsis	knapsak	A
50	27	NA	Galactose, 3,6-anhydro- (1MEOX) (3TMS)	_	_	NA	_	_	_	_	NA	_	129	_	_		Arabidopsis	knapsak	A
51	28	NA	Gluconic acid (6TMS)	_	_	NA	_	_	_	_	NA	_	292	_	_		Arabidopsis	knapsak	A
52	29	NA	Glucose (1MEOX) (5TMS) BP	_	_	NA	_	_	_	_	NA	_	160	_	_		Arabidopsis	knapsak	A
53	30	NA	Glucose-6-phosphate (1MEOX) (6TMS) MP	_	_	NA	_	_	_	_	NA	_	160	_	_		Arabidopsis	knapsak	A
54	31	NA	Glutamine (3TMS)	_	_	NA	_	_	_	_	NA	_	156	_	_		Arabidopsis	knapsak	A
55	32	NA	Glutamine [-H2O] (3TMS) MP	_	_	NA	_	_	_	_	NA	_	154	_	_		Arabidopsis	knapsak	A
56	33	NA	Glutaric acid (2TMS)	_	_	NA	_	_	_	_	NA	_	116	_	_		Arabidopsis	knapsak	A
57	34	NA	Glyceric acid (3TMS)	_	_	NA	_	_	_	_	NA	_	189	_	_		Arabidopsis	knapsak	A
58	35	NA	Glycerol (3TMS)	_	_	NA	_	_	_	_	NA	_	117	_	_		Arabidopsis	knapsak	A
59	36	NA	Glycerol-3-phosphate (4TMS)	_	_	NA	_	_	_	_	NA	_	299	_	_		Arabidopsis	knapsak	A
60	37	NA	Glycine (2TMS)	_	_	NA	_	_	_	_	NA	_	102	_	_		Arabidopsis	knapsak	A
61	38	NA	Glycine (3TMS)	_	_	NA	_	_	_	_	NA	_	174	_	_		Arabidopsis	knapsak	A
62	39	NA	Guanidine (3TMS)	_	_	NA	_	_	_	_	NA	_	146	_	_		Arabidopsis	knapsak	A
63	40	NA	Hexacosanoic acid (1TMS)	_	_	NA	_	_	_	_	NA	_	117	_	_		Arabidopsis	knapsak	A
64	41	NA	Histidine (3TMS)	_	_	NA	_	_	_	_	NA	_	154	_	_		Arabidopsis	knapsak	A
65	42	NA	Homoserine (3TMS)	_	_	NA	_	_	_	_	NA	_	128	_	_		Arabidopsis	knapsak	A
66	43	NA	Hydroxyproline (3TMS)	_	_	NA	_	_	_	_	NA	_	140	_	_		Arabidopsis	knapsak	A
67	44	NA	Indole-3-acetonitrile (1TMS)	_	_	NA	_	_	_	_	NA	_	228	_	_		Arabidopsis	knapsak	A
68	45	NA	Isoleucine (2TMS)	_	_	NA	_	_	_	_	NA	_	158	_	_		Arabidopsis	knapsak	A
69	46	NA	Isopropyl-beta-D-thiogalactoside (4TMS)	_	_	NA	_	_	_	_	NA	_	147	_	_		Arabidopsis	knapsak	A
70	47	NA	Leucine (2TMS)	_	_	NA	_	_	_	_	NA	_	158	_	_		Arabidopsis	knapsak	A
71	48	NA	Maleic acid (2TMS)	_	_	NA	_	_	_	_	NA	_	147	_	_		Arabidopsis	knapsak	A
72	49	NA	Malic acid (3TMS)	_	_	NA	_	_	_	_	NA	_	233	_	_		Arabidopsis	knapsak	A
73	50	NA	Maltose (1MEOX) (8TMS) BP	_	_	NA	_	_	_	_	NA	_	204	_	_		Arabidopsis	knapsak	A
74	51	NA	Mannose (major)	_	_	NA	_	_	_	_	NA	_	160	_	_		Arabidopsis	knapsak	A
75	52	NA	Methionine (2TMS)	_	_	NA	_	_	_	_	NA	_	128	_	_		Arabidopsis	knapsak	A
76	53	NA	myo-Inositol (6TMS)	_	_	NA	_	_	_	_	NA	_	305	_	_		Arabidopsis	knapsak	A
77	54	NA	Nicotinic acid (1TMS)	_	_	NA	_	_	_	_	NA	_	180	_	_		Arabidopsis	knapsak	A
78	55	NA	O-acetyl-serine (2TMS)	_	_	NA	_	_	_	_	NA	_	116	_	_		Arabidopsis	knapsak	A
79	56	NA	Octacosanoic acid (1TMS)	_	_	NA	_	_	_	_	NA	_	117	_	_		Arabidopsis	knapsak	A
80	57	NA	Octadecanoic acid (1TMS)	_	_	NA	_	_	_	_	NA	_	117	_	_		Arabidopsis	knapsak	A
81	58	NA	Ornithine (4TMS)	_	_	NA	_	_	_	_	NA	_	142	_	_		Arabidopsis	knapsak	A
82	59	NA	Palmitic acid	_	_	NA	_	_	_	_	NA	_	313	_	_		Arabidopsis	knapsak	A
83	60	NA	Phenylalanine (2TMS)	_	_	NA	_	_	_	_	NA	_	218	_	_		Arabidopsis	knapsak	A
84	61	NA	Phosphoric acid (3TMS)	_	_	NA	_	_	_	_	NA	_	299	_	_		Arabidopsis	knapsak	A
85	62	NA	Proline (2TMS)	_	_	NA	_	_	_	_	NA	_	142	_	_		Arabidopsis	knapsak	A
86	63	NA	Putrescine (4TMS)	_	_	NA	_	_	_	_	NA	_	174	_	_		Arabidopsis	knapsak	A
87	64	NA	Pyroglutamic acid (2TMS)	_	_	NA	_	_	_	_	NA	_	230	_	_		Arabidopsis	knapsak	A
88	65	NA	Pyruvic acid (1MEOX) (1TMS)	_	_	NA	_	_	_	_	NA	_	174	_	_		Arabidopsis	knapsak	A
89	66	NA	Raffinose	_	_	NA	_	_	_	_	NA	_	217	_	_		Arabidopsis	knapsak	A
90	67	NA	Ribonic acid (5TMS)	_	_	NA	_	_	_	_	NA	_	292	_	_		Arabidopsis	knapsak	A
91	68	NA	Ribose (1MEOX) (4TMS) MP	_	_	NA	_	_	_	_	NA	_	103	_	_		Arabidopsis	knapsak	A
92	69	NA	Serine (3TMS)	_	_	NA	_	_	_	_	NA	_	204	_	_		Arabidopsis	knapsak	A
93	70	NA	Serine (4TMS)	_	_	NA	_	_	_	_	NA	_	114	_	_		Arabidopsis	knapsak	A
94	71	NA	Shikimic acid (4TMS)	_	_	NA	_	_	_	_	NA	_	204	_	_		Arabidopsis	knapsak	A
95	72	NA	Similar to cellobiose (1MEOX) (8TMS) MP	_	_	NA	_	_	_	_	NA	_	204	_	_		Arabidopsis		B
96	73	NA	Similar to L-Glutamine	_	_	NA	_	_	_	_	NA	_	190	_	_		Arabidopsis		B
97	74	NA	Similar to Uric acid (4TMS)	_	_	NA	_	_	_	_	NA	_	441	_	_		Arabidopsis		B
98	75	NA	Similar to Uridine-5-diphosphoglucose disodium salt	_	_	NA	_	_	_	_	NA	_	217	_	_		Arabidopsis	knapsak	A
99	76	NA	Sinapic acid (cis)	_	_	NA	_	_	_	_	NA	_	338	_	_		Arabidopsis	knapsak	A
100	77	NA	Sinapic acid (trans)	_	_	NA	_	_	_	_	NA	_	338	_	_		Arabidopsis	knapsak	A
101	78	NA	Sorbose (1MEOX) (5TMS) BP	_	_	NA	_	_	_	_	NA	_	217	_	_		Arabidopsis	knapsak	A
102	79	NA	Spermidine (5TMS)	_	_	NA	_	_	_	_	NA	_	144	_	_		Arabidopsis	knapsak	A
103	80	NA	Succinic acid (2TMS)	_	_	NA	_	_	_	_	NA	_	247	_	_		Arabidopsis	knapsak	A
104	81	NA	Sucrose (8TMS)	_	_	NA	_	_	_	_	NA	_	319	_	_		Arabidopsis	knapsak	A
105	82	NA	Tetracosanoic acid (1TMS)	_	_	NA	_	_	_	_	NA	_	117	_	_		Arabidopsis	knapsak	A
106	83	NA	Tetradecanoic acid (1TMS)	_	_	NA	_	_	_	_	NA	_	285	_	_		Arabidopsis	knapsak	A
107	84	NA	Threonic acid (4TMS)	_	_	NA	_	_	_	_	NA	_	292	_	_		Arabidopsis	knapsak	A
108	85	NA	Threonine (3TMS)	_	_	NA	_	_	_	_	NA	_	117	_	_		Arabidopsis	knapsak	A
109	86	NA	Trehalose, alpha,alpha'-, D- (8TMS)	_	_	NA	_	_	_	_	NA	_	361	_	_		Arabidopsis	knapsak	A
110	87	NA	Tryptophan (3TMS)	_	_	NA	_	_	_	_	NA	_	202	_	_		Arabidopsis	knapsak	A
111	88	NA	Tyramine (3TMS)	_	_	NA	_	_	_	_	NA	_	174	_	_		Arabidopsis	knapsak	A
112	89	NA	Tyrosine (3TMS)	_	_	NA	_	_	_	_	NA	_	218	_	_		Arabidopsis	knapsak	A
113	90	NA	Unknown (sugar) 20	_	_	NA	_	_	_	_	NA	_	147	_	_		Arabidopsis	_	B
114	91	NA	Unknown 01	_	_	NA	_	_	_	_	NA	_	281	_	_		Arabidopsis	_	B
115	92	NA	Unknown 02	_	_	NA	_	_	_	_	NA	_	147	_	_		Arabidopsis	_	B
116	93	NA	Unknown 03	_	_	NA	_	_	_	_	NA	_	234	_	_		Arabidopsis	_	B
117	94	NA	Unknown 04	_	_	NA	_	_	_	_	NA	_	143	_	_		Arabidopsis	_	B
118	95	NA	Unknown 06	_	_	NA	_	_	_	_	NA	_	281	_	_		Arabidopsis	_	B
119	96	NA	Unknown 08	_	_	NA	_	_	_	_	NA	_	392	_	_		Arabidopsis	_	B
120	97	NA	Unknown 11 (RI 712900)	_	_	NA	_	_	_	_	NA	_	204	_	_		Arabidopsis	_	B
121	98	NA	Unknown 12	_	_	NA	_	_	_	_	NA	_	191	_	_		Arabidopsis	_	B
122	99	NA	Unknown 13	_	_	NA	_	_	_	_	NA	_	204	_	_		Arabidopsis	_	B
123	100	NA	Unknown 16	_	_	NA	_	_	_	_	NA	_	204	_	_		Arabidopsis	_	B
124	101	NA	Unknown 17	_	_	NA	_	_	_	_	NA	_	217	_	_		Arabidopsis	_	B
125	102	NA	Unknown 18	_	_	NA	_	_	_	_	NA	_	147	_	_		Arabidopsis	_	B
126	103	NA	Unknown 284200	_	_	NA	_	_	_	_	NA	_	86	_	_		Arabidopsis	_	B
127	104	NA	Unknown 521800	_	_	NA	_	_	_	_	NA	_	275	_	_		Arabidopsis	_	B
128	105	NA	Unknown 640400	_	_	NA	_	_	_	_	NA	_	331	_	_		Arabidopsis	_	B
129	106	NA	Uracil (2TMS)	_	_	NA	_	_	_	_	NA	_	99	_	_		Arabidopsis	knapsak	A
130	107	NA	Valine (2TMS)	_	_	NA	_	_	_	_	NA	_	144	_	_		Arabidopsis	knapsak	A

## Sheet: LCMS
UPLC-FT-MS metabolites
	A	B	C	D	E	F	G	H	I	J	K	L	M	N	O	P	Q	R	S	T
1
2	Experiment title:	Arabidopsis-Pseudomonas interactions
3	Organism/Plant species:	Arabidopsis thaliana
4	Organ/tissue:	rosette
5	Analytical tool:	LC-HRMS
6
7	Peak no.- number referenced back to the main text
8	Ret . Time- Retention time, in minutes (difference in Ret.Time between ES(+) and ES(-) modes was less than XX minutes)
9	Putative Name- putative identification of the metabolite
10	Mol. Formula- molecular formula of the metabolite or its FA adduct;
11	Theor. m/z- theoretical monoisotopic mass calculated for the ion (M-H)- , (M+H)+ or (M+FA)-
12	Found m/z- mass detected in the experiment
13	m/z error (ppm)- difference between theoretical and found m/z values in ppm
14	MSMS fragments- fragments, obtained from the ion (M-H)- , (M+H)+ or (M+FA)-
15	MS/MS CE (eV)- collision energy used for fragmentation optional
16	UV/Vis- UV/ Vis absorbance maxima
17	() FA- formic acid adduct
18	(S)- identification confirmed by a standard compound
19	I, II, III- different isomers
20	Identification level (A; B; C)- (A) standard or NMR; (B(i)) confident match based on MS/MS and (B(ii)) confident match using in-silico MS/MS approaches and (B(iii)) partial match based on MS/MS and (C(i)) confident match based on MSn and (C(ii)) confident match using in-silico MSn approaches and (C(iii)) partial match based on MSn; (D) MS only
21	International identifie (*optional): identifier from database such such as: HMDB, KEGG, PubChem, KNApSAcK, ect.
22
23	Peak no.	Ret. Time	Putative metabolite name	Coresponding Metabolite in Literature	Metabolite Class	Mol formula	ES(+) Theor m/z	ES(+) Found m/z	ES(-) Theor m/z	ES(-) Found m/z	m/z error (ppm)	MS/MS ES(+) fragments	MS/MS ES(+) CE (eV)	MS/MS ES(-) fragments	MS/MS ES(-) CE (eV)	UV/Vis	Species detected before	References	Identification level (A-D)	International identifier*
24	pol_neg_1003	_	| | D-Aspartic acid OR Iminodiacetic acid	_	_	_	_	_	_	_	_	_	_	_	_		Arabidopsis;	knapsak | PubChem | TARTARUS	B(i)
25	pol_neg_10291	_	C00007356: 8-Methylthio-octyl glucosinolate | C17254: 8-Methylthiooctyl glucosinolate |	_	_	_	_	_	_	_	_	_	_	_	_		Arabidopsis;	knapsak | PubChem | TARTARUS	B(i)	C0000735
26	pol_neg_10334	_	C00000126: Neoglucobrassicin;1-Methoxy-3-indolylmethylglucosinolate | C08423: 4-Methoxy-3-indolylmethyl glucosinolate | C08424: 1-Methoxy-3-indolylmethyl glucosinolate |	_	_	_	_	_	_	_	_	_	_	_	_		Arabidopsis;	knapsak | PubChem | TARTARUS	B(i)	C0000012
27	pol_neg_10335	_	C00000128: 4-4-Methoxyglucobrassicin;4-Methoxy-3-indolylmethylglucosinolate | C08423: 4-Methoxy-3-indolylmethyl glucosinolate | C08424: 1-Methoxy-3-indolylmethyl glucosinolate |	_	_	_	_	_	_	_	_	_	_	_	_		Arabidopsis;	knapsak | PubChem | TARTARUS	B(i)	C0000012
28	pol_neg_10369	_	C00007352: 7-(Methylsulfinyl)heptyl glucosinolate;Glucoibarin | |	_	_	_	_	_	_	_	_	_	_	_	_		Arabidopsis;	knapsak | PubChem | TARTARUS	B(i)	C0000735
29	pol_neg_10387	_	| C02466: cyclo-Triphosphoric acid, Trimetaphosphate |	_	_	_	_	_	_	_	_	_	_	_	_		Arabidopsis;	knapsak | PubChem | TARTARUS	B(i)
30	pol_neg_10444	_	C00007821: 2-(4-Methoxyphenyl)-2,2-dimethylethyl glucosinolate | |	_	_	_	_	_	_	_	_	_	_	_	_		Arabidopsis;	knapsak | PubChem | TARTARUS	B(i)	C0000782
31	pol_neg_10483	_	C00019639: CTP;Cytidine 5'-triphosphate | C00063: 65-47-4, CTP, Cytidine triphosphate |	_	_	_	_	_	_	_	_	_	_	_	_		Arabidopsis;	knapsak | PubChem | TARTARUS	B(i)	C0001963
32	pol_neg_10736	_	C00007845: 9-Methylthiononyl glucosinolate | |	_	_	_	_	_	_	_	_	_	_	_	_		Arabidopsis;	knapsak | PubChem | TARTARUS	B(i)	C0000784
33	pol_neg_10772	_	C00007355: 8-Methylsulfinyloctyl glucosinolate;Glucohirsutin | C17271: 8-Methylsulfinyloctyl glucosinolate, Glucohirsutin |	_	_	_	_	_	_	_	_	_	_	_	_		Arabidopsis;	knapsak | PubChem | TARTARUS	B(i)	C0000735
34	pol_neg_11163	_	| | Maltotriose	_	_	_	_	_	_	_	_	_	_	_	_		Arabidopsis;	knapsak | PubChem | TARTARUS	B(i)
35	pol_neg_11278	_	C00007832: 9-Methylsulfinylnonyl glucosinolate;Glucoarabin | C17272: 9-Methylsulfinylnonyl glucosinolate, Glucoarabin |	_	_	_	_	_	_	_	_	_	_	_	_		Arabidopsis;	knapsak | PubChem | TARTARUS	B(i)	C0000783
36	pol_neg_11504	_	C00018102: 1-Methylpseudouridine;NSC 240023;U 50228 | C05131: (1-Ribosylimidazole)-4-acetate | C16744: Spongothymidine |	_	_	_	_	_	_	_	_	_	_	_	_		Arabidopsis;	knapsak | PubChem | TARTARUS	B(i)	C0001810
37	pol_neg_11895	_	C00019552: 3-Phospho-D-glyceroyl phosphate | C00236: (R)-2-Hydroxy-3-(phosphonooxy)-1-monoanhydride with phosphoric propanoic acid, 3-Phospho-D-glyceroyl phosphate | C01159: 2,3-Bisphospho-D-glycerate, DPG | C03339: 2,3-Bisphosphoglycerate, Greenwald ester |	_	_	_	_	_	_	_	_	_	_	_	_		Arabidopsis;	knapsak | PubChem | TARTARUS	B(i)	C0001955
38	pol_neg_12009	_	| C00190: UDP-D-xylose, UDP-xylose | C00935: UDP-L-arabinose | C01623: UDP-apiose | C18094: UDP-beta-L-arabinofuranose |	_	_	_	_	_	_	_	_	_	_	_	_		Arabidopsis;	knapsak | PubChem | TARTARUS	B(i)
39	pol_neg_12137	_	| C13050: Cyclic ADP-ribose |	_	_	_	_	_	_	_	_	_	_	_	_		Arabidopsis;	knapsak | PubChem | TARTARUS	B(i)
40	pol_neg_12304	_	| | Maltotriose	_	_	_	_	_	_	_	_	_	_	_	_		Arabidopsis;	knapsak | PubChem | TARTARUS	B(i)
41	pol_neg_12521	_	C00007241: Phosphoribosyl-AMP | C00301: Adenosine diphosphate ribose, ADP-D-ribose | C01882: ADP-D-ribose | C02741: 1-(5-Phosphoribosyl)-AMP, N1-(5-Phospho-D-ribosyl)-AMP |	_	_	_	_	_	_	_	_	_	_	_	_		Arabidopsis;	knapsak | PubChem | TARTARUS	B(i)	C0000724
42	pol_neg_12681	_	C00001514: UDP-D-glucose;Uridine diphosphate glucose | C00007390: UDP-D-galactose;Uridinediphosphate galactose | C00029: UDP-D-glucose, UDP-glucose, Uridine diphosphate glucose | C00052: UDP-D-galactopyranose, UDP-galactose | C03733: UDP-alpha-D-galacto-1,4-furanose |	_	_	_	_	_	_	_	_	_	_	_	_		Arabidopsis;	knapsak | PubChem | TARTARUS	B(i)	C0000151
43	pol_neg_13132	_	| C03483: Adenosine 5'-tetraphosphate |	_	_	_	_	_	_	_	_	_	_	_	_		Arabidopsis;	knapsak | PubChem | TARTARUS	B(i)
44	pol_neg_13157	_	| C04175: 2-Deoxy-D-ribose 1,5-bisphosphate |	_	_	_	_	_	_	_	_	_	_	_	_		Arabidopsis;	knapsak | PubChem | TARTARUS	B(i)
45	pol_neg_1324	_	| | L-Glutamine	_	_	_	_	_	_	_	_	_	_	_	_		Arabidopsis;	knapsak | PubChem | TARTARUS	B(i)
46	pol_neg_13433	_	| C01294: 1-Guanidino-1-deoxy-scyllo-inositol 4-phosphate, N-Amidino-scyllo-inosamine 4-phosphate |	_	_	_	_	_	_	_	_	_	_	_	_		Arabidopsis;	knapsak | PubChem | TARTARUS	B(i)
47	pol_neg_13474	_	C00011153: Ellagic acid;Gallogen;Alizarin yellow;Elagostasine | C10788: Ellagic acid |	_	_	_	_	_	_	_	_	_	_	_	_		Arabidopsis;	knapsak | PubChem | TARTARUS	B(i)	C0001115
48	pol_neg_13557	_	C00011186: Malvidin 3-glucoside-pyruvate | |	_	_	_	_	_	_	_	_	_	_	_	_		Arabidopsis;	knapsak | PubChem | TARTARUS	B(i)	C0001118
49	pol_neg_13669	_	C00001577: Lycoricidinol;Narciclasine | C08533: Narciclasine |	_	_	_	_	_	_	_	_	_	_	_	_		Arabidopsis;	knapsak | PubChem | TARTARUS	B(i)	C0000157
50	pol_neg_1377	_	| | L-Glutamic acid	_	_	_	_	_	_	_	_	_	_	_	_		Arabidopsis;	knapsak | PubChem | TARTARUS	B(i)
51	pol_neg_14295	_	C00007670: 2-O-L-ramnopyranosyl-4-Deoxy-alpha-L-threo-hex-4-enopyranosiduronoic acid;Lepidimoic acid | |	_	_	_	_	_	_	_	_	_	_	_	_		Arabidopsis;	knapsak | PubChem | TARTARUS	B(i)	C0000767
52	pol_neg_14663	_	C00007256: NAD;Nicotinamide adenine dinucleotide | |	_	_	_	_	_	_	_	_	_	_	_	_		Arabidopsis;	knapsak | PubChem | TARTARUS	B(i)	C0000725
53	pol_neg_14695	_	| C00976: GDP-D-mannuronic acid |	_	_	_	_	_	_	_	_	_	_	_	_		Arabidopsis;	knapsak | PubChem | TARTARUS	B(i)
54	pol_neg_14936	_	| C18762: Pyridafenthion |	_	_	_	_	_	_	_	_	_	_	_	_		Arabidopsis;	knapsak | PubChem | TARTARUS	B(i)
55	pol_neg_15057	_	C00005968: Quercetin 3-(2''-caffeylglucuronide) | |	_	_	_	_	_	_	_	_	_	_	_	_		Arabidopsis;	knapsak | PubChem | TARTARUS	B(i)	C0000596
56	pol_neg_15315	_	C00001599: Musca-aurin-I | C08559: Musca-aurin-I |	_	_	_	_	_	_	_	_	_	_	_	_		Arabidopsis;	knapsak | PubChem | TARTARUS	B(i)	C0000159
57	pol_neg_15424	_	C00018836: Melinacidin III | |	_	_	_	_	_	_	_	_	_	_	_	_		Arabidopsis;	knapsak | PubChem | TARTARUS	B(i)	C0001883
58	pol_neg_1550	_	| C19302: 62-55-5, Thioacetamide |	_	_	_	_	_	_	_	_	_	_	_	_		Arabidopsis;	knapsak | PubChem | TARTARUS	B(i)
59	pol_neg_15563	_	C00022213: Corymbivillosol acetate | |	_	_	_	_	_	_	_	_	_	_	_	_		Arabidopsis;	knapsak | PubChem | TARTARUS	B(i)	C0002221
60	pol_neg_16012	_	| C13883: 1-Hexadecanoyl-2-(9Z-octadecenoyl)-sn-glycero-3-phospho-sn-glycerol |	_	_	_	_	_	_	_	_	_	_	_	_		Arabidopsis;	knapsak | PubChem | TARTARUS	B(i)
61	pol_neg_16476	_	C00001500: FAD;Flavin adenine dinucleotide | C00016: FAD |	_	_	_	_	_	_	_	_	_	_	_	_		Arabidopsis;	knapsak | PubChem | TARTARUS	B(i)	C0000150
62	pol_neg_16559	_	C00012127: Hirsutolide;Hirsutolide | C00012635: Nivalenol 4,15-diacetate;Nivalenol diacetate;Saubinin I;12,13-Epoxy-3a,4b,7a,15-tetrahydroxytrichothec-9-en-8-one 4,15-diacetate | |	_	_	_	_	_	_	_	_	_	_	_	_		Arabidopsis;	knapsak | PubChem | TARTARUS	B(i)	C0001212
63	pol_neg_1661	_	| | Histidine	_	_	_	_	_	_	_	_	_	_	_	_		Arabidopsis;	knapsak | PubChem | TARTARUS	B(i)
64	pol_neg_17060	_	C00005858: Kaempferol 3-(2'',3''-diacetyl-4''-(Z)-p-coumaryl-6''-(E)-p-coumarylglucoside) | C00005859: Kaempferol 3-(3'',4''-diacetyl-2'',6''-di-(E)-p-coumarylglucoside) | |	_	_	_	_	_	_	_	_	_	_	_	_		Arabidopsis;	knapsak | PubChem | TARTARUS	B(i)	C0000585
65	pol_neg_17337	_	C00022351: Hamachilobene B | C00022499: Methyl ent-16-acetoxy-6,13E-labdadien-15,17-dioate | |	_	_	_	_	_	_	_	_	_	_	_	_		Arabidopsis;	knapsak | PubChem | TARTARUS	B(i)	C0002235
66	pol_neg_17492	_	C00014734: Albiproflavone;2,2'-Bis[6,7-dihydroxy-5-(hydroxymethyl)-4-benzofuranyl]-5,5',9,9'-tetrahydroxy-[6,6'-bi-4H-naphtho[1,2-b]pyran]-4,4'-dione | |	_	_	_	_	_	_	_	_	_	_	_	_		Arabidopsis;	knapsak | PubChem | TARTARUS	B(i)	C0001473
67	pol_neg_17618	_	C00000673: Sinaiticin | C00002834: Knipholone | C10365: Knipholone |	_	_	_	_	_	_	_	_	_	_	_	_		Arabidopsis;	knapsak | PubChem | TARTARUS	B(i)	C0000067
68	pol_neg_17933	_	C00009268: Arachnitannin 1 | |	_	_	_	_	_	_	_	_	_	_	_	_		Arabidopsis;	knapsak | PubChem | TARTARUS	B(i)	C0000926
69	pol_neg_1865	_	| C00094: Sulfurous acid |	_	_	_	_	_	_	_	_	_	_	_	_		Arabidopsis;	knapsak | PubChem | TARTARUS	B(i)
70	pol_neg_18829	_	C00015870: Scirpusin B | C00016869: Bequinostatin C | |	_	_	_	_	_	_	_	_	_	_	_	_		Arabidopsis;	knapsak | PubChem | TARTARUS	B(i)	C0001587
71	pol_neg_18906	_	C00007231: CDP-choline | C00307: CDP-choline, Cytidine 5'-diphosphocholine |	_	_	_	_	_	_	_	_	_	_	_	_		Arabidopsis;	knapsak | PubChem | TARTARUS	B(i)	C0000723
72	pol_neg_19087	_	C00008921: Theaflavonin | |	_	_	_	_	_	_	_	_	_	_	_	_		Arabidopsis;	knapsak | PubChem | TARTARUS	B(i)	C0000892
73	pol_neg_19470	_	C00008658: Gericudranin D | C00009326: Guibourtinidol-(4alpha->2)-3,5,3',4'-tetrahydroxystilbene | |	_	_	_	_	_	_	_	_	_	_	_	_		Arabidopsis;	knapsak | PubChem | TARTARUS	B(i)	C0000865
74	pol_neg_19778	_	C00005656: Spinatoside | C00005779: Syringetin 3-glucuronide | C00006020: Quercetagetin 7-(6''-acetylglucoside) | |	_	_	_	_	_	_	_	_	_	_	_	_		Arabidopsis;	knapsak | PubChem | TARTARUS	B(i)	C0000565
75	pol_neg_19853	_	C00014889: FR 252922;Pseudotrienic acid A lactone | |	_	_	_	_	_	_	_	_	_	_	_	_		Arabidopsis;	knapsak | PubChem | TARTARUS	B(i)	C0001488
76	pol_neg_19887	_	| C11910: dTDP-3-amino-3,4,6-trideoxy-alpha-D-glucose | C18030: dTDP-2,6-dideoxy-D-kanosamine | C18092: dTDP-3-amino-2,3,6-trideoxy-L-ribo-hexose |	_	_	_	_	_	_	_	_	_	_	_	_		Arabidopsis;	knapsak | PubChem | TARTARUS	B(i)
77	pol_neg_20437	_	C00009248: Guibourtinidol-(4alpha->6)-catechin-8-carboxylic acid | C00009249: Guibourtinidol-(4alpha->8)-catechin-6-carboxylic acid | |	_	_	_	_	_	_	_	_	_	_	_	_		Arabidopsis;	knapsak | PubChem | TARTARUS	B(i)	C0000924
78	pol_neg_20711	_	C00022088: 3,13-Di-O-beta-D-glucopyranosilgeranyllinalol | |	_	_	_	_	_	_	_	_	_	_	_	_		Arabidopsis;	knapsak | PubChem | TARTARUS	B(i)	C0002208
79	pol_neg_2119	_	| | L-Arginine	_	_	_	_	_	_	_	_	_	_	_	_		Arabidopsis;	knapsak | PubChem | TARTARUS	B(i)
80	pol_neg_2270	_	C00001198: Oxalic acid | C00209: Ethanedioic acid, Oxalic acid |	_	_	_	_	_	_	_	_	_	_	_	_		Arabidopsis;	knapsak | PubChem | TARTARUS	B(i)	C0000119
81	pol_neg_2280	_	| | alpha-D-Talose OR Tagatose	_	_	_	_	_	_	_	_	_	_	_	_		Arabidopsis;	knapsak | PubChem | TARTARUS	B(i)
82	pol_neg_2576	_	C00018026: Alvatic acid;Calvatic acid;Calvatinic acid;NSC 264713 | |	_	_	_	_	_	_	_	_	_	_	_	_		Arabidopsis;	knapsak | PubChem | TARTARUS	B(i)	C0001802
83	pol_neg_259	_	| | Hydroxymethylphosphonic acid	_	_	_	_	_	_	_	_	_	_	_	_		Arabidopsis;	knapsak | PubChem | TARTARUS	B(i)
84	pol_neg_2803	_	| | D-Galactonic acid OR D-Gluconic acid	_	_	_	_	_	_	_	_	_	_	_	_		Arabidopsis;	knapsak | PubChem | TARTARUS	B(i)
85	pol_neg_2814	_	C00000351: (E)-2-Hexenal | C00000352: (E)-3-Hexenal | C00000353: (Z)-3-Hexenal | C00414: Cyclohexanone | C08497: (E)-2-Hexenal, trans-2-Hexenal | D07332: 77-75-8, Methylparafynol | C16310: (3Z)-Hexenal |	_	_	_	_	_	_	_	_	_	_	_	_		Arabidopsis;	knapsak | PubChem | TARTARUS	B(i)	C0000035
86	pol_neg_3022	_	| | L-Tryptophan	_	_	_	_	_	_	_	_	_	_	_	_		Arabidopsis;	knapsak | PubChem | TARTARUS	B(i)
87	pol_neg_3339	_	| C00472: 1,4-Benzoquinone, 2,5-Cyclohexadiene-1,4-dione, Chinone, p-Benzoquinone | C02351: 1,2-Benzoquinone |	_	_	_	_	_	_	_	_	_	_	_	_		Arabidopsis;	knapsak | PubChem | TARTARUS	B(i)
88	pol_neg_3411	_	C00007607: 4-Amino-2-methyl-5-phosphomethylpyrimidine;4-Amino-5-phosphomethyl-2-methylpyrimidine | C04556: 4-Amino-2-methyl-5-phosphomethylpyrimidine |	_	_	_	_	_	_	_	_	_	_	_	_		Arabidopsis;	knapsak | PubChem | TARTARUS	B(i)	C0000760
89	pol_neg_3416	_	| | Pantothenic acid (Vitamine B5)	_	_	_	_	_	_	_	_	_	_	_	_		Arabidopsis;	knapsak | PubChem | TARTARUS	B(i)
90	pol_neg_3453	_	C00002311: Alchorneine | C07402: Procarbazine | D08423: Procarbazine (INN) | C15477: CGP 28014 |	_	_	_	_	_	_	_	_	_	_	_	_		Arabidopsis;	knapsak | PubChem | TARTARUS	B(i)	C0000231
91	pol_neg_3527	_	C00000151: 2-Furoic acid | C01546: 2-Furancarboxylic acid, 2-Furoic acid |	_	_	_	_	_	_	_	_	_	_	_	_		Arabidopsis;	knapsak | PubChem | TARTARUS	B(i)	C0000015
92	pol_neg_364	_	| | 3-Cyanoalanine	_	_	_	_	_	_	_	_	_	_	_	_		Arabidopsis;	knapsak | PubChem | TARTARUS	B(i)
93	pol_neg_3643	_	| C00791: 1-Methylglycocyamidine | C19280: 3-(Methylnitrosamino)propionitrile | D03600: 60-27-5 |	_	_	_	_	_	_	_	_	_	_	_	_		Arabidopsis;	knapsak | PubChem | TARTARUS	B(i)
94	pol_neg_3685	_	| C11319: 3,5-Dinitrosalicylic acid |	_	_	_	_	_	_	_	_	_	_	_	_		Arabidopsis;	knapsak | PubChem | TARTARUS	B(i)
95	pol_neg_3819	_	C00001256: Lenthionine | C08382: 1,2,3,5,6-Pentathiepane |	_	_	_	_	_	_	_	_	_	_	_	_		Arabidopsis;	knapsak | PubChem | TARTARUS	B(i)	C0000125
96	pol_neg_3940	_	| | 3-Deoxy-D-manno-2-octulosonic acid	_	_	_	_	_	_	_	_	_	_	_	_		Arabidopsis;	knapsak | PubChem | TARTARUS	B(i)
97	pol_neg_4271	_	| C16420: 4-Acetamido-2-amino-6-nitrotoluene |	_	_	_	_	_	_	_	_	_	_	_	_		Arabidopsis;	knapsak | PubChem | TARTARUS	B(i)
98	pol_neg_4309	_	| C00404: (Phosphate)n, (Phosphate)n-1, (Polyphosphate)n-1, Polyphosphate | C00536: Triphosphate, Tripolyphosphate |	_	_	_	_	_	_	_	_	_	_	_	_		Arabidopsis;	knapsak | PubChem | TARTARUS	B(i)
99	pol_neg_4372	_	| | D-Fructose 1-phosphate OR myo-Inositol 2-phosphate	_	_	_	_	_	_	_	_	_	_	_	_		Arabidopsis;	knapsak | PubChem | TARTARUS	B(i)
100	pol_neg_4425	_	| C04690: 2-(Acetamidomethylene)-3-(hydroxymethyl)succinate |	_	_	_	_	_	_	_	_	_	_	_	_		Arabidopsis;	knapsak | PubChem | TARTARUS	B(i)
101	pol_neg_4760	_	C00010584: Jioglutin E | |	_	_	_	_	_	_	_	_	_	_	_	_		Arabidopsis;	knapsak | PubChem | TARTARUS	B(i)	C0001058
102	pol_neg_4985	_	| C19009: Oxydisulfoton |	_	_	_	_	_	_	_	_	_	_	_	_		Arabidopsis;	knapsak | PubChem | TARTARUS	B(i)
103	pol_neg_5080	_	C00001335: L-Albizziine | C08264: L-Albizziine |	_	_	_	_	_	_	_	_	_	_	_	_		Arabidopsis;	knapsak | PubChem | TARTARUS	B(i)	C0000133
104	pol_neg_5136	_	| C11536: (2R)-O-Phospho-3-sulfolactate |	_	_	_	_	_	_	_	_	_	_	_	_		Arabidopsis;	knapsak | PubChem | TARTARUS	B(i)
105	pol_neg_5351	_	| D01591: Ethyl 4-nitrophenyl ethylphosphonate (JAN) | C13048: Ethyl 4-nitrophenyl ethylphosphonate |	_	_	_	_	_	_	_	_	_	_	_	_		Arabidopsis;	knapsak | PubChem | TARTARUS	B(i)
106	pol_neg_5886	_	| C00055: 63-37-6, CMP, Cytidylic acid | C03104: 2'-Cytidylic acid, Cytidine 2'-phosphate | C05822: 3'-CMP |	_	_	_	_	_	_	_	_	_	_	_	_		Arabidopsis;	knapsak | PubChem | TARTARUS	B(i)
107	pol_neg_5893	_	C00007576: Indole-3-carboxylic acid beta-D-glucopyranosyl ester | |	_	_	_	_	_	_	_	_	_	_	_	_		Arabidopsis;	knapsak | PubChem | TARTARUS	B(i)	C0000757
108	pol_neg_5915	_	| | Uridine 5'-phosphate	_	_	_	_	_	_	_	_	_	_	_	_		Arabidopsis;	knapsak | PubChem | TARTARUS	B(i)
109	pol_neg_6275	_	| C04437: 1-(5-Phosphoribosyl)imidazole-4-acetate |	_	_	_	_	_	_	_	_	_	_	_	_		Arabidopsis;	knapsak | PubChem | TARTARUS	B(i)
110	pol_neg_6444	_	| | D-Gentiobiose OR D-Maltose OR D-Trehalose	_	_	_	_	_	_	_	_	_	_	_	_		Arabidopsis;	knapsak | PubChem | TARTARUS	B(i)
111	pol_neg_6446	_	C00007502: 2,3,4,5-Tetrahydrodipicolinate;THDP | C00015075: Cetoniacytone B | C03972: (S)-2,3,4,5-Tetrahydropyridine-2,6-dicarboxylate, delta1-Piperidine-2,6-dicarboxylate | C12108: 5-Deoxy-5-amino-3-dehydroshikimic acid | C17356: 2-Formyloxymethylclavam |	_	_	_	_	_	_	_	_	_	_	_	_		Arabidopsis;	knapsak | PubChem | TARTARUS	B(i)	C0000750
112	pol_neg_6916	_	C00001488: Sinigrin;2-Phenylethyl glucosinolate;Allyl glucosinolate | C08427: 2-Propenyl glucosinolate |	_	_	_	_	_	_	_	_	_	_	_	_		Arabidopsis;	knapsak | PubChem | TARTARUS	B(i)	C0000148
113	pol_neg_70	_	| | beta-Hydoxypyruvic acid	_	_	_	_	_	_	_	_	_	_	_	_		Arabidopsis;	knapsak | PubChem | TARTARUS	B(i)
114	pol_neg_7160	_	C00002474: Fraxin | C00019844: 6,7-Dihydroxy-5-methoxycoumarin 6-beta-D-glucopyranoside | C09266: Fraxin |	_	_	_	_	_	_	_	_	_	_	_	_		Arabidopsis;	knapsak | PubChem | TARTARUS	B(i)	C0000247
115	pol_neg_7182	_	C00002041: Gerrardine | C10147: Gerrardine |	_	_	_	_	_	_	_	_	_	_	_	_		Arabidopsis;	knapsak | PubChem | TARTARUS	B(i)	C0000204
116	pol_neg_7235	_	C00007586: 3-Butenylglucosinolate;Gluconapin | C00007829: 2-Methyl-2-propenyl glucosinolate | |	_	_	_	_	_	_	_	_	_	_	_	_		Arabidopsis;	knapsak | PubChem | TARTARUS	B(i)	C0000758
117	pol_neg_7298	_	C00001468: Glucocochlearin;1-Methylpropyl glucosinolate;Glucojiabutin;sec-Butyl glucosinolate | C00007796: n-Butyl glucosinolate | C00007830: 2-Methylpropyl glucosinolate;Isobutyl glucosinolate | C08407: 1-Methylpropyl glucosinolate | C17256: 2-Methylpropyl glucosinolate, Isobutyl glucosinolate |	_	_	_	_	_	_	_	_	_	_	_	_		Arabidopsis;	knapsak | PubChem | TARTARUS	B(i)	C0000146
118	pol_neg_7338	_	C00007340: 3-Hydroxypropyl glucosinolate | C00007817: 2-Hydroxypropyl glucosinolate | C00007826: 1-Methyl-2-hydroxyetyl glucosinolate;Glucosisymbrin | C17275: 1-Methyl-2-hydroxyetyl glucosinolate, Glucosisymbrin |	_	_	_	_	_	_	_	_	_	_	_	_		Arabidopsis;	knapsak | PubChem | TARTARUS	B(i)	C0000734
119	pol_neg_7537	_	C00002717: 1-Caffeoyl-4-deoxyquinic acid | C00002730: 4-p-Coumaroylquinic acid | C10432: 1-Caffeoyl-4-deoxyquinic acid | C10441: 4-p-Coumaroylquinic acid | C12208: trans-5-O-(4-Coumaroyl)-D-quinate |	_	_	_	_	_	_	_	_	_	_	_	_		Arabidopsis;	knapsak | PubChem | TARTARUS	B(i)	C0000271
120	pol_neg_7652	_	C00001463: Glucobrassicanapin;4-Pentenyl glucosinolate | |	_	_	_	_	_	_	_	_	_	_	_	_		Arabidopsis;	knapsak | PubChem | TARTARUS	B(i)	C0000146
121	pol_neg_7685	_	| | D-Gentiobiose OR D-Maltose OR D-Trehalose	_	_	_	_	_	_	_	_	_	_	_	_		Arabidopsis;	knapsak | PubChem | TARTARUS	B(i)
122	pol_neg_7730	_	C00001486: Progoitrin;2(R)-2-Hydroxy-3-butenyl glucosinolate | C00007864: 2(S)-Hydroxy-3-butenylglucosinolate;Epiprogoitrin | C08425: 2(R)-2-Hydroxy-3-butenyl glucosinolate, Progoitrin |	_	_	_	_	_	_	_	_	_	_	_	_		Arabidopsis;	knapsak | PubChem | TARTARUS	B(i)	C0000148
123	pol_neg_7735	_	C00007823: 1-Methylbutyl glucosinolate | C00007824: 2-Methylbutyl glucosinolate | C00007825: 3-Methylbutyl glucosinolate | C00007853: n-Pentyl glucosinolate | C17257: 2-Methylbutyl glucosinolate |	_	_	_	_	_	_	_	_	_	_	_	_		Arabidopsis;	knapsak | PubChem | TARTARUS	B(i)	C0000782
124	pol_neg_7851	_	C00018654: Hemipyocyanin | |	_	_	_	_	_	_	_	_	_	_	_	_		Arabidopsis;	knapsak | PubChem | TARTARUS	B(i)	C0001865
125	pol_neg_8093	_	C00007801: 5-Hexenyl glucosinolate | |	_	_	_	_	_	_	_	_	_	_	_	_		Arabidopsis;	knapsak | PubChem | TARTARUS	B(i)	C0000780
126	pol_neg_8157	_	C00007802: n-Hexyl glucosinolate | C00007827: 3-Methylpentyl glucosinolate | C00007828: 4-Methylpentyl glucosinolate | |	_	_	_	_	_	_	_	_	_	_	_	_		Arabidopsis;	knapsak | PubChem | TARTARUS	B(i)	C0000780
127	pol_neg_8158	_	C00007802: n-Hexyl glucosinolate | C00007827: 3-Methylpentyl glucosinolate | C00007828: 4-Methylpentyl glucosinolate | |	_	_	_	_	_	_	_	_	_	_	_	_		Arabidopsis;	knapsak | PubChem | TARTARUS	B(i)	C0000780
128	pol_neg_8212	_	C00001457: Triglochinin | C08342: 2-Hexenedioic acid,4-(cyano(beta-D-glucopyranosyloxy)methylene)-, (E,Z)- | C18062: 2,4,7-Trihydroxy-1,4-benzoxazin-3-one-glucoside |	_	_	_	_	_	_	_	_	_	_	_	_		Arabidopsis;	knapsak | PubChem | TARTARUS	B(i)	C0000145
129	pol_neg_8261	_	C00001473: Glucoiberverin;3-(Methylthio)propyl glucosinolate | |	_	_	_	_	_	_	_	_	_	_	_	_		Arabidopsis;	knapsak | PubChem | TARTARUS	B(i)	C0000147
130	pol_neg_8369	_	| C14154: beta-Tocotrienol |	_	_	_	_	_	_	_	_	_	_	_	_		Arabidopsis;	knapsak | PubChem | TARTARUS	B(i)
131	pol_neg_8406	_	| C01344: 2'-Deoxyinosine 5'-diphosphate |	_	_	_	_	_	_	_	_	_	_	_	_		Arabidopsis;	knapsak | PubChem | TARTARUS	B(i)
132	pol_neg_8475	_	C00007800: 6-Heptenyl glucosinolate | |	_	_	_	_	_	_	_	_	_	_	_	_		Arabidopsis;	knapsak | PubChem | TARTARUS	B(i)	C0000780
133	pol_neg_8490	_	| C02080: Stipitatonate |	_	_	_	_	_	_	_	_	_	_	_	_		Arabidopsis;	knapsak | PubChem | TARTARUS	B(i)
134	pol_neg_8638	_	C00007344: 4-Methylthiobutyl glucosinolate;Glucoerucin | |	_	_	_	_	_	_	_	_	_	_	_	_		Arabidopsis;	knapsak | PubChem | TARTARUS	B(i)	C0000734
135	pol_neg_8712	_	C00007343: 3-Methylsulfinylpropyl glucosinolate;Glucoiberin | C08411: 3-Methylsulfinylpropyl glucosinolate |	_	_	_	_	_	_	_	_	_	_	_	_		Arabidopsis;	knapsak | PubChem | TARTARUS	B(i)	C0000734
136	pol_neg_8723	_	C00007350: 2-Phenylethylglucosinolate;Gluconasturtiin | C08417: 2-Phenylethyl glucosinolate |	_	_	_	_	_	_	_	_	_	_	_	_		Arabidopsis;	knapsak | PubChem | TARTARUS	B(i)	C0000735
137	pol_neg_8834	_	C00007445: Adenosine 5'-phosphosulfate | C00224: Adenylyl sulfate, APS |	_	_	_	_	_	_	_	_	_	_	_	_		Arabidopsis;	knapsak | PubChem | TARTARUS	B(i)	C0000744
138	pol_neg_8846	_	| C19118: Dimexano |	_	_	_	_	_	_	_	_	_	_	_	_		Arabidopsis;	knapsak | PubChem | TARTARUS	B(i)
139	pol_neg_8937	_	| C02130: 6-O-Acetyl-alpha-D-glucopyranosyl-(1->4)-D-glucose |	_	_	_	_	_	_	_	_	_	_	_	_		Arabidopsis;	knapsak | PubChem | TARTARUS	B(i)
140	pol_neg_8982	_	| | Apigenin-7-glucoside	_	_	_	_	_	_	_	_	_	_	_	_		Arabidopsis;	knapsak | PubChem | TARTARUS	B(i)
141	pol_neg_8983	_	| C02954: 6-Aminopenicillanic acid |	_	_	_	_	_	_	_	_	_	_	_	_		Arabidopsis;	knapsak | PubChem | TARTARUS	B(i)
142	pol_neg_9081	_	C00007593: 5-Methylthiopentylglucosinolate;Glucoberteroin | |	_	_	_	_	_	_	_	_	_	_	_	_		Arabidopsis;	knapsak | PubChem | TARTARUS	B(i)	C0000759
143	pol_neg_9149	_	C00007545: 4-Methylsulfinylbutyl glucosinolate;Glucoraphanin | |	_	_	_	_	_	_	_	_	_	_	_	_		Arabidopsis;	knapsak | PubChem | TARTARUS	B(i)	C0000754
144	pol_neg_9377	_	| C06675: 3-Sulfomuconate | C06676: 4-Carboxymethyl-4-sulfobut-2-en-4-olide |	_	_	_	_	_	_	_	_	_	_	_	_		Arabidopsis;	knapsak | PubChem | TARTARUS	B(i)
145	pol_neg_9417	_	C00007850: 5-Oxooctyl glucosinolate;Glucocappasalin | |	_	_	_	_	_	_	_	_	_	_	_	_		Arabidopsis;	knapsak | PubChem | TARTARUS	B(i)	C0000785
146	pol_neg_9500	_	C00000125: Glucobrassicin;Glucobrassicine;3-Indolylmethylglucosinolate | C05837: Glucobrassicin |	_	_	_	_	_	_	_	_	_	_	_	_		Arabidopsis;	knapsak | PubChem | TARTARUS	B(i)	C0000012
147	pol_neg_9530	_	C00007844: 6-(Methylthio)hexyl glucosinolate;Glucolesquerellin | C17250: 6-Methylthiohexyl glucosinolate, Glucolesquerellin |	_	_	_	_	_	_	_	_	_	_	_	_		Arabidopsis;	knapsak | PubChem | TARTARUS	B(i)	C0000784
148	pol_neg_9587	_	5-Methylsulfinylpentyl glucosinolate;Glucoalyssin | |	_	_	_	_	_	_	_	_	_	_	_	_		Arabidopsis;	knapsak | PubChem | TARTARUS	B(i)	5-Methyl
149	pol_neg_9589	_	3-Hydroxy-5-(methylthio)pentyl glucosinolate | |	_	_	_	_	_	_	_	_	_	_	_	_		Arabidopsis;	knapsak | PubChem | TARTARUS	B(i)	3-Hydrox
150	pol_neg_9592	_	C00007855: 4-Phenylbutyl glucosinolate | |	_	_	_	_	_	_	_	_	_	_	_	_		Arabidopsis;	knapsak | PubChem | TARTARUS	B(i)	C0000785
151	pol_neg_9618	_	| C11446: 4-Dihydroxyethyl-8,9-epoxy-enediyne | D00233: Anthraderm (TN) | C18856: Flurecol |	_	_	_	_	_	_	_	_	_	_	_	_		Arabidopsis;	knapsak | PubChem | TARTARUS	B(i)
152	pol_neg_9887	_	C00007353: 7-Methylthioheptyl glucosinolate | C17252: 7-Methylthioheptyl glucosinolate |	_	_	_	_	_	_	_	_	_	_	_	_		Arabidopsis;	knapsak | PubChem | TARTARUS	B(i)	C0000735
153	pol_neg_991	_	| | Glycylglycine	_	_	_	_	_	_	_	_	_	_	_	_		Arabidopsis;	knapsak | PubChem | TARTARUS	B(i)
154	pol_neg_9914	_	C00000127: 4-Hydroxyglucobrassicin;4-Hydroxy-3-indolylmethylglucosinolate | C08422: 4-Hydroxy-3-indolylmethylglucosinolate |	_	_	_	_	_	_	_	_	_	_	_	_		Arabidopsis;	knapsak | PubChem | TARTARUS	B(i)	C0000012
155	pol_neg_9916	_	C00000130: 5-Hydroxyglucobrassicin;5-Hydroxy-3-indolylmethylglucosinolate | C08422: 4-Hydroxy-3-indolylmethylglucosinolate |	_	_	_	_	_	_	_	_	_	_	_	_		Arabidopsis;	knapsak | PubChem | TARTARUS	B(i)	C0000013
156	pol_neg_9951	_	C00007348: 6-Methylsulfinylhexyl glucosinolate;Glucohesperin | C00007813: 3-Hydroxy-6-(methylthio)hexyl glucosinolate | |	_	_	_	_	_	_	_	_	_	_	_	_		Arabidopsis;	knapsak | PubChem | TARTARUS	B(i)	C0000734
157	pol_pos_10043	_	C00001453: Proteacin | C08339: Proteacin |	_	_	_	_	_	_	_	_	_	_	_	_		Arabidopsis;	knapsak | PubChem | TARTARUS	B(i)	C0000145
158	pol_pos_10108	_	C00007356 | |	_	_	_	_	_	_	_	_	_	_	_	_		Arabidopsis;	knapsak | PubChem | TARTARUS	B(i)	C0000735
159	pol_pos_10118	_	C00000126: Neoglucobrassicin;1-Methoxy-3-indolylmethylglucosinolate | C00000128: 4-4-Methoxyglucobrassicin;4-Methoxy-3-indolylmethylglucosinolate | C08423: 4-Methoxy-3-indolylmethyl glucosinolate | C08424: 1-Methoxy-3-indolylmethyl glucosinolate |	_	_	_	_	_	_	_	_	_	_	_	_		Arabidopsis;	knapsak | PubChem | TARTARUS	B(i)	C0000012
160	pol_pos_10120	_	| C03928: 3-Phosphoglycerol-glutathione |	_	_	_	_	_	_	_	_	_	_	_	_		Arabidopsis;	knapsak | PubChem | TARTARUS	B(i)
161	pol_pos_10127	_	| C01747: Galactosylsphingosine, Psychosine |	_	_	_	_	_	_	_	_	_	_	_	_		Arabidopsis;	knapsak | PubChem | TARTARUS	B(i)
162	pol_pos_10136	_	C00007352 | |	_	_	_	_	_	_	_	_	_	_	_	_		Arabidopsis;	knapsak | PubChem | TARTARUS	B(i)	C0000735
163	pol_pos_10224	_	| C18687: Ethoprophos |	_	_	_	_	_	_	_	_	_	_	_	_		Arabidopsis;	knapsak | PubChem | TARTARUS	B(i)
164	pol_pos_10267	_	C00002183: Maculine | C10714: 1,3-Dioxolo(4,5-g)furo(2,3-b)quinoline, 9-methoxy- |	_	_	_	_	_	_	_	_	_	_	_	_		Arabidopsis;	knapsak | PubChem | TARTARUS	B(i)	C0000218
165	pol_pos_10351	_	C00007644: 2-(4'-Methylthio)butylmalic acid | C17218: 2-(4'-Methylthio)butylmalate | C17219: 3-(4'-Methylthio)butylmalate |	_	_	_	_	_	_	_	_	_	_	_	_		Arabidopsis;	knapsak | PubChem | TARTARUS	B(i)	C0000764
166	pol_pos_10423	_	C00003331: Microlenin | C00013178: (+)-Triptofoldin B;TWHR 2;Triptofoldin B;Triptofordin B;[3R-(3alpha,5beta,5aalpha,6alpha,9beta,9aalpha,10R*)]-Octahydro-2,2,5a,9-tetramethyl-, 5,6-dibenzoate 2H-3,9a-methano-1-benzoxepin-5,6,9,10-tetrol | C09510: Microlenin |	_	_	_	_	_	_	_	_	_	_	_	_		Arabidopsis;	knapsak | PubChem | TARTARUS	B(i)	C0000333
167	pol_pos_10668	_	| C07024: 3'-Keto-3'-deoxy-ATP |	_	_	_	_	_	_	_	_	_	_	_	_		Arabidopsis;	knapsak | PubChem | TARTARUS	B(i)
168	pol_pos_10693	_	C00001956: Selagine | C00011214: N-Demethylchanoclavine-II;Norchanoclavine II | C09897: Selagine |	_	_	_	_	_	_	_	_	_	_	_	_		Arabidopsis;	knapsak | PubChem | TARTARUS	B(i)	C0000195
169	pol_pos_10814	_	| C07752: (4-Amino-1-hydroxybutylidene)bisphosphonic acid, Alendronate |	_	_	_	_	_	_	_	_	_	_	_	_		Arabidopsis;	knapsak | PubChem | TARTARUS	B(i)
170	pol_pos_1082	_	| C07103: 2-Hydroxy-1,4-benzoquinone |	_	_	_	_	_	_	_	_	_	_	_	_		Arabidopsis;	knapsak | PubChem | TARTARUS	B(i)
171	pol_pos_10889	_	| D01591: Ethyl 4-nitrophenyl ethylphosphonate (JAN) | C13048: Ethyl 4-nitrophenyl ethylphosphonate |	_	_	_	_	_	_	_	_	_	_	_	_		Arabidopsis;	knapsak | PubChem | TARTARUS	B(i)
172	pol_pos_10947	_	C00007620: 4-(Cytidine 5'-diphospho)-2-C-methyl-D-erythritol | C11435: 4-(Cytidine 5'-diphospho)-2-C-methyl-D-erythritol |	_	_	_	_	_	_	_	_	_	_	_	_		Arabidopsis;	knapsak | PubChem | TARTARUS	B(i)	C0000762
173	pol_pos_11060	_	| | Maltotriose	_	_	_	_	_	_	_	_	_	_	_	_		Arabidopsis;	knapsak | PubChem | TARTARUS	B(i)
174	pol_pos_1114	_	C00001246: Dimethyl trisulfide | C08372: DMTS |	_	_	_	_	_	_	_	_	_	_	_	_		Arabidopsis;	knapsak | PubChem | TARTARUS	B(i)	C0000124
175	pol_pos_11177	_	| C03598: CDPparatose | C03599: CDPtyvelose |	_	_	_	_	_	_	_	_	_	_	_	_		Arabidopsis;	knapsak | PubChem | TARTARUS	B(i)
176	pol_pos_11278	_	C00008645: Kenusanone C | |	_	_	_	_	_	_	_	_	_	_	_	_		Arabidopsis;	knapsak | PubChem | TARTARUS	B(i)	C0000864
177	pol_pos_11305	_	| C18281: 10-Oxabenzo[def]chrysen-9-one |	_	_	_	_	_	_	_	_	_	_	_	_		Arabidopsis;	knapsak | PubChem | TARTARUS	B(i)
178	pol_pos_1131	_	| C02227: 2-Aminonaphthalene, 2-Naphthylamine | C14790: 1-Naphthylamine |	_	_	_	_	_	_	_	_	_	_	_	_		Arabidopsis;	knapsak | PubChem | TARTARUS	B(i)
179	pol_pos_11341	_	C00006611: Luteolinidin | C00007232: Pelargonidin | |	_	_	_	_	_	_	_	_	_	_	_	_		Arabidopsis;	knapsak | PubChem | TARTARUS	B(i)	C0000661
180	pol_pos_11386	_	C00012767: Rupestrinol;[1S-(1alpha,4beta,4abeta,5beta,6beta,8aalpha)]-Decahydro-4-(hydroxymethyl)-8a-methyl-6-(1-methylethyl)-1,4,5-naphthalenetriol | C00012769: Chenopotetraol;[1S-(1alpha,2alpha,4abeta,7beta,8alpha,8aalpha)]-Decahydro-7-(1-hydroxy-1-methylethyl)-1,4a-dimethyl-1,2,8-naphthalenetriol | C00012770: [1S-(1alpha,2beta,4abeta,7beta,8alpha,8aalpha)]-Decahydro-7-(1-hydroxy-1-methylethyl)…	_	_	_	_	_	_	_	_	_	_	_	_		Arabidopsis;	knapsak | PubChem | TARTARUS	B(i)	C0001276
181	pol_pos_11658	_	| C00619: 3-Oxo-delta4-steroid | C01034: 3-Oxo-delta5-steroid | C02941: 3-Oxo-delta1-steroid |	_	_	_	_	_	_	_	_	_	_	_	_		Arabidopsis;	knapsak | PubChem | TARTARUS	B(i)
182	pol_pos_11721	_	| C13864: 1-O-(1Z-Tetradecenyl)-2-(9Z-octadecenoyl)-sn-glycerol |	_	_	_	_	_	_	_	_	_	_	_	_		Arabidopsis;	knapsak | PubChem | TARTARUS	B(i)
183	pol_pos_11875	_	C00000117: Indole-3-acetyl-L-aspartic acid | C00000118: N-Malonyltryptophan | |	_	_	_	_	_	_	_	_	_	_	_	_		Arabidopsis;	knapsak | PubChem | TARTARUS	B(i)	C0000011
184	pol_pos_11906	_	C00001994: Aralionine A | |	_	_	_	_	_	_	_	_	_	_	_	_		Arabidopsis;	knapsak | PubChem | TARTARUS	B(i)	C0000199
185	pol_pos_11908	_	| C11978: 5-Oxoavermectin ''1a'' aglycone |	_	_	_	_	_	_	_	_	_	_	_	_		Arabidopsis;	knapsak | PubChem | TARTARUS	B(i)
186	pol_pos_11951	_	C00014704: Dehydroxyhexaspermone C | |	_	_	_	_	_	_	_	_	_	_	_	_		Arabidopsis;	knapsak | PubChem | TARTARUS	B(i)	C0001470
187	pol_pos_11988	_	C00019797: (E)-Betulin-3-p-coumarate;3-(E)-p-Coumaroylbetulin | C00019798: (Z)-Betulin-3-p-coumarate;3-(Z)-p-Coumaroylbetulin | |	_	_	_	_	_	_	_	_	_	_	_	_		Arabidopsis;	knapsak | PubChem | TARTARUS	B(i)	C0001979
188	pol_pos_1201	_	| C00940: 2-Oxoglutaramate | C05572: 4-Ketoglutaramate |	_	_	_	_	_	_	_	_	_	_	_	_		Arabidopsis;	knapsak | PubChem | TARTARUS	B(i)
189	pol_pos_12138	_	C00019685: 4'-Phospho-D-pantothenic acid | C03492: (R)-4'-Phosphopantothenate, D-4'-Phosphopantothenate |	_	_	_	_	_	_	_	_	_	_	_	_		Arabidopsis;	knapsak | PubChem | TARTARUS	B(i)	C0001968
190	pol_pos_12172	_	| C05513: Uric acid ribonucleoside |	_	_	_	_	_	_	_	_	_	_	_	_		Arabidopsis;	knapsak | PubChem | TARTARUS	B(i)
191	pol_pos_12176	_	C00021444: Hypoloside B | C00021445: Hypoloside C | |	_	_	_	_	_	_	_	_	_	_	_	_		Arabidopsis;	knapsak | PubChem | TARTARUS	B(i)	C0002144
192	pol_pos_12246	_	C00015901: 3-Isopentadienyl-3',4,5'-trihydroxystilbene | C00019264: Methyl oroxylopterocarpan;(6aR,11aR)-5',5'-Dimethyl-4',5'-dihydrofurano[2',3':3:2]pterocarpan | C15049: (2-Butylbenzofuran-3-yl)(4-hydroxyphenyl)ketone |	_	_	_	_	_	_	_	_	_	_	_	_		Arabidopsis;	knapsak | PubChem | TARTARUS	B(i)	C0001590
193	pol_pos_12341	_	| C00127: GSSG, Oxidized glutathione | D00031: Glutathione (TN) |	_	_	_	_	_	_	_	_	_	_	_	_		Arabidopsis;	knapsak | PubChem | TARTARUS	B(i)
194	pol_pos_12381	_	C00006418: Safflomin C | |	_	_	_	_	_	_	_	_	_	_	_	_		Arabidopsis;	knapsak | PubChem | TARTARUS	B(i)	C0000641
195	pol_pos_1239	_	| | 4-Guanidinobutyric acid	_	_	_	_	_	_	_	_	_	_	_	_		Arabidopsis;	knapsak | PubChem | TARTARUS	B(i)
196	pol_pos_12439	_	C00014534: 4''',5,5'',7''-Tetrahydroxy-3'',3''',4'-trimethoxy-6-O-alpha,7- beta-flavone-chalcone | C00014535: 4',5,5'',7''-Tetrahydroxy-3',3'',4'''-trimethoxy-6-O-alpha,7-beta-flavone-chalcone | C00014536: 3''',5,5'',7''-Tetrahydroxy-3'',4',4'''-trimethoxy-6-O-alpha,7-beta-flavone-chalcone | C00014537: 4',5,5'',7''-Tetrahydroxy-3',3'',4'''-trimethoxy-6-O-beta,7-alpha-flavone-chalcone | |	_	_	_	_	_	_	_	_	_	_	_	_		Arabidopsis;	knapsak | PubChem | TARTARUS	B(i)	C0001453
197	pol_pos_12446	_	| C05177: (1S)-1,2,3,4-Tetrahydro-1-[[4-[2-hydroxy-5-[[(1R)-1,2,3,4-tetrahydro-7-hydroxy-6-methoxy-2-methyl-1-isoquinolinyl]methyl]phenoxy]phenyl]methyl]-6-methoxy-2-methyl-7-isoquinolinol, Berbamunine | C06511: Guattegaumerine | C06515: Magnoline |	_	_	_	_	_	_	_	_	_	_	_	_		Arabidopsis;	knapsak | PubChem | TARTARUS	B(i)
198	pol_pos_12470	_	| C02487: (Ac)2-L-Lys-D-Ala |	_	_	_	_	_	_	_	_	_	_	_	_		Arabidopsis;	knapsak | PubChem | TARTARUS	B(i)
199	pol_pos_12481	_	C00000323: Methyl pheophorbide b | |	_	_	_	_	_	_	_	_	_	_	_	_		Arabidopsis;	knapsak | PubChem | TARTARUS	B(i)	C0000032
200	pol_pos_12531	_	| C20121: (2E,6E)-Farnesyl phosphate, Farnesyl phosphate |	_	_	_	_	_	_	_	_	_	_	_	_		Arabidopsis;	knapsak | PubChem | TARTARUS	B(i)
201	pol_pos_12544	_	C00013133: Cathidine D;(3alpha,5beta,5aalpha,6alpha,7alpha,8beta,9beta,9aalpha)-(+)-6-(Acetyloxy)-5a-[(acetyloxy)methyl]-7-(benzoyloxy)octahydro-8,9-dihydroxy-2,2,9-trimethyl-2H-3,9a-methano-1-benzoxepin-5-yl ester 3-pyridinecarboxylic acid | |	_	_	_	_	_	_	_	_	_	_	_	_		Arabidopsis;	knapsak | PubChem | TARTARUS	B(i)	C0001313
202	pol_pos_12556	_	| C01632: N-Carbobenzoxyglycylproline, Z-Gly-Pro-OH |	_	_	_	_	_	_	_	_	_	_	_	_		Arabidopsis;	knapsak | PubChem | TARTARUS	B(i)
203	pol_pos_12591	_	| C19971: UDP-2,4-diacetamido-2,4,6-trideoxy-beta-L-altrose |	_	_	_	_	_	_	_	_	_	_	_	_		Arabidopsis;	knapsak | PubChem | TARTARUS	B(i)
204	pol_pos_12597	_	C00001494: Covicine | C08430: Convicine |	_	_	_	_	_	_	_	_	_	_	_	_		Arabidopsis;	knapsak | PubChem | TARTARUS	B(i)	C0000149
205	pol_pos_1262	_	| C00580: 75-18-3, Dimethyl sulfide, Methyl thioether |	_	_	_	_	_	_	_	_	_	_	_	_		Arabidopsis;	knapsak | PubChem | TARTARUS	B(i)
206	pol_pos_12623	_	C00007740: N-(Ethoxycarbonyl)angustifoline | D08494: Roxatidine (INN) |	_	_	_	_	_	_	_	_	_	_	_	_		Arabidopsis;	knapsak | PubChem | TARTARUS	B(i)	C0000774
207	pol_pos_12633	_	C00016478: CW 69B;Carbazoquinocin B;WS 63967D | C00016479: CW 69C;Carbazoquinocin C;WS 63967E | |	_	_	_	_	_	_	_	_	_	_	_	_		Arabidopsis;	knapsak | PubChem | TARTARUS	B(i)	C0001647
208	pol_pos_12847	_	| C06691: Actinorhodine |	_	_	_	_	_	_	_	_	_	_	_	_		Arabidopsis;	knapsak | PubChem | TARTARUS	B(i)
209	pol_pos_12932	_	C00007256: NAD;Nicotinamide adenine dinucleotide | |	_	_	_	_	_	_	_	_	_	_	_	_		Arabidopsis;	knapsak | PubChem | TARTARUS	B(i)	C0000725
210	pol_pos_13013	_	C00014769: Pelargonidin 3-O-[2-O-(beta-D-xylopyranosyl)-6-O-(malonyl)-bata-D-galactopyranoside] | |	_	_	_	_	_	_	_	_	_	_	_	_		Arabidopsis;	knapsak | PubChem | TARTARUS	B(i)	C0001476
211	pol_pos_1305	_	| | L-Glutamine	_	_	_	_	_	_	_	_	_	_	_	_		Arabidopsis;	knapsak | PubChem | TARTARUS	B(i)
212	pol_pos_13074	_	C00004346: Luteolin 3'-methyl ether 7-glucuronosyl-(1->2)-glucuronide | C00013677: Chrysoeriol 7,4'-diglucuronide;4-[7-(beta-D-Glucopyranuronosyloxy)-5-hydroxy-4-oxo-4H-1-benzopyran-2-yl]-2-methoxyphenyl beta-D-glucopyranosiduronic acid | |	_	_	_	_	_	_	_	_	_	_	_	_		Arabidopsis;	knapsak | PubChem | TARTARUS	B(i)	C0000434
213	pol_pos_13208	_	C00019568: Nicotinic acid dinucleotide | |	_	_	_	_	_	_	_	_	_	_	_	_		Arabidopsis;	knapsak | PubChem | TARTARUS	B(i)	C0001956
214	pol_pos_1346	_	| | L-Glutamic acid	_	_	_	_	_	_	_	_	_	_	_	_		Arabidopsis;	knapsak | PubChem | TARTARUS	B(i)
215	pol_pos_1355	_	| C17245: 5-Methylthiopentanaldoxime |	_	_	_	_	_	_	_	_	_	_	_	_		Arabidopsis;	knapsak | PubChem | TARTARUS	B(i)
216	pol_pos_13709	_	C00010606: Periclymenosidic acid | |	_	_	_	_	_	_	_	_	_	_	_	_		Arabidopsis;	knapsak | PubChem | TARTARUS	B(i)	C0001060
217	pol_pos_13720	_	C00001700: Calycanthidine | C09097: Calycanthidine |	_	_	_	_	_	_	_	_	_	_	_	_		Arabidopsis;	knapsak | PubChem | TARTARUS	B(i)	C0000170
218	pol_pos_13897	_	C00006908: Malonylmalvin | C00006909: Malvidin 3-glucoside-5-(6''-malonylglucoside) | |	_	_	_	_	_	_	_	_	_	_	_	_		Arabidopsis;	knapsak | PubChem | TARTARUS	B(i)	C0000690
219	pol_pos_14034	_	| C13890: 1-Hexadecanoyl-2-(9Z-octadecenoyl)-sn-glycero-3-pyrophosphate, 1-Hexadecanoyl-2-(9Z-octadecenoyl)-sn-glycerol 3-pyrophosphate |	_	_	_	_	_	_	_	_	_	_	_	_		Arabidopsis;	knapsak | PubChem | TARTARUS	B(i)
220	pol_pos_14104	_	C00007823 | C00007824 | C00007825 | C00007853 | |	_	_	_	_	_	_	_	_	_	_	_	_		Arabidopsis;	knapsak | PubChem | TARTARUS	B(i)	C0000782
221	pol_pos_14130	_	| C04899: (6S)-6beta-Hydroxy-1,4,5,6-tetrahydronicotinamide-adenine dinucleotide 2'-phosphate |	_	_	_	_	_	_	_	_	_	_	_	_		Arabidopsis;	knapsak | PubChem | TARTARUS	B(i)
222	pol_pos_14132	_	C00014357: 5,7-Dihydroxy-4'-methoxy-6,8-di-C-methylflavanone 7-(4,6-digalloylglucoside);Matteucinol-7-O-[4'',6''-di-O-galloyl]-beta-D-glucopyranoside | |	_	_	_	_	_	_	_	_	_	_	_	_		Arabidopsis;	knapsak | PubChem | TARTARUS	B(i)	C0001435
223	pol_pos_14170	_	C00011287: Neoechinulin D | C00011289: Isoechinulin A | |	_	_	_	_	_	_	_	_	_	_	_	_		Arabidopsis;	knapsak | PubChem | TARTARUS	B(i)	C0001128
224	pol_pos_14246	_	C00007709: 13alpha-(Cinnamoyloxy)-lupanine | C18515: Chromafenozide |	_	_	_	_	_	_	_	_	_	_	_	_		Arabidopsis;	knapsak | PubChem | TARTARUS	B(i)	C0000770
225	pol_pos_14294	_	| C15666: (7R)-7-(4-Carboxybutanamido)cephalosporanate |	_	_	_	_	_	_	_	_	_	_	_	_		Arabidopsis;	knapsak | PubChem | TARTARUS	B(i)
226	pol_pos_14296	_	| C06627: 4-Dedimethylamino-4-oxo-anhydrotetracycline, 4-Keto-anhydrotetracycline |	_	_	_	_	_	_	_	_	_	_	_	_		Arabidopsis;	knapsak | PubChem | TARTARUS	B(i)
227	pol_pos_14297	_	C00014344: Alhagidin;5,7,3'-Trihydroxy-4'-methoxyflavanone 7-galactosyl-(1->2)-[rhamnosyl-(1->6)]glucoside | |	_	_	_	_	_	_	_	_	_	_	_	_		Arabidopsis;	knapsak | PubChem | TARTARUS	B(i)	C0001434
228	pol_pos_14323	_	C00016468: Paeciloquinone F | |	_	_	_	_	_	_	_	_	_	_	_	_		Arabidopsis;	knapsak | PubChem | TARTARUS	B(i)	C0001646
229	pol_pos_144	_	| C05985: 2-Propyn-1-al, Propiolaldehyde |	_	_	_	_	_	_	_	_	_	_	_	_		Arabidopsis;	knapsak | PubChem | TARTARUS	B(i)
230	pol_pos_14719	_	C00002267: Tomatidine | C10826: 77-59-8, Tomatidine |	_	_	_	_	_	_	_	_	_	_	_	_		Arabidopsis;	knapsak | PubChem | TARTARUS	B(i)	C0000226
231	pol_pos_14816	_	C00015653: Tubulysin A | |	_	_	_	_	_	_	_	_	_	_	_	_		Arabidopsis;	knapsak | PubChem | TARTARUS	B(i)	C0001565
232	pol_pos_14912	_	| C02811: Anhydrotetracycline |	_	_	_	_	_	_	_	_	_	_	_	_		Arabidopsis;	knapsak | PubChem | TARTARUS	B(i)
233	pol_pos_14922	_	C00007374: Hydroxymethylbilane | C01024: Hydroxymethylbilane |	_	_	_	_	_	_	_	_	_	_	_	_		Arabidopsis;	knapsak | PubChem | TARTARUS	B(i)	C0000737
234	pol_pos_14997	_	C00007248: 7,8-Dihydrofolate;7,8-Dihydrofolic acid | C00415: 7,8-Dihydrofolic acid, Dihydrofolic acid |	_	_	_	_	_	_	_	_	_	_	_	_		Arabidopsis;	knapsak | PubChem | TARTARUS	B(i)	C0000724
235	pol_pos_15049	_	C00000277: Hallactone B | C09105: Hallactone B |	_	_	_	_	_	_	_	_	_	_	_	_		Arabidopsis;	knapsak | PubChem | TARTARUS	B(i)	C0000027
236	pol_pos_15070	_	C00005059: 3,5,8-Trimethoxy-3',4'-methylenedioxy-7-prenyloxyflavone;2-(1,3-Benzodioxol-5-yl)-3,5,8-trimethoxy-7-[(3-methyl-2-butenyl)oxy]-4H-1-benzopyran-4-one | C00009985: (+)-12a-Hydroxyerythynone | C00019224: 9,11-Dihydroxy-2,3,6-trimethoxy-8-prenhyl-6a,12a-didehydrorotenone | |	_	_	_	_	_	_	_	_	_	_	_	_		Arabidopsis;	knapsak | PubChem | TARTARUS	B(i)	C0000505
237	pol_pos_1508	_	| C00913: 3-Methyladenine | C02216: 1-Methyladenine | C02241: 7-Methyladenine |	_	_	_	_	_	_	_	_	_	_	_	_		Arabidopsis;	knapsak | PubChem | TARTARUS	B(i)
238	pol_pos_15090	_	C00006832: Cyanidin 3-[6-(6-p-coumarylglucosyl)-2-xylosylgalactoside] | C00006836: Cyanidin 3-(6''-(E)-p-coumarylsambubioside)-5-glucoside | C00014780: Cyanidin 3-(6''-(Z)-p-coumarylsambubioside)-5-glucoside | |	_	_	_	_	_	_	_	_	_	_	_	_		Arabidopsis;	knapsak | PubChem | TARTARUS	B(i)	C0000683
239	pol_pos_15115	_	C00003751: Messagenin | C04840: 3beta-Hydroxy-4beta-methyl-5alpha-cholest-7-ene-4alpha-carboxylate | C08631: Messagenin |	_	_	_	_	_	_	_	_	_	_	_	_		Arabidopsis;	knapsak | PubChem | TARTARUS	B(i)	C0000375
240	pol_pos_15198	_	C00011305: 9,10-Dihydroexserohilone | |	_	_	_	_	_	_	_	_	_	_	_	_		Arabidopsis;	knapsak | PubChem | TARTARUS	B(i)	C0001130
241	pol_pos_15289	_	| D07592: S-Adenosylmethionine disulfate ditosylate |	_	_	_	_	_	_	_	_	_	_	_	_		Arabidopsis;	knapsak | PubChem | TARTARUS	B(i)
242	pol_pos_15356	_	| C11315: S-(4-Azidophenacyl)glutathione |	_	_	_	_	_	_	_	_	_	_	_	_		Arabidopsis;	knapsak | PubChem | TARTARUS	B(i)
243	pol_pos_15376	_	C00008906: Epigallocatechin 3-O-caffeate | C00013263: Apocynin A;(2R,3S,10S)-10-(3,4-Dihydroxyphenyl)-3,4,9,10-tetrahydro-3,5-dihydroxy-2-(3,4,5-trihydroxyphenyl)-2H,8H-benzo[1,2-b:3,4-b']dipyran-8-one | C00013264: Apocynin C;(2R,3R,10S)-10-(3,4-Dihydroxyphenyl)-3,4,9,10-tetrahydro-3,5-dihydroxy-2-(3,4,5-trihydroxyphenyl)-2H,8H-benzo[1,2-b:3,4-b']dipyran-8-one | C00019853: Edgeworoside C | |	_	_	_	_	_	_	_	_	_	_	_	_		Arabidopsis;	knapsak | PubChem | TARTARUS	B(i)	C0000890
244	pol_pos_15520	_	C00007231: CDP-choline | C00307: CDP-choline, Cytidine 5'-diphosphocholine |	_	_	_	_	_	_	_	_	_	_	_	_		Arabidopsis;	knapsak | PubChem | TARTARUS	B(i)	C0000723
245	pol_pos_15547	_	C00008020: 3-Geranyl-4,2',4',6'-tetrahydroxy-5-prenyldihydrochalcone | |	_	_	_	_	_	_	_	_	_	_	_	_		Arabidopsis;	knapsak | PubChem | TARTARUS	B(i)	C0000802
246	pol_pos_15551	_	C00002026: Carpaine | C10135: Carpaine |	_	_	_	_	_	_	_	_	_	_	_	_		Arabidopsis;	knapsak | PubChem | TARTARUS	B(i)	C0000202
247	pol_pos_15586	_	| C19892: 4'-Apo-beta,psi-caroten-4'-al, beta-Apo-4'-carotenal |	_	_	_	_	_	_	_	_	_	_	_	_		Arabidopsis;	knapsak | PubChem | TARTARUS	B(i)
248	pol_pos_15588	_	C00016800: 11-O-Demethylpradinone II | C06773: 11-O-Demethylpradinone II |	_	_	_	_	_	_	_	_	_	_	_	_		Arabidopsis;	knapsak | PubChem | TARTARUS	B(i)	C0001680
249	pol_pos_15615	_	C00007355 | |	_	_	_	_	_	_	_	_	_	_	_	_		Arabidopsis;	knapsak | PubChem | TARTARUS	B(i)	C0000735
250	pol_pos_15930	_	C00005656: Spinatoside | C00005779: Syringetin 3-glucuronide | C00006020: Quercetagetin 7-(6''-acetylglucoside) | |	_	_	_	_	_	_	_	_	_	_	_	_		Arabidopsis;	knapsak | PubChem | TARTARUS	B(i)	C0000565
251	pol_pos_15933	_	C00011347: Cytochalasin Ppho | |	_	_	_	_	_	_	_	_	_	_	_	_		Arabidopsis;	knapsak | PubChem | TARTARUS	B(i)	C0001134
252	pol_pos_16029	_	| C06149: 6-(3'-Triphosphoryl-1'-methylglyceryl)-7-methyl-7,8-dihydrobiopterin |	_	_	_	_	_	_	_	_	_	_	_	_		Arabidopsis;	knapsak | PubChem | TARTARUS	B(i)
253	pol_pos_16081	_	C00009332: Camelliatannin C | C00009333: Camelliatannin E | |	_	_	_	_	_	_	_	_	_	_	_	_		Arabidopsis;	knapsak | PubChem | TARTARUS	B(i)	C0000933
254	pol_pos_16116	_	C00013925: Isorhamnetin 3-rhamnosyl-(1->6)-[rhamnosyl-(1->2)-(3'''-(E)-p-coumaroylgalactoside]-7-rhamnoside;Quercetin 3'-methyl ether 3-rhamnosyl-(1->6)-[rhamnosyl-(1->2)-(3'''-(E)-p-coumaroylgalactoside]-7-rhamnoside;3-[[O-6-Deoxy-alpha-L-mannopyranosyl-(1->2)-O-[6-deoxy-alpha-L-mannopyranosyl-(1->6)]-3-O-[(2E)-3-(4-hydroxyphenyl)-1-oxo-2-propenyl]-beta-D-galactopyranosyl]oxy]-7-[(6-deoxy-alpha-…	_	_	_	_	_	_	_	_	_	_	_	_		Arabidopsis;	knapsak | PubChem | TARTARUS	B(i)	C0001392
255	pol_pos_16117	_	| C05122: 81-24-3, Cholyltaurine, Taurocholic acid |	_	_	_	_	_	_	_	_	_	_	_	_		Arabidopsis;	knapsak | PubChem | TARTARUS	B(i)
256	pol_pos_16202	_	C00015110: Thielavin J | C00015113: Thielavin M | C00015114: Thielavin N | C00018391: Thielavin A | |	_	_	_	_	_	_	_	_	_	_	_	_		Arabidopsis;	knapsak | PubChem | TARTARUS	B(i)	C0001511
257	pol_pos_16204	_	C00016658: (+)-Crocacin A;Crocacin;Crocacin A | |	_	_	_	_	_	_	_	_	_	_	_	_		Arabidopsis;	knapsak | PubChem | TARTARUS	B(i)	C0001665
258	pol_pos_16519	_	C00002049: Juliflorine | C10154: Juliflorine |	_	_	_	_	_	_	_	_	_	_	_	_		Arabidopsis;	knapsak | PubChem | TARTARUS	B(i)	C0000204
259	pol_pos_1669	_	| | Histidine OR L-Asparagine	_	_	_	_	_	_	_	_	_	_	_	_		Arabidopsis;	knapsak | PubChem | TARTARUS	B(i)
260	pol_pos_16885	_	| D09802: Dequalinium salicylate (JAN) |	_	_	_	_	_	_	_	_	_	_	_	_		Arabidopsis;	knapsak | PubChem | TARTARUS	B(i)
261	pol_pos_1748	_	| C14179: Sulfoacetate |	_	_	_	_	_	_	_	_	_	_	_	_		Arabidopsis;	knapsak | PubChem | TARTARUS	B(i)
262	pol_pos_1833	_	| C05828: 1-Methyl-4-imidazoleacetic acid, Methylimidazoleacetate, Tele-methylimidazoleacetic acid | C13693: 4,5,6,7-Tetrahydroisoxazolo(5,4-c)pyridin-3-ol, THIP | D04282: Gaboxadol (USAN/INN) |	_	_	_	_	_	_	_	_	_	_	_	_		Arabidopsis;	knapsak | PubChem | TARTARUS	B(i)
263	pol_pos_1835	_	C00011055: (2-exo,3-endo)-2,3-dimethyl-Bicyclo[2.2.1]heptan-2-ol | |	_	_	_	_	_	_	_	_	_	_	_	_		Arabidopsis;	knapsak | PubChem | TARTARUS	B(i)	C0001105
264	pol_pos_1892	_	| C00651: 4-Methylene-L-glutamate |	_	_	_	_	_	_	_	_	_	_	_	_		Arabidopsis;	knapsak | PubChem | TARTARUS	B(i)
265	pol_pos_2006	_	| | D-2-Aminoadipic acid OR O-Acetyl-L-homoserine	_	_	_	_	_	_	_	_	_	_	_	_		Arabidopsis;	knapsak | PubChem | TARTARUS	B(i)
266	pol_pos_2008	_	C00007400: 5-Methylthiopentanaldoxime | C19095: Ethiolate | C17246: 6-Methylthiohexanaldoxime |	_	_	_	_	_	_	_	_	_	_	_	_		Arabidopsis;	knapsak | PubChem | TARTARUS	B(i)	C0000740
267	pol_pos_2043	_	C00000247: Caudoxirene | C00000251: Lamoxirene;1-(1,2-cis-Epoxybut-3-enyl)-cyclohepta-2,5-diene | |	_	_	_	_	_	_	_	_	_	_	_	_		Arabidopsis;	knapsak | PubChem | TARTARUS	B(i)	C0000024
268	pol_pos_2070	_	C00018586: WF 5239 | C05834: 3-Hydroxy-3-methyloxindole | C19567: 4-Oxo-1-(3-pyridyl)-1-butanone |	_	_	_	_	_	_	_	_	_	_	_	_		Arabidopsis;	knapsak | PubChem | TARTARUS	B(i)	C0001858
269	pol_pos_2125	_	| C02230: 2-Amino-3,7-dihydro-3-methyl-6H-purin-6-one, 3-Methylguanine |	_	_	_	_	_	_	_	_	_	_	_	_		Arabidopsis;	knapsak | PubChem | TARTARUS	B(i)
270	pol_pos_2172	_	C00002666: Piperonal | C02137: 2-Oxo-2-phenylacetate, Benzoylformate, Phenylglyoxylic acid | C03057: 2-Formylbenzoate, o-Formylbenzoic acid | C10812: Piperonal |	_	_	_	_	_	_	_	_	_	_	_	_		Arabidopsis;	knapsak | PubChem | TARTARUS	B(i)	C0000266
271	pol_pos_2191	_	C00007301: Urate;Uric acid | C00366: 69-93-2, Urate |	_	_	_	_	_	_	_	_	_	_	_	_		Arabidopsis;	knapsak | PubChem | TARTARUS	B(i)	C0000730
272	pol_pos_2405	_	| C00437: N-Acetylornithine | C01047: L-Theanine |	_	_	_	_	_	_	_	_	_	_	_	_		Arabidopsis;	knapsak | PubChem | TARTARUS	B(i)
273	pol_pos_2410	_	| | L-Arginine	_	_	_	_	_	_	_	_	_	_	_	_		Arabidopsis;	knapsak | PubChem | TARTARUS	B(i)
274	pol_pos_2434	_	| C02617: 1,4-Naphthalenedione | C14783: 1,2-Naphthalenedione |	_	_	_	_	_	_	_	_	_	_	_	_		Arabidopsis;	knapsak | PubChem | TARTARUS	B(i)
275	pol_pos_2442	_	C00001348: L-Citrulline | C00018858: O-(L-Norvalyl-5)isourea | C00327: 2-Amino-5-ureidovaleric acid, L-Citrulline | D07706: L-Citrulline (DCF) |	_	_	_	_	_	_	_	_	_	_	_	_		Arabidopsis;	knapsak | PubChem | TARTARUS	B(i)	C0000134
276	pol_pos_2443	_	C00007399: 6-Methylthiohexanaldoxime;Heptanal,7-(methylthio)-,oxime | C17249: 7-(Methylsulfanyl)heptanal oxime |	_	_	_	_	_	_	_	_	_	_	_	_		Arabidopsis;	knapsak | PubChem | TARTARUS	B(i)	C0000739
277	pol_pos_2491	_	| C04050: 4-Hydroxyaminoquinoline N-oxide | C07899: Pemoline |	_	_	_	_	_	_	_	_	_	_	_	_		Arabidopsis;	knapsak | PubChem | TARTARUS	B(i)
278	pol_pos_2498	_	| C18744: Metaldehyde |	_	_	_	_	_	_	_	_	_	_	_	_		Arabidopsis;	knapsak | PubChem | TARTARUS	B(i)
279	pol_pos_2525	_	C00007594: Dihomomethionine | |	_	_	_	_	_	_	_	_	_	_	_	_		Arabidopsis;	knapsak | PubChem | TARTARUS	B(i)	C0000759
280	pol_pos_2527	_	C00001986: Valerianine | C07432: Phenmetrazine | C09991: Valerianine |	_	_	_	_	_	_	_	_	_	_	_	_		Arabidopsis;	knapsak | PubChem | TARTARUS	B(i)	C0000198
281	pol_pos_2543	_	| C01419: Cys-Gly |	_	_	_	_	_	_	_	_	_	_	_	_		Arabidopsis;	knapsak | PubChem | TARTARUS	B(i)
282	pol_pos_2555	_	| | 4-Hydroxy-3-methoxycinnamaldehyde	_	_	_	_	_	_	_	_	_	_	_	_		Arabidopsis;	knapsak | PubChem | TARTARUS	B(i)
283	pol_pos_2593	_	| C16675: 7-Aminomethyl-7-carbaguanine |	_	_	_	_	_	_	_	_	_	_	_	_		Arabidopsis;	knapsak | PubChem | TARTARUS	B(i)
284	pol_pos_2625	_	C00000319: Dihydroactinidiolide | C00010869: Limonenecarboxylic acid | C00010909: 5-(1-Methoxy-1-methylethyl)-2-methyl-phenol;NSC 379495 | C00021848: Nortricycloekasantalic acid;eka-Nortricyclosantalic acid | C03929: 3-tert-Butyl-5-methylcatechol |	_	_	_	_	_	_	_	_	_	_	_	_		Arabidopsis;	knapsak | PubChem | TARTARUS	B(i)	C0000031
285	pol_pos_263	_	| C03248: Acetylenedicarboxylate |	_	_	_	_	_	_	_	_	_	_	_	_		Arabidopsis;	knapsak | PubChem | TARTARUS	B(i)
286	pol_pos_2704	_	C00000114: Indole-3-ethanol;Tryptophol | C00001964: Boschniakine | C00955: Indole-3-ethanol | C09915: (R)-6,7-Dihydro-7-methyl-5H-2-pyrindine-4-carbaldehyde, Boschniakine |	_	_	_	_	_	_	_	_	_	_	_	_		Arabidopsis;	knapsak | PubChem | TARTARUS	B(i)	C0000011
287	pol_pos_2718	_	C00019657: 3-Phosphonooxypyruvate;Phosphohydroxypyruvic acid | C03232: 3-Phosphohydroxypyruvate, 3-Phosphonooxypyruvate |	_	_	_	_	_	_	_	_	_	_	_	_		Arabidopsis;	knapsak | PubChem | TARTARUS	B(i)	C0001965
288	pol_pos_2744	_	| C14148: 2-Hydroxy-4-amino-6-(cyclopropylamino)-1,3,5-triazine, N-Cyclopropylammeline |	_	_	_	_	_	_	_	_	_	_	_	_		Arabidopsis;	knapsak | PubChem | TARTARUS	B(i)
289	pol_pos_2756	_	C00000798: Phosphoenolpyruvic acid;Phosphoenolpyruvate;PEP | C00000801: Phosphonopyruvic acid;Phosphonopyruvate;PnPy | C00074: PEP, Phosphoenolpyruvic acid | C02798: 3-Phosphonopyruvate |	_	_	_	_	_	_	_	_	_	_	_	_		Arabidopsis;	knapsak | PubChem | TARTARUS	B(i)	C0000079
290	pol_pos_2899	_	C00001364: L-Homoarginine | C00018080: 2-Methyl-L-arginine;L-alpha-Methylarginine | C01924: Homoarginine |	_	_	_	_	_	_	_	_	_	_	_	_		Arabidopsis;	knapsak | PubChem | TARTARUS	B(i)	C0000136
291	pol_pos_2900	_	| | N-epsilon,N-epsilon,N-epsilon-Trimethyllysine	_	_	_	_	_	_	_	_	_	_	_	_		Arabidopsis;	knapsak | PubChem | TARTARUS	B(i)
292	pol_pos_292	_	| | Proline	_	_	_	_	_	_	_	_	_	_	_	_		Arabidopsis;	knapsak | PubChem | TARTARUS	B(i)
293	pol_pos_2930	_	C00007676: 8-Methylthiooctanaldoxime | C11081: EPTC | C17251: 8-Methylthiooctanaldoxime |	_	_	_	_	_	_	_	_	_	_	_	_		Arabidopsis;	knapsak | PubChem | TARTARUS	B(i)	C0000767
294	pol_pos_3002	_	C00001177: cis-Aconitic acid | C00007380: L-Dehydroascorbate | C00417: cis-Aconitate | C02341: trans-Aconitate | C05422: Dehydroascorbate, L-Dehydroascorbate |	_	_	_	_	_	_	_	_	_	_	_	_		Arabidopsis;	knapsak | PubChem | TARTARUS	B(i)	C0000117
295	pol_pos_3028	_	| C05515: 4-Ureido-5-imidazolecarboxylic acid |	_	_	_	_	_	_	_	_	_	_	_	_		Arabidopsis;	knapsak | PubChem | TARTARUS	B(i)
296	pol_pos_3052	_	C00001201: Quinic acid | C00296: (-)-Quinic acid, Kinic acid, L-Quinic acid, Quinic acid | C01295: 2D-5-O-Methyl-2,3,5/4,6-pentahydroxycyclohexanone |	_	_	_	_	_	_	_	_	_	_	_	_		Arabidopsis;	knapsak | PubChem | TARTARUS	B(i)	C0000120
297	pol_pos_31	_	| | (S)-alpha-Amino-gamma-butyrolactone OR 1-Aminocyclopropanecarboxylic acid	_	_	_	_	_	_	_	_	_	_	_	_		Arabidopsis;	knapsak | PubChem | TARTARUS	B(i)
298	pol_pos_3152	_	| C20142: Acridone | C14591: 4-(2-Benzofuranyl)pyridine |	_	_	_	_	_	_	_	_	_	_	_	_		Arabidopsis;	knapsak | PubChem | TARTARUS	B(i)
299	pol_pos_3197	_	| C02997: N-Acetyl-L-histidine | C19430: 2-[(4-Amino-2-nitrophenyl)amino]-ethanol |	_	_	_	_	_	_	_	_	_	_	_	_		Arabidopsis;	knapsak | PubChem | TARTARUS	B(i)
300	pol_pos_3201	_	C00001249: (Z,Z,Z)-3,6,9-Dodecatrien-1-ol | C00011950: 5-(1-Methylethyl)-2-propyl-2-cyclohexen-1-one | C08375: (3Z,6Z,9Z)-3,6,9-Dodecatrien-1-ol |	_	_	_	_	_	_	_	_	_	_	_	_		Arabidopsis;	knapsak | PubChem | TARTARUS	B(i)	C0000124
301	pol_pos_3231	_	C00002674: Syringic acid;4-Hydroxy-3,5-dimethoxybenzoic acid | C00015909: FR 198248 | C01207: 3-(3,4-Dihydroxyphenyl)lactate | C05584: 3-Methoxy-4-hydroxymandelate | C10833: 4-Hydroxy-3,5-dimethoxybenzoate, Syringate |	_	_	_	_	_	_	_	_	_	_	_	_		Arabidopsis;	knapsak | PubChem | TARTARUS	B(i)	C0000267
302	pol_pos_3338	_	| | Mannose	_	_	_	_	_	_	_	_	_	_	_	_		Arabidopsis;	knapsak | PubChem | TARTARUS	B(i)
303	pol_pos_3394	_	C00007677: 9-Methylthiononanaldoxime | C18755: Pebulate | C19097: Vernolate | C17253: 9-Methylthiononanaldoxime |	_	_	_	_	_	_	_	_	_	_	_	_		Arabidopsis;	knapsak | PubChem | TARTARUS	B(i)	C0000767
304	pol_pos_3434	_	C00002699: 4'-Hydroxy-3'-phenylacetophenone | C00021681: Norpinguisone | C02061: Plastoquinone |	_	_	_	_	_	_	_	_	_	_	_	_		Arabidopsis;	knapsak | PubChem | TARTARUS	B(i)	C0000269
305	pol_pos_3451	_	| C11142: 67-71-0, Dimethyl sulfone |	_	_	_	_	_	_	_	_	_	_	_	_		Arabidopsis;	knapsak | PubChem | TARTARUS	B(i)
306	pol_pos_3459	_	| | Indole-3-lactic acid	_	_	_	_	_	_	_	_	_	_	_	_		Arabidopsis;	knapsak | PubChem | TARTARUS	B(i)
307	pol_pos_346	_	| | Valine	_	_	_	_	_	_	_	_	_	_	_	_		Arabidopsis;	knapsak | PubChem | TARTARUS	B(i)
308	pol_pos_347	_	| | Betaine	_	_	_	_	_	_	_	_	_	_	_	_		Arabidopsis;	knapsak | PubChem | TARTARUS	B(i)
309	pol_pos_3485	_	| C01990: 3-Oxalomalate |	_	_	_	_	_	_	_	_	_	_	_	_		Arabidopsis;	knapsak | PubChem | TARTARUS	B(i)
310	pol_pos_3494	_	C00007397: 3-Indolylmethylthiohydroximate | |	_	_	_	_	_	_	_	_	_	_	_	_		Arabidopsis;	knapsak | PubChem | TARTARUS	B(i)	C0000739
311	pol_pos_3522	_	C00002758: p-Methoxycinnamic acid ethyl ester | C00015215: Sterin B | C00017460: Narchinol A | C04000: Benzyl 2-methyl-3-oxobutanoate | C10476: Ethyl p-methoxycinnamate | C12458: 3-Dimethylallyl-4-hydroxybenzoate | C14567: 93-28-7 |	_	_	_	_	_	_	_	_	_	_	_	_		Arabidopsis;	knapsak | PubChem | TARTARUS	B(i)	C0000275
312	pol_pos_3534	_	| C02427: L-Homocitrulline |	_	_	_	_	_	_	_	_	_	_	_	_		Arabidopsis;	knapsak | PubChem | TARTARUS	B(i)
313	pol_pos_3556	_	| C01252: 4-(2-Aminophenyl)-2,4-dioxobutanoate | C05835: 2-Formaminobenzoylacetate | C12466: 3-Amino-4,7-dihydroxy-8-methylcoumarin | C14801: 1,2-Dihydro-5-nitro-1,2-naphthalenediol |	_	_	_	_	_	_	_	_	_	_	_	_		Arabidopsis;	knapsak | PubChem | TARTARUS	B(i)
314	pol_pos_3563	_	| C00579: Dihydrolipoamide |	_	_	_	_	_	_	_	_	_	_	_	_		Arabidopsis;	knapsak | PubChem | TARTARUS	B(i)
315	pol_pos_3610	_	| C01215: 2-(Acetamidomethylene)succinate |	_	_	_	_	_	_	_	_	_	_	_	_		Arabidopsis;	knapsak | PubChem | TARTARUS	B(i)
316	pol_pos_3619	_	| C03710: N-Benzyloxycarbonylglycine | C05596: 4-Hydroxyphenylacetylglycine, p-Hydroxyphenylacetylglycine |	_	_	_	_	_	_	_	_	_	_	_	_		Arabidopsis;	knapsak | PubChem | TARTARUS	B(i)
317	pol_pos_3626	_	| C12231: Anhalamine, N-Demethylanhalidine | D04476: 50-19-1, Hydroxyphenamate (USAN) | C14262: 4'-Ethoxylactanilide, p-Lactophenetide | C14334: Aprocarb, Propoxur |	_	_	_	_	_	_	_	_	_	_	_	_		Arabidopsis;	knapsak | PubChem | TARTARUS	B(i)
318	pol_pos_3630	_	C00001245: Dimethyl disulfide | C08371: Dimethyl disulfide |	_	_	_	_	_	_	_	_	_	_	_	_		Arabidopsis;	knapsak | PubChem | TARTARUS	B(i)	C0000124
319	pol_pos_3822	_	C00007292: 1-Deoxy-D-xylulose 5-phosphate | C00672: 2-Deoxy-alpha-D-ribose 1-phosphate | C00673: 2-Deoxy-D-ribose 5-phosphate | C11437: 1-Deoxy-D-xylulose 5-phosphate | C16637: 5-Deoxy-alpha-D-ribose-1-phosphate |	_	_	_	_	_	_	_	_	_	_	_	_		Arabidopsis;	knapsak | PubChem | TARTARUS	B(i)	C0000729
320	pol_pos_385	_	| | (S)-(+)-2-Amino-2-methyl-3-hydroxypropanoic acid	_	_	_	_	_	_	_	_	_	_	_	_		Arabidopsis;	knapsak | PubChem | TARTARUS	B(i)
321	pol_pos_3851	_	C00001554: Tenuazonic acid | C08511: Pyrrole-2,4-diol, 3-acetyl-5-sec-butyl- |	_	_	_	_	_	_	_	_	_	_	_	_		Arabidopsis;	knapsak | PubChem | TARTARUS	B(i)	C0000155
322	pol_pos_3916	_	| C06114: gamma-Glutamyl-beta-aminopropiononitrile |	_	_	_	_	_	_	_	_	_	_	_	_		Arabidopsis;	knapsak | PubChem | TARTARUS	B(i)
323	pol_pos_3937	_	| C18590: Pymetrozine |	_	_	_	_	_	_	_	_	_	_	_	_		Arabidopsis;	knapsak | PubChem | TARTARUS	B(i)
324	pol_pos_3960	_	| C14569: 4,4'-Biphenyldithiol, 4,4'-Thiobiphenyl |	_	_	_	_	_	_	_	_	_	_	_	_		Arabidopsis;	knapsak | PubChem | TARTARUS	B(i)
325	pol_pos_3981	_	C00018021: Siastatin B | C03738: gamma-L-Glutamyl-D-alanine |	_	_	_	_	_	_	_	_	_	_	_	_		Arabidopsis;	knapsak | PubChem | TARTARUS	B(i)	C0001802
326	pol_pos_4017	_	| | Pantothenic acid (Vitamine B5)	_	_	_	_	_	_	_	_	_	_	_	_		Arabidopsis;	knapsak | PubChem | TARTARUS	B(i)
327	pol_pos_4053	_	C00002018: Anibine | C00007571: Indolepyruvate;IPA | C00331: (Indol-3-yl)pyruvate, Indole-3-pyruvate, Indolepyruvic acid |	_	_	_	_	_	_	_	_	_	_	_	_		Arabidopsis;	knapsak | PubChem | TARTARUS	B(i)	C0000201
328	pol_pos_4076	_	C00019583: N-Acetyl-D-mannosamine;2-Acetamido-2-deoxy-D-mannose | C00140: 2-Acetamido-2-deoxy-D-glucose, N-Acetyl-D-glucosamine | C00645: 2-Acetamido-2-deoxy-D-mannose | C01132: 2-Acetamido-2-deoxy-D-galactose, N-Acetyl-D-chondrosamine |	_	_	_	_	_	_	_	_	_	_	_	_		Arabidopsis;	knapsak | PubChem | TARTARUS	B(i)	C0001958
329	pol_pos_4165	_	| C18509: Dinotefuran |	_	_	_	_	_	_	_	_	_	_	_	_		Arabidopsis;	knapsak | PubChem | TARTARUS	B(i)
330	pol_pos_4186	_	C00000730: 4-Amino-4-deoxychorismic acid;4-Amino-4-deoxychorismate | C11355: 4-Amino-4-deoxychorismate | C18054: (2S)-2-Amino-4-deoxychorismate |	_	_	_	_	_	_	_	_	_	_	_	_		Arabidopsis;	knapsak | PubChem | TARTARUS	B(i)	C0000073
331	pol_pos_4218	_	C00000793: N-Acethyldemethylphosphinothricin;N-AcDMPT | |	_	_	_	_	_	_	_	_	_	_	_	_		Arabidopsis;	knapsak | PubChem | TARTARUS	B(i)	C0000079
332	pol_pos_4239	_	| C05655: 5-(2'-Carboxyethyl)-4,6-dihydroxypicolinate | C06047: Stizolobate | C06048: Stizolobinate |	_	_	_	_	_	_	_	_	_	_	_	_		Arabidopsis;	knapsak | PubChem | TARTARUS	B(i)
333	pol_pos_4246	_	C00007641: Tetrahomomethionine | |	_	_	_	_	_	_	_	_	_	_	_	_		Arabidopsis;	knapsak | PubChem | TARTARUS	B(i)	C0000764
334	pol_pos_4266	_	C00007304: Mevalonate 5-phosphate | C01107: (R)-5-Phosphomevalonate, (R)-Mevalonic acid 5-phosphate | C18911: (R)-4-Phosphopantoate |	_	_	_	_	_	_	_	_	_	_	_	_		Arabidopsis;	knapsak | PubChem | TARTARUS	B(i)	C0000730
335	pol_pos_4312	_	| C02147: Dihydrolipoate, Dihydrothioctic acid |	_	_	_	_	_	_	_	_	_	_	_	_		Arabidopsis;	knapsak | PubChem | TARTARUS	B(i)
336	pol_pos_4383	_	| C18251: 4,5-Pyrenequinone | C18257: 1,6-Pyrenequinone | C18258: 1,8-Pyrenequinone |	_	_	_	_	_	_	_	_	_	_	_	_		Arabidopsis;	knapsak | PubChem | TARTARUS	B(i)
337	pol_pos_4388	_	| | Glucoheptose	_	_	_	_	_	_	_	_	_	_	_	_		Arabidopsis;	knapsak | PubChem | TARTARUS	B(i)
338	pol_pos_4391	_	C00002195: Robustine | C10736: Furo(2,3-b)quinolin-8-ol, 4-methoxy- |	_	_	_	_	_	_	_	_	_	_	_	_		Arabidopsis;	knapsak | PubChem | TARTARUS	B(i)	C0000219
339	pol_pos_440	_	| | Phenethylamine	_	_	_	_	_	_	_	_	_	_	_	_		Arabidopsis;	knapsak | PubChem | TARTARUS	B(i)
340	pol_pos_4481	_	| C02389: 4-Hydroxyphenoxy radical, p-Benzosemiquinone | C05060: 2-Hydroxyphenoxy radical, o-Benzosemiquinone |	_	_	_	_	_	_	_	_	_	_	_	_		Arabidopsis;	knapsak | PubChem | TARTARUS	B(i)
341	pol_pos_4535	_	| C00835: Sepiapterin | C03684: 6-(1,2-Dioxopropyl)-5,6,7,8-tetrahydropterin, 6-Pyruvoyltetrahydropterin | C06313: 2-Amino-6-(1,2-dihydroxypropyl)-4(1H)-pteridinone, Biopterin |	_	_	_	_	_	_	_	_	_	_	_	_		Arabidopsis;	knapsak | PubChem | TARTARUS	B(i)
342	pol_pos_4547	_	| D05075: 96-27-5, Monothioglycerol (NF) |	_	_	_	_	_	_	_	_	_	_	_	_		Arabidopsis;	knapsak | PubChem | TARTARUS	B(i)
343	pol_pos_4550	_	| C17359: 8-Hydroxyalanylclavam |	_	_	_	_	_	_	_	_	_	_	_	_		Arabidopsis;	knapsak | PubChem | TARTARUS	B(i)
344	pol_pos_4578	_	| C11033: 1-Aminomethylphosphonic acid, AMPA |	_	_	_	_	_	_	_	_	_	_	_	_		Arabidopsis;	knapsak | PubChem | TARTARUS	B(i)
345	pol_pos_4582	_	| C19930: TBPS, tert-Butylbicyclophosphorothionate |	_	_	_	_	_	_	_	_	_	_	_	_		Arabidopsis;	knapsak | PubChem | TARTARUS	B(i)
346	pol_pos_4625	_	| | Pantothenic acid (Vitamine B5)	_	_	_	_	_	_	_	_	_	_	_	_		Arabidopsis;	knapsak | PubChem | TARTARUS	B(i)
347	pol_pos_4650	_	| C03366: 5-Phosphonooxy-L-lysine, O-Phosphohydroxy-L-lysine | C03828: 2-Deoxystreptamine phospahte | C03980: 2-Deoxystreptamine 4-phosphate |	_	_	_	_	_	_	_	_	_	_	_	_		Arabidopsis;	knapsak | PubChem | TARTARUS	B(i)
348	pol_pos_4668	_	| | Cytidine	_	_	_	_	_	_	_	_	_	_	_	_		Arabidopsis;	knapsak | PubChem | TARTARUS	B(i)
349	pol_pos_468	_	| | 2-Picolinic acid OR Nicotinic acid	_	_	_	_	_	_	_	_	_	_	_	_		Arabidopsis;	knapsak | PubChem | TARTARUS	B(i)
350	pol_pos_4713	_	C00007614: Isochorismate | |	_	_	_	_	_	_	_	_	_	_	_	_		Arabidopsis;	knapsak | PubChem | TARTARUS	B(i)	C0000761
351	pol_pos_4745	_	| D01166: Mafenide acetate (JAN/USP) |	_	_	_	_	_	_	_	_	_	_	_	_		Arabidopsis;	knapsak | PubChem | TARTARUS	B(i)
352	pol_pos_4753	_	| C19972: 2,4-Bis(acetamido)-2,4,6-trideoxy-beta-L-altropyranose |	_	_	_	_	_	_	_	_	_	_	_	_		Arabidopsis;	knapsak | PubChem | TARTARUS	B(i)
353	pol_pos_4810	_	C00000971: 7-Hydroxyflavan | C00002813: Deoxylapachol | C00002898: Pinosylvin methyl ether;3-Hydroxy-5-methoxystilbene | C00017462: 14-Nordehydrocalohastine | C02345: (2S)-Flavan-4-ol | C10325: Deoxylapachol | C13632: 4,4'-Dihydroxy-alpha-methylstilbene |	_	_	_	_	_	_	_	_	_	_	_	_		Arabidopsis;	knapsak | PubChem | TARTARUS	B(i)	C0000097
354	pol_pos_483	_	| C06756: 1,4-Dimethylbenzene, p-Xylene | C07111: Ethylbenzene, Ethylenzene | C07208: 1,3-Dimethylbenzene, m-Xylene | C07212: 95-47-6, o-Dimethylbenzene, o-Xylene |	_	_	_	_	_	_	_	_	_	_	_	_		Arabidopsis;	knapsak | PubChem | TARTARUS	B(i)
355	pol_pos_4835	_	| C01136: 6-S-Acetyldihydrolipoamide, S-Acetyldihydrolipoamide |	_	_	_	_	_	_	_	_	_	_	_	_		Arabidopsis;	knapsak | PubChem | TARTARUS	B(i)
356	pol_pos_4838	_	C00007651: 2-Oxo-10-methylthiodecaonoic acid;10Methylthio-2-decanoic acid | C17232: 10-Methylthio-2-decanoic acid |	_	_	_	_	_	_	_	_	_	_	_	_		Arabidopsis;	knapsak | PubChem | TARTARUS	B(i)	C0000765
357	pol_pos_4848	_	C00007507: L-gamma-Glutamyl-L-cysteine | C00669: 5-L-Glutamyl-L-cysteine, gamma-Glutamylcysteine |	_	_	_	_	_	_	_	_	_	_	_	_		Arabidopsis;	knapsak | PubChem | TARTARUS	B(i)	C0000750
358	pol_pos_4875	_	| C06470: 3-O-alpha-Carboxyethyl-D-glucosamine, Muramic acid |	_	_	_	_	_	_	_	_	_	_	_	_		Arabidopsis;	knapsak | PubChem | TARTARUS	B(i)
359	pol_pos_488	_	C00000799: Phosphonoacetaldehyde | C03167: 2-Phosphonoacetaldehyde, Phosphonoacetaldehyde |	_	_	_	_	_	_	_	_	_	_	_	_		Arabidopsis;	knapsak | PubChem | TARTARUS	B(i)	C0000079
360	pol_pos_4906	_	C00016181: CI 4 | |	_	_	_	_	_	_	_	_	_	_	_	_		Arabidopsis;	knapsak | PubChem | TARTARUS	B(i)	C0001618
361	pol_pos_4922	_	| C16582: 2-Hydroxyfelbamate |	_	_	_	_	_	_	_	_	_	_	_	_		Arabidopsis;	knapsak | PubChem | TARTARUS	B(i)
362	pol_pos_4923	_	| C16622: Diacetylhydrazine | C19283: 59-89-2, N-Nitrosomorpholine | C19484: 3-(Methylnitrosoamino)-propanal |	_	_	_	_	_	_	_	_	_	_	_	_		Arabidopsis;	knapsak | PubChem | TARTARUS	B(i)
363	pol_pos_4934	_	C00018684: 3-Nitro-propionic acid;BNP;Bovinocidin;Hiptagenic acid;NSC 64266 | C00872: Aminomalonate | C03071: 3-aci-Nitropropanoate | C05669: 3-Nitropropanoate, beta-Nitropropanoate, beta-Nitropropionic acid |	_	_	_	_	_	_	_	_	_	_	_	_		Arabidopsis;	knapsak | PubChem | TARTARUS	B(i)	C0001868
364	pol_pos_4940	_	| C19247: 2,2'-[[4-(Methylamino)-3-nitrophenyl]imino]bisethanol |	_	_	_	_	_	_	_	_	_	_	_	_		Arabidopsis;	knapsak | PubChem | TARTARUS	B(i)
365	pol_pos_4942	_	| C06123: 2-trans-Hexadecenal, Hexadecenal |	_	_	_	_	_	_	_	_	_	_	_	_		Arabidopsis;	knapsak | PubChem | TARTARUS	B(i)
366	pol_pos_5001	_	C00001205: Succinic acid | C00042: Succinate | C02170: Methylmalonate | C10900: Methyl oxalate |	_	_	_	_	_	_	_	_	_	_	_	_		Arabidopsis;	knapsak | PubChem | TARTARUS	B(i)	C0000120
367	pol_pos_5021	_	| D04439: Hexylene glycol (NF) |	_	_	_	_	_	_	_	_	_	_	_	_		Arabidopsis;	knapsak | PubChem | TARTARUS	B(i)
368	pol_pos_5088	_	C00001508: 5-Ribosyluracil | C00019674: Uridine | C00299: 58-96-8, Uridine | C02067: Pseudouridine | C16745: Spongouridine |	_	_	_	_	_	_	_	_	_	_	_	_		Arabidopsis;	knapsak | PubChem | TARTARUS	B(i)	C0000150
369	pol_pos_5090	_	C00000756: Biotin | C00120: 58-85-5, D-Biotin | D00029: 58-85-5, Biotin (JP16/USP/INN) |	_	_	_	_	_	_	_	_	_	_	_	_		Arabidopsis;	knapsak | PubChem | TARTARUS	B(i)	C0000075
370	pol_pos_5113	_	C00017058: (Z,E,E,E,E)-5-(2,4,6,12-Tetradecatetraene-8,10-diynylidene)-2(5H)-furanone;Xerulin | C18260: 1,6-Dimethoxypyrene |	_	_	_	_	_	_	_	_	_	_	_	_		Arabidopsis;	knapsak | PubChem | TARTARUS	B(i)	C0001705
371	pol_pos_5194	_	C00001547: Miserotoxin | C08507: Miserotoxin |	_	_	_	_	_	_	_	_	_	_	_	_		Arabidopsis;	knapsak | PubChem | TARTARUS	B(i)	C0000154
372	pol_pos_5201	_	| C15464: (+)-12-(2-Cyclopenten-1-yl)-2-dodecanone |	_	_	_	_	_	_	_	_	_	_	_	_		Arabidopsis;	knapsak | PubChem | TARTARUS	B(i)
373	pol_pos_5236	_	| C17515: CAP-A, N-(13-Methyltetradecyl)acetamide |	_	_	_	_	_	_	_	_	_	_	_	_		Arabidopsis;	knapsak | PubChem | TARTARUS	B(i)
374	pol_pos_5325	_	| C01620: (2R,3S)-2,3,4-Trihydroxybutanoic acid, Threonate |	_	_	_	_	_	_	_	_	_	_	_	_		Arabidopsis;	knapsak | PubChem | TARTARUS	B(i)
375	pol_pos_5348	_	C00000916: 2-Hydroxyethylphosphonic acid;HEP | C06451: (2-Hydroxyethyl)-phosphonic acid |	_	_	_	_	_	_	_	_	_	_	_	_		Arabidopsis;	knapsak | PubChem | TARTARUS	B(i)	C0000091
376	pol_pos_5366	_	| C15522: (6R)-6-(L-erythro-1,2-Dihydroxypropyl)-5,6,7,8-tetrahydro-4a-hydroxypterin, 4a-Hydroxytetrahydrobiopterin |	_	_	_	_	_	_	_	_	_	_	_	_		Arabidopsis;	knapsak | PubChem | TARTARUS	B(i)
377	pol_pos_5383	_	| C05283: (5-L-Glutamyl)-L-glutamine |	_	_	_	_	_	_	_	_	_	_	_	_		Arabidopsis;	knapsak | PubChem | TARTARUS	B(i)
378	pol_pos_5411	_	| C01425: Glu-Glu, L-alpha-Glutamyl-L-glutamic acid | C05282: (5-L-Glutamyl)-L-glutamate |	_	_	_	_	_	_	_	_	_	_	_	_		Arabidopsis;	knapsak | PubChem | TARTARUS	B(i)
379	pol_pos_5419	_	| C04498: N-(4-Guanidinobutyl)-4-hydroxycinnamide |	_	_	_	_	_	_	_	_	_	_	_	_		Arabidopsis;	knapsak | PubChem | TARTARUS	B(i)
380	pol_pos_5468	_	| C01545: 1-Caprylaldehyde, 1-Octanal | C07288: 6-Methylhept-5-en-2-ol, Sulcatol | C14272: 1-Octen-3-ol |	_	_	_	_	_	_	_	_	_	_	_	_		Arabidopsis;	knapsak | PubChem | TARTARUS	B(i)
381	pol_pos_5545	_	C00001496: Crotonoside | C00019679: 9-beta-D-Ribofuranosylguanine | C00387: Guanosine | C08432: Crotonoside |	_	_	_	_	_	_	_	_	_	_	_	_		Arabidopsis;	knapsak | PubChem | TARTARUS	B(i)	C0000149
382	pol_pos_564	_	| C03458: 2,3,6-Trihydroxypyridine | C19721: 5-Hydroxypyrrole-2-carboxylate |	_	_	_	_	_	_	_	_	_	_	_	_		Arabidopsis;	knapsak | PubChem | TARTARUS	B(i)
383	pol_pos_5682	_	| C07756: (7R)-7-Aminocephalosporanate, 7-Aminocephalosporanic acid |	_	_	_	_	_	_	_	_	_	_	_	_		Arabidopsis;	knapsak | PubChem | TARTARUS	B(i)
384	pol_pos_5745	_	C00002303: Strobamine | C10867: Cyclohepta(6)pyran-5,8-imin-4(5H)-one, 2,3,6,7,8,9-hexahydro-10-methyl-2-phenyl-,(2alpha,5beta,8beta)-(+)- | C18548: Mepronil | C14896: 1-Methyl-6-(1,2,3,4-tetrahydro-6-methoxy-2-naphthyl)-2(1H)-pyridone | C15044: 2,3-Dimethoxy-[2-(4-Pyridinyl)-1-butenyl]phenol |	_	_	_	_	_	_	_	_	_	_	_	_		Arabidopsis;	knapsak | PubChem | TARTARUS	B(i)	C0000230
385	pol_pos_5758	_	C00000747: L-S-methylcysteine | C00001365: L-Homocysteine | C00155: L-2-Amino-4-mercaptobutyric acid | C05330: 2-Amino-4-mercaptobutyric acid | D08164: Mecysteine (INN) |	_	_	_	_	_	_	_	_	_	_	_	_		Arabidopsis;	knapsak | PubChem | TARTARUS	B(i)	C0000074
386	pol_pos_5822	_	C00019655: Aminoimidazole ribonucleotide;AIR (nucleotide);5-Amino-1-beta-D-ribofuranosyl-5'-(dihydrogen phosphate)-imidazole | C03373: 1-(5'-Phosphoribosyl)-5-aminoimidazole, 5-Amino-1-(5-phospho-D-ribosyl)imidazole, Aminoimidazole ribotide |	_	_	_	_	_	_	_	_	_	_	_	_		Arabidopsis;	knapsak | PubChem | TARTARUS	B(i)	C0001965
387	pol_pos_5824	_	C00002281: Brugine | |	_	_	_	_	_	_	_	_	_	_	_	_		Arabidopsis;	knapsak | PubChem | TARTARUS	B(i)	C0000228
388	pol_pos_5825	_	| C03349: 3-Amino-1-propanesulfonic acid | D06202: Tramiprosate (USAN) |	_	_	_	_	_	_	_	_	_	_	_	_		Arabidopsis;	knapsak | PubChem | TARTARUS	B(i)
389	pol_pos_5833	_	C00009760: Medicagol;3-Hydroxy-8,9-methylenedioxycoumestan;7-Hydroxy-11,12-methylenedioxycoumestan | |	_	_	_	_	_	_	_	_	_	_	_	_		Arabidopsis;	knapsak | PubChem | TARTARUS	B(i)	C0000976
390	pol_pos_5847	_	C00007436: 1,7,16-Hexadecanetriol | |	_	_	_	_	_	_	_	_	_	_	_	_		Arabidopsis;	knapsak | PubChem | TARTARUS	B(i)	C0000743
391	pol_pos_5861	_	| C00170: 5'-Methylthioadenosine, Methylthioadenosine, Thiomethyladenosine |	_	_	_	_	_	_	_	_	_	_	_	_		Arabidopsis;	knapsak | PubChem | TARTARUS	B(i)
392	pol_pos_5905	_	| C00346: Ethanolamine phosphate, O-Phosphorylethanolamine | C05678: 1-Hydroxy-2-aminoethylphosphonate |	_	_	_	_	_	_	_	_	_	_	_	_		Arabidopsis;	knapsak | PubChem | TARTARUS	B(i)
393	pol_pos_5932	_	C00013198: Ivangulin;[3aR-[3aalpha,5(S*),7aalpha]]-2,3,3a,4,7,7a-Hexahydro-gamma,6-dimethyl-3-methylene-2-oxo-5-benzofuranbutanoic acid methyl ester | C00013235: Emmotin A;(2R-trans)-3,4-Dihydro-2-hydroxy-3-(1-hydroxy-1-methylethyl)-8-(methoxymethyl)-5-methyl-1(2H)-naphthalenone | C00017302: Ligolide | C00021113: 2-[4-Methyl-2-(2-methylpropoxy)phenyl]-oxiranemethanol acetate | C03343: 2-Ethylhexy…	_	_	_	_	_	_	_	_	_	_	_	_		Arabidopsis;	knapsak | PubChem | TARTARUS	B(i)	C0001319
394	pol_pos_6021	_	| C01630: Xylobiose |	_	_	_	_	_	_	_	_	_	_	_	_		Arabidopsis;	knapsak | PubChem | TARTARUS	B(i)
395	pol_pos_6026	_	| C18469: Imicyafos |	_	_	_	_	_	_	_	_	_	_	_	_		Arabidopsis;	knapsak | PubChem | TARTARUS	B(i)
396	pol_pos_6076	_	| C07576: Psilocybin |	_	_	_	_	_	_	_	_	_	_	_	_		Arabidopsis;	knapsak | PubChem | TARTARUS	B(i)
397	pol_pos_6102	_	| C19324: Aminonitrothiazole |	_	_	_	_	_	_	_	_	_	_	_	_		Arabidopsis;	knapsak | PubChem | TARTARUS	B(i)
398	pol_pos_6110	_	| C04445: 3,4-Dehydrothiomorpholine-3-carboxylate |	_	_	_	_	_	_	_	_	_	_	_	_		Arabidopsis;	knapsak | PubChem | TARTARUS	B(i)
399	pol_pos_6163	_	C00001456: Sarmentosin epoxide | C04521: 2,7-Anhydro-alpha-N-acetylneuraminic acid | C04580: 2-Deoxy-2,3-dehydro-N-acetylneuraminic acid | C08341: Sarmentosin epoxide |	_	_	_	_	_	_	_	_	_	_	_	_		Arabidopsis;	knapsak | PubChem | TARTARUS	B(i)	C0000145
400	pol_pos_6214	_	C00000322: Harringtonolide | C00000716: Anolignan A | C00007961: Ovalitenin B | C00008073: Castillene B | C15051: 7-Hydroxy-3-(4-methoxyphenyl)-4-propylcoumarin |	_	_	_	_	_	_	_	_	_	_	_	_		Arabidopsis;	knapsak | PubChem | TARTARUS	B(i)	C0000032
401	pol_pos_6236	_	C00002865: Tricrozarin A | C10406: Tricrozarin A |	_	_	_	_	_	_	_	_	_	_	_	_		Arabidopsis;	knapsak | PubChem | TARTARUS	B(i)	C0000286
402	pol_pos_6306	_	| C14218: 1,8-Octanediol | C14271: 2-Ethyl-1,3-hexanediol | C14273: 1,2-Dihydroxyoctane |	_	_	_	_	_	_	_	_	_	_	_	_		Arabidopsis;	knapsak | PubChem | TARTARUS	B(i)
403	pol_pos_634	_	| C16817: Goitrin |	_	_	_	_	_	_	_	_	_	_	_	_		Arabidopsis;	knapsak | PubChem | TARTARUS	B(i)
404	pol_pos_6340	_	| C03901: Thiomorpholine 3-carboxylate |	_	_	_	_	_	_	_	_	_	_	_	_		Arabidopsis;	knapsak | PubChem | TARTARUS	B(i)
405	pol_pos_6443	_	| C11474: NTX | C19150: Diethyldithiocarbamic acid |	_	_	_	_	_	_	_	_	_	_	_	_		Arabidopsis;	knapsak | PubChem | TARTARUS	B(i)
406	pol_pos_6498	_	| C00941: 3',5'-Cyclic CMP | C02354: 2',3'-Cyclic CMP |	_	_	_	_	_	_	_	_	_	_	_	_		Arabidopsis;	knapsak | PubChem | TARTARUS	B(i)
407	pol_pos_6582	_	| C19498: Phenicarbazide |	_	_	_	_	_	_	_	_	_	_	_	_		Arabidopsis;	knapsak | PubChem | TARTARUS	B(i)
408	pol_pos_6655	_	| C15523: 2,6-Dihydroxynicotinate |	_	_	_	_	_	_	_	_	_	_	_	_		Arabidopsis;	knapsak | PubChem | TARTARUS	B(i)
409	pol_pos_6746	_	| C03996: 5'-O-beta-D-Glucosylpyridoxine |	_	_	_	_	_	_	_	_	_	_	_	_		Arabidopsis;	knapsak | PubChem | TARTARUS	B(i)
410	pol_pos_681	_	| | Pipecolic acid	_	_	_	_	_	_	_	_	_	_	_	_		Arabidopsis;	knapsak | PubChem | TARTARUS	B(i)
411	pol_pos_6841	_	C00019694: Nicotinamide ribonucleotide;Nicotinamide ribonucleoside 5'-phosphate;NMN | C00455: beta-Nicotinamide mononucleotide, Nicotinamide mononucleotide, Nicotinamide ribonucleotide, NMN |	_	_	_	_	_	_	_	_	_	_	_	_		Arabidopsis;	knapsak | PubChem | TARTARUS	B(i)	C0001969
412	pol_pos_7009	_	| D08366: Phenylephrine tartrate | D08966: Phenylephrine bitartrate (USP) |	_	_	_	_	_	_	_	_	_	_	_	_		Arabidopsis;	knapsak | PubChem | TARTARUS	B(i)
413	pol_pos_7034	_	| C17931: Imetit |	_	_	_	_	_	_	_	_	_	_	_	_		Arabidopsis;	knapsak | PubChem | TARTARUS	B(i)
414	pol_pos_7041	_	| C17985: Istamycin Y0 | C17986: Istamycin X0 |	_	_	_	_	_	_	_	_	_	_	_	_		Arabidopsis;	knapsak | PubChem | TARTARUS	B(i)
415	pol_pos_7054	_	| |	_	_	_	_	_	_	_	_	_	_	_	_		Arabidopsis;	knapsak | PubChem | TARTARUS	B(i)
416	pol_pos_7059	_	C00018292: 3-Trehalosamine | C00018315: X 14847 | C19702: 1-O-(2-Amino-2-deoxy-alpha-D-glucopyranosyl)-1D-myo-inositol | C15658: 6-(alpha-D-Glucosaminyl)-1D-myo-inositol |	_	_	_	_	_	_	_	_	_	_	_	_		Arabidopsis;	knapsak | PubChem | TARTARUS	B(i)	C0001829
417	pol_pos_7072	_	C00001395: Tricholomic acid | C03409: N-Formimino-L-aspartate | C08298: Tricholomic acid |	_	_	_	_	_	_	_	_	_	_	_	_		Arabidopsis;	knapsak | PubChem | TARTARUS	B(i)	C0000139
418	pol_pos_7097	_	| C02768: (Glycerophosphate)n |	_	_	_	_	_	_	_	_	_	_	_	_		Arabidopsis;	knapsak | PubChem | TARTARUS	B(i)
419	pol_pos_7158	_	| C11002: Isofenphos |	_	_	_	_	_	_	_	_	_	_	_	_		Arabidopsis;	knapsak | PubChem | TARTARUS	B(i)
420	pol_pos_7160	_	C00001564: Candimine | C08520: Candimine |	_	_	_	_	_	_	_	_	_	_	_	_		Arabidopsis;	knapsak | PubChem | TARTARUS	B(i)	C0000156
421	pol_pos_7173	_	C00000563: Sterigmatocystin | C00009682: Neobanol | C00961: Sterigmatocystin |	_	_	_	_	_	_	_	_	_	_	_	_		Arabidopsis;	knapsak | PubChem | TARTARUS	B(i)	C0000056
422	pol_pos_7192	_	| | 4-Pregnene-11-beta-17-alpha-diol-3-20-dione OR Corticosterone	_	_	_	_	_	_	_	_	_	_	_	_		Arabidopsis;	knapsak | PubChem | TARTARUS	B(i)
423	pol_pos_7199	_	C00002041: Gerrardine | C10147: Gerrardine |	_	_	_	_	_	_	_	_	_	_	_	_		Arabidopsis;	knapsak | PubChem | TARTARUS	B(i)	C0000204
424	pol_pos_7204	_	| C00943: 3',5'-Cyclic IMP, Inosine 3',5'-cyclic monophosphate |	_	_	_	_	_	_	_	_	_	_	_	_		Arabidopsis;	knapsak | PubChem | TARTARUS	B(i)
425	pol_pos_7231	_	| C11516: 2-(alpha-D-Mannosyl)-3-phosphoglycerate | C16699: 2-O-(6-Phospho-alpha-D-mannosyl)-D-glycerate | C19791: (2R)-2-(alpha-D-glucopyranosyloxy)-3-(phosphonooxy)propanoate |	_	_	_	_	_	_	_	_	_	_	_	_		Arabidopsis;	knapsak | PubChem | TARTARUS	B(i)
426	pol_pos_7254	_	C00001204: Suberic acid | C08278: 1,6-Hexanedicarboxylic acid, Cork acid, Suberic acid | C16658: 2-PGA | C19402: Dimethoxane | C14570: Dimethyl adipate |	_	_	_	_	_	_	_	_	_	_	_	_		Arabidopsis;	knapsak | PubChem | TARTARUS	B(i)	C0000120
427	pol_pos_727	_	C00001400: Agmatine | C00179: (4-Aminobutyl) guanidine, Agmatine |	_	_	_	_	_	_	_	_	_	_	_	_		Arabidopsis;	knapsak | PubChem | TARTARUS	B(i)	C0000140
428	pol_pos_7418	_	| C19621: 9,10,18-Trihydroxystearate |	_	_	_	_	_	_	_	_	_	_	_	_		Arabidopsis;	knapsak | PubChem | TARTARUS	B(i)
429	pol_pos_7490	_	| C18762: Pyridafenthion |	_	_	_	_	_	_	_	_	_	_	_	_		Arabidopsis;	knapsak | PubChem | TARTARUS	B(i)
430	pol_pos_7524	_	| D01792: 1,3,5-Trimethoxybenzene (JAN) |	_	_	_	_	_	_	_	_	_	_	_	_		Arabidopsis;	knapsak | PubChem | TARTARUS	B(i)
431	pol_pos_7533	_	C00001488: Sinigrin;2-Phenylethyl glucosinolate;Allyl glucosinolate | C08427: 2-Propenyl glucosinolate |	_	_	_	_	_	_	_	_	_	_	_	_		Arabidopsis;	knapsak | PubChem | TARTARUS	B(i)	C0000148
432	pol_pos_7543	_	| | D-Gentiobiose OR D-Maltose OR D-Trehalose	_	_	_	_	_	_	_	_	_	_	_	_		Arabidopsis;	knapsak | PubChem | TARTARUS	B(i)
433	pol_pos_7568	_	C00002717: 1-Caffeoyl-4-deoxyquinic acid | C00002730: 4-p-Coumaroylquinic acid | C10432: 1-Caffeoyl-4-deoxyquinic acid | C10441: 4-p-Coumaroylquinic acid | C12208: trans-5-O-(4-Coumaroyl)-D-quinate |	_	_	_	_	_	_	_	_	_	_	_	_		Arabidopsis;	knapsak | PubChem | TARTARUS	B(i)	C0000271
434	pol_pos_762	_	C00001430: Skatole | C02596: 2-Methylbezeneacetonitrile, o-Methylbenzyl cyanide | C08313: 3-Methylindole |	_	_	_	_	_	_	_	_	_	_	_	_		Arabidopsis;	knapsak | PubChem | TARTARUS	B(i)	C0000143
435	pol_pos_7641	_	C00016157: Macrosphelide B | |	_	_	_	_	_	_	_	_	_	_	_	_		Arabidopsis;	knapsak | PubChem | TARTARUS	B(i)	C0001615
436	pol_pos_7682	_	C00000616: Scapaniapyrone A | |	_	_	_	_	_	_	_	_	_	_	_	_		Arabidopsis;	knapsak | PubChem | TARTARUS	B(i)	C0000061
437	pol_pos_7689	_	C00001474: Glucolepidiin;Ethyl glucosinolate | C08413: Ethyl glucosinolate |	_	_	_	_	_	_	_	_	_	_	_	_		Arabidopsis;	knapsak | PubChem | TARTARUS	B(i)	C0000147
438	pol_pos_77	_	| | Choline	_	_	_	_	_	_	_	_	_	_	_	_		Arabidopsis;	knapsak | PubChem | TARTARUS	B(i)
439	pol_pos_7731	_	| C06629: 6-Methylpretetramide |	_	_	_	_	_	_	_	_	_	_	_	_		Arabidopsis;	knapsak | PubChem | TARTARUS	B(i)
440	pol_pos_7759	_	| C06188: Salicin-6P |	_	_	_	_	_	_	_	_	_	_	_	_		Arabidopsis;	knapsak | PubChem | TARTARUS	B(i)
441	pol_pos_7802	_	C00013427: Ovalifolin;6-[(3-Methyl-2-butenyl)oxy]-2-phenyl-4H-furo[2,3-h]-1-benzopyran-4-one | |	_	_	_	_	_	_	_	_	_	_	_	_		Arabidopsis;	knapsak | PubChem | TARTARUS	B(i)	C0001342
442	pol_pos_7830	_	| C06895: Cefalexin | D00263: Cefalexin (JP16) |	_	_	_	_	_	_	_	_	_	_	_	_		Arabidopsis;	knapsak | PubChem | TARTARUS	B(i)
443	pol_pos_7863	_	C00010538: Deutziol | C00010600: Ajugol;Leonuride | C17011: Leonuridine |	_	_	_	_	_	_	_	_	_	_	_	_		Arabidopsis;	knapsak | PubChem | TARTARUS	B(i)	C0001053
444	pol_pos_7942	_	C00007586 | C00007829 | C08415: 19041-09-9 |	_	_	_	_	_	_	_	_	_	_	_	_		Arabidopsis;	knapsak | PubChem | TARTARUS	B(i)	C0000758
445	pol_pos_7944	_	| C18295: Pretetramide |	_	_	_	_	_	_	_	_	_	_	_	_		Arabidopsis;	knapsak | PubChem | TARTARUS	B(i)
446	pol_pos_7968	_	| C11584: 4-Methylumbelliferone glucuronide |	_	_	_	_	_	_	_	_	_	_	_	_		Arabidopsis;	knapsak | PubChem | TARTARUS	B(i)
447	pol_pos_7976	_	| C19392: Dibenzo[h,rst]pentaphene |	_	_	_	_	_	_	_	_	_	_	_	_		Arabidopsis;	knapsak | PubChem | TARTARUS	B(i)
448	pol_pos_8022	_	C00001552: Riboflavin | C00255: 7,8-Dimethyl-10-ribitylisoalloxazine, Riboflavin | D00050: 83-88-5 |	_	_	_	_	_	_	_	_	_	_	_	_		Arabidopsis;	knapsak | PubChem | TARTARUS	B(i)	C0000155
449	pol_pos_8040	_	C00007624: 5-Methylthiopentyldesulfoglucosinolate | |	_	_	_	_	_	_	_	_	_	_	_	_		Arabidopsis;	knapsak | PubChem | TARTARUS	B(i)	C0000762
450	pol_pos_8052	_	C00002422: 5,7-Dihydroxychromone | C00002462: Daphnetin | C00002471: Esculetin | C16828: Caffeoquinone |	_	_	_	_	_	_	_	_	_	_	_	_		Arabidopsis;	knapsak | PubChem | TARTARUS	B(i)	C0000242
451	pol_pos_8064	_	C00003082: Gentiopicrin | C00011171: trans-p-Feruloyl-beta-D-glucopyranoside | C09782: Gentiopicrin | C17759: 1-Feruloyl-D-glucose |	_	_	_	_	_	_	_	_	_	_	_	_		Arabidopsis;	knapsak | PubChem | TARTARUS	B(i)	C0000308
452	pol_pos_8117	_	| C14105: 1,2-Dihydroxy-7-hydroxymethylnaphthalene | C15102: 1,2,3,4-Tetrahydro-4-oxo-1-naphthoic acid |	_	_	_	_	_	_	_	_	_	_	_	_		Arabidopsis;	knapsak | PubChem | TARTARUS	B(i)
453	pol_pos_8120	_	C00017667: 7,8-Didemethyl-8-hydroxy-5-deazariboflavin;Coenzyme F0;Coenzyme FO;Factor F0 | |	_	_	_	_	_	_	_	_	_	_	_	_		Arabidopsis;	knapsak | PubChem | TARTARUS	B(i)	C0001766
454	pol_pos_8178	_	C00001531: Cibarian | C00001532: Coronarian | C08473: Cibarian | C08474: Coronarian |	_	_	_	_	_	_	_	_	_	_	_	_		Arabidopsis;	knapsak | PubChem | TARTARUS	B(i)	C0000153
455	pol_pos_8180	_	C00015104: Chrysoqueen | |	_	_	_	_	_	_	_	_	_	_	_	_		Arabidopsis;	knapsak | PubChem | TARTARUS	B(i)	C0001510
456	pol_pos_8185	_	| C00604: 1,10-Phenanthroline |	_	_	_	_	_	_	_	_	_	_	_	_		Arabidopsis;	knapsak | PubChem | TARTARUS	B(i)
457	pol_pos_8208	_	C00001558: 3-Acetylnerbowdine | C12169: 1-Epideacetylbowdensine |	_	_	_	_	_	_	_	_	_	_	_	_		Arabidopsis;	knapsak | PubChem | TARTARUS	B(i)	C0000155
458	pol_pos_8250	_	C00011270: Austamide | C00016255: (-)-Spirotriprostatin;(-)-Spirotryprostatin B;Spirotriprostatin;Spirotryprostatin B | D09544: Ozenoxacin (JAN/INN) |	_	_	_	_	_	_	_	_	_	_	_	_		Arabidopsis;	knapsak | PubChem | TARTARUS	B(i)	C0001127
459	pol_pos_8288	_	C00007548: Isopentenyladenine-9-glucoside | |	_	_	_	_	_	_	_	_	_	_	_	_		Arabidopsis;	knapsak | PubChem | TARTARUS	B(i)	C0000754
460	pol_pos_834	_	| | D-Aspartic acid OR Iminodiacetic acid	_	_	_	_	_	_	_	_	_	_	_	_		Arabidopsis;	knapsak | PubChem | TARTARUS	B(i)
461	pol_pos_8366	_	| C18918: Thiophanate |	_	_	_	_	_	_	_	_	_	_	_	_		Arabidopsis;	knapsak | PubChem | TARTARUS	B(i)
462	pol_pos_8374	_	| C16211: 6,7-Benzocoumarin |	_	_	_	_	_	_	_	_	_	_	_	_		Arabidopsis;	knapsak | PubChem | TARTARUS	B(i)
463	pol_pos_838	_	| C02615: (S)-Benzaldehyde cyanohydrin | C03766: 4-Hydroxyphenylacetonitrile | C05658: 1H-Indol-3-ol |	_	_	_	_	_	_	_	_	_	_	_	_		Arabidopsis;	knapsak | PubChem | TARTARUS	B(i)
464	pol_pos_8385	_	| C16014: cis-Stilbene oxide | C14763: (E)-4-Stilbenol |	_	_	_	_	_	_	_	_	_	_	_	_		Arabidopsis;	knapsak | PubChem | TARTARUS	B(i)
465	pol_pos_8391	_	| C14240: Di(2-ethylhexyl) adipate, Dioctyl adipate |	_	_	_	_	_	_	_	_	_	_	_	_		Arabidopsis;	knapsak | PubChem | TARTARUS	B(i)
466	pol_pos_8431	_	C00010669: Randioside | |	_	_	_	_	_	_	_	_	_	_	_	_		Arabidopsis;	knapsak | PubChem | TARTARUS	B(i)	C0001066
467	pol_pos_8436	_	C00000010: Syringin | C00010702: Syringenone | C00015365: Macrosphelide J | C01533: Eleutheroside B |	_	_	_	_	_	_	_	_	_	_	_	_		Arabidopsis;	knapsak | PubChem | TARTARUS	B(i)	C0000001
468	pol_pos_8445	_	| C11327: 2-Pyridyl hydroxymethane sulfonic acid |	_	_	_	_	_	_	_	_	_	_	_	_		Arabidopsis;	knapsak | PubChem | TARTARUS	B(i)
469	pol_pos_8461	_	| C03223: 3,4-Dihydroxyphthalate | C03233: 4,5-Dihydroxyphthalate |	_	_	_	_	_	_	_	_	_	_	_	_		Arabidopsis;	knapsak | PubChem | TARTARUS	B(i)
470	pol_pos_8524	_	C00007347: S-Adenosyl-L-methionine | C00019: S-Adenosylmethionine |	_	_	_	_	_	_	_	_	_	_	_	_		Arabidopsis;	knapsak | PubChem | TARTARUS	B(i)	C0000734
471	pol_pos_8547	_	C00000282: Inumakilactone C | |	_	_	_	_	_	_	_	_	_	_	_	_		Arabidopsis;	knapsak | PubChem | TARTARUS	B(i)	C0000028
472	pol_pos_8571	_	| C19035: Diamidafos |	_	_	_	_	_	_	_	_	_	_	_	_		Arabidopsis;	knapsak | PubChem | TARTARUS	B(i)
473	pol_pos_8587	_	C00016086: (+)-Cyclotryprostatin D;Cyclotryprostatin D;Cyclotryprostatine D | |	_	_	_	_	_	_	_	_	_	_	_	_		Arabidopsis;	knapsak | PubChem | TARTARUS	B(i)	C0001608
474	pol_pos_8606	_	C00019633: (R)-4'-Phosphopantothenoyl-L-cysteine | C04352: (R)-4'-Phosphopantothenoyl-L-cysteine, N-[(R)-4'-Phosphopantothenoyl]-L-cysteine |	_	_	_	_	_	_	_	_	_	_	_	_		Arabidopsis;	knapsak | PubChem | TARTARUS	B(i)	C0001963
475	pol_pos_8614	_	C00019032: 3-Methyl-2-butenyl 6-O-alpha-L-arabinopyranosyl-beta-D-glucopyranoside | |	_	_	_	_	_	_	_	_	_	_	_	_		Arabidopsis;	knapsak | PubChem | TARTARUS	B(i)	C0001903
476	pol_pos_8632	_	C00007547: Zeatin 9-glucoside | C00007549: Zeatin 7-glucoside;trans-Zeatin 7-glucoside | C03423: O-beta-D-Glucosylzeatin | C15546: cis-Zeatin-O-glucoside |	_	_	_	_	_	_	_	_	_	_	_	_		Arabidopsis;	knapsak | PubChem | TARTARUS	B(i)	C0000754
477	pol_pos_8645	_	C00007313: UDP;Uridine 5'-diphosphate | C00015: 58-98-0, UDP |	_	_	_	_	_	_	_	_	_	_	_	_		Arabidopsis;	knapsak | PubChem | TARTARUS	B(i)	C0000731
478	pol_pos_8712	_	| C18781: Diafenthiuron |	_	_	_	_	_	_	_	_	_	_	_	_		Arabidopsis;	knapsak | PubChem | TARTARUS	B(i)
479	pol_pos_880	_	C00007327: Phenylacetaldoxime | C07565: N-Phenylacetamide | C16075: (Z)-Phenylacetaldehyde oxime | C19714: (E)-Phenylacetaldehyde oxime | C15561: N-Benzylformamide |	_	_	_	_	_	_	_	_	_	_	_	_		Arabidopsis;	knapsak | PubChem | TARTARUS	B(i)	C0000732
480	pol_pos_8818	_	| C01297: 1-(6-Hydroxypyridin-3-yl)-4-(methylamino)butan-1-one | C17964: Pilocarpidine |	_	_	_	_	_	_	_	_	_	_	_	_		Arabidopsis;	knapsak | PubChem | TARTARUS	B(i)
481	pol_pos_8991	_	C00007460: D-myo-Inositol 1,4,5-triphosphate | C01243: 1D-myo-Inositol 1,3,4-trisphosphate, D-myo-Inositol 1,3,4-trisphosphate | C01245: 1D-myo-Inositol 1,4,5-trisphosphate, Inositol 1,4,5-trisphosphate |	_	_	_	_	_	_	_	_	_	_	_	_		Arabidopsis;	knapsak | PubChem | TARTARUS	B(i)	C0000746
482	pol_pos_9006	_	C00007802: n-Hexyl glucosinolate | C00007827: 3-Methylpentyl glucosinolate | C00007828: 4-Methylpentyl glucosinolate | |	_	_	_	_	_	_	_	_	_	_	_	_		Arabidopsis;	knapsak | PubChem | TARTARUS	B(i)	C0000780
483	pol_pos_902	_	C00001502: Hypoxanthine | C00262: 68-94-0, Hypoxanthine |	_	_	_	_	_	_	_	_	_	_	_	_		Arabidopsis;	knapsak | PubChem | TARTARUS	B(i)	C0000150
484	pol_pos_9020	_	| C02236: 4-Sulfobenzoate |	_	_	_	_	_	_	_	_	_	_	_	_		Arabidopsis;	knapsak | PubChem | TARTARUS	B(i)
485	pol_pos_9034	_	C00001892: Narcotoline | C09593: Narcotoline |	_	_	_	_	_	_	_	_	_	_	_	_		Arabidopsis;	knapsak | PubChem | TARTARUS	B(i)	C0000189
486	pol_pos_9043	_	| C19841: 4,4'-Diapo-zeta-carotene |	_	_	_	_	_	_	_	_	_	_	_	_		Arabidopsis;	knapsak | PubChem | TARTARUS	B(i)
487	pol_pos_9045	_	C00007472: D-Erythrose 4-phosphate | C00279: D-Erythrose 4-phosphate |	_	_	_	_	_	_	_	_	_	_	_	_		Arabidopsis;	knapsak | PubChem | TARTARUS	B(i)	C0000747
488	pol_pos_906	_	| C06145: 3-Butyn-1-al | C14275: Furan |	_	_	_	_	_	_	_	_	_	_	_	_		Arabidopsis;	knapsak | PubChem | TARTARUS	B(i)
489	pol_pos_9122	_	C00001674: Adifoline | |	_	_	_	_	_	_	_	_	_	_	_	_		Arabidopsis;	knapsak | PubChem | TARTARUS	B(i)	C0000167
490	pol_pos_9185	_	C00019352: Adenosine 3',5'-bisphosphate | C00019353: ADP;Adenosine 5'-diphosphate | C00019355: dGDP;Deoxyguanosine 5'-diphosphate | C00008: 58-64-0, Adenosine 5'-diphosphate | C00054: Adenosine 3',5'-bisphosphate, PAP | C00361: 2'-Deoxyguanosine 5'-diphosphate, dGDP |	_	_	_	_	_	_	_	_	_	_	_	_		Arabidopsis;	knapsak | PubChem | TARTARUS	B(i)	C0001935
491	pol_pos_9330	_	C00007647: 2-(2'-Methylthio)ethylmalic acid | C17210: 2-(2'-Methylthio)ethylmalate | C17212: 3-(2'-Methylthio)ethylmalate |	_	_	_	_	_	_	_	_	_	_	_	_		Arabidopsis;	knapsak | PubChem | TARTARUS	B(i)	C0000764
492	pol_pos_9338	_	C00002679: Turgorin | |	_	_	_	_	_	_	_	_	_	_	_	_		Arabidopsis;	knapsak | PubChem | TARTARUS	B(i)	C0000267
493	pol_pos_9376	_	| C16199: 5-Sulfosalicylate |	_	_	_	_	_	_	_	_	_	_	_	_		Arabidopsis;	knapsak | PubChem | TARTARUS	B(i)
494	pol_pos_9379	_	| C04712: (7R)-7-(5-Carboxy-5-oxopentanoyl)aminocephalosporinate |	_	_	_	_	_	_	_	_	_	_	_	_		Arabidopsis;	knapsak | PubChem | TARTARUS	B(i)
495	pol_pos_9398	_	C00007545 | C08419: 21414-41-5 |	_	_	_	_	_	_	_	_	_	_	_	_		Arabidopsis;	knapsak | PubChem | TARTARUS	B(i)	C0000754
496	pol_pos_9451	_	| D01672: Gabexate mesylate |	_	_	_	_	_	_	_	_	_	_	_	_		Arabidopsis;	knapsak | PubChem | TARTARUS	B(i)
497	pol_pos_9544	_	| C02305: 67-07-2, Creatine phosphate, Phosphocreatine |	_	_	_	_	_	_	_	_	_	_	_	_		Arabidopsis;	knapsak | PubChem | TARTARUS	B(i)
498	pol_pos_9611	_	C00000125 | C05837: 4356-52-9 |	_	_	_	_	_	_	_	_	_	_	_	_		Arabidopsis;	knapsak | PubChem | TARTARUS	B(i)	C0000012
499	pol_pos_9715	_	C00007856: 3-Phenylpropyl glucosinolate | |	_	_	_	_	_	_	_	_	_	_	_	_		Arabidopsis;	knapsak | PubChem | TARTARUS	B(i)	C0000785
500	pol_pos_9847	_	| D01508: Phenylacetylglycine dimethylamide (JAN) | C12958: Phenylacetylglycine dimethylamide |	_	_	_	_	_	_	_	_	_	_	_	_		Arabidopsis;	knapsak | PubChem | TARTARUS	B(i)
501	pol_pos_9855	_	C00007353 | |	_	_	_	_	_	_	_	_	_	_	_	_		Arabidopsis;	knapsak | PubChem | TARTARUS	B(i)	C0000735
502	pol_pos_9937	_	C00007608: 4-Metyl-5-(beta-hydroxyethyl)thiazole phosphate | C04327: 4-Methyl-5-(2-phosphoethyl)-thiazole |	_	_	_	_	_	_	_	_	_	_	_	_		Arabidopsis;	knapsak | PubChem | TARTARUS	B(i)	C0000760
